# Supplementary material for: Nascent alt-protein chemoproteomics reveals a repressor of ribosome biogenesis
Source: Research Square preprint supplement (doi:10.21203/rs.3.rs-871945/v1), 2021-09-09
Supplement: Supplementary file 2 [file 0b6d07d7e852944503896afa.xlsx]

## Sheet: Key
Abbreviations used for protein and peptide identification summary tables
Peptide Identifications
Database Accession	UniProt + MINAS-60 protein; contaminants
Peptide m/z	Observed mass over charge
Peptide Mass	Observed relative molecular mass
Peptide Score	Peptide match score
Sequence	Sequence of the peptide in 1-letter code
Modifications	Any variable modifications found in the peptide
Protein Identifications
LFQ intensity	Label-free quantification intensity
Protein IDs	The name of protein identified
Worksheets
S1	Key
S2	Interacted partner protein level evidence

## Sheet: Interacted partner of MRTO4
Protein IDs	Majority protein IDs	KD/Ctrl-1	KD/Ctrl-2	KD/Ctrl-3	KD/Ctrl-4	LFQ intensity Ctrl_MRTO4-1	LFQ intensity Ctrl_MRTO4-2	LFQ intensity Ctrl_MRTO4-3	LFQ intensity Ctrl_MRTO4-4	LFQ intensity KD_MRTO4-1	LFQ intensity KD_MRTO4-2	LFQ intensity KD_MRTO4-3	LFQ intensity KD_MRTO4-4	Peptide counts (all)	Peptide counts (razor+unique)	Peptide counts (unique)	Fasta headers	Number of proteins	Peptides	Razor + unique peptides	Unique peptides	Peptides Ctrl_MRTO4-1	Peptides Ctrl_MRTO4-2	Peptides Ctrl_MRTO4-3	Peptides Ctrl_MRTO4-4	Peptides KD_MRTO4-1	Peptides KD_MRTO4-2	Peptides KD_MRTO4-3	Peptides KD_MRTO4-4	Razor + unique peptides Ctrl_MRTO4-1	Razor + unique peptides Ctrl_MRTO4-2	Razor + unique peptides Ctrl_MRTO4-3	Razor + unique peptides Ctrl_MRTO4-4	Razor + unique peptides KD_MRTO4-1	Razor + unique peptides KD_MRTO4-2	Razor + unique peptides KD_MRTO4-3	Razor + unique peptides KD_MRTO4-4	Unique peptides Ctrl_MRTO4-1	Unique peptides Ctrl_MRTO4-2	Unique peptides Ctrl_MRTO4-3	Unique peptides Ctrl_MRTO4-4	Unique peptides KD_MRTO4-1	Unique peptides KD_MRTO4-2	Unique peptides KD_MRTO4-3	Unique peptides KD_MRTO4-4	Sequence coverage [%]	Unique + razor sequence coverage [%]	Unique sequence coverage [%]	Mol. weight [kDa]
tr|Q5TEC6|Q5TEC6_HUMAN;tr|K7EMV3|K7EMV3_HUMAN;tr|K7EP01|K7EP01_HUMAN;tr|B4DEB1|B4DEB1_HUMAN;tr|K7EK07|K7EK07_HUMAN;sp|Q6NXT2|H3C_HUMAN;sp|Q71DI3|H32_HUMAN;sp|Q16695|H31T_HUMAN;sp|P84243|H33_HUMAN;sp|P68431|H31_HUMAN;tr|K7ES00|K7ES00_HUMAN	tr|Q5TEC6|Q5TEC6_HUMAN;tr|K7EMV3|K7EMV3_HUMAN;tr|K7EP01|K7EP01_HUMAN;tr|B4DEB1|B4DEB1_HUMAN;tr|K7EK07|K7EK07_HUMAN;sp|Q6NXT2|H3C_HUMAN;sp|Q71DI3|H32_HUMAN;sp|Q16695|H31T_HUMAN;sp|P84243|H33_HUMAN;sp|P68431|H31_HUMAN;tr|K7ES00|K7ES00_HUMAN	5.28765e-08	1.067	25817000	24495000	18912000	13999000	1	1	1	14937000	25817000	24495000	3;2;2;2;2;2;2;2;2;2;2	3;2;2;2;2;2;2;2;2;2;2	3;2;2;2;2;2;2;2;2;2;2	tr|Q5TEC6|Q5TEC6_HUMAN Histone H3 OS=Homo sapiens GN=HIST2H3PS2 PE=1 SV=1;tr|K7EMV3|K7EMV3_HUMAN Histone H3 OS=Homo sapiens GN=H3F3B PE=1 SV=1;tr|K7EP01|K7EP01_HUMAN Histone H3.3 OS=Homo sapiens GN=H3F3B PE=1 SV=1;tr|B4DEB1|B4DEB1_HUMAN Histone H3 OS=Homo	11	3	3	3	2	2	1	1	2	2	2	2	2	2	1	1	2	2	2	2	2	2	1	1	2	2	2	2	19.9	19.9	19.9	15.43
sp|P05386|RLA1_HUMAN	sp|P05386|RLA1_HUMAN	1	9877100	13583000	19996000	1	1	1	1	1	9877100	13583000	19996000	3	2	2	sp|P05386|RLA1_HUMAN 60S acidic ribosomal protein P1 OS=Homo sapiens GN=RPLP1 PE=1 SV=1	1	3	2	2	1	1	1	1	1	2	3	3	1	1	1	1	1	2	2	2	1	1	1	1	1	2	2	2	66.7	51.8	51.8	11.514
sp|P61978|HNRPK_HUMAN;tr|S4R359|S4R359_HUMAN	sp|P61978|HNRPK_HUMAN	6096200	30867000	0.735635	14797000	1	1	10686000	1	6096200	30867000	7861000	14797000	16;3	3;2	3;2	sp|P61978|HNRPK_HUMAN Heterogeneous nuclear ribonucleoprotein K OS=Homo sapiens GN=HNRNPK PE=1 SV=1	2	16	3	3	11	10	10	14	13	9	11	12	1	1	1	2	2	1	1	1	1	1	1	2	2	1	1	1	40.8	9.3	9.3	50.976
tr|E9PK91|E9PK91_HUMAN;tr|H0YF63|H0YF63_HUMAN	tr|E9PK91|E9PK91_HUMAN	1	1	1	12761000	1	1	1	1	1	1	1	12761000	43;9	1;1	1;1	tr|E9PK91|E9PK91_HUMAN Bcl-2-associated transcription factor 1 OS=Homo sapiens GN=BCLAF1 PE=1 SV=1	2	43	1	1	23	23	29	26	30	30	30	28	0	0	1	0	0	1	1	1	0	0	1	0	0	1	1	1	42	1.8	1.8	100.4
sp|P62304|RUXE_HUMAN;tr|A6NHK2|A6NHK2_HUMAN	sp|P62304|RUXE_HUMAN;tr|A6NHK2|A6NHK2_HUMAN	0.471639	1	1	7535500	9619000	1	1	1	4536700	1	1	7535500	2;1	2;1	2;1	sp|P62304|RUXE_HUMAN Small nuclear ribonucleoprotein E OS=Homo sapiens GN=SNRPE PE=1 SV=1;tr|A6NHK2|A6NHK2_HUMAN Small nuclear ribonucleoprotein E OS=Homo sapiens GN=SNRPE PE=1 SV=1	2	2	2	2	2	1	1	1	2	1	1	2	2	1	1	1	2	1	1	2	2	1	1	1	2	1	1	2	25	25	25	10.803
sp|Q14137|BOP1_HUMAN;tr|A0A075B729|A0A075B729_HUMAN	sp|Q14137|BOP1_HUMAN	3202600	3394200	1.36108	6403100	1	1	2585600	1	3202600	3394200	3519200	6403100	9;3	9;3	9;3	sp|Q14137|BOP1_HUMAN Ribosome biogenesis protein BOP1 OS=Homo sapiens GN=BOP1 PE=1 SV=2	2	9	9	9	0	0	5	0	4	2	4	8	0	0	5	0	4	2	4	8	0	0	5	0	4	2	4	8	15.7	15.7	15.7	83.629
sp|Q96IM9|DYDC2_HUMAN;tr|H7C4K4|H7C4K4_HUMAN;tr|E7EV88|E7EV88_HUMAN;tr|H0YAY0|H0YAY0_HUMAN	sp|Q96IM9|DYDC2_HUMAN;tr|H7C4K4|H7C4K4_HUMAN;tr|E7EV88|E7EV88_HUMAN;tr|H0YAY0|H0YAY0_HUMAN	1	1	1	6151900	1	1	1	1	1	1	1	6151900	2;1;1;1	2;1;1;1	2;1;1;1	sp|Q96IM9|DYDC2_HUMAN DPY30 domain-containing protein 2 OS=Homo sapiens GN=DYDC2 PE=2 SV=1;tr|H7C4K4|H7C4K4_HUMAN Hereditary hemochromatosis protein (Fragment) OS=Homo sapiens GN=HFE PE=4 SV=1;tr|E7EV88|E7EV88_HUMAN A disintegrin and metalloproteinase with	4	2	2	2	1	0	1	0	2	1	1	2	1	0	1	0	2	1	1	2	1	0	1	0	2	1	1	2	0	0	0	5898.6
tr|A0A087WXM6|A0A087WXM6_HUMAN;tr|J3QQT2|J3QQT2_HUMAN;tr|J3KRX5|J3KRX5_HUMAN;sp|P18621|RL17_HUMAN;tr|A0A0A6YYL6|A0A0A6YYL6_HUMAN;tr|J3KRB3|J3KRB3_HUMAN;tr|A0A087WWH0|A0A087WWH0_HUMAN;tr|J3QS96|J3QS96_HUMAN;tr|J3QLC8|J3QLC8_HUMAN;tr|A0A0A0MRF8|A0A0A0MRF8_HUMAN;tr|A0A087WY81|A0A087WY81_HUMAN;tr|J3KSJ0|J3KSJ0_HUMAN	tr|A0A087WXM6|A0A087WXM6_HUMAN;tr|J3QQT2|J3QQT2_HUMAN;tr|J3KRX5|J3KRX5_HUMAN;sp|P18621|RL17_HUMAN;tr|A0A0A6YYL6|A0A0A6YYL6_HUMAN;tr|J3KRB3|J3KRB3_HUMAN;tr|A0A087WWH0|A0A087WWH0_HUMAN;tr|J3QS96|J3QS96_HUMAN;tr|J3QLC8|J3QLC8_HUMAN;tr|A0A0A0MRF8|A0A0A0MRF8_HUMAN;tr|A0A087WY81|A0A087WY81_HUMAN	1.2385	0.705337	2.56821	6019100	4643100	6316700	3314800	1	5750500	4455400	8513100	6019100	7;7;7;7;7;6;6;6;6;6;4;1	7;7;7;7;7;6;6;6;6;6;4;1	7;7;7;7;7;6;6;6;6;6;4;1	tr|A0A087WXM6|A0A087WXM6_HUMAN 60S ribosomal protein L17 (Fragment) OS=Homo sapiens GN=RPL17 PE=1 SV=1;tr|J3QQT2|J3QQT2_HUMAN 60S ribosomal protein L17 (Fragment) OS=Homo sapiens GN=RPL17 PE=1 SV=1;tr|J3KRX5|J3KRX5_HUMAN 60S ribosomal protein L17 (Fragment	12	7	7	7	2	2	2	1	4	5	5	5	2	2	2	1	4	5	5	5	2	2	2	1	4	5	5	5	40.2	40.2	40.2	19.586
sp|O15381|NVL_HUMAN;tr|E7EWK7|E7EWK7_HUMAN;tr|E9PGD8|E9PGD8_HUMAN;tr|E9PH71|E9PH71_HUMAN;tr|C9JP83|C9JP83_HUMAN;tr|C9J6P7|C9J6P7_HUMAN	sp|O15381|NVL_HUMAN	3169700	2879400	4027500	4988700	1	1	1	1	3169700	2879400	4027500	4988700	11;4;3;3;1;1	11;4;3;3;1;1	11;4;3;3;1;1	sp|O15381|NVL_HUMAN Nuclear valosin-containing protein-like OS=Homo sapiens GN=NVL PE=1 SV=1	6	11	11	11	0	0	1	1	6	5	9	8	0	0	1	1	6	5	9	8	0	0	1	1	6	5	9	8	15.3	15.3	15.3	95.05
sp|P62266|RS23_HUMAN;tr|D6RD47|D6RD47_HUMAN;tr|D6RDJ2|D6RDJ2_HUMAN;tr|D6RIX0|D6RIX0_HUMAN;tr|D6R9I7|D6R9I7_HUMAN	sp|P62266|RS23_HUMAN;tr|D6RD47|D6RD47_HUMAN	1	1	1	4526700	1	1	1	1	1	1	1	4526700	3;2;1;1;1	3;2;1;1;1	3;2;1;1;1	sp|P62266|RS23_HUMAN 40S ribosomal protein S23 OS=Homo sapiens GN=RPS23 PE=1 SV=3;tr|D6RD47|D6RD47_HUMAN 40S ribosomal protein S23 OS=Homo sapiens GN=RPS23 PE=1 SV=1	5	3	3	3	1	1	1	1	1	1	2	2	1	1	1	1	1	1	2	2	1	1	1	1	1	1	2	2	23.8	23.8	23.8	15.807
sp|O60832|DKC1_HUMAN;tr|C9IYT0|C9IYT0_HUMAN;tr|H7C0M1|H7C0M1_HUMAN;tr|H7BZF2|H7BZF2_HUMAN;tr|H7C2Q9|H7C2Q9_HUMAN;tr|H7C2Q2|H7C2Q2_HUMAN	sp|O60832|DKC1_HUMAN;tr|C9IYT0|C9IYT0_HUMAN;tr|H7C0M1|H7C0M1_HUMAN	1993800	2529900	4292900	4425500	1	1	1	1	1993800	2529900	4292900	4425500	8;6;4;2;2;1	8;6;4;2;2;1	8;6;4;2;2;1	sp|O60832|DKC1_HUMAN H/ACA ribonucleoprotein complex subunit 4 OS=Homo sapiens GN=DKC1 PE=1 SV=3;tr|C9IYT0|C9IYT0_HUMAN H/ACA ribonucleoprotein complex subunit 4 (Fragment) OS=Homo sapiens GN=DKC1 PE=1 SV=5;tr|H7C0M1|H7C0M1_HUMAN H/ACA ribonucleoprotein co	6	8	8	8	0	0	1	0	2	4	7	6	0	0	1	0	2	4	7	6	0	0	1	0	2	4	7	6	16.7	16.7	16.7	57.673
tr|F8W7C6|F8W7C6_HUMAN;tr|A0A087WV22|A0A087WV22_HUMAN;tr|X1WI28|X1WI28_HUMAN;sp|P27635|RL10_HUMAN;tr|H7C123|H7C123_HUMAN;tr|H7C2C5|H7C2C5_HUMAN;sp|Q96L21|RL10L_HUMAN;tr|H7C2U2|H7C2U2_HUMAN;tr|B8A6G2|B8A6G2_HUMAN;tr|A6QRI9|A6QRI9_HUMAN	tr|F8W7C6|F8W7C6_HUMAN;tr|A0A087WV22|A0A087WV22_HUMAN;tr|X1WI28|X1WI28_HUMAN;sp|P27635|RL10_HUMAN;tr|H7C123|H7C123_HUMAN;tr|H7C2C5|H7C2C5_HUMAN;sp|Q96L21|RL10L_HUMAN	1547600	2036000	3804300	4164400	1	1	1	1	1547600	2036000	3804300	4164400	5;5;5;5;3;3;3;1;1;1	5;5;5;5;3;3;3;1;1;1	5;5;5;5;3;3;3;1;1;1	tr|F8W7C6|F8W7C6_HUMAN 60S ribosomal protein L10 OS=Homo sapiens GN=RPL10 PE=1 SV=2;tr|A0A087WV22|A0A087WV22_HUMAN 60S ribosomal protein L10 OS=Homo sapiens GN=RPL10 PE=1 SV=1;tr|X1WI28|X1WI28_HUMAN 60S ribosomal protein L10 (Fragment) OS=Homo sapiens GN=R	10	5	5	5	0	0	0	0	3	2	5	3	0	0	0	0	3	2	5	3	0	0	0	0	3	2	5	3	27.6	27.6	27.6	18.565
sp|P55769|NH2L1_HUMAN;tr|B1AHD1|B1AHD1_HUMAN	sp|P55769|NH2L1_HUMAN;tr|B1AHD1|B1AHD1_HUMAN	3028100	1785000	2.55725	3945900	1	1	1414800	1	3028100	1785000	3618000	3945900	3;3	3;3	3;3	sp|P55769|NH2L1_HUMAN NHP2-like protein 1 OS=Homo sapiens GN=NHP2L1 PE=1 SV=3;tr|B1AHD1|B1AHD1_HUMAN NHP2-like protein 1 OS=Homo sapiens GN=NHP2L1 PE=1 SV=1	2	3	3	3	0	1	2	0	3	2	3	3	0	1	2	0	3	2	3	3	0	1	2	0	3	2	3	3	24.2	24.2	24.2	14.173
sp|Q6DKI1|RL7L_HUMAN;tr|R4GMU7|R4GMU7_HUMAN	sp|Q6DKI1|RL7L_HUMAN;tr|R4GMU7|R4GMU7_HUMAN	3003200	2948900	3950600	3861900	1	1	1	1	3003200	2948900	3950600	3861900	6;5	6;5	6;5	sp|Q6DKI1|RL7L_HUMAN 60S ribosomal protein L7-like 1 OS=Homo sapiens GN=RPL7L1 PE=1 SV=1;tr|R4GMU7|R4GMU7_HUMAN 60S ribosomal protein L7-like 1 OS=Homo sapiens GN=RPL7L1 PE=1 SV=1	2	6	6	6	1	1	1	1	4	3	4	3	1	1	1	1	4	3	4	3	1	1	1	1	4	3	4	3	29.3	29.3	29.3	28.661
tr|A0A087X1N2|A0A087X1N2_HUMAN;sp|Q03701|CEBPZ_HUMAN	tr|A0A087X1N2|A0A087X1N2_HUMAN;sp|Q03701|CEBPZ_HUMAN	1990800	1	4134000	3724300	1	1	1	1	1990800	1	4134000	3724300	12;12	12;12	12;12	tr|A0A087X1N2|A0A087X1N2_HUMAN CCAAT/enhancer-binding protein zeta OS=Homo sapiens GN=CEBPZ PE=1 SV=1;sp|Q03701|CEBPZ_HUMAN CCAAT/enhancer-binding protein zeta OS=Homo sapiens GN=CEBPZ PE=1 SV=3	2	12	12	12	0	1	0	1	3	2	8	9	0	1	0	1	3	2	8	9	0	1	0	1	3	2	8	9	13.2	13.2	13.2	114.16
tr|B7Z6D5|B7Z6D5_HUMAN;sp|Q96GQ7|DDX27_HUMAN;tr|A0A087X059|A0A087X059_HUMAN;tr|A0A087WYH5|A0A087WYH5_HUMAN	tr|B7Z6D5|B7Z6D5_HUMAN;sp|Q96GQ7|DDX27_HUMAN	1888800	2113200	2583200	3436000	1	1	1	1	1888800	2113200	2583200	3436000	9;9;3;1	9;9;3;1	9;9;3;1	tr|B7Z6D5|B7Z6D5_HUMAN Probable ATP-dependent RNA helicase DDX27 OS=Homo sapiens GN=DDX27 PE=1 SV=1;sp|Q96GQ7|DDX27_HUMAN Probable ATP-dependent RNA helicase DDX27 OS=Homo sapiens GN=DDX27 PE=1 SV=2	4	9	9	9	0	0	0	1	5	5	6	6	0	0	0	1	5	5	6	6	0	0	0	1	5	5	6	6	13.5	13.5	13.5	86.604
sp|Q9NVP1|DDX18_HUMAN;tr|H7C452|H7C452_HUMAN	sp|Q9NVP1|DDX18_HUMAN	3058700	2382900	1.96974	3424600	1	1	2402600	1	3058700	2382900	4732500	3424600	10;2	10;2	10;2	sp|Q9NVP1|DDX18_HUMAN ATP-dependent RNA helicase DDX18 OS=Homo sapiens GN=DDX18 PE=1 SV=2	2	10	10	10	0	0	3	1	6	4	9	6	0	0	3	1	6	4	9	6	0	0	3	1	6	4	9	6	18.2	18.2	18.2	75.406
tr|J3QSV6|J3QSV6_HUMAN;sp|O76021|RL1D1_HUMAN;tr|I3L3C4|I3L3C4_HUMAN;tr|I3L3U9|I3L3U9_HUMAN;tr|I3L234|I3L234_HUMAN	tr|J3QSV6|J3QSV6_HUMAN;sp|O76021|RL1D1_HUMAN;tr|I3L3C4|I3L3C4_HUMAN;tr|I3L3U9|I3L3U9_HUMAN;tr|I3L234|I3L234_HUMAN	1	1	4588800	3366000	1	1	1	1	1	1	4588800	3366000	6;6;4;4;3	6;6;4;4;3	6;6;4;4;3	tr|J3QSV6|J3QSV6_HUMAN Ribosomal L1 domain-containing protein 1 (Fragment) OS=Homo sapiens GN=RSL1D1 PE=1 SV=1;sp|O76021|RL1D1_HUMAN Ribosomal L1 domain-containing protein 1 OS=Homo sapiens GN=RSL1D1 PE=1 SV=3;tr|I3L3C4|I3L3C4_HUMAN Ribosomal L1 domain-con	5	6	6	6	0	0	1	1	1	1	4	4	0	0	1	1	1	1	4	4	0	0	1	1	1	1	4	4	17	17	17	48.208
sp|A6NHQ2|FBLL1_HUMAN	sp|A6NHQ2|FBLL1_HUMAN	1	1	1	3342400	1	1	1	1	1	1	1	3342400	2	1	1	sp|A6NHQ2|FBLL1_HUMAN rRNA/tRNA 2-O-methyltransferase fibrillarin-like protein 1 OS=Homo sapiens GN=FBLL1 PE=3 SV=2	1	2	1	1	2	0	2	2	2	1	2	2	1	0	1	1	1	0	1	1	1	0	1	1	1	0	1	1	6.6	3.3	3.3	34.803
tr|D6RC52|D6RC52_HUMAN;tr|D6RCB9|D6RCB9_HUMAN;sp|Q9NX24|NHP2_HUMAN;tr|H0YC83|H0YC83_HUMAN;tr|J3QSY4|J3QSY4_HUMAN	tr|D6RC52|D6RC52_HUMAN;tr|D6RCB9|D6RCB9_HUMAN;sp|Q9NX24|NHP2_HUMAN;tr|H0YC83|H0YC83_HUMAN;tr|J3QSY4|J3QSY4_HUMAN	1882200	1	3341400	3284400	1	1	1	1	1882200	1	3341400	3284400	2;2;2;1;1	2;2;2;1;1	2;2;2;1;1	tr|D6RC52|D6RC52_HUMAN H/ACA ribonucleoprotein complex subunit 2 (Fragment) OS=Homo sapiens GN=NHP2 PE=1 SV=1;tr|D6RCB9|D6RCB9_HUMAN H/ACA ribonucleoprotein complex subunit 2 (Fragment) OS=Homo sapiens GN=NHP2 PE=1 SV=1;sp|Q9NX24|NHP2_HUMAN H/ACA ribonucle	5	2	2	2	0	0	0	0	2	1	2	2	0	0	0	0	2	1	2	2	0	0	0	0	2	1	2	2	22	22	22	15.017
tr|B8ZZX6|B8ZZX6_HUMAN;sp|Q658P3|STEA3_HUMAN	tr|B8ZZX6|B8ZZX6_HUMAN;sp|Q658P3|STEA3_HUMAN	1	1	1	3278900	1	1	1	1	1	1	1	3278900	1;1	1;1	1;1	tr|B8ZZX6|B8ZZX6_HUMAN Metalloreductase STEAP3 OS=Homo sapiens GN=STEAP3 PE=1 SV=1;sp|Q658P3|STEA3_HUMAN Metalloreductase STEAP3 OS=Homo sapiens GN=STEAP3 PE=1 SV=2	2	1	1	1	1	1	0	0	1	1	1	1	1	1	0	0	1	1	1	1	1	1	0	0	1	1	1	1	2.8	2.8	2.8	50.628
sp|P62750|RL23A_HUMAN;tr|H7BY10|H7BY10_HUMAN;tr|K7EJV9|K7EJV9_HUMAN;tr|K7ERT8|K7ERT8_HUMAN;tr|A8MUS3|A8MUS3_HUMAN;tr|K7EMA7|K7EMA7_HUMAN	sp|P62750|RL23A_HUMAN;tr|H7BY10|H7BY10_HUMAN;tr|K7EJV9|K7EJV9_HUMAN;tr|K7ERT8|K7ERT8_HUMAN;tr|A8MUS3|A8MUS3_HUMAN;tr|K7EMA7|K7EMA7_HUMAN	1	1264700	1	3249000	1	1	1	1	1	1264700	1	3249000	4;4;4;4;4;3	4;4;4;4;4;3	4;4;4;4;4;3	sp|P62750|RL23A_HUMAN 60S ribosomal protein L23a OS=Homo sapiens GN=RPL23A PE=1 SV=1;tr|H7BY10|H7BY10_HUMAN 60S ribosomal protein L23a (Fragment) OS=Homo sapiens GN=RPL23A PE=1 SV=1;tr|K7EJV9|K7EJV9_HUMAN 60S ribosomal protein L23a (Fragment) OS=Homo sapie	6	4	4	4	1	1	1	1	1	2	2	3	1	1	1	1	1	2	2	3	1	1	1	1	1	2	2	3	25.6	25.6	25.6	17.695
sp|Q9BYG3|MK67I_HUMAN;tr|C9J808|C9J808_HUMAN;tr|C9J6C5|C9J6C5_HUMAN;tr|H7BZL0|H7BZL0_HUMAN	sp|Q9BYG3|MK67I_HUMAN;tr|C9J808|C9J808_HUMAN;tr|C9J6C5|C9J6C5_HUMAN	3275900	2110900	3307200	2931800	1	1	1	1	3275900	2110900	3307200	2931800	9;5;5;2	9;5;5;2	9;5;5;2	sp|Q9BYG3|MK67I_HUMAN MKI67 FHA domain-interacting nucleolar phosphoprotein OS=Homo sapiens GN=NIFK PE=1 SV=1;tr|C9J808|C9J808_HUMAN MKI67 FHA domain-interacting nucleolar phosphoprotein (Fragment) OS=Homo sapiens GN=NIFK PE=1 SV=5;tr|C9J6C5|C9J6C5_HUMAN M	4	9	9	9	0	0	0	0	6	4	8	6	0	0	0	0	6	4	8	6	0	0	0	0	6	4	8	6	34.1	34.1	34.1	34.222
sp|Q9NY93|DDX56_HUMAN;tr|H7C3E9|H7C3E9_HUMAN;tr|J3KQ18|J3KQ18_HUMAN;tr|F8WDT8|F8WDT8_HUMAN;tr|F8WEI3|F8WEI3_HUMAN;tr|H7BZN7|H7BZN7_HUMAN	sp|Q9NY93|DDX56_HUMAN;tr|H7C3E9|H7C3E9_HUMAN;tr|J3KQ18|J3KQ18_HUMAN;tr|F8WDT8|F8WDT8_HUMAN	2601900	2691100	2.42398	2738900	1	1	1904100	1	2601900	2691100	4615500	2738900	8;6;6;4;2;2	8;6;6;4;2;2	8;6;6;4;2;2	sp|Q9NY93|DDX56_HUMAN Probable ATP-dependent RNA helicase DDX56 OS=Homo sapiens GN=DDX56 PE=1 SV=1;tr|H7C3E9|H7C3E9_HUMAN Probable ATP-dependent RNA helicase DDX56 (Fragment) OS=Homo sapiens GN=DDX56 PE=1 SV=1;tr|J3KQ18|J3KQ18_HUMAN D-dopachrome decarboxyl	6	8	8	8	0	1	2	1	4	6	7	6	0	1	2	1	4	6	7	6	0	1	2	1	4	6	7	6	17.2	17.2	17.2	61.589
sp|Q8TED0|UTP15_HUMAN;tr|H0Y8P4|H0Y8P4_HUMAN;tr|D6RF65|D6RF65_HUMAN	sp|Q8TED0|UTP15_HUMAN;tr|H0Y8P4|H0Y8P4_HUMAN	1975500	1864900	2908600	2727700	1	1	1	1	1975500	1864900	2908600	2727700	8;6;2	8;6;2	8;6;2	sp|Q8TED0|UTP15_HUMAN U3 small nucleolar RNA-associated protein 15 homolog OS=Homo sapiens GN=UTP15 PE=1 SV=3;tr|H0Y8P4|H0Y8P4_HUMAN U3 small nucleolar RNA-associated protein 15 homolog (Fragment) OS=Homo sapiens GN=UTP15 PE=1 SV=1	3	8	8	8	0	0	0	1	3	3	6	4	0	0	0	1	3	3	6	4	0	0	0	1	3	3	6	4	17.6	17.6	17.6	58.414
sp|O75367|H2AY_HUMAN;tr|B4DJC3|B4DJC3_HUMAN;tr|D6RCF2|D6RCF2_HUMAN	sp|O75367|H2AY_HUMAN;tr|B4DJC3|B4DJC3_HUMAN	1	1	1923300	2724800	1	1	1	1	1	1	1923300	2724800	5;3;1	5;3;1	5;3;1	sp|O75367|H2AY_HUMAN Core histone macro-H2A.1 OS=Homo sapiens GN=H2AFY PE=1 SV=4;tr|B4DJC3|B4DJC3_HUMAN Histone H2A OS=Homo sapiens GN=H2AFY PE=1 SV=1	3	5	5	5	0	0	0	1	1	2	3	4	0	0	0	1	1	2	3	4	0	0	0	1	1	2	3	4	22	22	22	39.617
tr|H3BPE7|H3BPE7_HUMAN;sp|P35637|FUS_HUMAN;tr|A0A075B7D9|A0A075B7D9_HUMAN;sp|Q92804|RBP56_HUMAN	tr|H3BPE7|H3BPE7_HUMAN;sp|P35637|FUS_HUMAN	1	1647000	1	2699600	1	1	1	1	1	1647000	1	2699600	5;5;2;2	5;5;2;2	5;5;2;2	tr|H3BPE7|H3BPE7_HUMAN RNA-binding protein FUS OS=Homo sapiens GN=FUS PE=1 SV=1;sp|P35637|FUS_HUMAN RNA-binding protein FUS OS=Homo sapiens GN=FUS PE=1 SV=1	4	5	5	5	0	0	0	1	3	3	2	3	0	0	0	1	3	3	2	3	0	0	0	1	3	3	2	3	8.5	8.5	8.5	53.496
sp|Q14684|RRP1B_HUMAN	sp|Q14684|RRP1B_HUMAN	2655300	2923300	3424100	2612700	1	1	1	1	2655300	2923300	3424100	2612700	13	13	13	sp|Q14684|RRP1B_HUMAN Ribosomal RNA processing protein 1 homolog B OS=Homo sapiens GN=RRP1B PE=1 SV=3	1	13	13	13	0	1	1	0	6	6	6	9	0	1	1	0	6	6	6	9	0	1	1	0	6	6	6	9	19.3	19.3	19.3	84.427
sp|Q14692|BMS1_HUMAN	sp|Q14692|BMS1_HUMAN	3159900	2086600	1.12864	2595900	1	1	2104300	1	3159900	2086600	2375000	2595900	7	7	7	sp|Q14692|BMS1_HUMAN Ribosome biogenesis protein BMS1 homolog OS=Homo sapiens GN=BMS1 PE=1 SV=1	1	7	7	7	0	1	2	1	6	4	4	5	0	1	2	1	6	4	4	5	0	1	2	1	6	4	4	5	6.7	6.7	6.7	145.81
sp|Q9NY12|GAR1_HUMAN	sp|Q9NY12|GAR1_HUMAN	1984000	1597900	2612500	2590400	1	1	1	1	1984000	1597900	2612500	2590400	3	3	3	sp|Q9NY12|GAR1_HUMAN H/ACA ribonucleoprotein complex subunit 1 OS=Homo sapiens GN=GAR1 PE=1 SV=1	1	3	3	3	0	1	1	2	2	3	2	3	0	1	1	2	2	3	2	3	0	1	1	2	2	3	2	3	10.6	10.6	10.6	22.348
sp|P56182|RRP1_HUMAN;tr|D6RE82|D6RE82_HUMAN	sp|P56182|RRP1_HUMAN	2664800	2097700	1.90246	2581600	1	1	1340000	1	2664800	2097700	2549300	2581600	5;1	5;1	5;1	sp|P56182|RRP1_HUMAN Ribosomal RNA processing protein 1 homolog A OS=Homo sapiens GN=RRP1 PE=1 SV=1	2	5	5	5	1	1	2	1	2	4	5	4	1	1	2	1	2	4	5	4	1	1	2	1	2	4	5	4	13.2	13.2	13.2	52.839
sp|Q9Y3T9|NOC2L_HUMAN	sp|Q9Y3T9|NOC2L_HUMAN	1	1874800	1853600	2555300	1	1	1	1	1	1874800	1853600	2555300	11	11	11	sp|Q9Y3T9|NOC2L_HUMAN Nucleolar complex protein 2 homolog OS=Homo sapiens GN=NOC2L PE=1 SV=4	1	11	11	11	0	0	0	2	4	3	7	4	0	0	0	2	4	3	7	4	0	0	0	2	4	3	7	4	13.4	13.4	13.4	84.918
sp|O43818|U3IP2_HUMAN	sp|O43818|U3IP2_HUMAN	1435500	1	2679800	2519100	1	1	1	1	1435500	1	2679800	2519100	7	7	7	sp|O43818|U3IP2_HUMAN U3 small nucleolar RNA-interacting protein 2 OS=Homo sapiens GN=RRP9 PE=1 SV=1	1	7	7	7	0	0	0	0	3	1	6	4	0	0	0	0	3	1	6	4	0	0	0	0	3	1	6	4	17.1	17.1	17.1	51.84
sp|Q9Y5J1|UTP18_HUMAN;tr|J3KSR7|J3KSR7_HUMAN;tr|J3QLD6|J3QLD6_HUMAN;tr|J3QRG0|J3QRG0_HUMAN;tr|J3QR85|J3QR85_HUMAN	sp|Q9Y5J1|UTP18_HUMAN;tr|J3KSR7|J3KSR7_HUMAN	1760200	1	2391900	2497300	1	1	1	1	1760200	1	2391900	2497300	6;3;1;1;1	6;3;1;1;1	6;3;1;1;1	sp|Q9Y5J1|UTP18_HUMAN U3 small nucleolar RNA-associated protein 18 homolog OS=Homo sapiens GN=UTP18 PE=1 SV=3;tr|J3KSR7|J3KSR7_HUMAN U3 small nucleolar RNA-associated protein 18 homolog (Fragment) OS=Homo sapiens GN=UTP18 PE=1 SV=1	5	6	6	6	0	0	1	1	3	2	5	5	0	0	1	1	3	2	5	5	0	0	1	1	3	2	5	5	12.2	12.2	12.2	62.003
sp|P17066|HSP76_HUMAN;sp|P48741|HSP77_HUMAN	sp|P17066|HSP76_HUMAN;sp|P48741|HSP77_HUMAN	1	1	1	2476500	1	1	1	1	1	1	1	2476500	7;4	1;1	1;1	sp|P17066|HSP76_HUMAN Heat shock 70 kDa protein 6 OS=Homo sapiens GN=HSPA6 PE=1 SV=2;sp|P48741|HSP77_HUMAN Putative heat shock 70 kDa protein 7 OS=Homo sapiens GN=HSPA7 PE=5 SV=2	2	7	1	1	5	5	3	5	3	4	5	5	1	1	1	1	1	1	1	1	1	1	1	1	1	1	1	1	12.4	1.7	1.7	71.027
sp|Q9P219|DAPLE_HUMAN;tr|Q0P665|Q0P665_HUMAN;tr|G3V3S0|G3V3S0_HUMAN;tr|H0YJX5|H0YJX5_HUMAN	sp|Q9P219|DAPLE_HUMAN	2603700	1623400	1989200	2409400	1	1	1	1	2603700	1623400	1989200	2409400	11;1;1;1	11;1;1;1	11;1;1;1	sp|Q9P219|DAPLE_HUMAN Protein Daple OS=Homo sapiens GN=CCDC88C PE=1 SV=3	4	11	11	11	0	1	1	1	7	2	9	4	0	1	1	1	7	2	9	4	0	1	1	1	7	2	9	4	7.9	7.9	7.9	228.23
sp|Q5RKV6|EXOS6_HUMAN	sp|Q5RKV6|EXOS6_HUMAN	1487300	1.12415	1.51619	2377700	1	1549700	1442100	1	1487300	1742100	2186500	2377700	5	5	5	sp|Q5RKV6|EXOS6_HUMAN Exosome complex component MTR3 OS=Homo sapiens GN=EXOSC6 PE=1 SV=1	1	5	5	5	0	2	3	1	2	3	3	4	0	2	3	1	2	3	3	4	0	2	3	1	2	3	3	4	28.3	28.3	28.3	28.235
sp|Q96B26|EXOS8_HUMAN	sp|Q96B26|EXOS8_HUMAN	1561800	1199300	2055700	2307800	1	1	1	1	1561800	1199300	2055700	2307800	3	3	3	sp|Q96B26|EXOS8_HUMAN Exosome complex component RRP43 OS=Homo sapiens GN=EXOSC8 PE=1 SV=1	1	3	3	3	0	0	0	0	2	2	3	2	0	0	0	0	2	2	3	2	0	0	0	0	2	2	3	2	14.9	14.9	14.9	30.039
sp|Q8TDD1|DDX54_HUMAN;tr|F8VRX4|F8VRX4_HUMAN;tr|H0YHH7|H0YHH7_HUMAN	sp|Q8TDD1|DDX54_HUMAN;tr|F8VRX4|F8VRX4_HUMAN	1836800	1	2565400	2188500	1	1	1	1	1836800	1	2565400	2188500	10;5;1	10;5;1	10;5;1	sp|Q8TDD1|DDX54_HUMAN ATP-dependent RNA helicase DDX54 OS=Homo sapiens GN=DDX54 PE=1 SV=2;tr|F8VRX4|F8VRX4_HUMAN ATP-dependent RNA helicase DDX54 (Fragment) OS=Homo sapiens GN=DDX54 PE=1 SV=1	3	10	10	10	0	0	0	0	5	2	6	5	0	0	0	0	5	2	6	5	0	0	0	0	5	2	6	5	13.7	13.7	13.7	98.594
sp|Q9BVJ6|UT14A_HUMAN;tr|X6RJY0|X6RJY0_HUMAN;sp|Q5TAP6|UT14C_HUMAN	sp|Q9BVJ6|UT14A_HUMAN	1525500	1	2446000	2116700	1	1	1	1	1525500	1	2446000	2116700	9;4;3	9;4;3	9;4;3	sp|Q9BVJ6|UT14A_HUMAN U3 small nucleolar RNA-associated protein 14 homolog A OS=Homo sapiens GN=UTP14A PE=1 SV=1	3	9	9	9	0	0	0	0	2	1	6	7	0	0	0	0	2	1	6	7	0	0	0	0	2	1	6	7	15.4	15.4	15.4	87.977
sp|Q15024|EXOS7_HUMAN	sp|Q15024|EXOS7_HUMAN	1766700	0.99721	1.7648	2105800	1	1648500	1594800	1	1766700	1643900	2814500	2105800	4	4	4	sp|Q15024|EXOS7_HUMAN Exosome complex component RRP42 OS=Homo sapiens GN=EXOSC7 PE=1 SV=3	1	4	4	4	0	2	2	1	4	4	4	2	0	2	2	1	4	4	4	2	0	2	2	1	4	4	4	2	16.5	16.5	16.5	31.821
sp|P55265|DSRAD_HUMAN;tr|H0YCK3|H0YCK3_HUMAN	sp|P55265|DSRAD_HUMAN;tr|H0YCK3|H0YCK3_HUMAN	3145400	2481100	2469400	2083700	1	1	1	1	3145400	2481100	2469400	2083700	12;10	12;10	12;10	sp|P55265|DSRAD_HUMAN Double-stranded RNA-specific adenosine deaminase OS=Homo sapiens GN=ADAR PE=1 SV=4;tr|H0YCK3|H0YCK3_HUMAN Double-stranded RNA-specific adenosine deaminase (Fragment) OS=Homo sapiens GN=ADAR PE=1 SV=1	2	12	12	12	0	0	1	0	7	5	10	7	0	0	1	0	7	5	10	7	0	0	1	0	7	5	10	7	11.9	11.9	11.9	136.06
sp|Q14690|RRP5_HUMAN	sp|Q14690|RRP5_HUMAN	2093200	1812300	1592900	2062300	1	1	1	1	2093200	1812300	1592900	2062300	8	8	8	sp|Q14690|RRP5_HUMAN Protein RRP5 homolog OS=Homo sapiens GN=PDCD11 PE=1 SV=3	1	8	8	8	0	0	0	1	4	5	5	7	0	0	0	1	4	5	5	7	0	0	0	1	4	5	5	7	5.6	5.6	5.6	208.7
tr|F8W0G4|F8W0G4_HUMAN;tr|F8VXH9|F8VXH9_HUMAN;tr|H3BRU6|H3BRU6_HUMAN;tr|F8VZX2|F8VZX2_HUMAN;sp|Q15366|PCBP2_HUMAN;tr|F8W1G6|F8W1G6_HUMAN	tr|F8W0G4|F8W0G4_HUMAN;tr|F8VXH9|F8VXH9_HUMAN;tr|H3BRU6|H3BRU6_HUMAN;tr|F8VZX2|F8VZX2_HUMAN;sp|Q15366|PCBP2_HUMAN;tr|F8W1G6|F8W1G6_HUMAN	1	1	1	2054400	1	1	1	1	1	1	1	2054400	2;2;2;2;2;1	1;1;1;1;1;1	1;1;1;1;1;1	tr|F8W0G4|F8W0G4_HUMAN Poly(rC)-binding protein 2 (Fragment) OS=Homo sapiens GN=PCBP2 PE=1 SV=1;tr|F8VXH9|F8VXH9_HUMAN Poly(rC)-binding protein 2 (Fragment) OS=Homo sapiens GN=PCBP2 PE=1 SV=1;tr|H3BRU6|H3BRU6_HUMAN Poly(rC)-binding protein 2 (Fragment) OS=	6	2	1	1	1	1	1	1	2	2	2	1	1	1	1	1	1	1	1	1	1	1	1	1	1	1	1	1	20.9	8.2	8.2	16.637
sp|P46783|RS10_HUMAN;tr|F6U211|F6U211_HUMAN;tr|S4R435|S4R435_HUMAN	sp|P46783|RS10_HUMAN;tr|F6U211|F6U211_HUMAN;tr|S4R435|S4R435_HUMAN	1	1	1	2012400	1	1	1	1	1	1	1	2012400	1;1;1	1;1;1	1;1;1	sp|P46783|RS10_HUMAN 40S ribosomal protein S10 OS=Homo sapiens GN=RPS10 PE=1 SV=1;tr|F6U211|F6U211_HUMAN 40S ribosomal protein S10 OS=Homo sapiens GN=RPS10 PE=4 SV=1;tr|S4R435|S4R435_HUMAN Protein RPS10-NUDT3 (Fragment) OS=Homo sapiens GN=RPS10-NUDT3 PE=3	3	1	1	1	1	1	1	1	1	1	1	1	1	1	1	1	1	1	1	1	1	1	1	1	1	1	1	1	5.5	5.5	5.5	18.898
sp|Q9BQ39|DDX50_HUMAN;tr|A0A087WVC1|A0A087WVC1_HUMAN	sp|Q9BQ39|DDX50_HUMAN;tr|A0A087WVC1|A0A087WVC1_HUMAN	1242400	1349000	1882000	1961100	1	1	1	1	1242400	1349000	1882000	1961100	9;8	7;6	7;6	sp|Q9BQ39|DDX50_HUMAN ATP-dependent RNA helicase DDX50 OS=Homo sapiens GN=DDX50 PE=1 SV=1;tr|A0A087WVC1|A0A087WVC1_HUMAN ATP-dependent RNA helicase DDX50 OS=Homo sapiens GN=DDX50 PE=1 SV=1	2	9	7	7	2	2	2	2	5	3	4	6	0	0	1	0	4	2	3	5	0	0	1	0	4	2	3	5	15.6	11.9	11.9	82.564
sp|P62258|1433E_HUMAN;tr|B4DJF2|B4DJF2_HUMAN;tr|I3L3T1|I3L3T1_HUMAN;tr|K7EM20|K7EM20_HUMAN;tr|I3L0W5|I3L0W5_HUMAN	sp|P62258|1433E_HUMAN;tr|B4DJF2|B4DJF2_HUMAN;tr|I3L3T1|I3L3T1_HUMAN;tr|K7EM20|K7EM20_HUMAN	2094300	1	0.624627	1960600	1	1	2343000	1	2094300	1	1463500	1960600	4;2;2;2;1	4;2;2;2;1	2;1;1;1;1	sp|P62258|1433E_HUMAN 14-3-3 protein epsilon OS=Homo sapiens GN=YWHAE PE=1 SV=1;tr|B4DJF2|B4DJF2_HUMAN 14-3-3 protein epsilon OS=Homo sapiens GN=YWHAE PE=1 SV=1;tr|I3L3T1|I3L3T1_HUMAN 14-3-3 protein epsilon OS=Homo sapiens GN=YWHAE PE=1 SV=1;tr|K7EM20|K7EM	5	4	4	2	1	1	2	0	2	1	3	3	1	1	2	0	2	1	3	3	0	0	1	0	1	0	2	1	16.1	16.1	9	29.174
sp|Q5T3I0|GPTC4_HUMAN;tr|A0A0A0MRK1|A0A0A0MRK1_HUMAN;tr|E9PAV9|E9PAV9_HUMAN;tr|E9PPY4|E9PPY4_HUMAN;tr|F2Z3C6|F2Z3C6_HUMAN;tr|F8W895|F8W895_HUMAN	sp|Q5T3I0|GPTC4_HUMAN;tr|A0A0A0MRK1|A0A0A0MRK1_HUMAN;tr|E9PAV9|E9PAV9_HUMAN	1503700	1223900	1860100	1957400	1	1	1	1	1503700	1223900	1860100	1957400	5;4;4;2;2;2	5;4;4;2;2;2	5;4;4;2;2;2	sp|Q5T3I0|GPTC4_HUMAN G patch domain-containing protein 4 OS=Homo sapiens GN=GPATCH4 PE=1 SV=2;tr|A0A0A0MRK1|A0A0A0MRK1_HUMAN G patch domain-containing protein 4 OS=Homo sapiens GN=GPATCH4 PE=1 SV=1;tr|E9PAV9|E9PAV9_HUMAN G patch domain-containing protein	6	5	5	5	0	0	0	0	2	2	4	3	0	0	0	0	2	2	4	3	0	0	0	0	2	2	4	3	18.6	18.6	18.6	50.381
sp|Q9UJV9|DDX41_HUMAN;tr|J3KNN5|J3KNN5_HUMAN;tr|H0YA06|H0YA06_HUMAN;tr|H0Y8L8|H0Y8L8_HUMAN;tr|D6RGI7|D6RGI7_HUMAN	sp|Q9UJV9|DDX41_HUMAN;tr|J3KNN5|J3KNN5_HUMAN	1949300	1	1597500	1857800	1	1	1	1	1949300	1	1597500	1857800	8;8;1;1;1	8;8;1;1;1	8;8;1;1;1	sp|Q9UJV9|DDX41_HUMAN Probable ATP-dependent RNA helicase DDX41 OS=Homo sapiens GN=DDX41 PE=1 SV=2;tr|J3KNN5|J3KNN5_HUMAN Probable ATP-dependent RNA helicase DDX41 (Fragment) OS=Homo sapiens GN=DDX41 PE=1 SV=1	5	8	8	8	0	0	0	0	5	1	6	5	0	0	0	0	5	1	6	5	0	0	0	0	5	1	6	5	14.6	14.6	14.6	69.837
sp|Q15397|K0020_HUMAN;tr|S4R3K8|S4R3K8_HUMAN	sp|Q15397|K0020_HUMAN	1743600	1585100	3170100	1853700	1	1	1	1	1743600	1585100	3170100	1853700	9;1	9;1	9;1	sp|Q15397|K0020_HUMAN Pumilio domain-containing protein KIAA0020 OS=Homo sapiens GN=KIAA0020 PE=1 SV=3	2	9	9	9	0	0	0	0	4	3	7	5	0	0	0	0	4	3	7	5	0	0	0	0	4	3	7	5	14.4	14.4	14.4	73.584
tr|Q5JZB8|Q5JZB8_HUMAN;sp|Q9BPZ2|SPI2B_HUMAN;sp|Q99865|SPI2A_HUMAN;tr|Q5JZB7|Q5JZB7_HUMAN;tr|A0A087X074|A0A087X074_HUMAN	tr|Q5JZB8|Q5JZB8_HUMAN;sp|Q9BPZ2|SPI2B_HUMAN;sp|Q99865|SPI2A_HUMAN;tr|Q5JZB7|Q5JZB7_HUMAN;tr|A0A087X074|A0A087X074_HUMAN	1	1	1	1807200	1	1	1	1	1	1	1	1807200	2;2;2;1;1	2;2;2;1;1	2;2;2;1;1	tr|Q5JZB8|Q5JZB8_HUMAN Spindlin-2B (Fragment) OS=Homo sapiens GN=SPIN2B PE=4 SV=1;sp|Q9BPZ2|SPI2B_HUMAN Spindlin-2B OS=Homo sapiens GN=SPIN2B PE=2 SV=1;sp|Q99865|SPI2A_HUMAN Spindlin-2A OS=Homo sapiens GN=SPIN2A PE=1 SV=3;tr|Q5JZB7|Q5JZB7_HUMAN Spindlin-2B	5	2	2	2	1	1	1	1	1	1	1	1	1	1	1	1	1	1	1	1	1	1	1	1	1	1	1	1	12.1	12.1	12.1	27.811
tr|E7ETK0|E7ETK0_HUMAN;tr|A0A087WUS0|A0A087WUS0_HUMAN;sp|P62847|RS24_HUMAN	tr|E7ETK0|E7ETK0_HUMAN;tr|A0A087WUS0|A0A087WUS0_HUMAN;sp|P62847|RS24_HUMAN	1	6.69075e-07	701300	1794500	1	1494600	1	1	1	1	701300	1794500	2;2;2	2;2;2	2;2;2	tr|E7ETK0|E7ETK0_HUMAN 40S ribosomal protein S24 OS=Homo sapiens GN=RPS24 PE=1 SV=1;tr|A0A087WUS0|A0A087WUS0_HUMAN 40S ribosomal protein S24 OS=Homo sapiens GN=RPS24 PE=1 SV=1;sp|P62847|RS24_HUMAN 40S ribosomal protein S24 OS=Homo sapiens GN=RPS24 PE=1 SV=	3	2	2	2	1	2	0	0	0	0	2	2	1	2	0	0	0	0	2	2	1	2	0	0	0	0	2	2	20.6	20.6	20.6	15.197
sp|O75607|NPM3_HUMAN	sp|O75607|NPM3_HUMAN	1	1	1	1757700	1	1	1	1	1	1	1	1757700	1	1	1	sp|O75607|NPM3_HUMAN Nucleoplasmin-3 OS=Homo sapiens GN=NPM3 PE=1 SV=3	1	1	1	1	1	1	1	1	1	1	1	1	1	1	1	1	1	1	1	1	1	1	1	1	1	1	1	1	9	9	9	19.343
tr|D6RIC3|D6RIC3_HUMAN;sp|Q9Y3C1|NOP16_HUMAN;tr|A0A0C4DGU5|A0A0C4DGU5_HUMAN;tr|A0A087X2G6|A0A087X2G6_HUMAN;tr|A0A087X1T1|A0A087X1T1_HUMAN;tr|D6RC60|D6RC60_HUMAN	tr|D6RIC3|D6RIC3_HUMAN;sp|Q9Y3C1|NOP16_HUMAN;tr|A0A0C4DGU5|A0A0C4DGU5_HUMAN;tr|A0A087X2G6|A0A087X2G6_HUMAN;tr|A0A087X1T1|A0A087X1T1_HUMAN	1898000	1129400	1975000	1735300	1	1	1	1	1898000	1129400	1975000	1735300	4;4;4;4;3;1	4;4;4;4;3;1	4;4;4;4;3;1	tr|D6RIC3|D6RIC3_HUMAN Nucleolar protein 16 OS=Homo sapiens GN=NOP16 PE=1 SV=1;sp|Q9Y3C1|NOP16_HUMAN Nucleolar protein 16 OS=Homo sapiens GN=NOP16 PE=1 SV=2;tr|A0A0C4DGU5|A0A0C4DGU5_HUMAN Nucleolar protein 16 OS=Homo sapiens GN=NOP16 PE=1 SV=1;tr|A0A087X2G	6	4	4	4	0	0	0	0	3	3	4	4	0	0	0	0	3	3	4	4	0	0	0	0	3	3	4	4	28.7	28.7	28.7	17.198
sp|P55795|HNRH2_HUMAN	sp|P55795|HNRH2_HUMAN	1346400	1	1.32375	1686100	1	1	1001700	1	1346400	1	1326000	1686100	9	3	3	sp|P55795|HNRH2_HUMAN Heterogeneous nuclear ribonucleoprotein H2 OS=Homo sapiens GN=HNRNPH2 PE=1 SV=1	1	9	3	3	4	4	6	4	8	5	6	8	0	0	2	1	3	1	2	3	0	0	2	1	3	1	2	3	24.7	10.5	10.5	49.263
sp|P01625|KV402_HUMAN;sp|P06312|KV401_HUMAN;sp|P06313|KV403_HUMAN;sp|P06314|KV404_HUMAN	sp|P01625|KV402_HUMAN;sp|P06312|KV401_HUMAN;sp|P06313|KV403_HUMAN;sp|P06314|KV404_HUMAN	1	1	1	1651400	1	1	1	1	1	1	1	1651400	1;1;1;1	1;1;1;1	1;1;1;1	sp|P01625|KV402_HUMAN Ig kappa chain V-IV region Len OS=Homo sapiens PE=1 SV=2;sp|P06312|KV401_HUMAN Ig kappa chain V-IV region (Fragment) OS=Homo sapiens GN=IGKV4-1 PE=4 SV=1;sp|P06313|KV403_HUMAN Ig kappa chain V-IV region JI OS=Homo sapiens PE=4 SV=1;sp	4	1	1	1	0	0	0	1	1	1	1	1	0	0	0	1	1	1	1	1	0	0	0	1	1	1	1	1	7.9	7.9	7.9	12.64
sp|Q13242|SRSF9_HUMAN;tr|S4R3G0|S4R3G0_HUMAN;tr|H0YIB4|H0YIB4_HUMAN	sp|Q13242|SRSF9_HUMAN;tr|S4R3G0|S4R3G0_HUMAN;tr|H0YIB4|H0YIB4_HUMAN	1	1	1	1586100	1	1	1	1	1	1	1	1586100	4;4;3	3;3;3	3;3;3	sp|Q13242|SRSF9_HUMAN Serine/arginine-rich splicing factor 9 OS=Homo sapiens GN=SRSF9 PE=1 SV=1;tr|S4R3G0|S4R3G0_HUMAN Serine/arginine-rich-splicing factor 9 OS=Homo sapiens GN=SRSF9 PE=1 SV=1;tr|H0YIB4|H0YIB4_HUMAN Serine/arginine-rich-splicing factor 9 (	3	4	3	3	1	1	1	2	0	2	1	3	1	1	1	1	0	1	1	3	1	1	1	1	0	1	1	3	14.5	11.3	11.3	25.542
sp|Q92769|HDAC2_HUMAN;tr|E5RFI6|E5RFI6_HUMAN;tr|E5RJ04|E5RJ04_HUMAN;tr|E5RGV4|E5RGV4_HUMAN;tr|E5RHE7|E5RHE7_HUMAN;tr|E5RH52|E5RH52_HUMAN;tr|E5RG37|E5RG37_HUMAN;tr|E5RFP9|E5RFP9_HUMAN;tr|H3BM24|H3BM24_HUMAN;tr|E5RK19|E5RK19_HUMAN;tr|E7ESJ6|E7ESJ6_HUMAN;sp|O15379|HDAC3_HUMAN	sp|Q92769|HDAC2_HUMAN	0.92962	2498000	0.678489	1555000	2097200	1	2588400	1	1949600	2498000	1756200	1555000	7;3;3;3;3;3;3;3;3;2;1;1	3;1;1;1;1;1;1;1;1;1;0;0	3;1;1;1;1;1;1;1;1;1;0;0	sp|Q92769|HDAC2_HUMAN Histone deacetylase 2 OS=Homo sapiens GN=HDAC2 PE=1 SV=2	12	7	3	3	4	2	5	3	5	6	5	5	2	0	2	1	3	3	3	2	2	0	2	1	3	3	3	2	18.4	9.2	9.2	55.364
sp|Q8IWX8|CHERP_HUMAN;tr|J3QK89|J3QK89_HUMAN	sp|Q8IWX8|CHERP_HUMAN;tr|J3QK89|J3QK89_HUMAN	1795200	1235500	0.773591	1501700	1	1	1594900	1	1795200	1235500	1233800	1501700	6;6	6;6	6;6	sp|Q8IWX8|CHERP_HUMAN Calcium homeostasis endoplasmic reticulum protein OS=Homo sapiens GN=CHERP PE=1 SV=3;tr|J3QK89|J3QK89_HUMAN Calcium homeostasis endoplasmic reticulum protein OS=Homo sapiens GN=CHERP PE=1 SV=1	2	6	6	6	0	1	3	2	5	4	3	2	0	1	3	2	5	4	3	2	0	1	3	2	5	4	3	2	7.5	7.5	7.5	103.7
sp|Q5SY16|NOL9_HUMAN	sp|Q5SY16|NOL9_HUMAN	2199700	2307300	1.15036	1490500	1	1	2040400	1	2199700	2307300	2347200	1490500	5	5	5	sp|Q5SY16|NOL9_HUMAN Polynucleotide 5-hydroxyl-kinase NOL9 OS=Homo sapiens GN=NOL9 PE=1 SV=1	1	5	5	5	0	0	2	0	3	3	4	3	0	0	2	0	3	3	4	3	0	0	2	0	3	3	4	3	9.4	9.4	9.4	79.322
sp|P54132|BLM_HUMAN;tr|H0YNU5|H0YNU5_HUMAN;tr|H0YLV8|H0YLV8_HUMAN	sp|P54132|BLM_HUMAN;tr|H0YNU5|H0YNU5_HUMAN	2037800	1346100	1308700	1463800	1	1	1	1	2037800	1346100	1308700	1463800	8;8;1	8;8;1	8;8;1	sp|P54132|BLM_HUMAN Bloom syndrome protein OS=Homo sapiens GN=BLM PE=1 SV=1;tr|H0YNU5|H0YNU5_HUMAN Bloom syndrome protein OS=Homo sapiens GN=BLM PE=1 SV=1	3	8	8	8	0	1	1	1	5	2	3	4	0	1	1	1	5	2	3	4	0	1	1	1	5	2	3	4	5.8	5.8	5.8	159
sp|P52292|IMA1_HUMAN;tr|J3QLL0|J3QLL0_HUMAN;tr|J3KS65|J3KS65_HUMAN	sp|P52292|IMA1_HUMAN	1930200	1914700	0.970222	1408400	1	1	1736200	1	1930200	1914700	1684500	1408400	6;2;2	6;2;2	6;2;2	sp|P52292|IMA1_HUMAN Importin subunit alpha-1 OS=Homo sapiens GN=KPNA2 PE=1 SV=1	3	6	6	6	1	1	3	1	3	3	3	4	1	1	3	1	3	3	3	4	1	1	3	1	3	3	3	4	14.6	14.6	14.6	57.861
tr|C9JY20|C9JY20_HUMAN	tr|C9JY20|C9JY20_HUMAN	1	1	1	1401700	1	1	1	1	1	1	1	1401700	1	1	1	tr|C9JY20|C9JY20_HUMAN Fragile X mental retardation syndrome-related protein 1 (Fragment) OS=Homo sapiens GN=FXR1 PE=1 SV=1	1	1	1	1	0	0	0	1	1	1	1	1	0	0	0	1	1	1	1	1	0	0	0	1	1	1	1	1	5.7	5.7	5.7	14.236
sp|Q12874|SF3A3_HUMAN	sp|Q12874|SF3A3_HUMAN	1806800	1691300	0.73822	1332700	1	1	2020400	1	1806800	1691300	1491500	1332700	4	4	4	sp|Q12874|SF3A3_HUMAN Splicing factor 3A subunit 3 OS=Homo sapiens GN=SF3A3 PE=1 SV=1	1	4	4	4	1	1	2	0	3	3	2	3	1	1	2	0	3	3	2	3	1	1	2	0	3	3	2	3	10.8	10.8	10.8	58.848
tr|F8VQE1|F8VQE1_HUMAN;sp|Q9UHB6|LIMA1_HUMAN;tr|F8VS07|F8VS07_HUMAN;tr|F8VRN8|F8VRN8_HUMAN	tr|F8VQE1|F8VQE1_HUMAN;sp|Q9UHB6|LIMA1_HUMAN;tr|F8VS07|F8VS07_HUMAN	2246100	2032200	1866500	1306200	1	1	1	1	2246100	2032200	1866500	1306200	6;6;5;2	6;6;5;2	6;6;5;2	tr|F8VQE1|F8VQE1_HUMAN LIM domain and actin-binding protein 1 OS=Homo sapiens GN=LIMA1 PE=1 SV=1;sp|Q9UHB6|LIMA1_HUMAN LIM domain and actin-binding protein 1 OS=Homo sapiens GN=LIMA1 PE=1 SV=1;tr|F8VS07|F8VS07_HUMAN LIM domain and actin-binding protein 1 O	4	6	6	6	1	1	1	2	3	4	5	2	1	1	1	2	3	4	5	2	1	1	1	2	3	4	5	2	11.7	11.7	11.7	66.99
sp|Q96GM8|TOE1_HUMAN	sp|Q96GM8|TOE1_HUMAN	1	1	1094300	1305100	1	1	1	1	1	1	1094300	1305100	4	4	4	sp|Q96GM8|TOE1_HUMAN Target of EGR1 protein 1 OS=Homo sapiens GN=TOE1 PE=1 SV=1	1	4	4	4	0	0	0	0	1	1	3	3	0	0	0	0	1	1	3	3	0	0	0	0	1	1	3	3	12.5	12.5	12.5	56.547
tr|H0YB22|H0YB22_HUMAN;tr|E5RH77|E5RH77_HUMAN;sp|P62263|RS14_HUMAN	tr|H0YB22|H0YB22_HUMAN;tr|E5RH77|E5RH77_HUMAN;sp|P62263|RS14_HUMAN	1	1	1488200	1290900	1	1	1	1	1	1	1488200	1290900	2;2;2	2;2;2	2;2;2	tr|H0YB22|H0YB22_HUMAN 40S ribosomal protein S14 (Fragment) OS=Homo sapiens GN=RPS14 PE=1 SV=1;tr|E5RH77|E5RH77_HUMAN 40S ribosomal protein S14 OS=Homo sapiens GN=RPS14 PE=1 SV=1;sp|P62263|RS14_HUMAN 40S ribosomal protein S14 OS=Homo sapiens GN=RPS14 PE=1	3	2	2	2	1	1	1	1	1	1	2	2	1	1	1	1	1	1	2	2	1	1	1	1	1	1	2	2	26.7	26.7	26.7	12.832
sp|Q86W42|THOC6_HUMAN	sp|Q86W42|THOC6_HUMAN	766200	1	1	1281800	1	1	1	1	766200	1	1	1281800	3	3	3	sp|Q86W42|THOC6_HUMAN THO complex subunit 6 homolog OS=Homo sapiens GN=THOC6 PE=1 SV=1	1	3	3	3	0	0	0	1	2	1	1	3	0	0	0	1	2	1	1	3	0	0	0	1	2	1	1	3	13.5	13.5	13.5	37.535
sp|Q9BU76|MMTA2_HUMAN	sp|Q9BU76|MMTA2_HUMAN	1	895210	1	1243500	1	1	1	1	1	895210	1	1243500	2	2	2	sp|Q9BU76|MMTA2_HUMAN Multiple myeloma tumor-associated protein 2 OS=Homo sapiens GN=MMTAG2 PE=1 SV=1	1	2	2	2	0	0	0	1	1	2	1	2	0	0	0	1	1	2	1	2	0	0	0	1	1	2	1	2	8.7	8.7	8.7	29.411
tr|E9PQ56|E9PQ56_HUMAN;tr|H0YEM1|H0YEM1_HUMAN;sp|Q9UHX1|PUF60_HUMAN;tr|E9PN18|E9PN18_HUMAN;tr|E9PMU7|E9PMU7_HUMAN;tr|H0YCP8|H0YCP8_HUMAN;tr|E9PL19|E9PL19_HUMAN	tr|E9PQ56|E9PQ56_HUMAN;tr|H0YEM1|H0YEM1_HUMAN;sp|Q9UHX1|PUF60_HUMAN;tr|E9PN18|E9PN18_HUMAN;tr|E9PMU7|E9PMU7_HUMAN;tr|H0YCP8|H0YCP8_HUMAN	1	1	1	1236400	1	1	1	1	1	1	1	1236400	4;4;4;3;2;2;1	4;4;4;3;2;2;1	4;4;4;3;2;2;1	tr|E9PQ56|E9PQ56_HUMAN Poly(U)-binding-splicing factor PUF60 (Fragment) OS=Homo sapiens GN=PUF60 PE=1 SV=5;tr|H0YEM1|H0YEM1_HUMAN Poly(U)-binding-splicing factor PUF60 (Fragment) OS=Homo sapiens GN=PUF60 PE=1 SV=1;sp|Q9UHX1|PUF60_HUMAN Poly(U)-binding-spli	7	4	4	4	0	0	1	1	1	0	1	4	0	0	1	1	1	0	1	4	0	0	1	1	1	0	1	4	17.6	17.6	17.6	34.529
tr|A0A0B4J2E5|A0A0B4J2E5_HUMAN;sp|Q15269|PWP2_HUMAN;tr|C9J544|C9J544_HUMAN;tr|A0A096LPI6|A0A096LPI6_HUMAN	tr|A0A0B4J2E5|A0A0B4J2E5_HUMAN;sp|Q15269|PWP2_HUMAN	1	1	1	1234700	1	1	1	1	1	1	1	1234700	3;3;1;1	3;3;1;1	3;3;1;1	tr|A0A0B4J2E5|A0A0B4J2E5_HUMAN Uncharacterized protein OS=Homo sapiens PE=1 SV=1;sp|Q15269|PWP2_HUMAN Periodic tryptophan protein 2 homolog OS=Homo sapiens GN=PWP2 PE=1 SV=2	4	3	3	3	0	0	0	0	0	1	1	3	0	0	0	0	0	1	1	3	0	0	0	0	0	1	1	3	3.7	3.7	3.7	102.45
tr|M0R3F1|M0R3F1_HUMAN;tr|A0A0A0MRA5|A0A0A0MRA5_HUMAN;tr|B7Z4B8|B7Z4B8_HUMAN;sp|Q9BUJ2|HNRL1_HUMAN;tr|M0QYZ0|M0QYZ0_HUMAN;tr|M0QYM5|M0QYM5_HUMAN;tr|M0QYI8|M0QYI8_HUMAN	tr|M0R3F1|M0R3F1_HUMAN;tr|A0A0A0MRA5|A0A0A0MRA5_HUMAN;tr|B7Z4B8|B7Z4B8_HUMAN;sp|Q9BUJ2|HNRL1_HUMAN;tr|M0QYZ0|M0QYZ0_HUMAN	1489400	1	1640800	1195300	1	1	1	1	1489400	1	1640800	1195300	4;4;4;4;3;1;1	4;4;4;4;3;1;1	4;4;4;4;3;1;1	tr|M0R3F1|M0R3F1_HUMAN Heterogeneous nuclear ribonucleoprotein U-like protein 1 (Fragment) OS=Homo sapiens GN=HNRNPUL1 PE=1 SV=1;tr|A0A0A0MRA5|A0A0A0MRA5_HUMAN Heterogeneous nuclear ribonucleoprotein U-like protein 1 OS=Homo sapiens GN=HNRNPUL1 PE=1 SV=1;t	7	4	4	4	1	0	0	1	3	1	3	3	1	0	0	1	3	1	3	3	1	0	0	1	3	1	3	3	8.6	8.6	8.6	71.611
sp|P50991|TCPD_HUMAN	sp|P50991|TCPD_HUMAN	1274700	1	7.95608e-07	1157900	1	1	1256900	1	1274700	1	1	1157900	5	5	5	sp|P50991|TCPD_HUMAN T-complex protein 1 subunit delta OS=Homo sapiens GN=CCT4 PE=1 SV=4	1	5	5	5	1	1	3	1	2	1	1	4	1	1	3	1	2	1	1	4	1	1	3	1	2	1	1	4	10.8	10.8	10.8	57.924
sp|P62854|RS26_HUMAN;sp|Q5JNZ5|RS26L_HUMAN	sp|P62854|RS26_HUMAN;sp|Q5JNZ5|RS26L_HUMAN	1	1	725760	1135600	1	1	1	1	1	1	725760	1135600	2;1	2;1	2;1	sp|P62854|RS26_HUMAN 40S ribosomal protein S26 OS=Homo sapiens GN=RPS26 PE=1 SV=3;sp|Q5JNZ5|RS26L_HUMAN Putative 40S ribosomal protein S26-like 1 OS=Homo sapiens GN=RPS26P11 PE=5 SV=1	2	2	2	2	1	1	0	0	1	1	2	2	1	1	0	0	1	1	2	2	1	1	0	0	1	1	2	2	20.9	20.9	20.9	13.015
sp|Q14978|NOLC1_HUMAN;tr|A0A0A0MRM9|A0A0A0MRM9_HUMAN;tr|S4R402|S4R402_HUMAN;tr|S4R341|S4R341_HUMAN;tr|S4R349|S4R349_HUMAN	sp|Q14978|NOLC1_HUMAN;tr|A0A0A0MRM9|A0A0A0MRM9_HUMAN;tr|S4R402|S4R402_HUMAN;tr|S4R341|S4R341_HUMAN;tr|S4R349|S4R349_HUMAN	1	1	1	1125400	1	1	1	1	1	1	1	1125400	2;2;1;1;1	2;2;1;1;1	2;2;1;1;1	sp|Q14978|NOLC1_HUMAN Nucleolar and coiled-body phosphoprotein 1 OS=Homo sapiens GN=NOLC1 PE=1 SV=2;tr|A0A0A0MRM9|A0A0A0MRM9_HUMAN Nucleolar and coiled-body phosphoprotein 1 (Fragment) OS=Homo sapiens GN=NOLC1 PE=1 SV=1;tr|S4R402|S4R402_HUMAN Nucleolar and	5	2	2	2	0	0	0	0	0	0	0	2	0	0	0	0	0	0	0	2	0	0	0	0	0	0	0	2	2.7	2.7	2.7	73.602
tr|F8VPF3|F8VPF3_HUMAN;tr|F8W1R7|F8W1R7_HUMAN;sp|P60660|MYL6_HUMAN;tr|J3KND3|J3KND3_HUMAN;tr|G8JLA2|G8JLA2_HUMAN;tr|G3V1V0|G3V1V0_HUMAN;tr|B7Z6Z4|B7Z6Z4_HUMAN;tr|G3V1Y7|G3V1Y7_HUMAN;tr|F8W180|F8W180_HUMAN;tr|F8VZU9|F8VZU9_HUMAN;tr|F8VXL3|F8VXL3_HUMAN;tr|H0YI43|H0YI43_HUMAN;tr|F8W1I5|F8W1I5_HUMAN;sp|P14649|MYL6B_HUMAN	tr|F8VPF3|F8VPF3_HUMAN;tr|F8W1R7|F8W1R7_HUMAN;sp|P60660|MYL6_HUMAN;tr|J3KND3|J3KND3_HUMAN;tr|G8JLA2|G8JLA2_HUMAN;tr|G3V1V0|G3V1V0_HUMAN;tr|B7Z6Z4|B7Z6Z4_HUMAN;tr|G3V1Y7|G3V1Y7_HUMAN;tr|F8W180|F8W180_HUMAN;tr|F8VZU9|F8VZU9_HUMAN	1547200	1	1101700	1096800	1	1	1	1	1547200	1	1101700	1096800	4;4;4;4;4;4;4;3;3;3;1;1;1;1	4;4;4;4;4;4;4;3;3;3;1;1;1;1	4;4;4;4;4;4;4;3;3;3;1;1;1;1	tr|F8VPF3|F8VPF3_HUMAN Myosin light polypeptide 6 (Fragment) OS=Homo sapiens GN=MYL6 PE=1 SV=1;tr|F8W1R7|F8W1R7_HUMAN Myosin light polypeptide 6 OS=Homo sapiens GN=MYL6 PE=1 SV=1;sp|P60660|MYL6_HUMAN Myosin light polypeptide 6 OS=Homo sapiens GN=MYL6 PE=1	14	4	4	4	0	0	1	1	3	2	2	2	0	0	1	1	3	2	2	2	0	0	1	1	3	2	2	2	40.8	40.8	40.8	14.436
sp|Q8WUA2|PPIL4_HUMAN	sp|Q8WUA2|PPIL4_HUMAN	1707300	2188200	7.82044e-07	1080500	1	1	1278700	1	1707300	2188200	1	1080500	4	4	4	sp|Q8WUA2|PPIL4_HUMAN Peptidyl-prolyl cis-trans isomerase-like 4 OS=Homo sapiens GN=PPIL4 PE=1 SV=1	1	4	4	4	1	0	2	2	2	2	3	2	1	0	2	2	2	2	3	2	1	0	2	2	2	2	3	2	11.4	11.4	11.4	57.224
sp|O75131|CPNE3_HUMAN;tr|A0A087WUS8|A0A087WUS8_HUMAN;tr|A0A087WXR6|A0A087WXR6_HUMAN;tr|E5RHZ0|E5RHZ0_HUMAN;tr|A0A087WYQ3|A0A087WYQ3_HUMAN;sp|Q96FN4|CPNE2_HUMAN;tr|E7ENV7|E7ENV7_HUMAN;sp|Q8IYJ1|CPNE9_HUMAN;sp|Q96A23|CPNE4_HUMAN;sp|O95741|CPNE6_HUMAN;sp|Q86YQ8|CPNE8_HUMAN;sp|Q9HCH3|CPNE5_HUMAN;sp|Q9UBL6|CPNE7_HUMAN	sp|O75131|CPNE3_HUMAN	1223400	1372400	1093000	1051900	1	1	1	1	1223400	1372400	1093000	1051900	4;1;1;1;1;1;1;1;1;1;1;1;1	4;1;1;1;1;1;1;1;1;1;1;1;1	4;1;1;1;1;1;1;1;1;1;1;1;1	sp|O75131|CPNE3_HUMAN Copine-3 OS=Homo sapiens GN=CPNE3 PE=1 SV=1	13	4	4	4	0	0	1	1	4	2	3	3	0	0	1	1	4	2	3	3	0	0	1	1	4	2	3	3	8	8	8	60.13
tr|A0A0A0MR02|A0A0A0MR02_HUMAN;sp|P45880|VDAC2_HUMAN;tr|Q5JSD2|Q5JSD2_HUMAN;tr|Q5JSD1|Q5JSD1_HUMAN	tr|A0A0A0MR02|A0A0A0MR02_HUMAN;sp|P45880|VDAC2_HUMAN	2451000	1490300	1.23817	1047800	1	1	1168500	1	2451000	1490300	1446800	1047800	3;3;1;1	3;3;1;1	3;3;1;1	tr|A0A0A0MR02|A0A0A0MR02_HUMAN Voltage-dependent anion-selective channel protein 2 (Fragment) OS=Homo sapiens GN=VDAC2 PE=1 SV=1;sp|P45880|VDAC2_HUMAN Voltage-dependent anion-selective channel protein 2 OS=Homo sapiens GN=VDAC2 PE=1 SV=2	4	3	3	3	0	0	2	1	2	2	3	2	0	0	2	1	2	2	3	2	0	0	2	1	2	2	3	2	14.2	14.2	14.2	30.348
tr|X6R700|X6R700_HUMAN;sp|Q9Y3Y2|CHTOP_HUMAN;tr|A0A087X1B7|A0A087X1B7_HUMAN;tr|Q5T7Y7|Q5T7Y7_HUMAN	tr|X6R700|X6R700_HUMAN;sp|Q9Y3Y2|CHTOP_HUMAN;tr|A0A087X1B7|A0A087X1B7_HUMAN;tr|Q5T7Y7|Q5T7Y7_HUMAN	1	1	1496200	1030800	1	1	1	1	1	1	1496200	1030800	2;2;1;1	2;2;1;1	2;2;1;1	tr|X6R700|X6R700_HUMAN Chromatin target of PRMT1 protein OS=Homo sapiens GN=CHTOP PE=1 SV=1;sp|Q9Y3Y2|CHTOP_HUMAN Chromatin target of PRMT1 protein OS=Homo sapiens GN=CHTOP PE=1 SV=2;tr|A0A087X1B7|A0A087X1B7_HUMAN Chromatin target of PRMT1 protein OS=Homo	4	2	2	2	0	1	0	0	2	0	2	2	0	1	0	0	2	0	2	2	0	1	0	0	2	0	2	2	13	13	13	23.661
tr|B1AMU3|B1AMU3_HUMAN;sp|Q9Y3B2|EXOS1_HUMAN;tr|R4GNH9|R4GNH9_HUMAN;tr|R4GMQ7|R4GMQ7_HUMAN;tr|B1AMU7|B1AMU7_HUMAN;tr|B1AMU4|B1AMU4_HUMAN	tr|B1AMU3|B1AMU3_HUMAN;sp|Q9Y3B2|EXOS1_HUMAN;tr|R4GNH9|R4GNH9_HUMAN;tr|R4GMQ7|R4GMQ7_HUMAN;tr|B1AMU7|B1AMU7_HUMAN;tr|B1AMU4|B1AMU4_HUMAN	1	1	1	1018400	1	1	1	1	1	1	1	1018400	2;2;1;1;1;1	2;2;1;1;1;1	2;2;1;1;1;1	tr|B1AMU3|B1AMU3_HUMAN Exosome complex component CSL4 OS=Homo sapiens GN=EXOSC1 PE=1 SV=1;sp|Q9Y3B2|EXOS1_HUMAN Exosome complex component CSL4 OS=Homo sapiens GN=EXOSC1 PE=1 SV=1;tr|R4GNH9|R4GNH9_HUMAN Exosome complex component CSL4 OS=Homo sapiens GN=EXOS	6	2	2	2	0	0	0	0	2	1	1	2	0	0	0	0	2	1	1	2	0	0	0	0	2	1	1	2	13.5	13.5	13.5	18.816
tr|A0A0A0MS51|A0A0A0MS51_HUMAN;tr|A0A0A0MT01|A0A0A0MT01_HUMAN;sp|P06396|GELS_HUMAN;CON__Q3SX14;tr|Q5T0H9|Q5T0H9_HUMAN;tr|Q5T0H8|Q5T0H8_HUMAN;tr|Q5T0I1|Q5T0I1_HUMAN;tr|Q5T0I0|Q5T0I0_HUMAN	tr|A0A0A0MS51|A0A0A0MS51_HUMAN;tr|A0A0A0MT01|A0A0A0MT01_HUMAN;sp|P06396|GELS_HUMAN;CON__Q3SX14;tr|Q5T0H9|Q5T0H9_HUMAN	2122500	1873000	1022700	1017100	1	1	1	1	2122500	1873000	1022700	1017100	7;7;7;5;4;3;2;2	7;7;7;5;4;3;2;2	7;7;7;5;4;3;2;2	tr|A0A0A0MS51|A0A0A0MS51_HUMAN Gelsolin OS=Homo sapiens GN=GSN PE=1 SV=1;tr|A0A0A0MT01|A0A0A0MT01_HUMAN Gelsolin OS=Homo sapiens GN=GSN PE=1 SV=1;sp|P06396|GELS_HUMAN Gelsolin OS=Homo sapiens GN=GSN PE=1 SV=1;;tr|Q5T0H9|Q5T0H9_HUMAN Gelsolin OS=Homo sapien	8	7	7	7	0	0	1	0	6	3	4	2	0	0	1	0	6	3	4	2	0	0	1	0	6	3	4	2	12	12	12	82.525
sp|P42285|SK2L2_HUMAN;tr|H0YAC4|H0YAC4_HUMAN;tr|H0Y8U3|H0Y8U3_HUMAN	sp|P42285|SK2L2_HUMAN	781010	1	1437000	971980	1	1	1	1	781010	1	1437000	971980	5;1;1	5;1;1	5;1;1	sp|P42285|SK2L2_HUMAN Superkiller viralicidic activity 2-like 2 OS=Homo sapiens GN=SKIV2L2 PE=1 SV=3	3	5	5	5	0	0	0	0	2	1	5	3	0	0	0	0	2	1	5	3	0	0	0	0	2	1	5	3	5.2	5.2	5.2	117.8
sp|Q9H0S4|DDX47_HUMAN;tr|F5H1N9|F5H1N9_HUMAN	sp|Q9H0S4|DDX47_HUMAN	1	1	677460	971720	1	1	1	1	1	1	677460	971720	3;1	3;1	3;1	sp|Q9H0S4|DDX47_HUMAN Probable ATP-dependent RNA helicase DDX47 OS=Homo sapiens GN=DDX47 PE=1 SV=1	2	3	3	3	0	0	0	0	1	1	2	3	0	0	0	0	1	1	2	3	0	0	0	0	1	1	2	3	7	7	7	50.646
sp|Q13243|SRSF5_HUMAN;tr|B4DJK0|B4DJK0_HUMAN;tr|B4DUA4|B4DUA4_HUMAN;tr|G3V5K8|G3V5K8_HUMAN	sp|Q13243|SRSF5_HUMAN	1	1	1284000	898490	1	1	1	1	1	1	1284000	898490	5;2;2;1	4;1;1;1	4;1;1;1	sp|Q13243|SRSF5_HUMAN Serine/arginine-rich splicing factor 5 OS=Homo sapiens GN=SRSF5 PE=1 SV=1	4	5	4	4	1	1	1	2	1	2	3	4	0	0	0	1	1	1	2	3	0	0	0	1	1	1	2	3	20.6	17.3	17.3	31.263
sp|Q9H0A0|NAT10_HUMAN;tr|E9PJN6|E9PJN6_HUMAN;tr|E9PMU0|E9PMU0_HUMAN;tr|A0A087WV29|A0A087WV29_HUMAN	sp|Q9H0A0|NAT10_HUMAN	1	1	567200	885760	1	1	1	1	1	1	567200	885760	3;1;1;1	3;1;1;1	3;1;1;1	sp|Q9H0A0|NAT10_HUMAN N-acetyltransferase 10 OS=Homo sapiens GN=NAT10 PE=1 SV=2	4	3	3	3	0	0	0	0	1	0	3	2	0	0	0	0	1	0	3	2	0	0	0	0	1	0	3	2	3.3	3.3	3.3	115.73
sp|Q8WUD4|CCD12_HUMAN;tr|G3V3A0|G3V3A0_HUMAN	sp|Q8WUD4|CCD12_HUMAN;tr|G3V3A0|G3V3A0_HUMAN	1	1	1	878970	1	1	1	1	1	1	1	878970	1;1	1;1	1;1	sp|Q8WUD4|CCD12_HUMAN Coiled-coil domain-containing protein 12 OS=Homo sapiens GN=CCDC12 PE=1 SV=1;tr|G3V3A0|G3V3A0_HUMAN Alpha-1-antichymotrypsin OS=Homo sapiens GN=SERPINA3 PE=1 SV=1	2	1	1	1	0	0	0	0	0	0	1	1	0	0	0	0	0	0	1	1	0	0	0	0	0	0	1	1	11.4	11.4	11.4	19.181
tr|F5GWX5|F5GWX5_HUMAN;sp|Q14839|CHD4_HUMAN;tr|A0A0C4DGG9|A0A0C4DGG9_HUMAN;tr|K7EMY3|K7EMY3_HUMAN;sp|Q8TDI0|CHD5_HUMAN;tr|F2Z2R5|F2Z2R5_HUMAN;sp|Q12873|CHD3_HUMAN;tr|F5H6N4|F5H6N4_HUMAN	tr|F5GWX5|F5GWX5_HUMAN;sp|Q14839|CHD4_HUMAN;tr|A0A0C4DGG9|A0A0C4DGG9_HUMAN;tr|K7EMY3|K7EMY3_HUMAN;sp|Q8TDI0|CHD5_HUMAN	1141100	729010	679820	872780	1	1	1	1	1141100	729010	679820	872780	5;5;5;3;3;2;2;1	5;5;5;3;3;2;2;1	5;5;5;3;3;2;2;1	tr|F5GWX5|F5GWX5_HUMAN Chromodomain-helicase-DNA-binding protein 4 OS=Homo sapiens GN=CHD4 PE=1 SV=1;sp|Q14839|CHD4_HUMAN Chromodomain-helicase-DNA-binding protein 4 OS=Homo sapiens GN=CHD4 PE=1 SV=2;tr|A0A0C4DGG9|A0A0C4DGG9_HUMAN Chromodomain-helicase-DNA	8	5	5	5	0	0	1	0	4	2	2	3	0	0	1	0	4	2	2	3	0	0	1	0	4	2	2	3	2.7	2.7	2.7	217.1
tr|H0Y4R1|H0Y4R1_HUMAN;sp|P12268|IMDH2_HUMAN;tr|E7ETK5|E7ETK5_HUMAN	tr|H0Y4R1|H0Y4R1_HUMAN;sp|P12268|IMDH2_HUMAN	1	1	1	848680	1	1	1	1	1	1	1	848680	3;3;1	3;3;1	3;3;1	tr|H0Y4R1|H0Y4R1_HUMAN Inosine-5-monophosphate dehydrogenase 2 (Fragment) OS=Homo sapiens GN=IMPDH2 PE=1 SV=1;sp|P12268|IMDH2_HUMAN Inosine-5-monophosphate dehydrogenase 2 OS=Homo sapiens GN=IMPDH2 PE=1 SV=2	3	3	3	3	0	0	0	0	1	0	1	2	0	0	0	0	1	0	1	2	0	0	0	0	1	0	1	2	4.7	4.7	4.7	97.643
tr|E9PDF6|E9PDF6_HUMAN;sp|O43795|MYO1B_HUMAN;tr|H7C2Y7|H7C2Y7_HUMAN;tr|C9JYW1|C9JYW1_HUMAN;tr|E7EQD9|E7EQD9_HUMAN;sp|Q9UBC5|MYO1A_HUMAN	tr|E9PDF6|E9PDF6_HUMAN;sp|O43795|MYO1B_HUMAN	1677400	1457100	921140	846850	1	1	1	1	1677400	1457100	921140	846850	7;7;3;1;1;1	7;7;3;1;1;1	7;7;3;1;1;1	tr|E9PDF6|E9PDF6_HUMAN Unconventional myosin-Ib OS=Homo sapiens GN=MYO1B PE=1 SV=1;sp|O43795|MYO1B_HUMAN Unconventional myosin-Ib OS=Homo sapiens GN=MYO1B PE=1 SV=3	6	7	7	7	0	0	1	0	6	2	2	3	0	0	1	0	6	2	2	3	0	0	1	0	6	2	2	3	7.6	7.6	7.6	128.48
tr|A0A087X121|A0A087X121_HUMAN;sp|Q9Y2R4|DDX52_HUMAN	tr|A0A087X121|A0A087X121_HUMAN;sp|Q9Y2R4|DDX52_HUMAN	1	1	1	845610	1	1	1	1	1	1	1	845610	1;1	1;1	1;1	tr|A0A087X121|A0A087X121_HUMAN Probable ATP-dependent RNA helicase DDX52 (Fragment) OS=Homo sapiens GN=DDX52 PE=1 SV=1;sp|Q9Y2R4|DDX52_HUMAN Probable ATP-dependent RNA helicase DDX52 OS=Homo sapiens GN=DDX52 PE=1 SV=3	2	1	1	1	0	0	0	0	1	0	1	1	0	0	0	0	1	0	1	1	0	0	0	0	1	0	1	1	12.2	12.2	12.2	12.887
tr|A0A0A0MRR7|A0A0A0MRR7_HUMAN;sp|P09234|RU1C_HUMAN;tr|Q5TAL2|Q5TAL2_HUMAN	tr|A0A0A0MRR7|A0A0A0MRR7_HUMAN;sp|P09234|RU1C_HUMAN;tr|Q5TAL2|Q5TAL2_HUMAN	1	1	1	832780	1	1	1	1	1	1	1	832780	2;2;1	2;2;1	2;2;1	tr|A0A0A0MRR7|A0A0A0MRR7_HUMAN U1 small nuclear ribonucleoprotein C OS=Homo sapiens GN=SNRPC PE=1 SV=1;sp|P09234|RU1C_HUMAN U1 small nuclear ribonucleoprotein C OS=Homo sapiens GN=SNRPC PE=1 SV=1;tr|Q5TAL2|Q5TAL2_HUMAN U1 small nuclear ribonucleoprotein C	3	2	2	2	0	0	2	1	0	1	1	1	0	0	2	1	0	1	1	1	0	0	2	1	0	1	1	1	4.8	4.8	4.8	46.886
sp|Q5T280|CI114_HUMAN;tr|R4GNG4|R4GNG4_HUMAN;tr|A0A087WYA7|A0A087WYA7_HUMAN	sp|Q5T280|CI114_HUMAN	1	1	1	815370	1	1	1	1	1	1	1	815370	3;1;1	3;1;1	3;1;1	sp|Q5T280|CI114_HUMAN Putative methyltransferase C9orf114 OS=Homo sapiens GN=C9orf114 PE=1 SV=3	3	3	3	3	0	0	0	0	1	0	1	3	0	0	0	0	1	0	1	3	0	0	0	0	1	0	1	3	9.6	9.6	9.6	42.008
tr|K7ENG2|K7ENG2_HUMAN;sp|P26368|U2AF2_HUMAN	tr|K7ENG2|K7ENG2_HUMAN;sp|P26368|U2AF2_HUMAN	727550	1	867160	804610	1	1	1	1	727550	1	867160	804610	4;4	4;4	4;4	tr|K7ENG2|K7ENG2_HUMAN Splicing factor U2AF 65 kDa subunit OS=Homo sapiens GN=U2AF2 PE=1 SV=1;sp|P26368|U2AF2_HUMAN Splicing factor U2AF 65 kDa subunit OS=Homo sapiens GN=U2AF2 PE=1 SV=4	2	4	4	4	1	1	0	2	2	1	3	2	1	1	0	2	2	1	3	2	1	1	0	2	2	1	3	2	17.9	17.9	17.9	33.901
tr|E9PS41|E9PS41_HUMAN;sp|Q6RFH5|WDR74_HUMAN	tr|E9PS41|E9PS41_HUMAN;sp|Q6RFH5|WDR74_HUMAN	1	1	1	797150	1	1	1	1	1	1	1	797150	2;2	2;2	2;2	tr|E9PS41|E9PS41_HUMAN WD repeat-containing protein 74 OS=Homo sapiens GN=WDR74 PE=1 SV=1;sp|Q6RFH5|WDR74_HUMAN WD repeat-containing protein 74 OS=Homo sapiens GN=WDR74 PE=1 SV=1	2	2	2	2	0	0	0	0	1	1	1	2	0	0	0	0	1	1	1	2	0	0	0	0	1	1	1	2	7.9	7.9	7.9	36.405
sp|P52298|NCBP2_HUMAN;tr|C9JQX9|C9JQX9_HUMAN;tr|F8WE41|F8WE41_HUMAN;tr|E9PJ16|E9PJ16_HUMAN	sp|P52298|NCBP2_HUMAN;tr|C9JQX9|C9JQX9_HUMAN;tr|F8WE41|F8WE41_HUMAN;tr|E9PJ16|E9PJ16_HUMAN	1	701960	1	776830	1	1	1	1	1	701960	1	776830	2;1;1;1	2;1;1;1	2;1;1;1	sp|P52298|NCBP2_HUMAN Nuclear cap-binding protein subunit 2 OS=Homo sapiens GN=NCBP2 PE=1 SV=1;tr|C9JQX9|C9JQX9_HUMAN Nuclear cap-binding protein subunit 2 (Fragment) OS=Homo sapiens GN=NCBP2 PE=1 SV=1;tr|F8WE41|F8WE41_HUMAN Nuclear cap-binding protein sub	4	2	2	2	0	0	0	1	1	2	1	2	0	0	0	1	1	2	1	2	0	0	0	1	1	2	1	2	12.2	12.2	12.2	18.001
sp|Q15427|SF3B4_HUMAN	sp|Q15427|SF3B4_HUMAN	1	1	1	776010	1	1	1	1	1	1	1	776010	1	1	1	sp|Q15427|SF3B4_HUMAN Splicing factor 3B subunit 4 OS=Homo sapiens GN=SF3B4 PE=1 SV=1	1	1	1	1	1	1	1	1	1	1	1	1	1	1	1	1	1	1	1	1	1	1	1	1	1	1	1	1	3.3	3.3	3.3	44.385
sp|Q15061|WDR43_HUMAN	sp|Q15061|WDR43_HUMAN	1	1	1	760450	1	1	1	1	1	1	1	760450	3	3	3	sp|Q15061|WDR43_HUMAN WD repeat-containing protein 43 OS=Homo sapiens GN=WDR43 PE=1 SV=3	1	3	3	3	0	0	0	0	1	0	2	2	0	0	0	0	1	0	2	2	0	0	0	0	1	0	2	2	4.4	4.4	4.4	74.89
tr|H7C5M9|H7C5M9_HUMAN	tr|H7C5M9|H7C5M9_HUMAN	1	1	1	755630	1	1	1	1	1	1	1	755630	105	1	1	tr|H7C5M9|H7C5M9_HUMAN Programmed cell death protein 10 (Fragment) OS=Homo sapiens GN=PDCD10 PE=1 SV=1	1	105	1	1	44	42	60	57	76	77	75	80	0	0	0	1	0	0	0	1	0	0	0	1	0	0	0	1	44.8	0.6	0.6	305.65
sp|Q9H583|HEAT1_HUMAN;tr|Q5T3Q7|Q5T3Q7_HUMAN;tr|Q6P664|Q6P664_HUMAN	sp|Q9H583|HEAT1_HUMAN;tr|Q5T3Q7|Q5T3Q7_HUMAN	1	1	1001100	737550	1	1	1	1	1	1	1001100	737550	4;4;1	4;4;1	4;4;1	sp|Q9H583|HEAT1_HUMAN HEAT repeat-containing protein 1 OS=Homo sapiens GN=HEATR1 PE=1 SV=3;tr|Q5T3Q7|Q5T3Q7_HUMAN HEAT repeat-containing protein 1 OS=Homo sapiens GN=HEATR1 PE=1 SV=1	3	4	4	4	0	0	0	0	1	1	3	3	0	0	0	0	1	1	3	3	0	0	0	0	1	1	3	3	2.1	2.1	2.1	242.37
sp|Q8N8A6|DDX51_HUMAN	sp|Q8N8A6|DDX51_HUMAN	915060	1	613790	728670	1	1	1	1	915060	1	613790	728670	5	5	5	sp|Q8N8A6|DDX51_HUMAN ATP-dependent RNA helicase DDX51 OS=Homo sapiens GN=DDX51 PE=1 SV=3	1	5	5	5	0	0	0	0	2	0	4	3	0	0	0	0	2	0	4	3	0	0	0	0	2	0	4	3	10.2	10.2	10.2	72.456
tr|M0R0F0|M0R0F0_HUMAN;sp|P46782|RS5_HUMAN;tr|M0R0R2|M0R0R2_HUMAN;tr|M0QZN2|M0QZN2_HUMAN	tr|M0R0F0|M0R0F0_HUMAN;sp|P46782|RS5_HUMAN;tr|M0R0R2|M0R0R2_HUMAN;tr|M0QZN2|M0QZN2_HUMAN	1	1	1	718010	1	1	1	1	1	1	1	718010	1;1;1;1	1;1;1;1	1;1;1;1	tr|M0R0F0|M0R0F0_HUMAN 40S ribosomal protein S5 (Fragment) OS=Homo sapiens GN=RPS5 PE=1 SV=1;sp|P46782|RS5_HUMAN 40S ribosomal protein S5 OS=Homo sapiens GN=RPS5 PE=1 SV=4;tr|M0R0R2|M0R0R2_HUMAN 40S ribosomal protein S5 OS=Homo sapiens GN=RPS5 PE=1 SV=1;tr	4	1	1	1	0	0	0	1	0	1	1	1	0	0	0	1	0	1	1	1	0	0	0	1	0	1	1	1	8.5	8.5	8.5	22.391
tr|D6R9P3|D6R9P3_HUMAN;tr|D6RD18|D6RD18_HUMAN;tr|D6RBZ0|D6RBZ0_HUMAN;tr|A0A087WZV1|A0A087WZV1_HUMAN	tr|D6R9P3|D6R9P3_HUMAN;tr|D6RD18|D6RD18_HUMAN;tr|D6RBZ0|D6RBZ0_HUMAN;tr|A0A087WZV1|A0A087WZV1_HUMAN	1	1	1	706380	1	1	1	1	1	1	1	706380	1;1;1;1	1;1;1;1	1;1;1;1	tr|D6R9P3|D6R9P3_HUMAN Heterogeneous nuclear ribonucleoprotein A/B OS=Homo sapiens GN=HNRNPAB PE=1 SV=1;tr|D6RD18|D6RD18_HUMAN Heterogeneous nuclear ribonucleoprotein A/B OS=Homo sapiens GN=HNRNPAB PE=1 SV=1;tr|D6RBZ0|D6RBZ0_HUMAN Heterogeneous nuclear rib	4	1	1	1	0	0	0	1	0	0	0	1	0	0	0	1	0	0	0	1	0	0	0	1	0	0	0	1	5	5	5	30.302
tr|X6RFN3|X6RFN3_HUMAN;sp|Q99496|RING2_HUMAN;sp|Q06587|RING1_HUMAN	tr|X6RFN3|X6RFN3_HUMAN;sp|Q99496|RING2_HUMAN;sp|Q06587|RING1_HUMAN	1	1	1	688140	1	1	1	1	1	1	1	688140	1;1;1	1;1;1	1;1;1	tr|X6RFN3|X6RFN3_HUMAN E3 ubiquitin-protein ligase RING2 (Fragment) OS=Homo sapiens GN=RNF2 PE=1 SV=2;sp|Q99496|RING2_HUMAN E3 ubiquitin-protein ligase RING2 OS=Homo sapiens GN=RNF2 PE=1 SV=1;sp|Q06587|RING1_HUMAN E3 ubiquitin-protein ligase RING1 OS=Homo	3	1	1	1	0	0	1	1	1	1	1	1	0	0	1	1	1	1	1	1	0	0	1	1	1	1	1	1	5.7	5.7	5.7	27.277
sp|Q99832|TCPH_HUMAN;tr|F8WAM2|F8WAM2_HUMAN	sp|Q99832|TCPH_HUMAN	1	1	1	687010	1	1	1	1	1	1	1	687010	3;1	3;1	3;1	sp|Q99832|TCPH_HUMAN T-complex protein 1 subunit eta OS=Homo sapiens GN=CCT7 PE=1 SV=2	2	3	3	3	0	0	0	0	1	1	1	1	0	0	0	0	1	1	1	1	0	0	0	0	1	1	1	1	7.2	7.2	7.2	59.366
tr|A0A0C4DG26|A0A0C4DG26_HUMAN;sp|Q9NP71|MLXPL_HUMAN	tr|A0A0C4DG26|A0A0C4DG26_HUMAN;sp|Q9NP71|MLXPL_HUMAN	1	1	1	680080	1	1	1	1	1	1	1	680080	1;1	1;1	1;1	tr|A0A0C4DG26|A0A0C4DG26_HUMAN Carbohydrate-responsive element-binding protein OS=Homo sapiens GN=MLXIPL PE=1 SV=1;sp|Q9NP71|MLXPL_HUMAN Carbohydrate-responsive element-binding protein OS=Homo sapiens GN=MLXIPL PE=1 SV=1	2	1	1	1	0	1	1	0	1	0	1	1	0	1	1	0	1	0	1	1	0	1	1	0	1	0	1	1	2.8	2.8	2.8	78.231
sp|Q13206|DDX10_HUMAN;tr|E9PIF2|E9PIF2_HUMAN	sp|Q13206|DDX10_HUMAN;tr|E9PIF2|E9PIF2_HUMAN	531720	1	1	670640	1	1	1	1	531720	1	1	670640	2;2	2;2	2;2	sp|Q13206|DDX10_HUMAN Probable ATP-dependent RNA helicase DDX10 OS=Homo sapiens GN=DDX10 PE=1 SV=2;tr|E9PIF2|E9PIF2_HUMAN Probable ATP-dependent RNA helicase DDX10 OS=Homo sapiens GN=DDX10 PE=1 SV=1	2	2	2	2	0	0	0	0	2	0	1	2	0	0	0	0	2	0	1	2	0	0	0	0	2	0	1	2	2.6	2.6	2.6	100.89
sp|Q86V81|THOC4_HUMAN;tr|E9PB61|E9PB61_HUMAN	sp|Q86V81|THOC4_HUMAN;tr|E9PB61|E9PB61_HUMAN	1	1	1	636970	1	1	1	1	1	1	1	636970	1;1	1;1	1;1	sp|Q86V81|THOC4_HUMAN THO complex subunit 4 OS=Homo sapiens GN=ALYREF PE=1 SV=3;tr|E9PB61|E9PB61_HUMAN THO complex subunit 4 OS=Homo sapiens GN=ALYREF PE=1 SV=1	2	1	1	1	0	0	0	1	0	1	1	1	0	0	0	1	0	1	1	1	0	0	0	1	0	1	1	1	4.3	4.3	4.3	26.888
sp|Q9P1Y5|CAMP3_HUMAN	sp|Q9P1Y5|CAMP3_HUMAN	811260	1	587710	635190	1	1	1	1	811260	1	587710	635190	4	4	4	sp|Q9P1Y5|CAMP3_HUMAN Calmodulin-regulated spectrin-associated protein 3 OS=Homo sapiens GN=CAMSAP3 PE=1 SV=2	1	4	4	4	0	0	1	1	2	1	3	3	0	0	1	1	2	1	3	3	0	0	1	1	2	1	3	3	3.8	3.8	3.8	134.75
sp|P51587|BRCA2_HUMAN	sp|P51587|BRCA2_HUMAN	1	1	615250	608050	1	1	1	1	1	1	615250	608050	4	4	4	sp|P51587|BRCA2_HUMAN Breast cancer type 2 susceptibility protein OS=Homo sapiens GN=BRCA2 PE=1 SV=2	1	4	4	4	0	0	1	1	2	0	2	2	0	0	1	1	2	0	2	2	0	0	1	1	2	0	2	2	1.8	1.8	1.8	384.22
sp|P62306|RUXF_HUMAN	sp|P62306|RUXF_HUMAN	1	1	1	600360	1	1	1	1	1	1	1	600360	1	1	1	sp|P62306|RUXF_HUMAN Small nuclear ribonucleoprotein F OS=Homo sapiens GN=SNRPF PE=1 SV=1	1	1	1	1	1	1	1	1	0	1	1	1	1	1	1	1	0	1	1	1	1	1	1	1	0	1	1	1	15.1	15.1	15.1	9.7251
tr|E7EU85|E7EU85_HUMAN;tr|E9PFF5|E9PFF5_HUMAN;tr|B4DXZ6|B4DXZ6_HUMAN;sp|P51114|FXR1_HUMAN;sp|P51116|FXR2_HUMAN;tr|R9WNI0|R9WNI0_HUMAN;tr|A8MQB8|A8MQB8_HUMAN;tr|A0A0G2JM53|A0A0G2JM53_HUMAN;sp|Q06787|FMR1_HUMAN	tr|E7EU85|E7EU85_HUMAN;tr|E9PFF5|E9PFF5_HUMAN;tr|B4DXZ6|B4DXZ6_HUMAN;sp|P51114|FXR1_HUMAN;sp|P51116|FXR2_HUMAN	1	1	1	598600	1	1	1	1	1	1	1	598600	3;3;3;3;2;1;1;1;1	3;3;3;3;2;1;1;1;1	3;3;3;3;2;1;1;1;1	tr|E7EU85|E7EU85_HUMAN Fragile X mental retardation syndrome-related protein 1 OS=Homo sapiens GN=FXR1 PE=1 SV=1;tr|E9PFF5|E9PFF5_HUMAN Fragile X mental retardation syndrome-related protein 1 OS=Homo sapiens GN=FXR1 PE=1 SV=1;tr|B4DXZ6|B4DXZ6_HUMAN Fragile	9	3	3	3	0	0	0	0	1	1	2	2	0	0	0	0	1	1	2	2	0	0	0	0	1	1	2	2	7.5	7.5	7.5	50.99
sp|P61326|MGN_HUMAN;tr|F5H6P7|F5H6P7_HUMAN;tr|F5H3U9|F5H3U9_HUMAN	sp|P61326|MGN_HUMAN;tr|F5H6P7|F5H6P7_HUMAN	1	1	1	595220	1	1	1	1	1	1	1	595220	7;6;3	1;0;0	1;0;0	sp|P61326|MGN_HUMAN Protein mago nashi homolog OS=Homo sapiens GN=MAGOH PE=1 SV=1;tr|F5H6P7|F5H6P7_HUMAN Protein mago nashi homolog 2 OS=Homo sapiens GN=MAGOHB PE=4 SV=1	3	7	1	1	6	5	5	6	5	3	4	4	0	0	0	0	1	0	0	1	0	0	0	0	1	0	0	1	43.2	5.5	5.5	17.163
sp|Q99575|POP1_HUMAN;tr|E5RK39|E5RK39_HUMAN	sp|Q99575|POP1_HUMAN	1	1	838860	585240	1	1	1	1	1	1	838860	585240	3;1	3;1	3;1	sp|Q99575|POP1_HUMAN Ribonucleases P/MRP protein subunit POP1 OS=Homo sapiens GN=POP1 PE=1 SV=2	2	3	3	3	0	0	0	1	1	1	3	2	0	0	0	1	1	1	3	2	0	0	0	1	1	1	3	2	3.9	3.9	3.9	114.71
sp|Q5JSQ8|KHDCL_HUMAN	sp|Q5JSQ8|KHDCL_HUMAN	1	1	1	568740	1	1	1	1	1	1	1	568740	1	1	1	sp|Q5JSQ8|KHDCL_HUMAN Putative KHDC1-like protein OS=Homo sapiens GN=KHDC1L PE=5 SV=1	1	1	1	1	0	0	0	0	1	1	0	1	0	0	0	0	1	1	0	1	0	0	0	0	1	1	0	1	0.6	0.6	0.6	175.82
sp|B5ME19|EIFCL_HUMAN;sp|Q99613|EIF3C_HUMAN;tr|H3BPE4|H3BPE4_HUMAN	sp|B5ME19|EIFCL_HUMAN;sp|Q99613|EIF3C_HUMAN	1	1	1	564950	1	1	1	1	1	1	1	564950	3;3;1	3;3;1	3;3;1	sp|B5ME19|EIFCL_HUMAN Eukaryotic translation initiation factor 3 subunit C-like protein OS=Homo sapiens GN=EIF3CL PE=3 SV=1;sp|Q99613|EIF3C_HUMAN Eukaryotic translation initiation factor 3 subunit C OS=Homo sapiens GN=EIF3C PE=1 SV=1	3	3	3	3	0	0	1	0	2	0	1	2	0	0	1	0	2	0	1	2	0	0	1	0	2	0	1	2	3.8	3.8	3.8	105.47
sp|Q92526|TCPW_HUMAN	sp|Q92526|TCPW_HUMAN	1	1	1	556240	1	1	1	1	1	1	1	556240	2	1	1	sp|Q92526|TCPW_HUMAN T-complex protein 1 subunit zeta-2 OS=Homo sapiens GN=CCT6B PE=1 SV=5	1	2	1	1	0	0	0	0	1	1	0	1	0	0	0	0	0	1	0	1	0	0	0	0	0	1	0	1	4.7	2.3	2.3	57.821
tr|K7EIG7|K7EIG7_HUMAN;tr|J3QRN6|J3QRN6_HUMAN;sp|O94832|MYO1D_HUMAN;tr|J3KRL0|J3KRL0_HUMAN	tr|K7EIG7|K7EIG7_HUMAN;tr|J3QRN6|J3QRN6_HUMAN;sp|O94832|MYO1D_HUMAN;tr|J3KRL0|J3KRL0_HUMAN	1	1	1	545000	1	1	1	1	1	1	1	545000	3;3;3;2	3;3;3;2	3;3;3;2	tr|K7EIG7|K7EIG7_HUMAN Unconventional myosin-Id OS=Homo sapiens GN=MYO1D PE=1 SV=1;tr|J3QRN6|J3QRN6_HUMAN Unconventional myosin-Id OS=Homo sapiens GN=MYO1D PE=1 SV=1;sp|O94832|MYO1D_HUMAN Unconventional myosin-Id OS=Homo sapiens GN=MYO1D PE=1 SV=2;tr|J3KRL	4	3	3	3	0	0	0	0	1	1	0	2	0	0	0	0	1	1	0	2	0	0	0	0	1	1	0	2	3.7	3.7	3.7	106.01
tr|H0Y8L7|H0Y8L7_HUMAN;tr|D6RG13|D6RG13_HUMAN;sp|P61247|RS3A_HUMAN;tr|E9PFI5|E9PFI5_HUMAN;tr|D6RGE0|D6RGE0_HUMAN;tr|D6RI02|D6RI02_HUMAN;tr|D6RED7|D6RED7_HUMAN;tr|D6RAS7|D6RAS7_HUMAN;tr|D6RB09|D6RB09_HUMAN;tr|H0Y9Y4|H0Y9Y4_HUMAN;tr|D6RAT0|D6RAT0_HUMAN	tr|H0Y8L7|H0Y8L7_HUMAN;tr|D6RG13|D6RG13_HUMAN;sp|P61247|RS3A_HUMAN;tr|E9PFI5|E9PFI5_HUMAN;tr|D6RGE0|D6RGE0_HUMAN;tr|D6RI02|D6RI02_HUMAN;tr|D6RED7|D6RED7_HUMAN;tr|D6RAS7|D6RAS7_HUMAN;tr|D6RB09|D6RB09_HUMAN;tr|H0Y9Y4|H0Y9Y4_HUMAN;tr|D6RAT0|D6RAT0_HUMAN	1	1	1	541910	1	1	1	1	1	1	1	541910	2;2;2;2;1;1;1;1;1;1;1	2;2;2;2;1;1;1;1;1;1;1	2;2;2;2;1;1;1;1;1;1;1	tr|H0Y8L7|H0Y8L7_HUMAN 40S ribosomal protein S3a (Fragment) OS=Homo sapiens GN=RPS3A PE=1 SV=1;tr|D6RG13|D6RG13_HUMAN 40S ribosomal protein S3a (Fragment) OS=Homo sapiens GN=RPS3A PE=1 SV=1;sp|P61247|RS3A_HUMAN 40S ribosomal protein S3a OS=Homo sapiens GN=	11	2	2	2	0	1	0	0	0	0	1	1	0	1	0	0	0	0	1	1	0	1	0	0	0	0	1	1	8.9	8.9	8.9	22.137
tr|M0QY43|M0QY43_HUMAN;sp|Q7Z406|MYH14_HUMAN	tr|M0QY43|M0QY43_HUMAN;sp|Q7Z406|MYH14_HUMAN	1	1	1	537760	1	1	1	1	1	1	1	537760	5;5	1;1	1;1	tr|M0QY43|M0QY43_HUMAN Myosin-14 (Fragment) OS=Homo sapiens GN=MYH14 PE=1 SV=5;sp|Q7Z406|MYH14_HUMAN Myosin-14 OS=Homo sapiens GN=MYH14 PE=1 SV=2	2	5	1	1	0	1	1	2	4	2	4	4	0	0	0	0	1	0	1	1	0	0	0	0	1	0	1	1	5	1.2	1.2	113.85
sp|Q86U38|NOP9_HUMAN	sp|Q86U38|NOP9_HUMAN	1	1	1	534040	1	1	1	1	1	1	1	534040	1	1	1	sp|Q86U38|NOP9_HUMAN Nucleolar protein 9 OS=Homo sapiens GN=NOP9 PE=1 SV=1	1	1	1	1	0	0	0	0	0	0	0	1	0	0	0	0	0	0	0	1	0	0	0	0	0	0	0	1	0.3	0.3	0.3	516.42
tr|D6RA57|D6RA57_HUMAN;sp|Q96EY4|TMA16_HUMAN;tr|H0Y9X1|H0Y9X1_HUMAN	tr|D6RA57|D6RA57_HUMAN;sp|Q96EY4|TMA16_HUMAN;tr|H0Y9X1|H0Y9X1_HUMAN	1	1	1	507490	1	1	1	1	1	1	1	507490	1;1;1	1;1;1	1;1;1	tr|D6RA57|D6RA57_HUMAN Translation machinery-associated protein 16 OS=Homo sapiens GN=TMA16 PE=1 SV=1;sp|Q96EY4|TMA16_HUMAN Translation machinery-associated protein 16 OS=Homo sapiens GN=TMA16 PE=1 SV=2;tr|H0Y9X1|H0Y9X1_HUMAN Translation machinery-associat	3	1	1	1	0	0	0	0	1	1	1	1	0	0	0	0	1	1	1	1	0	0	0	0	1	1	1	1	10.4	10.4	10.4	17.155
sp|Q9UMY1|NOL7_HUMAN	sp|Q9UMY1|NOL7_HUMAN	1	1	1	506820	1	1	1	1	1	1	1	506820	1	1	1	sp|Q9UMY1|NOL7_HUMAN Nucleolar protein 7 OS=Homo sapiens GN=NOL7 PE=1 SV=2	1	1	1	1	0	0	0	0	1	0	1	1	0	0	0	0	1	0	1	1	0	0	0	0	1	0	1	1	5.4	5.4	5.4	29.426
sp|P05109|S10A8_HUMAN	sp|P05109|S10A8_HUMAN	1	1	1	496610	1	1	1	1	1	1	1	496610	1	1	1	sp|P05109|S10A8_HUMAN Protein S100-A8 OS=Homo sapiens GN=S100A8 PE=1 SV=1	1	1	1	1	1	0	0	1	0	1	1	1	1	0	0	1	0	1	1	1	1	0	0	1	0	1	1	1	11.8	11.8	11.8	10.834
sp|P81605|DCD_HUMAN	sp|P81605|DCD_HUMAN	1	1	1	492090	1	1	1	1	1	1	1	492090	1	1	1	sp|P81605|DCD_HUMAN Dermcidin OS=Homo sapiens GN=DCD PE=1 SV=2	1	1	1	1	1	0	1	1	1	1	1	1	1	0	1	1	1	1	1	1	1	0	1	1	1	1	1	1	12.7	12.7	12.7	11.284
tr|F8VV32|F8VV32_HUMAN;tr|A0A0B4J259|A0A0B4J259_HUMAN;sp|P61626|LYSC_HUMAN	tr|F8VV32|F8VV32_HUMAN;tr|A0A0B4J259|A0A0B4J259_HUMAN;sp|P61626|LYSC_HUMAN	1	1	1	487150	1	1	1	1	1	1	1	487150	1;1;1	1;1;1	1;1;1	tr|F8VV32|F8VV32_HUMAN Lysozyme OS=Homo sapiens GN=LYZ PE=1 SV=1;tr|A0A0B4J259|A0A0B4J259_HUMAN Lysozyme OS=Homo sapiens GN=LYZ PE=1 SV=1;sp|P61626|LYSC_HUMAN Lysozyme C OS=Homo sapiens GN=LYZ PE=1 SV=1	3	1	1	1	1	1	1	0	1	0	0	1	1	1	1	0	1	0	0	1	1	1	1	0	1	0	0	1	11.5	11.5	11.5	11.488
sp|Q13601|KRR1_HUMAN;tr|A0A087WZC7|A0A087WZC7_HUMAN;CON__O43790;CON__Q14533;tr|F8VW96|F8VW96_HUMAN	sp|Q13601|KRR1_HUMAN	1	1	1	443550	1	1	1	1	1	1	1	443550	8;2;2;2;2	4;2;1;1;1	4;2;1;1;1	sp|Q13601|KRR1_HUMAN KRR1 small subunit processome component homolog OS=Homo sapiens GN=KRR1 PE=1 SV=4	5	8	4	4	2	1	3	4	4	4	4	4	0	0	0	1	1	1	1	2	0	0	0	1	1	1	1	2	1.5	0.7	0.7	710.72
sp|O75691|UTP20_HUMAN	sp|O75691|UTP20_HUMAN	1	1	1	428490	1	1	1	1	1	1	1	428490	3	3	3	sp|O75691|UTP20_HUMAN Small subunit processome component 20 homolog OS=Homo sapiens GN=UTP20 PE=1 SV=3	1	3	3	3	0	0	0	0	2	0	1	1	0	0	0	0	2	0	1	1	0	0	0	0	2	0	1	1	1.2	1.2	1.2	318.38
sp|Q5D862|FILA2_HUMAN;CON__Q5D862	sp|Q5D862|FILA2_HUMAN;CON__Q5D862	1	1	1	409660	1	1	1	1	1	1	1	409660	1;1	1;1	1;1	sp|Q5D862|FILA2_HUMAN Filaggrin-2 OS=Homo sapiens GN=FLG2 PE=1 SV=1;	2	1	1	1	1	0	1	1	0	1	1	1	1	0	1	1	0	1	1	1	1	0	1	1	0	1	1	1	0.5	0.5	0.5	248.07
tr|C9J9K3|C9J9K3_HUMAN;tr|A6NE09|A6NE09_HUMAN;sp|P08865|RSSA_HUMAN;tr|A0A0C4DG17|A0A0C4DG17_HUMAN	tr|C9J9K3|C9J9K3_HUMAN;tr|A6NE09|A6NE09_HUMAN;sp|P08865|RSSA_HUMAN;tr|A0A0C4DG17|A0A0C4DG17_HUMAN	1	1	1	370800	1	1	1	1	1	1	1	370800	1;1;1;1	1;1;1;1	1;1;1;1	tr|C9J9K3|C9J9K3_HUMAN 40S ribosomal protein SA (Fragment) OS=Homo sapiens GN=RPSA PE=1 SV=5;tr|A6NE09|A6NE09_HUMAN 40S ribosomal protein SA OS=Homo sapiens GN=RPSAP58 PE=1 SV=1;sp|P08865|RSSA_HUMAN 40S ribosomal protein SA OS=Homo sapiens GN=RPSA PE=1 SV=	4	1	1	1	0	0	0	1	0	0	0	1	0	0	0	1	0	0	0	1	0	0	0	1	0	0	0	1	6.4	6.4	6.4	29.505
tr|F8W084|F8W084_HUMAN;tr|F8WJN3|F8WJN3_HUMAN;sp|Q16630|CPSF6_HUMAN	tr|F8W084|F8W084_HUMAN;tr|F8WJN3|F8WJN3_HUMAN;sp|Q16630|CPSF6_HUMAN	1	1	1	369680	1	1	1	1	1	1	1	369680	1;1;1	1;1;1	1;1;1	tr|F8W084|F8W084_HUMAN Cleavage and polyadenylation-specificity factor subunit 6 OS=Homo sapiens GN=CPSF6 PE=1 SV=1;tr|F8WJN3|F8WJN3_HUMAN Cleavage and polyadenylation-specificity factor subunit 6 OS=Homo sapiens GN=CPSF6 PE=1 SV=1;sp|Q16630|CPSF6_HUMAN Cl	3	1	1	1	0	0	0	0	0	1	1	1	0	0	0	0	0	1	1	1	0	0	0	0	0	1	1	1	12.1	12.1	12.1	11.625
tr|A0A087WTB6|A0A087WTB6_HUMAN;sp|P08754|GNAI3_HUMAN;sp|P63092|GNAS2_HUMAN;sp|P38405|GNAL_HUMAN;sp|P04899|GNAI2_HUMAN;sp|A8MTJ3|GNAT3_HUMAN;sp|P63096|GNAI1_HUMAN;sp|P09471|GNAO_HUMAN;sp|P19087|GNAT2_HUMAN;tr|A2A2R6|A2A2R6_HUMAN;sp|P11488|GNAT1_HUMAN;tr|H0Y7F4|H0Y7F4_HUMAN;tr|Q5JWE9|Q5JWE9_HUMAN;tr|A0A087WZE5|A0A087WZE5_HUMAN;tr|H0Y7E8|H0Y7E8_HUMAN;tr|Q5JWD1|Q5JWD1_HUMAN;sp|Q5JWF2|GNAS1_HUMAN	tr|A0A087WTB6|A0A087WTB6_HUMAN;sp|P08754|GNAI3_HUMAN;sp|P63092|GNAS2_HUMAN;sp|P38405|GNAL_HUMAN;sp|P04899|GNAI2_HUMAN;sp|A8MTJ3|GNAT3_HUMAN;sp|P63096|GNAI1_HUMAN;sp|P09471|GNAO_HUMAN;sp|P19087|GNAT2_HUMAN;tr|A2A2R6|A2A2R6_HUMAN;sp|P11488|GNAT1_HUMAN;tr|H0Y7F4|H0Y7F4_HUMAN;tr|Q5JWE9|Q5JWE9_HUMAN;tr|A0A087WZE5|A0A087WZE5_HUMAN;tr|H0Y7E8|H0Y7E8_HUMAN;tr|Q5JWD1|Q5JWD1_HUMAN;sp|Q5JWF2|GNAS1_HUMAN	1	1	1	363020	1	1	1	1	1	1	1	363020	1;1;1;1;1;1;1;1;1;1;1;1;1;1;1;1;1	1;1;1;1;1;1;1;1;1;1;1;1;1;1;1;1;1	1;1;1;1;1;1;1;1;1;1;1;1;1;1;1;1;1	tr|A0A087WTB6|A0A087WTB6_HUMAN Guanine nucleotide-binding protein G(o) subunit alpha OS=Homo sapiens GN=GNAO1 PE=1 SV=1;sp|P08754|GNAI3_HUMAN Guanine nucleotide-binding protein G(k) subunit alpha OS=Homo sapiens GN=GNAI3 PE=1 SV=3;sp|P63092|GNAS2_HUMAN Gua	17	1	1	1	0	0	0	0	1	0	0	1	0	0	0	0	1	0	0	1	0	0	0	0	1	0	0	1	20.4	20.4	20.4	5.7186
tr|H0YM60|H0YM60_HUMAN;sp|Q9NPE3|NOP10_HUMAN	tr|H0YM60|H0YM60_HUMAN;sp|Q9NPE3|NOP10_HUMAN	1	1	1	361900	1	1	1	1	1	1	1	361900	1;1	1;1	1;1	tr|H0YM60|H0YM60_HUMAN H/ACA ribonucleoprotein complex subunit 3 OS=Homo sapiens GN=NOP10 PE=1 SV=1;sp|Q9NPE3|NOP10_HUMAN H/ACA ribonucleoprotein complex subunit 3 OS=Homo sapiens GN=NOP10 PE=1 SV=1	2	1	1	1	0	0	0	0	0	0	1	1	0	0	0	0	0	0	1	1	0	0	0	0	0	0	1	1	36.1	36.1	36.1	4.2337
tr|B9A008|B9A008_HUMAN;tr|H0Y714|H0Y714_HUMAN;sp|Q96G21|IMP4_HUMAN;tr|E7ENR5|E7ENR5_HUMAN;tr|B8ZZ47|B8ZZ47_HUMAN	tr|B9A008|B9A008_HUMAN;tr|H0Y714|H0Y714_HUMAN;sp|Q96G21|IMP4_HUMAN;tr|E7ENR5|E7ENR5_HUMAN;tr|B8ZZ47|B8ZZ47_HUMAN	1	1	1	351300	1	1	1	1	1	1	1	351300	2;2;2;2;1	2;2;2;2;1	2;2;2;2;1	tr|B9A008|B9A008_HUMAN U3 small nucleolar ribonucleoprotein protein IMP4 (Fragment) OS=Homo sapiens GN=IMP4 PE=1 SV=1;tr|H0Y714|H0Y714_HUMAN U3 small nucleolar ribonucleoprotein protein IMP4 (Fragment) OS=Homo sapiens GN=IMP4 PE=1 SV=1;sp|Q96G21|IMP4_HUMAN	5	2	2	2	0	0	0	0	0	0	2	2	0	0	0	0	0	0	2	2	0	0	0	0	0	0	2	2	14	14	14	19.619
sp|Q8NB90|SPAT5_HUMAN	sp|Q8NB90|SPAT5_HUMAN	1	1	1	350090	1	1	1	1	1	1	1	350090	2	2	2	sp|Q8NB90|SPAT5_HUMAN Spermatogenesis-associated protein 5 OS=Homo sapiens GN=SPATA5 PE=1 SV=3	1	2	2	2	0	0	0	0	0	0	1	1	0	0	0	0	0	0	1	1	0	0	0	0	0	0	1	1	2.9	2.9	2.9	97.903
tr|J3QRX9|J3QRX9_HUMAN;tr|J3QRX4|J3QRX4_HUMAN;sp|Q9NQ92|COPRS_HUMAN	tr|J3QRX9|J3QRX9_HUMAN;tr|J3QRX4|J3QRX4_HUMAN;sp|Q9NQ92|COPRS_HUMAN	1	1	1	344410	1	1	1	1	1	1	1	344410	1;1;1	1;1;1	1;1;1	tr|J3QRX9|J3QRX9_HUMAN Coordinator of PRMT5 and differentiation stimulator OS=Homo sapiens GN=COPRS PE=1 SV=1;tr|J3QRX4|J3QRX4_HUMAN Coordinator of PRMT5 and differentiation stimulator OS=Homo sapiens GN=COPRS PE=1 SV=1;sp|Q9NQ92|COPRS_HUMAN Coordinator of	3	1	1	1	0	0	0	0	1	1	1	1	0	0	0	0	1	1	1	1	0	0	0	0	1	1	1	1	26.5	26.5	26.5	7.2945
sp|Q8NC51|PAIRB_HUMAN	sp|Q8NC51|PAIRB_HUMAN	1	1	1	343510	1	1	1	1	1	1	1	343510	1	1	1	sp|Q8NC51|PAIRB_HUMAN Plasminogen activator inhibitor 1 RNA-binding protein OS=Homo sapiens GN=SERBP1 PE=1 SV=2	1	1	1	1	0	0	0	0	0	0	0	1	0	0	0	0	0	0	0	1	0	0	0	0	0	0	0	1	3.9	3.9	3.9	44.965
tr|J3KMX5|J3KMX5_HUMAN;sp|P62277|RS13_HUMAN	tr|J3KMX5|J3KMX5_HUMAN;sp|P62277|RS13_HUMAN	1	1	1	330900	1	1	1	1	1	1	1	330900	1;1	1;1	1;1	tr|J3KMX5|J3KMX5_HUMAN 40S ribosomal protein S13 OS=Homo sapiens GN=RPS13 PE=1 SV=1;sp|P62277|RS13_HUMAN 40S ribosomal protein S13 OS=Homo sapiens GN=RPS13 PE=1 SV=2	2	1	1	1	0	0	0	0	0	0	1	1	0	0	0	0	0	0	1	1	0	0	0	0	0	0	1	1	8.1	8.1	8.1	16.733
tr|H7C048|H7C048_HUMAN;tr|K7EMQ8|K7EMQ8_HUMAN;tr|J3QKS7|J3QKS7_HUMAN;sp|Q969G3|SMCE1_HUMAN;tr|B4DGM3|B4DGM3_HUMAN	tr|H7C048|H7C048_HUMAN;tr|K7EMQ8|K7EMQ8_HUMAN;tr|J3QKS7|J3QKS7_HUMAN;sp|Q969G3|SMCE1_HUMAN;tr|B4DGM3|B4DGM3_HUMAN	1	1	1	328120	1	1	1	1	1	1	1	328120	2;2;2;2;2	2;2;2;2;2	2;2;2;2;2	tr|H7C048|H7C048_HUMAN SWI/SNF-related matrix-associated actin-dependent regulator of chromatin subfamily E member 1 (Fragment) OS=Homo sapiens GN=SMARCE1 PE=1 SV=1;tr|K7EMQ8|K7EMQ8_HUMAN SWI/SNF-related matrix-associated actin-dependent regulator of chrom	5	2	2	2	0	0	0	0	1	0	0	1	0	0	0	0	1	0	0	1	0	0	0	0	1	0	0	1	15.9	15.9	15.9	18.257
sp|P26641|EF1G_HUMAN	sp|P26641|EF1G_HUMAN	1	1	1	318070	1	1	1	1	1	1	1	318070	1	1	1	sp|P26641|EF1G_HUMAN Elongation factor 1-gamma OS=Homo sapiens GN=EEF1G PE=1 SV=3	1	1	1	1	0	0	0	1	1	1	1	1	0	0	0	1	1	1	1	1	0	0	0	1	1	1	1	1	3	3	3	50.118
tr|G3V4G1|G3V4G1_HUMAN;sp|Q8NEJ9|NGDN_HUMAN	tr|G3V4G1|G3V4G1_HUMAN;sp|Q8NEJ9|NGDN_HUMAN	1	1	1	268470	1	1	1	1	1	1	1	268470	1;1	1;1	1;1	tr|G3V4G1|G3V4G1_HUMAN Neuroguidin (Fragment) OS=Homo sapiens GN=NGDN PE=1 SV=5;sp|Q8NEJ9|NGDN_HUMAN Neuroguidin OS=Homo sapiens GN=NGDN PE=1 SV=1	2	1	1	1	0	0	0	0	0	0	0	1	0	0	0	0	0	0	0	1	0	0	0	0	0	0	0	1	9.9	9.9	9.9	15.727
sp|Q86YP4|P66A_HUMAN	sp|Q86YP4|P66A_HUMAN	1	1	1	255220	1	1	1	1	1	1	1	255220	2	2	1	sp|Q86YP4|P66A_HUMAN Transcriptional repressor p66-alpha OS=Homo sapiens GN=GATAD2A PE=1 SV=1	1	2	2	1	0	0	0	0	0	0	1	1	0	0	0	0	0	0	1	1	0	0	0	0	0	0	1	0	4.9	4.9	3.2	68.062
tr|C9J406|C9J406_HUMAN;tr|B9A067|B9A067_HUMAN;sp|Q16891|MIC60_HUMAN;tr|H7C463|H7C463_HUMAN	tr|C9J406|C9J406_HUMAN;tr|B9A067|B9A067_HUMAN;sp|Q16891|MIC60_HUMAN;tr|H7C463|H7C463_HUMAN	1	1	1	243330	1	1	1	1	1	1	1	243330	1;1;1;1	1;1;1;1	1;1;1;1	tr|C9J406|C9J406_HUMAN MICOS complex subunit MIC60 OS=Homo sapiens GN=IMMT PE=1 SV=1;tr|B9A067|B9A067_HUMAN MICOS complex subunit MIC60 OS=Homo sapiens GN=IMMT PE=1 SV=2;sp|Q16891|MIC60_HUMAN MICOS complex subunit MIC60 OS=Homo sapiens GN=IMMT PE=1 SV=1;tr	4	1	1	1	0	0	0	0	1	0	0	1	0	0	0	0	1	0	0	1	0	0	0	0	1	0	0	1	2	2	2	73.253
sp|Q9Y277|VDAC3_HUMAN	sp|Q9Y277|VDAC3_HUMAN	1	1	1	242790	1	1	1	1	1	1	1	242790	1	1	1	sp|Q9Y277|VDAC3_HUMAN Voltage-dependent anion-selective channel protein 3 OS=Homo sapiens GN=VDAC3 PE=1 SV=1	1	1	1	1	0	0	0	0	1	0	1	1	0	0	0	0	1	0	1	1	0	0	0	0	1	0	1	1	7.1	7.1	7.1	30.658
sp|Q96KR1|ZFR_HUMAN	sp|Q96KR1|ZFR_HUMAN	1	1	1	242220	1	1	1	1	1	1	1	242220	2	2	2	sp|Q96KR1|ZFR_HUMAN Zinc finger RNA-binding protein OS=Homo sapiens GN=ZFR PE=1 SV=2	1	2	2	2	0	0	0	0	1	0	1	1	0	0	0	0	1	0	1	1	0	0	0	0	1	0	1	1	2.9	2.9	2.9	117.01
tr|E9PMV1|E9PMV1_HUMAN	tr|E9PMV1|E9PMV1_HUMAN	1	1	1	238100	1	1	1	1	1	1	1	238100	19	1	1	tr|E9PMV1|E9PMV1_HUMAN Plectin (Fragment) OS=Homo sapiens GN=PLEC PE=1 SV=1	1	19	1	1	13	13	15	15	13	15	15	16	0	0	0	0	0	0	0	1	0	0	0	0	0	0	0	1	32.1	2.4	2.4	80.779
tr|E9PMS6|E9PMS6_HUMAN	tr|E9PMS6|E9PMS6_HUMAN	1	1	1	229180	1	1	1	1	1	1	1	229180	16	1	0	tr|E9PMS6|E9PMS6_HUMAN LIM domain only protein 7 OS=Homo sapiens GN=LMO7 PE=1 SV=1	1	16	1	0	0	0	2	3	10	7	7	8	0	0	0	0	1	1	1	1	0	0	0	0	0	0	0	0	19.4	0.9	0	145.42
sp|Q13895|BYST_HUMAN;tr|H7BY94|H7BY94_HUMAN;tr|F8WBL2|F8WBL2_HUMAN	sp|Q13895|BYST_HUMAN;tr|H7BY94|H7BY94_HUMAN;tr|F8WBL2|F8WBL2_HUMAN	1	1	1	227270	1	1	1	1	1	1	1	227270	2;1;1	2;1;1	2;1;1	sp|Q13895|BYST_HUMAN Bystin OS=Homo sapiens GN=BYSL PE=1 SV=3;tr|H7BY94|H7BY94_HUMAN Bystin (Fragment) OS=Homo sapiens GN=BYSL PE=1 SV=1;tr|F8WBL2|F8WBL2_HUMAN Bystin OS=Homo sapiens GN=BYSL PE=1 SV=1	3	2	2	2	0	0	0	0	0	0	1	1	0	0	0	0	0	0	1	1	0	0	0	0	0	0	1	1	5.5	5.5	5.5	49.601
sp|Q5VTL8|PR38B_HUMAN;tr|Q9BRG6|Q9BRG6_HUMAN	sp|Q5VTL8|PR38B_HUMAN;tr|Q9BRG6|Q9BRG6_HUMAN	1	1	1	224030	1	1	1	1	1	1	1	224030	2;2	2;2	2;2	sp|Q5VTL8|PR38B_HUMAN Pre-mRNA-splicing factor 38B OS=Homo sapiens GN=PRPF38B PE=1 SV=1;tr|Q9BRG6|Q9BRG6_HUMAN APOL4 protein OS=Homo sapiens GN=APOL4 PE=1 SV=1	2	2	2	2	0	0	0	0	1	0	1	1	0	0	0	0	1	0	1	1	0	0	0	0	1	0	1	1	3.3	3.3	3.3	64.467
tr|G3V461|G3V461_HUMAN;tr|G3V4N7|G3V4N7_HUMAN;sp|P12277|KCRB_HUMAN	tr|G3V461|G3V461_HUMAN;tr|G3V4N7|G3V4N7_HUMAN;sp|P12277|KCRB_HUMAN	1	1	1	170520	1	1	1	1	1	1	1	170520	1;1;1	1;1;1	1;1;1	tr|G3V461|G3V461_HUMAN Creatine kinase B-type (Fragment) OS=Homo sapiens GN=CKB PE=1 SV=1;tr|G3V4N7|G3V4N7_HUMAN Creatine kinase B-type (Fragment) OS=Homo sapiens GN=CKB PE=1 SV=1;sp|P12277|KCRB_HUMAN Creatine kinase B-type OS=Homo sapiens GN=CKB PE=1 SV=1	3	1	1	1	0	0	0	0	1	0	1	1	0	0	0	0	1	0	1	1	0	0	0	0	1	0	1	1	8.6	8.6	8.6	14.221
sp|Q8WTT2|NOC3L_HUMAN	sp|Q8WTT2|NOC3L_HUMAN	2.54294	2.13274	2.45422	6.40245	3941900	3473700	3650200	1946600	10024000	7408500	8958400	12463000	14	14	14	sp|Q8WTT2|NOC3L_HUMAN Nucleolar complex protein 3 homolog OS=Homo sapiens GN=NOC3L PE=1 SV=1	1	14	14	14	4	4	4	2	10	9	13	10	4	4	4	2	10	9	13	10	4	4	4	2	10	9	13	10	19.6	19.6	19.6	92.547
sp|Q9H7B2|RPF2_HUMAN;tr|Q5VXN0|Q5VXN0_HUMAN	sp|Q9H7B2|RPF2_HUMAN;tr|Q5VXN0|Q5VXN0_HUMAN	2.59661	3.23383	3.29047	5.06643	3733100	3115500	3927400	4267700	9693400	10075000	12923000	21622000	10;8	10;8	10;8	sp|Q9H7B2|RPF2_HUMAN Ribosome production factor 2 homolog OS=Homo sapiens GN=RPF2 PE=1 SV=2;tr|Q5VXN0|Q5VXN0_HUMAN Ribosome production factor 2 homolog (Fragment) OS=Homo sapiens GN=RPF2 PE=1 SV=1	2	10	10	10	3	2	2	4	5	4	7	8	3	2	2	4	5	4	7	8	3	2	2	4	5	4	7	8	32.4	32.4	32.4	35.582
sp|Q13823|NOG2_HUMAN;tr|H0YG10|H0YG10_HUMAN	sp|Q13823|NOG2_HUMAN	3.66916	3.25543	4.37454	5.03065	3029300	2899800	4204100	4257300	11115000	9440100	18391000	21417000	23;6	23;6	23;6	sp|Q13823|NOG2_HUMAN Nucleolar GTP-binding protein 2 OS=Homo sapiens GN=GNL2 PE=1 SV=1	2	23	23	23	3	3	4	3	10	10	16	16	3	3	4	3	10	10	16	16	3	3	4	3	10	10	16	16	31.2	31.2	31.2	83.654
sp|O00567|NOP56_HUMAN;tr|H0YDU4|H0YDU4_HUMAN;tr|H0Y653|H0Y653_HUMAN;tr|Q5JXT2|Q5JXT2_HUMAN	sp|O00567|NOP56_HUMAN;tr|H0YDU4|H0YDU4_HUMAN	0.978647	1.16619	6.83542	4.2886	4041500	4736100	2368400	2826100	3955200	5523200	16189000	12120000	19;10;9;8	19;10;9;8	19;10;9;8	sp|O00567|NOP56_HUMAN Nucleolar protein 56 OS=Homo sapiens GN=NOP56 PE=1 SV=4;tr|H0YDU4|H0YDU4_HUMAN Nucleolar protein 56 (Fragment) OS=Homo sapiens GN=NOP56 PE=1 SV=1	4	19	19	19	3	2	3	4	5	8	15	13	3	2	3	4	5	8	15	13	3	2	3	4	5	8	15	13	33.8	33.8	33.8	66.049
sp|Q01780|EXOSX_HUMAN;tr|K7EJ37|K7EJ37_HUMAN	sp|Q01780|EXOSX_HUMAN	6059900	4281400	7720200	4.01218	1	1	1	1995300	6059900	4281400	7720200	8005500	16;2	16;2	16;2	sp|Q01780|EXOSX_HUMAN Exosome component 10 OS=Homo sapiens GN=EXOSC10 PE=1 SV=2	2	16	16	16	1	1	1	3	10	8	11	13	1	1	1	3	10	8	11	13	1	1	1	3	10	8	11	13	21.9	21.9	21.9	100.83
sp|Q9GZR7|DDX24_HUMAN;tr|G3V529|G3V529_HUMAN;tr|F5GYL3|F5GYL3_HUMAN;tr|A0A087WXU8|A0A087WXU8_HUMAN	sp|Q9GZR7|DDX24_HUMAN;tr|G3V529|G3V529_HUMAN;tr|F5GYL3|F5GYL3_HUMAN;tr|A0A087WXU8|A0A087WXU8_HUMAN	2799500	1947500	4635800	3.84616	1	1	1	1042000	2799500	1947500	4635800	4007700	10;10;7;6	10;10;7;6	10;10;7;6	sp|Q9GZR7|DDX24_HUMAN ATP-dependent RNA helicase DDX24 OS=Homo sapiens GN=DDX24 PE=1 SV=1;tr|G3V529|G3V529_HUMAN ATP-dependent RNA helicase DDX24 OS=Homo sapiens GN=DDX24 PE=1 SV=1;tr|F5GYL3|F5GYL3_HUMAN ATP-dependent RNA helicase DDX24 OS=Homo sapiens GN=	4	10	10	10	1	0	1	2	4	4	9	7	1	0	1	2	4	4	9	7	1	0	1	2	4	4	9	7	15	15	15	96.331
sp|Q9NVX2|NLE1_HUMAN;tr|A0A0A0MRH0|A0A0A0MRH0_HUMAN;tr|K7EN33|K7EN33_HUMAN;tr|K7ERN7|K7ERN7_HUMAN	sp|Q9NVX2|NLE1_HUMAN;tr|A0A0A0MRH0|A0A0A0MRH0_HUMAN;tr|K7EN33|K7EN33_HUMAN	2173800	3378400	5463900	3.76599	1	1	1	1494400	2173800	3378400	5463900	5627900	8;7;6;1	8;7;6;1	8;7;6;1	sp|Q9NVX2|NLE1_HUMAN Notchless protein homolog 1 OS=Homo sapiens GN=NLE1 PE=1 SV=4;tr|A0A0A0MRH0|A0A0A0MRH0_HUMAN Notchless protein homolog 1 OS=Homo sapiens GN=NLE1 PE=1 SV=1;tr|K7EN33|K7EN33_HUMAN Notchless protein homolog 1 (Fragment) OS=Homo sapiens GN	4	8	8	8	0	0	0	2	5	3	6	6	0	0	0	2	5	3	6	6	0	0	0	2	5	3	6	6	24.5	24.5	24.5	53.32
sp|P62913|RL11_HUMAN;tr|Q5VVC8|Q5VVC8_HUMAN;tr|Q5VVC9|Q5VVC9_HUMAN	sp|P62913|RL11_HUMAN;tr|Q5VVC8|Q5VVC8_HUMAN	2.01449	2.08288	2.55845	3.44257	13867000	16096000	14492000	15435000	27935000	33526000	37077000	53136000	6;4;2	6;4;2	6;4;2	sp|P62913|RL11_HUMAN 60S ribosomal protein L11 OS=Homo sapiens GN=RPL11 PE=1 SV=2;tr|Q5VVC8|Q5VVC8_HUMAN 60S ribosomal protein L11 (Fragment) OS=Homo sapiens GN=RPL11 PE=1 SV=1	3	6	6	6	3	3	3	4	3	5	5	2	3	3	3	4	3	5	5	2	3	3	3	4	3	5	5	2	33.1	33.1	33.1	20.252
tr|J3QR09|J3QR09_HUMAN;sp|P84098|RL19_HUMAN;tr|J3KTE4|J3KTE4_HUMAN;tr|J3QL15|J3QL15_HUMAN	tr|J3QR09|J3QR09_HUMAN;sp|P84098|RL19_HUMAN;tr|J3KTE4|J3KTE4_HUMAN	1.86545	0.806995	3.13078	3.40104	4902100	4188500	4423500	3175500	9144600	3380100	13849000	10800000	5;5;5;2	5;5;5;2	5;5;5;2	tr|J3QR09|J3QR09_HUMAN Ribosomal protein L19 OS=Homo sapiens GN=RPL19 PE=1 SV=1;sp|P84098|RL19_HUMAN 60S ribosomal protein L19 OS=Homo sapiens GN=RPL19 PE=1 SV=1;tr|J3KTE4|J3KTE4_HUMAN Ribosomal protein L19 OS=Homo sapiens GN=RPL19 PE=1 SV=1	4	5	5	5	2	2	2	2	4	2	5	2	2	2	2	2	4	2	5	2	2	2	2	2	4	2	5	2	22.8	22.8	22.8	23.134
sp|P56537|IF6_HUMAN;tr|B7ZBH1|B7ZBH1_HUMAN	sp|P56537|IF6_HUMAN	3.68013	2.96518	2.04049	3.33654	7178000	7104800	11855000	11856000	26416000	21067000	24190000	39558000	4;1	4;1	4;1	sp|P56537|IF6_HUMAN Eukaryotic translation initiation factor 6 OS=Homo sapiens GN=EIF6 PE=1 SV=1	2	4	4	4	3	2	4	3	3	3	4	3	3	2	4	3	3	3	4	3	3	2	4	3	3	3	4	3	33.1	33.1	33.1	26.599
sp|Q15050|RRS1_HUMAN	sp|Q15050|RRS1_HUMAN	1.81006	2.37167	3.72592	3.33576	4610300	4613200	5326200	5228800	8344900	10941000	19845000	17442000	13	13	13	sp|Q15050|RRS1_HUMAN Ribosome biogenesis regulatory protein homolog OS=Homo sapiens GN=RRS1 PE=1 SV=2	1	13	13	13	4	3	6	6	10	8	13	7	4	3	6	6	10	8	13	7	4	3	6	6	10	8	13	7	37.5	37.5	37.5	41.193
sp|P62906|RL10A_HUMAN	sp|P62906|RL10A_HUMAN	2.20504	2.34277	2.37588	3.09522	42538000	44840000	55895000	38427000	93798000	105050000	132800000	118940000	9	9	9	sp|P62906|RL10A_HUMAN 60S ribosomal protein L10a OS=Homo sapiens GN=RPL10A PE=1 SV=2	1	9	9	9	7	6	6	6	7	6	7	7	7	6	6	6	7	6	7	7	7	6	6	6	7	6	7	7	30.9	30.9	30.9	24.831
sp|P22087|FBRL_HUMAN;tr|M0QXL5|M0QXL5_HUMAN;tr|M0R299|M0R299_HUMAN;tr|M0R2Q4|M0R2Q4_HUMAN;tr|M0R0P1|M0R0P1_HUMAN;tr|M0R2U2|M0R2U2_HUMAN;tr|M0R2B0|M0R2B0_HUMAN;tr|M0R1H0|M0R1H0_HUMAN;tr|A0A0D9SFM2|A0A0D9SFM2_HUMAN;tr|M0QXC9|M0QXC9_HUMAN	sp|P22087|FBRL_HUMAN;tr|M0QXL5|M0QXL5_HUMAN;tr|M0R299|M0R299_HUMAN;tr|M0R2Q4|M0R2Q4_HUMAN;tr|M0R0P1|M0R0P1_HUMAN;tr|M0R2U2|M0R2U2_HUMAN;tr|M0R2B0|M0R2B0_HUMAN;tr|M0R1H0|M0R1H0_HUMAN	2.33071	7796600	2.69647	3.01332	4226400	1	5428200	5668500	9850500	7796600	14637000	17081000	11;10;9;9;8;7;7;7;1;1	11;10;9;9;8;7;7;7;1;1	10;9;8;8;7;7;7;7;1;1	sp|P22087|FBRL_HUMAN rRNA 2-O-methyltransferase fibrillarin OS=Homo sapiens GN=FBL PE=1 SV=2;tr|M0QXL5|M0QXL5_HUMAN rRNA 2-O-methyltransferase fibrillarin (Fragment) OS=Homo sapiens GN=FBL PE=1 SV=1;tr|M0R299|M0R299_HUMAN rRNA 2-O-methyltransferase fibr	10	11	11	10	3	1	3	5	6	7	11	8	3	1	3	5	6	7	11	8	2	1	2	4	5	6	10	7	36.1	36.1	32.7	33.784
sp|O95478|NSA2_HUMAN;tr|A0A0A0MQZ6|A0A0A0MQZ6_HUMAN;tr|H0YAI9|H0YAI9_HUMAN	sp|O95478|NSA2_HUMAN;tr|A0A0A0MQZ6|A0A0A0MQZ6_HUMAN	2970000	3742500	2.5881	3.00968	1	1	1871100	1549500	2970000	3742500	4842600	4663500	3;3;1	3;3;1	3;3;1	sp|O95478|NSA2_HUMAN Ribosome biogenesis protein NSA2 homolog OS=Homo sapiens GN=NSA2 PE=1 SV=1;tr|A0A0A0MQZ6|A0A0A0MQZ6_HUMAN Ribosome biogenesis protein NSA2 homolog OS=Homo sapiens GN=NSA2 PE=1 SV=1	3	3	3	3	1	1	2	2	2	2	3	2	1	1	2	2	2	2	3	2	1	1	2	2	2	2	3	2	1	1	1	337.39
sp|P05387|RLA2_HUMAN;tr|H0YDD8|H0YDD8_HUMAN	sp|P05387|RLA2_HUMAN;tr|H0YDD8|H0YDD8_HUMAN	2.09239	1.4791	2.82596	2.92695	48251000	45974000	53182000	56458000	100960000	68000000	150290000	165250000	9;5	9;5	8;4	sp|P05387|RLA2_HUMAN 60S acidic ribosomal protein P2 OS=Homo sapiens GN=RPLP2 PE=1 SV=1;tr|H0YDD8|H0YDD8_HUMAN 60S acidic ribosomal protein P2 (Fragment) OS=Homo sapiens GN=RPLP2 PE=1 SV=1	2	9	9	8	5	3	6	7	7	7	7	9	5	3	6	7	7	7	7	9	5	3	6	7	7	7	6	8	88.7	88.7	73.9	11.665
sp|Q8TDN6|BRX1_HUMAN	sp|Q8TDN6|BRX1_HUMAN	2.56756	3.98758	2.79322	2.91481	4814300	4652200	7549700	5363300	12361000	18551000	21088000	15633000	11	11	11	sp|Q8TDN6|BRX1_HUMAN Ribosome biogenesis protein BRX1 homolog OS=Homo sapiens GN=BRIX1 PE=1 SV=2	1	11	11	11	3	2	3	4	8	8	8	9	3	2	3	4	8	8	8	9	3	2	3	4	8	8	8	9	41.6	41.6	41.6	41.401
sp|Q9GZL7|WDR12_HUMAN	sp|Q9GZL7|WDR12_HUMAN	3312800	2583700	1.66636	2.89149	1	1	2390300	1518700	3312800	2583700	3983100	4391300	6	6	6	sp|Q9GZL7|WDR12_HUMAN Ribosome biogenesis protein WDR12 OS=Homo sapiens GN=WDR12 PE=1 SV=2	1	6	6	6	1	0	3	2	6	4	6	5	1	0	3	2	6	4	6	5	1	0	3	2	6	4	6	5	17.7	17.7	17.7	47.707
sp|Q99848|EBP2_HUMAN;tr|Q6ZWE5|Q6ZWE5_HUMAN	sp|Q99848|EBP2_HUMAN;tr|Q6ZWE5|Q6ZWE5_HUMAN	1.71151	1.53388	2.37555	2.77939	18718000	20102000	16866000	15403000	32036000	30834000	40066000	42811000	14;14	14;14	14;14	sp|Q99848|EBP2_HUMAN Probable rRNA-processing protein EBP2 OS=Homo sapiens GN=EBNA1BP2 PE=1 SV=2;tr|Q6ZWE5|Q6ZWE5_HUMAN Monocarboxylate transporter 14 (Fragment) OS=Homo sapiens GN=SLC16A14 PE=2 SV=1	2	14	14	14	8	8	9	8	11	9	12	13	8	8	9	8	11	9	12	13	8	8	9	8	11	9	12	13	22.2	22.2	22.2	69.317
sp|Q96PK6|RBM14_HUMAN	sp|Q96PK6|RBM14_HUMAN	3595900	2504400	2.56795	2.74246	1	1	1916200	1599000	3595900	2504400	4920700	4385200	12	12	12	sp|Q96PK6|RBM14_HUMAN RNA-binding protein 14 OS=Homo sapiens GN=RBM14 PE=1 SV=2	1	12	12	12	1	1	3	2	5	4	11	8	1	1	3	2	5	4	11	8	1	1	3	2	5	4	11	8	22	22	22	69.491
sp|Q9Y2X3|NOP58_HUMAN;tr|H7BZ72|H7BZ72_HUMAN;tr|F8WED0|F8WED0_HUMAN	sp|Q9Y2X3|NOP58_HUMAN	2.99429	6141700	3.53811	2.64988	2347400	1	4038600	4542100	7028800	6141700	14289000	12036000	11;2;1	11;2;1	11;2;1	sp|Q9Y2X3|NOP58_HUMAN Nucleolar protein 58 OS=Homo sapiens GN=NOP58 PE=1 SV=1	3	11	11	11	2	0	3	4	5	6	8	11	2	0	3	4	5	6	8	11	2	0	3	4	5	6	8	11	29.3	29.3	29.3	59.578
tr|D6RIY6|D6RIY6_HUMAN;sp|Q06265|EXOS9_HUMAN;tr|H0Y9L5|H0Y9L5_HUMAN;tr|D6R905|D6R905_HUMAN;tr|D6RA17|D6RA17_HUMAN	tr|D6RIY6|D6RIY6_HUMAN;sp|Q06265|EXOS9_HUMAN	1	1	1703100	2.61079	1	1	1	976180	1	1	1703100	2548600	3;3;1;1;1	3;3;1;1;1	3;3;1;1;1	tr|D6RIY6|D6RIY6_HUMAN Exosome complex component RRP45 OS=Homo sapiens GN=EXOSC9 PE=1 SV=1;sp|Q06265|EXOS9_HUMAN Exosome complex component RRP45 OS=Homo sapiens GN=EXOSC9 PE=1 SV=3	5	3	3	3	1	1	1	2	1	1	2	3	1	1	1	2	1	1	2	3	1	1	1	2	1	1	2	3	9.5	9.5	9.5	46.977
sp|P46087|NOP2_HUMAN;tr|A0A087WV73|A0A087WV73_HUMAN;tr|F5GWB7|F5GWB7_HUMAN;tr|F5H5X6|F5H5X6_HUMAN;tr|F5H709|F5H709_HUMAN;tr|F5GYR3|F5GYR3_HUMAN;tr|F5H359|F5H359_HUMAN;tr|F5H8G6|F5H8G6_HUMAN	sp|P46087|NOP2_HUMAN;tr|A0A087WV73|A0A087WV73_HUMAN	1.66608	1.14831	2.71151	2.54982	7641900	9026300	6230100	7417000	12732000	10365000	16893000	18912000	18;18;4;4;4;3;2;2	18;18;4;4;4;3;2;2	18;18;4;4;4;3;2;2	sp|P46087|NOP2_HUMAN Probable 28S rRNA (cytosine(4447)-C(5))-methyltransferase OS=Homo sapiens GN=NOP2 PE=1 SV=2;tr|A0A087WV73|A0A087WV73_HUMAN Probable 28S rRNA (cytosine(4447)-C(5))-methyltransferase OS=Homo sapiens GN=NOP2 PE=1 SV=1	8	18	18	18	6	5	8	7	11	10	13	13	6	5	8	7	11	10	13	13	6	5	8	7	11	10	13	13	23.9	23.9	23.9	89.301
sp|P46778|RL21_HUMAN;tr|G3V1B3|G3V1B3_HUMAN;tr|M0R181|M0R181_HUMAN;tr|M0R3I5|M0R3I5_HUMAN	sp|P46778|RL21_HUMAN;tr|G3V1B3|G3V1B3_HUMAN;tr|M0R181|M0R181_HUMAN	2.14291	2.03348	3.75536	2.52795	20650000	15085000	16428000	21875000	44251000	30675000	61693000	55299000	9;5;5;1	9;5;5;1	9;5;5;1	sp|P46778|RL21_HUMAN 60S ribosomal protein L21 OS=Homo sapiens GN=RPL21 PE=1 SV=2;tr|G3V1B3|G3V1B3_HUMAN 60S ribosomal protein L21 OS=Homo sapiens GN=RPL21 PE=1 SV=1;tr|M0R181|M0R181_HUMAN 60S ribosomal protein L21 (Fragment) OS=Homo sapiens GN=RPL21 PE=1	4	9	9	9	3	2	2	3	7	5	8	5	3	2	2	3	7	5	8	5	3	2	2	3	7	5	8	5	44.4	44.4	44.4	18.565
sp|P11940|PABP1_HUMAN;tr|A0A087WTT1|A0A087WTT1_HUMAN;tr|E7ERJ7|E7ERJ7_HUMAN;tr|E7EQV3|E7EQV3_HUMAN;tr|H0YAR2|H0YAR2_HUMAN;tr|H0YAP2|H0YAP2_HUMAN;sp|Q9H361|PABP3_HUMAN;tr|E5RH24|E5RH24_HUMAN;tr|H0YBN4|H0YBN4_HUMAN;tr|E5RJB9|E5RJB9_HUMAN;tr|H0YB86|H0YB86_HUMAN;tr|E5RGH3|E5RGH3_HUMAN;sp|Q4VXU2|PAP1L_HUMAN;tr|B1ANR1|B1ANR1_HUMAN;tr|E5RHG7|E5RHG7_HUMAN;tr|H0YAS7|H0YAS7_HUMAN;tr|H0YAS6|H0YAS6_HUMAN;tr|…	sp|P11940|PABP1_HUMAN;tr|A0A087WTT1|A0A087WTT1_HUMAN;tr|E7ERJ7|E7ERJ7_HUMAN;tr|E7EQV3|E7EQV3_HUMAN;tr|H0YAR2|H0YAR2_HUMAN	2.77843	4042100	2.57621	2.48145	1850400	1	3476700	4378900	5141200	4042100	8956700	10866000	12;12;11;11;7;5;5;4;4;4;3;3;3;2;2;1;1;1;1;1;1;1;1;1	12;12;11;11;7;5;5;4;4;4;3;3;3;2;2;1;1;1;1;1;1;1;1;1	9;9;8;8;6;5;5;2;1;2;3;1;3;0;1;1;1;1;1;1;1;0;1;1	sp|P11940|PABP1_HUMAN Polyadenylate-binding protein 1 OS=Homo sapiens GN=PABPC1 PE=1 SV=2;tr|A0A087WTT1|A0A087WTT1_HUMAN Polyadenylate-binding protein OS=Homo sapiens GN=PABPC1 PE=1 SV=1;tr|E7ERJ7|E7ERJ7_HUMAN Polyadenylate-binding protein OS=Homo sapiens	24	12	12	9	2	1	4	3	6	7	9	11	2	1	4	3	6	7	9	11	2	1	3	3	4	4	6	8	20.3	20.3	14.6	70.67
sp|P36578|RL4_HUMAN;tr|H3BM89|H3BM89_HUMAN;tr|H3BTP7|H3BTP7_HUMAN;tr|H3BU31|H3BU31_HUMAN	sp|P36578|RL4_HUMAN;tr|H3BM89|H3BM89_HUMAN;tr|H3BTP7|H3BTP7_HUMAN	1.58923	2.00934	2.00566	2.45824	132630000	101760000	127100000	107150000	210780000	204470000	254920000	263400000	18;12;9;7	18;12;9;7	18;12;9;7	sp|P36578|RL4_HUMAN 60S ribosomal protein L4 OS=Homo sapiens GN=RPL4 PE=1 SV=5;tr|H3BM89|H3BM89_HUMAN 60S ribosomal protein L4 OS=Homo sapiens GN=RPL4 PE=1 SV=1;tr|H3BTP7|H3BTP7_HUMAN 60S ribosomal protein L4 (Fragment) OS=Homo sapiens GN=RPL4 PE=1 SV=1	4	18	18	18	11	13	9	12	13	15	15	13	11	13	9	12	13	15	15	13	11	13	9	12	13	15	15	13	41.5	41.5	41.5	47.697
sp|Q9BVP2|GNL3_HUMAN;tr|C9JYH9|C9JYH9_HUMAN;tr|C9JZT7|C9JZT7_HUMAN;tr|B4DMU5|B4DMU5_HUMAN	sp|Q9BVP2|GNL3_HUMAN	1.52092	2.09928	1.64232	2.42483	6520600	4951700	7283600	5587200	9917300	10395000	11962000	13548000	13;1;1;1	13;1;1;1	13;1;1;1	sp|Q9BVP2|GNL3_HUMAN Guanine nucleotide-binding protein-like 3 OS=Homo sapiens GN=GNL3 PE=1 SV=2	4	13	13	13	3	2	5	5	7	9	9	9	3	2	5	5	7	9	9	9	3	2	5	5	7	9	9	9	30.4	30.4	30.4	61.992
sp|P61254|RL26_HUMAN;tr|J3QRI7|J3QRI7_HUMAN;tr|J3QQQ9|J3QQQ9_HUMAN;tr|J3QQV1|J3QQV1_HUMAN;tr|J3QRC4|J3QRC4_HUMAN;tr|J3KTJ8|J3KTJ8_HUMAN;tr|E5RIT6|E5RIT6_HUMAN;sp|Q9UNX3|RL26L_HUMAN;tr|J3KS10|J3KS10_HUMAN;tr|J3KSS0|J3KSS0_HUMAN;tr|E5RHH1|E5RHH1_HUMAN	sp|P61254|RL26_HUMAN;tr|J3QRI7|J3QRI7_HUMAN;tr|J3QQQ9|J3QQQ9_HUMAN;tr|J3QQV1|J3QQV1_HUMAN;tr|J3QRC4|J3QRC4_HUMAN;tr|J3KTJ8|J3KTJ8_HUMAN;tr|E5RIT6|E5RIT6_HUMAN;sp|Q9UNX3|RL26L_HUMAN	3675900	1	2.15157	2.37352	1	1	1683100	1406600	3675900	1	3621300	3338600	6;5;5;5;5;4;4;4;2;2;1	6;5;5;5;5;4;4;4;2;2;1	6;5;5;5;5;4;4;4;2;2;1	sp|P61254|RL26_HUMAN 60S ribosomal protein L26 OS=Homo sapiens GN=RPL26 PE=1 SV=1;tr|J3QRI7|J3QRI7_HUMAN 60S ribosomal protein L26 (Fragment) OS=Homo sapiens GN=RPL26 PE=4 SV=1;tr|J3QQQ9|J3QQQ9_HUMAN Uncharacterized protein OS=Homo sapiens PE=4 SV=1;tr|J3Q	11	6	6	6	1	1	2	2	3	1	4	4	1	1	2	2	3	1	4	4	1	1	2	2	3	1	4	4	38.6	38.6	38.6	17.258
tr|Q5JR95|Q5JR95_HUMAN;sp|P62241|RS8_HUMAN	tr|Q5JR95|Q5JR95_HUMAN;sp|P62241|RS8_HUMAN	1.71115	1.33202	2.32536	2.33086	5780500	5456000	6288500	5940300	9891300	7267500	14623000	13846000	6;6	6;6	6;6	tr|Q5JR95|Q5JR95_HUMAN 40S ribosomal protein S8 OS=Homo sapiens GN=RPS8 PE=1 SV=1;sp|P62241|RS8_HUMAN 40S ribosomal protein S8 OS=Homo sapiens GN=RPS8 PE=1 SV=2	2	6	6	6	2	3	3	4	3	4	5	4	2	3	3	4	3	4	5	4	2	3	3	4	3	4	5	4	36.7	36.7	36.7	21.879
sp|P49207|RL34_HUMAN	sp|P49207|RL34_HUMAN	1.30859	1.19759	1.89513	2.32069	34765000	32659000	29093000	22854000	45493000	39112000	55135000	53037000	5	5	5	sp|P49207|RL34_HUMAN 60S ribosomal protein L34 OS=Homo sapiens GN=RPL34 PE=1 SV=3	1	5	5	5	4	4	4	3	5	5	5	5	4	4	4	3	5	5	5	5	4	4	4	3	5	5	5	5	22.2	22.2	22.2	13.293
sp|P18124|RL7_HUMAN;tr|A8MUD9|A8MUD9_HUMAN;tr|C9JZ88|C9JZ88_HUMAN;tr|C9JIJ5|C9JIJ5_HUMAN	sp|P18124|RL7_HUMAN;tr|A8MUD9|A8MUD9_HUMAN	1.56787	1.51966	2.47433	2.31594	130610000	127410000	112200000	108250000	204780000	193620000	277620000	250700000	16;13;4;4	16;13;4;4	16;13;4;4	sp|P18124|RL7_HUMAN 60S ribosomal protein L7 OS=Homo sapiens GN=RPL7 PE=1 SV=1;tr|A8MUD9|A8MUD9_HUMAN 60S ribosomal protein L7 OS=Homo sapiens GN=RPL7 PE=1 SV=1	4	16	16	16	11	13	11	13	13	11	13	11	11	13	11	13	13	11	13	11	11	13	11	13	13	11	13	11	45.2	45.2	45.2	29.225
tr|A0A087X1S2|A0A087X1S2_HUMAN;sp|P67809|YBOX1_HUMAN;tr|H0Y449|H0Y449_HUMAN;sp|P16989|YBOX3_HUMAN;tr|A0A0D9SEI8|A0A0D9SEI8_HUMAN;tr|C9J5V9|C9J5V9_HUMAN;sp|Q9Y2T7|YBOX2_HUMAN	tr|A0A087X1S2|A0A087X1S2_HUMAN;sp|P67809|YBOX1_HUMAN;tr|H0Y449|H0Y449_HUMAN;sp|P16989|YBOX3_HUMAN	2357000	1.18914	1.80066	2.30959	1	1821400	1391600	1340800	2357000	2165900	2505800	3096700	4;4;3;2;1;1;1	4;4;3;2;1;1;1	4;4;3;2;1;1;1	tr|A0A087X1S2|A0A087X1S2_HUMAN Nuclease-sensitive element-binding protein 1 OS=Homo sapiens GN=YBX1 PE=1 SV=2;sp|P67809|YBOX1_HUMAN Nuclease-sensitive element-binding protein 1 OS=Homo sapiens GN=YBX1 PE=1 SV=3;tr|H0Y449|H0Y449_HUMAN Nuclease-sensitive ele	7	4	4	4	1	2	2	2	3	3	3	4	1	2	2	2	3	3	3	4	1	2	2	2	3	3	3	4	25.6	25.6	25.6	34.656
tr|M0R3D6|M0R3D6_HUMAN;tr|M0R1A7|M0R1A7_HUMAN;sp|Q02543|RL18A_HUMAN;tr|M0R117|M0R117_HUMAN;tr|M0R0P7|M0R0P7_HUMAN	tr|M0R3D6|M0R3D6_HUMAN;tr|M0R1A7|M0R1A7_HUMAN;sp|Q02543|RL18A_HUMAN;tr|M0R117|M0R117_HUMAN;tr|M0R0P7|M0R0P7_HUMAN	1.37573	1.54372	1.74815	2.28949	40404000	36771000	43228000	27915000	55585000	56764000	75569000	63911000	10;10;10;9;7	10;10;10;9;7	10;10;10;9;7	tr|M0R3D6|M0R3D6_HUMAN 60S ribosomal protein L18a (Fragment) OS=Homo sapiens GN=RPL18A PE=1 SV=1;tr|M0R1A7|M0R1A7_HUMAN 60S ribosomal protein L18a OS=Homo sapiens GN=RPL18A PE=1 SV=1;sp|Q02543|RL18A_HUMAN 60S ribosomal protein L18a OS=Homo sapiens GN=RPL18	5	10	10	10	7	5	8	5	6	8	9	7	7	5	8	5	6	8	9	7	7	5	8	5	6	8	9	7	56	56	56	16.714
tr|D3YTB1|D3YTB1_HUMAN;sp|P62910|RL32_HUMAN;tr|F8W727|F8W727_HUMAN;tr|D3YTI8|D3YTI8_HUMAN	tr|D3YTB1|D3YTB1_HUMAN;sp|P62910|RL32_HUMAN;tr|F8W727|F8W727_HUMAN	1.53728	1.40775	2.65804	2.28726	10114000	11723000	10858000	10137000	15548000	16503000	28861000	23186000	9;9;9;1	9;9;9;1	9;9;9;1	tr|D3YTB1|D3YTB1_HUMAN 60S ribosomal protein L32 (Fragment) OS=Homo sapiens GN=RPL32 PE=1 SV=1;sp|P62910|RL32_HUMAN 60S ribosomal protein L32 OS=Homo sapiens GN=RPL32 PE=1 SV=2;tr|F8W727|F8W727_HUMAN 60S ribosomal protein L32 OS=Homo sapiens GN=RPL32 PE=1	4	9	9	9	4	3	4	3	4	6	8	7	4	3	4	3	4	6	8	7	4	3	4	3	4	6	8	7	33.8	33.8	33.8	15.616
sp|P62829|RL23_HUMAN;tr|C9JD32|C9JD32_HUMAN;tr|J3KT29|J3KT29_HUMAN;tr|B9ZVP7|B9ZVP7_HUMAN;tr|J3KTJ3|J3KTJ3_HUMAN	sp|P62829|RL23_HUMAN;tr|C9JD32|C9JD32_HUMAN;tr|J3KT29|J3KT29_HUMAN;tr|B9ZVP7|B9ZVP7_HUMAN	20023000	1.61365	2.79939	2.25625	1	11249000	9563500	10755000	20023000	18152000	26772000	24266000	7;6;6;4;3	7;6;6;4;3	5;4;4;4;1	sp|P62829|RL23_HUMAN 60S ribosomal protein L23 OS=Homo sapiens GN=RPL23 PE=1 SV=1;tr|C9JD32|C9JD32_HUMAN 60S ribosomal protein L23 (Fragment) OS=Homo sapiens GN=RPL23 PE=1 SV=1;tr|J3KT29|J3KT29_HUMAN 60S ribosomal protein L23 OS=Homo sapiens GN=RPL23 PE=1	5	7	7	5	1	3	2	3	4	5	7	5	1	3	2	3	4	5	7	5	1	3	2	3	3	4	5	3	46.4	46.4	40	14.865
sp|Q8IY81|SPB1_HUMAN;tr|J3KS74|J3KS74_HUMAN;tr|J3QSE2|J3QSE2_HUMAN;tr|J3KS36|J3KS36_HUMAN;tr|J3QRS5|J3QRS5_HUMAN;tr|J3QR05|J3QR05_HUMAN	sp|Q8IY81|SPB1_HUMAN	1.62873	1.83603	2.41528	2.24833	10289000	9155100	10063000	11823000	16758000	16809000	24305000	26582000	21;2;2;2;1;1	21;2;2;2;1;1	21;2;2;2;1;1	sp|Q8IY81|SPB1_HUMAN pre-rRNA processing protein FTSJ3 OS=Homo sapiens GN=FTSJ3 PE=1 SV=2	6	21	21	21	6	8	11	11	16	14	18	15	6	8	11	11	16	14	18	15	6	8	11	11	16	14	18	15	31.2	31.2	31.2	96.557
sp|P46779|RL28_HUMAN;tr|H0YKD8|H0YKD8_HUMAN;tr|H0YMF4|H0YMF4_HUMAN;tr|H0YLP6|H0YLP6_HUMAN	sp|P46779|RL28_HUMAN;tr|H0YKD8|H0YKD8_HUMAN;tr|H0YMF4|H0YMF4_HUMAN;tr|H0YLP6|H0YLP6_HUMAN	1.05991	1.52562	1.92747	2.21696	33531000	28199000	30816000	22377000	35540000	43021000	59397000	49609000	9;8;6;5	9;8;6;5	9;8;6;5	sp|P46779|RL28_HUMAN 60S ribosomal protein L28 OS=Homo sapiens GN=RPL28 PE=1 SV=3;tr|H0YKD8|H0YKD8_HUMAN 60S ribosomal protein L28 OS=Homo sapiens GN=RPL28 PE=1 SV=1;tr|H0YMF4|H0YMF4_HUMAN 60S ribosomal protein L28 OS=Homo sapiens GN=RPL28 PE=1 SV=1;tr|H0Y	4	9	9	9	5	5	5	4	6	5	6	5	5	5	5	4	6	5	6	5	5	5	5	4	6	5	6	5	51.8	51.8	51.8	15.747
sp|Q9H0D6|XRN2_HUMAN	sp|Q9H0D6|XRN2_HUMAN	2.16177	2.27343	2.29124	2.20304	6640400	5294200	9950500	8253600	14355000	12036000	22799000	18183000	21	21	21	sp|Q9H0D6|XRN2_HUMAN 5-3 exoribonuclease 2 OS=Homo sapiens GN=XRN2 PE=1 SV=1	1	21	21	21	5	3	8	5	14	12	18	15	5	3	8	5	14	12	18	15	5	3	8	5	14	12	18	15	24.9	24.9	24.9	108.58
tr|K7ELC7|K7ELC7_HUMAN;sp|P61353|RL27_HUMAN;tr|K7EQQ9|K7EQQ9_HUMAN	tr|K7ELC7|K7ELC7_HUMAN;sp|P61353|RL27_HUMAN;tr|K7EQQ9|K7EQQ9_HUMAN	1.53499	1.49454	2.38091	2.18858	65212000	51968000	48746000	50407000	100100000	77668000	116060000	110320000	9;9;7	9;9;7	9;9;7	tr|K7ELC7|K7ELC7_HUMAN 60S ribosomal protein L27 (Fragment) OS=Homo sapiens GN=RPL27 PE=1 SV=1;sp|P61353|RL27_HUMAN 60S ribosomal protein L27 OS=Homo sapiens GN=RPL27 PE=1 SV=2;tr|K7EQQ9|K7EQQ9_HUMAN 60S ribosomal protein L27 OS=Homo sapiens GN=RPL27 PE=1	3	9	9	9	6	5	5	5	8	7	6	8	6	5	5	5	8	7	6	8	6	5	5	5	8	7	6	8	45.8	45.8	45.8	16.359
sp|P61313|RL15_HUMAN;tr|E7EQV9|E7EQV9_HUMAN;tr|E7ENU7|E7ENU7_HUMAN;tr|E7EX53|E7EX53_HUMAN;tr|E7ERA2|E7ERA2_HUMAN	sp|P61313|RL15_HUMAN;tr|E7EQV9|E7EQV9_HUMAN;tr|E7ENU7|E7ENU7_HUMAN;tr|E7EX53|E7EX53_HUMAN	1.77086	1.5277	2.23068	2.14017	63918000	60779000	68867000	56117000	113190000	92852000	153620000	120100000	14;11;10;7;2	14;11;10;7;2	14;11;10;7;2	sp|P61313|RL15_HUMAN 60S ribosomal protein L15 OS=Homo sapiens GN=RPL15 PE=1 SV=2;tr|E7EQV9|E7EQV9_HUMAN Ribosomal protein L15 (Fragment) OS=Homo sapiens GN=RPL15 PE=1 SV=1;tr|E7ENU7|E7ENU7_HUMAN Ribosomal protein L15 (Fragment) OS=Homo sapiens GN=RPL15 PE	5	14	14	14	10	9	9	9	10	10	10	11	10	9	9	9	10	10	10	11	10	9	9	9	10	10	10	11	51.5	51.5	51.5	24.146
sp|P26373|RL13_HUMAN;tr|J3QSB4|J3QSB4_HUMAN;tr|H3BTH3|H3BTH3_HUMAN;tr|J3KS98|J3KS98_HUMAN;tr|H3BUK8|H3BUK8_HUMAN	sp|P26373|RL13_HUMAN;tr|J3QSB4|J3QSB4_HUMAN	2.04839	1.6088	1.88382	2.12816	43110000	45189000	49959000	38513000	88306000	72700000	94114000	81962000	13;7;3;3;1	13;7;3;3;1	13;7;3;3;1	sp|P26373|RL13_HUMAN 60S ribosomal protein L13 OS=Homo sapiens GN=RPL13 PE=1 SV=4;tr|J3QSB4|J3QSB4_HUMAN 60S ribosomal protein L13 (Fragment) OS=Homo sapiens GN=RPL13 PE=1 SV=1	5	13	13	13	7	7	7	6	8	9	11	10	7	7	7	6	8	9	11	10	7	7	7	6	8	9	11	10	51.7	51.7	51.7	24.261
sp|P62424|RL7A_HUMAN;tr|Q5T8U3|Q5T8U3_HUMAN;tr|Q5T8U2|Q5T8U2_HUMAN	sp|P62424|RL7A_HUMAN;tr|Q5T8U3|Q5T8U3_HUMAN	1.19214	1.4207	2.22289	2.11274	113460000	103470000	101980000	103600000	135260000	147000000	226690000	218880000	13;9;6	13;9;6	13;9;6	sp|P62424|RL7A_HUMAN 60S ribosomal protein L7a OS=Homo sapiens GN=RPL7A PE=1 SV=2;tr|Q5T8U3|Q5T8U3_HUMAN 60S ribosomal protein L7a (Fragment) OS=Homo sapiens GN=RPL7A PE=1 SV=1	3	13	13	13	12	10	11	11	9	11	12	11	12	10	11	11	9	11	12	11	12	10	11	11	9	11	12	11	33.8	33.8	33.8	29.995
tr|C9J4Z3|C9J4Z3_HUMAN;sp|P61513|RL37A_HUMAN;tr|M0R0A1|M0R0A1_HUMAN;tr|Q6P4E4|Q6P4E4_HUMAN;tr|E9PEL3|E9PEL3_HUMAN;tr|M0R2L6|M0R2L6_HUMAN;tr|G5E9R3|G5E9R3_HUMAN;sp|A6NKH3|RL37L_HUMAN	tr|C9J4Z3|C9J4Z3_HUMAN;sp|P61513|RL37A_HUMAN;tr|M0R0A1|M0R0A1_HUMAN;tr|Q6P4E4|Q6P4E4_HUMAN;tr|E9PEL3|E9PEL3_HUMAN;tr|M0R2L6|M0R2L6_HUMAN;tr|G5E9R3|G5E9R3_HUMAN	1.5457	1.87609	2.54501	2.10381	3850300	4232000	3131300	3145200	5951400	7939600	7969200	6616900	4;4;2;2;2;2;2;1	4;4;2;2;2;2;2;1	4;4;2;2;2;2;2;1	tr|C9J4Z3|C9J4Z3_HUMAN 60S ribosomal protein L37a OS=Homo sapiens GN=RPL37A PE=1 SV=1;sp|P61513|RL37A_HUMAN 60S ribosomal protein L37a OS=Homo sapiens GN=RPL37A PE=1 SV=2;tr|M0R0A1|M0R0A1_HUMAN 60S ribosomal protein L37a OS=Homo sapiens GN=RPL37A PE=1 SV=1	8	4	4	4	2	2	2	2	2	3	4	2	2	2	2	2	2	3	4	2	2	2	2	2	2	3	4	2	50	50	50	7.624
sp|Q9Y4W2|LAS1L_HUMAN	sp|Q9Y4W2|LAS1L_HUMAN	2153300	2991700	3828300	2.07095	1	1	1	1675800	2153300	2991700	3828300	3470500	7	7	7	sp|Q9Y4W2|LAS1L_HUMAN Ribosomal biogenesis protein LAS1L OS=Homo sapiens GN=LAS1L PE=1 SV=2	1	7	7	7	0	0	1	2	5	3	3	6	0	0	1	2	5	3	3	6	0	0	1	2	5	3	3	6	11	11	11	83.064
sp|Q09161|NCBP1_HUMAN;tr|X6R941|X6R941_HUMAN	sp|Q09161|NCBP1_HUMAN	3082400	2548500	1.35912	2.05347	1	1	2561000	2324700	3082400	2548500	3480700	4773700	8;2	8;2	8;2	sp|Q09161|NCBP1_HUMAN Nuclear cap-binding protein subunit 1 OS=Homo sapiens GN=NCBP1 PE=1 SV=1	2	8	8	8	1	1	3	3	6	3	7	3	1	1	3	3	6	3	7	3	1	1	3	3	6	3	7	3	10.5	10.5	10.5	91.838
tr|E7EPB3|E7EPB3_HUMAN;sp|P50914|RL14_HUMAN	tr|E7EPB3|E7EPB3_HUMAN;sp|P50914|RL14_HUMAN	1.09134	1.16712	1.53469	2.02704	36763000	38422000	37139000	35579000	40121000	44843000	56997000	72120000	5;5	5;5	5;5	tr|E7EPB3|E7EPB3_HUMAN 60S ribosomal protein L14 OS=Homo sapiens GN=RPL14 PE=1 SV=1;sp|P50914|RL14_HUMAN 60S ribosomal protein L14 OS=Homo sapiens GN=RPL14 PE=1 SV=4	2	5	5	5	2	2	2	2	4	4	3	4	2	2	2	2	4	4	3	4	2	2	2	2	4	4	3	4	37.9	37.9	37.9	14.558
sp|Q9Y3U8|RL36_HUMAN;tr|J3QSB5|J3QSB5_HUMAN;tr|J3KTD3|J3KTD3_HUMAN	sp|Q9Y3U8|RL36_HUMAN	1.76994	1.28138	2.49566	1.96633	16135000	18029000	14754000	13664000	28558000	23102000	36821000	26868000	5;2;1	5;2;1	5;2;1	sp|Q9Y3U8|RL36_HUMAN 60S ribosomal protein L36 OS=Homo sapiens GN=RPL36 PE=1 SV=3	3	5	5	5	3	4	5	5	5	5	5	5	3	4	5	5	5	5	5	5	3	4	5	5	5	5	5	5	30.5	30.5	30.5	12.254
sp|Q02878|RL6_HUMAN;tr|F8VZ45|F8VZ45_HUMAN;tr|U3KQR5|U3KQR5_HUMAN;tr|F8VR69|F8VR69_HUMAN;tr|F8VZA3|F8VZA3_HUMAN;tr|F8VWR1|F8VWR1_HUMAN;tr|F8VU16|F8VU16_HUMAN	sp|Q02878|RL6_HUMAN	1.25509	1.74316	2.15466	1.95527	139560000	107500000	110310000	107530000	175160000	187390000	237680000	210250000	18;6;6;4;2;2;2	18;6;6;4;2;2;2	18;6;6;4;2;2;2	sp|Q02878|RL6_HUMAN 60S ribosomal protein L6 OS=Homo sapiens GN=RPL6 PE=1 SV=3	7	18	18	18	12	11	11	14	13	13	13	14	12	11	11	14	13	13	13	14	12	11	11	14	13	13	13	14	46.5	46.5	46.5	32.728
sp|Q9NXF1|TEX10_HUMAN;tr|A0A0A0MSR3|A0A0A0MSR3_HUMAN	sp|Q9NXF1|TEX10_HUMAN	4835900	6010300	2.62312	1.95215	1	1	2547500	2397000	4835900	6010300	6682400	4679300	17;2	17;2	17;2	sp|Q9NXF1|TEX10_HUMAN Testis-expressed sequence 10 protein OS=Homo sapiens GN=TEX10 PE=1 SV=2	2	17	17	17	0	0	2	3	9	9	15	11	0	0	2	3	9	9	15	11	0	0	2	3	9	9	15	11	25.8	25.8	25.8	105.67
sp|P39023|RL3_HUMAN;tr|G5E9G0|G5E9G0_HUMAN;tr|H7C422|H7C422_HUMAN;tr|H7C3M2|H7C3M2_HUMAN;tr|B5MCW2|B5MCW2_HUMAN;tr|F8WCR1|F8WCR1_HUMAN;sp|Q92901|RL3L_HUMAN	sp|P39023|RL3_HUMAN;tr|G5E9G0|G5E9G0_HUMAN;tr|H7C422|H7C422_HUMAN;tr|H7C3M2|H7C3M2_HUMAN	1.26319	1.92437	2.0358	1.94826	46412000	42257000	46511000	38886000	58627000	81318000	94687000	75760000	21;17;13;12;10;5;1	21;17;13;12;10;5;1	21;17;13;12;10;5;1	sp|P39023|RL3_HUMAN 60S ribosomal protein L3 OS=Homo sapiens GN=RPL3 PE=1 SV=2;tr|G5E9G0|G5E9G0_HUMAN 60S ribosomal protein L3 OS=Homo sapiens GN=RPL3 PE=1 SV=1;tr|H7C422|H7C422_HUMAN 60S ribosomal protein L3 (Fragment) OS=Homo sapiens GN=RPL3 PE=1 SV=1;tr	7	21	21	21	12	10	12	11	13	13	14	18	12	10	12	11	13	13	14	18	12	10	12	11	13	13	14	18	44.2	44.2	44.2	46.108
sp|Q9NR30|DDX21_HUMAN	sp|Q9NR30|DDX21_HUMAN	1.43708	1.1039	1.65786	1.89219	10339000	12339000	12416000	10045000	14858000	13621000	20584000	19007000	20	20	18	sp|Q9NR30|DDX21_HUMAN Nucleolar RNA helicase 2 OS=Homo sapiens GN=DDX21 PE=1 SV=5	1	20	20	18	8	8	6	8	11	13	12	12	8	8	6	8	11	13	12	12	6	6	5	6	10	12	11	11	30.7	30.7	27.2	87.343
sp|P62888|RL30_HUMAN;tr|E5RI99|E5RI99_HUMAN;tr|A0A0C4DH44|A0A0C4DH44_HUMAN;tr|E5RJH3|E5RJH3_HUMAN;tr|A0A0B4J213|A0A0B4J213_HUMAN	sp|P62888|RL30_HUMAN;tr|E5RI99|E5RI99_HUMAN;tr|A0A0C4DH44|A0A0C4DH44_HUMAN	1.66899	1.62002	2.85177	1.88767	14214000	16672000	14565000	12686000	23723000	27009000	41536000	23947000	7;6;4;3;2	7;6;4;3;2	7;6;4;3;2	sp|P62888|RL30_HUMAN 60S ribosomal protein L30 OS=Homo sapiens GN=RPL30 PE=1 SV=2;tr|E5RI99|E5RI99_HUMAN 60S ribosomal protein L30 (Fragment) OS=Homo sapiens GN=RPL30 PE=1 SV=1;tr|A0A0C4DH44|A0A0C4DH44_HUMAN 60S ribosomal protein L30 OS=Homo sapiens GN=RPL	5	7	7	7	4	5	6	4	6	5	6	6	4	5	6	4	6	5	6	6	4	5	6	4	6	5	6	6	50.4	50.4	50.4	12.784
sp|P30050|RL12_HUMAN	sp|P30050|RL12_HUMAN	0.980366	0.978748	1.94958	1.87947	48741000	55243000	34552000	40279000	47784000	54069000	67362000	75703000	7	7	7	sp|P30050|RL12_HUMAN 60S ribosomal protein L12 OS=Homo sapiens GN=RPL12 PE=1 SV=1	1	7	7	7	4	5	5	7	4	6	5	5	4	5	5	7	4	6	5	5	4	5	5	7	4	6	5	5	55.2	55.2	55.2	17.818
sp|P62753|RS6_HUMAN;tr|A2A3R7|A2A3R7_HUMAN;tr|A2A3R5|A2A3R5_HUMAN	sp|P62753|RS6_HUMAN;tr|A2A3R7|A2A3R7_HUMAN;tr|A2A3R5|A2A3R5_HUMAN	1852000	2191500	2161500	1.86468	1	1	1	1531200	1852000	2191500	2161500	2855200	3;2;2	3;2;2	3;2;2	sp|P62753|RS6_HUMAN 40S ribosomal protein S6 OS=Homo sapiens GN=RPS6 PE=1 SV=1;tr|A2A3R7|A2A3R7_HUMAN 40S ribosomal protein S6 OS=Homo sapiens GN=RPS6 PE=1 SV=1;tr|A2A3R5|A2A3R5_HUMAN 40S ribosomal protein S6 OS=Homo sapiens GN=RPS6 PE=1 SV=1	3	3	3	3	1	1	1	2	2	2	3	3	1	1	1	2	2	2	3	3	1	1	1	2	2	2	3	3	14.1	14.1	14.1	28.68
sp|Q16643|DREB_HUMAN;tr|D6R9W4|D6R9W4_HUMAN;tr|D6RFI1|D6RFI1_HUMAN;tr|D6R9Q9|D6R9Q9_HUMAN	sp|Q16643|DREB_HUMAN;tr|D6R9W4|D6R9W4_HUMAN	3.85554	3.03412	1.21733	1.85741	3277100	2312600	5973500	2797600	12635000	7016700	7271700	5196300	13;9;5;5	13;9;5;5	10;6;3;5	sp|Q16643|DREB_HUMAN Drebrin OS=Homo sapiens GN=DBN1 PE=1 SV=4;tr|D6R9W4|D6R9W4_HUMAN Drebrin (Fragment) OS=Homo sapiens GN=DBN1 PE=1 SV=1	4	13	13	10	3	2	4	3	9	6	9	9	3	2	4	3	9	6	9	9	3	2	4	2	7	3	7	6	24.5	24.5	20.8	71.428
tr|D6RAN4|D6RAN4_HUMAN;sp|P32969|RL9_HUMAN;tr|H0Y9V9|H0Y9V9_HUMAN;tr|H0Y9R4|H0Y9R4_HUMAN;tr|E7ESE0|E7ESE0_HUMAN	tr|D6RAN4|D6RAN4_HUMAN;sp|P32969|RL9_HUMAN;tr|H0Y9V9|H0Y9V9_HUMAN;tr|H0Y9R4|H0Y9R4_HUMAN;tr|E7ESE0|E7ESE0_HUMAN	1.18394	5155000	0.988168	1.85034	5077700	1	5476900	5845400	6011700	5155000	5412100	10816000	4;4;3;2;2	4;4;3;2;2	4;4;3;2;2	tr|D6RAN4|D6RAN4_HUMAN 60S ribosomal protein L9 (Fragment) OS=Homo sapiens GN=RPL9 PE=1 SV=5;sp|P32969|RL9_HUMAN 60S ribosomal protein L9 OS=Homo sapiens GN=RPL9 PE=1 SV=1;tr|H0Y9V9|H0Y9V9_HUMAN 60S ribosomal protein L9 (Fragment) OS=Homo sapiens GN=RPL9 P	5	4	4	4	2	1	2	2	3	2	4	4	2	1	2	2	3	2	4	4	2	1	2	2	3	2	4	4	24.2	24.2	24.2	20.874
tr|E9PKZ0|E9PKZ0_HUMAN;sp|P62917|RL8_HUMAN;tr|G3V1A1|G3V1A1_HUMAN;tr|E9PKU4|E9PKU4_HUMAN;tr|E9PP36|E9PP36_HUMAN	tr|E9PKZ0|E9PKZ0_HUMAN;sp|P62917|RL8_HUMAN;tr|G3V1A1|G3V1A1_HUMAN;tr|E9PKU4|E9PKU4_HUMAN	1.01854	1.39599	1.77836	1.84694	69680000	66451000	65639000	54788000	70972000	92765000	116730000	101190000	6;6;5;3;1	6;6;5;3;1	6;6;5;3;1	tr|E9PKZ0|E9PKZ0_HUMAN 60S ribosomal protein L8 (Fragment) OS=Homo sapiens GN=RPL8 PE=1 SV=1;sp|P62917|RL8_HUMAN 60S ribosomal protein L8 OS=Homo sapiens GN=RPL8 PE=1 SV=2;tr|G3V1A1|G3V1A1_HUMAN 60S ribosomal protein L8 OS=Homo sapiens GN=RPL8 PE=1 SV=1;tr	5	6	6	6	5	5	5	5	6	6	6	3	5	5	5	5	6	6	6	3	5	5	5	5	6	6	6	3	25.9	25.9	25.9	22.389
sp|P05388|RLA0_HUMAN;tr|F8VWS0|F8VWS0_HUMAN;tr|F8VW21|F8VW21_HUMAN;tr|F8VU65|F8VU65_HUMAN;tr|F8VPE8|F8VPE8_HUMAN;tr|G3V210|G3V210_HUMAN;tr|F8VQY6|F8VQY6_HUMAN;tr|F8VRK7|F8VRK7_HUMAN;sp|Q8NHW5|RLA0L_HUMAN;tr|F8VZS0|F8VZS0_HUMAN;tr|F8VWV4|F8VWV4_HUMAN;tr|F8VS58|F8VS58_HUMAN;tr|F8W1K8|F8W1K8_HUMAN	sp|P05388|RLA0_HUMAN;tr|F8VWS0|F8VWS0_HUMAN;tr|F8VW21|F8VW21_HUMAN;tr|F8VU65|F8VU65_HUMAN;tr|F8VPE8|F8VPE8_HUMAN;tr|G3V210|G3V210_HUMAN;tr|F8VQY6|F8VQY6_HUMAN;tr|F8VRK7|F8VRK7_HUMAN;sp|Q8NHW5|RLA0L_HUMAN;tr|F8VZS0|F8VZS0_HUMAN;tr|F8VWV4|F8VWV4_HUMAN;tr|F8VS58|F8VS58_HUMAN	1.48434	1.47192	2.33801	1.82253	32207000	29607000	30606000	32513000	47806000	43579000	71557000	59256000	13;12;11;11;10;10;9;9;8;8;7;7;2	13;12;11;11;10;10;9;9;8;8;7;7;2	13;12;11;11;10;10;9;9;8;8;7;7;2	sp|P05388|RLA0_HUMAN 60S acidic ribosomal protein P0 OS=Homo sapiens GN=RPLP0 PE=1 SV=1;tr|F8VWS0|F8VWS0_HUMAN 60S acidic ribosomal protein P0 OS=Homo sapiens GN=RPLP0 PE=1 SV=1;tr|F8VW21|F8VW21_HUMAN 60S acidic ribosomal protein P0 (Fragment) OS=Homo sapi	13	13	13	13	8	6	6	5	6	8	6	11	8	6	6	5	6	8	6	11	8	6	6	5	6	8	6	11	47.9	47.9	47.9	34.273
sp|O00541|PESC_HUMAN;tr|B5MCF9|B5MCF9_HUMAN;tr|B3KXD6|B3KXD6_HUMAN	sp|O00541|PESC_HUMAN;tr|B5MCF9|B5MCF9_HUMAN	1.72522	1.667	2.25778	1.82121	4101400	3613800	4245100	6155800	7075800	6024200	9584500	11211000	12;12;5	12;12;5	12;12;5	sp|O00541|PESC_HUMAN Pescadillo homolog OS=Homo sapiens GN=PES1 PE=1 SV=1;tr|B5MCF9|B5MCF9_HUMAN Pescadillo homolog OS=Homo sapiens GN=PES1 PE=1 SV=1	3	12	12	12	3	3	6	5	8	5	11	9	3	3	6	5	8	5	11	9	3	3	6	5	8	5	11	9	21.8	21.8	21.8	68.002
sp|Q9BQG0|MBB1A_HUMAN;tr|I3L1L3|I3L1L3_HUMAN;tr|I3L2H8|I3L2H8_HUMAN;tr|I3L311|I3L311_HUMAN	sp|Q9BQG0|MBB1A_HUMAN;tr|I3L1L3|I3L1L3_HUMAN	1.70042	1.57014	1.80785	1.82058	17074000	17315000	17554000	17640000	29033000	27187000	31735000	32115000	29;28;3;1	29;28;3;1	29;28;3;1	sp|Q9BQG0|MBB1A_HUMAN Myb-binding protein 1A OS=Homo sapiens GN=MYBBP1A PE=1 SV=2;tr|I3L1L3|I3L1L3_HUMAN Myb-binding protein 1A (Fragment) OS=Homo sapiens GN=MYBBP1A PE=1 SV=1	4	29	29	29	12	10	12	12	18	18	19	26	12	10	12	12	18	18	19	26	12	10	12	12	18	18	19	26	22.9	22.9	22.9	148.85
tr|E9PLL6|E9PLL6_HUMAN;sp|P46776|RL27A_HUMAN;tr|E9PJD9|E9PJD9_HUMAN;tr|E9PLX7|E9PLX7_HUMAN	tr|E9PLL6|E9PLL6_HUMAN;sp|P46776|RL27A_HUMAN;tr|E9PJD9|E9PJD9_HUMAN	2.02427	1.79754	2.97774	1.82043	3020000	2689900	2443900	3126300	6113300	4835200	7277300	5691200	4;4;2;1	4;4;2;1	4;4;2;1	tr|E9PLL6|E9PLL6_HUMAN 60S ribosomal protein L27a OS=Homo sapiens GN=RPL27A PE=1 SV=1;sp|P46776|RL27A_HUMAN 60S ribosomal protein L27a OS=Homo sapiens GN=RPL27A PE=1 SV=2;tr|E9PJD9|E9PJD9_HUMAN 60S ribosomal protein L27a OS=Homo sapiens GN=RPL27A PE=1 SV=1	4	4	4	4	3	2	3	2	3	4	4	3	3	2	3	2	3	4	4	3	3	2	3	2	3	4	4	3	31.5	31.5	31.5	12.201
sp|P40429|RL13A_HUMAN;tr|M0QYS1|M0QYS1_HUMAN;tr|Q8J015|Q8J015_HUMAN;sp|Q6NVV1|R13P3_HUMAN;tr|M0QZU1|M0QZU1_HUMAN;tr|A0A096LPE0|A0A096LPE0_HUMAN	sp|P40429|RL13A_HUMAN;tr|M0QYS1|M0QYS1_HUMAN;tr|Q8J015|Q8J015_HUMAN;sp|Q6NVV1|R13P3_HUMAN	1.17218	1.43412	2.22349	1.81207	46620000	41118000	33813000	33433000	54647000	58968000	75183000	60583000	10;9;8;5;2;2	10;9;8;5;2;2	10;9;8;5;2;2	sp|P40429|RL13A_HUMAN 60S ribosomal protein L13a OS=Homo sapiens GN=RPL13A PE=1 SV=2;tr|M0QYS1|M0QYS1_HUMAN 60S ribosomal protein L13a (Fragment) OS=Homo sapiens GN=RPL13A PE=1 SV=2;tr|Q8J015|Q8J015_HUMAN 60S ribosomal protein L13a OS=Homo sapiens GN=RPL13	6	10	10	10	7	5	5	5	6	8	7	6	7	5	5	5	6	8	7	6	7	5	5	5	6	8	7	6	37.9	37.9	37.9	23.577
sp|O15226|NKRF_HUMAN;tr|A0A087WXT2|A0A087WXT2_HUMAN	sp|O15226|NKRF_HUMAN	1.23515	1.1883	1.84841	1.79761	12647000	13266000	11307000	10312000	15621000	15764000	20900000	18537000	25;9	25;9	25;9	sp|O15226|NKRF_HUMAN NF-kappa-B-repressing factor OS=Homo sapiens GN=NKRF PE=1 SV=2	2	25	25	25	10	9	10	12	13	14	20	17	10	9	10	12	13	14	20	17	10	9	10	12	13	14	20	17	34.8	34.8	34.8	77.672
sp|Q9BQ67|GRWD1_HUMAN;tr|M0QX71|M0QX71_HUMAN	sp|Q9BQ67|GRWD1_HUMAN;tr|M0QX71|M0QX71_HUMAN	3200700	1871500	1.10896	1.74195	1	1	2480800	1698500	3200700	1871500	2751100	2958700	4;3	4;3	4;3	sp|Q9BQ67|GRWD1_HUMAN Glutamate-rich WD repeat-containing protein 1 OS=Homo sapiens GN=GRWD1 PE=1 SV=1;tr|M0QX71|M0QX71_HUMAN Glutamate-rich WD repeat-containing protein 1 (Fragment) OS=Homo sapiens GN=GRWD1 PE=1 SV=1	2	4	4	4	0	1	2	3	4	4	4	2	0	1	2	3	4	4	4	2	0	1	2	3	4	4	4	2	12.6	12.6	12.6	49.419
sp|P06748|NPM_HUMAN;tr|E5RGW4|E5RGW4_HUMAN;tr|E5RI98|E5RI98_HUMAN	sp|P06748|NPM_HUMAN	0.872744	19257000	2.57296	1.67963	15512000	1	7829900	13013000	13538000	19257000	20146000	21857000	7;1;1	7;1;1	7;1;1	sp|P06748|NPM_HUMAN Nucleophosmin OS=Homo sapiens GN=NPM1 PE=1 SV=2	3	7	7	7	3	1	2	3	4	4	6	7	3	1	2	3	4	4	6	7	3	1	2	3	4	4	6	7	31.6	31.6	31.6	32.575
sp|P18077|RL35A_HUMAN;tr|C9K025|C9K025_HUMAN;tr|F8WB72|F8WB72_HUMAN;tr|F8WBS5|F8WBS5_HUMAN	sp|P18077|RL35A_HUMAN;tr|C9K025|C9K025_HUMAN	1.28072	0.963547	2.52463	1.66621	14459000	16542000	9479400	9435800	18518000	15939000	23932000	15722000	7;5;3;3	7;5;3;3	7;5;3;3	sp|P18077|RL35A_HUMAN 60S ribosomal protein L35a OS=Homo sapiens GN=RPL35A PE=1 SV=2;tr|C9K025|C9K025_HUMAN 60S ribosomal protein L35a (Fragment) OS=Homo sapiens GN=RPL35A PE=1 SV=1	4	7	7	7	2	2	4	4	4	4	5	4	2	2	4	4	4	4	5	4	2	2	4	4	4	4	5	4	42.7	42.7	42.7	12.538
tr|J3KTA4|J3KTA4_HUMAN;sp|P17844|DDX5_HUMAN;tr|J3QSF1|J3QSF1_HUMAN;tr|J3KRZ1|J3KRZ1_HUMAN;tr|J3KRX8|J3KRX8_HUMAN;tr|J3QRQ7|J3QRQ7_HUMAN;tr|J3QR02|J3QR02_HUMAN;tr|X6RLV5|X6RLV5_HUMAN	tr|J3KTA4|J3KTA4_HUMAN;sp|P17844|DDX5_HUMAN	1.2614	1.39025	1.1635	1.66476	8683200	6120700	7988300	7500800	10953000	8509300	9294400	12487000	16;16;6;5;3;3;3;2	11;11;3;2;3;3;3;2	11;11;3;2;3;3;3;2	tr|J3KTA4|J3KTA4_HUMAN Probable ATP-dependent RNA helicase DDX5 OS=Homo sapiens GN=DDX5 PE=1 SV=1;sp|P17844|DDX5_HUMAN Probable ATP-dependent RNA helicase DDX5 OS=Homo sapiens GN=DDX5 PE=1 SV=1	8	16	11	11	8	8	12	9	12	12	11	9	5	5	9	6	9	8	9	5	5	5	9	6	9	8	9	5	26.7	18.2	18.2	69.086
sp|P38432|COIL_HUMAN	sp|P38432|COIL_HUMAN	3718100	3245500	1.46888	1.64831	1	1	3767700	3628800	3718100	3245500	5534300	5981400	9	9	9	sp|P38432|COIL_HUMAN Coilin OS=Homo sapiens GN=COIL PE=1 SV=1	1	9	9	9	1	1	2	4	6	4	7	6	1	1	2	4	6	4	7	6	1	1	2	4	6	4	7	6	17.4	17.4	17.4	62.608
sp|O60508|PRP17_HUMAN;tr|Q5SRN1|Q5SRN1_HUMAN	sp|O60508|PRP17_HUMAN;tr|Q5SRN1|Q5SRN1_HUMAN	1495900	1654400	1614500	1.63677	1	1	1	1288700	1495900	1654400	1614500	2109300	5;4	5;4	5;4	sp|O60508|PRP17_HUMAN Pre-mRNA-processing factor 17 OS=Homo sapiens GN=CDC40 PE=1 SV=1;tr|Q5SRN1|Q5SRN1_HUMAN Pre-mRNA-processing factor 17 OS=Homo sapiens GN=CDC40 PE=1 SV=1	2	5	5	5	0	0	1	2	4	3	4	3	0	0	1	2	4	3	4	3	0	0	1	2	4	3	4	3	11.9	11.9	11.9	65.521
sp|Q9NQ55|SSF1_HUMAN;tr|A0A0A6YYI3|A0A0A6YYI3_HUMAN;tr|A0A0B4J1V8|A0A0B4J1V8_HUMAN;tr|Q5FC07|Q5FC07_HUMAN;tr|H7C446|H7C446_HUMAN;tr|C9JHF7|C9JHF7_HUMAN;tr|C9J3W3|C9J3W3_HUMAN	sp|Q9NQ55|SSF1_HUMAN;tr|A0A0A6YYI3|A0A0A6YYI3_HUMAN;tr|A0A0B4J1V8|A0A0B4J1V8_HUMAN;tr|Q5FC07|Q5FC07_HUMAN	4154900	3654200	1.4153	1.63051	1	1	3142100	2409800	4154900	3654200	4447000	3929200	7;7;7;5;3;2;2	7;7;7;5;3;2;2	7;7;7;5;3;2;2	sp|Q9NQ55|SSF1_HUMAN Suppressor of SWI4 1 homolog OS=Homo sapiens GN=PPAN PE=1 SV=1;tr|A0A0A6YYI3|A0A0A6YYI3_HUMAN Protein PPAN-P2RY11 OS=Homo sapiens GN=PPAN-P2RY11 PE=1 SV=1;tr|A0A0B4J1V8|A0A0B4J1V8_HUMAN HCG2039996 OS=Homo sapiens GN=PPAN-P2RY11 PE=1 SV	7	7	7	7	0	0	2	4	4	5	6	5	0	0	2	4	4	5	6	5	0	0	2	4	4	5	6	5	16.9	16.9	16.9	53.193
sp|Q99879|H2B1M_HUMAN;sp|Q99877|H2B1N_HUMAN;sp|Q93079|H2B1H_HUMAN;sp|Q5QNW6|H2B2F_HUMAN;sp|P62807|H2B1C_HUMAN;sp|P58876|H2B1D_HUMAN;sp|P57053|H2BFS_HUMAN;sp|O60814|H2B1K_HUMAN;tr|U3KQK0|U3KQK0_HUMAN;sp|Q99880|H2B1L_HUMAN;sp|Q96A08|H2B1A_HUMAN	sp|Q99879|H2B1M_HUMAN;sp|Q99877|H2B1N_HUMAN;sp|Q93079|H2B1H_HUMAN;sp|Q5QNW6|H2B2F_HUMAN;sp|P62807|H2B1C_HUMAN;sp|P58876|H2B1D_HUMAN;sp|P57053|H2BFS_HUMAN;sp|O60814|H2B1K_HUMAN;tr|U3KQK0|U3KQK0_HUMAN;sp|Q99880|H2B1L_HUMAN	0.57664	0.81009	1.46975	1.61512	35112000	28424000	21967000	16366000	20247000	23026000	32286000	26433000	6;6;6;6;6;6;6;6;6;5;2	6;6;6;6;6;6;6;6;6;5;2	2;2;2;2;2;2;2;2;2;2;0	sp|Q99879|H2B1M_HUMAN Histone H2B type 1-M OS=Homo sapiens GN=HIST1H2BM PE=1 SV=3;sp|Q99877|H2B1N_HUMAN Histone H2B type 1-N OS=Homo sapiens GN=HIST1H2BN PE=1 SV=3;sp|Q93079|H2B1H_HUMAN Histone H2B type 1-H OS=Homo sapiens GN=HIST1H2BH PE=1 SV=3;sp|Q5QNW6|	11	6	6	2	4	5	4	5	3	3	5	5	4	5	4	5	3	3	5	5	2	2	2	2	1	1	2	2	41.3	41.3	7.9	13.989
sp|P25205|MCM3_HUMAN;tr|J3KQ69|J3KQ69_HUMAN;tr|Q7Z6P5|Q7Z6P5_HUMAN	sp|P25205|MCM3_HUMAN;tr|J3KQ69|J3KQ69_HUMAN	2400900	3799300	1.05713	1.60296	1	1	1528000	1498100	2400900	3799300	1615300	2401400	9;6;1	9;6;1	9;6;1	sp|P25205|MCM3_HUMAN DNA replication licensing factor MCM3 OS=Homo sapiens GN=MCM3 PE=1 SV=3;tr|J3KQ69|J3KQ69_HUMAN DNA replication licensing factor MCM3 OS=Homo sapiens GN=MCM3 PE=1 SV=2	3	9	9	9	1	1	2	2	7	4	5	5	1	1	2	2	7	4	5	5	1	1	2	2	7	4	5	5	13	13	13	90.98
sp|Q9BZE4|NOG1_HUMAN;tr|Q5T3R7|Q5T3R7_HUMAN	sp|Q9BZE4|NOG1_HUMAN	1.45076	1.31626	2.13953	1.58968	74926000	78024000	66940000	66724000	108700000	102700000	143220000	106070000	32;9	32;9	32;9	sp|Q9BZE4|NOG1_HUMAN Nucleolar GTP-binding protein 1 OS=Homo sapiens GN=GTPBP4 PE=1 SV=3	2	32	32	32	14	18	20	20	20	22	29	26	14	18	20	20	20	22	29	26	14	18	20	20	20	22	29	26	50.9	50.9	50.9	73.964
sp|P52756|RBM5_HUMAN;tr|C9JFQ5|C9JFQ5_HUMAN;tr|C9J9P7|C9J9P7_HUMAN;tr|F8WE23|F8WE23_HUMAN;tr|C9JR02|C9JR02_HUMAN;tr|F8W910|F8W910_HUMAN	sp|P52756|RBM5_HUMAN	4767100	5256400	5195600	1.58156	1	1	1	3581200	4767100	5256400	5195600	5663900	12;3;2;1;1;1	9;3;2;1;1;1	9;3;2;1;1;1	sp|P52756|RBM5_HUMAN RNA-binding protein 5 OS=Homo sapiens GN=RBM5 PE=1 SV=2	6	12	9	9	0	2	0	4	5	3	5	8	0	1	0	3	4	3	4	8	0	1	0	3	4	3	4	8	14.8	12.3	12.3	92.153
sp|Q99878|H2A1J_HUMAN;sp|Q96KK5|H2A1H_HUMAN;sp|Q9BTM1|H2AJ_HUMAN;sp|Q16777|H2A2C_HUMAN;sp|Q6FI13|H2A2A_HUMAN;sp|P20671|H2A1D_HUMAN;sp|P0C0S8|H2A1_HUMAN;tr|H0YFX9|H0YFX9_HUMAN;sp|Q93077|H2A1C_HUMAN;sp|Q7L7L0|H2A3_HUMAN;sp|P04908|H2A1B_HUMAN	sp|Q99878|H2A1J_HUMAN;sp|Q96KK5|H2A1H_HUMAN;sp|Q9BTM1|H2AJ_HUMAN;sp|Q16777|H2A2C_HUMAN;sp|Q6FI13|H2A2A_HUMAN;sp|P20671|H2A1D_HUMAN;sp|P0C0S8|H2A1_HUMAN;tr|H0YFX9|H0YFX9_HUMAN;sp|Q93077|H2A1C_HUMAN;sp|Q7L7L0|H2A3_HUMAN;sp|P04908|H2A1B_HUMAN	0.504096	1.04484	0.799438	1.58021	46513000	49644000	43448000	55994000	23447000	51870000	34734000	88482000	3;3;3;3;3;3;3;2;2;2;2	3;3;3;3;3;3;3;2;2;2;2	2;2;2;2;2;2;2;2;1;1;1	sp|Q99878|H2A1J_HUMAN Histone H2A type 1-J OS=Homo sapiens GN=HIST1H2AJ PE=1 SV=3;sp|Q96KK5|H2A1H_HUMAN Histone H2A type 1-H OS=Homo sapiens GN=HIST1H2AH PE=1 SV=3;sp|Q9BTM1|H2AJ_HUMAN Histone H2A.J OS=Homo sapiens GN=H2AFJ PE=1 SV=1;sp|Q16777|H2A2C_HUMAN	11	3	3	2	2	2	2	2	2	2	3	3	2	2	2	2	2	2	3	3	1	1	1	1	2	2	2	2	30.5	30.5	23.4	13.936
sp|Q07020|RL18_HUMAN;tr|J3QQ67|J3QQ67_HUMAN;tr|F8VYV2|F8VYV2_HUMAN;tr|G3V203|G3V203_HUMAN;tr|H0YHA7|H0YHA7_HUMAN;tr|A0A075B7A0|A0A075B7A0_HUMAN;tr|F8VUA6|F8VUA6_HUMAN;tr|F8VXR6|F8VXR6_HUMAN	sp|Q07020|RL18_HUMAN;tr|J3QQ67|J3QQ67_HUMAN;tr|F8VYV2|F8VYV2_HUMAN;tr|G3V203|G3V203_HUMAN;tr|H0YHA7|H0YHA7_HUMAN;tr|A0A075B7A0|A0A075B7A0_HUMAN;tr|F8VUA6|F8VUA6_HUMAN	1.33368	1.06576	0.931814	1.57206	66603000	65751000	60511000	50087000	88827000	70075000	56385000	78740000	8;8;7;7;7;6;4;1	8;8;7;7;7;6;4;1	8;8;7;7;7;6;4;1	sp|Q07020|RL18_HUMAN 60S ribosomal protein L18 OS=Homo sapiens GN=RPL18 PE=1 SV=2;tr|J3QQ67|J3QQ67_HUMAN 60S ribosomal protein L18 (Fragment) OS=Homo sapiens GN=RPL18 PE=1 SV=1;tr|F8VYV2|F8VYV2_HUMAN 60S ribosomal protein L18 OS=Homo sapiens GN=RPL18 PE=1	8	8	8	8	5	5	4	6	5	4	4	6	5	5	4	6	5	4	4	6	5	5	4	6	5	4	4	6	37.2	37.2	37.2	21.634
sp|Q08211|DHX9_HUMAN	sp|Q08211|DHX9_HUMAN	2.17759	1.52607	1.45317	1.55521	6246800	8436700	9472400	9140900	13603000	12875000	13765000	14216000	26	26	26	sp|Q08211|DHX9_HUMAN ATP-dependent RNA helicase A OS=Homo sapiens GN=DHX9 PE=1 SV=4	1	26	26	26	5	8	8	10	14	13	17	15	5	8	8	10	14	13	17	15	5	8	8	10	14	13	17	15	25.3	25.3	25.3	140.96
sp|P46777|RL5_HUMAN;tr|Q5T7N0|Q5T7N0_HUMAN	sp|P46777|RL5_HUMAN	1.11075	1.48827	1.71243	1.51986	37841000	33848000	42045000	36779000	42032000	50375000	71999000	55899000	15;4	15;4	15;4	sp|P46777|RL5_HUMAN 60S ribosomal protein L5 OS=Homo sapiens GN=RPL5 PE=1 SV=3	2	15	15	15	10	10	11	10	9	10	11	14	10	10	11	10	9	10	11	14	10	10	11	10	9	10	11	14	40.4	40.4	40.4	34.362
tr|G8JLB6|G8JLB6_HUMAN;sp|P31943|HNRH1_HUMAN;tr|E9PCY7|E9PCY7_HUMAN;tr|D6RBM0|D6RBM0_HUMAN;tr|D6RIU0|D6RIU0_HUMAN;tr|E7EN40|E7EN40_HUMAN;tr|E7EQJ0|E7EQJ0_HUMAN;tr|D6RAM1|D6RAM1_HUMAN;tr|E5RGV0|E5RGV0_HUMAN;tr|D6R9T0|D6R9T0_HUMAN;tr|D6RFM3|D6RFM3_HUMAN;tr|D6RIT2|D6RIT2_HUMAN;tr|D6RDU3|D6RDU3_HUMAN;tr|D6RJ04|D6RJ04_HUMAN;tr|D6RIH9|D6RIH9_HUMAN;tr|H0YB39|H0YB39_HUMAN;tr|H0YBD7|H0YBD7_HUMAN;tr|D6RDL0…	tr|G8JLB6|G8JLB6_HUMAN;sp|P31943|HNRH1_HUMAN;tr|E9PCY7|E9PCY7_HUMAN;tr|D6RBM0|D6RBM0_HUMAN;tr|D6RIU0|D6RIU0_HUMAN;tr|E7EN40|E7EN40_HUMAN;tr|E7EQJ0|E7EQJ0_HUMAN;tr|D6RAM1|D6RAM1_HUMAN;tr|E5RGV0|E5RGV0_HUMAN;tr|D6R9T0|D6R9T0_HUMAN;tr|D6RFM3|D6RFM3_HUMAN;tr|D6RIT2|D6RIT2_HUMAN;tr|D6RDU3|D6RDU3_HUMAN;tr|D6RJ04|D6RJ04_HUMAN;tr|D6RIH9|D6RIH9_HUMAN	1.31341	1.17098	1.19243	1.51126	44054000	38736000	44992000	39964000	57861000	45359000	53650000	60396000	15;15;15;11;9;9;8;8;8;8;8;8;8;8;8;7;6;6;4;4;3;3;2;2	15;15;15;11;9;9;8;8;8;8;8;8;8;8;8;7;6;6;4;4;3;3;2;2	8;8;8;7;7;6;7;7;4;7;7;7;7;7;7;1;1;6;1;4;3;1;1;2	tr|G8JLB6|G8JLB6_HUMAN Heterogeneous nuclear ribonucleoprotein H OS=Homo sapiens GN=HNRNPH1 PE=1 SV=1;sp|P31943|HNRH1_HUMAN Heterogeneous nuclear ribonucleoprotein H OS=Homo sapiens GN=HNRNPH1 PE=1 SV=4;tr|E9PCY7|E9PCY7_HUMAN Heterogeneous nuclear ribonucl	24	15	15	8	10	11	11	9	14	11	12	13	10	11	11	9	14	11	12	13	5	6	6	5	8	7	7	7	35.6	35.6	18.4	51.229
sp|P78316|NOP14_HUMAN;tr|E9PFK5|E9PFK5_HUMAN	sp|P78316|NOP14_HUMAN;tr|E9PFK5|E9PFK5_HUMAN	1702100	1644300	2183000	1.50611	1	1	1	1325600	1702100	1644300	2183000	1996500	6;5	6;5	6;5	sp|P78316|NOP14_HUMAN Nucleolar protein 14 OS=Homo sapiens GN=NOP14 PE=1 SV=3;tr|E9PFK5|E9PFK5_HUMAN Nucleolar protein 14 OS=Homo sapiens GN=NOP14 PE=1 SV=1	2	6	6	6	1	1	0	2	2	3	5	5	1	1	0	2	2	3	5	5	1	1	0	2	2	3	5	5	8.9	8.9	8.9	97.667
tr|M0R210|M0R210_HUMAN;sp|P62249|RS16_HUMAN;tr|A0A087WZ27|A0A087WZ27_HUMAN;tr|M0R3H0|M0R3H0_HUMAN;tr|M0QX76|M0QX76_HUMAN;tr|M0R1M5|M0R1M5_HUMAN;tr|Q6IPX4|Q6IPX4_HUMAN	tr|M0R210|M0R210_HUMAN;sp|P62249|RS16_HUMAN;tr|A0A087WZ27|A0A087WZ27_HUMAN;tr|M0R3H0|M0R3H0_HUMAN;tr|M0QX76|M0QX76_HUMAN;tr|M0R1M5|M0R1M5_HUMAN	1.43671	1.07299	1.76397	1.49058	2810100	3295000	2712800	2918000	4037300	3535500	4785300	4349500	6;6;5;4;3;3;2	6;6;5;4;3;3;2	6;6;5;4;3;3;2	tr|M0R210|M0R210_HUMAN 40S ribosomal protein S16 OS=Homo sapiens GN=RPS16 PE=1 SV=1;sp|P62249|RS16_HUMAN 40S ribosomal protein S16 OS=Homo sapiens GN=RPS16 PE=1 SV=2;tr|A0A087WZ27|A0A087WZ27_HUMAN Zinc finger protein 90 OS=Homo sapiens GN=ZNF90 PE=4 SV=2;t	7	6	6	6	2	2	4	5	4	4	4	4	2	2	4	5	4	4	4	4	2	2	4	5	4	4	4	4	40.3	40.3	40.3	14.419
sp|P60866|RS20_HUMAN;tr|E5RJX2|E5RJX2_HUMAN;tr|G3XAN0|G3XAN0_HUMAN;tr|E5RIP1|E5RIP1_HUMAN	sp|P60866|RS20_HUMAN;tr|E5RJX2|E5RJX2_HUMAN;tr|G3XAN0|G3XAN0_HUMAN;tr|E5RIP1|E5RIP1_HUMAN	1	1	1329300	1.48317	1	1	1	1262300	1	1	1329300	1872200	2;1;1;1	2;1;1;1	2;1;1;1	sp|P60866|RS20_HUMAN 40S ribosomal protein S20 OS=Homo sapiens GN=RPS20 PE=1 SV=1;tr|E5RJX2|E5RJX2_HUMAN 40S ribosomal protein S20 OS=Homo sapiens GN=RPS20 PE=1 SV=1;tr|G3XAN0|G3XAN0_HUMAN 40S ribosomal protein S20 OS=Homo sapiens GN=RPS20 PE=1 SV=1;tr|E5R	4	2	2	2	1	1	1	2	1	1	2	2	1	1	1	2	1	1	2	2	1	1	1	2	1	1	2	2	19.3	19.3	19.3	13.373
sp|P62269|RS18_HUMAN;tr|A0A0G2JQH2|A0A0G2JQH2_HUMAN;tr|Q5GGW2|Q5GGW2_HUMAN;tr|J3JS69|J3JS69_HUMAN	sp|P62269|RS18_HUMAN	3188600	3089900	2.16548	1.47791	1	1	2052200	2125300	3188600	3089900	4444000	3141000	9;3;3;3	9;3;3;3	9;3;3;3	sp|P62269|RS18_HUMAN 40S ribosomal protein S18 OS=Homo sapiens GN=RPS18 PE=1 SV=3	4	9	9	9	1	1	2	4	4	5	5	7	1	1	2	4	4	5	5	7	1	1	2	4	4	5	5	7	44.1	44.1	44.1	17.718
sp|P23396|RS3_HUMAN;tr|F2Z2S8|F2Z2S8_HUMAN;tr|H0YCJ7|H0YCJ7_HUMAN;tr|C9JNE2|C9JNE2_HUMAN;tr|E9PQ96|E9PQ96_HUMAN;tr|E9PJH4|E9PJH4_HUMAN;tr|E9PK82|E9PK82_HUMAN;tr|H0YF32|H0YF32_HUMAN;tr|E9PQX2|E9PQX2_HUMAN;tr|E9PSF4|E9PSF4_HUMAN	sp|P23396|RS3_HUMAN	0.946012	1.10853	4072600	1.47115	3154400	2571600	1	3426500	2984100	2850700	4072600	5040900	11;4;4;4;3;3;3;3;1;1	11;4;4;4;3;3;3;3;1;1	4;0;0;3;0;0;0;0;0;0	sp|P23396|RS3_HUMAN 40S ribosomal protein S3 OS=Homo sapiens GN=RPS3 PE=1 SV=2	10	11	11	4	2	2	1	5	5	4	7	10	2	2	1	5	5	4	7	10	1	1	0	1	1	1	1	4	17	17	8.9	137.8
tr|Q5QPL9|Q5QPL9_HUMAN;sp|Q9UKM9|RALY_HUMAN;tr|Q5QPM0|Q5QPM0_HUMAN;tr|Q5QPM1|Q5QPM1_HUMAN;tr|Q5QPM2|Q5QPM2_HUMAN	tr|Q5QPL9|Q5QPL9_HUMAN;sp|Q9UKM9|RALY_HUMAN;tr|Q5QPM0|Q5QPM0_HUMAN;tr|Q5QPM1|Q5QPM1_HUMAN;tr|Q5QPM2|Q5QPM2_HUMAN	4990600	1.28316	1.17328	1.40265	1	4344500	4986600	4167400	4990600	5574700	5850700	5845400	8;8;5;5;4	8;8;5;5;4	8;8;5;5;4	tr|Q5QPL9|Q5QPL9_HUMAN RNA-binding protein Raly (Fragment) OS=Homo sapiens GN=RALY PE=1 SV=1;sp|Q9UKM9|RALY_HUMAN RNA-binding protein Raly OS=Homo sapiens GN=RALY PE=1 SV=1;tr|Q5QPM0|Q5QPM0_HUMAN RNA-binding protein Raly (Fragment) OS=Homo sapiens GN=RALY	5	8	8	8	2	3	3	5	4	5	7	7	2	3	3	5	4	5	7	7	2	3	3	5	4	5	7	7	37.1	37.1	37.1	24.665
tr|J3KT73|J3KT73_HUMAN;tr|J3QL01|J3QL01_HUMAN;sp|P63173|RL38_HUMAN;tr|J3KSP2|J3KSP2_HUMAN	tr|J3KT73|J3KT73_HUMAN;tr|J3QL01|J3QL01_HUMAN;sp|P63173|RL38_HUMAN;tr|J3KSP2|J3KSP2_HUMAN	1	1	1173700	1.38815	1	1	1	892410	1	1	1173700	1238800	3;3;3;2	3;3;3;2	3;3;3;2	tr|J3KT73|J3KT73_HUMAN 60S ribosomal protein L38 OS=Homo sapiens GN=RPL38 PE=1 SV=1;tr|J3QL01|J3QL01_HUMAN 60S ribosomal protein L38 OS=Homo sapiens GN=RPL38 PE=1 SV=1;sp|P63173|RL38_HUMAN 60S ribosomal protein L38 OS=Homo sapiens GN=RPL38 PE=1 SV=2;tr|J3K	4	3	3	3	0	0	1	2	2	1	2	2	0	0	1	2	2	1	2	2	0	0	1	2	2	1	2	2	39.1	39.1	39.1	7.5649
sp|Q9BWF3|RBM4_HUMAN;tr|E9PB51|E9PB51_HUMAN;sp|Q9BQ04|RBM4B_HUMAN;tr|E9PLB0|E9PLB0_HUMAN;tr|E9PM61|E9PM61_HUMAN;tr|D6R9K7|D6R9K7_HUMAN;tr|U3KQD5|U3KQD5_HUMAN;tr|J3QRR5|J3QRR5_HUMAN	sp|Q9BWF3|RBM4_HUMAN;tr|E9PB51|E9PB51_HUMAN;sp|Q9BQ04|RBM4B_HUMAN	2881300	2233000	1.19028	1.37528	1	1	2136300	2051800	2881300	2233000	2542800	2821800	6;5;4;2;2;2;2;2	6;5;4;2;2;2;2;2	6;5;4;2;2;2;2;2	sp|Q9BWF3|RBM4_HUMAN RNA-binding protein 4 OS=Homo sapiens GN=RBM4 PE=1 SV=1;tr|E9PB51|E9PB51_HUMAN RNA-binding protein 4 (Fragment) OS=Homo sapiens GN=RBM4 PE=1 SV=1;sp|Q9BQ04|RBM4B_HUMAN RNA-binding protein 4B OS=Homo sapiens GN=RBM4B PE=1 SV=1	8	6	6	6	0	0	4	2	3	4	3	5	0	0	4	2	3	4	3	5	0	0	4	2	3	4	3	5	21.4	21.4	21.4	40.313
sp|Q9NPD3|EXOS4_HUMAN;tr|E9PI41|E9PI41_HUMAN;tr|E9PPI9|E9PPI9_HUMAN	sp|Q9NPD3|EXOS4_HUMAN;tr|E9PI41|E9PI41_HUMAN;tr|E9PPI9|E9PPI9_HUMAN	0.969746	1.12795	1.90064	1.37288	2089000	1804600	1794400	2083000	2025800	2035500	3410500	2859700	4;2;2	4;2;2	4;2;2	sp|Q9NPD3|EXOS4_HUMAN Exosome complex component RRP41 OS=Homo sapiens GN=EXOSC4 PE=1 SV=3;tr|E9PI41|E9PI41_HUMAN Exosome complex component RRP41 (Fragment) OS=Homo sapiens GN=EXOSC4 PE=1 SV=5;tr|E9PPI9|E9PPI9_HUMAN Exosome complex component RRP41 OS=Homo s	3	4	4	4	2	2	2	2	3	2	3	4	2	2	2	2	3	2	3	4	2	2	2	2	3	2	3	4	19.6	19.6	19.6	26.383
tr|A0A087X0X3|A0A087X0X3_HUMAN;sp|P52272|HNRPM_HUMAN;tr|M0R019|M0R019_HUMAN;tr|M0R2T0|M0R2T0_HUMAN;tr|M0R0N3|M0R0N3_HUMAN;tr|M0QYQ7|M0QYQ7_HUMAN;tr|M0R2I7|M0R2I7_HUMAN;tr|M0R0Y6|M0R0Y6_HUMAN;tr|M0QY96|M0QY96_HUMAN;tr|M0QYL3|M0QYL3_HUMAN	tr|A0A087X0X3|A0A087X0X3_HUMAN;sp|P52272|HNRPM_HUMAN;tr|M0R019|M0R019_HUMAN;tr|M0R2T0|M0R2T0_HUMAN	1.44177	1.19786	1.47378	1.36188	51989000	59800000	69210000	60558000	74956000	71632000	102000000	82473000	32;32;19;17;14;14;9;8;5;2	32;32;19;17;14;14;9;8;5;2	19;19;15;13;11;11;3;8;3;0	tr|A0A087X0X3|A0A087X0X3_HUMAN Heterogeneous nuclear ribonucleoprotein M OS=Homo sapiens GN=HNRNPM PE=1 SV=1;sp|P52272|HNRPM_HUMAN Heterogeneous nuclear ribonucleoprotein M OS=Homo sapiens GN=HNRNPM PE=1 SV=3;tr|M0R019|M0R019_HUMAN Heterogeneous nuclear ri	10	32	32	19	18	20	21	21	22	23	22	25	18	20	21	21	22	23	22	25	11	11	13	14	10	13	13	15	46.4	46.4	25.9	77.569
sp|Q9Y2P8|RCL1_HUMAN;tr|Q5VYW8|Q5VYW8_HUMAN;tr|Q5VZU3|Q5VZU3_HUMAN;tr|A0A087X1L9|A0A087X1L9_HUMAN;tr|Q5VZU2|Q5VZU2_HUMAN	sp|Q9Y2P8|RCL1_HUMAN	2164600	1910400	2774300	1.36182	1	1	1	1767200	2164600	1910400	2774300	2406600	6;2;2;2;1	6;2;2;2;1	6;2;2;2;1	sp|Q9Y2P8|RCL1_HUMAN RNA 3-terminal phosphate cyclase-like protein OS=Homo sapiens GN=RCL1 PE=1 SV=3	5	6	6	6	1	1	1	2	3	3	4	6	1	1	1	2	3	3	4	6	1	1	1	2	3	3	4	6	18.8	18.8	18.8	40.842
sp|Q12906|ILF3_HUMAN;tr|K7EKJ9|K7EKJ9_HUMAN;tr|K7EQR9|K7EQR9_HUMAN;sp|Q96SI9|STRBP_HUMAN;tr|K7ERM6|K7ERM6_HUMAN;tr|K7ENK6|K7ENK6_HUMAN;tr|K7EM82|K7EM82_HUMAN;tr|K7EJ09|K7EJ09_HUMAN;tr|K7ER69|K7ER69_HUMAN	sp|Q12906|ILF3_HUMAN	4513500	4191600	1.07425	1.36178	1	1	3256500	2802000	4513500	4191600	3498300	3815700	13;3;2;2;1;1;1;1;1	13;3;2;2;1;1;1;1;1	13;3;2;2;1;1;1;1;1	sp|Q12906|ILF3_HUMAN Interleukin enhancer-binding factor 3 OS=Homo sapiens GN=ILF3 PE=1 SV=3	9	13	13	13	1	1	5	4	5	8	9	7	1	1	5	4	5	8	9	7	1	1	5	4	5	8	9	7	14.9	14.9	14.9	95.337
sp|Q9NVI7|ATD3A_HUMAN;sp|Q5T2N8|ATD3C_HUMAN;tr|Q5SV16|Q5SV16_HUMAN	sp|Q9NVI7|ATD3A_HUMAN	3606000	3826800	1.77754	1.35693	1	1	2363100	2665500	3606000	3826800	4200500	3616900	10;4;4	10;4;4	1;0;0	sp|Q9NVI7|ATD3A_HUMAN ATPase family AAA domain-containing protein 3A OS=Homo sapiens GN=ATAD3A PE=1 SV=2	3	10	10	1	1	1	3	4	6	7	8	5	1	1	3	4	6	7	8	5	0	0	0	0	0	1	1	0	17.4	17.4	1.3	71.368
sp|O94906|PRP6_HUMAN	sp|O94906|PRP6_HUMAN	2.89234	6.53477	1.26278	1.34717	3224900	1082700	6375000	5781600	9327500	7075200	8050200	7788800	17	17	17	sp|O94906|PRP6_HUMAN Pre-mRNA-processing factor 6 OS=Homo sapiens GN=PRPF6 PE=1 SV=1	1	17	17	17	4	3	14	12	12	13	14	13	4	3	14	12	12	13	14	13	4	3	14	12	12	13	14	13	20	20	20	106.92
sp|O43143|DHX15_HUMAN;sp|O60231|DHX16_HUMAN;tr|F5H658|F5H658_HUMAN;sp|Q14562|DHX8_HUMAN	sp|O43143|DHX15_HUMAN	1.14299	1.21482	1.21268	1.34155	27709000	26911000	26890000	30359000	31671000	32692000	32609000	40728000	28;1;1;1	28;1;1;1	28;1;1;1	sp|O43143|DHX15_HUMAN Pre-mRNA-splicing factor ATP-dependent RNA helicase DHX15 OS=Homo sapiens GN=DHX15 PE=1 SV=2	4	28	28	28	18	17	24	20	21	21	23	22	18	17	24	20	21	21	23	22	18	17	24	20	21	21	23	22	32.7	32.7	32.7	90.932
sp|P19338|NUCL_HUMAN;tr|H7BY16|H7BY16_HUMAN	sp|P19338|NUCL_HUMAN;tr|H7BY16|H7BY16_HUMAN	4660000	3883800	1.53866	1.32837	1	1	2296800	3136400	4660000	3883800	3534000	4166300	8;5	8;5	8;5	sp|P19338|NUCL_HUMAN Nucleolin OS=Homo sapiens GN=NCL PE=1 SV=3;tr|H7BY16|H7BY16_HUMAN Nucleolin (Fragment) OS=Homo sapiens GN=NCL PE=1 SV=5	2	8	8	8	0	1	3	6	6	6	6	7	0	1	3	6	6	6	6	7	0	1	3	6	6	6	6	7	11.8	11.8	11.8	76.613
sp|P62851|RS25_HUMAN	sp|P62851|RS25_HUMAN	2782900	1.10585	1.53343	1.32465	1	1836600	2399200	2150000	2782900	2031000	3679000	2848000	4	4	4	sp|P62851|RS25_HUMAN 40S ribosomal protein S25 OS=Homo sapiens GN=RPS25 PE=1 SV=1	1	4	4	4	1	2	2	3	3	3	2	2	1	2	2	3	3	3	2	2	1	2	2	3	3	3	2	2	24	24	24	13.742
sp|P62805|H4_HUMAN	sp|P62805|H4_HUMAN	0.911741	0.94438	1.8714	1.31922	80026000	77868000	63765000	88454000	72963000	73537000	119330000	116690000	10	10	10	sp|P62805|H4_HUMAN Histone H4 OS=Homo sapiens GN=HIST1H4A PE=1 SV=2	1	10	10	10	6	7	7	7	7	7	9	8	6	7	7	7	7	7	9	8	6	7	7	7	7	7	9	8	53.4	53.4	53.4	11.367
sp|Q8NI27|THOC2_HUMAN;tr|H0Y815|H0Y815_HUMAN;tr|A0A0C4DG98|A0A0C4DG98_HUMAN;tr|F2Z2V2|F2Z2V2_HUMAN	sp|Q8NI27|THOC2_HUMAN;tr|H0Y815|H0Y815_HUMAN;tr|A0A0C4DG98|A0A0C4DG98_HUMAN	1	890490	541300	1.30933	1	1	1	870290	1	890490	541300	1139500	3;2;2;1	3;2;2;1	3;2;2;1	sp|Q8NI27|THOC2_HUMAN THO complex subunit 2 OS=Homo sapiens GN=THOC2 PE=1 SV=2;tr|H0Y815|H0Y815_HUMAN THO complex subunit 2 (Fragment) OS=Homo sapiens GN=THOC2 PE=1 SV=5;tr|A0A0C4DG98|A0A0C4DG98_HUMAN THO complex subunit 2 OS=Homo sapiens GN=THOC2 PE=1 SV=	4	3	3	3	0	1	0	2	2	2	2	2	0	1	0	2	2	2	2	2	0	1	0	2	2	2	2	2	2.1	2.1	2.1	182.77
sp|P08579|RU2B_HUMAN	sp|P08579|RU2B_HUMAN	0.852361	3428900	1.31064	1.29903	5010200	1	3441600	3552100	4270500	3428900	4510700	4614300	5	5	4	sp|P08579|RU2B_HUMAN U2 small nuclear ribonucleoprotein B OS=Homo sapiens GN=SNRPB2 PE=1 SV=1	1	5	5	4	2	1	3	2	2	3	5	3	2	1	3	2	2	3	5	3	1	0	2	1	1	2	4	2	25.8	25.8	22.2	25.486
sp|P46781|RS9_HUMAN;tr|B5MCT8|B5MCT8_HUMAN;tr|C9JM19|C9JM19_HUMAN;tr|F2Z3C0|F2Z3C0_HUMAN;tr|A8MXK4|A8MXK4_HUMAN	sp|P46781|RS9_HUMAN;tr|B5MCT8|B5MCT8_HUMAN;tr|C9JM19|C9JM19_HUMAN	0.751785	1.25226	2.01081	1.29623	8837500	6097300	4839000	5820800	6643900	7635400	9730300	7545100	8;6;6;2;2	8;6;6;2;2	8;6;6;2;2	sp|P46781|RS9_HUMAN 40S ribosomal protein S9 OS=Homo sapiens GN=RPS9 PE=1 SV=3;tr|B5MCT8|B5MCT8_HUMAN 40S ribosomal protein S9 OS=Homo sapiens GN=RPS9 PE=1 SV=1;tr|C9JM19|C9JM19_HUMAN 40S ribosomal protein S9 OS=Homo sapiens GN=RPS9 PE=1 SV=1	5	8	8	8	5	5	4	3	6	3	8	6	5	5	4	3	6	3	8	6	5	5	4	3	6	3	8	6	8.3	8.3	8.3	83.41
sp|Q13595|TRA2A_HUMAN	sp|Q13595|TRA2A_HUMAN	1.27983	1.22697	1.12266	1.28224	2975400	3197800	3582200	3219200	3808000	3923600	4021600	4127800	7	5	5	sp|Q13595|TRA2A_HUMAN Transformer-2 protein homolog alpha OS=Homo sapiens GN=TRA2A PE=1 SV=1	1	7	5	5	2	3	5	4	4	5	6	5	2	3	4	4	3	4	5	5	2	3	4	4	3	4	5	5	18.8	15.2	15.2	32.688
sp|P51532|SMCA4_HUMAN;tr|A0A0A0MT49|A0A0A0MT49_HUMAN;tr|Q9HBD4|Q9HBD4_HUMAN;sp|P51531|SMCA2_HUMAN;tr|K7EP28|K7EP28_HUMAN;tr|F6XE55|F6XE55_HUMAN;tr|A0A0A0MSS5|A0A0A0MSS5_HUMAN;tr|F6UH26|F6UH26_HUMAN;tr|B1ALG1|B1ALG1_HUMAN;tr|F6T8Q0|F6T8Q0_HUMAN;tr|B1ALG2|B1ALG2_HUMAN;tr|F6XG14|F6XG14_HUMAN;tr|B1ALF6|B1ALF6_HUMAN	sp|P51532|SMCA4_HUMAN;tr|A0A0A0MT49|A0A0A0MT49_HUMAN;tr|Q9HBD4|Q9HBD4_HUMAN	1808600	1	1407000	1.26849	1	1	1	1306200	1808600	1	1407000	1656900	6;6;6;2;1;1;1;1;1;1;1;1;1	6;6;6;2;1;1;1;1;1;1;1;1;1	6;6;6;2;1;1;1;1;1;1;1;1;1	sp|P51532|SMCA4_HUMAN Transcription activator BRG1 OS=Homo sapiens GN=SMARCA4 PE=1 SV=2;tr|A0A0A0MT49|A0A0A0MT49_HUMAN Transcription activator BRG1 OS=Homo sapiens GN=SMARCA4 PE=1 SV=1;tr|Q9HBD4|Q9HBD4_HUMAN SMARCA4 isoform 2 OS=Homo sapiens GN=SMARCA4 PE=	13	6	6	6	0	0	0	2	3	1	4	5	0	0	0	2	3	1	4	5	0	0	0	2	3	1	4	5	4.7	4.7	4.7	184.64
sp|Q15233|NONO_HUMAN;tr|H7C367|H7C367_HUMAN;tr|C9JYS8|C9JYS8_HUMAN;tr|C9IZL7|C9IZL7_HUMAN;tr|C9J4X2|C9J4X2_HUMAN	sp|Q15233|NONO_HUMAN;tr|H7C367|H7C367_HUMAN;tr|C9JYS8|C9JYS8_HUMAN	0.952068	1.26932	1.55185	1.26725	4212200	3521800	3163200	3405000	4010300	4470300	4908800	4315000	8;5;5;3;1	8;5;5;3;1	8;5;5;3;1	sp|Q15233|NONO_HUMAN Non-POU domain-containing octamer-binding protein OS=Homo sapiens GN=NONO PE=1 SV=4;tr|H7C367|H7C367_HUMAN Non-POU domain-containing octamer-binding protein (Fragment) OS=Homo sapiens GN=NONO PE=1 SV=5;tr|C9JYS8|C9JYS8_HUMAN Non-POU do	5	8	8	8	2	4	4	4	4	3	6	4	2	4	4	4	4	3	6	4	2	4	4	4	4	3	6	4	20.6	20.6	20.6	54.231
tr|G3V4W0|G3V4W0_HUMAN;tr|G3V4C1|G3V4C1_HUMAN;tr|B2R5W2|B2R5W2_HUMAN;tr|B4DY08|B4DY08_HUMAN;sp|P07910|HNRPC_HUMAN;tr|G3V576|G3V576_HUMAN;tr|G3V2Q1|G3V2Q1_HUMAN;tr|G3V555|G3V555_HUMAN;tr|G3V575|G3V575_HUMAN;tr|G3V251|G3V251_HUMAN;tr|G3V3K6|G3V3K6_HUMAN;tr|G3V5X6|G3V5X6_HUMAN;tr|B4DSU6|B4DSU6_HUMAN;tr|G3V2D6|G3V2D6_HUMAN;sp|P0DMR1|HNRC4_HUMAN;tr|A0A0G2JPF8|A0A0G2JPF8_HUMAN;tr|A0A0G2JNQ3|A0A0G2JNQ3_…	tr|G3V4W0|G3V4W0_HUMAN;tr|G3V4C1|G3V4C1_HUMAN;tr|B2R5W2|B2R5W2_HUMAN;tr|B4DY08|B4DY08_HUMAN;sp|P07910|HNRPC_HUMAN;tr|G3V576|G3V576_HUMAN;tr|G3V2Q1|G3V2Q1_HUMAN;tr|G3V555|G3V555_HUMAN;tr|G3V575|G3V575_HUMAN;tr|G3V251|G3V251_HUMAN;tr|G3V3K6|G3V3K6_HUMAN;tr|G3V5X6|G3V5X6_HUMAN;tr|B4DSU6|B4DSU6_HUMAN;tr|G3V2D6|G3V2D6_HUMAN;sp|P0DMR1|HNRC4_HUMAN;tr|A0A0G2JPF8|A0A0G2JPF8_HUMAN;tr|A0A0G2JNQ3|A0A0G2JNQ3_…	1.11578	1.10076	0.940713	1.26542	93083000	105500000	121950000	100030000	103860000	116130000	114720000	126580000	16;16;16;16;15;15;15;10;10;9;9;9;8;8;8;8;8;8;8;8;7;6;5;1;1;1	16;16;16;16;15;15;15;10;10;9;9;9;8;8;8;8;8;8;8;8;7;6;5;1;1;1	16;16;16;16;15;15;15;10;10;9;9;9;8;8;8;8;8;8;8;8;7;6;5;1;1;1	tr|G3V4W0|G3V4W0_HUMAN Heterogeneous nuclear ribonucleoproteins C1/C2 (Fragment) OS=Homo sapiens GN=HNRNPC PE=1 SV=1;tr|G3V4C1|G3V4C1_HUMAN Heterogeneous nuclear ribonucleoproteins C1/C2 OS=Homo sapiens GN=HNRNPC PE=1 SV=1;tr|B2R5W2|B2R5W2_HUMAN Heterogene	26	16	16	16	10	10	12	12	12	14	12	13	10	10	12	12	12	14	12	13	10	10	12	12	12	14	12	13	46.9	46.9	46.9	28.916
tr|Q5JRI1|Q5JRI1_HUMAN;sp|O75494|SRS10_HUMAN;sp|Q8WXF0|SRS12_HUMAN	tr|Q5JRI1|Q5JRI1_HUMAN;sp|O75494|SRS10_HUMAN;sp|Q8WXF0|SRS12_HUMAN	1.17774	2438100	1.48828	1.26151	2498000	1	2065600	2276800	2942000	2438100	3074200	2872200	4;4;3	4;4;3	4;4;3	tr|Q5JRI1|Q5JRI1_HUMAN Serine/arginine-rich-splicing factor 10 OS=Homo sapiens GN=SRSF10 PE=1 SV=1;sp|O75494|SRS10_HUMAN Serine/arginine-rich splicing factor 10 OS=Homo sapiens GN=SRSF10 PE=1 SV=1;sp|Q8WXF0|SRS12_HUMAN Serine/arginine-rich splicing factor	3	4	4	4	2	1	2	2	2	3	4	3	2	1	2	2	2	3	4	3	2	1	2	2	2	3	4	3	19.8	19.8	19.8	20.913
tr|Q5HY54|Q5HY54_HUMAN;sp|P21333|FLNA_HUMAN;tr|Q60FE5|Q60FE5_HUMAN;tr|A0A087WWY3|A0A087WWY3_HUMAN;tr|F8WE98|F8WE98_HUMAN;sp|O75369|FLNB_HUMAN;sp|Q14315|FLNC_HUMAN;tr|H0Y5F3|H0Y5F3_HUMAN;tr|H0Y5C6|H0Y5C6_HUMAN	tr|Q5HY54|Q5HY54_HUMAN;sp|P21333|FLNA_HUMAN;tr|Q60FE5|Q60FE5_HUMAN;tr|A0A087WWY3|A0A087WWY3_HUMAN	12080000	1.84045	1.81771	1.25866	1	4032700	2961700	4559200	12080000	7422000	5383500	5738500	32;32;32;31;9;3;3;2;2	32;32;32;31;9;3;3;2;2	32;32;32;31;9;3;3;2;2	tr|Q5HY54|Q5HY54_HUMAN Filamin-A OS=Homo sapiens GN=FLNA PE=1 SV=1;sp|P21333|FLNA_HUMAN Filamin-A OS=Homo sapiens GN=FLNA PE=1 SV=4;tr|Q60FE5|Q60FE5_HUMAN Filamin A OS=Homo sapiens GN=FLNA PE=1 SV=1;tr|A0A087WWY3|A0A087WWY3_HUMAN Filamin-A OS=Homo sapiens	9	32	32	32	0	4	5	7	26	14	16	15	0	4	5	7	26	14	16	15	0	4	5	7	26	14	16	15	18.3	18.3	18.3	276.55
sp|P19105|ML12A_HUMAN;sp|O14950|ML12B_HUMAN;tr|J3QRS3|J3QRS3_HUMAN;tr|J3KTJ1|J3KTJ1_HUMAN;sp|P24844|MYL9_HUMAN	sp|P19105|ML12A_HUMAN;sp|O14950|ML12B_HUMAN;tr|J3QRS3|J3QRS3_HUMAN	0.983649	1420400	1351200	1.25662	1688000	1	1	1445300	1660400	1420400	1351200	1816200	3;3;3;1;1	3;3;3;1;1	3;3;3;1;1	sp|P19105|ML12A_HUMAN Myosin regulatory light chain 12A OS=Homo sapiens GN=MYL12A PE=1 SV=2;sp|O14950|ML12B_HUMAN Myosin regulatory light chain 12B OS=Homo sapiens GN=MYL12B PE=1 SV=2;tr|J3QRS3|J3QRS3_HUMAN Myosin regulatory light chain 12A OS=Homo sapiens	5	3	3	3	2	0	1	3	3	2	2	3	2	0	1	3	3	2	2	3	2	0	1	3	3	2	2	3	18.7	18.7	18.7	19.794
tr|J3KPF5|J3KPF5_HUMAN;tr|G3V132|G3V132_HUMAN;sp|P47756|CAPZB_HUMAN;tr|B1AK85|B1AK85_HUMAN	tr|J3KPF5|J3KPF5_HUMAN;tr|G3V132|G3V132_HUMAN;sp|P47756|CAPZB_HUMAN;tr|B1AK85|B1AK85_HUMAN	5273500	3889200	0.976624	1.25571	1	1	3456600	3062900	5273500	3889200	3375800	3846100	5;5;4;3	5;5;4;3	5;5;4;3	tr|J3KPF5|J3KPF5_HUMAN Prostamide/prostaglandin F synthase OS=Homo sapiens GN=FAM213B PE=1 SV=1;tr|G3V132|G3V132_HUMAN Interactor protein for cytohesin exchange factors 1 OS=Homo sapiens GN=IPCEF1 PE=4 SV=1;sp|P47756|CAPZB_HUMAN F-actin-capping protein sub	4	5	5	5	1	1	3	2	5	3	4	5	1	1	3	2	5	3	4	5	1	1	3	2	5	3	4	5	8.9	8.9	8.9	75.426
sp|P62318|SMD3_HUMAN	sp|P62318|SMD3_HUMAN	1.24755	1.04097	1.21766e-07	1.24801	7762200	7427300	8212500	12177000	9683700	7731600	1	15197000	2	2	2	sp|P62318|SMD3_HUMAN Small nuclear ribonucleoprotein Sm D3 OS=Homo sapiens GN=SNRPD3 PE=1 SV=1	1	2	2	2	2	2	2	2	2	2	1	2	2	2	2	2	2	2	1	2	2	2	2	2	2	2	1	2	15.1	15.1	15.1	13.916
sp|P52597|HNRPF_HUMAN	sp|P52597|HNRPF_HUMAN	1.57254	1.13856	1.56993	1.23014	8626800	10162000	8610600	9748500	13566000	11570000	13518000	11992000	10	8	8	sp|P52597|HNRPF_HUMAN Heterogeneous nuclear ribonucleoprotein F OS=Homo sapiens GN=HNRNPF PE=1 SV=3	1	10	8	8	7	7	6	7	9	7	10	9	5	5	4	5	7	6	8	7	5	5	4	5	7	6	8	7	32.5	26	26	45.671
tr|A0A0B4J1Z1|A0A0B4J1Z1_HUMAN;tr|C9JAB2|C9JAB2_HUMAN;sp|Q16629|SRSF7_HUMAN;tr|F8WEA1|F8WEA1_HUMAN	tr|A0A0B4J1Z1|A0A0B4J1Z1_HUMAN;tr|C9JAB2|C9JAB2_HUMAN;sp|Q16629|SRSF7_HUMAN	1.47737	1.43151	1.14127	1.2284	7236500	6105600	7361000	8482600	10691000	8740200	8400900	10420000	8;8;8;2	8;8;8;2	7;7;7;2	tr|A0A0B4J1Z1|A0A0B4J1Z1_HUMAN Serine/arginine-rich-splicing factor 7 OS=Homo sapiens GN=SRSF7 PE=1 SV=1;tr|C9JAB2|C9JAB2_HUMAN Serine/arginine-rich-splicing factor 7 OS=Homo sapiens GN=SRSF7 PE=1 SV=1;sp|Q16629|SRSF7_HUMAN Serine/arginine-rich splicing fa	4	8	8	7	4	4	6	4	6	5	6	5	4	4	6	4	6	5	6	5	3	3	5	3	5	4	5	5	51.1	51.1	51.1	15.763
sp|Q13547|HDAC1_HUMAN;tr|Q5TEE2|Q5TEE2_HUMAN	sp|Q13547|HDAC1_HUMAN;tr|Q5TEE2|Q5TEE2_HUMAN	1.22471	0.796801	1.22507	1.22566	4409700	5533500	4764400	4132700	5400600	4409100	5836700	5065300	9;7	9;7	5;3	sp|Q13547|HDAC1_HUMAN Histone deacetylase 1 OS=Homo sapiens GN=HDAC1 PE=1 SV=1;tr|Q5TEE2|Q5TEE2_HUMAN Histone deacetylase 1 (Fragment) OS=Homo sapiens GN=HDAC1 PE=1 SV=1	2	9	9	5	2	2	5	2	6	6	5	6	2	2	5	2	6	6	5	6	0	0	2	0	4	3	3	3	24.1	24.1	14.7	55.102
sp|Q13185|CBX3_HUMAN;tr|C9JMM0|C9JMM0_HUMAN;tr|S4R2Y4|S4R2Y4_HUMAN;tr|G3V481|G3V481_HUMAN;tr|K7ELA4|K7ELA4_HUMAN;tr|B5MD17|B5MD17_HUMAN;tr|J3KS05|J3KS05_HUMAN;sp|P83916|CBX1_HUMAN	sp|Q13185|CBX3_HUMAN;tr|C9JMM0|C9JMM0_HUMAN;tr|S4R2Y4|S4R2Y4_HUMAN;tr|G3V481|G3V481_HUMAN	2152700	1961600	1792700	1.21112	1	1	1	2041000	2152700	1961600	1792700	2471900	4;2;2;2;1;1;1;1	4;2;2;2;1;1;1;1	4;2;2;2;1;1;1;1	sp|Q13185|CBX3_HUMAN Chromobox protein homolog 3 OS=Homo sapiens GN=CBX3 PE=1 SV=4;tr|C9JMM0|C9JMM0_HUMAN Chromobox protein homolog 3 (Fragment) OS=Homo sapiens GN=CBX3 PE=1 SV=1;tr|S4R2Y4|S4R2Y4_HUMAN Chromobox protein homolog 3 (Fragment) OS=Homo sapiens	8	4	4	4	1	1	1	2	2	2	4	3	1	1	1	2	2	2	4	3	1	1	1	2	2	2	4	3	23.5	23.5	23.5	20.811
sp|Q9BQA1|MEP50_HUMAN;tr|H0Y711|H0Y711_HUMAN	sp|Q9BQA1|MEP50_HUMAN;tr|H0Y711|H0Y711_HUMAN	0.939377	0.748193	0.929976	1.21031	83566000	102090000	90326000	84507000	78500000	76383000	84001000	102280000	8;4	8;4	8;4	sp|Q9BQA1|MEP50_HUMAN Methylosome protein 50 OS=Homo sapiens GN=WDR77 PE=1 SV=1;tr|H0Y711|H0Y711_HUMAN Methylosome protein 50 (Fragment) OS=Homo sapiens GN=WDR77 PE=1 SV=1	2	8	8	8	4	5	5	7	7	5	6	6	4	5	5	7	7	5	6	6	4	5	5	7	7	5	6	6	28.9	28.9	28.9	36.724
sp|Q9BYX7|ACTBM_HUMAN;tr|M0QYC8|M0QYC8_HUMAN;tr|H0Y3X1|H0Y3X1_HUMAN;tr|J3QKU0|J3QKU0_HUMAN;tr|J3KQD8|J3KQD8_HUMAN;tr|E7EVI1|E7EVI1_HUMAN;tr|J3QRD3|J3QRD3_HUMAN;tr|F2Z2V1|F2Z2V1_HUMAN;tr|F8VVU7|F8VVU7_HUMAN;sp|Q6S8J3|POTEE_HUMAN;sp|A5A3E0|POTEF_HUMAN;sp|P0CG38|POTEI_HUMAN;sp|P0CG39|POTEJ_HUMAN	sp|Q9BYX7|ACTBM_HUMAN;tr|M0QYC8|M0QYC8_HUMAN;tr|H0Y3X1|H0Y3X1_HUMAN	1.95037	1.31789	1.3333	1.20974	288330000	375410000	305730000	301660000	562350000	494750000	407630000	364930000	19;11;11;8;8;8;8;8;8;7;7;6;4	12;5;5;2;2;2;5;2;2;4;4;3;3	7;3;3;1;1;1;3;1;1;2;2;2;2	sp|Q9BYX7|ACTBM_HUMAN Putative beta-actin-like protein 3 OS=Homo sapiens GN=POTEKP PE=5 SV=1;tr|M0QYC8|M0QYC8_HUMAN Complement C3 (Fragment) OS=Homo sapiens GN=C3 PE=1 SV=1;tr|H0Y3X1|H0Y3X1_HUMAN Hemicentin-2 (Fragment) OS=Homo sapiens GN=HMCN2 PE=1 SV=2	13	19	12	7	15	14	17	15	19	17	18	17	9	9	10	9	12	10	11	11	5	5	5	4	7	5	6	6	32	22.7	11.7	185.27
sp|Q92841|DDX17_HUMAN;tr|H3BLZ8|H3BLZ8_HUMAN	sp|Q92841|DDX17_HUMAN;tr|H3BLZ8|H3BLZ8_HUMAN	1.29682	1.18138	1.01593	1.20456	19810000	19440000	23979000	21915000	25690000	22966000	24361000	26398000	21;21	21;21	16;16	sp|Q92841|DDX17_HUMAN Probable ATP-dependent RNA helicase DDX17 OS=Homo sapiens GN=DDX17 PE=1 SV=2;tr|H3BLZ8|H3BLZ8_HUMAN Probable ATP-dependent RNA helicase DDX17 OS=Homo sapiens GN=DDX17 PE=1 SV=1	2	21	21	16	13	11	14	12	13	15	12	16	13	11	14	12	13	15	12	16	10	8	11	9	10	11	10	12	30.6	30.6	23.5	80.272
sp|P78332|RBM6_HUMAN;tr|E9PGM9|E9PGM9_HUMAN;tr|F8WCA5|F8WCA5_HUMAN;tr|C9J250|C9J250_HUMAN;tr|F8WF63|F8WF63_HUMAN;tr|C9JSL1|C9JSL1_HUMAN	sp|P78332|RBM6_HUMAN;tr|E9PGM9|E9PGM9_HUMAN;tr|F8WCA5|F8WCA5_HUMAN	1.37334	1.21476	1.26929	1.19107	5953800	5133700	5225900	4832200	8176600	6236200	6633200	5755500	22;18;13;2;2;1	21;17;13;2;2;1	20;16;13;2;2;1	sp|P78332|RBM6_HUMAN RNA-binding protein 6 OS=Homo sapiens GN=RBM6 PE=1 SV=5;tr|E9PGM9|E9PGM9_HUMAN RNA-binding protein 6 OS=Homo sapiens GN=RBM6 PE=1 SV=1;tr|F8WCA5|F8WCA5_HUMAN RNA-binding protein 6 OS=Homo sapiens GN=RBM6 PE=1 SV=1	6	22	21	20	5	5	7	9	13	12	15	14	4	4	6	9	12	11	14	13	4	4	6	9	12	11	13	13	20.1	19.5	18.7	128.64
sp|P35580|MYH10_HUMAN;tr|E7ERA5|E7ERA5_HUMAN	sp|P35580|MYH10_HUMAN	4.30781	2.49125	1.24032	1.18848	5592400	7316800	11747000	10935000	24091000	18228000	14570000	12996000	45;4	45;4	36;4	sp|P35580|MYH10_HUMAN Myosin-10 OS=Homo sapiens GN=MYH10 PE=1 SV=3	2	45	45	36	6	7	16	16	32	21	24	22	6	7	16	16	32	21	24	22	3	4	10	11	26	15	19	16	28.2	28.2	23.6	229
tr|Q49AN9|Q49AN9_HUMAN;tr|F5H013|F5H013_HUMAN;sp|P62308|RUXG_HUMAN;sp|A8MWD9|RUXGL_HUMAN	tr|Q49AN9|Q49AN9_HUMAN;tr|F5H013|F5H013_HUMAN;sp|P62308|RUXG_HUMAN;sp|A8MWD9|RUXGL_HUMAN	1080900	1546400	0.971178	1.18649	1	1	1731300	961240	1080900	1546400	1681400	1140500	2;2;2;2	2;2;2;2	2;2;2;2	tr|Q49AN9|Q49AN9_HUMAN SNRPG protein OS=Homo sapiens GN=SNRPG PE=1 SV=1;tr|F5H013|F5H013_HUMAN Small nuclear ribonucleoprotein G OS=Homo sapiens GN=SNRPG PE=1 SV=1;sp|P62308|RUXG_HUMAN Small nuclear ribonucleoprotein G OS=Homo sapiens GN=SNRPG PE=1 SV=1;sp	4	2	2	2	1	1	2	2	2	2	2	2	1	1	2	2	2	2	2	2	1	1	2	2	2	2	2	2	20.3	20.3	20.3	7.1013
sp|Q9Y230|RUVB2_HUMAN;tr|M0R0Y3|M0R0Y3_HUMAN;tr|X6R2L4|X6R2L4_HUMAN;tr|M0QXI6|M0QXI6_HUMAN;tr|M0R0Z0|M0R0Z0_HUMAN	sp|Q9Y230|RUVB2_HUMAN;tr|M0R0Y3|M0R0Y3_HUMAN	1.34287	1.05524	1.12373	1.18498	5052300	4688300	6053300	5349200	6784600	4947300	6802300	6338700	13;10;5;2;1	13;10;5;2;1	13;10;5;2;1	sp|Q9Y230|RUVB2_HUMAN RuvB-like 2 OS=Homo sapiens GN=RUVBL2 PE=1 SV=3;tr|M0R0Y3|M0R0Y3_HUMAN RuvB-like 2 OS=Homo sapiens GN=RUVBL2 PE=1 SV=1	5	13	13	13	3	3	8	8	12	10	10	9	3	3	8	8	12	10	10	9	3	3	8	8	12	10	10	9	35.4	35.4	35.4	51.156
sp|Q8IWL1|SFPA2_HUMAN;tr|H0YM97|H0YM97_HUMAN	sp|Q8IWL1|SFPA2_HUMAN	1.31805	0.977592	1.17663	1.18282	10014000	11246000	10106000	10546000	13199000	10994000	11891000	12474000	10;2	10;2	10;2	sp|Q8IWL1|SFPA2_HUMAN Pulmonary surfactant-associated protein A2 OS=Homo sapiens GN=SFTPA2 PE=1 SV=1	2	10	10	10	5	5	7	7	7	8	9	9	5	5	7	7	7	8	9	9	5	5	7	7	7	8	9	9	3.7	3.7	3.7	391.86
sp|Q9BYE7|PCGF6_HUMAN	sp|Q9BYE7|PCGF6_HUMAN	948520	1	1145400	1.18227	1	1	1	1712800	948520	1	1145400	2025000	4	4	4	sp|Q9BYE7|PCGF6_HUMAN Polycomb group RING finger protein 6 OS=Homo sapiens GN=PCGF6 PE=1 SV=2	1	4	4	4	0	0	0	3	3	1	4	3	0	0	0	3	3	1	4	3	0	0	0	3	3	1	4	3	12.6	12.6	12.6	39.047
sp|Q9UHA3|RLP24_HUMAN;tr|H3BMQ2|H3BMQ2_HUMAN	sp|Q9UHA3|RLP24_HUMAN;tr|H3BMQ2|H3BMQ2_HUMAN	0.941523	1.62546	2.40252	1.17096	4767700	3855900	3969200	6664000	4488900	6267600	9536100	7803300	3;2	3;2	3;2	sp|Q9UHA3|RLP24_HUMAN Probable ribosome biogenesis protein RLP24 OS=Homo sapiens GN=RSL24D1 PE=1 SV=1;tr|H3BMQ2|H3BMQ2_HUMAN Probable ribosome biogenesis protein RLP24 (Fragment) OS=Homo sapiens GN=RSL24D1 PE=1 SV=1	2	3	3	3	2	2	2	2	2	2	3	2	2	2	2	2	2	2	3	2	2	2	2	2	2	2	3	2	0.1	0.1	0.1	1548
sp|Q9H307|PININ_HUMAN;tr|G3V5F0|G3V5F0_HUMAN;tr|G3V579|G3V579_HUMAN	sp|Q9H307|PININ_HUMAN	1987800	2025400	2101400	1.16777	1	1	1	1679100	1987800	2025400	2101400	1960800	5;2;2	5;2;2	5;2;2	sp|Q9H307|PININ_HUMAN Pinin OS=Homo sapiens GN=PNN PE=1 SV=4	3	5	5	5	0	0	1	3	3	2	2	5	0	0	1	3	3	2	2	5	0	0	1	3	3	2	2	5	7.7	7.7	7.7	81.613
sp|P0DMV9|HS71B_HUMAN;sp|P0DMV8|HS71A_HUMAN;tr|A0A0G2JIW1|A0A0G2JIW1_HUMAN;tr|V9GZ37|V9GZ37_HUMAN	sp|P0DMV9|HS71B_HUMAN;sp|P0DMV8|HS71A_HUMAN;tr|A0A0G2JIW1|A0A0G2JIW1_HUMAN;tr|V9GZ37|V9GZ37_HUMAN	1.36391	1.26235	1.02311	1.16361	26548000	25275000	25656000	25103000	36209000	31906000	26249000	29210000	22;22;22;13	22;22;22;13	11;11;11;6	sp|P0DMV9|HS71B_HUMAN Heat shock 70 kDa protein 1B OS=Homo sapiens GN=HSPA1B PE=1 SV=1;sp|P0DMV8|HS71A_HUMAN Heat shock 70 kDa protein 1A OS=Homo sapiens GN=HSPA1A PE=1 SV=1;tr|A0A0G2JIW1|A0A0G2JIW1_HUMAN Heat shock 70 kDa protein 1B OS=Homo sapiens GN=HSP	4	22	22	11	12	10	11	13	12	15	13	15	12	10	11	13	12	15	13	15	5	3	5	7	6	7	5	7	40.9	40.9	19.5	70.051
sp|Q13247|SRSF6_HUMAN;tr|A0A0D9SEM4|A0A0D9SEM4_HUMAN;sp|Q08170|SRSF4_HUMAN	sp|Q13247|SRSF6_HUMAN;tr|A0A0D9SEM4|A0A0D9SEM4_HUMAN;sp|Q08170|SRSF4_HUMAN	1.29644	3654900	1.13775	1.16142	2867400	1	2740500	2634200	3717400	3654900	3118000	3059400	5;3;3	5;3;3	4;2;2	sp|Q13247|SRSF6_HUMAN Serine/arginine-rich splicing factor 6 OS=Homo sapiens GN=SRSF6 PE=1 SV=2;tr|A0A0D9SEM4|A0A0D9SEM4_HUMAN Serine/arginine-rich-splicing factor 4 (Fragment) OS=Homo sapiens GN=SRSF4 PE=1 SV=1;sp|Q08170|SRSF4_HUMAN Serine/arginine-rich s	3	5	5	4	2	1	2	2	3	5	5	3	2	1	2	2	3	5	5	3	1	0	1	1	3	4	4	2	16	16	13.4	39.586
tr|A0A0D9SG12|A0A0D9SG12_HUMAN;tr|A0A0D9SFB3|A0A0D9SFB3_HUMAN;sp|O00571|DDX3X_HUMAN;tr|A0A0D9SF53|A0A0D9SF53_HUMAN;sp|O15523|DDX3Y_HUMAN;sp|O95232|LC7L3_HUMAN;tr|D6RDI2|D6RDI2_HUMAN;tr|C9J8G5|C9J8G5_HUMAN;tr|C9J081|C9J081_HUMAN;tr|D6RHH0|D6RHH0_HUMAN;tr|U3KQT3|U3KQT3_HUMAN;tr|A0A087WVZ1|A0A087WVZ1_HUMAN;tr|B4DLA0|B4DLA0_HUMAN;tr|D6RCM4|D6RCM4_HUMAN;sp|Q9NQI0|DDX4_HUMAN	tr|A0A0D9SG12|A0A0D9SG12_HUMAN;tr|A0A0D9SFB3|A0A0D9SFB3_HUMAN;sp|O00571|DDX3X_HUMAN;tr|A0A0D9SF53|A0A0D9SF53_HUMAN;sp|O15523|DDX3Y_HUMAN	0.999613	1.06982	0.941305	1.15208	7241000	6495400	6751900	7346100	7238200	6948900	6355600	8463300	18;14;14;14;10;4;2;2;2;1;1;1;1;1;1	17;13;13;13;9;4;2;2;2;1;1;1;1;1;1	17;13;13;13;9;4;2;2;2;1;1;1;1;1;1	tr|A0A0D9SG12|A0A0D9SG12_HUMAN ATP-dependent RNA helicase DDX3X OS=Homo sapiens GN=DDX3X PE=1 SV=1;tr|A0A0D9SFB3|A0A0D9SFB3_HUMAN ATP-dependent RNA helicase DDX3X OS=Homo sapiens GN=DDX3X PE=1 SV=1;sp|O00571|DDX3X_HUMAN ATP-dependent RNA helicase DDX3X OS=	15	18	17	17	7	9	10	8	12	12	13	12	6	8	9	7	11	11	12	11	6	8	9	7	11	11	12	11	13.7	12.9	12.9	171.89
tr|B4DY09|B4DY09_HUMAN;sp|Q12905|ILF2_HUMAN;tr|X6R6Z1|X6R6Z1_HUMAN;tr|A0A0A0MRL0|A0A0A0MRL0_HUMAN	tr|B4DY09|B4DY09_HUMAN;sp|Q12905|ILF2_HUMAN;tr|X6R6Z1|X6R6Z1_HUMAN	0.817873	0.943559	1.35603	1.14582	5176600	3940400	2659300	3708000	4233800	3718000	3606100	4248700	5;5;3;2	5;5;3;2	5;5;3;2	tr|B4DY09|B4DY09_HUMAN Interleukin enhancer-binding factor 2 OS=Homo sapiens GN=ILF2 PE=1 SV=1;sp|Q12905|ILF2_HUMAN Interleukin enhancer-binding factor 2 OS=Homo sapiens GN=ILF2 PE=1 SV=2;tr|X6R6Z1|X6R6Z1_HUMAN Interleukin enhancer-binding factor 2 (Fragme	4	5	5	5	2	2	4	2	5	4	5	5	2	2	4	2	5	4	5	5	2	2	4	2	5	4	5	5	20.2	20.2	20.2	38.91
sp|Q13838|DX39B_HUMAN;tr|Q5STU3|Q5STU3_HUMAN;tr|F6WLT2|F6WLT2_HUMAN;tr|A0A0G2JJZ9|A0A0G2JJZ9_HUMAN;tr|A0A0A0MT12|A0A0A0MT12_HUMAN;tr|F6TRA5|F6TRA5_HUMAN;tr|F6S4E6|F6S4E6_HUMAN;tr|F6UJC5|F6UJC5_HUMAN;tr|F6R6M7|F6R6M7_HUMAN;tr|F6QYI9|F6QYI9_HUMAN;tr|A0A0G2JJL7|A0A0G2JJL7_HUMAN;tr|H0Y400|H0Y400_HUMAN;tr|A0A0G2JHN7|A0A0G2JHN7_HUMAN;tr|F6U6E2|F6U6E2_HUMAN;tr|F6S2B7|F6S2B7_HUMAN;tr|H0YCC6|H0YCC6_HUMAN	sp|Q13838|DX39B_HUMAN;tr|Q5STU3|Q5STU3_HUMAN;tr|F6WLT2|F6WLT2_HUMAN;tr|A0A0G2JJZ9|A0A0G2JJZ9_HUMAN;tr|A0A0A0MT12|A0A0A0MT12_HUMAN;tr|F6TRA5|F6TRA5_HUMAN;tr|F6S4E6|F6S4E6_HUMAN;tr|F6UJC5|F6UJC5_HUMAN	1.19149	0.865185	1.08465	1.14367	36175000	37926000	32735000	34531000	43102000	32813000	35506000	39492000	14;13;11;11;9;9;8;8;6;5;5;4;3;3;3;3	14;13;11;11;9;9;8;8;6;5;5;4;3;3;3;3	6;6;5;5;4;4;3;4;3;2;2;1;1;1;1;2	sp|Q13838|DX39B_HUMAN Spliceosome RNA helicase DDX39B OS=Homo sapiens GN=DDX39B PE=1 SV=1;tr|Q5STU3|Q5STU3_HUMAN Spliceosome RNA helicase DDX39B OS=Homo sapiens GN=DDX39B PE=1 SV=2;tr|F6WLT2|F6WLT2_HUMAN Spliceosome RNA helicase DDX39B (Fragment) OS=Homo s	16	14	14	6	7	9	7	11	10	10	13	10	7	9	7	11	10	10	13	10	2	3	3	4	5	4	6	3	38.1	38.1	20.8	48.991
sp|O75934|SPF27_HUMAN	sp|O75934|SPF27_HUMAN	1387100	1706900	0.685439	1.12259	1	1	1683300	1474800	1387100	1706900	1153800	1655600	3	3	3	sp|O75934|SPF27_HUMAN Pre-mRNA-splicing factor SPF27 OS=Homo sapiens GN=BCAS2 PE=1 SV=1	1	3	3	3	0	1	2	2	3	2	3	2	0	1	2	2	3	2	3	2	0	1	2	2	3	2	3	2	18.2	18.2	18.2	26.131
CON__P02769;tr|H0YA55|H0YA55_HUMAN;tr|D6RHD5|D6RHD5_HUMAN	CON__P02769	1.13256	0.694735	1.0191	1.11616	185130000	240840000	217770000	252490000	209670000	167320000	221930000	281820000	20;3;2	20;3;2	17;0;0		3	20	20	17	13	11	13	15	13	16	18	17	13	11	13	15	13	16	18	17	10	8	10	12	11	13	15	14	28	28	24.4	69.293
sp|Q99459|CDC5L_HUMAN	sp|Q99459|CDC5L_HUMAN	2.00195	1.39233	1.47406	1.11556	2724200	3435400	4265900	5618500	5453700	4783200	6288200	6267800	13	13	13	sp|Q99459|CDC5L_HUMAN Cell division cycle 5-like protein OS=Homo sapiens GN=CDC5L PE=1 SV=2	1	13	13	13	2	3	7	9	8	8	12	9	2	3	7	9	8	8	12	9	2	3	7	9	8	8	12	9	25.8	25.8	25.8	92.25
tr|H3BLU7|H3BLU7_HUMAN;sp|O43488|ARK72_HUMAN;sp|Q8NHP1|ARK74_HUMAN;tr|H7C5H7|H7C5H7_HUMAN	tr|H3BLU7|H3BLU7_HUMAN;sp|O43488|ARK72_HUMAN	1.78687	2.618	1.04455	1.11453	3577700	2382200	4386200	4761000	6392900	6236600	4581600	5306300	7;7;2;1	7;7;2;1	7;7;2;1	tr|H3BLU7|H3BLU7_HUMAN Aflatoxin B1 aldehyde reductase member 2 (Fragment) OS=Homo sapiens GN=AKR7A2 PE=1 SV=1;sp|O43488|ARK72_HUMAN Aflatoxin B1 aldehyde reductase member 2 OS=Homo sapiens GN=AKR7A2 PE=1 SV=3	4	7	7	7	2	2	4	4	5	5	5	5	2	2	4	4	5	5	5	5	2	2	4	4	5	5	5	5	28	28	28	34.684
sp|P07437|TBB5_HUMAN;tr|Q5JP53|Q5JP53_HUMAN;tr|Q5ST81|Q5ST81_HUMAN;tr|A0A0B4J269|A0A0B4J269_HUMAN;sp|Q13509|TBB3_HUMAN;sp|Q9BVA1|TBB2B_HUMAN;sp|P68371|TBB4B_HUMAN;sp|Q13885|TBB2A_HUMAN;sp|P04350|TBB4A_HUMAN;sp|Q3ZCM7|TBB8_HUMAN;CON__ENSEMBL:ENSBTAP00000025008;tr|F6U341|F6U341_HUMAN;sp|Q9H4B7|TBB1_HUMAN;sp|Q9BUF5|TBB6_HUMAN;tr|G3V5W4|G3V5W4_HUMAN;sp|A6NNZ2|TBB8L_HUMAN;tr|M0R042|M0R042_HUMAN;tr|I3L…	sp|P07437|TBB5_HUMAN;tr|Q5JP53|Q5JP53_HUMAN;tr|Q5ST81|Q5ST81_HUMAN;tr|A0A0B4J269|A0A0B4J269_HUMAN;sp|Q13509|TBB3_HUMAN;sp|Q9BVA1|TBB2B_HUMAN;sp|P68371|TBB4B_HUMAN;sp|Q13885|TBB2A_HUMAN	1630900	1752200	1.19847	1.10183	1	1	1494900	2078000	1630900	1752200	1791600	2289600	7;7;5;4;4;4;4;4;3;1;1;1;1;1;1;1;1;1;1;1;1;1;1;1;1;1	7;7;5;4;4;4;4;4;3;1;1;1;1;1;1;1;1;1;1;1;1;1;1;1;1;1	7;7;5;4;4;4;4;4;3;1;1;1;1;1;1;1;1;1;1;1;1;1;1;1;1;1	sp|P07437|TBB5_HUMAN Tubulin beta chain OS=Homo sapiens GN=TUBB PE=1 SV=2;tr|Q5JP53|Q5JP53_HUMAN Tubulin beta chain OS=Homo sapiens GN=TUBB PE=1 SV=1;tr|Q5ST81|Q5ST81_HUMAN Tubulin beta chain OS=Homo sapiens GN=TUBB PE=1 SV=1;tr|A0A0B4J269|A0A0B4J269_HUMAN	26	7	7	7	0	1	2	2	5	4	6	4	0	1	2	2	5	4	6	4	0	1	2	2	5	4	6	4	19.4	19.4	19.4	49.67
tr|F8VQ14|F8VQ14_HUMAN;sp|P78371|TCPB_HUMAN;tr|F5GWF6|F5GWF6_HUMAN	tr|F8VQ14|F8VQ14_HUMAN;sp|P78371|TCPB_HUMAN;tr|F5GWF6|F5GWF6_HUMAN	1586400	0.909656	0.568004	1.09854	1	2783800	3024800	2642500	1586400	2532300	1718100	2902900	6;6;6	6;6;6	6;6;6	tr|F8VQ14|F8VQ14_HUMAN T-complex protein 1 subunit beta OS=Homo sapiens GN=CCT2 PE=1 SV=1;sp|P78371|TCPB_HUMAN T-complex protein 1 subunit beta OS=Homo sapiens GN=CCT2 PE=1 SV=4;tr|F5GWF6|F5GWF6_HUMAN T-complex protein 1 subunit beta OS=Homo sapiens GN=CCT	3	6	6	6	1	2	2	4	5	5	4	4	1	2	2	4	5	5	4	4	1	2	2	4	5	5	4	4	21.4	21.4	21.4	44.812
sp|P31153|METK2_HUMAN;sp|Q00266|METK1_HUMAN	sp|P31153|METK2_HUMAN	1	1	1109400	1.07439	1	1	1	1023000	1	1	1109400	1099100	5;1	5;1	5;1	sp|P31153|METK2_HUMAN S-adenosylmethionine synthase isoform type-2 OS=Homo sapiens GN=MAT2A PE=1 SV=1	2	5	5	5	0	0	1	2	2	2	3	2	0	0	1	2	2	2	3	2	0	0	1	2	2	2	3	2	14.7	14.7	14.7	43.66
sp|P38919|IF4A3_HUMAN;tr|I3L3H2|I3L3H2_HUMAN;tr|J3KT12|J3KT12_HUMAN;tr|J3QS69|J3QS69_HUMAN;tr|J3QL43|J3QL43_HUMAN;tr|J3QL52|J3QL52_HUMAN;tr|J3QLN6|J3QLN6_HUMAN;tr|J3KTB5|J3KTB5_HUMAN;tr|J3KSZ0|J3KSZ0_HUMAN;tr|J3KS25|J3KS25_HUMAN;tr|J3QKZ9|J3QKZ9_HUMAN;tr|J3KT04|J3KT04_HUMAN;tr|J3KTN0|J3KTN0_HUMAN;tr|J3KSN7|J3KSN7_HUMAN;tr|E7EMV8|E7EMV8_HUMAN;tr|F8WE11|F8WE11_HUMAN;tr|E9PBH4|E9PBH4_HUMAN;tr|J3QQP0…	sp|P38919|IF4A3_HUMAN	1.21009	0.986585	0.969429	1.07323	35327000	33321000	32449000	29306000	42749000	32874000	31457000	31452000	19;4;2;2;2;1;1;1;1;1;1;1;1;1;1;1;1;1;1;1	19;4;2;2;2;1;1;1;1;1;1;1;1;1;1;1;1;1;1;1	17;3;0;0;0;0;0;0;0;0;0;0;0;0;0;0;0;0;0;0	sp|P38919|IF4A3_HUMAN Eukaryotic initiation factor 4A-III OS=Homo sapiens GN=EIF4A3 PE=1 SV=4	20	19	19	17	14	12	16	16	13	15	15	14	14	12	16	16	13	15	15	14	12	10	14	14	11	13	13	13	43.3	43.3	37.5	46.871
sp|Q9UMS4|PRP19_HUMAN;tr|F5GY56|F5GY56_HUMAN;tr|H0YGF3|H0YGF3_HUMAN;tr|F5H2I0|F5H2I0_HUMAN;tr|H0YGZ5|H0YGZ5_HUMAN	sp|Q9UMS4|PRP19_HUMAN	1.28511	1.39871	1.35163	1.06877	10908000	9193500	10622000	14395000	14018000	12859000	14357000	15385000	12;5;2;2;1	12;5;2;2;1	12;5;2;2;1	sp|Q9UMS4|PRP19_HUMAN Pre-mRNA-processing factor 19 OS=Homo sapiens GN=PRPF19 PE=1 SV=1	5	12	12	12	6	5	7	6	7	7	8	7	6	5	7	6	7	7	8	7	6	5	7	6	7	7	8	7	30.4	30.4	30.4	55.18
sp|Q8N163|CCAR2_HUMAN;tr|H0YC69|H0YC69_HUMAN;tr|E5RFJ3|E5RFJ3_HUMAN;tr|H0YC58|H0YC58_HUMAN;tr|E5RGU7|E5RGU7_HUMAN;tr|E5RHJ4|E5RHJ4_HUMAN;tr|G3V119|G3V119_HUMAN;tr|H0YB24|H0YB24_HUMAN	sp|Q8N163|CCAR2_HUMAN;tr|H0YC69|H0YC69_HUMAN;tr|E5RFJ3|E5RFJ3_HUMAN;tr|H0YC58|H0YC58_HUMAN	3016900	2114700	1.039	1.0662	1	1	2356400	2359400	3016900	2114700	2448300	2515600	7;4;4;4;3;2;2;2	7;4;4;4;3;2;2;2	7;4;4;4;3;2;2;2	sp|Q8N163|CCAR2_HUMAN Cell cycle and apoptosis regulator protein 2 OS=Homo sapiens GN=CCAR2 PE=1 SV=2;tr|H0YC69|H0YC69_HUMAN Cell cycle and apoptosis regulator protein 2 (Fragment) OS=Homo sapiens GN=CCAR2 PE=1 SV=1;tr|E5RFJ3|E5RFJ3_HUMAN Cell cycle and ap	8	7	7	7	0	0	4	4	5	5	4	5	0	0	4	4	5	5	4	5	0	0	4	4	5	5	4	5	10.1	10.1	10.1	102.9
sp|O14744|ANM5_HUMAN;tr|G3V580|G3V580_HUMAN;tr|H0YJX6|H0YJX6_HUMAN;tr|G3V5L5|G3V5L5_HUMAN;tr|G3V2L6|G3V2L6_HUMAN;tr|C9JSX3|C9JSX3_HUMAN;tr|G3V2X6|G3V2X6_HUMAN;tr|H0YJD3|H0YJD3_HUMAN;tr|H0YJ77|H0YJ77_HUMAN;tr|H7BZ44|H7BZ44_HUMAN;tr|G3V507|G3V507_HUMAN;tr|G3V2F5|G3V2F5_HUMAN;tr|G3V5T6|G3V5T6_HUMAN	sp|O14744|ANM5_HUMAN;tr|G3V580|G3V580_HUMAN	1.25529	1.23176	1.07895	1.06446	201500000	196020000	182390000	197010000	252940000	241450000	196790000	209710000	22;12;9;8;8;8;7;4;3;3;2;2;1	22;12;9;8;8;8;7;4;3;3;2;2;1	22;12;9;8;8;8;7;4;3;3;2;2;1	sp|O14744|ANM5_HUMAN Protein arginine N-methyltransferase 5 OS=Homo sapiens GN=PRMT5 PE=1 SV=4;tr|G3V580|G3V580_HUMAN Protein arginine N-methyltransferase 5 (Fragment) OS=Homo sapiens GN=PRMT5 PE=1 SV=1	13	22	22	22	16	14	17	16	17	17	19	16	16	14	17	16	17	17	19	16	16	14	17	16	17	17	19	16	36.7	36.7	36.7	72.683
tr|E9PMP7|E9PMP7_HUMAN;tr|E9PLU6|E9PLU6_HUMAN;tr|E9PK58|E9PK58_HUMAN;tr|E9PJ10|E9PJ10_HUMAN	tr|E9PMP7|E9PMP7_HUMAN	4801800	3698000	2.09995	1.06437	1	1	1464700	2606900	4801800	3698000	3075800	2774700	16;2;2;2	16;2;2;2	0;0;0;0	tr|E9PMP7|E9PMP7_HUMAN LIM domain only protein 7 (Fragment) OS=Homo sapiens GN=LMO7 PE=1 SV=5	4	16	16	0	0	0	2	4	10	6	6	8	0	0	2	4	10	6	6	8	0	0	0	0	0	0	0	0	24.1	24.1	0	119.52
sp|P39019|RS19_HUMAN;tr|M0R2L9|M0R2L9_HUMAN;tr|M0QXK4|M0QXK4_HUMAN;tr|M0QYF7|M0QYF7_HUMAN;tr|M0R140|M0R140_HUMAN;tr|A0A075B6E2|A0A075B6E2_HUMAN	sp|P39019|RS19_HUMAN;tr|M0R2L9|M0R2L9_HUMAN;tr|M0QXK4|M0QXK4_HUMAN;tr|M0QYF7|M0QYF7_HUMAN;tr|M0R140|M0R140_HUMAN	2395800	2179200	1.12004	1.06183	1	1	2699100	2912700	2395800	2179200	3023100	3092800	7;4;4;4;4;3	7;4;4;4;4;3	7;4;4;4;4;3	sp|P39019|RS19_HUMAN 40S ribosomal protein S19 OS=Homo sapiens GN=RPS19 PE=1 SV=2;tr|M0R2L9|M0R2L9_HUMAN 40S ribosomal protein S19 (Fragment) OS=Homo sapiens GN=RPS19 PE=1 SV=1;tr|M0QXK4|M0QXK4_HUMAN 40S ribosomal protein S19 (Fragment) OS=Homo sapiens GN=	6	7	7	7	1	1	3	3	4	3	6	7	1	1	3	3	4	3	6	7	1	1	3	3	4	3	6	7	36.6	36.6	36.6	16.06
sp|Q07955|SRSF1_HUMAN;tr|J3KTL2|J3KTL2_HUMAN;tr|J3QQV5|J3QQV5_HUMAN;tr|J3KSW7|J3KSW7_HUMAN;tr|J3KSR8|J3KSR8_HUMAN	sp|Q07955|SRSF1_HUMAN;tr|J3KTL2|J3KTL2_HUMAN	2208600	1734700	2471000	1.05751	1	1	1	2450200	2208600	1734700	2471000	2591100	6;6;2;2;2	6;6;2;2;2	5;5;2;2;2	sp|Q07955|SRSF1_HUMAN Serine/arginine-rich splicing factor 1 OS=Homo sapiens GN=SRSF1 PE=1 SV=2;tr|J3KTL2|J3KTL2_HUMAN Serine/arginine-rich-splicing factor 1 OS=Homo sapiens GN=SRSF1 PE=1 SV=1	5	6	6	5	1	1	1	3	3	4	2	3	1	1	1	3	3	4	2	3	1	1	1	2	3	3	2	3	18.5	18.5	15.7	27.744
sp|P62995|TRA2B_HUMAN;tr|H7BXF3|H7BXF3_HUMAN;tr|H7C2L4|H7C2L4_HUMAN	sp|P62995|TRA2B_HUMAN;tr|H7BXF3|H7BXF3_HUMAN	1.35868	2.3536	1.19558	1.05332	4669900	4164600	7879000	8965200	6344900	9801800	9420000	9443200	7;5;3	7;5;3	5;3;3	sp|P62995|TRA2B_HUMAN Transformer-2 protein homolog beta OS=Homo sapiens GN=TRA2B PE=1 SV=1;tr|H7BXF3|H7BXF3_HUMAN Transformer-2 protein homolog beta (Fragment) OS=Homo sapiens GN=TRA2B PE=1 SV=1	3	7	7	5	4	3	5	4	5	5	5	4	4	3	5	4	5	5	5	4	4	3	4	4	4	4	4	4	24	24	20.5	33.665
sp|P62316|SMD2_HUMAN;tr|K7ERG4|K7ERG4_HUMAN;tr|K7EJB5|K7EJB5_HUMAN	sp|P62316|SMD2_HUMAN;tr|K7ERG4|K7ERG4_HUMAN	0.996108	0.789926	0.991043	1.0494	9790400	12031000	10495000	9117400	9752300	9503600	10401000	9567800	5;3;2	5;3;2	5;3;2	sp|P62316|SMD2_HUMAN Small nuclear ribonucleoprotein Sm D2 OS=Homo sapiens GN=SNRPD2 PE=1 SV=1;tr|K7ERG4|K7ERG4_HUMAN Small nuclear ribonucleoprotein Sm D2 OS=Homo sapiens GN=SNRPD2 PE=1 SV=1	3	5	5	5	4	4	4	5	4	3	5	5	4	4	4	5	4	3	5	5	4	4	4	5	4	3	5	5	39	39	39	13.527
sp|Q8N7H5|PAF1_HUMAN;tr|B4DGJ5|B4DGJ5_HUMAN	sp|Q8N7H5|PAF1_HUMAN;tr|B4DGJ5|B4DGJ5_HUMAN	1753300	4.42087e-07	0.829212	1.04876	1	2262000	1650000	1378300	1753300	1	1368200	1445500	8;5	8;5	8;5	sp|Q8N7H5|PAF1_HUMAN RNA polymerase II-associated factor 1 homolog OS=Homo sapiens GN=PAF1 PE=1 SV=2;tr|B4DGJ5|B4DGJ5_HUMAN RNA polymerase II-associated factor 1 homolog OS=Homo sapiens GN=PAF1 PE=1 SV=1	2	8	8	8	0	2	2	2	4	1	4	6	0	2	2	2	4	1	4	6	0	2	2	2	4	1	4	6	17.9	17.9	17.9	59.975
sp|Q9BUA3|CK084_HUMAN;tr|H0YGY5|H0YGY5_HUMAN;tr|H0YGK9|H0YGK9_HUMAN	sp|Q9BUA3|CK084_HUMAN	1.09417	1.04878	1.00105	1.04777	11224000	11972000	13310000	11325000	12281000	12556000	13324000	11866000	10;2;1	10;2;1	10;2;1	sp|Q9BUA3|CK084_HUMAN Uncharacterized protein C11orf84 OS=Homo sapiens GN=C11orf84 PE=1 SV=3	3	10	10	10	3	4	5	7	9	7	7	7	3	4	5	7	9	7	7	7	3	4	5	7	9	7	7	7	50.4	50.4	50.4	41.036
sp|Q15029|U5S1_HUMAN;tr|K7EP67|K7EP67_HUMAN;tr|K7EJ74|K7EJ74_HUMAN	sp|Q15029|U5S1_HUMAN	1.27331	1.04605	0.959726	1.03927	19414000	20067000	21776000	23248000	24720000	20991000	20899000	24161000	28;9;5	28;9;5	27;8;4	sp|Q15029|U5S1_HUMAN 116 kDa U5 small nuclear ribonucleoprotein component OS=Homo sapiens GN=EFTUD2 PE=1 SV=1	3	28	28	27	13	11	15	15	17	19	19	19	13	11	15	15	17	19	19	19	13	10	15	15	17	19	19	18	35.7	35.7	34.7	109.43
sp|P62136|PP1A_HUMAN;tr|E9PMD7|E9PMD7_HUMAN;tr|F5H1L6|F5H1L6_HUMAN;tr|F5H037|F5H037_HUMAN	sp|P62136|PP1A_HUMAN;tr|E9PMD7|E9PMD7_HUMAN	2816800	2028000	1.30106	1.03769	1	1	2261000	2191800	2816800	2028000	2941700	2274400	6;5;1;1	6;5;1;1	3;2;1;1	sp|P62136|PP1A_HUMAN Serine/threonine-protein phosphatase PP1-alpha catalytic subunit OS=Homo sapiens GN=PPP1CA PE=1 SV=1;tr|E9PMD7|E9PMD7_HUMAN Serine/threonine-protein phosphatase (Fragment) OS=Homo sapiens GN=PPP1CA PE=1 SV=1	4	6	6	3	0	0	3	2	4	3	3	5	0	0	3	2	4	3	3	5	0	0	2	1	3	2	2	2	18.8	18.8	11.2	37.512
sp|O15269|SPTC1_HUMAN;tr|A0A0D9SER6|A0A0D9SER6_HUMAN;tr|A0A0D9SG83|A0A0D9SG83_HUMAN;tr|A4QPE4|A4QPE4_HUMAN;tr|A0A0G2JNM9|A0A0G2JNM9_HUMAN;tr|K7ELU0|K7ELU0_HUMAN;tr|C9JY79|C9JY79_HUMAN;tr|E9PQ05|E9PQ05_HUMAN	sp|O15269|SPTC1_HUMAN;tr|A0A0D9SER6|A0A0D9SER6_HUMAN	1.15836	0.981119	1.0894	1.00948	94211000	103810000	89203000	84350000	109130000	101850000	97178000	85150000	116;105;6;6;2;2;2;1	116;105;6;6;2;2;2;1	4;1;0;0;0;0;0;0	sp|O15269|SPTC1_HUMAN Serine palmitoyltransferase 1 OS=Homo sapiens GN=SPTLC1 PE=1 SV=1;tr|A0A0D9SER6|A0A0D9SER6_HUMAN Zinc finger protein 630 (Fragment) OS=Homo sapiens GN=ZNF630 PE=4 SV=1	8	116	116	4	48	45	64	58	84	85	82	87	48	45	64	58	84	85	82	87	1	1	1	1	3	2	2	3	11.1	11.1	0.5	1346.9
sp|Q8NHX4|SPTA3_HUMAN;tr|A0A087WWT4|A0A087WWT4_HUMAN;tr|F8WBR8|F8WBR8_HUMAN	sp|Q8NHX4|SPTA3_HUMAN;tr|A0A087WWT4|A0A087WWT4_HUMAN	1.14464	1.04884	1.07228	1.00624	63076000	62496000	61154000	60463000	72199000	65548000	65574000	60840000	73;72;21	66;65;15	66;65;15	sp|Q8NHX4|SPTA3_HUMAN Spermatogenesis-associated protein 3 OS=Homo sapiens GN=SPATA3 PE=2 SV=2;tr|A0A087WWT4|A0A087WWT4_HUMAN Tetraspanin OS=Homo sapiens GN=TSPAN10 PE=1 SV=1	3	73	66	66	36	34	48	43	54	60	55	56	33	32	45	42	50	55	50	51	33	32	45	42	50	55	50	51	19.3	17.5	17.5	556.97
sp|P07355|ANXA2_HUMAN;tr|H0YN42|H0YN42_HUMAN;tr|H0YMU9|H0YMU9_HUMAN;tr|H0YMD0|H0YMD0_HUMAN;tr|H0YKS4|H0YKS4_HUMAN;sp|A6NMY6|AXA2L_HUMAN;tr|H0YM50|H0YM50_HUMAN;tr|H0YNP5|H0YNP5_HUMAN;tr|H0YMM1|H0YMM1_HUMAN;tr|H0YMW4|H0YMW4_HUMAN;tr|H0YL33|H0YL33_HUMAN;tr|H0YKX9|H0YKX9_HUMAN;tr|H0YMT9|H0YMT9_HUMAN;tr|H0YLV6|H0YLV6_HUMAN;tr|H0YKZ7|H0YKZ7_HUMAN;tr|H0YN28|H0YN28_HUMAN;tr|H0YKL9|H0YKL9_HUMAN;tr|H0YKV8|…	sp|P07355|ANXA2_HUMAN;tr|H0YN42|H0YN42_HUMAN;tr|H0YMU9|H0YMU9_HUMAN;tr|H0YMD0|H0YMD0_HUMAN;tr|H0YKS4|H0YKS4_HUMAN;sp|A6NMY6|AXA2L_HUMAN;tr|H0YM50|H0YM50_HUMAN;tr|H0YNP5|H0YNP5_HUMAN;tr|H0YMM1|H0YMM1_HUMAN	1.25778	1.14333	0.850312	1.00582	5841700	4659800	5521500	5117300	7347600	5327700	4695000	5147100	13;12;12;12;9;8;8;7;7;6;6;6;6;6;6;6;5;5;5;4;3;3;2;1	13;12;12;12;9;8;8;7;7;6;6;6;6;6;6;6;5;5;5;4;3;3;2;1	13;12;12;12;9;8;8;7;7;6;6;6;6;6;6;6;5;5;5;4;3;3;2;1	sp|P07355|ANXA2_HUMAN Annexin A2 OS=Homo sapiens GN=ANXA2 PE=1 SV=2;tr|H0YN42|H0YN42_HUMAN Annexin (Fragment) OS=Homo sapiens GN=ANXA2 PE=1 SV=1;tr|H0YMU9|H0YMU9_HUMAN Annexin OS=Homo sapiens GN=ANXA2 PE=1 SV=1;tr|H0YMD0|H0YMD0_HUMAN Annexin (Fragment) OS=	24	13	13	13	5	3	8	8	12	8	10	9	5	3	8	8	12	8	10	9	5	3	8	8	12	8	10	9	39.8	39.8	39.8	38.604
tr|Q5T6W2|Q5T6W2_HUMAN;tr|S4R457|S4R457_HUMAN	tr|Q5T6W2|Q5T6W2_HUMAN	0.908507	1.12858	1.15115	1.00468	258270000	234250000	180680000	228420000	234640000	264370000	207990000	229490000	21;4	21;4	1;0	tr|Q5T6W2|Q5T6W2_HUMAN Heterogeneous nuclear ribonucleoprotein K (Fragment) OS=Homo sapiens GN=HNRNPK PE=1 SV=1	2	21	21	1	16	14	17	19	19	15	17	18	16	14	17	19	19	15	17	18	0	0	1	1	1	0	0	1	37.3	37.3	2.1	61.755
sp|Q15717|ELAV1_HUMAN;tr|M0QZR9|M0QZR9_HUMAN;tr|M0R055|M0R055_HUMAN;tr|B1AM48|B1AM48_HUMAN;sp|Q12926|ELAV2_HUMAN;tr|B1APY9|B1APY9_HUMAN;sp|P26378|ELAV4_HUMAN;tr|B1APY8|B1APY8_HUMAN;tr|A0A0A0MRX1|A0A0A0MRX1_HUMAN	sp|Q15717|ELAV1_HUMAN;tr|M0QZR9|M0QZR9_HUMAN	1.12248	0.907739	0.715922	1.00296	2154700	1728800	2016700	2362000	2418600	1569300	1443800	2369000	5;3;1;1;1;1;1;1;1	5;3;1;1;1;1;1;1;1	5;3;1;1;1;1;1;1;1	sp|Q15717|ELAV1_HUMAN ELAV-like protein 1 OS=Homo sapiens GN=ELAVL1 PE=1 SV=2;tr|M0QZR9|M0QZR9_HUMAN ELAV-like protein 1 OS=Homo sapiens GN=ELAVL1 PE=1 SV=1	9	5	5	5	3	2	4	4	4	3	2	4	3	2	4	4	4	3	2	4	3	2	4	4	4	3	2	4	17.8	17.8	17.8	36.091
sp|P61964|WDR5_HUMAN;tr|V9GZ59|V9GZ59_HUMAN	sp|P61964|WDR5_HUMAN	1727600	1611100	1644900	1.00243	1	1	1	1398300	1727600	1611100	1644900	1401700	4;1	4;1	4;1	sp|P61964|WDR5_HUMAN WD repeat-containing protein 5 OS=Homo sapiens GN=WDR5 PE=1 SV=1	2	4	4	4	1	0	0	3	2	2	3	3	1	0	0	3	2	2	3	3	1	0	0	3	2	2	3	3	17.1	17.1	17.1	36.588
sp|P09661|RU2A_HUMAN;tr|Q8TDP4|Q8TDP4_HUMAN;tr|H0YMA0|H0YMA0_HUMAN;tr|H0YLR3|H0YLR3_HUMAN	sp|P09661|RU2A_HUMAN;tr|Q8TDP4|Q8TDP4_HUMAN;tr|H0YMA0|H0YMA0_HUMAN	1.14228	0.836966	0.957994	1.00144	6698200	7253700	7839400	7520100	7651200	6071100	7510100	7530900	8;5;4;3	8;5;4;3	8;5;4;3	sp|P09661|RU2A_HUMAN U2 small nuclear ribonucleoprotein A OS=Homo sapiens GN=SNRPA1 PE=1 SV=2;tr|Q8TDP4|Q8TDP4_HUMAN C-C chemokine receptor type 3 (Fragment) OS=Homo sapiens GN=CCR3 PE=2 SV=1;tr|H0YMA0|H0YMA0_HUMAN U2 small nuclear ribonucleoprotein A (F	4	8	8	8	6	6	4	6	4	5	5	5	6	6	4	6	4	5	5	5	6	6	4	6	4	5	5	5	33.7	33.7	33.7	28.415
sp|Q9Y2W1|TR150_HUMAN	sp|Q9Y2W1|TR150_HUMAN	1.11681	1.04371	0.970429	0.988782	183120000	185310000	193770000	180960000	204510000	193410000	188040000	178930000	44	43	43	sp|Q9Y2W1|TR150_HUMAN Thyroid hormone receptor-associated protein 3 OS=Homo sapiens GN=THRAP3 PE=1 SV=2	1	44	43	43	25	31	28	33	33	36	33	35	24	30	28	32	32	36	32	35	24	30	28	32	32	36	32	35	37.4	37.4	37.4	108.66
sp|Q15393|SF3B3_HUMAN;tr|J3QRB2|J3QRB2_HUMAN;tr|J3QL37|J3QL37_HUMAN;tr|I3L4G7|I3L4G7_HUMAN;tr|H3BMB0|H3BMB0_HUMAN	sp|Q15393|SF3B3_HUMAN	1.21919	0.747229	0.908738	0.988143	8575400	11603000	11319000	10880000	10455000	8670100	10286000	10751000	20;2;2;2;1	20;2;2;2;1	20;2;2;2;1	sp|Q15393|SF3B3_HUMAN Splicing factor 3B subunit 3 OS=Homo sapiens GN=SF3B3 PE=1 SV=4	5	20	20	20	6	8	12	10	15	10	12	14	6	8	12	10	15	10	12	14	6	8	12	10	15	10	12	14	20	20	20	135.58
sp|Q9NYL9|TMOD3_HUMAN;tr|H0YKU1|H0YKU1_HUMAN;tr|H0YNJ8|H0YNJ8_HUMAN;sp|Q9NZR1|TMOD2_HUMAN;sp|P28289|TMOD1_HUMAN;tr|D6R933|D6R933_HUMAN	sp|Q9NYL9|TMOD3_HUMAN;tr|H0YKU1|H0YKU1_HUMAN;tr|H0YNJ8|H0YNJ8_HUMAN	5290500	4794200	5484100	0.979092	1	1	1	3438900	5290500	4794200	5484100	3367000	13;8;8;1;1;1	13;8;8;1;1;1	13;8;8;1;1;1	sp|Q9NYL9|TMOD3_HUMAN Tropomodulin-3 OS=Homo sapiens GN=TMOD3 PE=1 SV=1;tr|H0YKU1|H0YKU1_HUMAN Tropomodulin-3 (Fragment) OS=Homo sapiens GN=TMOD3 PE=1 SV=1;tr|H0YNJ8|H0YNJ8_HUMAN Tropomodulin-3 OS=Homo sapiens GN=TMOD3 PE=1 SV=1	6	13	13	13	0	0	0	5	6	10	6	5	0	0	0	5	6	10	6	5	0	0	0	5	6	10	6	5	44.6	44.6	44.6	39.594
sp|Q13573|SNW1_HUMAN;tr|G3V4X8|G3V4X8_HUMAN;tr|G3V3A4|G3V3A4_HUMAN;tr|G3V5R3|G3V5R3_HUMAN	sp|Q13573|SNW1_HUMAN;tr|G3V4X8|G3V4X8_HUMAN;tr|G3V3A4|G3V3A4_HUMAN	0.557635	0.789077	0.990161	0.973706	7022700	5711100	4898800	4993500	3916100	4506500	4850600	4862200	13;10;10;4	13;10;10;4	13;10;10;4	sp|Q13573|SNW1_HUMAN SNW domain-containing protein 1 OS=Homo sapiens GN=SNW1 PE=1 SV=1;tr|G3V4X8|G3V4X8_HUMAN SNW domain-containing protein 1 OS=Homo sapiens GN=SNW1 PE=1 SV=1;tr|G3V3A4|G3V3A4_HUMAN SNW domain-containing protein 1 OS=Homo sapiens GN=SNW1 P	4	13	13	13	4	3	6	6	8	8	8	9	4	3	6	6	8	8	8	9	4	3	6	6	8	8	8	9	26.5	26.5	26.5	61.494
sp|P14866|HNRPL_HUMAN;tr|M0QXS5|M0QXS5_HUMAN;tr|M0R1W6|M0R1W6_HUMAN;tr|M0QYT0|M0QYT0_HUMAN;tr|B4DVF8|B4DVF8_HUMAN;tr|M0QYL7|M0QYL7_HUMAN;tr|M0R076|M0R076_HUMAN	sp|P14866|HNRPL_HUMAN;tr|M0QXS5|M0QXS5_HUMAN	1.86297	1.14906	0.999671	0.972611	4458800	6436300	6991700	5432800	8306600	7395700	6989400	5284000	11;10;4;4;3;3;2	11;10;4;4;3;3;2	11;10;4;4;3;3;2	sp|P14866|HNRPL_HUMAN Heterogeneous nuclear ribonucleoprotein L OS=Homo sapiens GN=HNRNPL PE=1 SV=2;tr|M0QXS5|M0QXS5_HUMAN Heterogeneous nuclear ribonucleoprotein L (Fragment) OS=Homo sapiens GN=HNRNPL PE=1 SV=1	7	11	11	11	2	4	7	4	7	6	5	7	2	4	7	4	7	6	5	7	2	4	7	4	7	6	5	7	24.3	24.3	24.3	64.132
sp|Q9Y3B4|SF3B6_HUMAN	sp|Q9Y3B4|SF3B6_HUMAN	0.66156	1.24028	1.11442	0.9721	2976300	1923600	2312500	2476700	1969000	2385800	2577100	2407600	4	4	4	sp|Q9Y3B4|SF3B6_HUMAN Splicing factor 3B subunit 6 OS=Homo sapiens GN=SF3B6 PE=1 SV=1	1	4	4	4	2	2	3	3	4	3	3	3	2	2	3	3	4	3	3	3	2	2	3	3	4	3	3	3	36.8	36.8	36.8	14.585
tr|H0YEN5|H0YEN5_HUMAN;tr|E9PQD7|E9PQD7_HUMAN;sp|P15880|RS2_HUMAN;tr|E9PMM9|E9PMM9_HUMAN;tr|H3BNG3|H3BNG3_HUMAN;tr|H0YE27|H0YE27_HUMAN;tr|I3L404|I3L404_HUMAN;tr|E9PPT0|E9PPT0_HUMAN;tr|E9PM36|E9PM36_HUMAN	tr|H0YEN5|H0YEN5_HUMAN;tr|E9PQD7|E9PQD7_HUMAN;sp|P15880|RS2_HUMAN;tr|E9PMM9|E9PMM9_HUMAN	1	1	1265400	0.971356	1	1	1	1337100	1	1	1265400	1298800	4;4;4;2;1;1;1;1;1	4;4;4;2;1;1;1;1;1	4;4;4;2;1;1;1;1;1	tr|H0YEN5|H0YEN5_HUMAN 40S ribosomal protein S2 (Fragment) OS=Homo sapiens GN=RPS2 PE=1 SV=1;tr|E9PQD7|E9PQD7_HUMAN 40S ribosomal protein S2 OS=Homo sapiens GN=RPS2 PE=1 SV=1;sp|P15880|RS2_HUMAN 40S ribosomal protein S2 OS=Homo sapiens GN=RPS2 PE=1 SV=2;tr	9	4	4	4	0	0	0	2	1	1	3	4	0	0	0	2	1	1	3	4	0	0	0	2	1	1	3	4	24.1	24.1	24.1	21.154
sp|Q8IWI9|MGAP_HUMAN;tr|H3BP52|H3BP52_HUMAN;tr|H3BTF4|H3BTF4_HUMAN;tr|H3BTN2|H3BTN2_HUMAN	sp|Q8IWI9|MGAP_HUMAN	1.08133	0.821747	0.810048	0.969588	54161000	61065000	56509000	46265000	58566000	50180000	45775000	44858000	53;11;11;1	53;11;11;1	34;11;11;1	sp|Q8IWI9|MGAP_HUMAN MAX gene-associated protein OS=Homo sapiens GN=MGA PE=1 SV=3	4	53	53	34	24	26	30	35	35	31	36	34	24	26	30	35	35	31	36	34	14	12	17	21	23	16	21	19	11.4	11.4	7.4	620.91
sp|Q15782|CH3L2_HUMAN;tr|J3QRJ1|J3QRJ1_HUMAN;tr|C9JW33|C9JW33_HUMAN;tr|H7C408|H7C408_HUMAN;tr|C9JSB1|C9JSB1_HUMAN;tr|C9JEI3|C9JEI3_HUMAN	sp|Q15782|CH3L2_HUMAN	2064400	1617400	1.2301	0.969403	1	1	1782300	1866200	2064400	1617400	2192400	1809100	7;3;2;2;1;1	7;3;2;2;1;1	7;3;2;2;1;1	sp|Q15782|CH3L2_HUMAN Chitinase-3-like protein 2 OS=Homo sapiens GN=CHI3L2 PE=1 SV=1	6	7	7	7	0	0	2	5	4	3	3	5	0	0	2	5	4	3	3	5	0	0	2	5	4	3	3	5	9.2	9.2	9.2	112.58
sp|Q15149|PLEC_HUMAN;tr|E9PKG0|E9PKG0_HUMAN;tr|H0YDN1|H0YDN1_HUMAN;tr|E9PIA2|E9PIA2_HUMAN;tr|E9PQ28|E9PQ28_HUMAN;tr|A0A075B730|A0A075B730_HUMAN;tr|A0A087X1U6|A0A087X1U6_HUMAN;sp|P58107|EPIPL_HUMAN;sp|A1Z1Q3|MACD2_HUMAN;tr|H3BLW6|H3BLW6_HUMAN;tr|J3KNG8|J3KNG8_HUMAN	sp|Q15149|PLEC_HUMAN	1.23106	1.05063	1.11123	0.965915	72639000	77960000	67545000	64779000	89423000	81907000	75058000	62571000	109;6;5;2;2;2;2;2;1;1;1	109;6;5;2;2;2;2;2;1;1;1	91;0;5;0;0;2;2;2;1;1;1	sp|Q15149|PLEC_HUMAN Plectin OS=Homo sapiens GN=PLEC PE=1 SV=3	11	109	109	91	45	51	59	59	68	71	69	68	45	51	59	59	68	71	69	68	32	38	44	44	55	56	54	53	26.3	26.3	21.8	531.78
sp|Q8WWY3|PRP31_HUMAN;tr|E7EVX8|E7EVX8_HUMAN;tr|E7EU94|E7EU94_HUMAN;tr|E7ESX0|E7ESX0_HUMAN;tr|E7EN72|E7EN72_HUMAN	sp|Q8WWY3|PRP31_HUMAN;tr|E7EVX8|E7EVX8_HUMAN	0.954386	1.04878	0.946516	0.965825	29289000	25070000	25054000	23438000	27953000	26293000	23714000	22637000	17;16;8;8;8	17;16;8;8;8	17;16;8;8;8	sp|Q8WWY3|PRP31_HUMAN U4/U6 small nuclear ribonucleoprotein Prp31 OS=Homo sapiens GN=PRPF31 PE=1 SV=2;tr|E7EVX8|E7EVX8_HUMAN U4/U6 small nuclear ribonucleoprotein Prp31 OS=Homo sapiens GN=PRPF31 PE=1 SV=1	5	17	17	17	7	9	9	9	10	11	10	11	7	9	9	9	10	11	10	11	7	9	9	9	10	11	10	11	39.1	39.1	39.1	55.455
tr|A8MXP9|A8MXP9_HUMAN;sp|P43243|MATR3_HUMAN;tr|D6REM6|D6REM6_HUMAN;tr|D6R991|D6R991_HUMAN;tr|H0Y8T4|H0Y8T4_HUMAN;tr|B3KM87|B3KM87_HUMAN;tr|D6R8Z5|D6R8Z5_HUMAN;tr|Q68E03|Q68E03_HUMAN;tr|D6RE02|D6RE02_HUMAN;tr|D6RIA2|D6RIA2_HUMAN;tr|D6RB45|D6RB45_HUMAN;tr|D6R9F3|D6R9F3_HUMAN;tr|D6RBI2|D6RBI2_HUMAN;tr|D6REK4|D6REK4_HUMAN;tr|D6RCM3|D6RCM3_HUMAN;tr|D6RBS2|D6RBS2_HUMAN;tr|D6RAY2|D6RAY2_HUMAN;tr|D6RAM9…	tr|A8MXP9|A8MXP9_HUMAN;sp|P43243|MATR3_HUMAN;tr|D6REM6|D6REM6_HUMAN;tr|D6R991|D6R991_HUMAN	1.12529	1.21709	1.20302	0.965647	36109000	32783000	33746000	32748000	40633000	39900000	40597000	31623000	24;24;23;19;8;7;3;3;2;2;2;2;2;2;2;2;2;2;1	24;24;23;19;8;7;3;3;2;2;2;2;2;2;2;2;2;2;1	24;24;23;19;8;7;3;3;2;2;2;2;2;2;2;2;2;2;1	tr|A8MXP9|A8MXP9_HUMAN Matrin-3 OS=Homo sapiens GN=MATR3 PE=1 SV=1;sp|P43243|MATR3_HUMAN Matrin-3 OS=Homo sapiens GN=MATR3 PE=1 SV=2;tr|D6REM6|D6REM6_HUMAN Matrin-3 OS=Homo sapiens GN=MATR3 PE=1 SV=1;tr|D6R991|D6R991_HUMAN Matrin-3 (Fragment) OS=Homo sapie	19	24	24	24	13	14	15	14	19	19	18	18	13	14	15	14	19	19	18	18	13	14	15	14	19	19	18	18	31.1	31.1	31.1	99.966
sp|Q9NYF8|BCLF1_HUMAN;tr|E9PQN2|E9PQN2_HUMAN;tr|E9PKI6|E9PKI6_HUMAN;tr|E9PK09|E9PK09_HUMAN;tr|E9PJA7|E9PJA7_HUMAN;tr|H0YF14|H0YF14_HUMAN;tr|H0YF00|H0YF00_HUMAN	sp|Q9NYF8|BCLF1_HUMAN;tr|E9PQN2|E9PQN2_HUMAN;tr|E9PKI6|E9PKI6_HUMAN;tr|E9PK09|E9PK09_HUMAN	1.15582	1.12251	0.947886	0.960407	214290000	216220000	229690000	197510000	247680000	242710000	217720000	189690000	45;34;34;33;14;11;4	45;34;34;33;14;11;4	2;0;0;0;0;2;0	sp|Q9NYF8|BCLF1_HUMAN Bcl-2-associated transcription factor 1 OS=Homo sapiens GN=BCLAF1 PE=1 SV=2;tr|E9PQN2|E9PQN2_HUMAN Bcl-2-associated transcription factor 1 OS=Homo sapiens GN=BCLAF1 PE=1 SV=1;tr|E9PKI6|E9PKI6_HUMAN Bcl-2-associated transcription facto	7	45	45	2	24	25	30	28	33	31	31	29	24	25	30	28	33	31	31	29	0	1	2	1	2	2	1	2	41.3	41.3	3.3	106.12
sp|Q09028|RBBP4_HUMAN;tr|Q5JP02|Q5JP02_HUMAN;tr|H0YCT5|H0YCT5_HUMAN;tr|H0YDK2|H0YDK2_HUMAN;tr|H0YF10|H0YF10_HUMAN;tr|H0YEU5|H0YEU5_HUMAN;tr|E9PNS2|E9PNS2_HUMAN;tr|E9PIC4|E9PIC4_HUMAN;tr|E9PNS6|E9PNS6_HUMAN;tr|C9JAJ9|C9JAJ9_HUMAN;tr|Q5JNZ6|Q5JNZ6_HUMAN	sp|Q09028|RBBP4_HUMAN;tr|Q5JP02|Q5JP02_HUMAN;tr|H0YCT5|H0YCT5_HUMAN;tr|H0YDK2|H0YDK2_HUMAN;tr|H0YF10|H0YF10_HUMAN	1.77156	1.39516	0.781317	0.958105	2894800	2672100	4228500	3375100	5128300	3728000	3303800	3233700	7;4;4;4;4;3;2;2;2;1;1	7;4;4;4;4;3;2;2;2;1;1	1;0;0;0;0;0;1;1;1;0;0	sp|Q09028|RBBP4_HUMAN Histone-binding protein RBBP4 OS=Homo sapiens GN=RBBP4 PE=1 SV=3;tr|Q5JP02|Q5JP02_HUMAN Histone-binding protein RBBP7 (Fragment) OS=Homo sapiens GN=RBBP7 PE=1 SV=1;tr|H0YCT5|H0YCT5_HUMAN Histone-binding protein RBBP4 (Fragment) OS=Hom	11	7	7	1	2	2	4	4	3	5	4	3	2	2	4	4	3	5	4	3	1	1	1	1	1	1	1	1	12.7	12.7	3.3	47.655
sp|Q5JTH9|RRP12_HUMAN;tr|A0A087X1U8|A0A087X1U8_HUMAN;tr|H7C1M8|H7C1M8_HUMAN	sp|Q5JTH9|RRP12_HUMAN	1427600	1654000	1.04713	0.948887	1	1	1932900	2214700	1427600	1654000	2024000	2101500	10;1;1	10;1;1	10;1;1	sp|Q5JTH9|RRP12_HUMAN RRP12-like protein OS=Homo sapiens GN=RRP12 PE=1 SV=2	3	10	10	10	2	2	3	3	2	3	7	7	2	2	3	3	2	3	7	7	2	2	3	3	2	3	7	7	8	8	8	143.7
sp|Q15365|PCBP1_HUMAN;tr|J3QT27|J3QT27_HUMAN;sp|P57721|PCBP3_HUMAN;tr|E9PFP8|E9PFP8_HUMAN	sp|Q15365|PCBP1_HUMAN	0.501138	1.1999	0.823824	0.946116	3339800	2496700	2318700	2319800	1673700	2995800	1910200	2194800	4;1;1;1	4;1;1;1	3;0;0;0	sp|Q15365|PCBP1_HUMAN Poly(rC)-binding protein 1 OS=Homo sapiens GN=PCBP1 PE=1 SV=2	4	4	4	3	3	3	3	2	4	4	3	3	3	3	3	2	4	4	3	3	3	3	3	2	3	3	2	3	2.9	2.9	1.8	194.66
tr|F5H5D3|F5H5D3_HUMAN;sp|Q71U36|TBA1A_HUMAN;sp|Q9BQE3|TBA1C_HUMAN;sp|P68363|TBA1B_HUMAN;sp|Q13748|TBA3C_HUMAN;sp|Q6PEY2|TBA3E_HUMAN;sp|P68366|TBA4A_HUMAN;tr|F8VVB9|F8VVB9_HUMAN;tr|F8VWV9|F8VWV9_HUMAN;tr|F8VRZ4|F8VRZ4_HUMAN;tr|C9J2C0|C9J2C0_HUMAN;tr|F8VS66|F8VS66_HUMAN;tr|F8VX09|F8VX09_HUMAN;tr|F8VQQ4|F8VQQ4_HUMAN;sp|Q9NY65|TBA8_HUMAN;tr|F8VRK0|F8VRK0_HUMAN;tr|V9GZ17|V9GZ17_HUMAN;tr|F8VXZ7|F8VXZ7…	tr|F5H5D3|F5H5D3_HUMAN;sp|Q71U36|TBA1A_HUMAN;sp|Q9BQE3|TBA1C_HUMAN;sp|P68363|TBA1B_HUMAN;sp|Q13748|TBA3C_HUMAN;sp|Q6PEY2|TBA3E_HUMAN;sp|P68366|TBA4A_HUMAN;tr|F8VVB9|F8VVB9_HUMAN	0.822022	0.868591	1.16093	0.94608	2817200	2664200	2061800	1773000	2315800	2314100	2393600	1677400	7;7;7;7;6;5;4;4;3;3;3;3;3;3;3;2;2;1;1;1;1;1;1;1;1;1	7;7;7;7;6;5;4;4;3;3;3;3;3;3;3;2;2;1;1;1;1;1;1;1;1;1	7;7;7;7;6;5;4;4;3;3;3;3;3;3;3;2;2;1;1;1;1;1;1;1;1;1	tr|F5H5D3|F5H5D3_HUMAN Tubulin alpha-1C chain OS=Homo sapiens GN=TUBA1C PE=1 SV=1;sp|Q71U36|TBA1A_HUMAN Tubulin alpha-1A chain OS=Homo sapiens GN=TUBA1A PE=1 SV=1;sp|Q9BQE3|TBA1C_HUMAN Tubulin alpha-1C chain OS=Homo sapiens GN=TUBA1C PE=1 SV=1;sp|P68363|TB	26	7	7	7	2	2	3	5	4	4	3	4	2	2	3	5	4	4	3	4	2	2	3	5	4	4	3	4	13.8	13.8	13.8	80.247
tr|J3QLE5|J3QLE5_HUMAN;sp|P63162|RSMN_HUMAN;sp|P14678|RSMB_HUMAN;tr|A8MT02|A8MT02_HUMAN;tr|J3KRY3|J3KRY3_HUMAN;tr|S4R3P3|S4R3P3_HUMAN	tr|J3QLE5|J3QLE5_HUMAN;sp|P63162|RSMN_HUMAN;sp|P14678|RSMB_HUMAN;tr|A8MT02|A8MT02_HUMAN	5703100	5577000	0.808972	0.943094	1	1	7106300	4832500	5703100	5577000	5748800	4557500	4;4;4;4;1;1	4;4;4;4;1;1	4;4;4;4;1;1	tr|J3QLE5|J3QLE5_HUMAN Small nuclear ribonucleoprotein-associated protein N (Fragment) OS=Homo sapiens GN=SNRPN PE=4 SV=1;sp|P63162|RSMN_HUMAN Small nuclear ribonucleoprotein-associated protein N OS=Homo sapiens GN=SNRPN PE=1 SV=1;sp|P14678|RSMB_HUMAN Smal	6	4	4	4	1	1	2	2	3	2	3	4	1	1	2	2	3	2	3	4	1	1	2	2	3	2	3	4	21.9	21.9	21.9	17.546
sp|Q9HCK1|ZDBF2_HUMAN;tr|N0DVX5|N0DVX5_HUMAN	sp|Q9HCK1|ZDBF2_HUMAN;tr|N0DVX5|N0DVX5_HUMAN	1.282	6391100	0.950567	0.940751	4852200	1	4555700	4352800	6220500	6391100	4330500	4094900	14;13	14;13	14;13	sp|Q9HCK1|ZDBF2_HUMAN DBF4-type zinc finger-containing protein 2 OS=Homo sapiens GN=ZDBF2 PE=1 SV=3;tr|N0DVX5|N0DVX5_HUMAN DBF4-type zinc finger-containing protein 2 OS=Homo sapiens GN=ZDBF2 PE=1 SV=1	2	14	14	14	2	1	5	3	7	6	10	7	2	1	5	3	7	6	10	7	2	1	5	3	7	6	10	7	8.5	8.5	8.5	265.61
sp|O60306|AQR_HUMAN	sp|O60306|AQR_HUMAN	1767900	1090200	1033800	0.93979	1	1	1	1315400	1767900	1090200	1033800	1236200	5	5	5	sp|O60306|AQR_HUMAN Intron-binding protein aquarius OS=Homo sapiens GN=AQR PE=1 SV=4	1	5	5	5	1	0	1	4	4	3	3	4	1	0	1	4	4	3	3	4	1	0	1	4	4	3	3	4	4.3	4.3	4.3	171.29
sp|P08238|HS90B_HUMAN;sp|P07900|HS90A_HUMAN;tr|F8W026|F8W026_HUMAN;tr|Q96GW1|Q96GW1_HUMAN;sp|Q14568|HS902_HUMAN;sp|Q58FF8|H90B2_HUMAN;sp|P14625|ENPL_HUMAN	sp|P08238|HS90B_HUMAN;sp|P07900|HS90A_HUMAN	1	1	5.09632e-07	0.937944	1	1	1962200	2320500	1	1	1	2176500	5;3;1;1;1;1;1	5;3;1;1;1;1;1	5;3;1;1;1;1;1	sp|P08238|HS90B_HUMAN Heat shock protein HSP 90-beta OS=Homo sapiens GN=HSP90AB1 PE=1 SV=4;sp|P07900|HS90A_HUMAN Heat shock protein HSP 90-alpha OS=Homo sapiens GN=HSP90AA1 PE=1 SV=5	7	5	5	5	0	1	2	2	3	1	1	3	0	1	2	2	3	1	1	3	0	1	2	2	3	1	1	3	9.1	9.1	9.1	83.263
sp|P08670|VIME_HUMAN;tr|B0YJC4|B0YJC4_HUMAN;tr|B0YJC5|B0YJC5_HUMAN;tr|Q5JVS8|Q5JVS8_HUMAN;tr|H7C5W5|H7C5W5_HUMAN;sp|P41219|PERI_HUMAN;sp|P14136|GFAP_HUMAN;tr|K7EKH6|K7EKH6_HUMAN;tr|F8W835|F8W835_HUMAN;sp|P12036|NFH_HUMAN	sp|P08670|VIME_HUMAN;tr|B0YJC4|B0YJC4_HUMAN	1.12138	0.898667	1.00098	0.936758	293880000	312830000	245260000	249200000	329550000	281130000	245500000	233440000	43;40;18;12;4;4;2;1;1;1	40;37;18;12;2;2;1;1;1;1	37;34;17;12;2;2;1;1;1;0	sp|P08670|VIME_HUMAN Vimentin OS=Homo sapiens GN=VIM PE=1 SV=4;tr|B0YJC4|B0YJC4_HUMAN Vimentin OS=Homo sapiens GN=VIM PE=1 SV=1	10	43	40	37	36	31	34	33	34	35	37	37	34	30	31	30	32	32	34	34	31	27	28	27	29	29	31	32	75.5	72.1	67.4	53.651
sp|Q9UH99|SUN2_HUMAN;tr|B0QY60|B0QY60_HUMAN;tr|B0QY68|B0QY68_HUMAN;tr|B0QY66|B0QY66_HUMAN;tr|B0QY64|B0QY64_HUMAN;tr|B0QY67|B0QY67_HUMAN	sp|Q9UH99|SUN2_HUMAN	0.911994	1.04684	1.18832	0.929826	2908900	2587700	1740100	2408300	2652900	2708900	2067800	2239300	11;2;1;1;1;1	11;2;1;1;1;1	11;2;1;1;1;1	sp|Q9UH99|SUN2_HUMAN SUN domain-containing protein 2 OS=Homo sapiens GN=SUN2 PE=1 SV=3	6	11	11	11	2	2	2	3	6	6	5	6	2	2	2	3	6	6	5	6	2	2	2	3	6	6	5	6	20.1	20.1	20.1	80.31
sp|P62314|SMD1_HUMAN;tr|J3QLI9|J3QLI9_HUMAN;tr|J3QLR7|J3QLR7_HUMAN	sp|P62314|SMD1_HUMAN;tr|J3QLI9|J3QLI9_HUMAN	10933000	8192800	1.67562	0.919578	1	1	7126900	9998500	10933000	8192800	11942000	9194400	4;2;1	4;2;1	4;2;1	sp|P62314|SMD1_HUMAN Small nuclear ribonucleoprotein Sm D1 OS=Homo sapiens GN=SNRPD1 PE=1 SV=1;tr|J3QLI9|J3QLI9_HUMAN Small nuclear ribonucleoprotein Sm D1 OS=Homo sapiens GN=SNRPD1 PE=1 SV=1	3	4	4	4	1	1	2	2	4	4	4	4	1	1	2	2	4	4	4	4	1	1	2	2	4	4	4	4	37.8	37.8	37.8	13.281
sp|Q9Y265|RUVB1_HUMAN;tr|E7ETR0|E7ETR0_HUMAN;tr|H7C4G5|H7C4G5_HUMAN;tr|J3QLR1|J3QLR1_HUMAN;tr|H7C4I3|H7C4I3_HUMAN	sp|Q9Y265|RUVB1_HUMAN;tr|E7ETR0|E7ETR0_HUMAN	0.956689	0.905585	0.886157	0.912615	7030600	8448900	8162100	7461200	6726100	7651200	7232900	6809200	11;7;4;3;2	11;7;4;3;2	11;7;4;3;2	sp|Q9Y265|RUVB1_HUMAN RuvB-like 1 OS=Homo sapiens GN=RUVBL1 PE=1 SV=1;tr|E7ETR0|E7ETR0_HUMAN RuvB-like 1 OS=Homo sapiens GN=RUVBL1 PE=1 SV=1	5	11	11	11	8	6	8	6	10	10	7	7	8	6	8	6	10	10	7	7	8	6	8	6	10	10	7	7	34.6	34.6	34.6	50.227
tr|A0A0G2JM46|A0A0G2JM46_HUMAN;tr|A0A0G2JMJ3|A0A0G2JMJ3_HUMAN;sp|Q6ZW35|F231D_HUMAN;tr|Q7Z6E1|Q7Z6E1_HUMAN;tr|I3L1B9|I3L1B9_HUMAN;tr|D6RBV3|D6RBV3_HUMAN;tr|E9PKX0|E9PKX0_HUMAN;tr|Q8WYK7|Q8WYK7_HUMAN;sp|P0DMU3|F231L_HUMAN;tr|K4DI94|K4DI94_HUMAN;tr|A6NDI8|A6NDI8_HUMAN	tr|A0A0G2JM46|A0A0G2JM46_HUMAN;tr|A0A0G2JMJ3|A0A0G2JMJ3_HUMAN;sp|Q6ZW35|F231D_HUMAN;tr|Q7Z6E1|Q7Z6E1_HUMAN	0.912598	0.950172	0.876306	0.909682	13272000	12242000	11104000	10804000	12112000	11632000	9730500	9828200	15;15;15;14;4;1;1;1;1;1;1	15;15;15;14;4;1;1;1;1;1;1	12;12;12;11;3;1;0;0;0;0;0	tr|A0A0G2JM46|A0A0G2JM46_HUMAN Leukocyte immunoglobulin-like receptor subfamily B member 3 OS=Homo sapiens GN=LILRB3 PE=4 SV=1;tr|A0A0G2JMJ3|A0A0G2JMJ3_HUMAN Natural cytotoxicity triggering receptor 1 (Fragment) OS=Homo sapiens GN=NCR1 PE=4 SV=1;sp|Q6ZW35|	11	15	15	12	8	8	9	10	9	9	9	12	8	8	9	10	9	9	9	12	6	6	6	7	6	6	6	10	12	12	9.3	137.76
sp|Q4G0N7|F229B_HUMAN;tr|K7ELI0|K7ELI0_HUMAN	sp|Q4G0N7|F229B_HUMAN	1744700	1350100	0.805537	0.909073	1	1	1477400	1534200	1744700	1350100	1190100	1394700	11;2	8;1	8;1	sp|Q4G0N7|F229B_HUMAN Protein FAM229B OS=Homo sapiens GN=FAM229B PE=3 SV=1	2	11	8	8	2	2	6	5	8	6	7	7	0	0	3	2	5	3	4	5	0	0	3	2	5	3	4	5	18.5	13.7	13.7	76.348
sp|Q9Y657|SPIN1_HUMAN	sp|Q9Y657|SPIN1_HUMAN	1.02624	0.785189	0.922834	0.90727	42719000	40510000	36156000	25461000	43840000	31808000	33366000	23100000	12	12	9	sp|Q9Y657|SPIN1_HUMAN Spindlin-1 OS=Homo sapiens GN=SPIN1 PE=1 SV=3	1	12	12	9	7	6	12	11	10	9	7	8	7	6	12	11	10	9	7	8	6	5	9	8	7	7	6	6	58.8	58.8	45.4	29.6
sp|P07196|NFL_HUMAN;tr|A0A087X0W2|A0A087X0W2_HUMAN	sp|P07196|NFL_HUMAN;tr|A0A087X0W2|A0A087X0W2_HUMAN	1.05282	0.859513	0.760165	0.90512	1834700	1519000	1355100	1261600	1931600	1305600	1030100	1141900	9;5	7;5	7;5	sp|P07196|NFL_HUMAN Neurofilament light polypeptide OS=Homo sapiens GN=NEFL PE=1 SV=3;tr|A0A087X0W2|A0A087X0W2_HUMAN Neurofilament light polypeptide OS=Homo sapiens GN=NEFL PE=1 SV=1	2	9	7	7	4	5	6	4	6	6	7	3	2	3	4	3	4	4	5	3	2	3	4	3	4	4	5	3	17.1	14	14	61.516
tr|H3BU53|H3BU53_HUMAN	tr|H3BU53|H3BU53_HUMAN	2236900	2076900	0.777389	0.904988	1	1	2541200	2563900	2236900	2076900	1975500	2320300	22	3	3	tr|H3BU53|H3BU53_HUMAN MAX gene-associated protein (Fragment) OS=Homo sapiens GN=MGA PE=1 SV=1	1	22	3	3	11	15	15	16	15	17	17	17	1	1	2	2	3	2	2	2	1	1	2	2	3	2	2	2	22.6	3.3	3.3	127.14
sp|Q00839|HNRPU_HUMAN;tr|Q5RI18|Q5RI18_HUMAN	sp|Q00839|HNRPU_HUMAN	1.27965	1.25425	0.889112	0.898619	35619000	32637000	41339000	39899000	45580000	40935000	36755000	35854000	14;4	14;4	14;4	sp|Q00839|HNRPU_HUMAN Heterogeneous nuclear ribonucleoprotein U OS=Homo sapiens GN=HNRNPU PE=1 SV=6	2	14	14	14	8	11	10	12	10	11	11	12	8	11	10	12	10	11	11	12	8	11	10	12	10	11	11	12	20.4	20.4	20.4	90.583
sp|Q96A72|MGN2_HUMAN;tr|F5H6N1|F5H6N1_HUMAN;tr|F5H124|F5H124_HUMAN	sp|Q96A72|MGN2_HUMAN;tr|F5H6N1|F5H6N1_HUMAN	1.18609	1.21817	1.28764	0.897278	10237000	11413000	10854000	11497000	12142000	13903000	13976000	10316000	7;4;1	7;4;1	1;1;1	sp|Q96A72|MGN2_HUMAN Protein mago nashi homolog 2 OS=Homo sapiens GN=MAGOHB PE=1 SV=1;tr|F5H6N1|F5H6N1_HUMAN Protein mago nashi homolog 2 OS=Homo sapiens GN=MAGOHB PE=1 SV=1	3	7	7	1	6	6	6	7	5	4	4	3	6	6	6	7	5	4	4	3	0	1	1	1	1	1	0	0	43.2	43.2	6.1	17.276
sp|P26599|PTBP1_HUMAN;tr|G5EA29|G5EA29_HUMAN;tr|K7EKJ7|K7EKJ7_HUMAN;tr|K7ELW5|K7ELW5_HUMAN;tr|K7EK45|K7EK45_HUMAN;tr|K7ES59|K7ES59_HUMAN;tr|U3KQ54|U3KQ54_HUMAN;tr|A0A087WUW5|A0A087WUW5_HUMAN;tr|X6R242|X6R242_HUMAN;tr|A0A087WU68|A0A087WU68_HUMAN;sp|O95758|PTBP3_HUMAN	sp|P26599|PTBP1_HUMAN;tr|G5EA29|G5EA29_HUMAN;tr|K7EKJ7|K7EKJ7_HUMAN	1.07042	5390400	0.833547	0.892624	4619700	1	5306000	6941000	4945000	5390400	4422800	6195700	9;8;5;3;3;3;3;2;1;1;1	9;8;5;3;3;3;3;2;1;1;1	9;8;5;3;3;3;3;2;1;1;1	sp|P26599|PTBP1_HUMAN Polypyrimidine tract-binding protein 1 OS=Homo sapiens GN=PTBP1 PE=1 SV=1;tr|G5EA29|G5EA29_HUMAN Gem-associated protein 2 OS=Homo sapiens GN=GEMIN2 PE=1 SV=1;tr|K7EKJ7|K7EKJ7_HUMAN Polypyrimidine tract-binding protein 1 (Fragment) OS=	11	9	9	9	2	1	4	6	4	7	5	6	2	1	4	6	4	7	5	6	2	1	4	6	4	7	5	6	23.4	23.4	23.4	57.221
tr|D6RF44|D6RF44_HUMAN;tr|H0YA96|H0YA96_HUMAN;tr|D6RAF8|D6RAF8_HUMAN;tr|H0Y8G5|H0Y8G5_HUMAN;sp|Q14103|HNRPD_HUMAN	tr|D6RF44|D6RF44_HUMAN;tr|H0YA96|H0YA96_HUMAN;tr|D6RAF8|D6RAF8_HUMAN;tr|H0Y8G5|H0Y8G5_HUMAN;sp|Q14103|HNRPD_HUMAN	1	1391100	0.826571	0.891991	1	1	1402300	1851700	1	1391100	1159100	1651700	2;2;2;2;2	2;2;2;2;2	1;1;1;1;1	tr|D6RF44|D6RF44_HUMAN Heterogeneous nuclear ribonucleoprotein D0 (Fragment) OS=Homo sapiens GN=HNRNPD PE=1 SV=5;tr|H0YA96|H0YA96_HUMAN Heterogeneous nuclear ribonucleoprotein D0 (Fragment) OS=Homo sapiens GN=HNRNPD PE=1 SV=1;tr|D6RAF8|D6RAF8_HUMAN Heterog	5	2	2	1	1	1	2	2	1	2	2	2	1	1	2	2	1	2	2	2	0	1	1	1	1	1	1	1	19.6	19.6	12.5	12.64
sp|O00268|TAF4_HUMAN;tr|A0A0G2JRY5|A0A0G2JRY5_HUMAN;tr|V9GY14|V9GY14_HUMAN;tr|V9GY03|V9GY03_HUMAN;sp|Q92750|TAF4B_HUMAN;tr|A0A0A0MSA8|A0A0A0MSA8_HUMAN;tr|H7BY22|H7BY22_HUMAN	sp|O00268|TAF4_HUMAN;tr|A0A0G2JRY5|A0A0G2JRY5_HUMAN	0.896505	1.00194	0.867157	0.89035	141360000	133810000	134670000	139900000	126730000	134070000	116780000	124560000	34;23;6;4;1;1;1	34;23;6;4;1;1;1	34;23;6;4;1;1;1	sp|O00268|TAF4_HUMAN Transcription initiation factor TFIID subunit 4 OS=Homo sapiens GN=TAF4 PE=1 SV=2;tr|A0A0G2JRY5|A0A0G2JRY5_HUMAN Transcription initiation factor TFIID subunit 4 (Fragment) OS=Homo sapiens GN=TAF4 PE=4 SV=1	7	34	34	34	21	22	22	24	26	25	24	23	21	22	22	24	26	25	24	23	21	22	22	24	26	25	24	23	36.7	36.7	36.7	110.11
tr|F6VRR5|F6VRR5_HUMAN;sp|Q9BY77|PDIP3_HUMAN;tr|Q8WUT1|Q8WUT1_HUMAN;tr|F8WCX5|F8WCX5_HUMAN;tr|Q6R954|Q6R954_HUMAN;tr|F8WEE2|F8WEE2_HUMAN	tr|F6VRR5|F6VRR5_HUMAN;sp|Q9BY77|PDIP3_HUMAN;tr|Q8WUT1|Q8WUT1_HUMAN;tr|F8WCX5|F8WCX5_HUMAN	1200800	820310	1104400	0.884493	1	1	1	927300	1200800	820310	1104400	820190	4;4;3;3;1;1	4;4;3;3;1;1	4;4;3;3;1;1	tr|F6VRR5|F6VRR5_HUMAN Polymerase delta-interacting protein 3 OS=Homo sapiens GN=POLDIP3 PE=1 SV=1;sp|Q9BY77|PDIP3_HUMAN Polymerase delta-interacting protein 3 OS=Homo sapiens GN=POLDIP3 PE=1 SV=2;tr|Q8WUT1|Q8WUT1_HUMAN POLDIP3 protein OS=Homo sapiens GN=P	6	4	4	4	0	0	1	2	4	2	3	2	0	0	1	2	4	2	3	2	0	0	1	2	4	2	3	2	13.9	13.9	13.9	48.103
sp|Q2TAY7|SMU1_HUMAN	sp|Q2TAY7|SMU1_HUMAN	1382800	1056800	0.693106	0.884183	1	1	1531800	1877100	1382800	1056800	1061700	1659700	5	5	5	sp|Q2TAY7|SMU1_HUMAN WD40 repeat-containing protein SMU1 OS=Homo sapiens GN=SMU1 PE=1 SV=2	1	5	5	5	1	0	4	2	5	3	4	3	1	0	4	2	5	3	4	3	1	0	4	2	5	3	4	3	11.5	11.5	11.5	57.543
sp|Q96DI7|SNR40_HUMAN;tr|Q9NSS8|Q9NSS8_HUMAN	sp|Q96DI7|SNR40_HUMAN	3481200	2558800	0.93937	0.879439	1	1	2774200	2458500	3481200	2558800	2606000	2162100	5;2	5;2	5;2	sp|Q96DI7|SNR40_HUMAN U5 small nuclear ribonucleoprotein 40 kDa protein OS=Homo sapiens GN=SNRNP40 PE=1 SV=1	2	5	5	5	1	1	3	2	3	3	4	3	1	1	3	2	3	3	4	3	1	1	3	2	3	3	4	3	16.5	16.5	16.5	39.31
sp|P04637|P53_HUMAN;tr|E7EQX7|E7EQX7_HUMAN;tr|J3KP33|J3KP33_HUMAN;tr|A0A087WZU8|A0A087WZU8_HUMAN;tr|A0A087X1Q1|A0A087X1Q1_HUMAN;tr|E9PCY9|E9PCY9_HUMAN;tr|S4R334|S4R334_HUMAN;tr|E9PFT5|E9PFT5_HUMAN;tr|E7EMR6|E7EMR6_HUMAN;tr|A0A087WXZ1|A0A087WXZ1_HUMAN;tr|A0A087WT22|A0A087WT22_HUMAN;tr|E7ESS1|E7ESS1_HUMAN	sp|P04637|P53_HUMAN;tr|E7EQX7|E7EQX7_HUMAN;tr|J3KP33|J3KP33_HUMAN;tr|A0A087WZU8|A0A087WZU8_HUMAN;tr|A0A087X1Q1|A0A087X1Q1_HUMAN	2646400	2062900	1977700	0.878791	1	1	1	1777100	2646400	2062900	1977700	1561700	5;4;4;4;3;2;2;2;2;2;2;2	5;4;4;4;3;2;2;2;2;2;2;2	5;4;4;4;3;2;2;2;2;2;2;2	sp|P04637|P53_HUMAN Cellular tumor antigen p53 OS=Homo sapiens GN=TP53 PE=1 SV=4;tr|E7EQX7|E7EQX7_HUMAN Cellular tumor antigen p53 OS=Homo sapiens GN=TP53 PE=1 SV=1;tr|J3KP33|J3KP33_HUMAN Cellular tumor antigen p53 OS=Homo sapiens GN=TP53 PE=1 SV=1;tr|A0A0	12	5	5	5	1	1	1	2	3	4	3	4	1	1	1	2	3	4	3	4	1	1	1	2	3	4	3	4	11.5	11.5	11.5	43.653
tr|A0A087WX29|A0A087WX29_HUMAN;sp|Q13148|TADBP_HUMAN;tr|E7EPY2|E7EPY2_HUMAN;tr|A0A087WYY0|A0A087WYY0_HUMAN;tr|A0A087X260|A0A087X260_HUMAN;tr|B1AKP7|B1AKP7_HUMAN;tr|A0A087WV68|A0A087WV68_HUMAN;tr|A0A087WXQ5|A0A087WXQ5_HUMAN;tr|K7EJM5|K7EJM5_HUMAN;tr|A0A087WYE7|A0A087WYE7_HUMAN;tr|A0A087WTZ4|A0A087WTZ4_HUMAN;tr|K7EN94|K7EN94_HUMAN;tr|A0A087WXV3|A0A087WXV3_HUMAN;tr|A0A087WX67|A0A087WX67_HUMAN;tr|A0A…	tr|A0A087WX29|A0A087WX29_HUMAN;sp|Q13148|TADBP_HUMAN;tr|E7EPY2|E7EPY2_HUMAN;tr|A0A087WYY0|A0A087WYY0_HUMAN;tr|A0A087X260|A0A087X260_HUMAN;tr|B1AKP7|B1AKP7_HUMAN;tr|A0A087WV68|A0A087WV68_HUMAN;tr|A0A087WXQ5|A0A087WXQ5_HUMAN	1878700	1518800	0.905741	0.878089	1	1	1886300	1982600	1878700	1518800	1708500	1740900	3;3;2;2;2;2;2;2;1;1;1;1;1;1;1;1;1	3;3;2;2;2;2;2;2;1;1;1;1;1;1;1;1;1	3;3;2;2;2;2;2;2;1;1;1;1;1;1;1;1;1	tr|A0A087WX29|A0A087WX29_HUMAN TAR DNA-binding protein 43 (Fragment) OS=Homo sapiens GN=TARDBP PE=1 SV=1;sp|Q13148|TADBP_HUMAN TAR DNA-binding protein 43 OS=Homo sapiens GN=TARDBP PE=1 SV=1;tr|E7EPY2|E7EPY2_HUMAN MDS1 and EVI1 complex locus protein EVI1 (F	17	3	3	3	0	0	2	2	3	2	3	3	0	0	2	2	3	2	3	3	0	0	2	2	3	2	3	3	17.3	17.3	17.3	26.743
sp|P11142|HSP7C_HUMAN;tr|E9PKE3|E9PKE3_HUMAN;tr|E9PN89|E9PN89_HUMAN;tr|E9PLF4|E9PLF4_HUMAN;tr|E9PNE6|E9PNE6_HUMAN;tr|E9PQQ4|E9PQQ4_HUMAN;tr|E9PQK7|E9PQK7_HUMAN;tr|E9PK54|E9PK54_HUMAN;tr|E9PI65|E9PI65_HUMAN;sp|P54652|HSP72_HUMAN;tr|A8K7Q2|A8K7Q2_HUMAN;tr|E9PPY6|E9PPY6_HUMAN;tr|E9PN25|E9PN25_HUMAN;tr|E9PM13|E9PM13_HUMAN;tr|E9PS65|E9PS65_HUMAN	sp|P11142|HSP7C_HUMAN;tr|E9PKE3|E9PKE3_HUMAN;tr|E9PN89|E9PN89_HUMAN;tr|E9PLF4|E9PLF4_HUMAN;tr|E9PNE6|E9PNE6_HUMAN	0.85533	0.842569	0.822602	0.876696	25368000	22251000	22210000	25433000	21698000	18748000	18270000	22297000	20;19;15;10;10;9;9;9;8;8;8;7;5;2;2	19;18;15;9;9;8;8;8;7;7;8;6;4;2;2	17;16;13;8;8;8;8;8;6;5;7;6;4;2;2	sp|P11142|HSP7C_HUMAN Heat shock cognate 71 kDa protein OS=Homo sapiens GN=HSPA8 PE=1 SV=1;tr|E9PKE3|E9PKE3_HUMAN Heat shock cognate 71 kDa protein OS=Homo sapiens GN=HSPA8 PE=1 SV=1;tr|E9PN89|E9PN89_HUMAN Heat shock cognate 71 kDa protein (Fragment) OS=Ho	15	20	19	17	12	11	13	17	13	12	12	13	11	10	12	16	13	11	11	12	9	8	11	14	12	10	9	11	34.8	32.8	31.4	70.897
sp|P49756|RBM25_HUMAN;tr|H0YE46|H0YE46_HUMAN;tr|E9PQU5|E9PQU5_HUMAN	sp|P49756|RBM25_HUMAN	2654000	0.829226	0.951525	0.866476	1	2560700	2809700	2690900	2654000	2123400	2673500	2331600	6;1;1	6;1;1	6;1;1	sp|P49756|RBM25_HUMAN RNA-binding protein 25 OS=Homo sapiens GN=RBM25 PE=1 SV=3	3	6	6	6	1	2	4	3	5	2	4	3	1	2	4	3	5	2	4	3	1	2	4	3	5	2	4	3	7.5	7.5	7.5	100.18
tr|Q5JY65|Q5JY65_HUMAN;sp|Q9BZJ0|CRNL1_HUMAN	tr|Q5JY65|Q5JY65_HUMAN;sp|Q9BZJ0|CRNL1_HUMAN	1849600	822820	0.628234	0.863344	1	1	1223700	1679400	1849600	822820	768770	1449900	6;6	6;6	6;6	tr|Q5JY65|Q5JY65_HUMAN Crooked neck-like protein 1 OS=Homo sapiens GN=CRNKL1 PE=1 SV=1;sp|Q9BZJ0|CRNL1_HUMAN Crooked neck-like protein 1 OS=Homo sapiens GN=CRNKL1 PE=1 SV=4	2	6	6	6	0	0	2	4	3	2	3	5	0	0	2	4	3	2	3	5	0	0	2	4	3	2	3	5	8.1	8.1	8.1	99.172
sp|Q5UIP0|RIF1_HUMAN;tr|H7C2B5|H7C2B5_HUMAN;tr|H7BZN3|H7BZN3_HUMAN	sp|Q5UIP0|RIF1_HUMAN	1.47483	1.16313	1.06804	0.863303	15751000	20008000	18107000	19086000	23230000	23272000	19339000	16477000	34;12;10	34;12;10	34;12;10	sp|Q5UIP0|RIF1_HUMAN Telomere-associated protein RIF1 OS=Homo sapiens GN=RIF1 PE=1 SV=2	3	34	34	34	7	9	16	16	21	20	24	20	7	9	16	16	21	20	24	20	7	9	16	16	21	20	24	20	20.3	20.3	20.3	274.46
sp|O43290|SNUT1_HUMAN;tr|E9PQI8|E9PQI8_HUMAN	sp|O43290|SNUT1_HUMAN	1886400	1389200	2593600	0.863178	1	1	1	1685400	1886400	1389200	2593600	1454800	8;1	8;1	8;1	sp|O43290|SNUT1_HUMAN U4/U6.U5 tri-snRNP-associated protein 1 OS=Homo sapiens GN=SART1 PE=1 SV=1	2	8	8	8	1	0	1	3	6	2	3	3	1	0	1	3	6	2	3	3	1	0	1	3	6	2	3	3	13.9	13.9	13.9	90.254
sp|P11021|GRP78_HUMAN	sp|P11021|GRP78_HUMAN	3318100	3057700	0.715191	0.854398	1	1	3694400	3216300	3318100	3057700	2642200	2748000	13	12	12	sp|P11021|GRP78_HUMAN 78 kDa glucose-regulated protein OS=Homo sapiens GN=HSPA5 PE=1 SV=2	1	13	12	12	1	2	8	7	7	6	12	7	0	1	7	6	6	5	11	6	0	1	7	6	6	5	11	6	13.1	13.1	13.1	139.63
sp|P84090|ERH_HUMAN;tr|G3V279|G3V279_HUMAN	sp|P84090|ERH_HUMAN;tr|G3V279|G3V279_HUMAN	0.597338	1.12004	1.06946	0.842144	395990000	377450000	304780000	298500000	236540000	422760000	325950000	251380000	7;4	7;4	7;4	sp|P84090|ERH_HUMAN Enhancer of rudimentary homolog OS=Homo sapiens GN=ERH PE=1 SV=1;tr|G3V279|G3V279_HUMAN Enhancer of rudimentary homolog OS=Homo sapiens GN=ERH PE=1 SV=1	2	7	7	7	6	6	6	7	7	6	7	7	6	6	6	7	7	6	7	7	6	6	6	7	7	6	7	7	56.7	56.7	56.7	12.259
sp|O75533|SF3B1_HUMAN;tr|H7C341|H7C341_HUMAN	sp|O75533|SF3B1_HUMAN	1.09944	0.991046	0.67755	0.837497	13566000	14631000	18223000	14449000	14915000	14500000	12347000	12101000	28;2	28;2	28;2	sp|O75533|SF3B1_HUMAN Splicing factor 3B subunit 1 OS=Homo sapiens GN=SF3B1 PE=1 SV=3	2	28	28	28	9	10	16	19	13	16	22	19	9	10	16	19	13	16	22	19	9	10	16	19	13	16	22	19	26.4	26.4	26.4	145.83
sp|P52907|CAZA1_HUMAN;tr|A0A0D9SET8|A0A0D9SET8_HUMAN	sp|P52907|CAZA1_HUMAN	9026700	7310000	1.69031	0.826356	1	1	3829900	5479600	9026700	7310000	6473700	4528100	8;1	8;1	6;0	sp|P52907|CAZA1_HUMAN F-actin-capping protein subunit alpha-1 OS=Homo sapiens GN=CAPZA1 PE=1 SV=3	2	8	8	6	1	0	3	3	6	6	7	4	1	0	3	3	6	6	7	4	1	0	2	2	5	4	5	3	45.5	45.5	36	32.922
sp|Q8TDF6|GRP4_HUMAN;tr|F8W7Y5|F8W7Y5_HUMAN;tr|H3BTW2|H3BTW2_HUMAN;tr|A0A0A0MS18|A0A0A0MS18_HUMAN	sp|Q8TDF6|GRP4_HUMAN	1.05204	2357700	0.763101	0.822144	2653500	1	2786000	2606600	2791600	2357700	2126000	2143000	8;1;1;1	8;1;1;1	8;1;1;1	sp|Q8TDF6|GRP4_HUMAN RAS guanyl-releasing protein 4 OS=Homo sapiens GN=RASGRP4 PE=1 SV=2	4	8	8	8	2	1	4	6	5	4	6	8	2	1	4	6	5	4	6	8	2	1	4	6	5	4	6	8	7.7	7.7	7.7	155.82
tr|E7ESY4|E7ESY4_HUMAN;sp|Q13330|MTA1_HUMAN;tr|H0Y4T7|H0Y4T7_HUMAN;tr|F8VSM3|F8VSM3_HUMAN;tr|F8W9Y9|F8W9Y9_HUMAN;tr|E9PCS8|E9PCS8_HUMAN;tr|E7EQY4|E7EQY4_HUMAN;tr|E7EV10|E7EV10_HUMAN;sp|Q9BTC8|MTA3_HUMAN;tr|H7C3F3|H7C3F3_HUMAN;tr|H0YIT0|H0YIT0_HUMAN;tr|E9PF88|E9PF88_HUMAN	tr|E7ESY4|E7ESY4_HUMAN;sp|Q13330|MTA1_HUMAN;tr|H0Y4T7|H0Y4T7_HUMAN	3341500	3606000	0.948073	0.817561	1	1	2644100	3310700	3341500	3606000	2506800	2706700	9;9;6;3;3;2;2;2;2;1;1;1	9;9;6;3;3;2;2;2;2;1;1;1	8;8;5;2;3;1;1;1;1;1;1;1	tr|E7ESY4|E7ESY4_HUMAN Metastasis-associated protein MTA1 OS=Homo sapiens GN=MTA1 PE=1 SV=1;sp|Q13330|MTA1_HUMAN Metastasis-associated protein MTA1 OS=Homo sapiens GN=MTA1 PE=1 SV=2;tr|H0Y4T7|H0Y4T7_HUMAN Metastasis-associated protein MTA1 (Fragment) OS=Ho	12	9	9	8	1	0	3	5	6	5	7	4	1	0	3	5	6	5	7	4	0	0	2	4	5	4	6	3	16.1	16.1	14.7	79.372
sp|P08621|RU17_HUMAN;tr|M0QYR1|M0QYR1_HUMAN;tr|M0QX04|M0QX04_HUMAN	sp|P08621|RU17_HUMAN;tr|M0QYR1|M0QYR1_HUMAN	1.4673	8065000	1.14553	0.815037	6630200	1	7881100	9317000	9728500	8065000	9028000	7593700	9;6;1	9;6;1	9;6;1	sp|P08621|RU17_HUMAN U1 small nuclear ribonucleoprotein 70 kDa OS=Homo sapiens GN=SNRNP70 PE=1 SV=2;tr|M0QYR1|M0QYR1_HUMAN U1 small nuclear ribonucleoprotein 70 kDa (Fragment) OS=Homo sapiens GN=SNRNP70 PE=1 SV=1	3	9	9	9	4	2	7	7	8	7	8	7	4	2	7	7	8	7	8	7	4	2	7	7	8	7	8	7	22.4	22.4	22.4	51.556
sp|Q9Y5S9|RBM8A_HUMAN;tr|B4DTX8|B4DTX8_HUMAN;tr|H3BU74|H3BU74_HUMAN;tr|A0A087X0Z4|A0A087X0Z4_HUMAN;sp|Q6ZNA4|RN111_HUMAN;sp|O94763|RMP_HUMAN	sp|Q9Y5S9|RBM8A_HUMAN	1.1911	0.967192	0.957687	0.811853	6902700	7924800	7706900	6670300	8221800	7664800	7380800	5415300	8;2;2;2;2;1	8;2;2;2;2;1	8;2;2;2;2;1	sp|Q9Y5S9|RBM8A_HUMAN RNA-binding protein 8A OS=Homo sapiens GN=RBM8A PE=1 SV=1	6	8	8	8	4	5	5	5	8	7	5	5	4	5	5	5	8	7	5	5	4	5	5	5	8	7	5	5	3.6	3.6	3.6	279.28
tr|E9PKG1|E9PKG1_HUMAN;sp|Q99873|ANM1_HUMAN;tr|H7C2I1|H7C2I1_HUMAN;tr|E9PQ98|E9PQ98_HUMAN;tr|E9PIX6|E9PIX6_HUMAN;tr|E9PNR9|E9PNR9_HUMAN;tr|H0YDE4|H0YDE4_HUMAN;tr|A0A087X1W2|A0A087X1W2_HUMAN;sp|Q9NR22|ANM8_HUMAN;tr|E9PMZ2|E9PMZ2_HUMAN;tr|E9PMW9|E9PMW9_HUMAN;tr|E9PI83|E9PI83_HUMAN	tr|E9PKG1|E9PKG1_HUMAN;sp|Q99873|ANM1_HUMAN;tr|H7C2I1|H7C2I1_HUMAN;tr|E9PQ98|E9PQ98_HUMAN;tr|E9PIX6|E9PIX6_HUMAN;tr|E9PNR9|E9PNR9_HUMAN;tr|H0YDE4|H0YDE4_HUMAN;tr|A0A087X1W2|A0A087X1W2_HUMAN	1.71124	0.890615	0.884221	0.81185	17471000	28395000	24996000	27866000	29897000	25289000	22102000	22623000	13;13;13;9;9;8;8;8;3;1;1;1	13;13;13;9;9;8;8;8;3;1;1;1	13;13;13;9;9;8;8;8;3;1;1;1	tr|E9PKG1|E9PKG1_HUMAN Protein arginine N-methyltransferase 1 OS=Homo sapiens GN=PRMT1 PE=1 SV=1;sp|Q99873|ANM1_HUMAN Protein arginine N-methyltransferase 1 OS=Homo sapiens GN=PRMT1 PE=1 SV=2;tr|H7C2I1|H7C2I1_HUMAN Protein arginine N-methyltransferase 1 OS	12	13	13	13	8	7	8	9	12	10	9	10	8	7	8	9	12	10	9	10	8	7	8	9	12	10	9	10	38.5	38.5	38.5	37.709
sp|Q15208|STK38_HUMAN	sp|Q15208|STK38_HUMAN	0.924356	0.860452	0.883345	0.810481	45331000	49732000	48699000	46312000	41902000	42792000	43018000	37535000	17	17	15	sp|Q15208|STK38_HUMAN Serine/threonine-protein kinase 38 OS=Homo sapiens GN=STK38 PE=1 SV=1	1	17	17	15	10	10	12	12	15	12	12	12	10	10	12	12	15	12	12	12	9	9	11	11	13	11	10	11	44.7	44.7	41.5	54.19
sp|P62158|CALM_HUMAN;tr|H0Y7A7|H0Y7A7_HUMAN;tr|F8WBR5|F8WBR5_HUMAN;tr|M0QZ52|M0QZ52_HUMAN;tr|G3V479|G3V479_HUMAN;tr|E7ETZ0|E7ETZ0_HUMAN;tr|E7EMB3|E7EMB3_HUMAN;tr|Q96HY3|Q96HY3_HUMAN;tr|G3V361|G3V361_HUMAN	sp|P62158|CALM_HUMAN;tr|H0Y7A7|H0Y7A7_HUMAN;tr|F8WBR5|F8WBR5_HUMAN;tr|M0QZ52|M0QZ52_HUMAN;tr|G3V479|G3V479_HUMAN;tr|E7ETZ0|E7ETZ0_HUMAN;tr|E7EMB3|E7EMB3_HUMAN	1	1757300	1	0.809835	1	1	1	1885200	1	1757300	1	1526700	3;3;2;2;2;2;2;1;1	3;3;2;2;2;2;2;1;1	3;3;2;2;2;2;2;1;1	sp|P62158|CALM_HUMAN Calmodulin OS=Homo sapiens GN=CALM1 PE=1 SV=2;tr|H0Y7A7|H0Y7A7_HUMAN Calmodulin (Fragment) OS=Homo sapiens GN=CALM2 PE=1 SV=1;tr|F8WBR5|F8WBR5_HUMAN Calmodulin OS=Homo sapiens GN=CALM2 PE=1 SV=1;tr|M0QZ52|M0QZ52_HUMAN Calmodulin OS=Hom	9	3	3	3	1	1	1	2	1	2	1	3	1	1	1	2	1	2	1	3	1	1	1	2	1	2	1	3	30.9	30.9	30.9	16.837
sp|Q8N0Y7|PGAM4_HUMAN;tr|Q53RS6|Q53RS6_HUMAN	sp|Q8N0Y7|PGAM4_HUMAN	7167000	1.39017	0.891456	0.808556	1	3807100	5635500	6241500	7167000	5292500	5023800	5046600	12;3	12;3	12;3	sp|Q8N0Y7|PGAM4_HUMAN Probable phosphoglycerate mutase 4 OS=Homo sapiens GN=PGAM4 PE=3 SV=1	2	12	12	12	1	2	4	6	9	6	9	6	1	2	4	6	9	6	9	6	1	2	4	6	9	6	9	6	17.5	17.5	17.5	71.225
sp|Q14974|IMB1_HUMAN;tr|J3QR48|J3QR48_HUMAN;tr|J3KTM9|J3KTM9_HUMAN;tr|J3QKQ5|J3QKQ5_HUMAN	sp|Q14974|IMB1_HUMAN;tr|J3QR48|J3QR48_HUMAN;tr|J3KTM9|J3KTM9_HUMAN	0.956982	0.970291	0.655684	0.808021	1699300	2144100	1881700	1730400	1626200	2080400	1233800	1398200	6;3;3;1	6;3;3;1	6;3;3;1	sp|Q14974|IMB1_HUMAN Importin subunit beta-1 OS=Homo sapiens GN=KPNB1 PE=1 SV=2;tr|J3QR48|J3QR48_HUMAN Importin subunit beta-1 (Fragment) OS=Homo sapiens GN=KPNB1 PE=1 SV=5;tr|J3KTM9|J3KTM9_HUMAN Importin subunit beta-1 (Fragment) OS=Homo sapiens GN=KPNB1	4	6	6	6	2	2	2	4	5	2	3	3	2	2	2	4	5	2	3	3	2	2	2	4	5	2	3	3	7.8	7.8	7.8	97.169
sp|Q5BKZ1|ZN326_HUMAN;tr|A0A0A0MRN4|A0A0A0MRN4_HUMAN	sp|Q5BKZ1|ZN326_HUMAN	1.0842	2463500	1.1651	0.805244	2138900	1	1829800	2139600	2319000	2463500	2131900	1722900	6;1	6;1	6;1	sp|Q5BKZ1|ZN326_HUMAN DBIRD complex subunit ZNF326 OS=Homo sapiens GN=ZNF326 PE=1 SV=2	2	6	6	6	2	1	3	2	3	3	3	3	2	1	3	2	3	3	3	3	2	1	3	2	3	3	3	3	13.6	13.6	13.6	65.653
CON__P12763	CON__P12763	1.20047	0.893139	0.792201	0.798552	10745000	10713000	11578000	13264000	12899000	9568200	9172100	10592000	4	4	4		1	4	4	4	3	2	3	3	3	4	4	2	3	2	3	3	3	4	4	2	3	2	3	3	3	4	4	2	15.9	15.9	15.9	38.418
sp|P23588|IF4B_HUMAN;tr|E7EX17|E7EX17_HUMAN;tr|F8VX11|F8VX11_HUMAN;tr|F8VP89|F8VP89_HUMAN;tr|F8VSC7|F8VSC7_HUMAN;tr|F8W0K0|F8W0K0_HUMAN;tr|F8VYE9|F8VYE9_HUMAN;tr|F8VRU1|F8VRU1_HUMAN;REV__tr|F8VX11|F8VX11_HUMAN;REV__sp|P23588|IF4B_HUMAN;REV__tr|E7EX17|E7EX17_HUMAN	sp|P23588|IF4B_HUMAN;tr|E7EX17|E7EX17_HUMAN	0.94779	0.951572	0.84542	0.793029	183680000	210210000	179130000	162100000	174090000	200030000	151440000	128550000	33;33;15;13;10;9;4;2;2;2;2	33;33;15;13;10;9;4;2;2;2;2	33;33;15;13;10;9;4;2;2;2;2	sp|P23588|IF4B_HUMAN Eukaryotic translation initiation factor 4B OS=Homo sapiens GN=EIF4B PE=1 SV=2;tr|E7EX17|E7EX17_HUMAN Eukaryotic translation initiation factor 4B OS=Homo sapiens GN=EIF4B PE=1 SV=1	11	33	33	33	19	20	22	23	21	22	23	30	19	20	22	23	21	22	23	30	19	20	22	23	21	22	23	30	45.7	45.7	45.7	69.15
sp|Q9BUQ8|DDX23_HUMAN;tr|H0YI52|H0YI52_HUMAN;tr|F8VVA2|F8VVA2_HUMAN	sp|Q9BUQ8|DDX23_HUMAN	1732300	1121800	0.778451	0.79154	1	1	1502600	1714000	1732300	1121800	1169700	1356700	7;1;1	7;1;1	7;1;1	sp|Q9BUQ8|DDX23_HUMAN Probable ATP-dependent RNA helicase DDX23 OS=Homo sapiens GN=DDX23 PE=1 SV=3	3	7	7	7	0	0	4	2	4	2	4	4	0	0	4	2	4	2	4	4	0	0	4	2	4	2	4	4	8.5	8.5	8.5	95.581
sp|Q9UKD2|MRT4_HUMAN	sp|Q9UKD2|MRT4_HUMAN	0.568317	0.588077	0.801536	0.790383	2208100000	2449000000	2083000000	1742700000	1254900000	1440200000	1669600000	1377400000	21	21	21	sp|Q9UKD2|MRT4_HUMAN mRNA turnover protein 4 homolog OS=Homo sapiens GN=MRTO4 PE=1 SV=2	1	21	21	21	19	17	17	19	20	20	20	19	19	17	17	19	20	20	20	19	19	17	17	19	20	20	20	19	65.7	65.7	65.7	27.56
sp|O15042|SR140_HUMAN;tr|E7ET15|E7ET15_HUMAN;tr|H7C4V2|H7C4V2_HUMAN;tr|E7EW00|E7EW00_HUMAN;tr|H0Y8D9|H0Y8D9_HUMAN	sp|O15042|SR140_HUMAN;tr|E7ET15|E7ET15_HUMAN	0.815769	0.961971	1.00761	0.788464	6130900	5198700	5228800	5496000	5001400	5001000	5268600	4333400	12;11;4;2;2	12;11;4;2;2	12;11;4;2;2	sp|O15042|SR140_HUMAN U2 snRNP-associated SURP motif-containing protein OS=Homo sapiens GN=U2SURP PE=1 SV=2;tr|E7ET15|E7ET15_HUMAN U2 snRNP-associated SURP motif-containing protein OS=Homo sapiens GN=U2SURP PE=1 SV=1	5	12	12	12	3	3	6	8	9	5	9	5	3	3	6	8	9	5	9	5	3	3	6	8	9	5	9	5	13.7	13.7	13.7	118.29
sp|Q5VTE0|EF1A3_HUMAN;sp|P68104|EF1A1_HUMAN;tr|A0A087WV01|A0A087WV01_HUMAN;tr|A0A087WVQ9|A0A087WVQ9_HUMAN;sp|Q05639|EF1A2_HUMAN;tr|A6PW80|A6PW80_HUMAN;tr|Q5JR01|Q5JR01_HUMAN	sp|Q5VTE0|EF1A3_HUMAN;sp|P68104|EF1A1_HUMAN;tr|A0A087WV01|A0A087WV01_HUMAN;tr|A0A087WVQ9|A0A087WVQ9_HUMAN;sp|Q05639|EF1A2_HUMAN	1.01377	1.11218	0.832848	0.784845	11038000	7345600	9480600	9455500	11190000	8169600	7895900	7421100	5;5;4;4;4;2;2	5;5;4;4;4;2;2	5;5;4;4;4;2;2	sp|Q5VTE0|EF1A3_HUMAN Putative elongation factor 1-alpha-like 3 OS=Homo sapiens GN=EEF1A1P5 PE=5 SV=1;sp|P68104|EF1A1_HUMAN Elongation factor 1-alpha 1 OS=Homo sapiens GN=EEF1A1 PE=1 SV=1;tr|A0A087WV01|A0A087WV01_HUMAN Elongation factor 1-alpha OS=Homo sap	7	5	5	5	5	4	5	5	5	4	5	5	5	4	5	5	5	4	5	5	5	4	5	5	5	4	5	5	11.5	11.5	11.5	50.184
sp|Q9Y2H1|ST38L_HUMAN;tr|F5H277|F5H277_HUMAN;tr|F5GY51|F5GY51_HUMAN;tr|F5H7Z3|F5H7Z3_HUMAN;tr|I3L0D0|I3L0D0_HUMAN;tr|F5H5E6|F5H5E6_HUMAN;tr|F5H0V1|F5H0V1_HUMAN;tr|H0YGN4|H0YGN4_HUMAN	sp|Q9Y2H1|ST38L_HUMAN	0.893966	0.862164	1.02732	0.782204	16174000	13770000	13248000	15037000	14459000	11872000	13610000	11762000	17;7;7;6;5;2;2;1	15;6;6;5;4;2;2;1	15;6;6;5;4;2;2;1	sp|Q9Y2H1|ST38L_HUMAN Serine/threonine-protein kinase 38-like OS=Homo sapiens GN=STK38L PE=1 SV=3	8	17	15	15	6	4	11	8	12	12	15	10	5	3	10	7	10	11	13	9	5	3	10	7	10	11	13	9	37.5	36	36	54.002
tr|F8W0Q9|F8W0Q9_HUMAN	tr|F8W0Q9|F8W0Q9_HUMAN	0.740077	0.858562	0.845383	0.773049	8724500	7148700	8563100	6774600	6456800	6137600	7239100	5237100	10	10	2	tr|F8W0Q9|F8W0Q9_HUMAN Periphilin-1 OS=Homo sapiens GN=PPHLN1 PE=1 SV=1	1	10	10	2	5	3	8	7	7	6	5	5	5	3	8	7	7	6	5	5	0	0	1	1	2	1	1	1	27.5	27.5	6.8	44.682
sp|P84103|SRSF3_HUMAN;tr|A0A087X2D0|A0A087X2D0_HUMAN	sp|P84103|SRSF3_HUMAN;tr|A0A087X2D0|A0A087X2D0_HUMAN	1	1	2114900	0.771786	1	1	1	2459100	1	1	2114900	1897900	5;4	4;3	4;3	sp|P84103|SRSF3_HUMAN Serine/arginine-rich splicing factor 3 OS=Homo sapiens GN=SRSF3 PE=1 SV=1;tr|A0A087X2D0|A0A087X2D0_HUMAN Serine/arginine-rich-splicing factor 3 OS=Homo sapiens GN=SRSF3 PE=1 SV=1	2	5	4	4	2	3	2	3	3	3	3	3	1	2	1	2	2	2	2	3	1	2	1	2	2	2	2	3	31.1	31.1	31.1	19.329
tr|B4E3S0|B4E3S0_HUMAN;sp|Q9ULV4|COR1C_HUMAN;tr|F8VV53|F8VV53_HUMAN;tr|F8W1H8|F8W1H8_HUMAN;tr|F8VUX3|F8VUX3_HUMAN;tr|F8VSA4|F8VSA4_HUMAN;tr|F8VRE9|F8VRE9_HUMAN;tr|H0YHL7|H0YHL7_HUMAN;tr|F8VTT6|F8VTT6_HUMAN;tr|F8VVB7|F8VVB7_HUMAN	tr|B4E3S0|B4E3S0_HUMAN;sp|Q9ULV4|COR1C_HUMAN	1328000	1279900	6.33192e-07	0.769673	1	1	1579300	1634200	1328000	1279900	1	1257800	4;4;1;1;1;1;1;1;1;1	4;4;1;1;1;1;1;1;1;1	4;4;1;1;1;1;1;1;1;1	tr|B4E3S0|B4E3S0_HUMAN Coronin OS=Homo sapiens GN=CORO1C PE=1 SV=1;sp|Q9ULV4|COR1C_HUMAN Coronin-1C OS=Homo sapiens GN=CORO1C PE=1 SV=1	10	4	4	4	0	0	2	3	3	4	1	4	0	0	2	3	3	4	1	4	0	0	2	3	3	4	1	4	12.2	12.2	12.2	41.603
sp|P55081|MFAP1_HUMAN	sp|P55081|MFAP1_HUMAN	1	1	1	0.764303	1	1	1	1029500	1	1	1	786850	2	2	2	sp|P55081|MFAP1_HUMAN Microfibrillar-associated protein 1 OS=Homo sapiens GN=MFAP1 PE=1 SV=2	1	2	2	2	0	0	1	2	1	0	1	2	0	0	1	2	1	0	1	2	0	0	1	2	1	0	1	2	6.2	6.2	6.2	51.958
sp|P0CG48|UBC_HUMAN;tr|F5H265|F5H265_HUMAN;tr|Q96C32|Q96C32_HUMAN;sp|P0CG47|UBB_HUMAN;tr|Q5PY61|Q5PY61_HUMAN;tr|J3QKN0|J3QKN0_HUMAN;tr|F5GXK7|F5GXK7_HUMAN;tr|F5H747|F5H747_HUMAN;sp|P62979|RS27A_HUMAN;tr|B4DV12|B4DV12_HUMAN;tr|F5H388|F5H388_HUMAN;tr|F5H2Z3|F5H2Z3_HUMAN;tr|F5GYU3|F5GYU3_HUMAN;sp|P62987|RL40_HUMAN;tr|F5H6Q2|F5H6Q2_HUMAN;tr|J3QTR3|J3QTR3_HUMAN;tr|J3QS39|J3QS39_HUMAN;tr|M0R2S1|M0R2S1_…	sp|P0CG48|UBC_HUMAN;tr|F5H265|F5H265_HUMAN;tr|Q96C32|Q96C32_HUMAN;sp|P0CG47|UBB_HUMAN;tr|Q5PY61|Q5PY61_HUMAN;tr|J3QKN0|J3QKN0_HUMAN;tr|F5GXK7|F5GXK7_HUMAN;tr|F5H747|F5H747_HUMAN;sp|P62979|RS27A_HUMAN;tr|B4DV12|B4DV12_HUMAN;tr|F5H388|F5H388_HUMAN;tr|F5H2Z3|F5H2Z3_HUMAN;tr|F5GYU3|F5GYU3_HUMAN;sp|P62987|RL40_HUMAN;tr|F5H6Q2|F5H6Q2_HUMAN;tr|J3QTR3|J3QTR3_HUMAN;tr|J3QS39|J3QS39_HUMAN;tr|M0R2S1|M0R2S1_…	1.02249	0.773793	0.715231	0.760724	19694000	21330000	22074000	13591000	20137000	16505000	15788000	10339000	3;3;3;3;3;3;3;3;3;3;3;3;3;3;3;3;3;2;2;2;2;2;1;1;1;1	3;3;3;3;3;3;3;3;3;3;3;3;3;3;3;3;3;2;2;2;2;2;1;1;1;1	3;3;3;3;3;3;3;3;3;3;3;3;3;3;3;3;3;2;2;2;2;2;1;1;1;1	sp|P0CG48|UBC_HUMAN Polyubiquitin-C OS=Homo sapiens GN=UBC PE=1 SV=3;tr|F5H265|F5H265_HUMAN Polyubiquitin-C (Fragment) OS=Homo sapiens GN=UBC PE=1 SV=1;tr|Q96C32|Q96C32_HUMAN Polyubiquitin-C OS=Homo sapiens GN=UBC PE=1 SV=1;sp|P0CG47|UBB_HUMAN Polyubiquiti	26	3	3	3	3	3	2	3	3	3	2	2	3	3	2	3	3	3	2	2	3	3	2	3	3	3	2	2	44.7	44.7	44.7	77.038
tr|A0A087WZZ5|A0A087WZZ5_HUMAN;sp|Q13435|SF3B2_HUMAN;tr|E9PPJ0|E9PPJ0_HUMAN;tr|E9PJT3|E9PJT3_HUMAN;tr|E9PJ04|E9PJ04_HUMAN;tr|H0YCG1|H0YCG1_HUMAN;tr|H0YEX5|H0YEX5_HUMAN;tr|E9PIL8|E9PIL8_HUMAN	tr|A0A087WZZ5|A0A087WZZ5_HUMAN;sp|Q13435|SF3B2_HUMAN;tr|E9PPJ0|E9PPJ0_HUMAN	1.39859	1.11942	0.942814	0.754865	6936700	6633700	8521300	10227000	9701600	7425900	8034000	7720000	13;13;12;6;6;6;4;2	13;13;12;6;6;6;4;2	13;13;12;6;6;6;4;2	tr|A0A087WZZ5|A0A087WZZ5_HUMAN Splicing factor 3B subunit 2 OS=Homo sapiens GN=SF3B2 PE=1 SV=1;sp|Q13435|SF3B2_HUMAN Splicing factor 3B subunit 2 OS=Homo sapiens GN=SF3B2 PE=1 SV=2;tr|E9PPJ0|E9PPJ0_HUMAN Splicing factor 3B subunit 2 OS=Homo sapiens GN=SF3B	8	13	13	13	4	6	7	6	12	9	10	5	4	6	7	6	12	9	10	5	4	6	7	6	12	9	10	5	21.4	21.4	21.4	97.584
tr|F8VSC5|F8VSC5_HUMAN;sp|Q6P3W7|SCYL2_HUMAN;tr|F8VPW3|F8VPW3_HUMAN;tr|H0YIK6|H0YIK6_HUMAN	tr|F8VSC5|F8VSC5_HUMAN;sp|Q6P3W7|SCYL2_HUMAN	0.873981	0.8616	1.10066	0.754694	7459200	6375000	5099100	7323500	6519200	5492700	5612400	5527000	10;10;1;1	10;10;1;1	10;10;1;1	tr|F8VSC5|F8VSC5_HUMAN SCY1-like protein 2 (Fragment) OS=Homo sapiens GN=SCYL2 PE=1 SV=1;sp|Q6P3W7|SCYL2_HUMAN SCY1-like protein 2 OS=Homo sapiens GN=SCYL2 PE=1 SV=1	4	10	10	10	6	6	8	8	10	8	6	8	6	6	8	8	10	8	6	8	6	6	8	8	10	8	6	8	17.6	17.6	17.6	77.053
tr|E7ESP9|E7ESP9_HUMAN;sp|P07197|NFM_HUMAN;tr|E7EMV2|E7EMV2_HUMAN;tr|A0A087WYG8|A0A087WYG8_HUMAN;sp|Q16352|AINX_HUMAN	tr|E7ESP9|E7ESP9_HUMAN;sp|P07197|NFM_HUMAN;tr|E7EMV2|E7EMV2_HUMAN	0.985584	0.828019	1.08693	0.749963	7006200	6877500	5806100	6164300	6905200	5694700	6310800	4623000	15;15;14;3;3	14;14;13;2;2	13;13;12;1;1	tr|E7ESP9|E7ESP9_HUMAN Neurofilament medium polypeptide OS=Homo sapiens GN=NEFM PE=1 SV=1;sp|P07197|NFM_HUMAN Neurofilament medium polypeptide OS=Homo sapiens GN=NEFM PE=1 SV=3;tr|E7EMV2|E7EMV2_HUMAN Neurofilament medium polypeptide OS=Homo sapiens GN=NEFM	5	15	14	13	8	7	8	5	8	8	10	5	7	6	7	4	7	7	9	5	6	5	6	4	6	6	8	5	18	17	16.1	98.38
CON__P34955	CON__P34955	1611800	0.560077	0.786353	0.745934	1	2179700	2170400	2674500	1611800	1220800	1706700	1995000	4	4	4		1	4	4	4	1	2	3	3	4	2	4	2	1	2	3	3	4	2	4	2	1	2	3	3	4	2	4	2	12	12	12	46.103
sp|O75643|U520_HUMAN;tr|B4E0P5|B4E0P5_HUMAN	sp|O75643|U520_HUMAN	1.11617	1.02332	0.735322	0.734685	23741000	24232000	24169000	22788000	26499000	24797000	17772000	16742000	47;9	47;9	47;9	sp|O75643|U520_HUMAN U5 small nuclear ribonucleoprotein 200 kDa helicase OS=Homo sapiens GN=SNRNP200 PE=1 SV=2	2	47	47	47	18	16	26	25	38	32	29	27	18	16	26	25	38	32	29	27	18	16	26	25	38	32	29	27	23.4	23.4	23.4	244.5
sp|Q15459|SF3A1_HUMAN;tr|H7C1L2|H7C1L2_HUMAN	sp|Q15459|SF3A1_HUMAN	1.29988	5.71298e-07	0.804658	0.729366	1651300	1750400	1665800	1867100	2146500	1	1340400	1361800	7;1	7;1	7;1	sp|Q15459|SF3A1_HUMAN Splicing factor 3A subunit 1 OS=Homo sapiens GN=SF3A1 PE=1 SV=1	2	7	7	7	2	3	2	4	3	1	3	3	2	3	2	4	3	1	3	3	2	3	2	4	3	1	3	3	9.2	9.2	9.2	88.885
sp|O43813|LANC1_HUMAN;tr|V9P921|V9P921_HUMAN;tr|H0YHL2|H0YHL2_HUMAN	sp|O43813|LANC1_HUMAN;tr|V9P921|V9P921_HUMAN	1.16498	0.925364	0.789847	0.727329	4556800	4560800	4583800	5125600	5308600	4220400	3620500	3728000	11;8;5	11;8;5	11;8;5	sp|O43813|LANC1_HUMAN LanC-like protein 1 OS=Homo sapiens GN=LANCL1 PE=1 SV=1;tr|V9P921|V9P921_HUMAN Interferon regulatory factor 1 OS=Homo sapiens GN=IRF1 PE=1 SV=1	3	11	11	11	4	3	6	5	9	6	6	6	4	3	6	5	9	6	6	6	4	3	6	5	9	6	6	6	12.4	12.4	12.4	189.44
sp|Q14498|RBM39_HUMAN;tr|H0Y4X3|H0Y4X3_HUMAN;tr|G3XAC6|G3XAC6_HUMAN;tr|Q5QP23|Q5QP23_HUMAN;tr|A0A087X122|A0A087X122_HUMAN;tr|Q5QP22|Q5QP22_HUMAN;tr|H0YJJ3|H0YJJ3_HUMAN;sp|Q86U06|RBM23_HUMAN;tr|G3V5Z6|G3V5Z6_HUMAN;tr|G3XAP0|G3XAP0_HUMAN	sp|Q14498|RBM39_HUMAN;tr|H0Y4X3|H0Y4X3_HUMAN;tr|G3XAC6|G3XAC6_HUMAN	1.13812	0.860237	0.875111	0.723381	9458600	9833100	10394000	10778000	10765000	8458800	9095900	7796600	11;10;9;2;1;1;1;1;1;1	11;10;9;2;1;1;1;1;1;1	11;10;9;2;1;1;1;1;1;1	sp|Q14498|RBM39_HUMAN RNA-binding protein 39 OS=Homo sapiens GN=RBM39 PE=1 SV=2;tr|H0Y4X3|H0Y4X3_HUMAN RNA-binding protein 39 (Fragment) OS=Homo sapiens GN=RBM39 PE=1 SV=5;tr|G3XAC6|G3XAC6_HUMAN RNA-binding protein 39 OS=Homo sapiens GN=RBM39 PE=1 SV=1	10	11	11	11	4	5	10	8	7	10	9	8	4	5	10	8	7	10	9	8	4	5	10	8	7	10	9	8	23	23	23	59.379
sp|P02545|LMNA_HUMAN;tr|Q3BDU5|Q3BDU5_HUMAN;tr|Q5TCI8|Q5TCI8_HUMAN;tr|H0YAB0|H0YAB0_HUMAN;tr|A0A0C4DGC5|A0A0C4DGC5_HUMAN	sp|P02545|LMNA_HUMAN;tr|Q3BDU5|Q3BDU5_HUMAN;tr|Q5TCI8|Q5TCI8_HUMAN	1.12142	2171400	0.594786	0.720177	2845500	1	3363900	3067300	3191000	2171400	2000800	2209000	14;13;11;6;2	13;12;10;6;1	13;12;10;6;1	sp|P02545|LMNA_HUMAN Prelamin-A/C OS=Homo sapiens GN=LMNA PE=1 SV=1;tr|Q3BDU5|Q3BDU5_HUMAN Prelamin-A/C OS=Homo sapiens GN=LMNA PE=1 SV=1;tr|Q5TCI8|Q5TCI8_HUMAN Prelamin-A/C OS=Homo sapiens GN=LMNA PE=1 SV=1	5	14	13	13	2	1	6	9	9	6	8	5	2	1	5	8	9	6	8	5	2	1	5	8	9	6	8	5	23.6	22.4	22.4	74.139
sp|P35579|MYH9_HUMAN;tr|Q5BKV1|Q5BKV1_HUMAN	sp|P35579|MYH9_HUMAN	3043600	1958700	1704100	0.717315	1	1	1	2088900	3043600	1958700	1704100	1498400	12;1	9;1	8;1	sp|P35579|MYH9_HUMAN Myosin-9 OS=Homo sapiens GN=MYH9 PE=1 SV=4	2	12	9	8	1	1	3	3	11	10	6	5	0	0	0	2	8	7	4	4	0	0	0	2	7	7	3	4	7.7	5.7	4.8	226.53
sp|P02747|C1QC_HUMAN;tr|Q4ZFW0|Q4ZFW0_HUMAN;tr|H0YF45|H0YF45_HUMAN	sp|P02747|C1QC_HUMAN;tr|Q4ZFW0|Q4ZFW0_HUMAN;tr|H0YF45|H0YF45_HUMAN	1870100	2333900	1	0.710354	1	1	1	2125700	1870100	2333900	1	1510000	3;2;2	3;2;2	3;2;2	sp|P02747|C1QC_HUMAN Complement C1q subcomponent subunit C OS=Homo sapiens GN=C1QC PE=1 SV=3;tr|Q4ZFW0|Q4ZFW0_HUMAN Putative uncharacterized protein DKFZP564A2416 (Fragment) OS=Homo sapiens GN=DKFZP564A2416 PE=1 SV=1;tr|H0YF45|H0YF45_HUMAN ADP-ribosylation	3	3	3	3	1	0	1	2	3	2	1	2	1	0	1	2	3	2	1	2	1	0	1	2	3	2	1	2	7.3	7.3	7.3	68.538
sp|O75688|PPM1B_HUMAN;tr|C9JIR6|C9JIR6_HUMAN;tr|B8ZZF0|B8ZZF0_HUMAN;tr|E9PKB5|E9PKB5_HUMAN;sp|P35813|PPM1A_HUMAN;tr|E9PL75|E9PL75_HUMAN;tr|E9PJN3|E9PJN3_HUMAN	sp|O75688|PPM1B_HUMAN;tr|C9JIR6|C9JIR6_HUMAN;tr|B8ZZF0|B8ZZF0_HUMAN	0.755711	0.615125	0.91871	0.699516	11531000	11782000	8947000	8578500	8714100	7247400	8219700	6000800	11;10;9;2;2;1;1	11;10;9;2;2;1;1	11;10;9;2;2;1;1	sp|O75688|PPM1B_HUMAN Protein phosphatase 1B OS=Homo sapiens GN=PPM1B PE=1 SV=1;tr|C9JIR6|C9JIR6_HUMAN Protein phosphatase 1B (Fragment) OS=Homo sapiens GN=PPM1B PE=1 SV=1;tr|B8ZZF0|B8ZZF0_HUMAN Protein phosphatase 1B (Fragment) OS=Homo sapiens GN=PPM1B PE	7	11	11	11	6	6	8	8	8	8	8	8	6	6	8	8	8	8	8	8	6	6	8	8	8	8	8	8	28	28	28	52.642
sp|P23458|JAK1_HUMAN	sp|P23458|JAK1_HUMAN	0.748374	0.567478	0.71794	0.678963	13127000	14141000	10156000	9786400	9823900	8024700	7291400	6644600	17	17	17	sp|P23458|JAK1_HUMAN Tyrosine-protein kinase JAK1 OS=Homo sapiens GN=JAK1 PE=1 SV=2	1	17	17	17	6	7	13	11	11	12	11	12	6	7	13	11	11	12	11	12	6	7	13	11	11	12	11	12	16.4	16.4	16.4	133.28
sp|O43707|ACTN4_HUMAN;sp|Q9UKU0|ACSL6_HUMAN;sp|Q01718|ACTHR_HUMAN;tr|H3BPX1|H3BPX1_HUMAN;tr|C9JY72|C9JY72_HUMAN;tr|E9PL61|E9PL61_HUMAN;tr|E9PQ03|E9PQ03_HUMAN;tr|H0Y5K5|H0Y5K5_HUMAN;tr|C9J613|C9J613_HUMAN;tr|F8WET3|F8WET3_HUMAN;tr|C9JQU9|C9JQU9_HUMAN;sp|Q562R1|ACTBL_HUMAN;sp|P12814|ACTN1_HUMAN;tr|H9KV75|H9KV75_HUMAN;tr|D6RA67|D6RA67_HUMAN;tr|F5GXS2|F5GXS2_HUMAN;tr|H7C144|H7C144_HUMAN;tr|G3V2W4|G3V…	sp|O43707|ACTN4_HUMAN;sp|Q9UKU0|ACSL6_HUMAN;sp|Q01718|ACTHR_HUMAN;tr|H3BPX1|H3BPX1_HUMAN	1766600	1312100	1321400	0.659873	1	1	1	1933100	1766600	1312100	1321400	1275600	19;11;11;10;7;7;7;7;7;7;6;4;3;3;3;2;2;2;1;1;1;1;1;1;1;1;1;1;1	6;0;0;0;0;0;0;0;0;0;0;0;3;3;0;2;2;2;1;1;1;1;1;1;1;1;1;1;1	6;0;0;0;0;0;0;0;0;0;0;0;3;3;0;2;2;2;1;1;1;1;1;1;1;1;1;1;1	sp|O43707|ACTN4_HUMAN Alpha-actinin-4 OS=Homo sapiens GN=ACTN4 PE=1 SV=2;sp|Q9UKU0|ACSL6_HUMAN Long-chain-fatty-acid--CoA ligase 6 OS=Homo sapiens GN=ACSL6 PE=2 SV=4;sp|Q01718|ACTHR_HUMAN Adrenocorticotropic hormone receptor OS=Homo sapiens GN=MC2R PE=1 SV	29	19	6	6	10	9	12	13	19	15	16	14	0	0	0	2	6	2	4	3	0	0	0	2	6	2	4	3	14.6	5.5	5.5	153.41
tr|E9PCY5|E9PCY5_HUMAN;sp|Q02880|TOP2B_HUMAN	tr|E9PCY5|E9PCY5_HUMAN;sp|Q02880|TOP2B_HUMAN	578110	1287700	578970	0.658576	1	1	1	836790	578110	1287700	578970	551090	2;2	2;2	2;2	tr|E9PCY5|E9PCY5_HUMAN DNA topoisomerase 2 (Fragment) OS=Homo sapiens GN=TOP2B PE=1 SV=1;sp|Q02880|TOP2B_HUMAN DNA topoisomerase 2-beta OS=Homo sapiens GN=TOP2B PE=1 SV=3	2	2	2	2	0	0	0	2	2	2	2	2	0	0	0	2	2	2	2	2	0	0	0	2	2	2	2	2	2.1	2.1	2.1	130.48
CON__P00761;tr|A6XGL3|A6XGL3_HUMAN;tr|A0A087WWD8|A0A087WWD8_HUMAN;tr|E9PRA0|E9PRA0_HUMAN;tr|J3KQC6|J3KQC6_HUMAN;sp|Q9BYE2|TMPSD_HUMAN	CON__P00761	0.313306	0.409004	0.533836	0.644199	11889000000	15604000000	6330600000	5901900000	3724900000	6382100000	3379500000	3802000000	13;1;1;1;1;1	13;1;1;1;1;1	12;0;0;0;0;0		6	13	13	12	5	5	7	9	7	6	7	7	5	5	7	9	7	6	7	7	4	4	6	9	6	5	6	6	56.3	56.3	52.8	24.409
sp|P51991|ROA3_HUMAN	sp|P51991|ROA3_HUMAN	1.80312	1.10791	1.20302	0.64326	1801100	1667200	1954500	1862700	3247600	1847100	2351300	1198200	3	3	3	sp|P51991|ROA3_HUMAN Heterogeneous nuclear ribonucleoprotein A3 OS=Homo sapiens GN=HNRNPA3 PE=1 SV=2	1	3	3	3	2	2	2	2	3	2	2	2	2	2	2	2	3	2	2	2	2	2	2	2	3	2	2	2	10.3	10.3	10.3	39.594
sp|Q16514|TAF12_HUMAN	sp|Q16514|TAF12_HUMAN	1.71892e-07	3287400	1	0.608771	5817600	1	1	4467200	1	3287400	1	2719500	3	3	3	sp|Q16514|TAF12_HUMAN Transcription initiation factor TFIID subunit 12 OS=Homo sapiens GN=TAF12 PE=1 SV=1	1	3	3	3	2	1	1	3	1	2	1	2	2	1	1	3	1	2	1	2	2	1	1	3	1	2	1	2	18	18	18	17.924
sp|P20700|LMNB1_HUMAN;tr|E9PBF6|E9PBF6_HUMAN;tr|F5H5P2|F5H5P2_HUMAN;tr|A0A0D9SFY5|A0A0D9SFY5_HUMAN	sp|P20700|LMNB1_HUMAN;tr|E9PBF6|E9PBF6_HUMAN;tr|F5H5P2|F5H5P2_HUMAN	0.988468	0.707793	0.674771	0.604005	7327500	9150700	8016500	7659700	7243000	6476800	5409300	4626500	20;18;16;9	20;18;16;9	18;16;15;8	sp|P20700|LMNB1_HUMAN Lamin-B1 OS=Homo sapiens GN=LMNB1 PE=1 SV=2;tr|E9PBF6|E9PBF6_HUMAN Lamin-B1 OS=Homo sapiens GN=LMNB1 PE=1 SV=1;tr|F5H5P2|F5H5P2_HUMAN Uncharacterized protein OS=Homo sapiens PE=4 SV=1	4	20	20	18	8	9	9	9	14	10	9	12	8	9	9	9	14	10	9	12	8	9	8	8	13	10	9	11	34.1	34.1	31.4	66.408
sp|P50990|TCPQ_HUMAN;tr|H7C4C8|H7C4C8_HUMAN;tr|H7C2U0|H7C2U0_HUMAN	sp|P50990|TCPQ_HUMAN;tr|H7C4C8|H7C4C8_HUMAN	1519400	0.973103	0.795019	0.60363	1	1416500	1569900	1895200	1519400	1378400	1248100	1144000	4;2;1	4;2;1	4;2;1	sp|P50990|TCPQ_HUMAN T-complex protein 1 subunit theta OS=Homo sapiens GN=CCT8 PE=1 SV=4;tr|H7C4C8|H7C4C8_HUMAN T-complex protein 1 subunit theta (Fragment) OS=Homo sapiens GN=CCT8 PE=1 SV=1	3	4	4	4	1	2	3	3	2	2	3	4	1	2	3	3	2	2	3	4	1	2	3	3	2	2	3	4	8.8	8.8	8.8	59.62
sp|P18583|SON_HUMAN;tr|J3QSZ5|J3QSZ5_HUMAN;tr|H7C2G8|H7C2G8_HUMAN	sp|P18583|SON_HUMAN	0.802976	2305500	1.05998	0.595309	2694600	1	2027500	2459900	2163700	2305500	2149100	1464400	10;4;2	10;4;2	4;2;0	sp|P18583|SON_HUMAN Protein SON OS=Homo sapiens GN=SON PE=1 SV=4	3	10	10	4	2	1	2	2	6	6	8	6	2	1	2	2	6	6	8	6	0	0	1	1	1	3	3	3	6.8	6.8	2.3	263.83
tr|A0A087WV05|A0A087WV05_HUMAN;sp|Q99417|MYCBP_HUMAN;tr|A0A0D9SEI7|A0A0D9SEI7_HUMAN	tr|A0A087WV05|A0A087WV05_HUMAN;sp|Q99417|MYCBP_HUMAN	0.622402	0.637294	0.716297	0.590162	5118400	5988600	3629500	4828000	3185700	3816500	2599800	2849300	7;7;1	7;7;1	7;7;1	tr|A0A087WV05|A0A087WV05_HUMAN Uncharacterized protein OS=Homo sapiens PE=4 SV=1;sp|Q99417|MYCBP_HUMAN C-Myc-binding protein OS=Homo sapiens GN=MYCBP PE=1 SV=3	3	7	7	7	4	3	5	5	4	5	4	4	4	3	5	5	4	5	4	4	4	3	5	5	4	5	4	4	69.1	69.1	69.1	12.755
sp|P33992|MCM5_HUMAN;tr|B1AHB1|B1AHB1_HUMAN;tr|B1AHB2|B1AHB2_HUMAN;tr|B1AHA9|B1AHA9_HUMAN	sp|P33992|MCM5_HUMAN;tr|B1AHB1|B1AHB1_HUMAN	4317200	2894400	0.57863	0.585949	1	1	3715500	2889500	4317200	2894400	2149900	1693100	11;10;3;3	11;10;3;3	11;10;3;3	sp|P33992|MCM5_HUMAN DNA replication licensing factor MCM5 OS=Homo sapiens GN=MCM5 PE=1 SV=5;tr|B1AHB1|B1AHB1_HUMAN DNA helicase OS=Homo sapiens GN=MCM5 PE=1 SV=1	4	11	11	11	1	1	6	5	8	7	5	2	1	1	6	5	8	7	5	2	1	1	6	5	8	7	5	2	21	21	21	82.285
tr|H0YMZ1|H0YMZ1_HUMAN;sp|P25789|PSA4_HUMAN;tr|H0YL69|H0YL69_HUMAN;tr|H0YMI6|H0YMI6_HUMAN;tr|H0YMA1|H0YMA1_HUMAN;tr|H0YN18|H0YN18_HUMAN;tr|H0YKT8|H0YKT8_HUMAN;tr|H0YLC2|H0YLC2_HUMAN;tr|H0YKS0|H0YKS0_HUMAN;tr|H0YLS6|H0YLS6_HUMAN;tr|H0YMV3|H0YMV3_HUMAN	tr|H0YMZ1|H0YMZ1_HUMAN;sp|P25789|PSA4_HUMAN;tr|H0YL69|H0YL69_HUMAN;tr|H0YMI6|H0YMI6_HUMAN;tr|H0YMA1|H0YMA1_HUMAN;tr|H0YN18|H0YN18_HUMAN;tr|H0YKT8|H0YKT8_HUMAN;tr|H0YLC2|H0YLC2_HUMAN	1.18242e-07	0.638378	1.10162e-07	0.585047	8457200	12408000	9077500	11556000	1	7921000	1	6760800	5;5;5;4;4;4;3;3;2;2;1	5;5;5;4;4;4;3;3;2;2;1	5;5;5;4;4;4;3;3;2;2;1	tr|H0YMZ1|H0YMZ1_HUMAN Proteasome subunit alpha type (Fragment) OS=Homo sapiens GN=PSMA4 PE=1 SV=5;sp|P25789|PSA4_HUMAN Proteasome subunit alpha type-4 OS=Homo sapiens GN=PSMA4 PE=1 SV=1;tr|H0YL69|H0YL69_HUMAN Proteasome subunit alpha type (Fragment) OS=Ho	11	5	5	5	2	3	3	3	3	2	1	2	2	3	3	3	3	2	1	2	2	3	3	3	3	2	1	2	23.5	23.5	23.5	24.583
sp|Q6P2Q9|PRP8_HUMAN;tr|I3L0J9|I3L0J9_HUMAN;tr|I3L3Z8|I3L3Z8_HUMAN;tr|I3L1T8|I3L1T8_HUMAN	sp|Q6P2Q9|PRP8_HUMAN	1.11164	1.00552	0.548704	0.576852	31047000	32063000	33570000	32452000	34513000	32240000	18420000	18720000	59;21;7;2	59;21;7;2	59;21;7;2	sp|Q6P2Q9|PRP8_HUMAN Pre-mRNA-processing-splicing factor 8 OS=Homo sapiens GN=PRPF8 PE=1 SV=2	4	59	59	59	24	24	37	30	38	41	33	29	24	24	37	30	38	41	33	29	24	24	37	30	38	41	33	29	27.2	27.2	27.2	273.6
sp|P31942|HNRH3_HUMAN	sp|P31942|HNRH3_HUMAN	1	1	1	0.573281	1	1	1	2622100	1	1	1	1503200	4	4	4	sp|P31942|HNRH3_HUMAN Heterogeneous nuclear ribonucleoprotein H3 OS=Homo sapiens GN=HNRNPH3 PE=1 SV=2	1	4	4	4	1	1	0	3	2	1	2	3	1	1	0	3	2	1	2	3	1	1	0	3	2	1	2	3	17.1	17.1	17.1	36.926
sp|Q92974|ARHG2_HUMAN;tr|V9GYM8|V9GYM8_HUMAN;tr|Q5VY93|Q5VY93_HUMAN;tr|V9GYF0|V9GYF0_HUMAN;tr|V9GYG5|V9GYG5_HUMAN;tr|V9GZ14|V9GZ14_HUMAN;tr|V9GYF5|V9GYF5_HUMAN	sp|Q92974|ARHG2_HUMAN;tr|V9GYM8|V9GYM8_HUMAN	0.267597	0.367478	0.447952	0.572422	55621000	46098000	25025000	21713000	14884000	16940000	11210000	12429000	13;13;4;3;2;2;1	13;13;4;3;2;2;1	13;13;4;3;2;2;1	sp|Q92974|ARHG2_HUMAN Rho guanine nucleotide exchange factor 2 OS=Homo sapiens GN=ARHGEF2 PE=1 SV=4;tr|V9GYM8|V9GYM8_HUMAN Rho guanine nucleotide exchange factor 2 OS=Homo sapiens GN=ARHGEF2 PE=1 SV=1	7	13	13	13	10	9	10	7	9	10	10	9	10	9	10	7	9	10	10	9	10	9	10	7	9	10	10	9	23.2	23.2	23.2	111.54
tr|F8W6I7|F8W6I7_HUMAN;sp|P09651|ROA1_HUMAN;tr|F8VTQ5|F8VTQ5_HUMAN;tr|F8VZ49|F8VZ49_HUMAN;sp|Q32P51|RA1L2_HUMAN;tr|F8VYN5|F8VYN5_HUMAN;tr|F8W646|F8W646_HUMAN;tr|H0YH80|H0YH80_HUMAN	tr|F8W6I7|F8W6I7_HUMAN;sp|P09651|ROA1_HUMAN;tr|F8VTQ5|F8VTQ5_HUMAN;tr|F8VZ49|F8VZ49_HUMAN;sp|Q32P51|RA1L2_HUMAN	0.986401	1.48398	0.882417	0.562764	6176700	5266700	6296000	8238800	6092700	7815700	5555700	4636500	7;7;5;5;5;3;3;3	7;7;5;5;5;3;3;3	7;7;5;5;5;3;3;3	tr|F8W6I7|F8W6I7_HUMAN Heterogeneous nuclear ribonucleoprotein A1 OS=Homo sapiens GN=HNRNPA1 PE=1 SV=2;sp|P09651|ROA1_HUMAN Heterogeneous nuclear ribonucleoprotein A1 OS=Homo sapiens GN=HNRNPA1 PE=1 SV=5;tr|F8VTQ5|F8VTQ5_HUMAN Heterogeneous nuclear ribonuc	8	7	7	7	3	5	3	6	5	6	4	4	3	5	3	6	5	6	4	4	3	5	3	6	5	6	4	4	29.3	29.3	29.3	33.155
tr|J3KN10|J3KN10_HUMAN;sp|P42356|PI4KA_HUMAN;tr|A8MTF1|A8MTF1_HUMAN;sp|A4QPH2|PI4P2_HUMAN;sp|Q8N8J0|PI4P1_HUMAN;tr|C9JLI1|C9JLI1_HUMAN	tr|J3KN10|J3KN10_HUMAN;sp|P42356|PI4KA_HUMAN	1.09318	1.16385	0.665593	0.560667	5934500	4609800	8132300	8525200	6487500	5365100	5412800	4779800	24;23;4;3;2;1	24;23;4;3;2;1	24;23;4;3;2;1	tr|J3KN10|J3KN10_HUMAN Phosphatidylinositol 4-kinase alpha OS=Homo sapiens GN=PI4KA PE=1 SV=1;sp|P42356|PI4KA_HUMAN Phosphatidylinositol 4-kinase alpha OS=Homo sapiens GN=PI4KA PE=1 SV=3	6	24	24	24	5	5	13	16	17	9	9	10	5	5	13	16	17	9	9	10	5	5	13	16	17	9	9	10	14	14	14	236.83
sp|P05141|ADT2_HUMAN;sp|P12235|ADT1_HUMAN;tr|V9GYG0|V9GYG0_HUMAN;sp|Q9H0C2|ADT4_HUMAN	sp|P05141|ADT2_HUMAN;sp|P12235|ADT1_HUMAN	1.26995	1.06601	0.914168	0.557093	3300600	3035700	3142200	4025900	4191600	3236100	2872500	2242800	6;3;2;1	6;3;2;1	2;0;0;0	sp|P05141|ADT2_HUMAN ADP/ATP translocase 2 OS=Homo sapiens GN=SLC25A5 PE=1 SV=7;sp|P12235|ADT1_HUMAN ADP/ATP translocase 1 OS=Homo sapiens GN=SLC25A4 PE=1 SV=4	4	6	6	2	2	3	5	3	4	4	3	3	2	3	5	3	4	4	3	3	1	2	1	1	2	2	1	1	21.1	21.1	8.1	32.852
sp|Q8IX12|CCAR1_HUMAN;tr|A0A0C4DGG8|A0A0C4DGG8_HUMAN;tr|F5H1H2|F5H1H2_HUMAN;tr|F5H2E6|F5H2E6_HUMAN;tr|F5H3E1|F5H3E1_HUMAN;tr|H0YFJ7|H0YFJ7_HUMAN	sp|Q8IX12|CCAR1_HUMAN;tr|A0A0C4DGG8|A0A0C4DGG8_HUMAN;tr|F5H1H2|F5H1H2_HUMAN;tr|F5H2E6|F5H2E6_HUMAN	2089300	0.434209	0.510444	0.548064	1	5506100	3614500	4072700	2089300	2390800	1845000	2232100	6;5;3;3;2;1	6;5;3;3;2;1	6;5;3;3;2;1	sp|Q8IX12|CCAR1_HUMAN Cell division cycle and apoptosis regulator protein 1 OS=Homo sapiens GN=CCAR1 PE=1 SV=2;tr|A0A0C4DGG8|A0A0C4DGG8_HUMAN Cell division cycle and apoptosis regulator protein 1 (Fragment) OS=Homo sapiens GN=CCAR1 PE=1 SV=1;tr|F5H1H2|F5H1	6	6	6	6	1	2	4	4	5	3	4	4	1	2	4	4	5	3	4	4	1	2	4	4	5	3	4	4	7	7	7	132.82
tr|B8ZZJ1|B8ZZJ1_HUMAN;tr|H7C0W7|H7C0W7_HUMAN;sp|Q9BYI3|HYCCI_HUMAN;tr|B8ZZA2|B8ZZA2_HUMAN	tr|B8ZZJ1|B8ZZJ1_HUMAN;tr|H7C0W7|H7C0W7_HUMAN;sp|Q9BYI3|HYCCI_HUMAN	1771100	0.638615	0.5788	0.536069	1	2047400	2286800	2524300	1771100	1307500	1323600	1353200	6;5;5;2	6;5;5;2	6;5;5;2	tr|B8ZZJ1|B8ZZJ1_HUMAN Hyccin OS=Homo sapiens GN=FAM126A PE=1 SV=1;tr|H7C0W7|H7C0W7_HUMAN Hyccin (Fragment) OS=Homo sapiens GN=FAM126A PE=1 SV=1;sp|Q9BYI3|HYCCI_HUMAN Hyccin OS=Homo sapiens GN=FAM126A PE=1 SV=2	4	6	6	6	1	2	3	4	5	3	5	3	1	2	3	4	5	3	5	3	1	2	3	4	5	3	5	3	18.9	18.9	18.9	46.919
sp|P49792|RBP2_HUMAN;tr|J3KQ37|J3KQ37_HUMAN;sp|Q99666|RGPD5_HUMAN;sp|O14715|RGPD8_HUMAN;sp|P0DJD0|RGPD1_HUMAN;tr|F8VYC4|F8VYC4_HUMAN;sp|P0DJD1|RGPD2_HUMAN;tr|F8W705|F8W705_HUMAN;tr|F8WBP7|F8WBP7_HUMAN	sp|P49792|RBP2_HUMAN	1.95752	2.56679	0.60187	0.506549	2476700	1684400	4920500	3863400	4848200	4323500	2961500	1957000	16;6;6;6;5;5;5;2;1	16;6;6;6;5;5;5;2;1	8;0;0;0;0;0;0;0;1	sp|P49792|RBP2_HUMAN E3 SUMO-protein ligase RanBP2 OS=Homo sapiens GN=RANBP2 PE=1 SV=2	9	16	16	8	3	2	7	8	12	10	7	5	3	2	7	8	12	10	7	5	1	1	3	4	6	5	2	1	6.4	6.4	3.8	358.2
sp|Q9BWJ5|SF3B5_HUMAN	sp|Q9BWJ5|SF3B5_HUMAN	1	1	1	0.492417	1	1	1	1959600	1	1	1	964940	1	1	1	sp|Q9BWJ5|SF3B5_HUMAN Splicing factor 3B subunit 5 OS=Homo sapiens GN=SF3B5 PE=1 SV=1	1	1	1	1	0	0	1	1	1	0	1	1	0	0	1	1	1	0	1	1	0	0	1	1	1	0	1	1	15.1	15.1	15.1	10.135
sp|P22626|ROA2_HUMAN;tr|A0A087WUI2|A0A087WUI2_HUMAN	sp|P22626|ROA2_HUMAN;tr|A0A087WUI2|A0A087WUI2_HUMAN	1.01679	0.759443	0.487533	0.491596	7874900	8466200	9717900	10923000	8007100	6429600	4737800	5369700	12;10	12;10	12;10	sp|P22626|ROA2_HUMAN Heterogeneous nuclear ribonucleoproteins A2/B1 OS=Homo sapiens GN=HNRNPA2B1 PE=1 SV=2;tr|A0A087WUI2|A0A087WUI2_HUMAN Heterogeneous nuclear ribonucleoproteins A2/B1 OS=Homo sapiens GN=HNRNPA2B1 PE=1 SV=1	2	12	12	12	6	5	8	6	9	9	8	5	6	5	8	6	9	9	8	5	6	5	8	6	9	9	8	5	37.7	37.7	37.7	37.429
sp|O14654|IRS4_HUMAN	sp|O14654|IRS4_HUMAN	4653500	4000600	3.20657e-07	0.483729	1	1	3118600	3371100	4653500	4000600	1	1630700	14	14	14	sp|O14654|IRS4_HUMAN Insulin receptor substrate 4 OS=Homo sapiens GN=IRS4 PE=1 SV=1	1	14	14	14	2	1	5	4	8	9	0	2	2	1	5	4	8	9	0	2	2	1	5	4	8	9	0	2	12.3	12.3	12.3	133.77
sp|O43809|CPSF5_HUMAN;tr|H3BND3|H3BND3_HUMAN;tr|H3BV41|H3BV41_HUMAN	sp|O43809|CPSF5_HUMAN;tr|H3BND3|H3BND3_HUMAN	2437700	1802700	0.740969	0.414019	1	1	2671500	3197200	2437700	1802700	1979500	1323700	5;3;2	5;3;2	5;3;2	sp|O43809|CPSF5_HUMAN Cleavage and polyadenylation specificity factor subunit 5 OS=Homo sapiens GN=NUDT21 PE=1 SV=1;tr|H3BND3|H3BND3_HUMAN Cleavage and polyadenylation-specificity factor subunit 5 (Fragment) OS=Homo sapiens GN=NUDT21 PE=1 SV=5	3	5	5	5	1	1	2	2	4	2	4	3	1	1	2	2	4	2	4	3	1	1	2	2	4	2	4	3	29.1	29.1	29.1	26.227
sp|Q5QGS0|K2022_HUMAN;CON__P04264;CON__P35908v2;CON__P35908;CON__P02538;CON__P48668;CON__P04259;CON__P13647;CON__Q5XQN5;CON__Q922U2;CON__P50446;tr|F8W1Z5|F8W1Z5_HUMAN;CON__P05787;CON__ENSEMBL:ENSBTAP00000038253;CON__O95678;tr|H0YCA0|H0YCA0_HUMAN;CON__P12035;CON__Q8VED5;CON__Q01546;CON__Q5XKE5;tr|H0YIE9|H0YIE9_HUMAN;CON__Q3TTY5;tr|F8VRE4|F8VRE4_HUMAN;CON__Q9DCV7;CON__Q9R0H5;CON__Q3SY84;tr|F8W1F1|F…	sp|Q5QGS0|K2022_HUMAN	0.717644	0.771107	0.350475	0.4006	581040000	555150000	987460000	900150000	416980000	428080000	346080000	360600000	117;39;32;31;29;28;27;26;22;18;17;14;12;10;9;8;8;7;7;7;7;7;6;6;6;6;6;5;5;5;5;5;4;4;4;4;4;4;4;3;3;3;3;3;3;2;2;2;2;2;2;2;1;1;1;1;1;1;1;1;1;1;1;1;1	117;39;32;31;29;28;27;26;22;18;17;14;12;10;9;8;8;7;7;7;7;7;6;6;6;6;6;5;5;5;5;5;4;4;4;4;4;4;4;3;3;3;3;3;3;2;2;2;2;2;2;2;1;1;1;1;1;1;1;1;1;1;1;1;1	106;37;28;27;21;20;19;21;16;12;8;10;5;8;2;7;3;2;2;3;6;4;2;1;4;4;2;0;3;2;3;0;0;0;1;0;1;4;2;1;1;2;1;0;1;1;1;0;1;1;2;1;0;0;0;0;0;0;0;0;1;0;1;0;0	sp|Q5QGS0|K2022_HUMAN Protein KIAA2022 OS=Homo sapiens GN=KIAA2022 PE=2 SV=1	65	117	117	106	55	55	91	98	66	67	73	71	55	55	91	98	66	67	73	71	49	51	82	88	59	60	65	64	16	16	12.5	1491.9
sp|Q4VCS5|AMOT_HUMAN;tr|E7ERM3|E7ERM3_HUMAN;tr|A6NP16|A6NP16_HUMAN;sp|Q8IY63|AMOL1_HUMAN	sp|Q4VCS5|AMOT_HUMAN;tr|E7ERM3|E7ERM3_HUMAN;tr|A6NP16|A6NP16_HUMAN	0.837644	2375800	0.547058	0.362342	3626600	1	3843100	4235500	3037800	2375800	2102400	1534700	14;10;9;1	14;10;9;1	14;10;9;1	sp|Q4VCS5|AMOT_HUMAN Angiomotin OS=Homo sapiens GN=AMOT PE=1 SV=1;tr|E7ERM3|E7ERM3_HUMAN Angiomotin OS=Homo sapiens GN=AMOT PE=1 SV=1;tr|A6NP16|A6NP16_HUMAN Angiomotin OS=Homo sapiens GN=AMOT PE=1 SV=1	4	14	14	14	3	2	8	7	5	7	5	3	3	2	8	7	5	7	5	3	3	2	8	7	5	7	5	3	16.8	16.8	16.8	118.08
sp|P68871|HBB_HUMAN;tr|F8W6P5|F8W6P5_HUMAN;sp|P02042|HBD_HUMAN;tr|E9PFT6|E9PFT6_HUMAN;tr|E9PEW8|E9PEW8_HUMAN;CON__Q3SX09;tr|C9JRG0|C9JRG0_HUMAN;tr|A8MUF7|A8MUF7_HUMAN;tr|E9PBW4|E9PBW4_HUMAN;CON__P02070;sp|P69892|HBG2_HUMAN;sp|P69891|HBG1_HUMAN;sp|P02100|HBE_HUMAN	sp|P68871|HBB_HUMAN;tr|F8W6P5|F8W6P5_HUMAN;sp|P02042|HBD_HUMAN;tr|E9PFT6|E9PFT6_HUMAN	0.265763	0.305875	0.475277	0.361232	60919000	39016000	25604000	21368000	16190000	11934000	12169000	7718800	10;7;6;5;4;2;1;1;1;1;1;1;1	10;7;6;5;4;2;1;1;1;1;1;1;1	10;7;6;5;4;2;1;1;1;1;1;1;1	sp|P68871|HBB_HUMAN Hemoglobin subunit beta OS=Homo sapiens GN=HBB PE=1 SV=2;tr|F8W6P5|F8W6P5_HUMAN Hemoglobin subunit beta (Fragment) OS=Homo sapiens GN=HBB PE=1 SV=1;sp|P02042|HBD_HUMAN Hemoglobin subunit delta OS=Homo sapiens GN=HBD PE=1 SV=2;tr|E9PFT6|	13	10	10	10	9	7	9	8	6	4	5	3	9	7	9	8	6	4	5	3	9	7	9	8	6	4	5	3	74.1	74.1	74.1	15.998
sp|P69905|HBA_HUMAN;tr|J3KSR5|J3KSR5_HUMAN	sp|P69905|HBA_HUMAN;tr|J3KSR5|J3KSR5_HUMAN	0.618201	0.646869	0.401184	0.349037	13851000	7447100	11654000	7598900	8562700	4817300	4675400	2652300	5;3	5;3	2;1	sp|P69905|HBA_HUMAN Hemoglobin subunit alpha OS=Homo sapiens GN=HBA1 PE=1 SV=2;tr|J3KSR5|J3KSR5_HUMAN Mitochondrial Rho GTPase 1 OS=Homo sapiens GN=RHOT1 PE=1 SV=1	2	5	5	2	4	4	3	4	3	4	3	3	4	4	3	4	3	4	3	3	1	1	1	1	1	2	2	2	43	43	19	15.257
sp|Q8N8K9|K1958_HUMAN;CON__P13645;CON__P35527;CON__P08779;CON__P02533;CON__Q04695;CON__Q9QWL7;tr|A0A0G2JKI4|A0A0G2JKI4_HUMAN;tr|A8MVH1|A8MVH1_HUMAN;CON__Q6IFX2;tr|H3BNJ8|H3BNJ8_HUMAN;CON__Q9Z2K1;CON__Q3ZAW8;CON__P08727;tr|E5RHT5|E5RHT5_HUMAN;CON__P02535-1;CON__P19001;tr|C9JMM4|C9JMM4_HUMAN;CON__P19012;CON__A2A4G1;CON__P08730-1;CON__P13646-1;tr|H3BUK1|H3BUK1_HUMAN;CON__ENSEMBL:ENSP00000377550;tr|K…	sp|Q8N8K9|K1958_HUMAN	0.754764	0.638003	0.368512	0.328969	809670000	844730000	1477700000	1495400000	611110000	538940000	544550000	491940000	100;29;26;25;23;16;13;13;12;12;9;9;9;8;8;8;7;7;6;6;6;5;5;5;4;4;3;3;3;3;3;3;3;2;2;2;2;1;1;1;1;1;1;1	100;29;26;25;23;16;13;13;12;12;9;9;9;8;8;8;7;7;6;6;6;5;5;5;4;4;3;3;3;3;3;3;3;2;2;2;2;1;1;1;1;1;1;1	100;29;26;25;23;16;13;13;12;12;9;9;9;8;8;8;7;7;6;6;6;5;5;5;4;4;3;3;3;3;3;3;3;2;2;2;2;1;1;1;1;1;1;1	sp|Q8N8K9|K1958_HUMAN Uncharacterized protein KIAA1958 OS=Homo sapiens GN=KIAA1958 PE=1 SV=1	44	100	100	100	50	49	79	76	53	56	64	63	50	49	79	76	53	56	64	63	50	49	79	76	53	56	64	63	12.3	12.3	12.3	1292.5
sp|Q9UQ35|SRRM2_HUMAN;tr|I3L4D8|I3L4D8_HUMAN;tr|I3L1I8|I3L1I8_HUMAN;tr|I3L182|I3L182_HUMAN;tr|I3L1C0|I3L1C0_HUMAN;tr|A0A087X1W1|A0A087X1W1_HUMAN;tr|I3L0N7|I3L0N7_HUMAN	sp|Q9UQ35|SRRM2_HUMAN	1.01309	0.825895	0.232426	0.178797	17951000	18374000	14735000	13696000	18186000	15175000	3424800	2448800	24;5;4;4;3;3;1	24;5;4;4;3;3;1	24;5;4;4;3;3;1	sp|Q9UQ35|SRRM2_HUMAN Serine/arginine repetitive matrix protein 2 OS=Homo sapiens GN=SRRM2 PE=1 SV=2	7	24	24	24	11	11	12	14	18	14	5	5	11	11	12	14	18	14	5	5	11	11	12	14	18	14	5	5	13	13	13	299.61
tr|A0A024R5I4|A0A024R5I4_HUMAN;sp|P98175|RBM10_HUMAN	tr|A0A024R5I4|A0A024R5I4_HUMAN;sp|P98175|RBM10_HUMAN	0.211586	0.20194	0.159921	0.157749	796790000	848620000	888940000	794680000	168590000	171370000	142160000	125360000	58;54	58;54	55;51	tr|A0A024R5I4|A0A024R5I4_HUMAN Solute carrier organic anion transporter family member OS=Homo sapiens GN=SLCO2B1 PE=1 SV=1;sp|P98175|RBM10_HUMAN RNA-binding protein 10 OS=Homo sapiens GN=RBM10 PE=1 SV=3	2	58	58	55	46	44	47	51	33	30	34	33	46	44	47	51	33	30	34	33	45	42	46	50	31	29	33	32	26	26	25.5	247.6
tr|M0R221|M0R221_HUMAN;tr|M0R2B8|M0R2B8_HUMAN;sp|P09012|SNRPA_HUMAN;tr|M0R0G9|M0R0G9_HUMAN;tr|M0QXK2|M0QXK2_HUMAN;tr|M0QZG7|M0QZG7_HUMAN;tr|M0R268|M0R268_HUMAN	tr|M0R221|M0R221_HUMAN;tr|M0R2B8|M0R2B8_HUMAN;sp|P09012|SNRPA_HUMAN;tr|M0R0G9|M0R0G9_HUMAN;tr|M0QXK2|M0QXK2_HUMAN;tr|M0QZG7|M0QZG7_HUMAN;tr|M0R268|M0R268_HUMAN	6878600	1	1	0	1	1	1	5112000	6878600	1	1	0	4;4;4;3;3;3;2	3;3;3;2;2;2;1	3;3;3;2;2;2;1	tr|M0R221|M0R221_HUMAN U1 small nuclear ribonucleoprotein A (Fragment) OS=Homo sapiens GN=SNRPA PE=1 SV=1;tr|M0R2B8|M0R2B8_HUMAN U1 small nuclear ribonucleoprotein A (Fragment) OS=Homo sapiens GN=SNRPA PE=1 SV=1;sp|P09012|SNRPA_HUMAN U1 small nuclear ribon	7	4	3	3	2	2	2	3	4	1	2	1	1	1	1	2	3	0	1	0	1	1	1	2	3	0	1	0	35.2	29.6	29.6	15.945
sp|P01859|IGHG2_HUMAN;tr|A0A0G2JN06|A0A0G2JN06_HUMAN	sp|P01859|IGHG2_HUMAN;tr|A0A0G2JN06|A0A0G2JN06_HUMAN	6104100	1	1	0	1	1	1	1	6104100	1	1	0	1;1	1;1	1;1	sp|P01859|IGHG2_HUMAN Ig gamma-2 chain C region OS=Homo sapiens GN=IGHG2 PE=1 SV=2;tr|A0A0G2JN06|A0A0G2JN06_HUMAN Uncharacterized protein OS=Homo sapiens PE=4 SV=1	2	1	1	1	0	0	0	0	1	0	0	0	0	0	0	0	1	0	0	0	0	0	0	0	1	0	0	0	2.8	2.8	2.8	35.9
sp|P54105|ICLN_HUMAN;tr|E9PMI6|E9PMI6_HUMAN;tr|E9PJF4|E9PJF4_HUMAN;tr|J3KN38|J3KN38_HUMAN	sp|P54105|ICLN_HUMAN;tr|E9PMI6|E9PMI6_HUMAN;tr|E9PJF4|E9PJF4_HUMAN;tr|J3KN38|J3KN38_HUMAN	2717200	1	2175900	0	1	1	1	1	2717200	1	2175900	0	3;2;2;2	3;2;2;2	3;2;2;2	sp|P54105|ICLN_HUMAN Methylosome subunit pICln OS=Homo sapiens GN=CLNS1A PE=1 SV=1;tr|E9PMI6|E9PMI6_HUMAN Methylosome subunit pICln OS=Homo sapiens GN=CLNS1A PE=1 SV=1;tr|E9PJF4|E9PJF4_HUMAN Methylosome subunit pICln OS=Homo sapiens GN=CLNS1A PE=1 SV=1;tr|	4	3	3	3	1	1	1	1	2	1	3	1	1	1	1	1	2	1	3	1	1	1	1	1	2	1	3	1	25.3	25.3	25.3	26.215
sp|Q9NU22|MDN1_HUMAN;tr|Q5T795|Q5T795_HUMAN;tr|M0QXR3|M0QXR3_HUMAN	sp|Q9NU22|MDN1_HUMAN	2459200	1	1	0	1	1	1	1	2459200	1	1	0	10;3;1	10;3;1	10;3;1	sp|Q9NU22|MDN1_HUMAN Midasin OS=Homo sapiens GN=MDN1 PE=1 SV=2	3	10	10	10	0	0	0	1	9	1	0	0	0	0	0	1	9	1	0	0	0	0	0	1	9	1	0	0	2.2	2.2	2.2	632.81
tr|C9JXB8|C9JXB8_HUMAN;tr|C9JNW5|C9JNW5_HUMAN;sp|P83731|RL24_HUMAN	tr|C9JXB8|C9JXB8_HUMAN;tr|C9JNW5|C9JNW5_HUMAN;sp|P83731|RL24_HUMAN	2331100	3.12725e-07	3045800	0	1	3197700	1	2060300	2331100	1	3045800	0	3;3;3	3;3;3	3;3;3	tr|C9JXB8|C9JXB8_HUMAN 60S ribosomal protein L24 OS=Homo sapiens GN=RPL24 PE=1 SV=1;tr|C9JNW5|C9JNW5_HUMAN 60S ribosomal protein L24 OS=Homo sapiens GN=RPL24 PE=1 SV=1;sp|P83731|RL24_HUMAN 60S ribosomal protein L24 OS=Homo sapiens GN=RPL24 PE=1 SV=1	3	3	3	3	0	2	1	2	2	1	3	1	0	2	1	2	2	1	3	1	0	2	1	2	2	1	3	1	24.8	24.8	24.8	14.369
sp|Q71UI9|H2AV_HUMAN;sp|P0C0S5|H2AZ_HUMAN;tr|C9J0D1|C9J0D1_HUMAN;tr|C9J386|C9J386_HUMAN	sp|Q71UI9|H2AV_HUMAN;sp|P0C0S5|H2AZ_HUMAN;tr|C9J0D1|C9J0D1_HUMAN	2294200	1613400	3017300	0	1	1	1	1	2294200	1613400	3017300	0	3;3;2;1	2;2;1;1	2;2;1;1	sp|Q71UI9|H2AV_HUMAN Histone H2A.V OS=Homo sapiens GN=H2AFV PE=1 SV=3;sp|P0C0S5|H2AZ_HUMAN Histone H2A.Z OS=Homo sapiens GN=H2AFZ PE=1 SV=2;tr|C9J0D1|C9J0D1_HUMAN Histone H2A OS=Homo sapiens GN=H2AFV PE=3 SV=1	4	3	2	2	2	2	2	2	2	2	3	3	1	1	1	1	2	2	2	2	1	1	1	1	2	2	2	2	25.8	18.8	18.8	13.509
sp|P49368|TCPG_HUMAN;tr|B4DUR8|B4DUR8_HUMAN;tr|Q5SZX6|Q5SZX6_HUMAN	sp|P49368|TCPG_HUMAN;tr|B4DUR8|B4DUR8_HUMAN	2245100	1	2734900	0	1	1	1	1	2245100	1	2734900	0	5;5;1	5;5;1	5;5;1	sp|P49368|TCPG_HUMAN T-complex protein 1 subunit gamma OS=Homo sapiens GN=CCT3 PE=1 SV=4;tr|B4DUR8|B4DUR8_HUMAN T-complex protein 1 subunit gamma OS=Homo sapiens GN=CCT3 PE=1 SV=1	3	5	5	5	0	1	2	1	3	0	2	2	0	1	2	1	3	0	2	2	0	1	2	1	3	0	2	2	10.8	10.8	10.8	60.533
tr|M0R3F6|M0R3F6_HUMAN;sp|Q8IX01|SUGP2_HUMAN;tr|M0R2Z9|M0R2Z9_HUMAN	tr|M0R3F6|M0R3F6_HUMAN;sp|Q8IX01|SUGP2_HUMAN;tr|M0R2Z9|M0R2Z9_HUMAN	2160700	1	1917700	0	1	1	1	1	2160700	1	1917700	0	5;5;5	5;5;5	5;5;5	tr|M0R3F6|M0R3F6_HUMAN SURP and G-patch domain-containing protein 2 OS=Homo sapiens GN=SUGP2 PE=1 SV=1;sp|Q8IX01|SUGP2_HUMAN SURP and G-patch domain-containing protein 2 OS=Homo sapiens GN=SUGP2 PE=1 SV=2;tr|M0R2Z9|M0R2Z9_HUMAN SURP and G-patch domain-cont	3	5	5	5	0	0	1	1	4	1	4	1	0	0	1	1	4	1	4	1	0	0	1	1	4	1	4	1	7	7	7	93.859
sp|P15924|DESP_HUMAN	sp|P15924|DESP_HUMAN	2138900	1	0.830404	0	1	1	2241800	2728100	2138900	1	1861600	0	13	13	13	sp|P15924|DESP_HUMAN Desmoplakin OS=Homo sapiens GN=DSP PE=1 SV=3	1	13	13	13	0	1	4	7	6	2	3	1	0	1	4	7	6	2	3	1	0	1	4	7	6	2	3	1	4.6	4.6	4.6	331.77
sp|P42766|RL35_HUMAN;tr|F2Z388|F2Z388_HUMAN	sp|P42766|RL35_HUMAN;tr|F2Z388|F2Z388_HUMAN	2137400	2281700	4126200	0	1	1	1	1	2137400	2281700	4126200	0	2;1	2;1	2;1	sp|P42766|RL35_HUMAN 60S ribosomal protein L35 OS=Homo sapiens GN=RPL35 PE=1 SV=2;tr|F2Z388|F2Z388_HUMAN 60S ribosomal protein L35 OS=Homo sapiens GN=RPL35 PE=1 SV=1	2	2	2	2	0	0	0	1	2	2	2	1	0	0	0	1	2	2	2	1	0	0	0	1	2	2	2	1	17.9	17.9	17.9	14.551
tr|C9J4M6|C9J4M6_HUMAN;tr|C9J2Y9|C9J2Y9_HUMAN;sp|P30876|RPB2_HUMAN	tr|C9J4M6|C9J4M6_HUMAN;tr|C9J2Y9|C9J2Y9_HUMAN;sp|P30876|RPB2_HUMAN	1900200	1	1	0	1	1	1	1	1900200	1	1	0	7;7;7	7;7;7	7;7;7	tr|C9J4M6|C9J4M6_HUMAN DNA-directed RNA polymerase OS=Homo sapiens GN=POLR2B PE=1 SV=2;tr|C9J2Y9|C9J2Y9_HUMAN DNA-directed RNA polymerase OS=Homo sapiens GN=POLR2B PE=1 SV=2;sp|P30876|RPB2_HUMAN DNA-directed RNA polymerase II subunit RPB2 OS=Homo sapiens G	3	7	7	7	0	0	0	0	6	1	2	2	0	0	0	0	6	1	2	2	0	0	0	0	6	1	2	2	6.7	6.7	6.7	125.19
sp|P12270|TPR_HUMAN;tr|Q5SWX9|Q5SWX9_HUMAN	sp|P12270|TPR_HUMAN	1815700	1	1	0	1	1	1	1	1815700	1	1	0	6;1	6;1	6;1	sp|P12270|TPR_HUMAN Nucleoprotein TPR OS=Homo sapiens GN=TPR PE=1 SV=3	2	6	6	6	0	1	1	1	5	1	1	1	0	1	1	1	5	1	1	1	0	1	1	1	5	1	1	1	2.9	2.9	2.9	267.29
sp|P40227|TCPZ_HUMAN	sp|P40227|TCPZ_HUMAN	1798000	1	1345600	0	1	1	1	1	1798000	1	1345600	0	7	7	6	sp|P40227|TCPZ_HUMAN T-complex protein 1 subunit zeta OS=Homo sapiens GN=CCT6A PE=1 SV=3	1	7	7	6	0	0	1	2	3	1	4	1	0	0	1	2	3	1	4	1	0	0	1	2	2	1	4	1	15.4	15.4	13	58.024
sp|O75400|PR40A_HUMAN;tr|F5H578|F5H578_HUMAN;tr|H7C2N3|H7C2N3_HUMAN;tr|H0YG38|H0YG38_HUMAN	sp|O75400|PR40A_HUMAN	1618000	1	1	0	1	1	1	1	1618000	1	1	0	5;2;1;1	5;2;1;1	5;2;1;1	sp|O75400|PR40A_HUMAN Pre-mRNA-processing factor 40 homolog A OS=Homo sapiens GN=PRPF40A PE=1 SV=2	4	5	5	5	1	0	2	2	2	1	1	2	1	0	2	2	2	1	1	2	1	0	2	2	2	1	1	2	6.1	6.1	6.1	108.8
sp|Q9NQT5|EXOS3_HUMAN	sp|Q9NQT5|EXOS3_HUMAN	1602900	1	1	0	1	1	1	1	1602900	1	1	0	2	2	2	sp|Q9NQT5|EXOS3_HUMAN Exosome complex component RRP40 OS=Homo sapiens GN=EXOSC3 PE=1 SV=3	1	2	2	2	0	1	1	0	2	0	0	1	0	1	1	0	2	0	0	1	0	1	1	0	2	0	0	1	11.3	11.3	11.3	29.572
sp|Q9H3K6|BOLA2_HUMAN;tr|H3BV85|H3BV85_HUMAN;tr|H3BTW0|H3BTW0_HUMAN;tr|A0A0B4J295|A0A0B4J295_HUMAN;tr|H3BVE0|H3BVE0_HUMAN	sp|Q9H3K6|BOLA2_HUMAN;tr|H3BV85|H3BV85_HUMAN;tr|H3BTW0|H3BTW0_HUMAN;tr|A0A0B4J295|A0A0B4J295_HUMAN;tr|H3BVE0|H3BVE0_HUMAN	1545700	1	1	0	1	1	1	1002600	1545700	1	1	0	4;2;2;2;2	4;2;2;2;2	4;2;2;2;2	sp|Q9H3K6|BOLA2_HUMAN BolA-like protein 2 OS=Homo sapiens GN=BOLA2 PE=1 SV=1;tr|H3BV85|H3BV85_HUMAN BolA-like protein 2 (Fragment) OS=Homo sapiens GN=BOLA2B PE=1 SV=1;tr|H3BTW0|H3BTW0_HUMAN Uncharacterized protein (Fragment) OS=Homo sapiens PE=3 SV=1;tr|A0	5	4	4	4	1	0	1	2	2	2	1	2	1	0	1	2	2	2	1	2	1	0	1	2	2	2	1	2	50	50	50	10.116
sp|Q5VWN6|F208B_HUMAN	sp|Q5VWN6|F208B_HUMAN	1464200	1747600	1.43008	0	1	1	1394400	1304300	1464200	1747600	1994100	0	6	6	6	sp|Q5VWN6|F208B_HUMAN Protein FAM208B OS=Homo sapiens GN=FAM208B PE=1 SV=1	1	6	6	6	0	0	2	2	5	2	4	2	0	0	2	2	5	2	4	2	0	0	2	2	5	2	4	2	3.4	3.4	3.4	268.84
sp|O95425|SVIL_HUMAN	sp|O95425|SVIL_HUMAN	1448800	1039300	760540	0	1	1	1	1	1448800	1039300	760540	0	7	7	7	sp|O95425|SVIL_HUMAN Supervillin OS=Homo sapiens GN=SVIL PE=1 SV=2	1	7	7	7	0	0	0	0	6	2	2	1	0	0	0	0	6	2	2	1	0	0	0	0	6	2	2	1	4.3	4.3	4.3	247.74
sp|Q13123|RED_HUMAN;tr|D6REL4|D6REL4_HUMAN;tr|Q9H4P6|Q9H4P6_HUMAN;tr|E7EQZ7|E7EQZ7_HUMAN;tr|D6RAY9|D6RAY9_HUMAN	sp|Q13123|RED_HUMAN;tr|D6REL4|D6REL4_HUMAN;tr|Q9H4P6|Q9H4P6_HUMAN;tr|E7EQZ7|E7EQZ7_HUMAN	1443200	1208000	1.00587	0	1	1	1772400	1	1443200	1208000	1782800	0	3;2;2;2;1	3;2;2;2;1	3;2;2;2;1	sp|Q13123|RED_HUMAN Protein Red OS=Homo sapiens GN=IK PE=1 SV=3;tr|D6REL4|D6REL4_HUMAN Protein Red (Fragment) OS=Homo sapiens GN=IK PE=1 SV=5;tr|Q9H4P6|Q9H4P6_HUMAN Clone TCCCIA00142 mRNA sequence OS=Homo sapiens GN=IK PE=1 SV=1;tr|E7EQZ7|E7EQZ7_HUMAN Prot	5	3	3	3	0	0	2	1	3	2	3	1	0	0	2	1	3	2	3	1	0	0	2	1	3	2	3	1	6.8	6.8	6.8	65.601
tr|F8WE65|F8WE65_HUMAN;tr|C9J5S7|C9J5S7_HUMAN;sp|P62937|PPIA_HUMAN	tr|F8WE65|F8WE65_HUMAN;tr|C9J5S7|C9J5S7_HUMAN;sp|P62937|PPIA_HUMAN	1437300	1	7.7688e-07	0	1	1	1287200	1	1437300	1	1	0	2;2;2	2;2;2	2;2;2	tr|F8WE65|F8WE65_HUMAN Peptidyl-prolyl cis-trans isomerase OS=Homo sapiens GN=PPIA PE=1 SV=1;tr|C9J5S7|C9J5S7_HUMAN Peptidyl-prolyl cis-trans isomerase OS=Homo sapiens GN=PPIA PE=1 SV=1;sp|P62937|PPIA_HUMAN Peptidyl-prolyl cis-trans isomerase A OS=Homo sap	3	2	2	2	1	1	2	0	2	1	1	0	1	1	2	0	2	1	1	0	1	1	2	0	2	1	1	0	20	20	20	13.022
sp|Q8NAV1|PR38A_HUMAN	sp|Q8NAV1|PR38A_HUMAN	1433000	1467300	0.886003	0	1	1	1524600	1387200	1433000	1467300	1350800	0	4	4	4	sp|Q8NAV1|PR38A_HUMAN Pre-mRNA-splicing factor 38A OS=Homo sapiens GN=PRPF38A PE=1 SV=1	1	4	4	4	0	0	2	3	3	2	3	1	0	0	2	3	3	2	3	1	0	0	2	3	3	2	3	1	12.5	12.5	12.5	37.476
tr|H3BQZ7|H3BQZ7_HUMAN;sp|Q1KMD3|HNRL2_HUMAN	tr|H3BQZ7|H3BQZ7_HUMAN;sp|Q1KMD3|HNRL2_HUMAN	1355100	1	1314100	0	1	1	1	1	1355100	1	1314100	0	4;4	4;4	4;4	tr|H3BQZ7|H3BQZ7_HUMAN HCG2044799 OS=Homo sapiens GN=HNRNPUL2-BSCL2 PE=4 SV=1;sp|Q1KMD3|HNRL2_HUMAN Heterogeneous nuclear ribonucleoprotein U-like protein 2 OS=Homo sapiens GN=HNRNPUL2 PE=1 SV=1	2	4	4	4	0	0	0	0	3	1	2	2	0	0	0	0	3	1	2	2	0	0	0	0	3	1	2	2	6	6	6	84.69
sp|Q7Z353|HDX_HUMAN;tr|E2QRN0|E2QRN0_HUMAN	sp|Q7Z353|HDX_HUMAN	1348600	7.70119e-07	0.906408	0	1	1298500	1267200	1	1348600	1	1148600	0	6;2	6;2	6;2	sp|Q7Z353|HDX_HUMAN Highly divergent homeobox OS=Homo sapiens GN=HDX PE=1 SV=1	2	6	6	6	1	2	3	2	3	1	2	2	1	2	3	2	3	1	2	2	1	2	3	2	3	1	2	2	9.6	9.6	9.6	77.205
tr|C9JR56|C9JR56_HUMAN;sp|Q9UPW6|SATB2_HUMAN;sp|Q01826|SATB1_HUMAN	tr|C9JR56|C9JR56_HUMAN;sp|Q9UPW6|SATB2_HUMAN	1286500	1229000	1	0	1	1	1	1	1286500	1229000	1	0	3;3;1	3;3;1	3;3;1	tr|C9JR56|C9JR56_HUMAN DNA-binding protein SATB OS=Homo sapiens GN=SATB2 PE=1 SV=1;sp|Q9UPW6|SATB2_HUMAN DNA-binding protein SATB2 OS=Homo sapiens GN=SATB2 PE=1 SV=2	3	3	3	3	0	0	0	0	3	2	1	1	0	0	0	0	3	2	1	1	0	0	0	0	3	2	1	1	7	7	7	76.034
sp|P62857|RS28_HUMAN	sp|P62857|RS28_HUMAN	1260000	1109200	5.32737e-07	0	1	1	1877100	1	1260000	1109200	1	0	2	2	2	sp|P62857|RS28_HUMAN 40S ribosomal protein S28 OS=Homo sapiens GN=RPS28 PE=1 SV=1	1	2	2	2	1	1	2	1	2	2	2	1	1	1	2	1	2	2	2	1	1	1	2	1	2	2	2	1	30.4	30.4	30.4	7.8409
sp|P06702|S10A9_HUMAN	sp|P06702|S10A9_HUMAN	1240700	1529400	5.22985e-07	0	1	1	1912100	1582100	1240700	1529400	1	0	3	3	3	sp|P06702|S10A9_HUMAN Protein S100-A9 OS=Homo sapiens GN=S100A9 PE=1 SV=1	1	3	3	3	1	1	2	2	2	3	1	1	1	1	2	2	2	3	1	1	1	1	2	2	2	3	1	1	30.7	30.7	30.7	13.242
sp|Q9BRS2|RIOK1_HUMAN	sp|Q9BRS2|RIOK1_HUMAN	1225300	1	1	0	1	1	1	1	1225300	1	1	0	3	3	3	sp|Q9BRS2|RIOK1_HUMAN Serine/threonine-protein kinase RIO1 OS=Homo sapiens GN=RIOK1 PE=1 SV=2	1	3	3	3	1	1	1	1	2	2	1	1	1	1	1	1	2	2	1	1	1	1	1	1	2	2	1	1	6.2	6.2	6.2	65.582
sp|O75683|SURF6_HUMAN	sp|O75683|SURF6_HUMAN	1180500	1	1366400	0	1	1	1	1	1180500	1	1366400	0	4	4	4	sp|O75683|SURF6_HUMAN Surfeit locus protein 6 OS=Homo sapiens GN=SURF6 PE=1 SV=3	1	4	4	4	0	0	0	0	2	1	3	2	0	0	0	0	2	1	3	2	0	0	0	0	2	1	3	2	10.2	10.2	10.2	41.45
sp|P59998|ARPC4_HUMAN;tr|F8WCF6|F8WCF6_HUMAN;tr|R4GN08|R4GN08_HUMAN;tr|F8WDD7|F8WDD7_HUMAN;tr|H7C0A3|H7C0A3_HUMAN;tr|A0A0A6YYG9|A0A0A6YYG9_HUMAN	sp|P59998|ARPC4_HUMAN;tr|F8WCF6|F8WCF6_HUMAN;tr|R4GN08|R4GN08_HUMAN;tr|F8WDD7|F8WDD7_HUMAN;tr|H7C0A3|H7C0A3_HUMAN;tr|A0A0A6YYG9|A0A0A6YYG9_HUMAN	1169900	1	1	0	1	1	1	1	1169900	1	1	0	3;3;2;2;2;2	3;3;2;2;2;2	3;3;2;2;2;2	sp|P59998|ARPC4_HUMAN Actin-related protein 2/3 complex subunit 4 OS=Homo sapiens GN=ARPC4 PE=1 SV=3;tr|F8WCF6|F8WCF6_HUMAN Protein ARPC4-TTLL3 OS=Homo sapiens GN=ARPC4-TTLL3 PE=1 SV=1;tr|R4GN08|R4GN08_HUMAN Actin-related protein 2/3 complex subunit 4 (Fra	6	3	3	3	0	0	0	0	3	0	1	0	0	0	0	0	3	0	1	0	0	0	0	0	3	0	1	0	16.1	16.1	16.1	19.667
sp|O94776|MTA2_HUMAN;tr|B4DYT9|B4DYT9_HUMAN	sp|O94776|MTA2_HUMAN	1159900	1032300	1	0	1	1	1	1	1159900	1032300	1	0	9;1	8;0	8;0	sp|O94776|MTA2_HUMAN Metastasis-associated protein MTA2 OS=Homo sapiens GN=MTA2 PE=1 SV=1	2	9	8	8	1	0	2	1	5	3	3	3	0	0	1	0	4	2	2	2	0	0	1	0	4	2	2	2	16.3	14.8	14.8	75.022
sp|O43660|PLRG1_HUMAN;tr|H0YA24|H0YA24_HUMAN;tr|D6RA26|D6RA26_HUMAN	sp|O43660|PLRG1_HUMAN;tr|H0YA24|H0YA24_HUMAN	1151400	898200	1	0	1	1	1	1	1151400	898200	1	0	4;2;1	4;2;1	4;2;1	sp|O43660|PLRG1_HUMAN Pleiotropic regulator 1 OS=Homo sapiens GN=PLRG1 PE=1 SV=1;tr|H0YA24|H0YA24_HUMAN Pleiotropic regulator 1 (Fragment) OS=Homo sapiens GN=PLRG1 PE=1 SV=1	3	4	4	4	0	0	1	0	3	2	2	2	0	0	1	0	3	2	2	2	0	0	1	0	3	2	2	2	10.1	10.1	10.1	57.193
sp|Q86U86|PB1_HUMAN;tr|E7EVG2|E7EVG2_HUMAN;tr|H0Y5B5|H0Y5B5_HUMAN;tr|C9JPI5|C9JPI5_HUMAN	sp|Q86U86|PB1_HUMAN;tr|E7EVG2|E7EVG2_HUMAN;tr|H0Y5B5|H0Y5B5_HUMAN	1086000	1	912730	0	1	1	1	1	1086000	1	912730	0	9;7;5;1	9;7;5;1	9;7;5;1	sp|Q86U86|PB1_HUMAN Protein polybromo-1 OS=Homo sapiens GN=PBRM1 PE=1 SV=1;tr|E7EVG2|E7EVG2_HUMAN Protein polybromo-1 (Fragment) OS=Homo sapiens GN=PBRM1 PE=1 SV=5;tr|H0Y5B5|H0Y5B5_HUMAN Protein polybromo-1 (Fragment) OS=Homo sapiens GN=PBRM1 PE=1 SV=1	4	9	9	9	0	0	1	0	2	1	5	3	0	0	1	0	2	1	5	3	0	0	1	0	2	1	5	3	6.2	6.2	6.2	192.95
sp|Q969R5|LMBL2_HUMAN;tr|H0Y5M2|H0Y5M2_HUMAN	sp|Q969R5|LMBL2_HUMAN;tr|H0Y5M2|H0Y5M2_HUMAN	1054100	1	7.17206e-07	0	1	1	1394300	1	1054100	1	1	0	2;1	2;1	2;1	sp|Q969R5|LMBL2_HUMAN Lethal(3)malignant brain tumor-like protein 2 OS=Homo sapiens GN=L3MBTL2 PE=1 SV=1;tr|H0Y5M2|H0Y5M2_HUMAN Lethal(3)malignant brain tumor-like protein 2 (Fragment) OS=Homo sapiens GN=L3MBTL2 PE=1 SV=1	2	2	2	2	0	0	2	1	2	2	2	1	0	0	2	1	2	2	2	1	0	0	2	1	2	2	2	1	3.4	3.4	3.4	79.109
sp|P78527|PRKDC_HUMAN	sp|P78527|PRKDC_HUMAN	1047000	1	1	0	1	1	1	1	1047000	1	1	0	4	4	4	sp|P78527|PRKDC_HUMAN DNA-dependent protein kinase catalytic subunit OS=Homo sapiens GN=PRKDC PE=1 SV=3	1	4	4	4	0	0	1	0	4	0	0	0	0	0	1	0	4	0	0	0	0	0	1	0	4	0	0	0	1.1	1.1	1.1	469.08
sp|Q9P2R3|ANFY1_HUMAN	sp|Q9P2R3|ANFY1_HUMAN	1045800	1	8.33472e-07	0	1	1	1199800	1436900	1045800	1	1	0	3	3	3	sp|Q9P2R3|ANFY1_HUMAN Rabankyrin-5 OS=Homo sapiens GN=ANKFY1 PE=1 SV=2	1	3	3	3	0	0	2	3	2	1	1	1	0	0	2	3	2	1	1	1	0	0	2	3	2	1	1	1	2.4	2.4	2.4	128.4
tr|E9PDU5|E9PDU5_HUMAN;sp|Q9NNW5|WDR6_HUMAN;tr|A0A087X295|A0A087X295_HUMAN;tr|E9PBK6|E9PBK6_HUMAN	tr|E9PDU5|E9PDU5_HUMAN;sp|Q9NNW5|WDR6_HUMAN;tr|A0A087X295|A0A087X295_HUMAN	1044700	882240	1	0	1	1	1	1	1044700	882240	1	0	3;3;3;1	3;3;3;1	3;3;3;1	tr|E9PDU5|E9PDU5_HUMAN WD repeat-containing protein 6 OS=Homo sapiens GN=WDR6 PE=1 SV=1;sp|Q9NNW5|WDR6_HUMAN WD repeat-containing protein 6 OS=Homo sapiens GN=WDR6 PE=1 SV=1;tr|A0A087X295|A0A087X295_HUMAN WD repeat-containing protein 6 OS=Homo sapiens GN=W	4	3	3	3	0	0	0	1	3	2	0	0	0	0	0	1	3	2	0	0	0	0	0	1	3	2	0	0	5.3	5.3	5.3	116.17
tr|H3BSB3|H3BSB3_HUMAN;tr|H3BNT4|H3BNT4_HUMAN;sp|Q99547|MPH6_HUMAN	tr|H3BSB3|H3BSB3_HUMAN;tr|H3BNT4|H3BNT4_HUMAN;sp|Q99547|MPH6_HUMAN	1042800	1	1068900	0	1	1	1	1	1042800	1	1068900	0	3;3;3	3;3;3	3;3;3	tr|H3BSB3|H3BSB3_HUMAN M-phase phosphoprotein 6 OS=Homo sapiens GN=MPHOSPH6 PE=1 SV=1;tr|H3BNT4|H3BNT4_HUMAN M-phase phosphoprotein 6 OS=Homo sapiens GN=MPHOSPH6 PE=1 SV=1;sp|Q99547|MPH6_HUMAN M-phase phosphoprotein 6 OS=Homo sapiens GN=MPHOSPH6 PE=1 SV=2	3	3	3	3	0	0	0	0	2	1	3	1	0	0	0	0	2	1	3	1	0	0	0	0	2	1	3	1	27.5	27.5	27.5	15.489
tr|A0A0A0MTB8|A0A0A0MTB8_HUMAN;sp|Q8NI36|WDR36_HUMAN	tr|A0A0A0MTB8|A0A0A0MTB8_HUMAN;sp|Q8NI36|WDR36_HUMAN	1029600	1	865850	0	1	1	1	1	1029600	1	865850	0	5;5	5;5	5;5	tr|A0A0A0MTB8|A0A0A0MTB8_HUMAN WD repeat-containing protein 36 OS=Homo sapiens GN=WDR36 PE=1 SV=1;sp|Q8NI36|WDR36_HUMAN WD repeat-containing protein 36 OS=Homo sapiens GN=WDR36 PE=1 SV=1	2	5	5	5	0	0	0	0	4	1	3	1	0	0	0	0	4	1	3	1	0	0	0	0	4	1	3	1	7.2	7.2	7.2	99.365
sp|Q14683|SMC1A_HUMAN;tr|H0Y7K8|H0Y7K8_HUMAN;tr|G8JLG1|G8JLG1_HUMAN;tr|V9GYN9|V9GYN9_HUMAN	sp|Q14683|SMC1A_HUMAN;tr|H0Y7K8|H0Y7K8_HUMAN;tr|G8JLG1|G8JLG1_HUMAN	1026200	1	815770	0	1	1	1	1	1026200	1	815770	0	5;4;4;1	5;4;4;1	5;4;4;1	sp|Q14683|SMC1A_HUMAN Structural maintenance of chromosomes protein 1A OS=Homo sapiens GN=SMC1A PE=1 SV=2;tr|H0Y7K8|H0Y7K8_HUMAN Structural maintenance of chromosomes protein 1A (Fragment) OS=Homo sapiens GN=SMC1A PE=1 SV=2;tr|G8JLG1|G8JLG1_HUMAN Structura	4	5	5	5	0	0	0	0	4	0	2	2	0	0	0	0	4	0	2	2	0	0	0	0	4	0	2	2	4	4	4	143.23
tr|Q5VU11|Q5VU11_HUMAN;sp|P78346|RPP30_HUMAN	tr|Q5VU11|Q5VU11_HUMAN;sp|P78346|RPP30_HUMAN	1009400	1	1105300	0	1	1	1	1	1009400	1	1105300	0	2;2	2;2	2;2	tr|Q5VU11|Q5VU11_HUMAN Ribonuclease P protein subunit p30 (Fragment) OS=Homo sapiens GN=RPP30 PE=1 SV=1;sp|P78346|RPP30_HUMAN Ribonuclease P protein subunit p30 OS=Homo sapiens GN=RPP30 PE=1 SV=1	2	2	2	2	0	0	1	1	2	1	2	1	0	0	1	1	2	1	2	1	0	0	1	1	2	1	2	1	9.4	9.4	9.4	28.112
sp|Q9BVI4|NOC4L_HUMAN;tr|F5H303|F5H303_HUMAN	sp|Q9BVI4|NOC4L_HUMAN	1008900	1231700	819610	0	1	1	1	1	1008900	1231700	819610	0	4;1	4;1	4;1	sp|Q9BVI4|NOC4L_HUMAN Nucleolar complex protein 4 homolog OS=Homo sapiens GN=NOC4L PE=1 SV=1	2	4	4	4	0	0	0	1	2	2	4	1	0	0	0	1	2	2	4	1	0	0	0	1	2	2	4	1	9.1	9.1	9.1	58.467
sp|O75152|ZC11A_HUMAN;tr|E9PBY7|E9PBY7_HUMAN;tr|E9PQ61|E9PQ61_HUMAN	sp|O75152|ZC11A_HUMAN;tr|E9PBY7|E9PBY7_HUMAN;tr|E9PQ61|E9PQ61_HUMAN	984350	1	1	0	1	1	1	1	984350	1	1	0	4;2;2	4;2;2	4;2;2	sp|O75152|ZC11A_HUMAN Zinc finger CCCH domain-containing protein 11A OS=Homo sapiens GN=ZC3H11A PE=1 SV=3;tr|E9PBY7|E9PBY7_HUMAN Zinc finger CCCH domain-containing protein 11A (Fragment) OS=Homo sapiens GN=ZC3H11A PE=1 SV=1;tr|E9PQ61|E9PQ61_HUMAN Zinc fing	3	4	4	4	0	0	0	0	3	2	0	1	0	0	0	0	3	2	0	1	0	0	0	0	3	2	0	1	5.9	5.9	5.9	89.13
tr|F5H6E2|F5H6E2_HUMAN;sp|O00159|MYO1C_HUMAN;tr|I3L501|I3L501_HUMAN;tr|I3L3Y6|I3L3Y6_HUMAN;tr|I3L204|I3L204_HUMAN;tr|I3L4D4|I3L4D4_HUMAN	tr|F5H6E2|F5H6E2_HUMAN;sp|O00159|MYO1C_HUMAN	973220	1	1	0	1	1	1	1	973220	1	1	0	9;9;1;1;1;1	9;9;1;1;1;1	9;9;1;1;1;1	tr|F5H6E2|F5H6E2_HUMAN Unconventional myosin-Ic OS=Homo sapiens GN=MYO1C PE=1 SV=1;sp|O00159|MYO1C_HUMAN Unconventional myosin-Ic OS=Homo sapiens GN=MYO1C PE=1 SV=4	6	9	9	9	0	0	0	1	4	2	1	3	0	0	0	1	4	2	1	3	0	0	0	1	4	2	1	3	11	11	11	118.99
sp|Q00610|CLH1_HUMAN;tr|A0A087WVQ6|A0A087WVQ6_HUMAN;tr|J3KS13|J3KS13_HUMAN;tr|A0A087WX41|A0A087WX41_HUMAN;sp|P53675|CLH2_HUMAN	sp|Q00610|CLH1_HUMAN;tr|A0A087WVQ6|A0A087WVQ6_HUMAN;tr|J3KS13|J3KS13_HUMAN	973130	1	1	0	1	1	1	1	973130	1	1	0	4;4;2;1;1	4;4;2;1;1	4;4;2;1;1	sp|Q00610|CLH1_HUMAN Clathrin heavy chain 1 OS=Homo sapiens GN=CLTC PE=1 SV=5;tr|A0A087WVQ6|A0A087WVQ6_HUMAN Clathrin heavy chain OS=Homo sapiens GN=CLTC PE=1 SV=1;tr|J3KS13|J3KS13_HUMAN Clathrin heavy chain 1 OS=Homo sapiens GN=CLTC PE=1 SV=1	5	4	4	4	0	0	0	0	4	0	0	0	0	0	0	0	4	0	0	0	0	0	0	0	4	0	0	0	3.2	3.2	3.2	191.61
tr|A0A0A6YYC3|A0A0A6YYC3_HUMAN;sp|Q9Y383|LC7L2_HUMAN;tr|A0A0A6YYJ8|A0A0A6YYJ8_HUMAN;tr|B8ZZ12|B8ZZ12_HUMAN;tr|A8MYV2|A8MYV2_HUMAN;sp|Q9NQ29|LUC7L_HUMAN	tr|A0A0A6YYC3|A0A0A6YYC3_HUMAN;sp|Q9Y383|LC7L2_HUMAN;tr|A0A0A6YYJ8|A0A0A6YYJ8_HUMAN	972940	1	510650	0	1	1	1	1	972940	1	510650	0	3;3;3;1;1;1	3;3;3;1;1;1	3;3;3;1;1;1	tr|A0A0A6YYC3|A0A0A6YYC3_HUMAN Protein C7orf55-LUC7L2 OS=Homo sapiens GN=C7orf55-LUC7L2 PE=4 SV=1;sp|Q9Y383|LC7L2_HUMAN Putative RNA-binding protein Luc7-like 2 OS=Homo sapiens GN=LUC7L2 PE=1 SV=2;tr|A0A0A6YYJ8|A0A0A6YYJ8_HUMAN Putative RNA-binding protein	6	3	3	3	0	0	1	1	2	1	2	2	0	0	1	1	2	1	2	2	0	0	1	1	2	1	2	2	9.8	9.8	9.8	46.228
sp|Q03252|LMNB2_HUMAN;tr|A8MZF5|A8MZF5_HUMAN	sp|Q03252|LMNB2_HUMAN;tr|A8MZF5|A8MZF5_HUMAN	945110	1	1	0	1	1	1	1	945110	1	1	0	7;7	5;5	5;5	sp|Q03252|LMNB2_HUMAN Lamin-B2 OS=Homo sapiens GN=LMNB2 PE=1 SV=3;tr|A8MZF5|A8MZF5_HUMAN Post-GPI attachment to proteins factor 2 OS=Homo sapiens GN=PGAP2 PE=4 SV=3	2	7	5	5	0	1	2	2	4	2	1	1	0	1	1	1	3	2	1	0	0	1	1	1	3	2	1	0	12.5	9.8	9.8	67.688
sp|O60264|SMCA5_HUMAN;sp|P28370|SMCA1_HUMAN;tr|A0A0A0MRP6|A0A0A0MRP6_HUMAN;tr|B7ZLQ5|B7ZLQ5_HUMAN	sp|O60264|SMCA5_HUMAN	931580	856250	1209100	0	1	1	1	1	931580	856250	1209100	0	5;1;1;1	5;1;1;1	5;1;1;1	sp|O60264|SMCA5_HUMAN SWI/SNF-related matrix-associated actin-dependent regulator of chromatin subfamily A member 5 OS=Homo sapiens GN=SMARCA5 PE=1 SV=1	4	5	5	5	0	0	0	0	3	3	3	1	0	0	0	0	3	3	3	1	0	0	0	0	3	3	3	1	5.1	5.1	5.1	121.9
tr|A0A087WV66|A0A087WV66_HUMAN;sp|P46013|KI67_HUMAN	tr|A0A087WV66|A0A087WV66_HUMAN;sp|P46013|KI67_HUMAN	920970	1	754230	0	1	1	1	1	920970	1	754230	0	4;4	4;4	4;4	tr|A0A087WV66|A0A087WV66_HUMAN Antigen KI-67 OS=Homo sapiens GN=MKI67 PE=1 SV=1;sp|P46013|KI67_HUMAN Antigen KI-67 OS=Homo sapiens GN=MKI67 PE=1 SV=2	2	4	4	4	0	0	0	0	3	1	2	2	0	0	0	0	3	1	2	2	0	0	0	0	3	1	2	2	2.2	2.2	2.2	358.62
REV__tr|H7C485|H7C485_HUMAN;REV__sp|P29374|ARI4A_HUMAN	REV__tr|H7C485|H7C485_HUMAN;REV__sp|P29374|ARI4A_HUMAN	903830	1	1	0	1	1	1	1	903830	1	1	0	1;1	1;1	1;1	tr|H7C485|H7C485_HUMAN AT-rich interactive domain-containing protein 4A (Fragment) OS=Homo sapiens GN=ARID4A PE=1 SV=1;sp|P29374|ARI4A_HUMAN AT-rich interactive domain-containing protein 4A OS=Homo sapiens GN=ARID4A PE=1 SV=3	2	1	1	1	0	0	0	0	1	0	0	0	0	0	0	0	1	0	0	0	0	0	0	0	1	0	0	0	0	0	0	85.322
sp|P04406|G3P_HUMAN	sp|P04406|G3P_HUMAN	884890	904010	0.516905	0	1	1	1286000	1164700	884890	904010	664740	0	4	4	2	sp|P04406|G3P_HUMAN Glyceraldehyde-3-phosphate dehydrogenase OS=Homo sapiens GN=GAPDH PE=1 SV=3	1	4	4	2	0	1	2	2	4	3	2	1	0	1	2	2	4	3	2	1	0	0	1	1	2	1	1	0	14	14	5.4	36.053
tr|C9J295|C9J295_HUMAN;tr|A0A087WZZ9|A0A087WZZ9_HUMAN;tr|E5RIU6|E5RIU6_HUMAN;sp|P06493|CDK1_HUMAN;sp|Q00534|CDK6_HUMAN;sp|P50750|CDK9_HUMAN;tr|E5RGN0|E5RGN0_HUMAN;tr|A0A087X209|A0A087X209_HUMAN;sp|Q96Q40|CDK15_HUMAN;tr|A0A087WZU2|A0A087WZU2_HUMAN;tr|F8VXD2|F8VXD2_HUMAN;tr|G3V5T9|G3V5T9_HUMAN;tr|F5H6Z0|F5H6Z0_HUMAN;sp|Q07002|CDK18_HUMAN;sp|Q00536|CDK16_HUMAN;sp|Q00537|CDK17_HUMAN;tr|J3QSD7|J3QSD7_…	tr|C9J295|C9J295_HUMAN;tr|A0A087WZZ9|A0A087WZZ9_HUMAN;tr|E5RIU6|E5RIU6_HUMAN;sp|P06493|CDK1_HUMAN;sp|Q00534|CDK6_HUMAN;sp|P50750|CDK9_HUMAN;tr|E5RGN0|E5RGN0_HUMAN;tr|A0A087X209|A0A087X209_HUMAN;sp|Q96Q40|CDK15_HUMAN;tr|A0A087WZU2|A0A087WZU2_HUMAN;tr|F8VXD2|F8VXD2_HUMAN;tr|G3V5T9|G3V5T9_HUMAN;tr|F5H6Z0|F5H6Z0_HUMAN;sp|Q07002|CDK18_HUMAN;sp|Q00536|CDK16_HUMAN;sp|Q00537|CDK17_HUMAN;tr|J3QSD7|J3QSD7_…	881430	1	1	0	1	1	1	1	881430	1	1	0	2;2;2;2;1;1;1;1;1;1;1;1;1;1;1;1;1;1;1;1;1;1;1;1;1;1;1;1;1;1;1;1;1;1;1	2;2;2;2;1;1;1;1;1;1;1;1;1;1;1;1;1;1;1;1;1;1;1;1;1;1;1;1;1;1;1;1;1;1;1	2;2;2;2;1;1;1;1;1;1;1;1;1;1;1;1;1;1;1;1;1;1;1;1;1;1;1;1;1;1;1;1;1;1;1	tr|C9J295|C9J295_HUMAN Sialidase-4 (Fragment) OS=Homo sapiens GN=NEU4 PE=4 SV=1;tr|A0A087WZZ9|A0A087WZZ9_HUMAN Cyclin-dependent kinase 1 OS=Homo sapiens GN=CDK1 PE=1 SV=1;tr|E5RIU6|E5RIU6_HUMAN Cyclin-dependent kinase 1 (Fragment) OS=Homo sapiens GN=CDK1 P	35	2	2	2	0	0	0	0	2	0	0	0	0	0	0	0	2	0	0	0	0	0	0	0	2	0	0	0	3.9	3.9	3.9	48.627
tr|E7ESW5|E7ESW5_HUMAN;tr|F8W9U9|F8W9U9_HUMAN;tr|A0A087WW76|A0A087WW76_HUMAN;sp|Q5T5U3|RHG21_HUMAN;tr|H0Y5T2|H0Y5T2_HUMAN	tr|E7ESW5|E7ESW5_HUMAN;tr|F8W9U9|F8W9U9_HUMAN;tr|A0A087WW76|A0A087WW76_HUMAN;sp|Q5T5U3|RHG21_HUMAN	860210	1	1	0	1	1	1	1	860210	1	1	0	4;4;4;4;1	4;4;4;4;1	4;4;4;4;1	tr|E7ESW5|E7ESW5_HUMAN Rho GTPase-activating protein 21 (Fragment) OS=Homo sapiens GN=ARHGAP21 PE=1 SV=1;tr|F8W9U9|F8W9U9_HUMAN Rho GTPase-activating protein 21 (Fragment) OS=Homo sapiens GN=ARHGAP21 PE=1 SV=1;tr|A0A087WW76|A0A087WW76_HUMAN Rho GTPase-acti	5	4	4	4	0	0	0	1	2	1	1	1	0	0	0	1	2	1	1	1	0	0	0	1	2	1	1	1	3.4	3.4	3.4	125.62
tr|A0A0C4DG89|A0A0C4DG89_HUMAN;sp|Q7L014|DDX46_HUMAN;tr|A0A0A0MQS1|A0A0A0MQS1_HUMAN	tr|A0A0C4DG89|A0A0C4DG89_HUMAN;sp|Q7L014|DDX46_HUMAN;tr|A0A0A0MQS1|A0A0A0MQS1_HUMAN	858080	1	1	0	1	1	1	1	858080	1	1	0	4;4;2	4;4;2	4;4;2	tr|A0A0C4DG89|A0A0C4DG89_HUMAN Probable ATP-dependent RNA helicase DDX46 OS=Homo sapiens GN=DDX46 PE=1 SV=1;sp|Q7L014|DDX46_HUMAN Probable ATP-dependent RNA helicase DDX46 OS=Homo sapiens GN=DDX46 PE=1 SV=2;tr|A0A0A0MQS1|A0A0A0MQS1_HUMAN Pyrroline-5-carbox	3	4	4	4	0	0	0	0	3	1	0	1	0	0	0	0	3	1	0	1	0	0	0	0	3	1	0	1	3.9	3.9	3.9	117.46
tr|F8VYE8|F8VYE8_HUMAN;sp|P36873|PP1G_HUMAN;tr|A0A087WYY5|A0A087WYY5_HUMAN;tr|F8VR82|F8VR82_HUMAN;tr|F8W0W8|F8W0W8_HUMAN;tr|E7ETD8|E7ETD8_HUMAN	tr|F8VYE8|F8VYE8_HUMAN;sp|P36873|PP1G_HUMAN;tr|A0A087WYY5|A0A087WYY5_HUMAN;tr|F8VR82|F8VR82_HUMAN;tr|F8W0W8|F8W0W8_HUMAN	797850	1026700	900430	0	1	1	1	1	797850	1026700	900430	0	5;5;4;4;4;2	2;2;2;2;1;0	2;2;2;2;1;0	tr|F8VYE8|F8VYE8_HUMAN Serine/threonine-protein phosphatase OS=Homo sapiens GN=PPP1CC PE=1 SV=1;sp|P36873|PP1G_HUMAN Serine/threonine-protein phosphatase PP1-gamma catalytic subunit OS=Homo sapiens GN=PPP1CC PE=1 SV=1;tr|A0A087WYY5|A0A087WYY5_HUMAN Serine/	6	5	2	2	0	0	2	1	3	3	3	3	0	0	1	0	2	2	2	0	0	0	1	0	2	2	2	0	16.1	7.9	7.9	34.95
sp|Q8NFH3|NUP43_HUMAN	sp|Q8NFH3|NUP43_HUMAN	757040	866320	661950	0	1	1	1	1	757040	866320	661950	0	2	2	2	sp|Q8NFH3|NUP43_HUMAN Nucleoporin Nup43 OS=Homo sapiens GN=NUP43 PE=1 SV=1	1	2	2	2	0	0	0	1	2	2	2	1	0	0	0	1	2	2	2	1	0	0	0	1	2	2	2	1	8.2	8.2	8.2	42.15
sp|Q53F19|CQ085_HUMAN	sp|Q53F19|CQ085_HUMAN	743310	1	540190	0	1	1	1	1	743310	1	540190	0	3	3	3	sp|Q53F19|CQ085_HUMAN Uncharacterized protein C17orf85 OS=Homo sapiens GN=C17orf85 PE=1 SV=2	1	3	3	3	0	0	0	0	2	1	2	2	0	0	0	0	2	1	2	2	0	0	0	0	2	1	2	2	4.8	4.8	4.8	70.592
sp|Q8NE71|ABCF1_HUMAN;tr|H0YGW7|H0YGW7_HUMAN;tr|A0A0G2JIC2|A0A0G2JIC2_HUMAN	sp|Q8NE71|ABCF1_HUMAN;tr|H0YGW7|H0YGW7_HUMAN	729460	1	1	0	1	1	1	1	729460	1	1	0	3;3;1	3;3;1	3;3;1	sp|Q8NE71|ABCF1_HUMAN ATP-binding cassette sub-family F member 1 OS=Homo sapiens GN=ABCF1 PE=1 SV=2;tr|H0YGW7|H0YGW7_HUMAN ATP-binding cassette sub-family F member 1 (Fragment) OS=Homo sapiens GN=ABCF1 PE=1 SV=1	3	3	3	3	0	0	0	0	2	0	2	1	0	0	0	0	2	0	2	1	0	0	0	0	2	0	2	1	4	4	4	95.925
sp|Q93009|UBP7_HUMAN;tr|H3BND8|H3BND8_HUMAN;tr|H3BUV0|H3BUV0_HUMAN;tr|H3BTM1|H3BTM1_HUMAN;tr|H3BRA2|H3BRA2_HUMAN;tr|H3BQD1|H3BQD1_HUMAN;tr|H3BMF6|H3BMF6_HUMAN;tr|F5H2X1|F5H2X1_HUMAN	sp|Q93009|UBP7_HUMAN;tr|H3BND8|H3BND8_HUMAN	717560	1	1	0	1	1	1	1	717560	1	1	0	4;3;1;1;1;1;1;1	4;3;1;1;1;1;1;1	4;3;1;1;1;1;1;1	sp|Q93009|UBP7_HUMAN Ubiquitin carboxyl-terminal hydrolase 7 OS=Homo sapiens GN=USP7 PE=1 SV=2;tr|H3BND8|H3BND8_HUMAN Ubiquitin carboxyl-terminal hydrolase (Fragment) OS=Homo sapiens GN=USP7 PE=1 SV=1	8	4	4	4	0	1	0	1	3	1	1	1	0	1	0	1	3	1	1	1	0	1	0	1	3	1	1	1	4.4	4.4	4.4	128.3
sp|O75940|SPF30_HUMAN	sp|O75940|SPF30_HUMAN	716110	1	606770	0	1	1	1	1	716110	1	606770	0	2	2	2	sp|O75940|SPF30_HUMAN Survival of motor neuron-related-splicing factor 30 OS=Homo sapiens GN=SMNDC1 PE=1 SV=1	1	2	2	2	0	0	0	0	2	1	2	0	0	0	0	0	2	1	2	0	0	0	0	0	2	1	2	0	9.2	9.2	9.2	26.711
tr|J3QLQ6|J3QLQ6_HUMAN;sp|Q9H8H0|NOL11_HUMAN;tr|J3QR28|J3QR28_HUMAN	tr|J3QLQ6|J3QLQ6_HUMAN;sp|Q9H8H0|NOL11_HUMAN	686710	1	1	0	1	1	1	1	686710	1	1	0	3;3;1	3;3;1	3;3;1	tr|J3QLQ6|J3QLQ6_HUMAN Nucleolar protein 11 (Fragment) OS=Homo sapiens GN=NOL11 PE=1 SV=1;sp|Q9H8H0|NOL11_HUMAN Nucleolar protein 11 OS=Homo sapiens GN=NOL11 PE=1 SV=1	3	3	3	3	0	0	0	0	2	1	1	2	0	0	0	0	2	1	1	2	0	0	0	0	2	1	1	2	19.6	19.6	19.6	21.312
sp|O00139|KIF2A_HUMAN;tr|D6R9M0|D6R9M0_HUMAN	sp|O00139|KIF2A_HUMAN	680750	1	1	0	1	1	1	1	680750	1	1	0	4;1	4;1	4;1	sp|O00139|KIF2A_HUMAN Kinesin-like protein KIF2A OS=Homo sapiens GN=KIF2A PE=1 SV=3	2	4	4	4	0	0	0	0	3	0	2	0	0	0	0	0	3	0	2	0	0	0	0	0	3	0	2	0	5.2	5.2	5.2	79.954
sp|P47755|CAZA2_HUMAN;tr|C9JUG7|C9JUG7_HUMAN;tr|F8W9N7|F8W9N7_HUMAN	sp|P47755|CAZA2_HUMAN;tr|C9JUG7|C9JUG7_HUMAN;tr|F8W9N7|F8W9N7_HUMAN	671130	1	1	0	1	1	1	1	671130	1	1	0	4;2;2	2;1;1	2;1;1	sp|P47755|CAZA2_HUMAN F-actin-capping protein subunit alpha-2 OS=Homo sapiens GN=CAPZA2 PE=1 SV=3;tr|C9JUG7|C9JUG7_HUMAN F-actin-capping protein subunit alpha-2 OS=Homo sapiens GN=CAPZA2 PE=1 SV=1;tr|F8W9N7|F8W9N7_HUMAN F-actin-capping protein subunit alph	3	4	2	2	0	0	1	1	3	3	3	1	0	0	0	0	2	1	1	0	0	0	0	0	2	1	1	0	19.6	10.1	10.1	32.949
tr|G3V198|G3V198_HUMAN;sp|Q12769|NU160_HUMAN;tr|E9PSI3|E9PSI3_HUMAN;tr|E9PR16|E9PR16_HUMAN	tr|G3V198|G3V198_HUMAN;sp|Q12769|NU160_HUMAN;tr|E9PSI3|E9PSI3_HUMAN;tr|E9PR16|E9PR16_HUMAN	669450	1	1	0	1	1	1	1	669450	1	1	0	2;2;1;1	2;2;1;1	2;2;1;1	tr|G3V198|G3V198_HUMAN Nuclear pore complex protein Nup160 (Fragment) OS=Homo sapiens GN=NUP160 PE=1 SV=2;sp|Q12769|NU160_HUMAN Nuclear pore complex protein Nup160 OS=Homo sapiens GN=NUP160 PE=1 SV=3;tr|E9PSI3|E9PSI3_HUMAN Nuclear pore complex protein Nup1	4	2	2	2	0	0	0	0	2	0	0	0	0	0	0	0	2	0	0	0	0	0	0	0	2	0	0	0	1.4	1.4	1.4	148.86
sp|Q9NQT4|EXOS5_HUMAN;tr|M0R050|M0R050_HUMAN;tr|M0R102|M0R102_HUMAN	sp|Q9NQT4|EXOS5_HUMAN;tr|M0R050|M0R050_HUMAN	666790	1	1	0	1	1	1	1	666790	1	1	0	4;2;1	4;2;1	4;2;1	sp|Q9NQT4|EXOS5_HUMAN Exosome complex component RRP46 OS=Homo sapiens GN=EXOSC5 PE=1 SV=1;tr|M0R050|M0R050_HUMAN Exosome complex component RRP46 OS=Homo sapiens GN=EXOSC5 PE=1 SV=1	3	4	4	4	1	0	0	0	2	1	1	1	1	0	0	0	2	1	1	1	1	0	0	0	2	1	1	1	17	17	17	25.249
tr|A0A087X0F1|A0A087X0F1_HUMAN;sp|Q9UK61|F208A_HUMAN	tr|A0A087X0F1|A0A087X0F1_HUMAN;sp|Q9UK61|F208A_HUMAN	666210	1	1	0	1	1	1	1	666210	1	1	0	2;2	2;2	2;2	tr|A0A087X0F1|A0A087X0F1_HUMAN Protein FAM208A OS=Homo sapiens GN=FAM208A PE=1 SV=1;sp|Q9UK61|F208A_HUMAN Protein FAM208A OS=Homo sapiens GN=FAM208A PE=1 SV=3	2	2	2	2	0	0	0	0	2	1	1	0	0	0	0	0	2	1	1	0	0	0	0	0	2	1	1	0	2.3	2.3	2.3	117.31
sp|O43172|PRP4_HUMAN	sp|O43172|PRP4_HUMAN	664010	1	627630	0	1	1	1	1	664010	1	627630	0	2	2	2	sp|O43172|PRP4_HUMAN U4/U6 small nuclear ribonucleoprotein Prp4 OS=Homo sapiens GN=PRPF4 PE=1 SV=2	1	2	2	2	0	0	0	1	2	1	2	1	0	0	0	1	2	1	2	1	0	0	0	1	2	1	2	1	5.6	5.6	5.6	58.449
sp|Q86UP3|ZFHX4_HUMAN;tr|E7EVZ1|E7EVZ1_HUMAN;sp|Q15911|ZFHX3_HUMAN;sp|Q9C0A1|ZFHX2_HUMAN	sp|Q86UP3|ZFHX4_HUMAN;tr|E7EVZ1|E7EVZ1_HUMAN;sp|Q15911|ZFHX3_HUMAN	634460	1	591860	0	1	1	1	1	634460	1	591860	0	3;3;2;1	3;3;2;1	3;3;2;1	sp|Q86UP3|ZFHX4_HUMAN Zinc finger homeobox protein 4 OS=Homo sapiens GN=ZFHX4 PE=1 SV=1;tr|E7EVZ1|E7EVZ1_HUMAN Zinc finger homeobox protein 4 OS=Homo sapiens GN=ZFHX4 PE=1 SV=1;sp|Q15911|ZFHX3_HUMAN Zinc finger homeobox protein 3 OS=Homo sapiens GN=ZFHX3 P	4	3	3	3	0	0	1	1	2	1	2	2	0	0	1	1	2	1	2	2	0	0	1	1	2	1	2	2	1	1	1	393.73
sp|Q9NW13|RBM28_HUMAN;tr|C9JAA9|C9JAA9_HUMAN;tr|C9JE21|C9JE21_HUMAN	sp|Q9NW13|RBM28_HUMAN;tr|C9JAA9|C9JAA9_HUMAN	631270	1	710910	0	1	1	1	1	631270	1	710910	0	4;2;1	4;2;1	4;2;1	sp|Q9NW13|RBM28_HUMAN RNA-binding protein 28 OS=Homo sapiens GN=RBM28 PE=1 SV=3;tr|C9JAA9|C9JAA9_HUMAN RNA-binding protein 28 (Fragment) OS=Homo sapiens GN=RBM28 PE=1 SV=1	3	4	4	4	0	0	0	0	2	1	3	2	0	0	0	0	2	1	3	2	0	0	0	0	2	1	3	2	6.2	6.2	6.2	85.737
sp|Q9H2P0|ADNP_HUMAN	sp|Q9H2P0|ADNP_HUMAN	630610	1	622190	0	1	1	1	1	630610	1	622190	0	3	3	3	sp|Q9H2P0|ADNP_HUMAN Activity-dependent neuroprotector homeobox protein OS=Homo sapiens GN=ADNP PE=1 SV=1	1	3	3	3	1	0	0	0	3	1	2	0	1	0	0	0	3	1	2	0	1	0	0	0	3	1	2	0	3.8	3.8	3.8	123.56
sp|O43823|AKAP8_HUMAN;tr|M0QYL4|M0QYL4_HUMAN	sp|O43823|AKAP8_HUMAN	620510	1	929490	0	1	1	1	1	620510	1	929490	0	3;1	3;1	3;1	sp|O43823|AKAP8_HUMAN A-kinase anchor protein 8 OS=Homo sapiens GN=AKAP8 PE=1 SV=1	2	3	3	3	0	0	0	0	2	0	3	0	0	0	0	0	2	0	3	0	0	0	0	0	2	0	3	0	4.6	4.6	4.6	76.107
sp|P12004|PCNA_HUMAN	sp|P12004|PCNA_HUMAN	594260	1	1	0	1	1	1	1	594260	1	1	0	4	4	4	sp|P12004|PCNA_HUMAN Proliferating cell nuclear antigen OS=Homo sapiens GN=PCNA PE=1 SV=1	1	4	4	4	0	0	1	0	2	2	0	0	0	0	1	0	2	2	0	0	0	0	1	0	2	2	0	0	18	18	18	28.768
sp|P49750|YLPM1_HUMAN;tr|F8VU51|F8VU51_HUMAN;tr|H0YIQ2|H0YIQ2_HUMAN	sp|P49750|YLPM1_HUMAN;tr|F8VU51|F8VU51_HUMAN;tr|H0YIQ2|H0YIQ2_HUMAN	593060	1	1	0	1	1	1	1	593060	1	1	0	2;1;1	2;1;1	2;1;1	sp|P49750|YLPM1_HUMAN YLP motif-containing protein 1 OS=Homo sapiens GN=YLPM1 PE=1 SV=3;tr|F8VU51|F8VU51_HUMAN YLP motif-containing protein 1 OS=Homo sapiens GN=YLPM1 PE=1 SV=1;tr|H0YIQ2|H0YIQ2_HUMAN YLP motif-containing protein 1 (Fragment) OS=Homo sapien	3	2	2	2	0	0	0	0	2	0	1	1	0	0	0	0	2	0	1	1	0	0	0	0	2	0	1	1	1.9	1.9	1.9	219.98
sp|Q10570|CPSF1_HUMAN	sp|Q10570|CPSF1_HUMAN	591140	1	1	0	1	1	1	1	591140	1	1	0	2	2	2	sp|Q10570|CPSF1_HUMAN Cleavage and polyadenylation specificity factor subunit 1 OS=Homo sapiens GN=CPSF1 PE=1 SV=2	1	2	2	2	0	0	0	0	2	0	0	1	0	0	0	0	2	0	0	1	0	0	0	0	2	0	0	1	1.9	1.9	1.9	160.88
tr|M0QZM1|M0QZM1_HUMAN	tr|M0QZM1|M0QZM1_HUMAN	573500	1	1	0	1	1	1	1	573500	1	1	0	14	1	1	tr|M0QZM1|M0QZM1_HUMAN Heterogeneous nuclear ribonucleoprotein M (Fragment) OS=Homo sapiens GN=HNRNPM PE=1 SV=1	1	14	1	1	7	10	8	7	13	10	9	10	0	1	0	0	1	0	0	0	0	1	0	0	1	0	0	0	42.8	3.7	3.7	39.933
tr|E9PJ24|E9PJ24_HUMAN;tr|F8WEF5|F8WEF5_HUMAN;sp|Q9P1Y6|PHRF1_HUMAN	tr|E9PJ24|E9PJ24_HUMAN;tr|F8WEF5|F8WEF5_HUMAN;sp|Q9P1Y6|PHRF1_HUMAN	569860	1	1	0	1	1	1	1	569860	1	1	0	2;2;2	2;2;2	2;2;2	tr|E9PJ24|E9PJ24_HUMAN PHD and RING finger domain-containing protein 1 OS=Homo sapiens GN=PHRF1 PE=1 SV=1;tr|F8WEF5|F8WEF5_HUMAN PHD and RING finger domain-containing protein 1 OS=Homo sapiens GN=PHRF1 PE=1 SV=1;sp|Q9P1Y6|PHRF1_HUMAN PHD and RING finger do	3	2	2	2	0	0	0	0	2	0	0	0	0	0	0	0	2	0	0	0	0	0	0	0	2	0	0	0	1.8	1.8	1.8	178.22
sp|Q9UQE7|SMC3_HUMAN	sp|Q9UQE7|SMC3_HUMAN	539810	1	1	0	1	1	1	1	539810	1	1	0	3	3	3	sp|Q9UQE7|SMC3_HUMAN Structural maintenance of chromosomes protein 3 OS=Homo sapiens GN=SMC3 PE=1 SV=2	1	3	3	3	0	0	0	0	2	0	1	2	0	0	0	0	2	0	1	2	0	0	0	0	2	0	1	2	3	3	3	141.54
sp|P49848|TAF6_HUMAN;tr|J3KR72|J3KR72_HUMAN;tr|C9JHQ8|C9JHQ8_HUMAN;tr|F8WEJ7|F8WEJ7_HUMAN;tr|E5RKA5|E5RKA5_HUMAN;tr|C9J7C4|C9J7C4_HUMAN;tr|C9JIS2|C9JIS2_HUMAN;tr|E5RHA1|E5RHA1_HUMAN;tr|C9J088|C9J088_HUMAN;tr|C9JFL8|C9JFL8_HUMAN;tr|C9JTY6|C9JTY6_HUMAN	sp|P49848|TAF6_HUMAN;tr|J3KR72|J3KR72_HUMAN;tr|C9JHQ8|C9JHQ8_HUMAN;tr|F8WEJ7|F8WEJ7_HUMAN;tr|E5RKA5|E5RKA5_HUMAN;tr|C9J7C4|C9J7C4_HUMAN;tr|C9JIS2|C9JIS2_HUMAN;tr|E5RHA1|E5RHA1_HUMAN;tr|C9J088|C9J088_HUMAN;tr|C9JFL8|C9JFL8_HUMAN;tr|C9JTY6|C9JTY6_HUMAN	532840	1	1	0	1	1	1	1	532840	1	1	0	2;2;1;1;1;1;1;1;1;1;1	2;2;1;1;1;1;1;1;1;1;1	2;2;1;1;1;1;1;1;1;1;1	sp|P49848|TAF6_HUMAN Transcription initiation factor TFIID subunit 6 OS=Homo sapiens GN=TAF6 PE=1 SV=1;tr|J3KR72|J3KR72_HUMAN Transcription initiation factor TFIID subunit 6 OS=Homo sapiens GN=TAF6 PE=1 SV=1;tr|C9JHQ8|C9JHQ8_HUMAN Transcription initiation	11	2	2	2	0	0	0	0	2	0	1	1	0	0	0	0	2	0	1	1	0	0	0	0	2	0	1	1	3.5	3.5	3.5	72.668
tr|E7ESD9|E7ESD9_HUMAN;tr|E7EN38|E7EN38_HUMAN;sp|Q92878|RAD50_HUMAN	tr|E7ESD9|E7ESD9_HUMAN;tr|E7EN38|E7EN38_HUMAN;sp|Q92878|RAD50_HUMAN	531330	1	1	0	1	1	1	1	531330	1	1	0	2;2;2	2;2;2	2;2;2	tr|E7ESD9|E7ESD9_HUMAN DNA repair protein RAD50 OS=Homo sapiens GN=RAD50 PE=1 SV=1;tr|E7EN38|E7EN38_HUMAN DNA repair protein RAD50 (Fragment) OS=Homo sapiens GN=RAD50 PE=1 SV=1;sp|Q92878|RAD50_HUMAN DNA repair protein RAD50 OS=Homo sapiens GN=RAD50 PE=1 SV	3	2	2	2	0	0	0	0	2	0	1	0	0	0	0	0	2	0	1	0	0	0	0	0	2	0	1	0	5.1	5.1	5.1	64.053
tr|E7EMC6|E7EMC6_HUMAN;tr|E5RK69|E5RK69_HUMAN;sp|P08133|ANXA6_HUMAN	tr|E7EMC6|E7EMC6_HUMAN;tr|E5RK69|E5RK69_HUMAN;sp|P08133|ANXA6_HUMAN	519700	1	1	0	1	1	1	1	519700	1	1	0	2;2;2	2;2;2	2;2;2	tr|E7EMC6|E7EMC6_HUMAN Annexin OS=Homo sapiens GN=ANXA6 PE=1 SV=1;tr|E5RK69|E5RK69_HUMAN Annexin OS=Homo sapiens GN=ANXA6 PE=1 SV=1;sp|P08133|ANXA6_HUMAN Annexin A6 OS=Homo sapiens GN=ANXA6 PE=1 SV=3	3	2	2	2	0	0	0	0	2	0	0	0	0	0	0	0	2	0	0	0	0	0	0	0	2	0	0	0	7.3	7.3	7.3	36.962
sp|Q14152|EIF3A_HUMAN	sp|Q14152|EIF3A_HUMAN	514210	1	1	0	1	1	1	1	514210	1	1	0	4	4	4	sp|Q14152|EIF3A_HUMAN Eukaryotic translation initiation factor 3 subunit A OS=Homo sapiens GN=EIF3A PE=1 SV=1	1	4	4	4	0	0	0	1	2	1	1	1	0	0	0	1	2	1	1	1	0	0	0	1	2	1	1	1	3.3	3.3	3.3	166.57
sp|Q9Y2L8|ZKSC5_HUMAN	sp|Q9Y2L8|ZKSC5_HUMAN	504910	1	1	0	1	1	1	1	504910	1	1	0	1	1	1	sp|Q9Y2L8|ZKSC5_HUMAN Zinc finger protein with KRAB and SCAN domains 5 OS=Homo sapiens GN=ZKSCAN5 PE=1 SV=1	1	1	1	1	0	0	0	0	1	0	0	0	0	0	0	0	1	0	0	0	0	0	0	0	1	0	0	0	1	1	1	96.902
tr|E9PF10|E9PF10_HUMAN;sp|O75694|NU155_HUMAN	tr|E9PF10|E9PF10_HUMAN;sp|O75694|NU155_HUMAN	485780	1	1	0	1	1	1	1	485780	1	1	0	2;2	2;2	2;2	tr|E9PF10|E9PF10_HUMAN Nuclear pore complex protein Nup155 OS=Homo sapiens GN=NUP155 PE=1 SV=1;sp|O75694|NU155_HUMAN Nuclear pore complex protein Nup155 OS=Homo sapiens GN=NUP155 PE=1 SV=1	2	2	2	2	0	0	0	0	2	0	0	0	0	0	0	0	2	0	0	0	0	0	0	0	2	0	0	0	2.1	2.1	2.1	148.09
sp|Q15750|TAB1_HUMAN	sp|Q15750|TAB1_HUMAN	428150	1	1	0	1	1	1	1	428150	1	1	0	2	2	2	sp|Q15750|TAB1_HUMAN TGF-beta-activated kinase 1 and MAP3K7-binding protein 1 OS=Homo sapiens GN=TAB1 PE=1 SV=1	1	2	2	2	0	0	1	0	2	0	1	1	0	0	1	0	2	0	1	1	0	0	1	0	2	0	1	1	4.2	4.2	4.2	54.643
tr|S4R3H4|S4R3H4_HUMAN;tr|E7EQT4|E7EQT4_HUMAN;sp|Q9UKV3|ACINU_HUMAN;tr|G3V3B0|G3V3B0_HUMAN	tr|S4R3H4|S4R3H4_HUMAN;tr|E7EQT4|E7EQT4_HUMAN;sp|Q9UKV3|ACINU_HUMAN;tr|G3V3B0|G3V3B0_HUMAN	414440	1	1	0	1	1	1	1	414440	1	1	0	4;4;4;3	4;4;4;3	4;4;4;3	tr|S4R3H4|S4R3H4_HUMAN Apoptotic chromatin condensation inducer in the nucleus OS=Homo sapiens GN=ACIN1 PE=1 SV=1;tr|E7EQT4|E7EQT4_HUMAN Apoptotic chromatin condensation inducer in the nucleus OS=Homo sapiens GN=ACIN1 PE=1 SV=2;sp|Q9UKV3|ACINU_HUMAN Apopto	4	4	4	4	0	0	1	0	2	0	1	1	0	0	1	0	2	0	1	1	0	0	1	0	2	0	1	1	3.4	3.4	3.4	145.44
sp|P60228|EIF3E_HUMAN;tr|E5RIT4|E5RIT4_HUMAN;tr|H0YBR5|H0YBR5_HUMAN;tr|E5RGA2|E5RGA2_HUMAN;tr|E5RHS5|E5RHS5_HUMAN	sp|P60228|EIF3E_HUMAN;tr|E5RIT4|E5RIT4_HUMAN;tr|H0YBR5|H0YBR5_HUMAN;tr|E5RGA2|E5RGA2_HUMAN;tr|E5RHS5|E5RHS5_HUMAN	412430	1	1	0	1	1	1	1	412430	1	1	0	2;1;1;1;1	2;1;1;1;1	2;1;1;1;1	sp|P60228|EIF3E_HUMAN Eukaryotic translation initiation factor 3 subunit E OS=Homo sapiens GN=EIF3E PE=1 SV=1;tr|E5RIT4|E5RIT4_HUMAN Eukaryotic translation initiation factor 3 subunit E (Fragment) OS=Homo sapiens GN=EIF3E PE=1 SV=1;tr|H0YBR5|H0YBR5_HUMAN E	5	2	2	2	0	0	0	0	2	0	0	1	0	0	0	0	2	0	0	1	0	0	0	0	2	0	0	1	4.7	4.7	4.7	52.22
sp|Q96N67|DOCK7_HUMAN;tr|H0Y7L2|H0Y7L2_HUMAN;tr|A0A0C4DGY6|A0A0C4DGY6_HUMAN;sp|Q96HP0|DOCK6_HUMAN	sp|Q96N67|DOCK7_HUMAN;tr|H0Y7L2|H0Y7L2_HUMAN	389340	1	1	0	1	1	1	1	389340	1	1	0	3;2;1;1	3;2;1;1	3;2;1;1	sp|Q96N67|DOCK7_HUMAN Dedicator of cytokinesis protein 7 OS=Homo sapiens GN=DOCK7 PE=1 SV=4;tr|H0Y7L2|H0Y7L2_HUMAN Dedicator of cytokinesis protein 7 (Fragment) OS=Homo sapiens GN=DOCK7 PE=1 SV=1	4	3	3	3	0	0	0	0	2	0	1	0	0	0	0	0	2	0	1	0	0	0	0	0	2	0	1	0	1.2	1.2	1.2	242.56
sp|P57740|NU107_HUMAN	sp|P57740|NU107_HUMAN	381220	1	1	0	1	1	1	1	381220	1	1	0	2	2	2	sp|P57740|NU107_HUMAN Nuclear pore complex protein Nup107 OS=Homo sapiens GN=NUP107 PE=1 SV=1	1	2	2	2	0	0	1	0	2	0	1	1	0	0	1	0	2	0	1	1	0	0	1	0	2	0	1	1	2.4	2.4	2.4	106.37
sp|Q8WVC0|LEO1_HUMAN	sp|Q8WVC0|LEO1_HUMAN	363350	1	1	0	1	1	1	1	363350	1	1	0	1	1	1	sp|Q8WVC0|LEO1_HUMAN RNA polymerase-associated protein LEO1 OS=Homo sapiens GN=LEO1 PE=1 SV=1	1	1	1	1	0	0	0	0	1	0	0	0	0	0	0	0	1	0	0	0	0	0	0	0	1	0	0	0	2	2	2	75.403
sp|P78347|GTF2I_HUMAN	sp|P78347|GTF2I_HUMAN	350690	1	1	0	1	1	1	1	350690	1	1	0	1	1	1	sp|P78347|GTF2I_HUMAN General transcription factor II-I OS=Homo sapiens GN=GTF2I PE=1 SV=2	1	1	1	1	0	0	0	0	1	0	0	0	0	0	0	0	1	0	0	0	0	0	0	0	1	0	0	0	1.2	1.2	1.2	112.42
sp|P01605|KV113_HUMAN	sp|P01605|KV113_HUMAN	349080	1	1	0	1	1	1	1	349080	1	1	0	1	1	1	sp|P01605|KV113_HUMAN Ig kappa chain V-I region Lay OS=Homo sapiens PE=1 SV=1	1	1	1	1	0	0	0	0	1	0	0	0	0	0	0	0	1	0	0	0	0	0	0	0	1	0	0	0	16.7	16.7	16.7	11.834
tr|B7ZM99|B7ZM99_HUMAN;tr|A0A0D9SG21|A0A0D9SG21_HUMAN;sp|B2RNN3|C1T9B_HUMAN;tr|U3KQ23|U3KQ23_HUMAN	tr|B7ZM99|B7ZM99_HUMAN;tr|A0A0D9SG21|A0A0D9SG21_HUMAN;sp|B2RNN3|C1T9B_HUMAN;tr|U3KQ23|U3KQ23_HUMAN	293140	1	1	0	1	1	1	1	293140	1	1	0	2;2;2;1	2;2;2;1	2;2;2;1	tr|B7ZM99|B7ZM99_HUMAN MTHFD1L protein OS=Homo sapiens GN=MTHFD1L PE=1 SV=1;tr|A0A0D9SG21|A0A0D9SG21_HUMAN Endothelin B receptor (Fragment) OS=Homo sapiens GN=EDNRB PE=1 SV=1;sp|B2RNN3|C1T9B_HUMAN Complement C1q and tumor necrosis factor-related protein 9B	4	2	2	2	0	0	0	1	1	0	0	0	0	0	0	1	1	0	0	0	0	0	0	1	1	0	0	0	2.6	2.6	2.6	105.89
sp|Q05315|LEG10_HUMAN	sp|Q05315|LEG10_HUMAN	292710	1	1	0	1	1	1	1	292710	1	1	0	1	1	1	sp|Q05315|LEG10_HUMAN Galectin-10 OS=Homo sapiens GN=CLC PE=1 SV=3	1	1	1	1	1	1	1	0	1	0	0	0	1	1	1	0	1	0	0	0	1	1	1	0	1	0	0	0	15.5	15.5	15.5	16.453
sp|Q9BPX5|ARP5L_HUMAN	sp|Q9BPX5|ARP5L_HUMAN	271160	1	1	0	1	1	1	1	271160	1	1	0	1	1	1	sp|Q9BPX5|ARP5L_HUMAN Actin-related protein 2/3 complex subunit 5-like protein OS=Homo sapiens GN=ARPC5L PE=1 SV=1	1	1	1	1	0	0	0	0	1	0	0	0	0	0	0	0	1	0	0	0	0	0	0	0	1	0	0	0	7.8	7.8	7.8	16.941
tr|C9J710|C9J710_HUMAN;tr|C9J966|C9J966_HUMAN;sp|Q8NHQ1|CEP70_HUMAN;tr|C9JZ04|C9JZ04_HUMAN	tr|C9J710|C9J710_HUMAN;tr|C9J966|C9J966_HUMAN;sp|Q8NHQ1|CEP70_HUMAN;tr|C9JZ04|C9JZ04_HUMAN	264710	1	1	0	1	1	1	1	264710	1	1	0	2;2;2;1	2;2;2;1	2;2;2;1	tr|C9J710|C9J710_HUMAN Centrosomal protein of 70 kDa (Fragment) OS=Homo sapiens GN=CEP70 PE=1 SV=1;tr|C9J966|C9J966_HUMAN Centrosomal protein of 70 kDa (Fragment) OS=Homo sapiens GN=CEP70 PE=1 SV=2;sp|Q8NHQ1|CEP70_HUMAN Centrosomal protein of 70 kDa OS=Hom	4	2	2	2	0	0	0	0	1	1	0	0	0	0	0	0	1	1	0	0	0	0	0	0	1	1	0	0	8.1	8.1	8.1	30.693
tr|A0A0A0MRM8|A0A0A0MRM8_HUMAN;tr|A0A0D9SGC1|A0A0D9SGC1_HUMAN;sp|Q9UM54|MYO6_HUMAN;tr|E7EW20|E7EW20_HUMAN	tr|A0A0A0MRM8|A0A0A0MRM8_HUMAN;tr|A0A0D9SGC1|A0A0D9SGC1_HUMAN;sp|Q9UM54|MYO6_HUMAN;tr|E7EW20|E7EW20_HUMAN	249550	1	1	0	1	1	1	1	249550	1	1	0	1;1;1;1	1;1;1;1	1;1;1;1	tr|A0A0A0MRM8|A0A0A0MRM8_HUMAN Unconventional myosin-VI OS=Homo sapiens GN=MYO6 PE=1 SV=1;tr|A0A0D9SGC1|A0A0D9SGC1_HUMAN Unconventional myosin-VI OS=Homo sapiens GN=MYO6 PE=1 SV=1;sp|Q9UM54|MYO6_HUMAN Unconventional myosin-VI OS=Homo sapiens GN=MYO6 PE=1 S	4	1	1	1	0	0	0	0	1	0	0	0	0	0	0	0	1	0	0	0	0	0	0	0	1	0	0	0	1.2	1.2	1.2	145.01
sp|Q8WXF1|PSPC1_HUMAN;tr|X6RDA4|X6RDA4_HUMAN	sp|Q8WXF1|PSPC1_HUMAN;tr|X6RDA4|X6RDA4_HUMAN	242790	1	1	0	1	1	1	1	242790	1	1	0	2;1	2;1	2;1	sp|Q8WXF1|PSPC1_HUMAN Paraspeckle component 1 OS=Homo sapiens GN=PSPC1 PE=1 SV=1;tr|X6RDA4|X6RDA4_HUMAN Paraspeckle component 1 (Fragment) OS=Homo sapiens GN=PSPC1 PE=1 SV=1	2	2	2	2	0	0	0	0	1	0	1	0	0	0	0	0	1	0	1	0	0	0	0	0	1	0	1	0	4.8	4.8	4.8	58.743
tr|A0A0C4DGZ0|A0A0C4DGZ0_HUMAN;sp|P24928|RPB1_HUMAN;tr|A0A087WWE2|A0A087WWE2_HUMAN	tr|A0A0C4DGZ0|A0A0C4DGZ0_HUMAN;sp|P24928|RPB1_HUMAN;tr|A0A087WWE2|A0A087WWE2_HUMAN	232180	1	1	0	1	1	1	1	232180	1	1	0	3;3;3	3;3;3	3;3;3	tr|A0A0C4DGZ0|A0A0C4DGZ0_HUMAN DNA-directed RNA polymerase OS=Homo sapiens GN=POLR2A PE=1 SV=1;sp|P24928|RPB1_HUMAN DNA-directed RNA polymerase II subunit RPB1 OS=Homo sapiens GN=POLR2A PE=1 SV=2;tr|A0A087WWE2|A0A087WWE2_HUMAN DNA-directed RNA polymerase O	3	3	3	3	0	0	0	0	1	0	1	1	0	0	0	0	1	0	1	1	0	0	0	0	1	0	1	1	1.7	1.7	1.7	217.2
sp|Q13151|ROA0_HUMAN	sp|Q13151|ROA0_HUMAN	222300	1	1	0	1	1	1	1	222300	1	1	0	2	2	2	sp|Q13151|ROA0_HUMAN Heterogeneous nuclear ribonucleoprotein A0 OS=Homo sapiens GN=HNRNPA0 PE=1 SV=1	1	2	2	2	0	0	0	0	1	1	0	1	0	0	0	0	1	1	0	1	0	0	0	0	1	1	0	1	11.8	11.8	11.8	30.84
tr|E7EWK3|E7EWK3_HUMAN;sp|Q9H2U1|DHX36_HUMAN;tr|A0A0G2JRP3|A0A0G2JRP3_HUMAN;tr|A0A0G2JQU7|A0A0G2JQU7_HUMAN	tr|E7EWK3|E7EWK3_HUMAN;sp|Q9H2U1|DHX36_HUMAN;tr|A0A0G2JRP3|A0A0G2JRP3_HUMAN;tr|A0A0G2JQU7|A0A0G2JQU7_HUMAN	204280	1	1	0	1	1	1	1	204280	1	1	0	2;2;1;1	2;2;1;1	2;2;1;1	tr|E7EWK3|E7EWK3_HUMAN ATP-dependent RNA helicase DHX36 (Fragment) OS=Homo sapiens GN=DHX36 PE=1 SV=1;sp|Q9H2U1|DHX36_HUMAN ATP-dependent RNA helicase DHX36 OS=Homo sapiens GN=DHX36 PE=1 SV=2;tr|A0A0G2JRP3|A0A0G2JRP3_HUMAN ATP-dependent RNA helicase DHX36	4	2	2	2	0	0	0	0	1	0	0	1	0	0	0	0	1	0	0	1	0	0	0	0	1	0	0	1	3.3	3.3	3.3	91.43
tr|F5H5B7|F5H5B7_HUMAN;tr|F5H1W4|F5H1W4_HUMAN;tr|F5H2K8|F5H2K8_HUMAN;tr|F5H6A8|F5H6A8_HUMAN;tr|F5GXA3|F5GXA3_HUMAN;tr|C9JM38|C9JM38_HUMAN;tr|C9J286|C9J286_HUMAN;tr|C9J323|C9J323_HUMAN;tr|J3QT54|J3QT54_HUMAN;tr|F5H6M0|F5H6M0_HUMAN;tr|F5H047|F5H047_HUMAN;tr|F5H669|F5H669_HUMAN;tr|F5H6P5|F5H6P5_HUMAN;sp|Q8N684|CPSF7_HUMAN	tr|F5H5B7|F5H5B7_HUMAN;tr|F5H1W4|F5H1W4_HUMAN;tr|F5H2K8|F5H2K8_HUMAN;tr|F5H6A8|F5H6A8_HUMAN;tr|F5GXA3|F5GXA3_HUMAN;tr|C9JM38|C9JM38_HUMAN;tr|C9J286|C9J286_HUMAN;tr|C9J323|C9J323_HUMAN;tr|J3QT54|J3QT54_HUMAN;tr|F5H6M0|F5H6M0_HUMAN;tr|F5H047|F5H047_HUMAN;tr|F5H669|F5H669_HUMAN;tr|F5H6P5|F5H6P5_HUMAN;sp|Q8N684|CPSF7_HUMAN	198750	1	1	0	1	1	1	1	198750	1	1	0	1;1;1;1;1;1;1;1;1;1;1;1;1;1	1;1;1;1;1;1;1;1;1;1;1;1;1;1	1;1;1;1;1;1;1;1;1;1;1;1;1;1	tr|F5H5B7|F5H5B7_HUMAN Cleavage and polyadenylation-specificity factor subunit 7 OS=Homo sapiens GN=CPSF7 PE=1 SV=1;tr|F5H1W4|F5H1W4_HUMAN Cleavage and polyadenylation-specificity factor subunit 7 OS=Homo sapiens GN=CPSF7 PE=1 SV=1;tr|F5H2K8|F5H2K8_HUMAN C	14	1	1	1	0	0	0	0	1	0	0	0	0	0	0	0	1	0	0	0	0	0	0	0	1	0	0	0	12.9	12.9	12.9	10.444
sp|P46060|RAGP1_HUMAN;tr|H0Y4Q3|H0Y4Q3_HUMAN	sp|P46060|RAGP1_HUMAN;tr|H0Y4Q3|H0Y4Q3_HUMAN	189750	1	1	0	1	1	1	1	189750	1	1	0	2;1	2;1	2;1	sp|P46060|RAGP1_HUMAN Ran GTPase-activating protein 1 OS=Homo sapiens GN=RANGAP1 PE=1 SV=1;tr|H0Y4Q3|H0Y4Q3_HUMAN Ran GTPase-activating protein 1 (Fragment) OS=Homo sapiens GN=RANGAP1 PE=1 SV=1	2	2	2	2	0	0	0	0	1	0	1	0	0	0	0	0	1	0	1	0	0	0	0	0	1	0	1	0	4.6	4.6	4.6	63.541
tr|A0A087X0P6|A0A087X0P6_HUMAN;tr|A0A075B6S2|A0A075B6S2_HUMAN;tr|A0A0A0MRZ7|A0A0A0MRZ7_HUMAN;tr|A0A0A0MTQ6|A0A0A0MTQ6_HUMAN;tr|A0A087X0Q4|A0A087X0Q4_HUMAN;tr|A0A087WW87|A0A087WW87_HUMAN;tr|A0A075B6R1|A0A075B6R1_HUMAN;sp|P01617|KV204_HUMAN;sp|P01614|KV201_HUMAN;sp|P06309|KV205_HUMAN;tr|A0A075B6S6|A0A075B6S6_HUMAN;tr|A0A075B6S3|A0A075B6S3_HUMAN;sp|P06310|KV206_HUMAN;tr|A0A075B6P5|A0A075B6P5_HUMAN	tr|A0A087X0P6|A0A087X0P6_HUMAN;tr|A0A075B6S2|A0A075B6S2_HUMAN;tr|A0A0A0MRZ7|A0A0A0MRZ7_HUMAN;tr|A0A0A0MTQ6|A0A0A0MTQ6_HUMAN;tr|A0A087X0Q4|A0A087X0Q4_HUMAN;tr|A0A087WW87|A0A087WW87_HUMAN;tr|A0A075B6R1|A0A075B6R1_HUMAN;sp|P01617|KV204_HUMAN;sp|P01614|KV201_HUMAN;sp|P06309|KV205_HUMAN;tr|A0A075B6S6|A0A075B6S6_HUMAN;tr|A0A075B6S3|A0A075B6S3_HUMAN;sp|P06310|KV206_HUMAN;tr|A0A075B6P5|A0A075B6P5_HUMAN	1	1	0.118941	0	1	1	565910000	1	1	1	67310000	0	2;2;2;1;1;1;1;1;1;1;1;1;1;1	2;2;2;1;1;1;1;1;1;1;1;1;1;1	2;2;2;1;1;1;1;1;1;1;1;1;1;1	tr|A0A087X0P6|A0A087X0P6_HUMAN Protein IGKV2D-29 OS=Homo sapiens GN=IGKV2D-29 PE=1 SV=1;tr|A0A075B6S2|A0A075B6S2_HUMAN Protein IGKV2D-29 (Fragment) OS=Homo sapiens GN=IGKV2D-29 PE=1 SV=1;tr|A0A0A0MRZ7|A0A0A0MRZ7_HUMAN Protein IGKV2D-26 (Fragment) OS=Homo s	14	2	2	2	1	1	1	1	2	1	1	1	1	1	1	1	2	1	1	1	1	1	1	1	2	1	1	1	19.6	19.6	19.6	11.192
tr|D6R9E3|D6R9E3_HUMAN	tr|D6R9E3|D6R9E3_HUMAN	1	1	23707000	0	1	1	1	1	1	1	23707000	0	1	1	1	tr|D6R9E3|D6R9E3_HUMAN Meiotic nuclear division protein 1 homolog OS=Homo sapiens GN=MND1 PE=1 SV=1	1	1	1	1	0	0	1	0	0	0	1	0	0	0	1	0	0	0	1	0	0	0	1	0	0	0	1	0	6.7	6.7	6.7	18.983
sp|Q9Y3B9|RRP15_HUMAN	sp|Q9Y3B9|RRP15_HUMAN	1	1881400	4531800	0	1	1	1	1	1	1881400	4531800	0	4	4	4	sp|Q9Y3B9|RRP15_HUMAN RRP15-like protein OS=Homo sapiens GN=RRP15 PE=1 SV=2	1	4	4	4	1	1	1	1	1	2	2	3	1	1	1	1	1	2	2	3	1	1	1	1	1	2	2	3	16.3	16.3	16.3	31.484
tr|J3QLW7|J3QLW7_HUMAN;sp|Q9Y221|NIP7_HUMAN;tr|J3QRD6|J3QRD6_HUMAN;tr|J3QRR4|J3QRR4_HUMAN	tr|J3QLW7|J3QLW7_HUMAN;sp|Q9Y221|NIP7_HUMAN;tr|J3QRD6|J3QRD6_HUMAN;tr|J3QRR4|J3QRR4_HUMAN	1	1	2453800	0	1	1	1	1	1	1	2453800	0	2;2;1;1	2;2;1;1	2;2;1;1	tr|J3QLW7|J3QLW7_HUMAN 60S ribosome subunit biogenesis protein NIP7 homolog OS=Homo sapiens GN=NIP7 PE=1 SV=1;sp|Q9Y221|NIP7_HUMAN 60S ribosome subunit biogenesis protein NIP7 homolog OS=Homo sapiens GN=NIP7 PE=1 SV=1;tr|J3QRD6|J3QRD6_HUMAN 60S ribosome su	4	2	2	2	0	0	0	0	1	1	2	1	0	0	0	0	1	1	2	1	0	0	0	0	1	1	2	1	19.1	19.1	19.1	12.453
sp|Q9BRX2|PELO_HUMAN;tr|Q5STX8|Q5STX8_HUMAN;tr|C9IZE6|C9IZE6_HUMAN;tr|I3L492|I3L492_HUMAN;tr|H3BPL0|H3BPL0_HUMAN	sp|Q9BRX2|PELO_HUMAN;tr|Q5STX8|Q5STX8_HUMAN;tr|C9IZE6|C9IZE6_HUMAN	1	1	1884500	0	1	1	1	1	1	1	1884500	0	5;5;4;2;1	5;5;4;2;1	5;5;4;2;1	sp|Q9BRX2|PELO_HUMAN Protein pelota homolog OS=Homo sapiens GN=PELO PE=1 SV=2;tr|Q5STX8|Q5STX8_HUMAN Allograft inflammatory factor 1 (Fragment) OS=Homo sapiens GN=AIF1 PE=1 SV=1;tr|C9IZE6|C9IZE6_HUMAN Nectin-3 (Fragment) OS=Homo sapiens GN=PVRL3 PE=4 SV=1	5	5	5	5	0	0	1	0	1	1	4	2	0	0	1	0	1	1	4	2	0	0	1	0	1	1	4	2	4.2	4.2	4.2	172.22
REV__tr|J3KSH0|J3KSH0_HUMAN;REV__tr|J3QRG8|J3QRG8_HUMAN;REV__tr|J3KT87|J3KT87_HUMAN;REV__tr|J3QLA7|J3QLA7_HUMAN;REV__tr|J3QLS1|J3QLS1_HUMAN;REV__tr|C9J555|C9J555_HUMAN;REV__tr|J3KSL3|J3KSL3_HUMAN;REV__tr|J3QS10|J3QS10_HUMAN;REV__sp|Q14849|STAR3_HUMAN;REV__tr|J3QLM1|J3QLM1_HUMAN	REV__tr|J3KSH0|J3KSH0_HUMAN;REV__tr|J3QRG8|J3QRG8_HUMAN;REV__tr|J3KT87|J3KT87_HUMAN;REV__tr|J3QLA7|J3QLA7_HUMAN;REV__tr|J3QLS1|J3QLS1_HUMAN;REV__tr|C9J555|C9J555_HUMAN;REV__tr|J3KSL3|J3KSL3_HUMAN;REV__tr|J3QS10|J3QS10_HUMAN;REV__sp|Q14849|STAR3_HUMAN;REV__tr|J3QLM1|J3QLM1_HUMAN	1	1	1794300	0	1	1	1	1	1	1	1794300	0	1;1;1;1;1;1;1;1;1;1	1;1;1;1;1;1;1;1;1;1	1;1;1;1;1;1;1;1;1;1	tr|J3KSH0|J3KSH0_HUMAN StAR-related lipid transfer protein 3 (Fragment) OS=Homo sapiens GN=STARD3 PE=1 SV=1;tr|J3QRG8|J3QRG8_HUMAN StAR-related lipid transfer protein 3 (Fragment) OS=Homo sapiens GN=STARD3 PE=1 SV=5;tr|J3KT87|J3KT87_HUMAN StAR-related lipi	10	1	1	1	0	0	0	0	1	0	1	0	0	0	0	0	1	0	1	0	0	0	0	0	1	0	1	0	0	0	0	12.821
sp|Q15424|SAFB1_HUMAN;sp|Q14151|SAFB2_HUMAN	sp|Q15424|SAFB1_HUMAN;sp|Q14151|SAFB2_HUMAN	1	1190500	1588200	0	1	1	1	1	1	1190500	1588200	0	4;3	4;3	4;3	sp|Q15424|SAFB1_HUMAN Scaffold attachment factor B1 OS=Homo sapiens GN=SAFB PE=1 SV=4;sp|Q14151|SAFB2_HUMAN Scaffold attachment factor B2 OS=Homo sapiens GN=SAFB2 PE=1 SV=1	2	4	4	4	0	0	1	0	1	2	3	2	0	0	1	0	1	2	3	2	0	0	1	0	1	2	3	2	8.6	8.6	8.6	102.64
sp|Q9Y3C6|PPIL1_HUMAN	sp|Q9Y3C6|PPIL1_HUMAN	1	1223800	1442800	0	1	1	1	1	1	1223800	1442800	0	3	3	3	sp|Q9Y3C6|PPIL1_HUMAN Peptidyl-prolyl cis-trans isomerase-like 1 OS=Homo sapiens GN=PPIL1 PE=1 SV=1	1	3	3	3	0	0	1	0	1	3	2	1	0	0	1	0	1	3	2	1	0	0	1	0	1	3	2	1	27.1	27.1	27.1	18.237
tr|B9ZVT1|B9ZVT1_HUMAN;sp|Q8IXT5|RB12B_HUMAN	tr|B9ZVT1|B9ZVT1_HUMAN;sp|Q8IXT5|RB12B_HUMAN	1	1	1287100	0	1	1	1	1	1	1	1287100	0	4;4	4;4	4;4	tr|B9ZVT1|B9ZVT1_HUMAN RNA-binding protein 12B OS=Homo sapiens GN=RBM12B PE=1 SV=2;sp|Q8IXT5|RB12B_HUMAN RNA-binding protein 12B OS=Homo sapiens GN=RBM12B PE=1 SV=2	2	4	4	4	0	0	0	0	1	0	4	1	0	0	0	0	1	0	4	1	0	0	0	0	1	0	4	1	4.4	4.4	4.4	102.7
sp|Q9BXY0|MAK16_HUMAN;tr|H0YBV6|H0YBV6_HUMAN	sp|Q9BXY0|MAK16_HUMAN;tr|H0YBV6|H0YBV6_HUMAN	1	1	1199000	0	1	1	1	1	1	1	1199000	0	4;2	4;2	4;2	sp|Q9BXY0|MAK16_HUMAN Protein MAK16 homolog OS=Homo sapiens GN=MAK16 PE=1 SV=2;tr|H0YBV6|H0YBV6_HUMAN Protein MAK16 homolog (Fragment) OS=Homo sapiens GN=MAK16 PE=1 SV=1	2	4	4	4	0	0	0	0	2	1	3	1	0	0	0	0	2	1	3	1	0	0	0	0	2	1	3	1	16.7	16.7	16.7	35.368
sp|Q9NW64|RBM22_HUMAN;tr|E5RJW4|E5RJW4_HUMAN	sp|Q9NW64|RBM22_HUMAN	1	1	1074600	0	1	1	1	1	1	1	1074600	0	3;1	3;1	3;1	sp|Q9NW64|RBM22_HUMAN Pre-mRNA-splicing factor RBM22 OS=Homo sapiens GN=RBM22 PE=1 SV=1	2	3	3	3	1	1	0	1	2	0	3	1	1	1	0	1	2	0	3	1	1	1	0	1	2	0	3	1	8.8	8.8	8.8	46.895
tr|U3KQC1|U3KQC1_HUMAN;tr|A0A0A0MQU0|A0A0A0MQU0_HUMAN;sp|Q9BV38|WDR18_HUMAN;tr|K7EIR0|K7EIR0_HUMAN;tr|K7EML4|K7EML4_HUMAN	tr|U3KQC1|U3KQC1_HUMAN;tr|A0A0A0MQU0|A0A0A0MQU0_HUMAN;sp|Q9BV38|WDR18_HUMAN;tr|K7EIR0|K7EIR0_HUMAN	1	1	1071700	0	1	1	1	1	1	1	1071700	0	4;4;4;3;1	4;4;4;3;1	4;4;4;3;1	tr|U3KQC1|U3KQC1_HUMAN WD repeat-containing protein 18 (Fragment) OS=Homo sapiens GN=WDR18 PE=1 SV=1;tr|A0A0A0MQU0|A0A0A0MQU0_HUMAN WD repeat-containing protein 18 (Fragment) OS=Homo sapiens GN=WDR18 PE=1 SV=1;sp|Q9BV38|WDR18_HUMAN WD repeat-containing pro	5	4	4	4	0	0	0	1	1	1	3	2	0	0	0	1	1	1	3	2	0	0	0	1	1	1	3	2	10.7	10.7	10.7	43.237
tr|J3KQ96|J3KQ96_HUMAN;tr|E7ETY2|E7ETY2_HUMAN;sp|Q13428|TCOF_HUMAN;tr|H0YA99|H0YA99_HUMAN	tr|J3KQ96|J3KQ96_HUMAN;tr|E7ETY2|E7ETY2_HUMAN;sp|Q13428|TCOF_HUMAN;tr|H0YA99|H0YA99_HUMAN	1	1	1027600	0	1	1	1	1	1	1	1027600	0	2;2;2;1	2;2;2;1	2;2;2;1	tr|J3KQ96|J3KQ96_HUMAN Treacle protein (Fragment) OS=Homo sapiens GN=TCOF1 PE=1 SV=1;tr|E7ETY2|E7ETY2_HUMAN Treacle protein OS=Homo sapiens GN=TCOF1 PE=1 SV=1;sp|Q13428|TCOF_HUMAN Treacle protein OS=Homo sapiens GN=TCOF1 PE=1 SV=3;tr|H0YA99|H0YA99_HUMAN Tr	4	2	2	2	0	0	0	0	1	1	2	1	0	0	0	0	1	1	2	1	0	0	0	0	1	1	2	1	2	2	2	144.12
tr|A0A0A0MRW6|A0A0A0MRW6_HUMAN;sp|Q9H6R4|NOL6_HUMAN	tr|A0A0A0MRW6|A0A0A0MRW6_HUMAN;sp|Q9H6R4|NOL6_HUMAN	1	1	1023500	0	1	1	1	1	1	1	1023500	0	3;3	3;3	3;3	tr|A0A0A0MRW6|A0A0A0MRW6_HUMAN Nucleolar protein 6 OS=Homo sapiens GN=NOL6 PE=1 SV=1;sp|Q9H6R4|NOL6_HUMAN Nucleolar protein 6 OS=Homo sapiens GN=NOL6 PE=1 SV=2	2	3	3	3	0	0	0	0	1	0	2	2	0	0	0	0	1	0	2	2	0	0	0	0	1	0	2	2	3.5	3.5	3.5	112.16
tr|K7ENA3|K7ENA3_HUMAN;tr|K7EIN2|K7EIN2_HUMAN;sp|Q9BRJ7|SDOS_HUMAN;tr|A0A0G2JL33|A0A0G2JL33_HUMAN	tr|K7ENA3|K7ENA3_HUMAN;tr|K7EIN2|K7EIN2_HUMAN;sp|Q9BRJ7|SDOS_HUMAN;tr|A0A0G2JL33|A0A0G2JL33_HUMAN	1	1	926040	0	1	1	1	1	1	1	926040	0	3;3;3;2	3;3;3;2	3;3;3;2	tr|K7ENA3|K7ENA3_HUMAN Protein syndesmos OS=Homo sapiens GN=NUDT16L1 PE=1 SV=1;tr|K7EIN2|K7EIN2_HUMAN Protein syndesmos (Fragment) OS=Homo sapiens GN=NUDT16L1 PE=1 SV=1;sp|Q9BRJ7|SDOS_HUMAN Protein syndesmos OS=Homo sapiens GN=NUDT16L1 PE=1 SV=1;tr|A0A0G2J	4	3	3	3	0	0	1	0	2	0	2	2	0	0	1	0	2	0	2	2	0	0	1	0	2	0	2	2	21.1	21.1	21.1	18.944
sp|Q8N726|ARF_HUMAN;tr|A0A0A0MRI0|A0A0A0MRI0_HUMAN	sp|Q8N726|ARF_HUMAN;tr|A0A0A0MRI0|A0A0A0MRI0_HUMAN	1	1	830640	0	1	1	1	1	1	1	830640	0	2;2	2;2	2;2	sp|Q8N726|ARF_HUMAN Tumor suppressor ARF OS=Homo sapiens GN=CDKN2A PE=1 SV=2;tr|A0A0A0MRI0|A0A0A0MRI0_HUMAN Cyclin-dependent kinase inhibitor 2A OS=Homo sapiens GN=CDKN2A PE=1 SV=1	2	2	2	2	1	0	1	0	1	0	1	1	1	0	1	0	1	0	1	1	1	0	1	0	1	0	1	1	12.1	12.1	12.1	13.903
sp|O15294|OGT1_HUMAN	sp|O15294|OGT1_HUMAN	1	1	814990	0	1	1	1	1	1	1	814990	0	2	2	2	sp|O15294|OGT1_HUMAN UDP-N-acetylglucosamine--peptide N-acetylglucosaminyltransferase 110 kDa subunit OS=Homo sapiens GN=OGT PE=1 SV=3	1	2	2	2	0	0	0	0	1	0	2	0	0	0	0	0	1	0	2	0	0	0	0	0	1	0	2	0	1.8	1.8	1.8	116.92
tr|H7BXY3|H7BXY3_HUMAN;sp|Q7L2E3|DHX30_HUMAN	tr|H7BXY3|H7BXY3_HUMAN;sp|Q7L2E3|DHX30_HUMAN	1	1	806760	0	1	1	1	1	1	1	806760	0	3;3	3;3	3;3	tr|H7BXY3|H7BXY3_HUMAN Putative ATP-dependent RNA helicase DHX30 OS=Homo sapiens GN=DHX30 PE=1 SV=1;sp|Q7L2E3|DHX30_HUMAN Putative ATP-dependent RNA helicase DHX30 OS=Homo sapiens GN=DHX30 PE=1 SV=1	2	3	3	3	0	0	0	0	1	0	3	1	0	0	0	0	1	0	3	1	0	0	0	0	1	0	3	1	2.5	2.5	2.5	130.55
tr|K7EJM7|K7EJM7_HUMAN;tr|M0R2N4|M0R2N4_HUMAN;sp|Q8WU68|U2AF4_HUMAN;sp|Q01081|U2AF1_HUMAN;tr|K7EJH3|K7EJH3_HUMAN;tr|M0QYK5|M0QYK5_HUMAN	tr|K7EJM7|K7EJM7_HUMAN;tr|M0R2N4|M0R2N4_HUMAN;sp|Q8WU68|U2AF4_HUMAN;sp|Q01081|U2AF1_HUMAN;tr|K7EJH3|K7EJH3_HUMAN;tr|M0QYK5|M0QYK5_HUMAN	1	1	793320	0	1	1	1	1	1	1	793320	0	2;2;2;2;2;2	2;2;2;2;2;2	2;2;2;2;2;2	tr|K7EJM7|K7EJM7_HUMAN Splicing factor U2AF 26 kDa subunit OS=Homo sapiens GN=U2AF1L4 PE=4 SV=1;tr|M0R2N4|M0R2N4_HUMAN Uncharacterized protein OS=Homo sapiens PE=4 SV=1;sp|Q8WU68|U2AF4_HUMAN Splicing factor U2AF 26 kDa subunit OS=Homo sapiens GN=U2AF1L4 PE	6	2	2	2	0	1	1	1	1	1	1	1	0	1	1	1	1	1	1	1	0	1	1	1	1	1	1	1	27.5	27.5	27.5	5.4811
tr|H0YHW2|H0YHW2_HUMAN;tr|H0YIF4|H0YIF4_HUMAN;tr|F8VSE7|F8VSE7_HUMAN;sp|Q96AV8|E2F7_HUMAN	tr|H0YHW2|H0YHW2_HUMAN;tr|H0YIF4|H0YIF4_HUMAN;tr|F8VSE7|F8VSE7_HUMAN;sp|Q96AV8|E2F7_HUMAN	1	1	746110	0	1	1	1	1	1	1	746110	0	2;2;2;2	2;2;2;2	2;2;2;2	tr|H0YHW2|H0YHW2_HUMAN Transcription factor E2F7 (Fragment) OS=Homo sapiens GN=E2F7 PE=1 SV=1;tr|H0YIF4|H0YIF4_HUMAN Transcription factor E2F7 (Fragment) OS=Homo sapiens GN=E2F7 PE=1 SV=1;tr|F8VSE7|F8VSE7_HUMAN Transcription factor E2F7 (Fragment) OS=Homo	4	2	2	2	0	0	0	0	1	0	2	1	0	0	0	0	1	0	2	1	0	0	0	0	1	0	2	1	14.9	14.9	14.9	24.092
tr|H3BV80|H3BV80_HUMAN;tr|H3BMS0|H3BMS0_HUMAN;tr|H3BMM9|H3BMM9_HUMAN;tr|H3BTC0|H3BTC0_HUMAN;sp|Q15287|RNPS1_HUMAN;tr|Q5TEE8|Q5TEE8_HUMAN	tr|H3BV80|H3BV80_HUMAN;tr|H3BMS0|H3BMS0_HUMAN;tr|H3BMM9|H3BMM9_HUMAN;tr|H3BTC0|H3BTC0_HUMAN;sp|Q15287|RNPS1_HUMAN;tr|Q5TEE8|Q5TEE8_HUMAN	1	1	721000	0	1	1	1	1	1	1	721000	0	2;2;2;2;2;2	2;2;2;2;2;2	2;2;2;2;2;2	tr|H3BV80|H3BV80_HUMAN RNA-binding protein with serine-rich domain 1 OS=Homo sapiens GN=RNPS1 PE=1 SV=2;tr|H3BMS0|H3BMS0_HUMAN RNA-binding protein with serine-rich domain 1 OS=Homo sapiens GN=RNPS1 PE=1 SV=1;tr|H3BMM9|H3BMM9_HUMAN RNA-binding protein with	6	2	2	2	0	0	1	1	1	1	2	1	0	0	1	1	1	1	2	1	0	0	1	1	1	1	2	1	10.9	10.9	10.9	24.561
sp|O15371|EIF3D_HUMAN;tr|B0QYA4|B0QYA4_HUMAN;tr|B0QYA5|B0QYA5_HUMAN	sp|O15371|EIF3D_HUMAN;tr|B0QYA4|B0QYA4_HUMAN;tr|B0QYA5|B0QYA5_HUMAN	1	1	661210	0	1	1	1	1	1	1	661210	0	2;1;1	2;1;1	2;1;1	sp|O15371|EIF3D_HUMAN Eukaryotic translation initiation factor 3 subunit D OS=Homo sapiens GN=EIF3D PE=1 SV=1;tr|B0QYA4|B0QYA4_HUMAN Eukaryotic translation initiation factor 3 subunit D (Fragment) OS=Homo sapiens GN=EIF3D PE=1 SV=2;tr|B0QYA5|B0QYA5_HUMAN E	3	2	2	2	0	0	0	0	0	1	2	1	0	0	0	0	0	1	2	1	0	0	0	0	0	1	2	1	4.4	4.4	4.4	63.972
sp|Q5W0B1|RN219_HUMAN	sp|Q5W0B1|RN219_HUMAN	1	1	647270	0	1	1	1	1	1	1	647270	0	3	3	3	sp|Q5W0B1|RN219_HUMAN RING finger protein 219 OS=Homo sapiens GN=RNF219 PE=1 SV=1	1	3	3	3	0	0	0	1	1	1	3	1	0	0	0	1	1	1	3	1	0	0	0	1	1	1	3	1	5	5	5	81.116
sp|P62140|PP1B_HUMAN;tr|C9J9S3|C9J9S3_HUMAN;tr|C9JP48|C9JP48_HUMAN	sp|P62140|PP1B_HUMAN;tr|C9J9S3|C9J9S3_HUMAN;tr|C9JP48|C9JP48_HUMAN	1	1	644130	0	1	1	1	1	1	1	644130	0	5;4;4	2;2;2	2;2;2	sp|P62140|PP1B_HUMAN Serine/threonine-protein phosphatase PP1-beta catalytic subunit OS=Homo sapiens GN=PPP1CB PE=1 SV=3;tr|C9J9S3|C9J9S3_HUMAN Serine/threonine-protein phosphatase (Fragment) OS=Homo sapiens GN=PPP1CB PE=1 SV=1;tr|C9JP48|C9JP48_HUMAN Serin	3	5	2	2	0	1	1	1	2	2	3	4	0	1	0	0	1	1	2	1	0	1	0	0	1	1	2	1	14.7	7	7	37.186
tr|D6RCK3|D6RCK3_HUMAN;sp|Q9H8S9|MOB1A_HUMAN;sp|Q7L9L4|MOB1B_HUMAN	tr|D6RCK3|D6RCK3_HUMAN;sp|Q9H8S9|MOB1A_HUMAN;sp|Q7L9L4|MOB1B_HUMAN	1	1	621570	0	1	1	1	1	1	1	621570	0	2;2;2	2;2;2	2;2;2	tr|D6RCK3|D6RCK3_HUMAN MOB kinase activator 1B (Fragment) OS=Homo sapiens GN=MOB1B PE=4 SV=1;sp|Q9H8S9|MOB1A_HUMAN MOB kinase activator 1A OS=Homo sapiens GN=MOB1A PE=1 SV=4;sp|Q7L9L4|MOB1B_HUMAN MOB kinase activator 1B OS=Homo sapiens GN=MOB1B PE=1 SV=3	3	2	2	2	0	0	0	0	1	1	2	0	0	0	0	0	1	1	2	0	0	0	0	0	1	1	2	0	20	20	20	14.631
sp|Q5SWX8|ODR4_HUMAN	sp|Q5SWX8|ODR4_HUMAN	1	1	621090	0	1	1	1	1	1	1	621090	0	2	2	2	sp|Q5SWX8|ODR4_HUMAN Protein odr-4 homolog OS=Homo sapiens GN=ODR4 PE=1 SV=1	1	2	2	2	0	0	0	0	1	1	2	1	0	0	0	0	1	1	2	1	0	0	0	0	1	1	2	1	4.6	4.6	4.6	51.103
sp|O95400|CD2B2_HUMAN	sp|O95400|CD2B2_HUMAN	1	1	616850	0	1	1	1	1	1	1	616850	0	2	2	2	sp|O95400|CD2B2_HUMAN CD2 antigen cytoplasmic tail-binding protein 2 OS=Homo sapiens GN=CD2BP2 PE=1 SV=1	1	2	2	2	0	0	1	1	1	1	2	1	0	0	1	1	1	1	2	1	0	0	1	1	1	1	2	1	10	10	10	37.646
sp|P11388|TOP2A_HUMAN	sp|P11388|TOP2A_HUMAN	1	1	581950	0	1	1	1	1	1	1	581950	0	2	2	2	sp|P11388|TOP2A_HUMAN DNA topoisomerase 2-alpha OS=Homo sapiens GN=TOP2A PE=1 SV=3	1	2	2	2	0	0	0	0	1	1	2	1	0	0	0	0	1	1	2	1	0	0	0	0	1	1	2	1	1.5	1.5	1.5	174.38
sp|Q96QD9|UIF_HUMAN;tr|H9KVD5|H9KVD5_HUMAN;tr|H9KVD1|H9KVD1_HUMAN	sp|Q96QD9|UIF_HUMAN	1	1	550970	0	1	1	1	1	1	1	550970	0	3;1;1	3;1;1	3;1;1	sp|Q96QD9|UIF_HUMAN UAP56-interacting factor OS=Homo sapiens GN=FYTTD1 PE=1 SV=3	3	3	3	3	0	0	0	1	1	1	2	1	0	0	0	1	1	1	2	1	0	0	0	1	1	1	2	1	10.4	10.4	10.4	35.818
sp|Q9HCS7|SYF1_HUMAN	sp|Q9HCS7|SYF1_HUMAN	1	1	522590	0	1	1	1	1	1	1	522590	0	2	2	2	sp|Q9HCS7|SYF1_HUMAN Pre-mRNA-splicing factor SYF1 OS=Homo sapiens GN=XAB2 PE=1 SV=2	1	2	2	2	0	0	0	0	0	0	2	1	0	0	0	0	0	0	2	1	0	0	0	0	0	0	2	1	2.5	2.5	2.5	100.01
sp|P62487|RPB7_HUMAN	sp|P62487|RPB7_HUMAN	1	1	519110	0	1	1	1	1	1	1	519110	0	2	2	2	sp|P62487|RPB7_HUMAN DNA-directed RNA polymerase II subunit RPB7 OS=Homo sapiens GN=POLR2G PE=1 SV=1	1	2	2	2	0	0	0	1	1	1	2	1	0	0	0	1	1	1	2	1	0	0	0	1	1	1	2	1	12.2	12.2	12.2	19.294
sp|P17987|TCPA_HUMAN;tr|E7ERF2|E7ERF2_HUMAN;tr|F5H7Y1|F5H7Y1_HUMAN;tr|F5GZI8|F5GZI8_HUMAN;tr|F5H136|F5H136_HUMAN;tr|F5GYL4|F5GYL4_HUMAN;tr|F5H282|F5H282_HUMAN;tr|E7EQR6|E7EQR6_HUMAN	sp|P17987|TCPA_HUMAN;tr|E7ERF2|E7ERF2_HUMAN	1	1	513310	0	1	1	1	1	1	1	513310	0	3;2;1;1;1;1;1;1	3;2;1;1;1;1;1;1	3;2;1;1;1;1;1;1	sp|P17987|TCPA_HUMAN T-complex protein 1 subunit alpha OS=Homo sapiens GN=TCP1 PE=1 SV=1;tr|E7ERF2|E7ERF2_HUMAN T-complex protein 1 subunit alpha OS=Homo sapiens GN=TCP1 PE=1 SV=1	8	3	3	3	0	0	0	0	1	0	2	0	0	0	0	0	1	0	2	0	0	0	0	0	1	0	2	0	7.4	7.4	7.4	60.343
sp|Q9NVN8|GNL3L_HUMAN	sp|Q9NVN8|GNL3L_HUMAN	1	1	504150	0	1	1	1	1	1	1	504150	0	2	2	2	sp|Q9NVN8|GNL3L_HUMAN Guanine nucleotide-binding protein-like 3-like protein OS=Homo sapiens GN=GNL3L PE=1 SV=1	1	2	2	2	0	0	0	0	1	0	1	1	0	0	0	0	1	0	1	1	0	0	0	0	1	0	1	1	5	5	5	65.572
sp|Q9NWU2|GID8_HUMAN	sp|Q9NWU2|GID8_HUMAN	1	1	497050	0	1	1	1	1	1	1	497050	0	2	2	2	sp|Q9NWU2|GID8_HUMAN Glucose-induced degradation protein 8 homolog OS=Homo sapiens GN=GID8 PE=1 SV=1	1	2	2	2	0	0	0	0	1	0	2	0	0	0	0	0	1	0	2	0	0	0	0	0	1	0	2	0	9.2	9.2	9.2	26.748
sp|O15213|WDR46_HUMAN;tr|H0Y6G3|H0Y6G3_HUMAN;tr|A0A0G2JJL1|A0A0G2JJL1_HUMAN	sp|O15213|WDR46_HUMAN;tr|H0Y6G3|H0Y6G3_HUMAN;tr|A0A0G2JJL1|A0A0G2JJL1_HUMAN	1	1	487920	0	1	1	1	1	1	1	487920	0	2;1;1	2;1;1	2;1;1	sp|O15213|WDR46_HUMAN WD repeat-containing protein 46 OS=Homo sapiens GN=WDR46 PE=1 SV=3;tr|H0Y6G3|H0Y6G3_HUMAN WD repeat-containing protein 46 (Fragment) OS=Homo sapiens GN=WDR46 PE=1 SV=1;tr|A0A0G2JJL1|A0A0G2JJL1_HUMAN WD repeat-containing protein 46 (Fr	3	2	2	2	0	0	0	0	0	0	2	1	0	0	0	0	0	0	2	1	0	0	0	0	0	0	2	1	4.8	4.8	4.8	68.07
sp|Q5C9Z4|NOM1_HUMAN	sp|Q5C9Z4|NOM1_HUMAN	1	1	487060	0	1	1	1	1	1	1	487060	0	3	3	3	sp|Q5C9Z4|NOM1_HUMAN Nucleolar MIF4G domain-containing protein 1 OS=Homo sapiens GN=NOM1 PE=1 SV=1	1	3	3	3	0	0	0	0	1	1	2	1	0	0	0	0	1	1	2	1	0	0	0	0	1	1	2	1	4.5	4.5	4.5	96.256
sp|Q9P0M6|H2AW_HUMAN;tr|Q5SQT3|Q5SQT3_HUMAN	sp|Q9P0M6|H2AW_HUMAN;tr|Q5SQT3|Q5SQT3_HUMAN	1	1	477180	0	1	1	1	1	1	1	477180	0	2;1	2;1	2;1	sp|Q9P0M6|H2AW_HUMAN Core histone macro-H2A.2 OS=Homo sapiens GN=H2AFY2 PE=1 SV=3;tr|Q5SQT3|Q5SQT3_HUMAN Histone H2A (Fragment) OS=Homo sapiens GN=H2AFY2 PE=1 SV=5	2	2	2	2	0	0	0	0	1	0	2	1	0	0	0	0	1	0	2	1	0	0	0	0	1	0	2	1	7.3	7.3	7.3	40.058
sp|Q68D10|SPT2_HUMAN	sp|Q68D10|SPT2_HUMAN	1	1	464880	0	1	1	1	1	1	1	464880	0	2	2	2	sp|Q68D10|SPT2_HUMAN Protein SPT2 homolog OS=Homo sapiens GN=SPTY2D1 PE=1 SV=3	1	2	2	2	0	0	0	0	0	0	2	0	0	0	0	0	0	0	2	0	0	0	0	0	0	0	2	0	3.2	3.2	3.2	75.598
sp|O43670|ZN207_HUMAN;tr|J3QRS9|J3QRS9_HUMAN;tr|X6R4W8|X6R4W8_HUMAN;tr|J3QS27|J3QS27_HUMAN;tr|J3KTL1|J3KTL1_HUMAN;tr|J3KRB6|J3KRB6_HUMAN;tr|J3KRW6|J3KRW6_HUMAN;tr|H0Y3M2|H0Y3M2_HUMAN;tr|J3KS31|J3KS31_HUMAN	sp|O43670|ZN207_HUMAN;tr|J3QRS9|J3QRS9_HUMAN;tr|X6R4W8|X6R4W8_HUMAN;tr|J3QS27|J3QS27_HUMAN;tr|J3KTL1|J3KTL1_HUMAN;tr|J3KRB6|J3KRB6_HUMAN;tr|J3KRW6|J3KRW6_HUMAN;tr|H0Y3M2|H0Y3M2_HUMAN;tr|J3KS31|J3KS31_HUMAN	1	1	452100	0	1	1	1	1	1	1	452100	0	2;2;2;1;1;1;1;1;1	2;2;2;1;1;1;1;1;1	2;2;2;1;1;1;1;1;1	sp|O43670|ZN207_HUMAN BUB3-interacting and GLEBS motif-containing protein ZNF207 OS=Homo sapiens GN=ZNF207 PE=1 SV=1;tr|J3QRS9|J3QRS9_HUMAN BUB3-interacting and GLEBS motif-containing protein ZNF207 OS=Homo sapiens GN=ZNF207 PE=1 SV=1;tr|X6R4W8|X6R4W8_HUMA	9	2	2	2	0	0	0	0	1	0	2	1	0	0	0	0	1	0	2	1	0	0	0	0	1	0	2	1	5.4	5.4	5.4	50.75
sp|P62826|RAN_HUMAN;tr|B5MDF5|B5MDF5_HUMAN;tr|J3KQE5|J3KQE5_HUMAN;tr|H0YFC6|H0YFC6_HUMAN;tr|F5H018|F5H018_HUMAN;tr|B4DV51|B4DV51_HUMAN	sp|P62826|RAN_HUMAN;tr|B5MDF5|B5MDF5_HUMAN;tr|J3KQE5|J3KQE5_HUMAN;tr|H0YFC6|H0YFC6_HUMAN;tr|F5H018|F5H018_HUMAN	1	1.05148e-06	0.472373	0	1	951040	949630	870430	1	1	448580	0	3;3;3;2;2;1	3;3;3;2;2;1	3;3;3;2;2;1	sp|P62826|RAN_HUMAN GTP-binding nuclear protein Ran OS=Homo sapiens GN=RAN PE=1 SV=3;tr|B5MDF5|B5MDF5_HUMAN GTP-binding nuclear protein Ran OS=Homo sapiens GN=RAN PE=1 SV=1;tr|J3KQE5|J3KQE5_HUMAN GTP-binding nuclear protein Ran (Fragment) OS=Homo sapiens G	6	3	3	3	1	2	2	2	2	2	2	1	1	2	2	2	2	2	2	1	1	2	2	2	2	2	2	1	14.8	14.8	14.8	24.423
sp|Q4G0J3|LARP7_HUMAN;tr|D6R9Z6|D6R9Z6_HUMAN;tr|D6RFF0|D6RFF0_HUMAN;tr|H0YA82|H0YA82_HUMAN	sp|Q4G0J3|LARP7_HUMAN;tr|D6R9Z6|D6R9Z6_HUMAN;tr|D6RFF0|D6RFF0_HUMAN;tr|H0YA82|H0YA82_HUMAN	1	1	437100	0	1	1	1	1	1	1	437100	0	2;1;1;1	2;1;1;1	2;1;1;1	sp|Q4G0J3|LARP7_HUMAN La-related protein 7 OS=Homo sapiens GN=LARP7 PE=1 SV=1;tr|D6R9Z6|D6R9Z6_HUMAN La-related protein 7 (Fragment) OS=Homo sapiens GN=LARP7 PE=1 SV=1;tr|D6RFF0|D6RFF0_HUMAN La-related protein 7 (Fragment) OS=Homo sapiens GN=LARP7 PE=1 SV=	4	2	2	2	0	0	0	0	0	0	2	1	0	0	0	0	0	0	2	1	0	0	0	0	0	0	2	1	5	5	5	66.898
sp|Q9H9Y2|RPF1_HUMAN	sp|Q9H9Y2|RPF1_HUMAN	1	1	427550	0	1	1	1	1	1	1	427550	0	2	2	2	sp|Q9H9Y2|RPF1_HUMAN Ribosome production factor 1 OS=Homo sapiens GN=RPF1 PE=1 SV=2	1	2	2	2	0	0	0	0	0	1	1	1	0	0	0	0	0	1	1	1	0	0	0	0	0	1	1	1	6.3	6.3	6.3	40.11
sp|Q53HL2|BOREA_HUMAN	sp|Q53HL2|BOREA_HUMAN	1	1	420890	0	1	1	1	1	1	1	420890	0	2	2	2	sp|Q53HL2|BOREA_HUMAN Borealin OS=Homo sapiens GN=CDCA8 PE=1 SV=2	1	2	2	2	0	0	0	0	0	0	2	1	0	0	0	0	0	0	2	1	0	0	0	0	0	0	2	1	10.7	10.7	10.7	31.323
sp|Q9ULT0|TTC7A_HUMAN;tr|F1T0D4|F1T0D4_HUMAN;tr|H7C055|H7C055_HUMAN;tr|H0Y3V7|H0Y3V7_HUMAN	sp|Q9ULT0|TTC7A_HUMAN;tr|F1T0D4|F1T0D4_HUMAN;tr|H7C055|H7C055_HUMAN	1	1	419790	0	1	1	1	1	1	1	419790	0	3;3;2;1	3;3;2;1	3;3;2;1	sp|Q9ULT0|TTC7A_HUMAN Tetratricopeptide repeat protein 7A OS=Homo sapiens GN=TTC7A PE=1 SV=3;tr|F1T0D4|F1T0D4_HUMAN Amino acid transporter OS=Homo sapiens GN=SLC1A7 PE=2 SV=1;tr|H7C055|H7C055_HUMAN Tetratricopeptide repeat protein 7A (Fragment) OS=Homo sap	4	3	3	3	0	0	0	0	2	1	2	1	0	0	0	0	2	1	2	1	0	0	0	0	2	1	2	1	3.6	3.6	3.6	96.184
sp|Q9NY61|AATF_HUMAN	sp|Q9NY61|AATF_HUMAN	1	1	413860	0	1	1	1	1	1	1	413860	0	1	1	1	sp|Q9NY61|AATF_HUMAN Protein AATF OS=Homo sapiens GN=AATF PE=1 SV=1	1	1	1	1	0	0	0	0	0	0	1	0	0	0	0	0	0	0	1	0	0	0	0	0	0	0	1	0	1.3	1.3	1.3	119.18
sp|P14373|TRI27_HUMAN;tr|H0Y551|H0Y551_HUMAN	sp|P14373|TRI27_HUMAN;tr|H0Y551|H0Y551_HUMAN	1	1	405410	0	1	1	1	1	1	1	405410	0	2;1	2;1	2;1	sp|P14373|TRI27_HUMAN Zinc finger protein RFP OS=Homo sapiens GN=TRIM27 PE=1 SV=1;tr|H0Y551|H0Y551_HUMAN Zinc finger protein RFP (Fragment) OS=Homo sapiens GN=TRIM27 PE=1 SV=1	2	2	2	2	0	0	0	1	1	1	1	0	0	0	0	1	1	1	1	0	0	0	0	1	1	1	1	0	5.1	5.1	5.1	58.489
tr|A0A0C4DGD2|A0A0C4DGD2_HUMAN;tr|E5RGM7|E5RGM7_HUMAN;tr|E5RK41|E5RK41_HUMAN;sp|O95391|SLU7_HUMAN	tr|A0A0C4DGD2|A0A0C4DGD2_HUMAN;tr|E5RGM7|E5RGM7_HUMAN;tr|E5RK41|E5RK41_HUMAN;sp|O95391|SLU7_HUMAN	1	1	320040	0	1	1	1	1	1	1	320040	0	1;1;1;1	1;1;1;1	1;1;1;1	tr|A0A0C4DGD2|A0A0C4DGD2_HUMAN Pre-mRNA-splicing factor SLU7 (Fragment) OS=Homo sapiens GN=SLU7 PE=1 SV=1;tr|E5RGM7|E5RGM7_HUMAN Pre-mRNA-splicing factor SLU7 (Fragment) OS=Homo sapiens GN=SLU7 PE=1 SV=1;tr|E5RK41|E5RK41_HUMAN Pre-mRNA-splicing factor SLU7	4	1	1	1	0	0	0	0	1	0	1	0	0	0	0	0	1	0	1	0	0	0	0	0	1	0	1	0	16.8	16.8	16.8	11.587
tr|B1ANR0|B1ANR0_HUMAN;sp|Q13310|PABP4_HUMAN;tr|H0Y5F5|H0Y5F5_HUMAN;tr|H0YCC8|H0YCC8_HUMAN;tr|H0YEU6|H0YEU6_HUMAN	tr|B1ANR0|B1ANR0_HUMAN;sp|Q13310|PABP4_HUMAN;tr|H0Y5F5|H0Y5F5_HUMAN	1	1	293920	0	1	1	1	1	1	1	293920	0	5;5;3;2;1	2;2;2;1;1	2;2;2;1;1	tr|B1ANR0|B1ANR0_HUMAN Polyadenylate-binding protein OS=Homo sapiens GN=PABPC4 PE=1 SV=1;sp|Q13310|PABP4_HUMAN Polyadenylate-binding protein 4 OS=Homo sapiens GN=PABPC4 PE=1 SV=1;tr|H0Y5F5|H0Y5F5_HUMAN Polyadenylate-binding protein (Fragment) OS=Homo sapie	5	5	2	2	0	0	1	0	3	4	5	3	0	0	0	0	1	1	2	0	0	0	0	0	1	1	2	0	9.6	3.7	3.7	67.97
sp|Q02413|DSG1_HUMAN	sp|Q02413|DSG1_HUMAN	1	1	260410	0	1	1	1	1	1	1	260410	0	1	1	1	sp|Q02413|DSG1_HUMAN Desmoglein-1 OS=Homo sapiens GN=DSG1 PE=1 SV=2	1	1	1	1	0	0	0	1	0	1	1	0	0	0	0	1	0	1	1	0	0	0	0	1	0	1	1	0	1.8	1.8	1.8	113.75
sp|Q06609|RAD51_HUMAN	sp|Q06609|RAD51_HUMAN	1	1	256670	0	1	1	1	1	1	1	256670	0	1	1	1	sp|Q06609|RAD51_HUMAN DNA repair protein RAD51 homolog 1 OS=Homo sapiens GN=RAD51 PE=1 SV=1	1	1	1	1	0	0	0	0	1	0	1	0	0	0	0	0	1	0	1	0	0	0	0	0	1	0	1	0	4.7	4.7	4.7	36.966
sp|O60216|RAD21_HUMAN	sp|O60216|RAD21_HUMAN	1	1	249300	0	1	1	1	1	1	1	249300	0	1	1	1	sp|O60216|RAD21_HUMAN Double-strand-break repair protein rad21 homolog OS=Homo sapiens GN=RAD21 PE=1 SV=2	1	1	1	1	0	0	0	1	1	0	1	0	0	0	0	1	1	0	1	0	0	0	0	1	1	0	1	0	2.1	2.1	2.1	71.689
tr|J3QT28|J3QT28_HUMAN;sp|O43684|BUB3_HUMAN	tr|J3QT28|J3QT28_HUMAN;sp|O43684|BUB3_HUMAN	1	1	241440	0	1	1	1	1	1	1	241440	0	2;2	2;2	2;2	tr|J3QT28|J3QT28_HUMAN Mitotic checkpoint protein BUB3 (Fragment) OS=Homo sapiens GN=BUB3 PE=1 SV=1;sp|O43684|BUB3_HUMAN Mitotic checkpoint protein BUB3 OS=Homo sapiens GN=BUB3 PE=1 SV=1	2	2	2	2	0	0	0	0	1	1	1	1	0	0	0	0	1	1	1	1	0	0	0	0	1	1	1	1	9	9	9	31.703
tr|D6RGZ2|D6RGZ2_HUMAN;sp|Q96J01|THOC3_HUMAN	tr|D6RGZ2|D6RGZ2_HUMAN;sp|Q96J01|THOC3_HUMAN	1	1	230590	0	1	1	1	1	1	1	230590	0	2;2	2;2	2;2	tr|D6RGZ2|D6RGZ2_HUMAN THO complex subunit 3 OS=Homo sapiens GN=THOC3 PE=1 SV=1;sp|Q96J01|THOC3_HUMAN THO complex subunit 3 OS=Homo sapiens GN=THOC3 PE=1 SV=1	2	2	2	2	0	0	0	0	1	0	1	0	0	0	0	0	1	0	1	0	0	0	0	0	1	0	1	0	18.1	18.1	18.1	11.062
sp|Q5JUX0|SPIN3_HUMAN	sp|Q5JUX0|SPIN3_HUMAN	1	1	226440	0	1	1	1	1	1	1	226440	0	4	1	1	sp|Q5JUX0|SPIN3_HUMAN Spindlin-3 OS=Homo sapiens GN=SPIN3 PE=1 SV=1	1	4	1	1	2	1	4	4	4	2	2	2	1	0	1	1	1	0	1	0	1	0	1	1	1	0	1	0	17.4	3.9	3.9	29.207
REV__sp|Q15149|PLEC_HUMAN	REV__sp|Q15149|PLEC_HUMAN	1	1	214850	0	1	1	1	1	1	1	214850	0	1	1	1	sp|Q15149|PLEC_HUMAN Plectin OS=Homo sapiens GN=PLEC PE=1 SV=3	1	1	1	1	0	0	0	0	1	0	1	0	0	0	0	0	1	0	1	0	0	0	0	0	1	0	1	0	0	0	0	531.78
sp|Q9NYP9|MS18A_HUMAN	sp|Q9NYP9|MS18A_HUMAN	1	1	208420	0	1	1	1	1	1	1	208420	0	1	1	1	sp|Q9NYP9|MS18A_HUMAN Protein Mis18-alpha OS=Homo sapiens GN=MIS18A PE=1 SV=1	1	1	1	1	0	0	0	0	1	0	1	0	0	0	0	0	1	0	1	0	0	0	0	0	1	0	1	0	6.4	6.4	6.4	25.863
sp|O43281|EFS_HUMAN	sp|O43281|EFS_HUMAN	1	1	204330	0	1	1	1	1	1	1	204330	0	1	1	1	sp|O43281|EFS_HUMAN Embryonal Fyn-associated substrate OS=Homo sapiens GN=EFS PE=1 SV=1	1	1	1	1	0	0	0	0	0	0	1	0	0	0	0	0	0	0	1	0	0	0	0	0	0	0	1	0	0.9	0.9	0.9	160.3
sp|Q8WW22|DNJA4_HUMAN	sp|Q8WW22|DNJA4_HUMAN	1	1	177500	0	1	1	1	1	1	1	177500	0	2	2	2	sp|Q8WW22|DNJA4_HUMAN DnaJ homolog subfamily A member 4 OS=Homo sapiens GN=DNAJA4 PE=1 SV=1	1	2	2	2	0	0	0	0	1	0	1	1	0	0	0	0	1	0	1	1	0	0	0	0	1	0	1	1	2.4	2.4	2.4	106.41
tr|U3KQF3|U3KQF3_HUMAN;tr|U3KPZ0|U3KPZ0_HUMAN;sp|P60174|TPIS_HUMAN	tr|U3KQF3|U3KQF3_HUMAN;tr|U3KPZ0|U3KPZ0_HUMAN;sp|P60174|TPIS_HUMAN	1	1	177290	0	1	1	1	1	1	1	177290	0	1;1;1	1;1;1	1;1;1	tr|U3KQF3|U3KQF3_HUMAN Triosephosphate isomerase (Fragment) OS=Homo sapiens GN=TPI1 PE=1 SV=1;tr|U3KPZ0|U3KPZ0_HUMAN Triosephosphate isomerase (Fragment) OS=Homo sapiens GN=TPI1 PE=1 SV=1;sp|P60174|TPIS_HUMAN Triosephosphate isomerase OS=Homo sapiens GN=TP	3	1	1	1	1	1	0	0	0	0	1	0	1	1	0	0	0	0	1	0	1	1	0	0	0	0	1	0	15.3	15.3	15.3	10.646
tr|R4GMN4|R4GMN4_HUMAN;tr|A0A087WWS1|A0A087WWS1_HUMAN;sp|Q96FV9|THOC1_HUMAN	tr|R4GMN4|R4GMN4_HUMAN;tr|A0A087WWS1|A0A087WWS1_HUMAN;sp|Q96FV9|THOC1_HUMAN	1	1	150150	0	1	1	1	1	1	1	150150	0	1;1;1	1;1;1	1;1;1	tr|R4GMN4|R4GMN4_HUMAN THO complex subunit 1 (Fragment) OS=Homo sapiens GN=THOC1 PE=1 SV=1;tr|A0A087WWS1|A0A087WWS1_HUMAN THO complex subunit 1 OS=Homo sapiens GN=THOC1 PE=1 SV=1;sp|Q96FV9|THOC1_HUMAN THO complex subunit 1 OS=Homo sapiens GN=THOC1 PE=1 SV=	3	1	1	1	0	0	0	0	1	0	1	0	0	0	0	0	1	0	1	0	0	0	0	0	1	0	1	0	5.5	5.5	5.5	31.926
sp|Q2TAC6|KIF19_HUMAN	sp|Q2TAC6|KIF19_HUMAN	1	5339400	1	0	1	1	1	1	1	5339400	1	0	1	1	1	sp|Q2TAC6|KIF19_HUMAN Kinesin-like protein KIF19 OS=Homo sapiens GN=KIF19 PE=2 SV=2	1	1	1	1	0	1	1	1	0	1	0	0	0	1	1	1	0	1	0	0	0	1	1	1	0	1	0	0	1	1	1	111.33
sp|Q8NCM8|DYHC2_HUMAN	sp|Q8NCM8|DYHC2_HUMAN	1	1570500	1	0	1	1	1	1	1	1570500	1	0	2	2	2	sp|Q8NCM8|DYHC2_HUMAN Cytoplasmic dynein 2 heavy chain 1 OS=Homo sapiens GN=DYNC2H1 PE=1 SV=4	1	2	2	2	0	1	1	0	1	2	0	0	0	1	1	0	1	2	0	0	0	1	1	0	1	2	0	0	0.8	0.8	0.8	528.22
tr|H0Y2W2|H0Y2W2_HUMAN	tr|H0Y2W2|H0Y2W2_HUMAN	1	1041300	1	0	1	1	1	1	1	1041300	1	0	9	1	0	tr|H0Y2W2|H0Y2W2_HUMAN ATPase family AAA domain-containing protein 3A (Fragment) OS=Homo sapiens GN=ATAD3A PE=1 SV=1	1	9	1	0	1	1	3	4	5	6	6	5	0	0	0	0	0	1	0	0	0	0	0	0	0	0	0	0	17.7	2.1	0	64.243
sp|P50402|EMD_HUMAN;tr|Q5HY57|Q5HY57_HUMAN	sp|P50402|EMD_HUMAN;tr|Q5HY57|Q5HY57_HUMAN	1	1018300	6.82408e-07	0	1	1	1465400	1	1	1018300	1	0	4;3	4;3	4;3	sp|P50402|EMD_HUMAN Emerin OS=Homo sapiens GN=EMD PE=1 SV=1;tr|Q5HY57|Q5HY57_HUMAN Emerin OS=Homo sapiens GN=EMD PE=1 SV=1	2	4	4	4	0	0	2	0	3	2	1	1	0	0	2	0	3	2	1	1	0	0	2	0	3	2	1	1	19.7	19.7	19.7	28.994
sp|Q9BXP5|SRRT_HUMAN;tr|H7C3A1|H7C3A1_HUMAN;tr|A0A0A0MSP6|A0A0A0MSP6_HUMAN	sp|Q9BXP5|SRRT_HUMAN;tr|H7C3A1|H7C3A1_HUMAN;tr|A0A0A0MSP6|A0A0A0MSP6_HUMAN	1	895600	1	0	1	1	1	1	1	895600	1	0	2;2;1	2;2;1	2;2;1	sp|Q9BXP5|SRRT_HUMAN Serrate RNA effector molecule homolog OS=Homo sapiens GN=SRRT PE=1 SV=1;tr|H7C3A1|H7C3A1_HUMAN Serrate RNA effector molecule homolog (Fragment) OS=Homo sapiens GN=SRRT PE=1 SV=1;tr|A0A0A0MSP6|A0A0A0MSP6_HUMAN Serrate RNA effector molec	3	2	2	2	0	0	0	0	1	2	1	0	0	0	0	0	1	2	1	0	0	0	0	0	1	2	1	0	2.4	2.4	2.4	100.67
tr|J3QSX6|J3QSX6_HUMAN;tr|F8W8M4|F8W8M4_HUMAN;tr|A0A0A0MRL6|A0A0A0MRL6_HUMAN;sp|O14639|ABLM1_HUMAN;tr|H0Y7N6|H0Y7N6_HUMAN;tr|F6XFR5|F6XFR5_HUMAN	tr|J3QSX6|J3QSX6_HUMAN;tr|F8W8M4|F8W8M4_HUMAN;tr|A0A0A0MRL6|A0A0A0MRL6_HUMAN;sp|O14639|ABLM1_HUMAN	1	785690	1	0	1	1	1	1	1	785690	1	0	3;3;3;3;1;1	3;3;3;3;1;1	3;3;3;3;1;1	tr|J3QSX6|J3QSX6_HUMAN Actin-binding LIM protein 1 OS=Homo sapiens GN=ABLIM1 PE=1 SV=2;tr|F8W8M4|F8W8M4_HUMAN Actin-binding LIM protein 1 OS=Homo sapiens GN=ABLIM1 PE=1 SV=1;tr|A0A0A0MRL6|A0A0A0MRL6_HUMAN Actin-binding LIM protein 1 OS=Homo sapiens GN=ABLI	6	3	3	3	0	0	1	1	2	2	1	0	0	0	1	1	2	2	1	0	0	0	1	1	2	2	1	0	9	9	9	46.07
sp|Q01804|OTUD4_HUMAN	sp|Q01804|OTUD4_HUMAN	1	766520	1	0	1	1	1	1	1	766520	1	0	4	4	4	sp|Q01804|OTUD4_HUMAN OTU domain-containing protein 4 OS=Homo sapiens GN=OTUD4 PE=1 SV=4	1	4	4	4	0	0	1	1	1	2	1	0	0	0	1	1	1	2	1	0	0	0	1	1	1	2	1	0	6.2	6.2	6.2	124.04
sp|Q16778|H2B2E_HUMAN;sp|P33778|H2B1B_HUMAN;sp|P23527|H2B1O_HUMAN;sp|P06899|H2B1J_HUMAN;sp|Q8N257|H2B3B_HUMAN;sp|Q6DRA6|H2B2D_HUMAN;sp|Q6DN03|H2B2C_HUMAN	sp|Q16778|H2B2E_HUMAN;sp|P33778|H2B1B_HUMAN;sp|P23527|H2B1O_HUMAN;sp|P06899|H2B1J_HUMAN;sp|Q8N257|H2B3B_HUMAN	1	764990	1	0	1	1	1	1	1	764990	1	0	5;5;5;5;4;2;2	1;1;1;1;1;1;1	1;1;1;1;1;1;1	sp|Q16778|H2B2E_HUMAN Histone H2B type 2-E OS=Homo sapiens GN=HIST2H2BE PE=1 SV=3;sp|P33778|H2B1B_HUMAN Histone H2B type 1-B OS=Homo sapiens GN=HIST1H2BB PE=1 SV=2;sp|P23527|H2B1O_HUMAN Histone H2B type 1-O OS=Homo sapiens GN=HIST1H2BO PE=1 SV=3;sp|P06899|	7	5	1	1	3	3	2	3	3	3	3	3	1	0	0	0	1	1	0	0	1	0	0	0	1	1	0	0	41.3	7.9	7.9	13.92
sp|Q6UN15|FIP1_HUMAN;tr|A0A0B4J203|A0A0B4J203_HUMAN	sp|Q6UN15|FIP1_HUMAN;tr|A0A0B4J203|A0A0B4J203_HUMAN	1	606940	1	0	1	1	1	1	1	606940	1	0	3;3	3;3	3;3	sp|Q6UN15|FIP1_HUMAN Pre-mRNA 3-end-processing factor FIP1 OS=Homo sapiens GN=FIP1L1 PE=1 SV=1;tr|A0A0B4J203|A0A0B4J203_HUMAN Pre-mRNA 3-end-processing factor FIP1 OS=Homo sapiens GN=FIP1L1 PE=1 SV=1	2	3	3	3	0	0	1	0	1	2	1	1	0	0	1	0	1	2	1	1	0	0	1	0	1	2	1	1	7.9	7.9	7.9	66.526
sp|Q8IUE6|H2A2B_HUMAN;sp|Q96QV6|H2A1A_HUMAN;sp|P16104|H2AX_HUMAN	sp|Q8IUE6|H2A2B_HUMAN;sp|Q96QV6|H2A1A_HUMAN;sp|P16104|H2AX_HUMAN	1	606290	1	0	1	1	1	1	1	606290	1	0	2;2;2	1;1;1	1;1;1	sp|Q8IUE6|H2A2B_HUMAN Histone H2A type 2-B OS=Homo sapiens GN=HIST2H2AB PE=1 SV=3;sp|Q96QV6|H2A1A_HUMAN Histone H2A type 1-A OS=Homo sapiens GN=HIST1H2AA PE=1 SV=3;sp|P16104|H2AX_HUMAN Histone H2AX OS=Homo sapiens GN=H2AFX PE=1 SV=2	3	2	1	1	2	1	2	1	1	1	1	1	1	0	1	0	1	1	0	0	1	0	1	0	1	1	0	0	24.6	17.7	17.7	13.995
REV__sp|Q15506|SP17_HUMAN	REV__sp|Q15506|SP17_HUMAN	1	1	1	0	1	1	1	30447000	1	1	1	0	1	1	1	sp|Q15506|SP17_HUMAN Sperm surface protein Sp17 OS=Homo sapiens GN=SPA17 PE=1 SV=1	1	1	1	1	0	1	0	1	0	0	1	1	0	1	0	1	0	0	1	1	0	1	0	1	0	0	1	1	0	0	0	17.406
CON__P01966	CON__P01966	1	1	1	0	1	1	1	3183600	1	1	1	0	4	1	1		1	4	1	1	4	4	3	4	2	2	1	1	1	1	1	1	0	0	0	0	1	1	1	1	0	0	0	0	34.5	10.6	10.6	15.184
CON__Q86YZ3;sp|Q86YZ3|HORN_HUMAN	CON__Q86YZ3;sp|Q86YZ3|HORN_HUMAN	1	1	1	0	1	1	1	2481400	1	1	1	0	2;2	2;2	2;2	;sp|Q86YZ3|HORN_HUMAN Hornerin OS=Homo sapiens GN=HRNR PE=1 SV=2	2	2	2	2	1	1	2	1	0	1	1	1	1	1	2	1	0	1	1	1	1	1	2	1	0	1	1	1	2.4	2.4	2.4	282.39
sp|O00148|DX39A_HUMAN;tr|K7EQN7|K7EQN7_HUMAN;tr|K7EPJ3|K7EPJ3_HUMAN;tr|K7ENP6|K7ENP6_HUMAN;tr|A0A0D9SEM9|A0A0D9SEM9_HUMAN;tr|K7EL56|K7EL56_HUMAN;tr|K7EIL8|K7EIL8_HUMAN;tr|K7EN69|K7EN69_HUMAN;tr|F6SXL5|F6SXL5_HUMAN	sp|O00148|DX39A_HUMAN;tr|K7EQN7|K7EQN7_HUMAN	1	1	1	0	1	1	1	2197300	1	1	1	0	10;6;3;2;2;2;2;2;2	2;1;0;0;1;0;0;0;0	2;1;0;0;1;0;0;0;0	sp|O00148|DX39A_HUMAN ATP-dependent RNA helicase DDX39A OS=Homo sapiens GN=DDX39A PE=1 SV=2;tr|K7EQN7|K7EQN7_HUMAN ATP-dependent RNA helicase DDX39A (Fragment) OS=Homo sapiens GN=DDX39A PE=1 SV=1	9	10	2	2	5	6	4	9	6	7	7	8	0	0	0	2	1	1	0	1	0	0	0	2	1	1	0	1	24.6	7	7	49.129
tr|B5MCP9|B5MCP9_HUMAN;sp|P62081|RS7_HUMAN	tr|B5MCP9|B5MCP9_HUMAN;sp|P62081|RS7_HUMAN	1	1	1	0	1	1	1	2180500	1	1	1	0	2;2	2;2	2;2	tr|B5MCP9|B5MCP9_HUMAN 40S ribosomal protein S7 OS=Homo sapiens GN=RPS7 PE=1 SV=1;sp|P62081|RS7_HUMAN 40S ribosomal protein S7 OS=Homo sapiens GN=RPS7 PE=1 SV=1	2	2	2	2	0	0	0	2	0	0	0	1	0	0	0	2	0	0	0	1	0	0	0	2	0	0	0	1	18.2	18.2	18.2	21.312
sp|Q86TV6|TTC7B_HUMAN;tr|Q6PIF1|Q6PIF1_HUMAN;tr|H0YJP9|H0YJP9_HUMAN;tr|G3V3H1|G3V3H1_HUMAN;tr|H0YJS2|H0YJS2_HUMAN;tr|A0A0C4DGK5|A0A0C4DGK5_HUMAN	sp|Q86TV6|TTC7B_HUMAN;tr|Q6PIF1|Q6PIF1_HUMAN	1	6.34921e-07	5.35848e-07	0	1	1575000	1866200	1673900	1	1	1	0	5;3;2;2;1;1	5;3;2;2;1;1	5;3;2;2;1;1	sp|Q86TV6|TTC7B_HUMAN Tetratricopeptide repeat protein 7B OS=Homo sapiens GN=TTC7B PE=1 SV=3;tr|Q6PIF1|Q6PIF1_HUMAN TTC7B protein (Fragment) OS=Homo sapiens GN=TTC7B PE=1 SV=1	6	5	5	5	1	2	4	3	1	1	2	1	1	2	4	3	1	1	2	1	1	2	4	3	1	1	2	1	5.8	5.8	5.8	94.178
tr|A0A087WVS8|A0A087WVS8_HUMAN;sp|Q70IA6|MOB2_HUMAN	tr|A0A087WVS8|A0A087WVS8_HUMAN;sp|Q70IA6|MOB2_HUMAN	1	1	1	0	1	1	1	1444500	1	1	1	0	3;3	3;3	3;3	tr|A0A087WVS8|A0A087WVS8_HUMAN MOB kinase activator 2 OS=Homo sapiens GN=MOB2 PE=1 SV=1;sp|Q70IA6|MOB2_HUMAN MOB kinase activator 2 OS=Homo sapiens GN=MOB2 PE=1 SV=1	2	3	3	3	0	0	1	2	1	1	0	0	0	0	1	2	1	1	0	0	0	0	1	2	1	1	0	0	10.6	10.6	10.6	26.879
tr|E7ENZ3|E7ENZ3_HUMAN;tr|B7ZAR1|B7ZAR1_HUMAN;tr|E9PCA1|E9PCA1_HUMAN;sp|P48643|TCPE_HUMAN	tr|E7ENZ3|E7ENZ3_HUMAN;tr|B7ZAR1|B7ZAR1_HUMAN;tr|E9PCA1|E9PCA1_HUMAN;sp|P48643|TCPE_HUMAN	1	1	1	0	1	1	1	1074400	1	1	1	0	4;4;4;4	4;4;4;4	4;4;4;4	tr|E7ENZ3|E7ENZ3_HUMAN T-complex protein 1 subunit epsilon OS=Homo sapiens GN=CCT5 PE=1 SV=1;tr|B7ZAR1|B7ZAR1_HUMAN T-complex protein 1 subunit epsilon OS=Homo sapiens GN=CCT5 PE=1 SV=1;tr|E9PCA1|E9PCA1_HUMAN T-complex protein 1 subunit epsilon OS=Homo sap	4	4	4	4	0	0	0	2	1	1	2	1	0	0	0	2	1	1	2	1	0	0	0	2	1	1	2	1	11.1	11.1	11.1	53.848
tr|H7C3P9|H7C3P9_HUMAN;sp|Q9UNS2|CSN3_HUMAN	tr|H7C3P9|H7C3P9_HUMAN;sp|Q9UNS2|CSN3_HUMAN	1	1	1	0	1	1	1	1046300	1	1	1	0	1;1	1;1	1;1	tr|H7C3P9|H7C3P9_HUMAN COP9 signalosome complex subunit 3 OS=Homo sapiens GN=COPS3 PE=1 SV=2;sp|Q9UNS2|CSN3_HUMAN COP9 signalosome complex subunit 3 OS=Homo sapiens GN=COPS3 PE=1 SV=3	2	1	1	1	0	0	0	1	0	0	0	0	0	0	0	1	0	0	0	0	0	0	0	1	0	0	0	0	4.6	4.6	4.6	39.036
tr|B7Z645|B7Z645_HUMAN;sp|O43390|HNRPR_HUMAN;sp|O60506|HNRPQ_HUMAN;tr|F6UXX1|F6UXX1_HUMAN;tr|B4DT28|B4DT28_HUMAN	tr|B7Z645|B7Z645_HUMAN;sp|O43390|HNRPR_HUMAN;sp|O60506|HNRPQ_HUMAN;tr|F6UXX1|F6UXX1_HUMAN;tr|B4DT28|B4DT28_HUMAN	1	1	1	0	1	1	1	858390	1	1	1	0	2;2;2;1;1	2;2;2;1;1	2;2;2;1;1	tr|B7Z645|B7Z645_HUMAN Heterogeneous nuclear ribonucleoprotein Q OS=Homo sapiens GN=SYNCRIP PE=1 SV=1;sp|O43390|HNRPR_HUMAN Heterogeneous nuclear ribonucleoprotein R OS=Homo sapiens GN=HNRNPR PE=1 SV=1;sp|O60506|HNRPQ_HUMAN Heterogeneous nuclear ribonucleo	5	2	2	2	0	0	0	2	1	0	0	1	0	0	0	2	1	0	0	1	0	0	0	2	1	0	0	1	4.3	4.3	4.3	52.046
sp|O00303|EIF3F_HUMAN;tr|H0YDT6|H0YDT6_HUMAN	sp|O00303|EIF3F_HUMAN;tr|H0YDT6|H0YDT6_HUMAN	1	1	1	0	1	1	1	564770	1	1	1	0	2;1	2;1	2;1	sp|O00303|EIF3F_HUMAN Eukaryotic translation initiation factor 3 subunit F OS=Homo sapiens GN=EIF3F PE=1 SV=1;tr|H0YDT6|H0YDT6_HUMAN Eukaryotic translation initiation factor 3 subunit F (Fragment) OS=Homo sapiens GN=EIF3F PE=1 SV=1	2	2	2	2	0	0	0	2	1	1	1	1	0	0	0	2	1	1	1	1	0	0	0	2	1	1	1	1	7	7	7	37.563
sp|P55072|TERA_HUMAN	sp|P55072|TERA_HUMAN	1	1	1	0	1	1	1	455930	1	1	1	0	1	1	1	sp|P55072|TERA_HUMAN Transitional endoplasmic reticulum ATPase OS=Homo sapiens GN=VCP PE=1 SV=4	1	1	1	1	0	0	0	1	0	0	0	0	0	0	0	1	0	0	0	0	0	0	0	1	0	0	0	0	2.1	2.1	2.1	89.321
sp|Q92569|P55G_HUMAN;tr|E5RJY0|E5RJY0_HUMAN;tr|H0YBC2|H0YBC2_HUMAN;tr|J3QKT4|J3QKT4_HUMAN;tr|J3KQ22|J3KQ22_HUMAN;tr|J3KRR4|J3KRR4_HUMAN;tr|B1B1G2|B1B1G2_HUMAN;tr|F6TDL0|F6TDL0_HUMAN;sp|P27986|P85A_HUMAN;sp|O00459|P85B_HUMAN;tr|J3QKW8|J3QKW8_HUMAN;tr|Q5TFM2|Q5TFM2_HUMAN;tr|H7BZA6|H7BZA6_HUMAN;tr|J3QRH7|J3QRH7_HUMAN;tr|Q7Z319|Q7Z319_HUMAN	sp|Q92569|P55G_HUMAN;tr|E5RJY0|E5RJY0_HUMAN;tr|H0YBC2|H0YBC2_HUMAN;tr|J3QKT4|J3QKT4_HUMAN;tr|J3KQ22|J3KQ22_HUMAN;tr|J3KRR4|J3KRR4_HUMAN;tr|B1B1G2|B1B1G2_HUMAN;tr|F6TDL0|F6TDL0_HUMAN;sp|P27986|P85A_HUMAN;sp|O00459|P85B_HUMAN;tr|J3QKW8|J3QKW8_HUMAN;tr|Q5TFM2|Q5TFM2_HUMAN;tr|H7BZA6|H7BZA6_HUMAN;tr|J3QRH7|J3QRH7_HUMAN;tr|Q7Z319|Q7Z319_HUMAN	1	1	1	0	1	1	1	284480	1	1	1	0	2;1;1;1;1;1;1;1;1;1;1;1;1;1;1	2;1;1;1;1;1;1;1;1;1;1;1;1;1;1	2;1;1;1;1;1;1;1;1;1;1;1;1;1;1	sp|Q92569|P55G_HUMAN Phosphatidylinositol 3-kinase regulatory subunit gamma OS=Homo sapiens GN=PIK3R3 PE=1 SV=2;tr|E5RJY0|E5RJY0_HUMAN Phosphatidylinositol 3-kinase regulatory subunit alpha (Fragment) OS=Homo sapiens GN=PIK3R1 PE=1 SV=1;tr|H0YBC2|H0YBC2_HU	15	2	2	2	0	0	0	1	1	0	0	0	0	0	0	1	1	0	0	0	0	0	0	1	1	0	0	0	2.3	2.3	2.3	97.11
sp|P30041|PRDX6_HUMAN	sp|P30041|PRDX6_HUMAN	1	1	9.4518e-07	0	1	1	1058000	1	1	1	1	0	2	2	2	sp|P30041|PRDX6_HUMAN Peroxiredoxin-6 OS=Homo sapiens GN=PRDX6 PE=1 SV=3	1	2	2	2	1	0	2	0	1	1	1	1	1	0	2	0	1	1	1	1	1	0	2	0	1	1	1	1	8.9	8.9	8.9	25.035
CON__Q8BGZ7	CON__Q8BGZ7	1	1	1.77847e-06	0	1	1	562280	1	1	1	1	0	10	1	1		1	10	1	1	5	4	8	8	5	5	6	5	0	0	1	0	0	0	0	0	0	0	1	0	0	0	0	0	16	1.8	1.8	59.74
tr|H3BT58|H3BT58_HUMAN;sp|Q14019|COTL1_HUMAN	tr|H3BT58|H3BT58_HUMAN;sp|Q14019|COTL1_HUMAN	1	1.07065e-06	1	0	1	934010	1	1	1	1	1	0	1;1	1;1	1;1	tr|H3BT58|H3BT58_HUMAN Coactosin-like protein OS=Homo sapiens GN=COTL1 PE=1 SV=1;sp|Q14019|COTL1_HUMAN Coactosin-like protein OS=Homo sapiens GN=COTL1 PE=1 SV=3	2	1	1	1	1	1	0	0	0	0	0	0	1	1	0	0	0	0	0	0	1	1	0	0	0	0	0	0	21.9	21.9	21.9	8.2242
tr|E7EX29|E7EX29_HUMAN;sp|P63104|1433Z_HUMAN;tr|B7Z2E6|B7Z2E6_HUMAN;tr|H0YB80|H0YB80_HUMAN;tr|B0AZS6|B0AZS6_HUMAN	tr|E7EX29|E7EX29_HUMAN;sp|P63104|1433Z_HUMAN;tr|B7Z2E6|B7Z2E6_HUMAN;tr|H0YB80|H0YB80_HUMAN;tr|B0AZS6|B0AZS6_HUMAN	1	1.22212e-06	1	0	1	818250	1	1	1	1	1	0	3;3;2;2;2	1;1;1;1;1	1;1;1;1;1	tr|E7EX29|E7EX29_HUMAN 14-3-3 protein zeta/delta (Fragment) OS=Homo sapiens GN=YWHAZ PE=1 SV=1;sp|P63104|1433Z_HUMAN 14-3-3 protein zeta/delta OS=Homo sapiens GN=YWHAZ PE=1 SV=1;tr|B7Z2E6|B7Z2E6_HUMAN 14-3-3 protein zeta/delta OS=Homo sapiens GN=YWHAZ PE=1	5	3	1	1	2	2	1	0	1	1	1	2	1	1	0	0	0	0	0	0	1	1	0	0	0	0	0	0	15	7.7	7.7	28.036
tr|X6RJP6|X6RJP6_HUMAN;sp|P37802|TAGL2_HUMAN	tr|X6RJP6|X6RJP6_HUMAN;sp|P37802|TAGL2_HUMAN	1	1.44802e-06	1	0	1	690600	1	1	1	1	1	0	1;1	1;1	1;1	tr|X6RJP6|X6RJP6_HUMAN Transgelin-2 (Fragment) OS=Homo sapiens GN=TAGLN2 PE=1 SV=1;sp|P37802|TAGL2_HUMAN Transgelin-2 OS=Homo sapiens GN=TAGLN2 PE=1 SV=3	2	1	1	1	1	1	0	0	0	0	0	0	1	1	0	0	0	0	0	0	1	1	0	0	0	0	0	0	9.6	9.6	9.6	21.086
REV__tr|H7BY33|H7BY33_HUMAN;REV__sp|A6NC98|CC88B_HUMAN	REV__tr|H7BY33|H7BY33_HUMAN;REV__sp|A6NC98|CC88B_HUMAN	1	3.01759e-06	1	0	1	331390	1	1	1	1	1	0	1;1	1;1	1;1	tr|H7BY33|H7BY33_HUMAN Coiled-coil domain-containing protein 88B OS=Homo sapiens GN=CCDC88B PE=1 SV=1;sp|A6NC98|CC88B_HUMAN Coiled-coil domain-containing protein 88B OS=Homo sapiens GN=CCDC88B PE=1 SV=1	2	1	1	1	0	1	0	0	0	0	0	0	0	1	0	0	0	0	0	0	0	1	0	0	0	0	0	0	0	0	0	80.654
sp|Q06830|PRDX1_HUMAN;tr|A0A0A0MSI0|A0A0A0MSI0_HUMAN;tr|A0A0A0MRQ5|A0A0A0MRQ5_HUMAN	sp|Q06830|PRDX1_HUMAN;tr|A0A0A0MSI0|A0A0A0MSI0_HUMAN;tr|A0A0A0MRQ5|A0A0A0MRQ5_HUMAN	0.905065	0.612987	1	0	3443400	2377700	1	1	3116500	1457500	1	0	6;6;5	6;6;5	3;3;2	sp|Q06830|PRDX1_HUMAN Peroxiredoxin-1 OS=Homo sapiens GN=PRDX1 PE=1 SV=1;tr|A0A0A0MSI0|A0A0A0MSI0_HUMAN Peroxiredoxin-1 (Fragment) OS=Homo sapiens GN=PRDX1 PE=1 SV=1;tr|A0A0A0MRQ5|A0A0A0MRQ5_HUMAN Peroxiredoxin-1 OS=Homo sapiens GN=PRDX1 PE=1 SV=1	3	6	6	3	2	2	1	1	3	3	2	2	2	2	1	1	3	3	2	2	1	1	1	1	2	1	1	2	25.1	25.1	13.6	22.11
sp|P25398|RS12_HUMAN	sp|P25398|RS12_HUMAN	0.888979	0.668141	0.864511	0	2581500	2396200	2192800	1	2294900	1601000	1895700	0	3	3	3	sp|P25398|RS12_HUMAN 40S ribosomal protein S12 OS=Homo sapiens GN=RPS12 PE=1 SV=3	1	3	3	3	3	3	2	0	2	3	2	0	3	3	2	0	2	3	2	0	3	3	2	0	2	3	2	0	30.3	30.3	30.3	14.515
sp|P47914|RL29_HUMAN	sp|P47914|RL29_HUMAN	0.841995	1.31452	2.03476	0	24879000	20530000	19044000	21217000	20948000	26987000	38750000	0	3	3	3	sp|P47914|RL29_HUMAN 60S ribosomal protein L29 OS=Homo sapiens GN=RPL29 PE=1 SV=2	1	3	3	3	3	2	2	2	2	2	2	1	3	2	2	2	2	2	2	1	3	2	2	2	2	2	2	1	22.6	22.6	22.6	17.752
tr|E9PQB7|E9PQB7_HUMAN;tr|E9PP50|E9PP50_HUMAN;sp|P23528|COF1_HUMAN;tr|E9PK25|E9PK25_HUMAN;tr|H0YDS7|H0YDS7_HUMAN;tr|E9PLJ3|E9PLJ3_HUMAN;tr|E9PS23|E9PS23_HUMAN;sp|Q9Y281|COF2_HUMAN	tr|E9PQB7|E9PQB7_HUMAN;tr|E9PP50|E9PP50_HUMAN;sp|P23528|COF1_HUMAN;tr|E9PK25|E9PK25_HUMAN;tr|H0YDS7|H0YDS7_HUMAN;tr|E9PLJ3|E9PLJ3_HUMAN;tr|E9PS23|E9PS23_HUMAN;sp|Q9Y281|COF2_HUMAN	0.346826	2.3232e-07	4.88281e-07	0	6080000	4304400	2048000	1	2108700	1	1	0	4;4;4;4;4;3;2;2	4;4;4;4;4;3;2;2	4;4;4;4;4;3;2;2	tr|E9PQB7|E9PQB7_HUMAN Cofilin-1 (Fragment) OS=Homo sapiens GN=CFL1 PE=1 SV=1;tr|E9PP50|E9PP50_HUMAN Cofilin-1 (Fragment) OS=Homo sapiens GN=CFL1 PE=1 SV=5;sp|P23528|COF1_HUMAN Cofilin-1 OS=Homo sapiens GN=CFL1 PE=1 SV=3;tr|E9PK25|E9PK25_HUMAN Cofilin-1 OS	8	4	4	4	4	4	3	1	3	1	1	1	4	4	3	1	3	1	1	1	4	4	3	1	3	1	1	1	45.9	45.9	45.9	13.923
tr|H0YJC4|H0YJC4_HUMAN;sp|P60900|PSA6_HUMAN;tr|G3V5Z7|G3V5Z7_HUMAN	tr|H0YJC4|H0YJC4_HUMAN;sp|P60900|PSA6_HUMAN;tr|G3V5Z7|G3V5Z7_HUMAN	6.96718e-07	1	1	0	1435300	1	1	1	1	1	1	0	1;1;1	1;1;1	1;1;1	tr|H0YJC4|H0YJC4_HUMAN Proteasome subunit alpha type-6 (Fragment) OS=Homo sapiens GN=PSMA6 PE=1 SV=1;sp|P60900|PSA6_HUMAN Proteasome subunit alpha type-6 OS=Homo sapiens GN=PSMA6 PE=1 SV=1;tr|G3V5Z7|G3V5Z7_HUMAN Proteasome subunit alpha type OS=Homo sapien	3	1	1	1	1	0	0	0	0	0	0	0	1	0	0	0	0	0	0	0	1	0	0	0	0	0	0	0	21.2	21.2	21.2	9.2305
sp|Q96I25|SPF45_HUMAN;tr|Q5W011|Q5W011_HUMAN;tr|Q5W010|Q5W010_HUMAN;tr|H0Y6J6|H0Y6J6_HUMAN;tr|Q5W012|Q5W012_HUMAN	sp|Q96I25|SPF45_HUMAN;tr|Q5W011|Q5W011_HUMAN;tr|Q5W010|Q5W010_HUMAN	5.79206e-07	0.939498	5.76269e-07	0	1726500	2018100	1735300	2055800	1	1896000	1	0	3;2;2;1;1	3;2;2;1;1	3;2;2;1;1	sp|Q96I25|SPF45_HUMAN Splicing factor 45 OS=Homo sapiens GN=RBM17 PE=1 SV=1;tr|Q5W011|Q5W011_HUMAN Splicing factor 45 (Fragment) OS=Homo sapiens GN=RBM17 PE=1 SV=1;tr|Q5W010|Q5W010_HUMAN Splicing factor 45 (Fragment) OS=Homo sapiens GN=RBM17 PE=1 SV=1	5	3	3	3	2	2	2	2	1	2	1	2	2	2	2	2	1	2	1	2	2	2	2	2	1	2	1	2	7.5	7.5	7.5	44.961
sp|Q13868|EXOS2_HUMAN;tr|A3KFL1|A3KFL1_HUMAN;tr|A3KFL5|A3KFL5_HUMAN;tr|A3KFL2|A3KFL2_HUMAN	sp|Q13868|EXOS2_HUMAN;tr|A3KFL1|A3KFL1_HUMAN;tr|A3KFL5|A3KFL5_HUMAN;tr|A3KFL2|A3KFL2_HUMAN	5.68958e-07	3.53895e-07	3981300	0	1757600	2825700	1	1	1	1	3981300	0	4;3;3;3	4;3;3;3	4;3;3;3	sp|Q13868|EXOS2_HUMAN Exosome complex component RRP4 OS=Homo sapiens GN=EXOSC2 PE=1 SV=2;tr|A3KFL1|A3KFL1_HUMAN Exosome complex component RRP4 (Fragment) OS=Homo sapiens GN=EXOSC2 PE=1 SV=1;tr|A3KFL5|A3KFL5_HUMAN Exosome complex component RRP4 (Fragment) O	4	4	4	4	3	2	0	0	1	1	3	0	3	2	0	0	1	1	3	0	3	2	0	0	1	1	3	0	16	16	16	32.789
sp|Q01130|SRSF2_HUMAN;sp|Q9BRL6|SRSF8_HUMAN;tr|J3QL05|J3QL05_HUMAN;tr|J3KP15|J3KP15_HUMAN	sp|Q01130|SRSF2_HUMAN;sp|Q9BRL6|SRSF8_HUMAN;tr|J3QL05|J3QL05_HUMAN;tr|J3KP15|J3KP15_HUMAN	5.53373e-07	1.18542	1	0	1807100	1669700	1	1812600	1	1979300	1	0	2;2;2;2	2;2;2;2	2;2;2;2	sp|Q01130|SRSF2_HUMAN Serine/arginine-rich splicing factor 2 OS=Homo sapiens GN=SRSF2 PE=1 SV=4;sp|Q9BRL6|SRSF8_HUMAN Serine/arginine-rich splicing factor 8 OS=Homo sapiens GN=SRSF8 PE=1 SV=1;tr|J3QL05|J3QL05_HUMAN Serine/arginine-rich-splicing factor 2 (F	4	2	2	2	2	2	1	2	2	2	1	1	2	2	1	2	2	2	1	1	2	2	1	2	2	2	1	1	6.8	6.8	6.8	25.476
sp|P07737|PROF1_HUMAN;tr|I3L3D5|I3L3D5_HUMAN;tr|B4E301|B4E301_HUMAN	sp|P07737|PROF1_HUMAN;tr|I3L3D5|I3L3D5_HUMAN;tr|B4E301|B4E301_HUMAN	5.46448e-07	1	1	0	1830000	1	1	1	1	1	1	0	2;1;1	2;1;1	2;1;1	sp|P07737|PROF1_HUMAN Profilin-1 OS=Homo sapiens GN=PFN1 PE=1 SV=2;tr|I3L3D5|I3L3D5_HUMAN Profilin-1 (Fragment) OS=Homo sapiens GN=PFN1 PE=1 SV=1;tr|B4E301|B4E301_HUMAN Nucleoporin Nup43 OS=Homo sapiens GN=NUP43 PE=1 SV=1	3	2	2	2	2	1	1	0	1	1	1	0	2	1	1	0	1	1	1	0	2	1	1	0	1	1	1	0	21.4	21.4	21.4	15.054
sp|A6NIZ1|RP1BL_HUMAN;sp|P62834|RAP1A_HUMAN;sp|P61224|RAP1B_HUMAN;tr|F5H4H0|F5H4H0_HUMAN;tr|F5GYB5|F5GYB5_HUMAN;tr|F5H823|F5H823_HUMAN;tr|F5H0B7|F5H0B7_HUMAN;tr|F8WBC0|F8WBC0_HUMAN;tr|F5H7Y6|F5H7Y6_HUMAN;tr|E7ESV4|E7ESV4_HUMAN;tr|A0A075B6Q0|A0A075B6Q0_HUMAN;tr|F5GYH7|F5GYH7_HUMAN;tr|F5H004|F5H004_HUMAN;tr|F5GZG1|F5GZG1_HUMAN;tr|F5H6R7|F5H6R7_HUMAN;tr|B7ZB78|B7ZB78_HUMAN;tr|F5H500|F5H500_HUMAN;tr|…	sp|A6NIZ1|RP1BL_HUMAN;sp|P62834|RAP1A_HUMAN;sp|P61224|RAP1B_HUMAN;tr|F5H4H0|F5H4H0_HUMAN;tr|F5GYB5|F5GYB5_HUMAN;tr|F5H823|F5H823_HUMAN;tr|F5H0B7|F5H0B7_HUMAN;tr|F8WBC0|F8WBC0_HUMAN;tr|F5H7Y6|F5H7Y6_HUMAN;tr|E7ESV4|E7ESV4_HUMAN;tr|A0A075B6Q0|A0A075B6Q0_HUMAN;tr|F5GYH7|F5GYH7_HUMAN;tr|F5H004|F5H004_HUMAN;tr|F5GZG1|F5GZG1_HUMAN;tr|F5H6R7|F5H6R7_HUMAN;tr|B7ZB78|B7ZB78_HUMAN;tr|F5H500|F5H500_HUMAN;tr|…	3.34091e-07	3.45066e-07	1	0	2993200	2898000	1	1	1	1	1	0	2;2;2;1;1;1;1;1;1;1;1;1;1;1;1;1;1;1;1;1;1	2;2;2;1;1;1;1;1;1;1;1;1;1;1;1;1;1;1;1;1;1	2;2;2;1;1;1;1;1;1;1;1;1;1;1;1;1;1;1;1;1;1	sp|A6NIZ1|RP1BL_HUMAN Ras-related protein Rap-1b-like protein OS=Homo sapiens PE=2 SV=1;sp|P62834|RAP1A_HUMAN Ras-related protein Rap-1A OS=Homo sapiens GN=RAP1A PE=1 SV=1;sp|P61224|RAP1B_HUMAN Ras-related protein Rap-1b OS=Homo sapiens GN=RAP1B PE=1 SV=1;	21	2	2	2	2	2	0	0	0	0	0	0	2	2	0	0	0	0	0	0	2	2	0	0	0	0	0	0	14.7	14.7	14.7	20.925
CON__Streptavidin	CON__Streptavidin	1.66717e-07	4.04531e-07	1	0	5998200	2472000	1	1	1	1	1	0	3	3	3		1	3	3	3	3	2	0	0	0	0	0	0	3	2	0	0	0	0	0	0	3	2	0	0	0	0	0	0	36.2	36.2	36.2	16.622
[truncated: 42 more columns]
