# Supplementary material for: Nascent alt-protein chemoproteomics reveals a repressor of ribosome biogenesis
Source: Research Square preprint supplement (doi:10.21203/rs.3.rs-871945/v1), 2021-09-09
Supplement: Supplementary file 4 [file 48ba16fce12012b0c01c5ff1.xlsx]

## Sheet: Key
Abbreviations used for protein and peptide identification summary tables
Peptide Identifications
Database Accession	three-frame (forward only) translation of mRNA-seq from HEK 293T; contaminants
Peptide m/z	Observed mass over charge
Peptide Mass	Observed relative molecular mass
Mass Delta M	Difference (error) between the experimental and calculated masses
Peptide Score	Peptide match score
Peptide Sequence	Sequence of the peptide in 1-letter code
Variable Modifications	Any variable modifications found in the peptide
Protein Identifications
Num. of unique sequences	Number of peptides that match uniquely to protein query
Num. of significant unique sequences	Number of unique peptide matches above significance threshold (p<0.05)
Accession	Accession no. from database
Num. of matches	Total MS/MS queries matched to protein
Num. of significant matches	Total significant MS/MS queries matched to protein
Num. of sequences	Total number of non-redundant peptide sequences matching to protein query
Num. of significant sequences	Number of peptide matches above significance theshold (p<0.05)
Worksheets
S1	Key
S2	MINAS-60 peptide level evidence in HEK 293T cell
S3	MINAS-60 protein level evidence in HEK 293T cell

## Sheet: MINAS-60_peptide
Query	Observed	Mr(expt)	Mr(calc)	Delta	M	Score	Expect	Rank	Peptide	Variable Modifications
2988	975.475	1948.94	1948.94	-0.0018	0	136	2.9e-12	1	GNDISSGTVLSDYVGSGPPK
2740	854.386	1706.76	1706.76	-0.0065	0	120	4.7e-11	1	GSLGGGFSSGGFSGGSFSR
3724	1184.14	2366.26	2366.26	0.0021	0	120	1.5e-10	1	NQILNLTTDNANILLQIDNAR
2741	854.389	1706.76	1706.76	-0.0005	0	119	6.1e-11	1	GSLGGGFSSGGFSGGSFSR
3435	1116.04	2230.06	2230.06	0.0016	0	114	1.1e-10	1	DLYANTVLSGGTTMYPGIADR	Oxidation (M)
2888	919.962	1837.91	1837.91	0.0013	0	113	2.6e-10	1	SISISVAGGGGGFGAAGGFGGR
2436	730.904	1459.79	1459.79	0.001	0	111	2.1e-08	1	VDLLNQEIEFLK
3304	1088.57	2175.12	2174.11	1.0064	0	110	2.2e-09	1	LAPITSDPTEATAVGAVEASFK
2760	872.413	1742.81	1742.81	-0.0005	0	109	1.4e-09	1	AMGIMNSFVNDIFER
2599	794.906	1587.8	1587.8	-0.0009	0	107	9e-09	1	LAETQEEISAEVAAK
3004	981.956	1961.9	1961.9	-0.0004	0	107	5.3e-10	1	NAHSATTWSGQYVGGAEAR
2646	813.377	1624.74	1624.74	-0.0004	0	107	6.5e-09	1	DSLLQDGEFSMDLR
2879	918.423	1834.83	1834.83	-0.0003	0	106	1.4e-07	1	MTDQEAIQDLWQWR	Oxidation (M)
2666	820.928	1639.84	1639.84	0.0004	0	106	6.8e-10	1	VSEGGPAEIAGLQIGDK
2335	708.84	1415.67	1415.66	0.0016	0	106	1.3e-09	1	ITAEEMYDIFGK
3262	1077.51	2153.01	2153.01	-0.0008	0	105	1.4e-09	1	YDSAPATDGSGTALGWTVAWK
2812	892.957	1783.9	1783.9	0.0006	0	105	3.2e-09	1	LFIGGLSFETTDESLR
4102	1088.84	3263.51	3263.51	0.0007	0	104	6.9e-09	1	DIENQYETQITQIEHEVSSSGQEVQSSAK
2803	889.947	1777.88	1777.88	-0.0024	0	102	1.1e-08	1	NPVTIFSLATNEMWR
3723	789.759	2366.26	2366.26	0.0005	0	101	5.9e-09	1	NQILNLTTDNANILLQIDNAR
3009	982.968	1963.92	1963.92	-0.0014	0	100	1e-08	1	GTGGVDTAAVGGVFDVSNADR
2774	880.411	1758.81	1758.81	0.0006	0	100	1.9e-08	1	AMGIMNSFVNDIFER	Oxidation (M)
2372	717.851	1433.69	1433.69	-0.0016	0	98	4.9e-08	1	SQGGEPTYNVAVGR
2437	730.904	1459.79	1459.79	0.0022	0	98	4.6e-08	1	ILTFDQLALDSPK
2470	740.402	1478.79	1478.79	0.0014	0	97	5.3e-08	1	LGEYGFQNALIVR
1836	610.804	1219.59	1219.59	0.0002	0	97	5.2e-07	1	ASLENSLEETK
3110	1017.52	2033.02	2033.02	-0.0011	0	97	6.6e-09	1	INTQWLLTSGTTEANAWK
3127	1023.5	2044.99	2045	-0.0058	0	97	2e-08	1	TLPETLDPAEYNISPETR
2461	738.384	1474.75	1474.75	0	0	96	9.2e-09	1	LPAAGVGDMVMATVK	Oxidation (M)
2304	700.82	1399.62	1399.63	-0.0008	0	96	3.4e-08	1	FNEVAAQYSEDK
3266	1077.51	2153.01	2153.01	0.0023	0	96	8.5e-09	1	YDSAPATDGSGTALGWTVAWK
2348	712.338	1422.66	1422.66	-0.0007	0	96	9.5e-08	1	ELAEDGYSGVEVR
2460	738.383	1474.75	1474.75	-0.0003	0	95	1.4e-08	1	LPAAGVGDMVMATVK	Oxidation (M)
2998	981.954	1961.89	1961.9	-0.0042	0	95	5.1e-09	1	NAHSATTWSGQYVGGAEAR
3104	1017.03	2032.05	2032.05	-0.0001	0	94	4.3e-08	1	FTASAGIQVVGDDLTVTNPK
2747	858.929	1715.84	1715.84	0.0005	0	94	5.9e-08	1	QISNLQQSISDAEQR
3258	1077.51	2153	2153.01	-0.0038	0	94	8.2e-09	1	YDSAPATDGSGTALGWTVAWK
3072	1004.45	2006.88	2006.89	-0.0011	0	93	9.5e-09	1	TIGGGDDSFNTFFSETGAGK
1869	616.802	1231.59	1231.59	-0.0014	0	93	1e-07	1	SGGGGGGGLGSGGSIR
3261	1077.51	2153.01	2153.01	-0.0011	0	93	6.8e-09	1	YDSAPATDGSGTALGWTVAWK
3260	1077.51	2153	2153.01	-0.0018	0	93	6.4e-09	1	YDSAPATDGSGTALGWTVAWK
2862	910.426	1818.84	1818.84	0.0006	0	93	3.2e-06	1	MTDQEAIQDLWQWR
2432	730.387	1458.76	1458.76	0.0022	0	92	1.1e-08	1	LPAAGVGDMVMATVK
2652	815.891	1629.77	1629.77	-0.0001	0	91	1.6e-07	1	QDLPNAMNAAEITDK
2689	829.429	1656.84	1656.85	-0.0016	0	91	3.1e-08	1	DLADELALVDVIEDK
2272	695.844	1389.67	1389.67	-0.0007	0	91	5.5e-07	1	QSLEASLAETEGR
2776	880.411	1758.81	1758.81	0.0008	0	90	9.1e-08	1	AMGIMNSFVNDIFER	Oxidation (M)
2433	730.388	1458.76	1458.76	0.0039	0	89	9.2e-08	1	LPAAGVGDMVMATVK
2775	880.411	1758.81	1758.81	0.0008	0	89	2.7e-07	1	AMGIMNSFVNDIFER	Oxidation (M)
2871	913.968	1825.92	1825.92	-0.0001	0	88	1.1e-07	1	TVAGGAWTYNTTSAVTVK
1988	631.801	1261.59	1261.59	-0.0016	0	88	3.3e-07	1	SLLEGEGSSGGGGR
2363	715.36	1428.71	1428.71	-0.0034	0	88	1e-06	1	IEDVTPIPSDSTR
2682	826.947	1651.88	1651.88	0.0017	0	88	1.8e-07	1	ILQDVADEEIAALPR
2765	874.429	1746.84	1746.84	0.0004	0	87	1.8e-06	1	GPDGLTAFEATDNQAIK
2597	793.887	1585.76	1585.76	0.0018	0	87	7.3e-07	1	VQALEEANNDLENK
3058	998.989	1995.96	1995.96	-0.0004	0	87	1e-07	1	ELTTEIDNNIEQISSYK
2178	668.823	1335.63	1335.63	0.0003	0	86	6.9e-07	1	TAFQEALDAAGDK
2197	673.37	1344.72	1344.72	-0.0002	0	86	3.2e-07	1	TAVVVGTITDDVR
2440	731.368	1460.72	1460.72	-0.0009	1	85	6.4e-07	1	KSEIEYYAMLAK	Oxidation (M)
1600	579.299	1156.58	1156.58	-0.0001	0	84	9.5e-07	1	QGVDADINGLR
2128	656.891	1311.77	1311.77	0.0015	0	84	4e-06	1	IASGLGLAWIVGR
2028	638.343	1274.67	1274.67	0.0002	0	83	7.1e-07	1	VIGGDDLSTLTGK
2614	800.42	1598.83	1598.83	-0.0003	1	83	1.3e-05	1	NKLNDLEDALQQAK
2701	834.381	1666.75	1666.75	-0.0004	0	82	9.7e-08	1	GPVEGYEENEEFLR
2264	691.327	1380.64	1380.64	-0.0007	0	82	5.9e-07	1	ALEESNYELEGK
2371	717.851	1433.69	1433.69	-0.0034	0	82	3e-06	1	SQGGEPTYNVAVGR
2762	872.414	1742.81	1742.81	0.0006	0	81	5.8e-07	1	AMGIMNSFVNDIFER
2759	872.413	1742.81	1742.81	-0.001	0	81	2.8e-07	1	AMGIMNSFVNDIFER
2429	729.389	1456.76	1456.76	0	0	81	3e-06	1	QQIQSIQQSIER
2376	718.375	1434.74	1434.74	0.0007	0	81	2.1e-06	1	LFIGGLNTETNEK
2141	658.9	1315.79	1315.79	-0.0001	0	80	8.7e-07	1	VFIGNLNTLVVK
2463	738.396	1474.78	1474.78	-0.0012	0	80	4.8e-05	1	FLEQQNQVLQTK
2815	894.467	1786.92	1786.92	0.0001	0	80	3.9e-07	1	TITLEVEPSDTIENVK
1613	580.811	1159.61	1159.61	-0.0005	0	80	1.8e-05	1	VSGSQIVDIDK
2507	756.424	1510.83	1510.84	-0.0022	0	80	1.9e-06	1	VPQVSTPTLVEVSR
2502	753.893	1505.77	1505.77	-0.0005	0	79	6.4e-06	1	ISSLLEEQFQQGK
2676	823.889	1645.76	1645.76	0.0011	0	79	1.7e-06	1	QDLPNAMNAAEITDK	Oxidation (M)
1528	567.305	1132.6	1132.6	-0.0014	0	79	2.9e-05	1	QDLTTLDVTK
2982	648.002	1940.98	1940.98	0.0026	1	79	7e-07	1	LNDLEDALQQAKEDLAR
1080	508.803	1015.59	1015.59	0.0001	0	79	3e-05	1	LTLSALVDGK
2692	830.369	1658.72	1658.72	-0.0001	0	79	7.5e-07	1	GGGGGQDNGLEGLGNDSR
2333	708.348	1414.68	1414.68	0.0011	0	79	1.6e-06	1	TVMENFVAFVDK	Oxidation (M)
1532	567.785	1133.56	1133.56	-0.0009	0	78	4.8e-06	1	VTLTSEEEAR
2273	695.844	1389.67	1389.67	-0.0007	0	78	1.2e-05	1	QSLEASLAETEGR
2288	697.848	1393.68	1393.68	-0.0031	0	78	2.5e-05	1	GYDVIAQAQSGTGK
1750	601.312	1200.61	1200.61	-0.0003	0	78	7.4e-05	1	QSVEADINGLR
2718	847.952	1693.89	1693.89	0.0003	0	78	6.2e-07	1	LIAPVAEEEATVPNNK
3526	758.018	2271.03	2271.03	0.001	1	78	3e-06	1	TSQNSELNNMQDLVEDYKK	Oxidation (M)
2263	691.326	1380.64	1380.64	-0.004	0	78	6.1e-07	1	ALEESNYELEGK
2486	747.37	1492.72	1492.73	-0.0024	1	77	3.7e-06	1	SQYEQLAEQNRK
3111	1017.52	2033.02	2033.02	-0.0003	0	77	2.2e-07	1	INTQWLLTSGTTEANAWK
2796	591.639	1771.9	1771.9	0.0012	1	77	2.8e-06	1	ILDSVGIEADDDRLNK
2750	859.957	1717.9	1717.9	0.0004	0	77	2.8e-06	1	IIDVVYNASNNELVR
1954	627.807	1253.6	1253.6	-0.0008	0	77	2.8e-06	1	GFSSGSAVVSGGSR
1670	590.304	1178.59	1178.59	0.0006	0	77	0.00017	1	YEELQITAGR
1899	620.848	1239.68	1239.68	-0.0004	0	77	1.2e-05	1	AEVQVLVLDGR	Acetyl (N-term)
2641	810.905	1619.8	1619.79	0.0008	0	76	1.9e-06	1	VEWSAFLEAADNLR
2156	663.38	1324.75	1324.75	-0.0006	0	76	0.00017	1	DNIQGITKPAIR
2439	731.368	1460.72	1460.72	-0.0013	1	76	4.7e-06	1	KSEIEYYAMLAK	Oxidation (M)
2467	738.888	1475.76	1474.78	0.9826	0	76	0.00017	1	FLEQQNQVLQTK
2838	899.965	1797.91	1797.91	0	0	76	1.3e-06	1	LFIGGLSFETTEESLR
1906	621.843	1241.67	1241.67	-0.0005	0	76	3.1e-05	1	AGNLGGGVVTIER
1773	603.311	1204.61	1204.61	-0.0007	0	76	1.4e-06	1	STLVGHDTFTK
2056	642.346	1282.68	1282.68	-0.0005	0	76	1.6e-06	1	VYIASSSGSTAIK
1140	516.314	1030.61	1029.61	1.0066	0	75	2.3e-05	1	LTLSALIDGK
2631	807.454	1612.89	1612.89	-0.0001	0	75	8.5e-06	1	LVINGNPITIFQER
2571	784.375	1566.74	1566.74	0.0009	0	75	6.9e-06	1	DAFLGSFLYEYSR
2227	681.349	1360.68	1360.68	-0.0005	0	74	1.6e-05	1	EVATNSELVQSGK
2799	888.408	1774.8	1774.8	-0.0012	0	74	2.6e-06	1	AMGIMNSFVNDIFER	2 Oxidation (M)
2971	966.088	1930.16	1930.16	0.0009	0	74	3.7e-06	1	VTIAQGGVLPNIQAVLLPK
2428	729.389	1456.76	1456.76	-0.0002	0	74	1e-05	1	QQIQSIQQSIER
2299	699.892	1397.77	1397.77	-0.0008	0	74	1.5e-05	1	LATQLTGPVMPVR	Oxidation (M)
2118	655.323	1308.63	1308.63	0.0006	0	74	1.1e-05	1	DVLSVAFSSDNR
2545	773.928	1545.84	1545.84	0.0005	0	74	2.9e-06	1	VLEQLTGQTPVFSK
2896	617.967	1850.88	1850.88	-0.0005	1	73	3.3e-06	1	ILENEKDLEEAEEYK
1887	617.826	1233.64	1233.64	0.0025	0	73	3.1e-06	1	VAGQDGSVVQFK
3827	837.381	2509.12	2509.12	-0.0032	0	73	4.2e-06	1	EIETYHNLLEGGQEDFESSGAGK
2649	813.378	1624.74	1624.74	0.0003	0	73	5.3e-06	1	DSLLQDGEFSMDLR
2798	888.407	1774.8	1774.8	-0.0024	0	73	2.3e-06	1	AMGIMNSFVNDIFER	2 Oxidation (M)
1908	621.856	1241.7	1241.7	-0.0004	0	73	3.9e-05	1	ADLINNLGTIAK
1633	583.295	1164.58	1164.58	-0.001	0	73	0.0004	1	LENEIQTYR
2839	900.451	1798.89	1798.89	-0.0007	0	73	3.3e-06	1	AYLPVNESFGFTADLR
2309	702.854	1403.69	1403.69	-0.0004	0	73	2e-06	1	LAPDYDALDVANK
2634	808.422	1614.83	1614.79	0.0366	0	73	1.7e-06	1	AALVDLEPGTMDSVR	Acetyl (N-term)
1806	607.314	1212.61	1212.61	0.0003	0	72	2.2e-05	1	DSPSVWAAVPGK
935	488.727	975.44	975.441	-0.0007	0	72	0.00027	1	AGFAGDDAPR
2157	663.38	1324.75	1324.75	-0.0005	0	72	0.00045	1	DNIQGITKPAIR
1871	616.819	1231.62	1231.62	0	0	72	3.8e-05	1	EELSNVLAAMR
3810	825.402	2473.18	2473.19	-0.0015	0	72	1.2e-06	1	MSGDLSSNVTVSVTSSTISSNVASK	Oxidation (M)
1770	603.311	1204.61	1204.61	-0.0012	0	72	2.8e-06	1	STLVGHDTFTK
3041	996.535	1991.06	1991.06	-0.0018	0	72	3.2e-06	1	QATTIIADNIIFLSDQTK
3000	654.973	1961.9	1961.9	-0.0019	0	72	1.9e-06	1	NAHSATTWSGQYVGGAEAR
2628	806.378	1610.74	1610.74	-0.0001	0	72	5.4e-06	1	SGDSEVYQLGDVSQK
2121	655.354	1308.69	1308.69	0.0002	0	72	2.2e-06	1	TLAFTSVDLTNK
1674	590.814	1179.61	1179.61	0.0001	0	72	2.9e-05	1	ISGLIYEETR
2100	651.862	1301.71	1301.71	0.002	0	72	7.1e-06	1	SLDLDSIIAEVK
2732	851.457	1700.9	1700.9	0.0008	0	71	1.4e-05	1	AVFVDLEPTVIDEVR
2484	746.38	1490.75	1490.75	-0.0014	0	71	5.3e-06	1	LPAAGVGDMVMATVK	2 Oxidation (M)
2580	786.91	1571.81	1571.81	-0.0006	0	71	1.1e-05	1	AQQATPGGAAPTIFSR
2506	504.263	1509.77	1509.77	-0.0003	1	71	3.6e-06	1	IVADKDYSVTANSK
3525	758.018	2271.03	2271.03	-0.0017	1	70	1.5e-05	1	TSQNSELNNMQDLVEDYKK	Oxidation (M)
1997	633.322	1264.63	1264.63	-0.0003	0	70	0.00069	1	TNAENEFVTIK
3412	741.369	2221.08	2221.08	0	0	70	4.1e-06	1	QFGFIVLTTSAGIMDHEEAR
2198	673.37	1344.73	1344.72	0.0005	0	70	2.2e-05	1	AGVNTVTTLVENK
1998	633.322	1264.63	1264.63	-0.0002	0	70	0.00072	1	TNAENEFVTIK
1794	604.812	1207.61	1207.61	0.001	0	70	5.9e-05	1	TAAENDFVTLK
2515	760.393	1518.77	1518.77	-0.0007	0	70	1.2e-05	1	LYPPDNAPLAFSSK
2772	879.442	1756.87	1756.87	-0.0016	0	70	4.2e-06	1	VYTVVDEMFLAGEIR	Oxidation (M)
3404	1108.04	2214.07	2214.06	0.0033	0	70	1.2e-05	1	DLYANTVLSGGTTMYPGIADR
2165	665.324	1328.63	1328.63	0.0009	0	70	9.8e-05	1	NVQDAIADAEQR
3264	1077.51	2153.01	2153.01	0.0004	0	70	7.5e-07	1	YDSAPATDGSGTALGWTVAWK
2266	692.349	1382.68	1382.68	0.001	0	70	3.9e-06	1	SLNNQFASFIDK
2724	849.425	1696.84	1696.83	0.0011	0	70	9.2e-07	1	TVPQSSLTMGQLYEK	Oxidation (M)
2334	708.348	1414.68	1414.68	0.0012	0	70	7.1e-06	1	TVMENFVAFVDK	Oxidation (M)
1724	597.312	1192.61	1192.61	0.0004	0	70	0.0003	1	YEELQVTVGR
1907	621.844	1241.67	1241.67	0	0	70	0.00053	1	AGNLGGGVVTIER
1557	571.861	1141.71	1141.71	0.0001	1	69	0.00097	1	KQTALVELLK
3003	654.973	1961.9	1961.9	-0.0009	0	69	3.3e-06	1	NAHSATTWSGQYVGGAEAR
1886	617.824	1233.63	1233.64	-0.0011	0	69	1.1e-05	1	VAGQDGSVVQFK
2722	849.389	1696.76	1696.77	-0.0023	0	69	5.5e-06	1	TTGFGMIYDSLDYAK	Oxidation (M)
1673	590.814	1179.61	1179.61	0	0	69	6e-05	1	ISGLIYEETR
2553	777.933	1553.85	1553.85	-0.0009	1	69	2.2e-05	1	NREPVQLETLSIR
1090	509.282	1016.55	1016.55	-0.0015	0	68	1.2e-05	1	LLVSASQDGK
1669	590.304	1178.59	1178.59	0.0004	0	68	0.0012	1	YEELQITAGR
611	437.775	873.536	873.536	-0.0002	0	68	0.00052	1	TLVLLMGK
1723	597.312	1192.61	1192.61	-0.0001	0	68	0.00047	1	YEELQVTVGR
2188	670.838	1339.66	1339.66	-0.001	1	68	1.1e-05	1	SKAEAESLYQSK
3002	654.973	1961.9	1961.9	-0.0013	0	68	8.9e-06	1	NAHSATTWSGQYVGGAEAR
1953	627.807	1253.6	1253.6	-0.0011	0	67	2.1e-05	1	GFSSGSAVVSGGSR
1481	563.274	1124.53	1124.53	-0.0014	0	67	8.8e-05	1	AEAESLYQSK
2051	640.846	1279.68	1279.68	-0.0002	0	67	0.00023	1	ATAGAYIASQTVK
1826	609.845	1217.68	1217.68	-0.0007	0	67	0.0016	1	VAQLEQVYIR
1346	542.822	1083.63	1083.63	-0.0002	0	67	0.00013	1	LITPAVVSER
1236	527.785	1053.56	1053.56	-0.0007	0	67	0.00058	1	TPGPGAQSALR
386	408.745	815.475	815.475	-0.0002	0	67	0.0023	1	VLLGETGK
1769	603.311	1204.61	1204.61	-0.0012	0	67	2.5e-05	1	STLVGHDTFTK
1413	552.333	1102.65	1102.65	0.0011	0	66	0.00017	1	ILVATNLFGR
1365	545.769	1089.52	1089.52	-0.0004	0	66	0.00093	1	VTMQNLNDR
928	487.305	972.595	972.597	-0.0014	1	66	0.0022	1	SGVSLAALKK
1438	556.327	1110.64	1110.64	0.0002	0	66	4.1e-05	1	TGAAPIIDVVR
2402	723.377	1444.74	1444.74	-0.0011	0	66	8.9e-05	1	VNDTIQIDLETGK
1925	416.563	1246.67	1246.67	-0.0004	0	66	7.7e-05	1	TPVEPEVAIHR
3006	654.973	1961.9	1961.9	0.0005	0	66	1.4e-05	1	NAHSATTWSGQYVGGAEAR
1556	571.861	1141.71	1141.71	0	1	66	0.0012	1	KQTALVELLK
1923	416.563	1246.67	1246.67	-0.0006	0	66	8.6e-05	1	TPVEPEVAIHR
2367	716.357	1430.7	1430.7	-0.0012	0	66	0.00011	1	AQAELVGTADEATR
1926	416.563	1246.67	1246.67	0.0001	0	66	8.3e-05	1	TPVEPEVAIHR
1668	590.304	1178.59	1178.59	-0.0004	0	65	0.0024	1	YEELQITAGR
1862	615.303	1228.59	1228.59	0.0006	0	65	0.00021	1	ISEQFTAMFR
2260	690.362	1378.71	1378.71	-0.0002	0	65	1.4e-05	1	STGGAPTFNVTVTK
1292	535.335	1068.65	1068.65	0.0004	0	65	0.0017	1	VGDQILLAIK
3666	1162.13	2322.24	2322.24	0.0005	0	65	3.3e-06	1	LGEIVTTIPTIGFNVETVEYK
1722	597.287	1192.56	1192.56	-0.0024	0	65	3.8e-05	1	LDLGEDYPSGK
3112	678.682	2033.02	2033.02	0.0019	0	65	1.1e-05	1	INTQWLLTSGTTEANAWK
1689	593.332	1184.65	1184.65	-0.0008	0	64	0.00018	1	IINNTENLVR
1370	546.296	1090.58	1090.58	0.001	0	64	0.00034	1	SIAFPSIGSGR
2629	806.379	1610.74	1610.74	0.0012	0	64	3.4e-05	1	SGDSEVYQLGDVSQK
1771	603.311	1204.61	1204.61	-0.0008	0	64	1.8e-05	1	STLVGHDTFTK
1632	583.295	1164.58	1164.58	-0.0018	0	64	0.00047	1	LENEIQTYR
3005	654.973	1961.9	1961.9	-0.0002	0	64	1.7e-05	1	NAHSATTWSGQYVGGAEAR
2475	743.881	1485.75	1485.75	0.0012	0	64	8e-05	1	VTPPAVTGSPEFER
3263	1077.51	2153.01	2153.01	-0.0001	0	64	1.3e-05	1	YDSAPATDGSGTALGWTVAWK
1727	597.806	1193.6	1193.59	0.004	0	64	0.00012	1	EAAENSLVAYK
1853	613.806	1225.6	1225.6	0.0001	0	63	1.5e-05	1	ALDFAVGEYNK
2673	822.473	1642.93	1642.93	0.0017	0	63	6e-06	1	TFVNITPAEVGVLVGK
2770	584.297	1749.87	1749.87	0.001	1	63	1e-05	1	ESDVPLKTEEFEVTK
1772	603.311	1204.61	1204.61	-0.0007	0	63	2.5e-05	1	STLVGHDTFTK
2032	639.359	1276.7	1276.7	0.0004	0	63	9.9e-05	1	LALDIEIATYR
1622	582.319	1162.62	1162.62	0.0005	0	63	0.00011	1	LVNELTEFAK
1357	544.314	1086.61	1086.61	0.0022	0	63	0.00089	1	ILMVGLDAAGK
1437	556.327	1110.64	1110.64	-0.0001	0	63	9.6e-05	1	TGAAPIIDVVR
1621	582.319	1162.62	1162.62	-0.0003	0	63	8.8e-05	1	LVNELTEFAK
1700	594.353	1186.69	1186.69	-0.0004	1	63	0.00027	1	RVLDELTLTK
2700	833.991	1665.97	1665.97	0.0005	0	63	9.5e-06	1	QAQIEVVPSASALIIK
2362	714.854	1427.69	1427.69	-0.0008	0	63	3.2e-05	1	LTFDTTFSPNTGK
2671	821.375	1640.74	1640.74	0.0001	0	63	0.0036	1	DSLLQDGEFSMDLR	Oxidation (M)
2909	935.492	1868.97	1868.97	-0.0005	0	63	9.1e-06	1	MAVTFIGNSTAIQELFK
2237	683.323	1364.63	1364.63	-0.0013	0	63	3.1e-05	1	SQYEQLAEQNR
2201	674.37	1346.73	1346.73	-0.0047	1	62	0.00014	1	RLEAAYLDLQR
1351	543.314	1084.61	1084.61	0.0007	0	62	0.0042	1	EIIDLVLDR
2014	635.356	1268.7	1268.7	-0.0005	0	62	0.00029	1	LSHETVTIELK
2788	882.404	1762.79	1762.8	-0.0024	0	62	8.3e-06	1	LISWYDNEFGYSNR
1379	547.864	1093.71	1093.71	0.0013	0	62	8.2e-05	1	LLEPVLLLGK
2172	666.862	1331.71	1331.71	0.0007	0	62	0.00015	1	LVIPSELGYGER
2058	642.861	1283.71	1283.71	-0.0009	0	62	5.3e-05	1	EPVQLETLSIR
3667	775.087	2322.24	2322.24	0.0027	0	62	1.1e-05	1	LGEIVTTIPTIGFNVETVEYK
1747	600.864	1199.71	1199.71	0.0005	0	62	0.00031	1	VVISLQLTAEK
1990	631.824	1261.63	1260.67	0.9584	0	62	0.00031	1	AITGASLADIMAK
1690	593.346	1184.68	1184.68	0.0005	0	62	0.00055	1	AALTLTPSAVNK
1702	594.791	1187.57	1187.57	0	0	61	0.001	1	TLEELDPESR
3440	745.406	2233.2	2233.2	0.0019	0	61	2.3e-05	1	ISQAEEEDQQLLGHLLLVAK
1767	603.309	1204.6	1204.61	-0.0058	0	61	8.8e-05	1	STLVGHDTFTK
1073	507.814	1013.61	1013.61	0.0006	0	61	0.0002	1	QTALVELLK
1656	588.728	1175.44	1174.6	0.8406	0	61	0.00057	1	IVQMTEAEVR
2215	677.857	1353.7	1353.7	-0.0013	0	61	3.1e-05	1	LSVGGGGGTGTAPPAR
1296	535.814	1069.61	1069.61	0.0007	0	61	0.00025	1	AGPNASIISLK
673	448.74	895.465	895.465	-0.0004	0	61	0.0041	1	TTIFTDAK
1999	633.322	1264.63	1264.63	0.0002	0	61	0.006	1	TNAENEFVTIK
1072	507.813	1013.61	1013.61	0.0004	0	61	0.0003	1	QTALVELLK
1541	569.277	1136.54	1136.54	-0.0004	0	61	7.7e-05	1	ESYSVYVYK
1783	603.313	1204.61	1204.61	0.0024	0	61	3.3e-05	1	STLVGHDTFTK
1948	626.825	1251.64	1251.63	0.0013	0	61	0.00015	1	YQAVTATLEEK
2465	738.396	1474.78	1474.78	-0.0004	0	60	0.0032	1	FLEQQNQVLQTK
1469	561.295	1120.58	1120.58	0.0001	0	60	0.00068	1	QEYEQLIAK
2670	821.375	1640.74	1640.74	-0.0001	0	60	0.0063	1	DSLLQDGEFSMDLR	Oxidation (M)
3828	837.382	2509.12	2509.12	-0.0013	0	60	2.4e-05	1	EIETYHNLLEGGQEDFESSGAGK
1924	624.341	1246.67	1246.67	-0.0005	0	60	0.00019	1	TPVEPEVAIHR
926	487.269	972.524	972.488	0.0362	0	60	0.0096	1	AEISELNR	Acetyl (N-term)
2647	813.377	1624.74	1624.74	-0.0002	0	60	2.9e-05	1	DSLLQDGEFSMDLR
808	466.24	930.465	930.466	-0.0008	0	60	5.3e-05	1	GPSSVEDIK
1922	624.34	1246.67	1246.67	-0.0011	0	60	0.0003	1	TPVEPEVAIHR
1687	593.293	1184.57	1184.57	0.0001	0	60	0.00011	1	TLGDFAAEYAK
1260	530.785	1059.56	1059.56	0.0005	0	60	0.0005	1	TLLDIDNTR
2259	690.362	1378.71	1378.71	-0.0002	0	60	6.8e-05	1	STGGAPTFNVTVTK
3277	721.703	2162.09	2162.09	0.0019	1	59	1.8e-05	1	REEEEFNTGPLSVLTQSVK
1725	597.312	1192.61	1192.61	0.0009	0	59	0.0013	1	YEELQVTVGR
2949	639.026	1914.06	1914.06	0	1	59	0.00012	1	TFVNITPAEVGVLVGKDR
1807	607.314	1212.61	1212.61	0.0005	0	59	0.00013	1	DSPSVWAAVPGK
2252	689.379	1376.74	1376.74	0.0022	0	59	2.5e-05	1	AQAAAPASVPAQAPK
521	426.753	851.491	851.49	0.0002	0	59	0.0087	1	IGGIFAFK
2755	868.907	1735.8	1735.8	0.0009	0	59	2.8e-05	1	YEEENFYLEPYLK
2093	650.768	1299.52	1299.52	-0.0003	0	59	0.0001	1	NMQDMVEDYR
841	472.769	943.524	943.524	-0.0004	0	59	0.0032	1	AGLQFPVGR
837	472.229	942.444	942.445	-0.0004	0	59	0.0012	1	TDLFYER
1615	581.313	1160.61	1160.61	0.0007	0	59	0.00031	1	EITALAPSTMK
2239	683.345	1364.68	1364.68	-0.0004	0	59	2.5e-05	1	VQNMALYADVGGK
3727	793.068	2376.18	2376.18	0.0008	1	59	3e-05	1	LASYLDKVQALEEANNDLENK
287	386.227	770.44	770.44	-0.0002	0	59	0.013	1	QAGVAIGR
1458	559.798	1117.58	1117.58	0.0045	0	59	0.00018	1	SADTLWGIQK
3446	746.701	2237.08	2237.08	0.0015	0	58	1.3e-05	1	QFGFIVLTTSAGIMDHEEAR	Oxidation (M)
318	393.266	784.517	784.517	-0.0001	1	58	0.013	1	KLQIGVK
1445	557.845	1113.68	1113.68	0.0005	0	58	0.00056	1	VLITTDLLAR
1832	610.339	1218.66	1218.66	0.0024	0	58	0.00011	1	DFLAGGVAAAISK
986	495.768	989.521	989.521	-0.0005	0	58	0.0026	1	MNVLADALK	Oxidation (M)
2973	644.702	1931.08	1931.08	-0.0003	0	58	5.4e-05	1	IIKPLQYQSTVASGTVAR
987	495.768	989.522	989.521	0.0006	0	58	0.0033	1	MNVLADALK	Oxidation (M)
923	486.79	971.566	971.565	0.0005	0	58	0.00074	1	AALQELLSK
744	457.787	913.559	913.56	-0.0007	0	58	0.0012	1	QTVAVGVIK
1278	533.803	1065.59	1065.59	-0.0027	0	58	0.00034	1	TALIHDGLAR
2664	547.319	1638.93	1638.93	0.0044	1	58	2.4e-05	1	KVPQVSTPTLVEVSR
2687	827.423	1652.83	1652.83	0.0026	0	58	0.00014	1	DISEASVFDAYVLPK
2206	675.885	1349.76	1349.76	-0.0005	0	58	0.00026	1	LIDLHSPSEIVK
1363	545.319	1088.62	1088.62	0.0002	0	58	0.0014	1	DAVLLVFANK
2552	777.933	1553.85	1553.85	-0.0011	1	57	0.0015	1	NREPVQLETLSIR
1550	570.84	1139.66	1139.67	-0.0014	0	57	0.00048	1	ATQALVLAPTR
2694	830.895	1659.78	1659.78	-0.0019	0	57	1.9e-05	1	VLNSYWVGEDSTYK
349	401.245	800.475	800.476	-0.0006	0	57	0.02	1	ALQASALK
1617	581.315	1160.62	1159.61	1.007	0	57	0.0064	1	ISDIQSQLEK
2300	700.35	1398.69	1398.69	0.0008	0	57	3.6e-05	1	TVMENFVAFVDK
2813	596.31	1785.91	1784.91	0.9995	0	57	0.00012	1	VMLGETNPADSKPGTIR
1715	596.323	1190.63	1190.63	0.0017	0	57	0.0044	1	LEAAYLDLQR
1705	594.827	1187.64	1187.64	0.0007	0	57	0.0047	1	IDTIEIITDR
2078	647.337	1292.66	1292.66	-0.0007	0	57	5.3e-05	1	YQLDPTASISAK
2283	697.371	1392.73	1392.72	0.0028	1	57	0.015	1	TNAENEFVTIKK
1139	516.303	1030.59	1030.59	0.0005	0	57	0.00088	1	VLDELTLTK
3447	746.701	2237.08	2237.08	0.0019	0	57	2e-05	1	QFGFIVLTTSAGIMDHEEAR	Oxidation (M)
2476	744.354	1486.69	1486.69	0.0003	0	57	4e-05	1	TTPSYVAFTDTER
745	457.787	913.559	913.56	-0.0007	0	57	0.0018	1	QTVAVGVIK
1756	602.322	1202.63	1202.63	-0.0005	0	57	0.00029	1	WTLLQEQGTK
2527	764.379	1526.74	1526.74	-0.0005	0	57	0.00012	1	LVQSPNSYFMDVK
1645	585.805	1169.6	1169.6	-0.001	0	56	0.00072	1	FLDGIYVSEK
3448	746.701	2237.08	2237.08	0.003	0	56	1.9e-05	1	QFGFIVLTTSAGIMDHEEAR	Oxidation (M)
1859	614.861	1227.71	1227.71	0.0009	0	56	0.00049	1	VSEQGLIEILK
1816	608.333	1214.65	1214.65	0.0004	0	56	0.00041	1	NAGVEGSLIVEK
1975	629.849	1257.68	1257.68	0.0022	1	56	0.00028	1	EKLEATINELV
1709	595.808	1189.6	1189.6	0.0009	0	56	0.0013	1	QVLDNLTMEK
1115	513.309	1024.6	1024.6	0.0003	0	56	0.0077	1	IGGIGTVPVGR
1014	499.251	996.487	996.488	-0.0009	0	56	0.00033	1	LSYNTASNK
882	478.779	955.544	955.545	-0.0008	0	56	0.021	1	AAAAAAALQAK
3103	678.356	2032.05	2032.05	-0.0015	0	56	3.5e-05	1	FTASAGIQVVGDDLTVTNPK
860	476.243	950.471	950.471	0.0003	0	56	0.0011	1	ADGYVLEGK
3001	654.973	1961.9	1961.9	-0.0017	0	56	7e-05	1	NAHSATTWSGQYVGGAEAR
2017	423.907	1268.7	1268.7	0.0004	0	56	0.0029	1	LSHETVTIELK
2627	805.891	1609.77	1609.77	0.0003	0	56	6.8e-05	1	VLYAYGYYTGEPSK
2607	795.889	1589.76	1589.76	0.0026	0	56	5.1e-05	1	GTAYVVYEDIFDAK
382	407.737	813.459	813.46	-0.0006	0	56	0.025	1	IQLPSEK
3050	665.331	1992.97	1992.97	0.0016	0	56	0.00037	1	THNLEPYFESFINNLR
927	487.269	972.524	972.488	0.0366	0	56	0.026	1	AEISELNR	Acetyl (N-term)
1799	606.341	1210.67	1210.67	0.0005	0	56	0.00027	1	QITVNDLPVGR
1530	567.774	1133.53	1133.54	-0.001	0	56	0.0013	1	DAVTYTEHAK
1781	603.312	1204.61	1204.61	0.0003	0	56	8.9e-05	1	STLVGHDTFTK
2669	821.375	1640.73	1640.74	-0.0004	0	56	0.018	1	DSLLQDGEFSMDLR	Oxidation (M)
931	487.771	973.527	973.527	0.0002	0	56	0.0021	1	MNVLADALK
2329	706.399	1410.78	1410.78	-0.0006	0	55	0.00021	1	GALQNIIPASTGAAK
2097	651.337	1300.66	1300.65	0.0084	0	55	0.023	1	ALEEANADLEVK
1995	632.843	1263.67	1263.67	-0.0004	0	55	4.9e-05	1	QVVESAYEVIK
2084	648.833	1295.65	1294.65	0.9993	0	55	0.0027	1	AGASPPPVSELDR
1788	604.332	1206.65	1206.65	-0.0003	0	55	0.00066	1	ITVTSEVPFSK
842	472.769	943.524	943.524	0.0004	0	55	0.0073	1	AGLQFPVGR
843	472.769	943.524	943.524	0.0005	0	55	0.012	1	AGLQFPVGR
2483	746.379	1490.74	1490.75	-0.0037	0	55	0.00096	1	LPAAGVGDMVMATVK	2 Oxidation (M)
2075	646.32	1290.62	1290.63	-0.0054	0	55	0.00027	1	ELISNSSDALDK
2102	652.366	1302.72	1302.72	-0.0007	0	55	0.00027	1	VLTPELYAELR
2166	665.334	1328.65	1328.65	0.0023	0	55	0.00048	1	GFAFVQYVNER
2258	690.362	1378.71	1378.71	-0.0003	0	55	0.00027	1	STGGAPTFNVTVTK
1958	628.846	1255.68	1255.68	-0.0002	0	55	0.00016	1	NIEDVIAQGIGK
1710	595.861	1189.71	1189.71	0.001	0	55	8e-05	1	VANVSLLALYK
1171	520.269	1038.52	1038.52	-0.0003	0	55	0.00051	1	ESSTVFELK
2015	635.356	1268.7	1268.7	-0.0004	0	55	0.00061	1	LSHETVTIELK
1827	406.909	1217.71	1217.71	0.0001	1	55	0.0022	1	TDKTLVLLMGK
1789	604.332	1206.65	1206.65	0.0004	0	55	0.00071	1	ITVTSEVPFSK
85	336.226	670.438	670.401	0.0363	0	54	0.024	1	ANALIK	Acetyl (N-term)
1134	515.319	1028.62	1028.62	-0.0001	0	54	0.0081	1	TEIIILATR
2454	735.888	1469.76	1469.76	-0.0001	0	54	0.00021	1	DEILPTTPISEQK
2171	666.811	1331.61	1331.61	-0.0003	0	54	8.2e-05	1	GAEIEYAMAYSK
332	395.24	788.465	788.464	0.0006	0	54	0.038	1	LVTDLTK
1109	512.282	1022.55	1022.55	-0.0021	0	54	0.0052	1	EGVHGGLINK
2016	423.906	1268.7	1268.7	0.0001	0	54	0.0049	1	LSHETVTIELK
1167	519.267	1036.52	1036.52	0.0004	0	54	0.0012	1	YLDGLTAER
1745	600.793	1199.57	1199.57	-0.0001	0	54	8.5e-05	1	EDSAVFYELK
2821	895.948	1789.88	1789.88	-0.0022	0	54	0.00065	1	SYELPDGQVITIGNER
3212	700.053	2097.14	2096.15	0.9879	1	54	4.2e-05	1	VISELNGKNIEDVIAQGIGK
1280	533.804	1065.59	1065.59	-0.0003	0	54	0.0037	1	TALIHDGLAR
1785	603.805	1205.6	1205.6	-0.0009	0	54	0.00022	1	QVLDNLTMEK	Oxidation (M)
2298	699.875	1397.73	1397.73	0.0003	0	54	0.00044	1	TTPDVIFVFGFR
706	452.713	903.412	903.412	-0.0001	0	54	0.0076	1	EMGTPDVR
761	460.266	918.518	918.518	0	0	54	0.0041	1	LSSLPFQK
1952	627.801	1253.59	1253.59	0.0007	0	54	0.00052	1	MNPQSAFFQGK
1580	576.285	1150.56	1150.55	0.0004	0	54	0.00041	1	ESYSIYVYK
2000	633.323	1264.63	1264.63	-0.0015	1	54	0.00062	1	KESYSVYVYK
627	442.253	882.492	882.492	-0.0002	0	54	0.017	1	VGQDPVLR
1828	406.909	1217.71	1217.71	0.0006	1	53	0.0021	1	TDKTLVLLMGK
2106	653.361	1304.71	1304.71	-0.0005	0	53	0.00017	1	HLVDEPQNLIK
2596	793.885	1585.75	1585.76	-0.0036	0	53	0.0012	1	VQALEEANNDLENK
2390	480.609	1438.8	1438.8	0.0003	1	53	0.0022	1	RHPEYAVSVLLR
1637	584.801	1167.59	1167.59	-0.0005	0	53	0.00025	1	QVHPDTGISSK
1045	504.282	1006.55	1006.55	0.001	0	53	0.0009	1	VVFVFGPDK
834	471.772	941.529	941.529	-0.0003	0	53	0.004	1	NIVEAAAVR
65	330.177	658.339	658.34	-0.0005	1	53	0.06	1	GGKEAR	Acetyl (N-term)
1738	599.84	1197.67	1197.66	0.0048	0	53	0.0004	1	ASGPPVSELITK
1554	571.777	1141.54	1141.54	-0.0011	0	53	0.00068	1	EAPEGWQTPK
3416	742.369	2224.09	2224.09	-0.0053	0	53	0.00014	1	NGTQVHGTITGVDVSMNTHLK	Oxidation (M)
1787	604.279	1206.54	1206.54	-0.0006	0	53	0.00063	1	SEMTPEELQK	Oxidation (M)
2473	494.937	1481.79	1481.79	-0.001	1	53	0.00016	1	TVTAMDVVYALKR	Oxidation (M)
1768	603.311	1204.61	1204.61	-0.0017	0	53	0.00052	1	STLVGHDTFTK
3083	672.993	2015.96	2015.96	-0.0006	0	53	0.00016	1	FVEQLGSYDPLPNSHGEK
1699	594.33	1186.65	1186.65	-0.0003	0	53	0.00051	1	GPLQSVQVFGR
1628	582.81	1163.61	1162.62	0.9821	0	53	0.00081	1	LVNELTEFAK
566	433.753	865.491	865.491	-0.0002	0	53	0.0034	1	FVIATSTK
2410	725.407	1448.8	1448.8	-0.0001	0	53	0.0018	1	FVTVQTISGTGALR
2636	809.411	1616.81	1616.81	-0.0005	0	53	0.00011	1	AVLVDLEPGTMDSVR	Oxidation (M)
1349	543.303	1084.59	1084.59	0.0003	0	52	0.0018	1	LPFPIIDDR
1332	540.28	1078.55	1078.54	0.0014	0	52	0.0027	1	EGPFYPTLR
884	479.253	956.492	956.493	-0.0004	0	52	0.00071	1	VPETVADAR
1286	534.314	1066.61	1066.61	-0.0002	0	52	0.0081	1	ESTLHLVLR
1765	602.832	1203.65	1203.65	-0.0005	0	52	0.0011	1	EFVEAVLELR
1941	625.84	1249.67	1249.67	-0.0009	0	52	0.00029	1	TNSTFNQVVLK
2064	643.859	1285.7	1285.7	0.0007	0	52	0.00059	1	LPVPESITGFAR
1165	519.266	1036.52	1036.52	-0.0009	0	52	0.0073	1	YLDGLTAER
2511	506.239	1515.69	1515.7	-0.0007	0	52	0.001	1	QEYDESGPSIVHR
3426	742.7	2225.08	2224.09	0.9879	0	52	0.00021	1	NGTQVHGTITGVDVSMNTHLK	Oxidation (M)
1136	515.798	1029.58	1029.58	0.0002	0	52	0.00083	1	LIVENLSSR
967	493.306	984.597	984.597	0.0003	0	52	0.0039	1	QTAAQLILK
2155	663.38	1324.75	1324.75	-0.0011	0	52	0.037	1	DNIQGITKPAIR
1872	616.835	1231.66	1231.66	0.0001	0	51	0.0017	1	LWTLVSEQTR
1717	596.783	1191.55	1191.55	-0.001	0	51	0.00051	1	DETNYGIPQR
1870	616.812	1231.61	1231.61	0	0	51	0.0013	1	DLFDPIIEDR
3276	721.009	2160	2160	0.0004	0	51	0.036	1	DELHIVEAEAMNYEGSPIK	Oxidation (M)
3278	721.703	2162.09	2162.09	0.002	1	51	0.0015	1	REEEEFNTGPLSVLTQSVK
2643	811.386	1620.76	1620.76	-0.0005	0	51	0.00067	1	NPPGFAFVEFEDPR
1830	610.325	1218.64	1218.64	0.0007	0	51	0.0013	1	EYNALVAQGVR
1396	550.767	1099.52	1099.52	0.0002	0	51	0.00058	1	QEGDTFYIK
1423	554.287	1106.56	1106.56	-0.0008	0	51	0.0014	1	ALAAAGYDVEK
2139	658.765	1315.52	1315.52	-0.0012	0	51	0.00026	1	NMQDMVEDYR	Oxidation (M)
2107	653.361	1304.71	1304.71	-0.0005	0	50	0.00036	1	HLVDEPQNLIK
2216	677.868	1353.72	1353.73	-0.0031	0	50	0.00035	1	ALGQNPTNAEVLK
1733	598.819	1195.62	1195.62	-0.0001	0	50	0.00053	1	LVQAFQFTDK
1138	516.303	1030.59	1030.59	0.0003	0	50	0.0026	1	VLDELTLTK
2054	642.331	1282.65	1282.65	-0.0009	0	50	0.00024	1	MVVESAYEVIK	Oxidation (M)
975	494.774	987.534	987.535	-0.0012	0	50	0.0055	1	SAINEVVTR
1239	528.274	1054.53	1054.53	0.0004	0	50	0.0018	1	VSFELFADK
930	487.77	973.526	973.527	-0.0007	0	50	0.0094	1	MNVLADALK
1921	624.34	1246.67	1246.67	-0.0014	0	50	0.00097	1	TPVEPEVAIHR
1195	523.285	1044.55	1044.56	-0.0014	0	50	0.059	1	LSSPATLNSR
958	492.275	982.536	982.535	0.0013	0	50	0.0044	1	HGSLGFLPR
1994	632.83	1263.65	1263.65	0	0	50	0.0071	1	LWDLTTGTTTR
2313	703.336	1404.66	1404.66	0.0013	0	50	0.00086	1	FFDEESYSLLR
477	421.759	841.503	841.502	0.0004	0	50	0.073	1	VATVSLPR
583	435.773	869.531	869.497	0.0344	0	50	0.066	1	GVSLLSPR	Acetyl (N-term)
684	449.803	897.59	897.59	0.0005	0	50	0.006	1	VVDLLVIK
1436	556.311	1110.61	1110.61	0.0009	0	50	0.0015	1	AYELALYLR
2218	679.362	1356.71	1356.71	-0.001	1	50	0.0023	1	QSVEADINGLRR
1033	502.756	1003.5	1003.5	0	0	50	0.0087	1	YGINTDPPK
833	471.772	941.529	941.529	-0.0006	0	50	0.0049	1	NIVEAAAVR
2281	465.248	1392.72	1392.72	-0.0018	1	50	0.083	1	TNAENEFVTIKK

## Sheet: MINAS-60_protein
Accession	Score	Mass	Num. of matches	Num. of significant matches	Num. of sequences	Num. of significant sequences	emPAI	Description
P00761	2731	24394	134	134	6	6	2.4	SWISS-PROT:P00761|TRYP_PIG Trypsin - Sus scrofa (Pig).
Streptavidin	1424	16612	39	39	4	4	1.43	(S.avidinii)
P13645	978	59475	30	30	20	20	3.05	SWISS-PROT:P13645 Tax_Id=9606 Gene_Symbol=KRT10 Keratin, type I cytoskeletal 10
P02533	157	51589	6	6	5	5	0.44	SWISS-PROT:P02533 Tax_Id=9606 Gene_Symbol=KRT14 Keratin, type I cytoskeletal 14
P04264	696	65978	30	30	17	17	2.15	SWISS-PROT:P04264 Tax_Id=9606 Gene_Symbol=KRT1 Keratin, type II cytoskeletal 1
P35908	635	65825	24	24	15	15	1.37	SWISS-PROT:P35908 Tax_Id=9606 Gene_Symbol=KRT2 Keratin, type II cytoskeletal 2 epidermal
P13647	85	62340	4	4	4	4	0.27	SWISS-PROT:P13647 Tax_Id=9606 Gene_Symbol=KRT5 Keratin, type II cytoskeletal 5
ENST00000369167.1_(+1)_2	657	15007	21	21	5	5	4.59	>ENST00000369167.1_(+1)_2
ENST00000303806.4_(+3)	604	15080	17	17	5	5	4.52	>ENST00000303806.4_(+3)
P35527	595	62092	21	21	14	14	1.5	SWISS-PROT:P35527 Tax_Id=9606 Gene_Symbol=KRT9 Keratin, type I cytoskeletal 9
P02769	565	69248	20	20	11	11	0.93	SWISS-PROT:P02769 (Bos taurus) Bovine serum albumin precursor
ENST00000225655.5_(+3)_4	519	22197	23	23	8	8	4.36	ENST00000225655.5_(+3)_4
ENST00000245857.5_(+1)_6	365	15287	8	8	2	2	1.62	ENST00000245857.5_(+1)_6
ENST00000563390.1_(+2)_3	279	16751	14	14	5	5	3.69	ENST00000563390.1_(+2)_3
ENST00000300413.5_(+2)_3	271	16225	14	14	4	4	2.13	ENST00000300413.5_(+2)_3
P60712	270	41710	9	9	6	6	1.06	SWISS-PROT:P60712 (Bos taurus) Actin, cytoplasmic 1
ENST00000265304.6_(+2)_4	253	17947	7	7	5	5	1.8	ENST00000265304.6_(+2)_4
ENST00000256682.4_(+3)_3	248	24375	6	6	4	4	1.15	ENST00000256682.4_(+3)_3
ENST00000355057.1_(+2)	247	12068	12	12	6	6	7.29	ENST00000355057.1_(+2)
ENST00000009589.3_(+1)_2	218	15432	8	8	3	3	1.05	ENST00000009589.3_(+1)_2
CUFF.4153.1_(+1)_2	198	41324	5	5	5	5	0.58	>CUFF.4153.1_(+1)_2
CUFF.18568.2_(+2)_2	194	41218	6	6	5	5	0.73	CUFF.18568.2_(+2)_2
ENST00000327892.8_(+1)_3	182	49966	6	6	5	5	0.57	ENST00000327892.8_(+1)_3
ENST00000340384.4_(+2)_3	106	52207	4	4	4	4	0.34	ENST00000340384.4_(+2)_3
CUFF.4848.5_(+3)_2	177	38849	6	6	5	5	0.79	CUFF.4848.5_(+3)_2
ENST00000287038.3_(+2)_3	173	13117	7	7	2	2	2.06	ENST00000287038.3_(+2)_3
ENST00000084795.5_(+2)	169	21715	3	3	3	3	0.67	ENST00000084795.5_(+2)
CUFF.16210.12_(+1)_4	169	13519	5	5	4	4	1.96	CUFF.16210.12_(+1)_4
ENST00000396651.3_(+2)_4	164	25506	6	6	5	5	1.08	ENST00000396651.3_(+2)_4
ENST00000321153.4_(+2)_6	160	12706	5	5	4	4	2.18	ENST00000321153.4_(+2)_6
CUFF.12088.2_(+2)_3	157	15250	4	4	3	3	1.07	CUFF.12088.2_(+2)_3
ENSEMBL:ENSBTAP00000016242	153	50148	5	5	5	5	0.46	(Bos taurus) similar to alpha-tubulin I isoform 1
ENST00000588301.1_(+1)_2	150	14248	7	7	3	3	1.82	ENST00000588301.1_(+1)_2
ENST00000348956.2_(+2)_2	140	47180	3	3	3	3	0.27	ENST00000348956.2_(+2)_2
ENST00000526608.1_(+3)	139	25597	4	4	4	4	0.79	ENST00000526608.1_(+3)
ENST00000261313.2_(+2)_2	136	26936	1	1	1	1	0.15	ENST00000261313.2_(+2)_2
CUFF.2460.1_(+2)_5	132	16943	5	5	2	2	0.55	>CUFF.2460.1_(+2)_5
CUFF.20134.2_(+3)	102	17093	6	6	3	3	0.91	CUFF.20134.2_(+3)
ENST00000511473.1_(+3)_2	132	31057	5	5	5	5	0.83	ENST00000511473.1_(+3)_2
CUFF.191.4_(+3)	132	21296	4	4	2	2	0.42	CUFF.191.4_(+3)
ENST00000037243.2_(+2)	131	18892	4	4	4	4	1.2	ENST00000037243.2_(+2)
ENST00000396859.1_(+2)_2	131	37848	3	3	3	3	0.35	ENST00000396859.1_(+2)_2
ENST00000539854.1_(+1)	130	12879	2	2	2	2	0.77	>ENST00000539854.1_(+1)
CUFF.2918.4_(+1)_2	130	32283	3	3	3	3	0.42	CUFF.2918.4_(+1)_2
CUFF.17794.8_(+1)_7	129	6632	4	4	4	4	7.36	CUFF.17794.8_(+1)_7
ENST00000293831.8_(+2)_2	126	46654	4	4	4	4	0.38	ENST00000293831.8_(+2)_2
ENST00000355257.3_(+3)_4	124	14692	5	5	3	3	1.13	ENST00000355257.3_(+3)_4
ENST00000234590.4_(+1)_3	122	47516	2	2	1	1	0.08	ENST00000234590.4_(+1)_3
ENST00000347512.3_(+3)_3	121	14706	7	7	3	3	1.73	ENST00000347512.3_(+3)_3
ENST00000367886.2_(+1)	117	18405	3	3	3	3	0.83	ENST00000367886.2_(+1)
ENST00000401695.3_(+3)	111	18077	2	2	2	2	0.51	ENST00000401695.3_(+3)
CUFF.9888.4_(+3)	111	16711	2	2	1	1	0.25	CUFF.9888.4_(+3)
ENST00000492974.2_(+1)	110	16612	3	3	2	2	0.56	ENST00000492974.2_(+1)
ENST00000335181.5_(+3)	110	61398	1	1	1	1	0.06	ENST00000335181.5_(+3)
ENST00000374517.5_(+2)	108	18463	2	2	2	2	0.5	ENST00000374517.5_(+2)
ENST00000354926.4_(+1)_2	107	57480	1	1	1	1	0.07	ENST00000354926.4_(+1)_2
ENST00000262947.3_(+1)_3	107	18984	3	3	2	2	0.48	ENST00000262947.3_(+1)_3
ENST00000373669.2_(+3)_2	106	16713	2	2	2	2	0.55	ENST00000373669.2_(+3)_2
ENST00000225525.3_(+1)_3	106	16389	1	1	1	1	0.25	ENST00000225525.3_(+1)_3
ENST00000330752.8_(+1)	105	34266	1	1	1	1	0.12	ENST00000330752.8_(+1)
ENST00000449098.1_(+3)_3	102	33060	2	2	2	2	0.25	ENST00000449098.1_(+3)_3
ENST00000259667.5_(+1)	101	18661	2	2	2	2	0.49	ENST00000259667.5_(+1)
ENST00000424500.1_(+1)	100	23284	2	2	2	2	0.38	ENST00000424500.1_(+1)
CUFF.21728.6_(+3)_4	100	50888	5	5	3	3	0.25	CUFF.21728.6_(+3)_4
ENST00000355731.4_(+3)	99	17681	5	5	4	4	1.32	>ENST00000355731.4_(+3)
ENST00000263270.6_(+2)_2	99	19957	3	3	3	3	0.75	ENST00000263270.6_(+2)_2
ENST00000184266.2_(+1)	97	17035	1	1	1	1	0.24	ENST00000184266.2_(+1)
ENST00000430157.2_(+2)	96	18472	2	2	2	2	0.5	ENST00000430157.2_(+2)
ENST00000356674.7_(+2)	95	41758	2	2	2	2	0.2	ENST00000356674.7_(+2)
CUFF.13484.1_(+1)_4	95	13489	2	2	2	2	0.72	CUFF.13484.1_(+1)_4
ENST00000340385.5_(+1)	93	29875	3	3	3	3	0.46	ENST00000340385.5_(+1)
ENST00000317881.8_(+3)	92	36813	5	5	5	5	0.67	ENST00000317881.8_(+3)
CUFF.23641.1_(+3)_4	92	11583	2	2	2	2	0.88	CUFF.23641.1_(+3)_4
ENST00000370086.3_(+2)	92	20743	3	3	3	3	0.71	ENST00000370086.3_(+2)
ENST00000440936.1_(+1)	92	39340	2	2	2	2	0.21	ENST00000440936.1_(+1)
ENST00000371646.5_(+2)	90	87263	3	3	3	3	0.14	ENST00000371646.5_(+2)
ENST00000343677.2_(+2)	91	22842	3	3	3	3	0.63	ENST00000343677.2_(+2)
CUFF.18137.10_(+1)_5	90	40109	3	3	3	3	0.33	CUFF.18137.10_(+1)_5
ENST00000476371.1_(+3)	88	15675	1	1	1	1	0.27	ENST00000476371.1_(+3)
CUFF.22232.1_(+1)_2	87	13193	4	4	1	1	0.32	>CUFF.22232.1_(+1)_2
CUFF.20836.3_(+2)_2	87	14526	1	1	1	1	0.29	CUFF.20836.3_(+2)_2
ENST00000540179.1_(+1)	85	13580	2	2	2	2	0.72	ENST00000540179.1_(+1)
ENST00000356464.5_(+3)_9	85	14762	3	3	2	2	0.65	>ENST00000356464.5_(+3)_9
ENST00000298556.7_(+1)	83	30394	1	1	1	1	0.13	ENST00000298556.7_(+1)
ENST00000309311.6_(+3)	82	98239	2	2	2	2	0.08	ENST00000309311.6_(+3)
ENST00000251453.3_(+3)_2	82	16864	2	2	2	2	0.55	ENST00000251453.3_(+3)_2
CUFF.1154.7_(+3)_7	81	43533	1	1	1	1	0.09	>CUFF.1154.7_(+3)_7
ENST00000221448.5_(+2)_2	81	56894	2	2	2	2	0.14	ENST00000221448.5_(+2)_2
CUFF.9938.2_(+3)_3	80	10584	9	9	2	2	0.99	CUFF.9938.2_(+3)_3
ENST00000368222.3_(+3)_4	80	16716	4	4	4	4	1.42	ENST00000368222.3_(+3)_4
CUFF.23141.1_(+3)_2	79	51814	1	1	1	1	0.08	CUFF.23141.1_(+3)_2
ENST00000371514.3_(+1)	78	64555	3	3	3	3	0.19	ENST00000371514.3_(+1)
CUFF.3890.1_(+2)_2	76	16522	2	2	2	2	0.56	CUFF.3890.1_(+2)_2
ENST00000373212.5_(+1)_3	76	15374	1	1	1	1	0.27	ENST00000373212.5_(+1)_3
ENST00000022615.4_(+3)_3	75	30754	1	1	1	1	0.13	ENST00000022615.4_(+3)_3
ENST00000319248.8_(+2)	75	27003	2	2	2	2	0.32	ENST00000319248.8_(+2)
ENST00000321566.6_(+1)	74	30151	2	2	2	2	0.28	>ENST00000321566.6_(+1)
CUFF.8966.1_(+1)_2	74	17720	1	1	1	1	0.23	CUFF.8966.1_(+1)_2
ENST00000262306.7_(+3)	74	18915	2	2	2	2	0.48	ENST00000262306.7_(+3)
CUFF.376.3_(+1)	74	23887	1	1	1	1	0.17	CUFF.376.3_(+1)
ENST00000230048.4_(+2)_2	72	17357	1	1	1	1	0.24	ENST00000230048.4_(+2)_2
ENST00000216252.3_(+1)_3	71	12638	2	2	2	2	0.78	ENST00000216252.3_(+1)_3
ENST00000334121.6_(+1)_2	70	73188	1	1	1	1	0.05	ENST00000334121.6_(+1)_2
CUFF.19911.4_(+3)	70	18323	3	3	3	3	0.84	CUFF.19911.4_(+3)
CUFF.18479.1_(+3)_2	68	38226	1	1	1	1	0.1	>CUFF.18479.1_(+3)_2
ENST00000307839.5_(+1)_2	67	24330	2	2	2	2	0.36	>ENST00000307839.5_(+1)_2
ENST00000361611.6_(+1)_6	67	29296	1	1	1	1	0.14	ENST00000361611.6_(+1)_6
CUFF.14709.1_(+3)_6	67	16321	1	1	1	1	0.25	CUFF.14709.1_(+3)_6
ENST00000270625.2_(+3)	67	21406	1	1	1	1	0.19	ENST00000270625.2_(+3)
ENST00000415382.2_(+2)	66	47916	1	1	1	1	0.08	ENST00000415382.2_(+2)
CUFF.23720.4_(+3)_3	66	27069	1	1	1	1	0.15	CUFF.23720.4_(+3)_3
CUFF.16446.1_(+3)_2	66	16591	6	6	2	2	0.56	CUFF.16446.1_(+3)_2
ENST00000215375.2_(+3)	66	21016	1	1	1	1	0.19	ENST00000215375.2_(+3)
CUFF.21557.1_(+1)_2	65	17956	3	3	3	3	0.86	>CUFF.21557.1_(+1)_2
CUFF.16659.6_(+2)	65	97792	1	1	1	1	0.04	CUFF.16659.6_(+2)
ENST00000376588.3_(+3)	64	42786	1	1	1	1	0.09	ENST00000376588.3_(+3)
ENST00000265498.1_(+1)_3	64	20981	1	1	1	1	0.19	ENST00000265498.1_(+1)_3
ENST00000264335.8_(+2)_2	64	32736	1	1	1	1	0.12	>ENST00000264335.8_(+2)_2
CUFF.15589.4_(+1)_2	63	15987	1	1	1	1	0.26	>CUFF.15589.4_(+1)_2
ENST00000394667.3_(+3)	63	15039	2	2	2	2	0.64	ENST00000394667.3_(+3)
ENST00000590247.2_(+3)_4	63	14660	3	3	2	2	0.65	ENST00000590247.2_(+3)_4
ENST00000361436.5_(+2)	63	21137	1	1	1	1	0.19	ENST00000361436.5_(+2)
ENST00000409733.1_(+2)_5	62	14454	2	2	2	2	0.67	ENST00000409733.1_(+2)_5
ENST00000394077.3_(+2)_3	62	19557	1	1	1	1	0.21	ENST00000394077.3_(+2)_3
ENST00000426679.1_(+1)	62	14168	1	1	1	1	0.3	ENST00000426679.1_(+1)
ENST00000330133.4_(+2)	61	17182	1	1	1	1	0.24	ENST00000330133.4_(+2)
CUFF.2992.4_(+2)_3	61	15657	2	2	2	2	0.6	CUFF.2992.4_(+2)_3
ENST00000296122.6_(+1)	61	43901	1	1	1	1	0.09	ENST00000296122.6_(+1)
CUFF.23180.2_(+3)_8	61	15654	1	1	1	1	0.27	CUFF.23180.2_(+3)_8
ENST00000257829.3_(+3)_2	61	116052	1	1	1	1	0.03	ENST00000257829.3_(+3)_2
CUFF.19015.2_(+3)_2	61	18653	2	2	2	2	0.49	CUFF.19015.2_(+3)_2
CUFF.2197.2_(+3)_7	60	102183	1	1	1	1	0.04	CUFF.2197.2_(+3)_7
ENST00000294189.6_(+2)	59	20630	1	1	1	1	0.2	ENST00000294189.6_(+2)
CUFF.21624.7_(+3)_5	59	15811	1	1	1	1	0.26	CUFF.21624.7_(+3)_5
ENST00000547649.1_(+2)_2	59	17248	2	2	2	2	0.54	ENST00000547649.1_(+2)_2
CUFF.22398.5_(+1)_3	59	51239	2	2	2	2	0.16	CUFF.22398.5_(+1)_3
CUFF.550.1_(+1)	58	95553	1	1	1	1	0.04	CUFF.550.1_(+1)
ENST00000393427.2_(+3)_2	58	16397	2	2	2	2	0.57	ENST00000393427.2_(+3)_2
ENST00000395240.3_(+2)_2	57	45068	1	1	1	1	0.09	ENST00000395240.3_(+2)_2
CUFF.12799.2_(+3)_2	57	74747	1	1	1	1	0.05	CUFF.12799.2_(+3)_2
ENST00000358455.4_(+1)	57	18001	2	2	2	2	0.51	ENST00000358455.4_(+1)
ENST00000260379.6_(+1)_2	57	14039	2	2	2	2	0.69	ENST00000260379.6_(+1)_2
ENST00000393183.3_(+1)	57	19175	1	1	1	1	0.21	>ENST00000393183.3_(+1)
CUFF.4802.8_(+2)_2	57	71184	1	1	1	1	0.05	CUFF.4802.8_(+2)_2
CUFF.4593.1_(+2)	57	9906	1	1	1	1	0.44	CUFF.4593.1_(+2)
CUFF.16825.8_(+3)	56	24012	1	1	1	1	0.17	CUFF.16825.8_(+3)
CUFF.13373.3_(+1)_2	56	61557	1	1	1	1	0.06	CUFF.13373.3_(+1)_2
CUFF.7891.1_(+1)_3	56	44501	1	1	1	1	0.09	CUFF.7891.1_(+1)_3
ENST00000273986.4_(+3)	55	18835	2	2	2	2	0.48	ENST00000273986.4_(+3)
ENST00000253047.6_(+2)	55	20183	1	1	1	1	0.2	ENST00000253047.6_(+2)
CUFF.23457.1_(+3)_173	55	1943	3	3	1	1	3.56	CUFF.23457.1_(+3)_173
ENST00000296674.8_(+3)_4	55	21538	1	1	1	1	0.19	>ENST00000296674.8_(+3)_4
ENST00000308025.3_(+3)_2	54	96721	1	1	1	1	0.04	ENST00000308025.3_(+3)_2
ENST00000219169.4_(+2)_4	54	14868	1	1	1	1	0.28	ENST00000219169.4_(+2)_4
ENST00000321751.5_(+1)	53	26607	1	1	1	1	0.15	ENST00000321751.5_(+1)
ENST00000466377.1_(+1)_3	53	9554	1	1	1	1	0.46	ENST00000466377.1_(+1)_3
ENST00000245206.5_(+1)	53	51702	1	1	1	1	0.08	ENST00000245206.5_(+1)
ENST00000371317.5_(+3)_4	52	23435	1	1	1	1	0.17	ENST00000371317.5_(+3)_4
CUFF.4338.2_(+2)	52	26687	1	1	1	1	0.15	CUFF.4338.2_(+2)
CUFF.417.2_(+3)	52	54171	1	1	1	1	0.07	CUFF.417.2_(+3)
ENST00000280756.4_(+2)	51	26211	2	2	2	2	0.33	ENST00000280756.4_(+2)
ENST00000216146.4_(+1)_2	50	47817	1	1	1	1	0.08	ENST00000216146.4_(+1)_2
ENST00000602404.1_(+3)	50	16218	1	1	1	1	0.26	ENST00000602404.1_(+3)
ENST00000225298.7_(+1)	49	64237	1	1	1	1	0.06	ENST00000225298.7_(+1)
CUFF.8950.2_(+3)_2	49	21260	2	2	2	2	0.42	CUFF.8950.2_(+3)_2
ENST00000225969.4_(+3)_2	49	16491	1	1	1	1	0.25	ENST00000225969.4_(+3)_2
ENST00000571957.1_(+3)_2	49	13305	2	2	2	2	0.73	ENST00000571957.1_(+3)_2
CUFF.18751.2_(+2)	49	99442	1	1	1	1	0.04	CUFF.18751.2_(+2)
ENST00000285298.4_(+1)_3	49	17094	2	2	2	2	0.54	ENST00000285298.4_(+1)_3
CUFF.20834.8_(+1)_2	48	12586	1	1	1	1	0.34	CUFF.20834.8_(+1)_2
ENST00000253788.5_(+2)_2	48	16470	1	1	1	1	0.25	ENST00000253788.5_(+2)_2
CUFF.5132.27_(+3)_3	47	43561	1	1	1	1	0.09	CUFF.5132.27_(+3)_3
CUFF.6439.2_(+1)	47	15490	1	1	1	1	0.27	CUFF.6439.2_(+1)
ENST00000382175.3_(+1)	46	25217	1	1	1	1	0.16	ENST00000382175.3_(+1)
ENST00000261813.4_(+1)	46	16091	1	1	1	1	0.26	ENST00000261813.4_(+1)
CUFF.26357.1_(+3)_102	46	6385	1	1	1	1	0.73	>CUFF.26357.1_(+3)_102
ENST00000369307.3_(+2)	46	20865	1	1	1	1	0.2	ENST00000369307.3_(+2)
CUFF.23507.7_(+3)_8	45	32288	1	1	1	1	0.12	CUFF.23507.7_(+3)_8
ENST00000372967.3_(+3)	45	15290	1	1	1	1	0.27	ENST00000372967.3_(+3)
CUFF.3115.2_(+2)	43	37870	1	1	1	1	0.1	>CUFF.3115.2_(+2)
CUFF.17289.5_(+3)_3	43	14004	1	1	1	1	0.3	CUFF.17289.5_(+3)_3
CUFF.13190.3_(+3)_2	43	19747	1	1	1	1	0.21	CUFF.13190.3_(+3)_2
ENST00000264279.5_(+2)_5	42	59909	1	1	1	1	0.07	ENST00000264279.5_(+2)_5
ENST00000368858.5_(+3)_3	42	37342	1	1	1	1	0.11	ENST00000368858.5_(+3)_3
ENST00000308018.4_(+3)_5	42	19153	1	1	1	1	0.21	ENST00000308018.4_(+3)_5
CUFF.11893.6_(+1)	42	23538	1	1	1	1	0.17	>CUFF.11893.6_(+1)
ENST00000433603.1_(+1)	42	9391	1	1	1	1	0.47	ENST00000433603.1_(+1)
CUFF.23081.2_(+2)	41	43642	1	1	1	1	0.09	CUFF.23081.2_(+2)
CUFF.20403.5_(+1)	41	32036	1	1	1	1	0.12	CUFF.20403.5_(+1)
ENST00000265100.2_(+1)	40	18984	1	1	1	1	0.22	ENST00000265100.2_(+1)
ENST00000337554.3_(+1)_2	40	19272	1	1	1	1	0.21	ENST00000337554.3_(+1)_2
ENST00000295767.5_(+2)_4	39	19340	1	1	1	1	0.21	ENST00000295767.5_(+2)_4
ENST00000333762.4_(+1)	39	35098	1	1	1	1	0.11	ENST00000333762.4_(+1)
CUFF.17012.6_(+2)_2	39	70154	1	1	1	1	0.06	>CUFF.17012.6_(+2)_2
CUFF.21492.10_(+1)_2	38	8647	2	2	2	2	1.29	CUFF.21492.10_(+1)_2
CUFF.4285.2_(+3)_2	37	43453	1	1	1	1	0.09	CUFF.4285.2_(+3)_2
CUFF.3491.1_(+1)_2	36	18855	1	1	1	1	0.22	CUFF.3491.1_(+1)_2
CUFF.18889.9_(+2)	35	109069	1	1	1	1	0.04	CUFF.18889.9_(+2)
ENST00000216455.4_(+1)_2	35	30158	1	1	1	1	0.13	ENST00000216455.4_(+1)_2
ENST00000271373.4_(+1)	35	19677	1	1	1	1	0.21	ENST00000271373.4_(+1)
CUFF.20646.1_(+3)_2	34	2870	1	1	1	1	2.07	CUFF.20646.1_(+3)_2
ENST00000398606.3_(+1)	34	32321	1	1	1	1	0.12	ENST00000398606.3_(+1)
ENST00000396210.3_(+1)	34	20669	1	1	1	1	0.2	ENST00000396210.3_(+1)
ENST00000361564.4_(+1)	34	19222	1	1	1	1	0.21	ENST00000361564.4_(+1)
ENST00000306024.3_(+3)_5	34	11952	1	1	1	1	0.36	ENST00000306024.3_(+3)_5
CUFF.1465.1_(+2)_13	34	7061	1	1	1	1	0.65	CUFF.1465.1_(+2)_13
ENST00000341165.6_(+1)_19	33	6640	1	1	1	1	0.7	ENST00000341165.6_(+1)_19
ENST00000296471.7_(+1)_18	33	4470	1	1	1	1	1.16	ENST00000296471.7_(+1)_18
CUFF.23420.1_(+2)_61	33	4049	1	1	1	1	1.33	CUFF.23420.1_(+2)_61
CUFF.16311.2_(+2)_3	33	70509	1	1	1	1	0.06	>CUFF.16311.2_(+2)_3
CUFF.20342.1_(+1)_49	31	2612	1	1	1	1	2.32	CUFF.20342.1_(+1)_49
ENST00000392246.2_(+2)_3	31	15965	1	1	1	1	0.26	ENST00000392246.2_(+2)_3
CUFF.20097.1_(+2)_4	29	131671	1	1	1	1	0.03	CUFF.20097.1_(+2)_4
ENST00000264595.2_(+3)_2	29	39602	1	1	1	1	0.1	ENST00000264595.2_(+3)_2
ENST00000374680.3_(+3)_3	29	61199	1	1	1	1	0.06	ENST00000374680.3_(+3)_3
ENST00000568032.1_(+3)	28	8637	1	1	1	1	0.51	ENST00000568032.1_(+3)
CUFF.1277.1_(+3)_2	28	21756	1	1	1	1	0.19	>CUFF.1277.1_(+3)_2
P07477	25	26541	1	1	1	1	0.15	SWISS-PROT:P07477 Tax_Id=9606 Gene_Symbol=PRSS1 Trypsin-1 precursor
ENST00000368809.1_(+3)	23	13971	1	1	1	1	0.3	ENST00000368809.1_(+3)
CUFF.22483.3_(+1)_3	23	26630	1	1	1	1	0.15	>CUFF.22483.3_(+1)_3
ENST00000393432.4_(+1)_4	23	49428	1	1	1	1	0.08	ENST00000393432.4_(+1)_4
