# Supplementary material for: Nascent alt-protein chemoproteomics reveals a repressor of ribosome biogenesis
Source: Research Square preprint supplement (doi:10.21203/rs.3.rs-871945/v1), 2021-09-09
Supplement: Supplementary file 5 [file de6bb223c7cc5d52dedb0c2a.xlsx]

## Sheet: Key
Abbreviations used for protein and peptide identification summary tables
Peptide Identifications
Database Accession	UniProt + MINAS-60 protein; contaminants
Peptide m/z	Observed mass over charge
Peptide Mass	Observed relative molecular mass
Peptide Score	Peptide match score
Sequence	Sequence of the peptide in 1-letter code
Modifications	Any variable modifications found in the peptide
Protein Identifications
LFQ intensity	Label-free quantification intensity
Protein IDs	The name of protein identified
Worksheets
S1	Key
S2	Interacted partner protein level evidence

## Sheet: Interacted partner of MINAS-60
Protein IDs	Majority protein IDs	KI/Ctrl-1	KI/Ctrl-2	KI/Ctrl-3	LFQ intensity Ctrl-1	LFQ intensity Ctrl-2	LFQ intensity Ctrl-3	LFQ intensity KI-1	LFQ intensity KI-2	LFQ intensity KI-3	Peptide counts (all)	Peptide counts (razor+unique)	Peptide counts (unique)	Fasta headers	Number of proteins	Peptides	Razor + unique peptides	Unique peptides	Peptides 293T-1	Peptides 293T-2	Peptides 293T-3	Peptides KI-1	Peptides KI-2	Peptides KI-3	Razor + unique peptides 293T-1	Razor + unique peptides 293T-2	Razor + unique peptides 293T-3	Razor + unique peptides KI-1	Razor + unique peptides KI-2	Razor + unique peptides KI-3	Unique peptides 293T-1	Unique peptides 293T-2	Unique peptides 293T-3	Unique peptides KI-1	Unique peptides KI-2	Unique peptides KI-3	Sequence coverage [%]	Unique + razor sequence coverage [%]	Unique sequence coverage [%]	Mol. weight [kDa]	Sequence length	Sequence lengths	Q-value	Score	Sequence coverage 293T-1 [%]	Sequence coverage 293T-2 [%]	Sequence coverage 293T-3 [%]	Sequence coverage KI-1 [%]	Sequence coverage KI-2 [%]
sp|P36578|RL4_HUMAN;tr|H3BM89|H3BM89_HUMAN;tr|H3BTP7|H3BTP7_HUMAN;tr|H3BU31|H3BU31_HUMAN	sp|P36578|RL4_HUMAN;tr|H3BM89|H3BM89_HUMAN;tr|H3BTP7|H3BTP7_HUMAN	498030000	2727200000	4205500000	1	1	1	498030000	2727200000	4205500000	24;17;12;9	24;17;12;9	24;17;12;9	sp|P36578|RL4_HUMAN 60S ribosomal protein L4 OS=Homo sapiens GN=RPL4 PE=1 SV=5;tr|H3BM89|H3BM89_HUMAN 60S ribosomal protein L4 OS=Homo sapiens GN=RPL4 PE=1 SV=1;tr|H3BTP7|H3BTP7_HUMAN 60S ribosomal protein L4 (Fragment) OS=Homo sapiens GN=RPL4 PE=1 SV=1	4	24	24	24	0	1	0	12	23	15	0	1	0	12	23	15	0	1	0	12	23	15	39.3	39.3	39.3	47.697	427	427;333;170;171	0	246.36	0	5.2	0	26.5	39.1
sp|P62424|RL7A_HUMAN;tr|Q5T8U3|Q5T8U3_HUMAN;tr|Q5T8U2|Q5T8U2_HUMAN	sp|P62424|RL7A_HUMAN;tr|Q5T8U3|Q5T8U3_HUMAN	572020000	2039100000	1984000000	1	1	1	572020000	2039100000	1984000000	15;11;6	15;11;6	15;11;6	sp|P62424|RL7A_HUMAN 60S ribosomal protein L7a OS=Homo sapiens GN=RPL7A PE=1 SV=2;tr|Q5T8U3|Q5T8U3_HUMAN 60S ribosomal protein L7a (Fragment) OS=Homo sapiens GN=RPL7A PE=1 SV=1	3	15	15	15	0	0	0	11	12	11	0	0	0	11	12	11	0	0	0	11	12	11	34.2	34.2	34.2	29.995	266	266;191;151	0	177.75	0	0	0	33.1	31.2
sp|P62906|RL10A_HUMAN	sp|P62906|RL10A_HUMAN	113060000	1478000000	1852400000	1	1	1	113060000	1478000000	1852400000	10	10	10	sp|P62906|RL10A_HUMAN 60S ribosomal protein L10a OS=Homo sapiens GN=RPL10A PE=1 SV=2	1	10	10	10	1	1	0	7	10	9	1	1	0	7	10	9	1	1	0	7	10	9	34.6	34.6	34.6	24.831	217	217	0	127.68	3.7	6	0	26.3	34.6
sp|P05386|RLA1_HUMAN	sp|P05386|RLA1_HUMAN	1	1551800000	1404700000	1	1	1	1	1551800000	1404700000	4	2	2	sp|P05386|RLA1_HUMAN 60S acidic ribosomal protein P1 OS=Homo sapiens GN=RPLP1 PE=1 SV=1	1	4	2	2	0	1	1	2	4	3	0	1	1	1	2	2	0	1	1	1	2	2	66.7	51.8	51.8	11.514	114	114	0	59.699	0	14	14	28.9	66.7
sp|P61353|RL27_HUMAN;tr|K7ELC7|K7ELC7_HUMAN;tr|K7EQQ9|K7EQQ9_HUMAN;tr|K7ERY7|K7ERY7_HUMAN	sp|P61353|RL27_HUMAN;tr|K7ELC7|K7ELC7_HUMAN;tr|K7EQQ9|K7EQQ9_HUMAN	17.8803	1046600000	1269900000	3623700	1	1	64793000	1046600000	1269900000	11;10;6;1	11;10;6;1	11;10;6;1	sp|P61353|RL27_HUMAN 60S ribosomal protein L27 OS=Homo sapiens GN=RPL27 PE=1 SV=2;tr|K7ELC7|K7ELC7_HUMAN 60S ribosomal protein L27 (Fragment) OS=Homo sapiens GN=RPL27 PE=1 SV=1;tr|K7EQQ9|K7EQQ9_HUMAN 60S ribosomal protein L27 OS=Homo sapiens GN=RPL27 PE=1	4	11	11	11	2	0	1	7	10	9	2	0	1	7	10	9	2	0	1	7	10	9	55.1	55.1	55.1	15.798	136	136;144;80;40	0	99.206	22.1	0	6.6	49.3	49.3
sp|P18124|RL7_HUMAN;tr|A8MUD9|A8MUD9_HUMAN;tr|C9JIJ5|C9JIJ5_HUMAN;tr|C9JZ88|C9JZ88_HUMAN	sp|P18124|RL7_HUMAN;tr|A8MUD9|A8MUD9_HUMAN	192200000	719820000	1006400000	1	1	1	192200000	719820000	1006400000	20;16;6;5	20;16;6;5	20;16;6;5	sp|P18124|RL7_HUMAN 60S ribosomal protein L7 OS=Homo sapiens GN=RPL7 PE=1 SV=1;tr|A8MUD9|A8MUD9_HUMAN 60S ribosomal protein L7 OS=Homo sapiens GN=RPL7 PE=1 SV=1	4	20	20	20	1	0	0	12	18	13	1	0	0	12	18	13	1	0	0	12	18	13	52	52	52	29.225	248	248;208;99;88	0	191.33	4.4	0	0	38.7	48.4
sp|P46778|RL21_HUMAN;tr|G3V1B3|G3V1B3_HUMAN;tr|M0R181|M0R181_HUMAN;tr|M0R3I5|M0R3I5_HUMAN	sp|P46778|RL21_HUMAN;tr|G3V1B3|G3V1B3_HUMAN;tr|M0R181|M0R181_HUMAN	56194000	946760000	922860000	1	1	1	56194000	946760000	922860000	11;6;6;1	11;6;6;1	11;6;6;1	sp|P46778|RL21_HUMAN 60S ribosomal protein L21 OS=Homo sapiens GN=RPL21 PE=1 SV=2;tr|G3V1B3|G3V1B3_HUMAN 60S ribosomal protein L21 OS=Homo sapiens GN=RPL21 PE=1 SV=1;tr|M0R181|M0R181_HUMAN 60S ribosomal protein L21 (Fragment) OS=Homo sapiens GN=RPL21 PE=1	4	11	11	11	1	1	1	5	10	9	1	1	1	5	10	9	1	1	1	5	10	9	48.8	48.8	48.8	18.565	160	160;87;122;59	0	159.4	9.4	9.4	9.4	32.5	48.8
sp|P39023|RL3_HUMAN;tr|G5E9G0|G5E9G0_HUMAN;tr|H7C422|H7C422_HUMAN;tr|H7C3M2|H7C3M2_HUMAN;tr|B5MCW2|B5MCW2_HUMAN;tr|F8WCR1|F8WCR1_HUMAN;sp|Q92901|RL3L_HUMAN	sp|P39023|RL3_HUMAN;tr|G5E9G0|G5E9G0_HUMAN;tr|H7C422|H7C422_HUMAN	257670000	714300000	785410000	1	1	1	257670000	714300000	785410000	21;17;11;10;9;5;2	21;17;11;10;9;5;2	21;17;11;10;9;5;2	sp|P39023|RL3_HUMAN 60S ribosomal protein L3 OS=Homo sapiens GN=RPL3 PE=1 SV=2;tr|G5E9G0|G5E9G0_HUMAN 60S ribosomal protein L3 OS=Homo sapiens GN=RPL3 PE=1 SV=1;tr|H7C422|H7C422_HUMAN 60S ribosomal protein L3 (Fragment) OS=Homo sapiens GN=RPL3 PE=1 SV=1	7	21	21	21	0	0	0	9	19	19	0	0	0	9	19	19	0	0	0	9	19	19	45.7	45.7	45.7	46.108	403	403;351;305;261;272;180;407	0	208.65	0	0	0	22.8	39.7
tr|Q5JR95|Q5JR95_HUMAN;sp|P62241|RS8_HUMAN	tr|Q5JR95|Q5JR95_HUMAN;sp|P62241|RS8_HUMAN	130520000	977370000	778460000	1	1	1	130520000	977370000	778460000	11;11	11;11	11;11	tr|Q5JR95|Q5JR95_HUMAN 40S ribosomal protein S8 OS=Homo sapiens GN=RPS8 PE=1 SV=1;sp|P62241|RS8_HUMAN 40S ribosomal protein S8 OS=Homo sapiens GN=RPS8 PE=1 SV=2	2	11	11	11	0	0	0	6	9	8	0	0	0	6	9	8	0	0	0	6	9	8	43.6	43.6	43.6	21.879	188	188;208	0	190.13	0	0	0	28.7	43.6
sp|Q07020|RL18_HUMAN;tr|J3QQ67|J3QQ67_HUMAN;tr|F8VYV2|F8VYV2_HUMAN;tr|G3V203|G3V203_HUMAN;tr|H0YHA7|H0YHA7_HUMAN;tr|A0A075B7A0|A0A075B7A0_HUMAN;tr|F8VUA6|F8VUA6_HUMAN;tr|F8VXR6|F8VXR6_HUMAN	sp|Q07020|RL18_HUMAN;tr|J3QQ67|J3QQ67_HUMAN;tr|F8VYV2|F8VYV2_HUMAN;tr|G3V203|G3V203_HUMAN;tr|H0YHA7|H0YHA7_HUMAN;tr|A0A075B7A0|A0A075B7A0_HUMAN	156670000	923240000	770720000	1	1	1	156670000	923240000	770720000	9;9;8;8;8;7;4;1	9;9;8;8;8;7;4;1	9;9;8;8;8;7;4;1	sp|Q07020|RL18_HUMAN 60S ribosomal protein L18 OS=Homo sapiens GN=RPL18 PE=1 SV=2;tr|J3QQ67|J3QQ67_HUMAN 60S ribosomal protein L18 (Fragment) OS=Homo sapiens GN=RPL18 PE=1 SV=1;tr|F8VYV2|F8VYV2_HUMAN 60S ribosomal protein L18 OS=Homo sapiens GN=RPL18 PE=1	8	9	9	9	0	1	2	6	5	5	0	1	2	6	5	5	0	1	2	6	5	5	37.2	37.2	37.2	21.634	188	188;190;133;164;167;138;130;475	0	87.261	0	6.9	13.8	29.3	27.7
sp|Q02878|RL6_HUMAN;tr|F8VZ45|F8VZ45_HUMAN;tr|U3KQR5|U3KQR5_HUMAN;tr|F8VR69|F8VR69_HUMAN;tr|F8VZA3|F8VZA3_HUMAN;tr|F8VWR1|F8VWR1_HUMAN;tr|F8VU16|F8VU16_HUMAN	sp|Q02878|RL6_HUMAN	41.4907	3176100000	744100000	15630000	1	1	648500000	3176100000	744100000	17;6;6;4;2;2;2	17;6;6;4;2;2;2	17;6;6;4;2;2;2	sp|Q02878|RL6_HUMAN 60S ribosomal protein L6 OS=Homo sapiens GN=RPL6 PE=1 SV=3	7	17	17	17	2	1	0	13	16	14	2	1	0	13	16	14	2	1	0	13	16	14	44.1	44.1	44.1	32.728	288	288;159;160;64;105;118;120	0	323.31	6.2	3.5	0	42	44.1
sp|P62913|RL11_HUMAN;tr|Q5VVC8|Q5VVC8_HUMAN;tr|Q5VVC9|Q5VVC9_HUMAN	sp|P62913|RL11_HUMAN;tr|Q5VVC8|Q5VVC8_HUMAN	188410000	917050000	729310000	1	1	1	188410000	917050000	729310000	9;7;4	9;7;4	9;7;4	sp|P62913|RL11_HUMAN 60S ribosomal protein L11 OS=Homo sapiens GN=RPL11 PE=1 SV=2;tr|Q5VVC8|Q5VVC8_HUMAN 60S ribosomal protein L11 (Fragment) OS=Homo sapiens GN=RPL11 PE=1 SV=1	3	9	9	9	1	1	1	5	9	7	1	1	1	5	9	7	1	1	1	5	9	7	37.6	37.6	37.6	20.252	178	178;174;131	0	82.159	7.9	7.9	7.9	28.1	37.6
sp|P05388|RLA0_HUMAN;tr|F8VWS0|F8VWS0_HUMAN;tr|F8VW21|F8VW21_HUMAN;tr|F8VU65|F8VU65_HUMAN;tr|F8VPE8|F8VPE8_HUMAN;tr|G3V210|G3V210_HUMAN;tr|F8VQY6|F8VQY6_HUMAN;tr|F8VRK7|F8VRK7_HUMAN;sp|Q8NHW5|RLA0L_HUMAN;tr|F8VZS0|F8VZS0_HUMAN;tr|F8VWV4|F8VWV4_HUMAN;tr|F8VS58|F8VS58_HUMAN;tr|F8W1K8|F8W1K8_HUMAN	sp|P05388|RLA0_HUMAN;tr|F8VWS0|F8VWS0_HUMAN;tr|F8VW21|F8VW21_HUMAN;tr|F8VU65|F8VU65_HUMAN;tr|F8VPE8|F8VPE8_HUMAN;tr|G3V210|G3V210_HUMAN;tr|F8VQY6|F8VQY6_HUMAN;tr|F8VRK7|F8VRK7_HUMAN;sp|Q8NHW5|RLA0L_HUMAN;tr|F8VZS0|F8VZS0_HUMAN;tr|F8VWV4|F8VWV4_HUMAN;tr|F8VS58|F8VS58_HUMAN	68.8293	221.089	627030000	8173700	20380000	1	562590000	4505800000	627030000	14;13;11;11;10;10;9;9;9;8;7;7;3	14;13;11;11;10;10;9;9;9;8;7;7;3	14;13;11;11;10;10;9;9;9;8;7;7;3	sp|P05388|RLA0_HUMAN 60S acidic ribosomal protein P0 OS=Homo sapiens GN=RPLP0 PE=1 SV=1;tr|F8VWS0|F8VWS0_HUMAN 60S acidic ribosomal protein P0 OS=Homo sapiens GN=RPLP0 PE=1 SV=1;tr|F8VW21|F8VW21_HUMAN 60S acidic ribosomal protein P0 (Fragment) OS=Homo sapi	13	14	14	14	2	2	1	8	14	13	2	2	1	8	14	13	2	2	1	8	14	13	53	53	53	34.273	317	317;281;244;443;153;166;142;156;317;488;111;121;107	0	268.35	12.6	12.9	9.8	28.1	53
sp|Q99880|H2B1L_HUMAN;sp|Q99879|H2B1M_HUMAN;sp|Q99877|H2B1N_HUMAN;sp|Q93079|H2B1H_HUMAN;sp|Q5QNW6|H2B2F_HUMAN;sp|P62807|H2B1C_HUMAN;sp|P58876|H2B1D_HUMAN;sp|O60814|H2B1K_HUMAN;tr|U3KQK0|U3KQK0_HUMAN;sp|P57053|H2BFS_HUMAN;sp|Q96A08|H2B1A_HUMAN	sp|Q99880|H2B1L_HUMAN;sp|Q99879|H2B1M_HUMAN;sp|Q99877|H2B1N_HUMAN;sp|Q93079|H2B1H_HUMAN;sp|Q5QNW6|H2B2F_HUMAN;sp|P62807|H2B1C_HUMAN;sp|P58876|H2B1D_HUMAN;sp|O60814|H2B1K_HUMAN;tr|U3KQK0|U3KQK0_HUMAN;sp|P57053|H2BFS_HUMAN;sp|Q96A08|H2B1A_HUMAN	1.37827	436750000	561340000	34933000	1	1	48147000	436750000	561340000	8;8;8;8;8;8;8;8;8;7;4	8;8;8;8;8;8;8;8;8;7;4	2;2;2;2;2;2;2;2;2;2;0	sp|Q99880|H2B1L_HUMAN Histone H2B type 1-L OS=Homo sapiens GN=HIST1H2BL PE=1 SV=3;sp|Q99879|H2B1M_HUMAN Histone H2B type 1-M OS=Homo sapiens GN=HIST1H2BM PE=1 SV=3;sp|Q99877|H2B1N_HUMAN Histone H2B type 1-N OS=Homo sapiens GN=HIST1H2BN PE=1 SV=3;sp|Q93079|	11	8	8	2	4	0	0	3	8	6	4	0	0	3	8	6	1	0	0	1	2	1	53.2	53.2	7.9	13.952	126	126;126;126;126;126;126;126;126;508;126;127	0	120.45	28.6	0	0	24.6	53.2
sp|P46781|RS9_HUMAN;tr|B5MCT8|B5MCT8_HUMAN;tr|C9JM19|C9JM19_HUMAN;tr|F2Z3C0|F2Z3C0_HUMAN;tr|A8MXK4|A8MXK4_HUMAN	sp|P46781|RS9_HUMAN;tr|B5MCT8|B5MCT8_HUMAN;tr|C9JM19|C9JM19_HUMAN	62135000	427780000	542370000	1	1	1	62135000	427780000	542370000	17;14;14;4;4	17;14;14;4;4	17;14;14;4;4	sp|P46781|RS9_HUMAN 40S ribosomal protein S9 OS=Homo sapiens GN=RPS9 PE=1 SV=3;tr|B5MCT8|B5MCT8_HUMAN 40S ribosomal protein S9 OS=Homo sapiens GN=RPS9 PE=1 SV=1;tr|C9JM19|C9JM19_HUMAN 40S ribosomal protein S9 OS=Homo sapiens GN=RPS9 PE=1 SV=1	5	17	17	17	0	1	0	11	14	11	0	1	0	11	14	11	0	1	0	11	14	11	12.3	12.3	12.3	83.41	756	756;139;156;77;79	0	147.77	0	1.5	0	11	9.9
sp|P62249|RS16_HUMAN;tr|M0R210|M0R210_HUMAN;tr|A0A087WZ27|A0A087WZ27_HUMAN;tr|M0R3H0|M0R3H0_HUMAN;tr|M0R1M5|M0R1M5_HUMAN;tr|M0QX76|M0QX76_HUMAN;tr|Q6IPX4|Q6IPX4_HUMAN	sp|P62249|RS16_HUMAN;tr|M0R210|M0R210_HUMAN;tr|A0A087WZ27|A0A087WZ27_HUMAN;tr|M0R3H0|M0R3H0_HUMAN;tr|M0R1M5|M0R1M5_HUMAN	7.82727	402540000	499250000	8111900	1	1	63494000	402540000	499250000	12;11;9;8;6;5;5	12;11;9;8;6;5;5	12;11;9;8;6;5;5	sp|P62249|RS16_HUMAN 40S ribosomal protein S16 OS=Homo sapiens GN=RPS16 PE=1 SV=2;tr|M0R210|M0R210_HUMAN 40S ribosomal protein S16 OS=Homo sapiens GN=RPS16 PE=1 SV=1;tr|A0A087WZ27|A0A087WZ27_HUMAN Zinc finger protein 90 OS=Homo sapiens GN=ZNF90 PE=4 SV=2;t	7	12	12	12	3	0	0	8	11	9	3	0	0	8	11	9	3	0	0	8	11	9	62.3	62.3	62.3	16.445	146	146;129;129;100;85;50;152	0	85.162	22.6	0	0	54.1	56.8
sp|P61313|RL15_HUMAN;tr|E7EQV9|E7EQV9_HUMAN;tr|E7ENU7|E7ENU7_HUMAN;tr|E7EX53|E7EX53_HUMAN;tr|E7ERA2|E7ERA2_HUMAN	sp|P61313|RL15_HUMAN;tr|E7EQV9|E7EQV9_HUMAN;tr|E7ENU7|E7ENU7_HUMAN;tr|E7EX53|E7EX53_HUMAN	68559000	461870000	449760000	1	1	1	68559000	461870000	449760000	12;9;8;6;2	12;9;8;6;2	12;9;8;6;2	sp|P61313|RL15_HUMAN 60S ribosomal protein L15 OS=Homo sapiens GN=RPL15 PE=1 SV=2;tr|E7EQV9|E7EQV9_HUMAN Ribosomal protein L15 (Fragment) OS=Homo sapiens GN=RPL15 PE=1 SV=1;tr|E7ENU7|E7ENU7_HUMAN Ribosomal protein L15 (Fragment) OS=Homo sapiens GN=RPL15 PE	5	12	12	12	1	0	0	7	11	9	1	0	0	7	11	9	1	0	0	7	11	9	50.5	50.5	50.5	24.146	204	204;174;175;414;59	0	97.514	4.4	0	0	32.4	47.1
sp|P26373|RL13_HUMAN;tr|J3QSB4|J3QSB4_HUMAN;tr|J3KS98|J3KS98_HUMAN;tr|H3BUK8|H3BUK8_HUMAN;tr|H3BTH3|H3BTH3_HUMAN	sp|P26373|RL13_HUMAN;tr|J3QSB4|J3QSB4_HUMAN	11.3951	1140800000	433270000	8833600	1	1	100660000	1140800000	433270000	13;7;3;2;2	13;7;3;2;2	13;7;3;2;2	sp|P26373|RL13_HUMAN 60S ribosomal protein L13 OS=Homo sapiens GN=RPL13 PE=1 SV=4;tr|J3QSB4|J3QSB4_HUMAN 60S ribosomal protein L13 (Fragment) OS=Homo sapiens GN=RPL13 PE=1 SV=1	5	13	13	13	2	0	1	4	13	8	2	0	1	4	13	8	2	0	1	4	13	8	50.7	50.7	50.7	24.261	211	211;126;78;54;63	0	172.52	9	0	6.2	20.4	50.7
sp|Q9Y3U8|RL36_HUMAN;tr|J3QSB5|J3QSB5_HUMAN;tr|J3KTD3|J3KTD3_HUMAN	sp|Q9Y3U8|RL36_HUMAN;tr|J3QSB5|J3QSB5_HUMAN	17070000	414270000	404580000	1	1	1	17070000	414270000	404580000	6;3;1	6;3;1	6;3;1	sp|Q9Y3U8|RL36_HUMAN 60S ribosomal protein L36 OS=Homo sapiens GN=RPL36 PE=1 SV=3;tr|J3QSB5|J3QSB5_HUMAN 60S ribosomal protein L36 OS=Homo sapiens GN=RPL36 PE=1 SV=1	3	6	6	6	0	0	0	4	6	4	0	0	0	4	6	4	0	0	0	4	6	4	37.1	37.1	37.1	12.254	105	105;94;68	0	49.985	0	0	0	21	37.1
sp|Q99848|EBP2_HUMAN;tr|Q6ZWE5|Q6ZWE5_HUMAN	sp|Q99848|EBP2_HUMAN;tr|Q6ZWE5|Q6ZWE5_HUMAN	1	296690000	387550000	1	1	1	1	296690000	387550000	13;13	13;13	13;13	sp|Q99848|EBP2_HUMAN Probable rRNA-processing protein EBP2 OS=Homo sapiens GN=EBNA1BP2 PE=1 SV=2;tr|Q6ZWE5|Q6ZWE5_HUMAN Monocarboxylate transporter 14 (Fragment) OS=Homo sapiens GN=SLC16A14 PE=2 SV=1	2	13	13	13	0	0	0	1	12	10	0	0	0	1	12	10	0	0	0	1	12	10	18.9	18.9	18.9	69.317	635	635;937	0	101.68	0	0	0	1.6	18.1
sp|P39019|RS19_HUMAN;tr|M0R2L9|M0R2L9_HUMAN;tr|M0QXK4|M0QXK4_HUMAN;tr|M0QYF7|M0QYF7_HUMAN;tr|M0R140|M0R140_HUMAN;tr|A0A075B6E2|A0A075B6E2_HUMAN	sp|P39019|RS19_HUMAN;tr|M0R2L9|M0R2L9_HUMAN;tr|M0QXK4|M0QXK4_HUMAN;tr|M0QYF7|M0QYF7_HUMAN;tr|M0R140|M0R140_HUMAN	94182000	325490000	341780000	1	1	1	94182000	325490000	341780000	10;6;6;6;6;4	10;6;6;6;6;4	10;6;6;6;6;4	sp|P39019|RS19_HUMAN 40S ribosomal protein S19 OS=Homo sapiens GN=RPS19 PE=1 SV=2;tr|M0R2L9|M0R2L9_HUMAN 40S ribosomal protein S19 (Fragment) OS=Homo sapiens GN=RPS19 PE=1 SV=1;tr|M0QXK4|M0QXK4_HUMAN 40S ribosomal protein S19 (Fragment) OS=Homo sapiens GN=	6	10	10	10	1	0	1	5	8	9	1	0	1	5	8	9	1	0	1	5	8	9	49	49	49	16.06	145	145;71;76;100;102;71	0	71.671	6.2	0	6.2	24.8	43.4
sp|P40429|RL13A_HUMAN;tr|M0QYS1|M0QYS1_HUMAN;tr|Q8J015|Q8J015_HUMAN;sp|Q6NVV1|R13P3_HUMAN;tr|M0QZU1|M0QZU1_HUMAN;tr|A0A096LPE0|A0A096LPE0_HUMAN	sp|P40429|RL13A_HUMAN;tr|M0QYS1|M0QYS1_HUMAN;tr|Q8J015|Q8J015_HUMAN	104510000	191190000	339890000	1	1	1	104510000	191190000	339890000	13;12;10;5;2;2	13;12;10;5;2;2	13;12;10;5;2;2	sp|P40429|RL13A_HUMAN 60S ribosomal protein L13a OS=Homo sapiens GN=RPL13A PE=1 SV=2;tr|M0QYS1|M0QYS1_HUMAN 60S ribosomal protein L13a (Fragment) OS=Homo sapiens GN=RPL13A PE=1 SV=2;tr|Q8J015|Q8J015_HUMAN 60S ribosomal protein L13a OS=Homo sapiens GN=RPL13	6	13	13	13	0	0	0	8	9	9	0	0	0	8	9	9	0	0	0	8	9	9	43.8	43.8	43.8	23.577	203	203;210;142;102;46;459	0	86.958	0	0	0	36	32.5
sp|P62851|RS25_HUMAN	sp|P62851|RS25_HUMAN	17337000	160720000	330480000	1	1	1	17337000	160720000	330480000	6	6	6	sp|P62851|RS25_HUMAN 40S ribosomal protein S25 OS=Homo sapiens GN=RPS25 PE=1 SV=1	1	6	6	6	0	0	0	3	5	5	0	0	0	3	5	5	0	0	0	3	5	5	31.2	31.2	31.2	13.742	125	125	0	43.571	0	0	0	22.4	29.6
tr|J3QR09|J3QR09_HUMAN;sp|P84098|RL19_HUMAN;tr|J3KTE4|J3KTE4_HUMAN;tr|J3QL15|J3QL15_HUMAN	tr|J3QR09|J3QR09_HUMAN;sp|P84098|RL19_HUMAN;tr|J3KTE4|J3KTE4_HUMAN;tr|J3QL15|J3QL15_HUMAN	89170000	300460000	285910000	1	1	1	89170000	300460000	285910000	8;8;7;4	8;8;7;4	8;8;7;4	tr|J3QR09|J3QR09_HUMAN Ribosomal protein L19 OS=Homo sapiens GN=RPL19 PE=1 SV=1;sp|P84098|RL19_HUMAN 60S ribosomal protein L19 OS=Homo sapiens GN=RPL19 PE=1 SV=1;tr|J3KTE4|J3KTE4_HUMAN Ribosomal protein L19 OS=Homo sapiens GN=RPL19 PE=1 SV=1;tr|J3QL15|J3QL	4	8	8	8	0	0	0	4	7	7	0	0	0	4	7	7	0	0	0	4	7	7	35.8	35.8	35.8	23.134	193	193;196;611;128	0	75.438	0	0	0	22.8	31.1
sp|Q9BZE4|NOG1_HUMAN;tr|Q5T3R7|Q5T3R7_HUMAN	sp|Q9BZE4|NOG1_HUMAN	7105800	270230000	282800000	1	1	1	7105800	270230000	282800000	24;8	24;8	24;8	sp|Q9BZE4|NOG1_HUMAN Nucleolar GTP-binding protein 1 OS=Homo sapiens GN=GTPBP4 PE=1 SV=3	2	24	24	24	0	0	0	3	20	21	0	0	0	3	20	21	0	0	0	3	20	21	36.9	36.9	36.9	73.964	634	634;140	0	186.38	0	0	0	5.2	30
sp|P23396|RS3_HUMAN;tr|F2Z2S8|F2Z2S8_HUMAN;tr|H0YCJ7|H0YCJ7_HUMAN;tr|E9PQ96|E9PQ96_HUMAN;tr|E9PJH4|E9PJH4_HUMAN;tr|E9PK82|E9PK82_HUMAN;tr|H0YF32|H0YF32_HUMAN;tr|C9JNE2|C9JNE2_HUMAN;tr|E9PSF4|E9PSF4_HUMAN;tr|E9PQX2|E9PQX2_HUMAN;tr|H0YES8|H0YES8_HUMAN	sp|P23396|RS3_HUMAN	17.1909	305590000	281790000	6574400	1	1	113020000	305590000	281790000	28;10;10;8;8;8;8;6;5;3;1	28;10;10;8;8;8;8;6;5;3;1	10;0;0;0;0;0;0;4;0;0;0	sp|P23396|RS3_HUMAN 40S ribosomal protein S3 OS=Homo sapiens GN=RPS3 PE=1 SV=2	11	28	28	10	3	0	0	12	24	22	3	0	0	12	24	22	0	0	0	4	8	8	30.4	30.4	14.1	137.8	1287	1287;117;293;91;115;128;307;490;334;44;33	0	223.39	2.3	0	0	12.4	26.2
tr|E7EPB3|E7EPB3_HUMAN;sp|P50914|RL14_HUMAN	tr|E7EPB3|E7EPB3_HUMAN;sp|P50914|RL14_HUMAN	47361000	310410000	247060000	1	1	1	47361000	310410000	247060000	5;5	5;5	5;5	tr|E7EPB3|E7EPB3_HUMAN 60S ribosomal protein L14 OS=Homo sapiens GN=RPL14 PE=1 SV=1;sp|P50914|RL14_HUMAN 60S ribosomal protein L14 OS=Homo sapiens GN=RPL14 PE=1 SV=4	2	5	5	5	0	0	1	2	4	5	0	0	1	2	4	5	0	0	1	2	4	5	37.9	37.9	37.9	14.558	124	124;215	0	35.308	0	0	9.7	19.4	32.3
tr|E9PLL6|E9PLL6_HUMAN;sp|P46776|RL27A_HUMAN;tr|E9PJD9|E9PJD9_HUMAN;tr|E9PLX7|E9PLX7_HUMAN	tr|E9PLL6|E9PLL6_HUMAN;sp|P46776|RL27A_HUMAN;tr|E9PJD9|E9PJD9_HUMAN	18441000	118350000	237630000	1	1	1	18441000	118350000	237630000	5;5;3;1	5;5;3;1	5;5;3;1	tr|E9PLL6|E9PLL6_HUMAN 60S ribosomal protein L27a OS=Homo sapiens GN=RPL27A PE=1 SV=1;sp|P46776|RL27A_HUMAN 60S ribosomal protein L27a OS=Homo sapiens GN=RPL27A PE=1 SV=2;tr|E9PJD9|E9PJD9_HUMAN 60S ribosomal protein L27a OS=Homo sapiens GN=RPL27A PE=1 SV=1	4	5	5	5	0	0	0	4	4	4	0	0	0	4	4	4	0	0	0	4	4	4	42.6	42.6	42.6	12.201	108	108;148;1170;113	0	32.425	0	0	0	31.5	31.5
sp|P62917|RL8_HUMAN;tr|E9PKZ0|E9PKZ0_HUMAN;tr|E9PKU4|E9PKU4_HUMAN;tr|G3V1A1|G3V1A1_HUMAN;tr|E9PP36|E9PP36_HUMAN	sp|P62917|RL8_HUMAN;tr|E9PKZ0|E9PKZ0_HUMAN;tr|E9PKU4|E9PKU4_HUMAN;tr|G3V1A1|G3V1A1_HUMAN;tr|E9PP36|E9PP36_HUMAN	170140000	262960000	233590000	1	1	1	170140000	262960000	233590000	11;9;9;8;6	11;9;9;8;6	11;9;9;8;6	sp|P62917|RL8_HUMAN 60S ribosomal protein L8 OS=Homo sapiens GN=RPL8 PE=1 SV=2;tr|E9PKZ0|E9PKZ0_HUMAN 60S ribosomal protein L8 (Fragment) OS=Homo sapiens GN=RPL8 PE=1 SV=1;tr|E9PKU4|E9PKU4_HUMAN 60S ribosomal protein L8 (Fragment) OS=Homo sapiens GN=RPL8 P	5	11	11	11	1	0	0	6	9	9	1	0	0	6	9	9	1	0	0	6	9	9	35.4	35.4	35.4	28.024	257	257;205;235;167;148	0	84.641	4.3	0	0	19.8	25.7
sp|P62269|RS18_HUMAN;tr|A0A0G2JQH2|A0A0G2JQH2_HUMAN;tr|Q5GGW2|Q5GGW2_HUMAN;tr|J3JS69|J3JS69_HUMAN	sp|P62269|RS18_HUMAN	19773000	259400000	225160000	1	1	1	19773000	259400000	225160000	17;5;5;4	17;5;5;4	17;5;5;4	sp|P62269|RS18_HUMAN 40S ribosomal protein S18 OS=Homo sapiens GN=RPS18 PE=1 SV=3	4	17	17	17	0	0	0	4	14	14	0	0	0	4	14	14	0	0	0	4	14	14	63.8	63.8	63.8	17.718	152	152;33;34;82	0	113.77	0	0	0	27	63.8
sp|P46779|RL28_HUMAN;tr|H0YKD8|H0YKD8_HUMAN;tr|H0YMF4|H0YMF4_HUMAN;tr|H0YLP6|H0YLP6_HUMAN	sp|P46779|RL28_HUMAN;tr|H0YKD8|H0YKD8_HUMAN;tr|H0YMF4|H0YMF4_HUMAN	91303000	203220000	214490000	1	1	1	91303000	203220000	214490000	10;9;7;4	10;9;7;4	10;9;7;4	sp|P46779|RL28_HUMAN 60S ribosomal protein L28 OS=Homo sapiens GN=RPL28 PE=1 SV=3;tr|H0YKD8|H0YKD8_HUMAN 60S ribosomal protein L28 OS=Homo sapiens GN=RPL28 PE=1 SV=1;tr|H0YMF4|H0YMF4_HUMAN 60S ribosomal protein L28 OS=Homo sapiens GN=RPL28 PE=1 SV=1	4	10	10	10	0	0	0	6	7	8	0	0	0	6	7	8	0	0	0	6	7	8	51.1	51.1	51.1	15.747	137	137;170;112;89	0	116.26	0	0	0	38.7	45.3
sp|Q9BQG0|MBB1A_HUMAN;tr|I3L1L3|I3L1L3_HUMAN;tr|I3L2H8|I3L2H8_HUMAN	sp|Q9BQG0|MBB1A_HUMAN;tr|I3L1L3|I3L1L3_HUMAN	1	144760000	186790000	1	1	1	1	144760000	186790000	18;17;2	18;17;2	18;17;2	sp|Q9BQG0|MBB1A_HUMAN Myb-binding protein 1A OS=Homo sapiens GN=MYBBP1A PE=1 SV=2;tr|I3L1L3|I3L1L3_HUMAN Myb-binding protein 1A (Fragment) OS=Homo sapiens GN=MYBBP1A PE=1 SV=1	3	18	18	18	0	0	0	0	16	16	0	0	0	0	16	16	0	0	0	0	16	16	14.8	14.8	14.8	148.85	1328	1328;1252;204	0	262.97	0	0	0	0	13.3
sp|P18077|RL35A_HUMAN;tr|C9K025|C9K025_HUMAN;tr|F8WB72|F8WB72_HUMAN;tr|F8WBS5|F8WBS5_HUMAN	sp|P18077|RL35A_HUMAN;tr|C9K025|C9K025_HUMAN;tr|F8WB72|F8WB72_HUMAN;tr|F8WBS5|F8WBS5_HUMAN	27376000	123000000	183970000	1	1	1	27376000	123000000	183970000	9;7;6;6	9;7;6;6	9;7;6;6	sp|P18077|RL35A_HUMAN 60S ribosomal protein L35a OS=Homo sapiens GN=RPL35A PE=1 SV=2;tr|C9K025|C9K025_HUMAN 60S ribosomal protein L35a (Fragment) OS=Homo sapiens GN=RPL35A PE=1 SV=1;tr|F8WB72|F8WB72_HUMAN 60S ribosomal protein L35a OS=Homo sapiens GN=RPL35	4	9	9	9	0	0	0	5	9	5	0	0	0	5	9	5	0	0	0	5	9	5	47.3	47.3	47.3	12.538	110	110;94;57;419	0	53.873	0	0	0	22.7	47.3
sp|Q9NR30|DDX21_HUMAN	sp|Q9NR30|DDX21_HUMAN	14552000	165850000	174240000	1	1	1	14552000	165850000	174240000	14	14	12	sp|Q9NR30|DDX21_HUMAN Nucleolar RNA helicase 2 OS=Homo sapiens GN=DDX21 PE=1 SV=5	1	14	14	12	0	0	0	5	13	10	0	0	0	5	13	10	0	0	0	3	12	9	20.7	20.7	17.2	87.343	783	783	0	124.72	0	0	0	7.4	18.8
tr|D3YTB1|D3YTB1_HUMAN;sp|P62910|RL32_HUMAN;tr|F8W727|F8W727_HUMAN;tr|D3YTI8|D3YTI8_HUMAN	tr|D3YTB1|D3YTB1_HUMAN;sp|P62910|RL32_HUMAN;tr|F8W727|F8W727_HUMAN	62337000	179710000	172500000	1	1	1	62337000	179710000	172500000	11;11;11;1	11;11;11;1	11;11;11;1	tr|D3YTB1|D3YTB1_HUMAN 60S ribosomal protein L32 (Fragment) OS=Homo sapiens GN=RPL32 PE=1 SV=1;sp|P62910|RL32_HUMAN 60S ribosomal protein L32 OS=Homo sapiens GN=RPL32 PE=1 SV=2;tr|F8W727|F8W727_HUMAN 60S ribosomal protein L32 OS=Homo sapiens GN=RPL32 PE=1	4	11	11	11	0	0	0	5	9	9	0	0	0	5	9	9	0	0	0	5	9	9	44.4	44.4	44.4	15.616	133	133;135;153;62	0	86.853	0	0	0	34.6	36.8
sp|P46087|NOP2_HUMAN;tr|A0A087WV73|A0A087WV73_HUMAN;tr|F5GYR3|F5GYR3_HUMAN;tr|F5H5X6|F5H5X6_HUMAN;tr|F5H359|F5H359_HUMAN;tr|F5H8G6|F5H8G6_HUMAN;tr|F5GWB7|F5GWB7_HUMAN;tr|F5H709|F5H709_HUMAN	sp|P46087|NOP2_HUMAN;tr|A0A087WV73|A0A087WV73_HUMAN	3024500	215130000	168150000	1	1	1	3024500	215130000	168150000	13;13;5;4;1;1;1;1	13;13;5;4;1;1;1;1	13;13;5;4;1;1;1;1	sp|P46087|NOP2_HUMAN Probable 28S rRNA (cytosine(4447)-C(5))-methyltransferase OS=Homo sapiens GN=NOP2 PE=1 SV=2;tr|A0A087WV73|A0A087WV73_HUMAN Probable 28S rRNA (cytosine(4447)-C(5))-methyltransferase OS=Homo sapiens GN=NOP2 PE=1 SV=1	8	13	13	13	0	0	0	2	11	11	0	0	0	2	11	11	0	0	0	2	11	11	21.9	21.9	21.9	89.301	812	812;855;275;250;81;98;159;372	0	103.49	0	0	0	3	20.1
sp|P60866|RS20_HUMAN;tr|E5RJX2|E5RJX2_HUMAN;tr|G3XAN0|G3XAN0_HUMAN;tr|E5RIP1|E5RIP1_HUMAN	sp|P60866|RS20_HUMAN;tr|E5RJX2|E5RJX2_HUMAN;tr|G3XAN0|G3XAN0_HUMAN;tr|E5RIP1|E5RIP1_HUMAN	37648000	130050000	156390000	1	1	1	37648000	130050000	156390000	4;2;2;2	4;2;2;2	4;2;2;2	sp|P60866|RS20_HUMAN 40S ribosomal protein S20 OS=Homo sapiens GN=RPS20 PE=1 SV=1;tr|E5RJX2|E5RJX2_HUMAN 40S ribosomal protein S20 OS=Homo sapiens GN=RPS20 PE=1 SV=1;tr|G3XAN0|G3XAN0_HUMAN 40S ribosomal protein S20 OS=Homo sapiens GN=RPS20 PE=1 SV=1;tr|E5R	4	4	4	4	1	0	1	2	3	4	1	0	1	2	3	4	1	0	1	2	3	4	23.5	23.5	23.5	13.373	119	119;61;64;261	0	32.821	10.1	0	10.1	19.3	20.2
sp|P49207|RL34_HUMAN	sp|P49207|RL34_HUMAN	69568000	145910000	155430000	1	1	1	69568000	145910000	155430000	5	5	5	sp|P49207|RL34_HUMAN 60S ribosomal protein L34 OS=Homo sapiens GN=RPL34 PE=1 SV=3	1	5	5	5	1	0	0	3	4	5	1	0	0	3	4	5	1	0	0	3	4	5	22.2	22.2	22.2	13.293	117	117	0	33.825	6.8	0	0	15.4	16.2
sp|Q8IY81|SPB1_HUMAN;tr|J3KS74|J3KS74_HUMAN;tr|J3QSE2|J3QSE2_HUMAN;tr|J3KS36|J3KS36_HUMAN;tr|J3QRS5|J3QRS5_HUMAN;tr|J3QR05|J3QR05_HUMAN	sp|Q8IY81|SPB1_HUMAN	1	150390000	135990000	1	1	1	1	150390000	135990000	19;2;2;2;1;1	19;2;2;2;1;1	19;2;2;2;1;1	sp|Q8IY81|SPB1_HUMAN pre-rRNA processing protein FTSJ3 OS=Homo sapiens GN=FTSJ3 PE=1 SV=2	6	19	19	19	0	0	0	1	16	14	0	0	0	1	16	14	0	0	0	1	16	14	28	28	28	96.557	847	847;67;115;151;33;40	0	172.19	0	0	0	0.9	26.8
sp|P62888|RL30_HUMAN;tr|E5RI99|E5RI99_HUMAN;tr|A0A0B4J213|A0A0B4J213_HUMAN;tr|E5RJH3|E5RJH3_HUMAN;tr|A0A0C4DH44|A0A0C4DH44_HUMAN	sp|P62888|RL30_HUMAN;tr|E5RI99|E5RI99_HUMAN	18897000	146520000	135620000	1	1	1	18897000	146520000	135620000	6;5;2;2;2	6;5;2;2;2	6;5;2;2;2	sp|P62888|RL30_HUMAN 60S ribosomal protein L30 OS=Homo sapiens GN=RPL30 PE=1 SV=2;tr|E5RI99|E5RI99_HUMAN 60S ribosomal protein L30 (Fragment) OS=Homo sapiens GN=RPL30 PE=1 SV=1	5	6	6	6	0	0	0	3	6	4	0	0	0	3	6	4	0	0	0	3	6	4	52.2	52.2	52.2	12.784	115	115;114;51;56;96	0	42.189	0	0	0	17.4	52.2
sp|P22087|FBRL_HUMAN;tr|M0R299|M0R299_HUMAN;tr|M0QXL5|M0QXL5_HUMAN;tr|M0R2Q4|M0R2Q4_HUMAN;tr|M0R0P1|M0R0P1_HUMAN;tr|M0R2U2|M0R2U2_HUMAN;tr|M0R2B0|M0R2B0_HUMAN;tr|M0R1H0|M0R1H0_HUMAN	sp|P22087|FBRL_HUMAN;tr|M0R299|M0R299_HUMAN;tr|M0QXL5|M0QXL5_HUMAN;tr|M0R2Q4|M0R2Q4_HUMAN;tr|M0R0P1|M0R0P1_HUMAN;tr|M0R2U2|M0R2U2_HUMAN;tr|M0R2B0|M0R2B0_HUMAN;tr|M0R1H0|M0R1H0_HUMAN	1	197840000	133130000	1	1	1	1	197840000	133130000	10;9;9;8;7;6;6;6	10;9;9;8;7;6;6;6	9;8;8;7;6;6;6;6	sp|P22087|FBRL_HUMAN rRNA 2-O-methyltransferase fibrillarin OS=Homo sapiens GN=FBL PE=1 SV=2;tr|M0R299|M0R299_HUMAN rRNA 2-O-methyltransferase fibrillarin (Fragment) OS=Homo sapiens GN=FBL PE=1 SV=1;tr|M0QXL5|M0QXL5_HUMAN rRNA 2-O-methyltransferase fibr	8	10	10	9	0	0	0	1	6	8	0	0	0	1	6	8	0	0	0	1	5	7	33.6	33.6	30.2	33.784	321	321;229;584;498;648;157;182;980	0	100.57	0	0	0	4	26.2
sp|P62857|RS28_HUMAN	sp|P62857|RS28_HUMAN	64755000	129850000	131680000	1	1	1	64755000	129850000	131680000	2	2	2	sp|P62857|RS28_HUMAN 40S ribosomal protein S28 OS=Homo sapiens GN=RPS28 PE=1 SV=1	1	2	2	2	1	1	1	2	2	2	1	1	1	2	2	2	1	1	1	2	2	2	30.4	30.4	30.4	7.8409	69	69	0	14.072	17.4	17.4	17.4	30.4	30.4
tr|M0R3D6|M0R3D6_HUMAN;tr|M0R1A7|M0R1A7_HUMAN;sp|Q02543|RL18A_HUMAN;tr|M0R117|M0R117_HUMAN;tr|M0R0P7|M0R0P7_HUMAN	tr|M0R3D6|M0R3D6_HUMAN;tr|M0R1A7|M0R1A7_HUMAN;sp|Q02543|RL18A_HUMAN;tr|M0R117|M0R117_HUMAN;tr|M0R0P7|M0R0P7_HUMAN	41306000	355490000	130840000	1	1	1	41306000	355490000	130840000	11;11;11;10;8	11;11;11;10;8	11;11;11;10;8	tr|M0R3D6|M0R3D6_HUMAN 60S ribosomal protein L18a (Fragment) OS=Homo sapiens GN=RPL18A PE=1 SV=1;tr|M0R1A7|M0R1A7_HUMAN 60S ribosomal protein L18a OS=Homo sapiens GN=RPL18A PE=1 SV=1;sp|Q02543|RL18A_HUMAN 60S ribosomal protein L18a OS=Homo sapiens GN=RPL18	5	11	11	11	1	0	0	2	10	9	1	0	0	2	10	9	1	0	0	2	10	9	53.9	53.9	53.9	16.714	141	141;147;176;154;137	0	70.078	7.1	0	0	12.8	52.5
sp|O43143|DHX15_HUMAN;sp|O60231|DHX16_HUMAN;tr|F5H658|F5H658_HUMAN;sp|Q14562|DHX8_HUMAN	sp|O43143|DHX15_HUMAN	1.58714	110130000	118050000	5353200	1	1	8496300	110130000	118050000	22;1;1;1	22;1;1;1	22;1;1;1	sp|O43143|DHX15_HUMAN Pre-mRNA-splicing factor ATP-dependent RNA helicase DHX15 OS=Homo sapiens GN=DHX15 PE=1 SV=2	4	22	22	22	3	1	2	3	19	16	3	1	2	3	19	16	3	1	2	3	19	16	28.1	28.1	28.1	90.932	795	795;1041;1181;1220	0	163.13	4.8	1.5	2.9	3.9	24.4
tr|E7ETK0|E7ETK0_HUMAN;tr|A0A087WUS0|A0A087WUS0_HUMAN;sp|P62847|RS24_HUMAN	tr|E7ETK0|E7ETK0_HUMAN;tr|A0A087WUS0|A0A087WUS0_HUMAN;sp|P62847|RS24_HUMAN	6689200	96232000	111500000	1	1	1	6689200	96232000	111500000	5;5;5	5;5;5	5;5;5	tr|E7ETK0|E7ETK0_HUMAN 40S ribosomal protein S24 OS=Homo sapiens GN=RPS24 PE=1 SV=1;tr|A0A087WUS0|A0A087WUS0_HUMAN 40S ribosomal protein S24 OS=Homo sapiens GN=RPS24 PE=1 SV=1;sp|P62847|RS24_HUMAN 40S ribosomal protein S24 OS=Homo sapiens GN=RPS24 PE=1 SV=	3	5	5	5	0	0	0	2	5	5	0	0	0	2	5	5	0	0	0	2	5	5	35.9	35.9	35.9	15.197	131	131;132;133	0	46.198	0	0	0	20.6	35.9
sp|Q08211|DHX9_HUMAN	sp|Q08211|DHX9_HUMAN	22450000	109110000	109290000	1	1	1	22450000	109110000	109290000	25	25	25	sp|Q08211|DHX9_HUMAN ATP-dependent RNA helicase A OS=Homo sapiens GN=DHX9 PE=1 SV=4	1	25	25	25	3	0	0	7	20	15	3	0	0	7	20	15	3	0	0	7	20	15	23.1	23.1	23.1	140.96	1270	1270	0	207.4	3.2	0	0	6.3	19.6
sp|P16989|YBOX3_HUMAN;tr|A0A0D9SEI8|A0A0D9SEI8_HUMAN;sp|Q9Y2T7|YBOX2_HUMAN	sp|P16989|YBOX3_HUMAN	7.59166	124390000	107310000	4710300	1	1	35759000	124390000	107310000	15;4;4	15;4;4	9;1;0	sp|P16989|YBOX3_HUMAN Y-box-binding protein 3 OS=Homo sapiens GN=YBX3 PE=1 SV=4	3	15	15	9	2	0	0	5	13	12	2	0	0	5	13	12	0	0	0	2	8	6	62.1	62.1	51.1	40.089	372	372;92;364	0	137.07	8.6	0	0	24.5	59.4
sp|O00567|NOP56_HUMAN;tr|H0YDU4|H0YDU4_HUMAN;tr|H0Y653|H0Y653_HUMAN;tr|Q5JXT2|Q5JXT2_HUMAN	sp|O00567|NOP56_HUMAN;tr|H0YDU4|H0YDU4_HUMAN	1	116500000	106830000	1	1	1	1	116500000	106830000	18;9;8;7	18;9;8;7	18;9;8;7	sp|O00567|NOP56_HUMAN Nucleolar protein 56 OS=Homo sapiens GN=NOP56 PE=1 SV=4;tr|H0YDU4|H0YDU4_HUMAN Nucleolar protein 56 (Fragment) OS=Homo sapiens GN=NOP56 PE=1 SV=1	4	18	18	18	0	0	0	1	18	15	0	0	0	1	18	15	0	0	0	1	18	15	32	32	32	66.049	594	594;252;219;281	0	255.44	0	0	0	2.2	32
tr|C9JXB8|C9JXB8_HUMAN;tr|C9JNW5|C9JNW5_HUMAN;sp|P83731|RL24_HUMAN	tr|C9JXB8|C9JXB8_HUMAN;tr|C9JNW5|C9JNW5_HUMAN;sp|P83731|RL24_HUMAN	1	1	106210000	1	1	1	1	1	106210000	2;2;2	2;2;2	2;2;2	tr|C9JXB8|C9JXB8_HUMAN 60S ribosomal protein L24 OS=Homo sapiens GN=RPL24 PE=1 SV=1;tr|C9JNW5|C9JNW5_HUMAN 60S ribosomal protein L24 OS=Homo sapiens GN=RPL24 PE=1 SV=1;sp|P83731|RL24_HUMAN 60S ribosomal protein L24 OS=Homo sapiens GN=RPL24 PE=1 SV=1	3	2	2	2	0	0	0	1	1	2	0	0	0	1	1	2	0	0	0	1	1	2	17.4	17.4	17.4	14.369	121	121;150;157	0	13.21	0	0	0	10.7	10.7
sp|O76021|RL1D1_HUMAN;tr|J3QSV6|J3QSV6_HUMAN;tr|I3L3U9|I3L3U9_HUMAN;tr|I3L3C4|I3L3C4_HUMAN;tr|I3L234|I3L234_HUMAN;tr|J3KPU7|J3KPU7_HUMAN;tr|I3L2F2|I3L2F2_HUMAN;tr|I3L4T8|I3L4T8_HUMAN;tr|I3L1Y4|I3L1Y4_HUMAN	sp|O76021|RL1D1_HUMAN;tr|J3QSV6|J3QSV6_HUMAN;tr|I3L3U9|I3L3U9_HUMAN	1	93033000	104640000	1	1	1	1	93033000	104640000	11;9;6;5;3;1;1;1;1	11;9;6;5;3;1;1;1;1	11;9;6;5;3;1;1;1;1	sp|O76021|RL1D1_HUMAN Ribosomal L1 domain-containing protein 1 OS=Homo sapiens GN=RSL1D1 PE=1 SV=3;tr|J3QSV6|J3QSV6_HUMAN Ribosomal L1 domain-containing protein 1 (Fragment) OS=Homo sapiens GN=RSL1D1 PE=1 SV=1;tr|I3L3U9|I3L3U9_HUMAN Ribosomal L1 domain-con	9	11	11	11	0	0	0	0	9	6	0	0	0	0	9	6	0	0	0	0	9	6	24.9	24.9	24.9	54.972	490	490;430;296;158;98;39;43;46;47	0	72.221	0	0	0	0	21.6
tr|A0A087WXM6|A0A087WXM6_HUMAN;tr|J3QQT2|J3QQT2_HUMAN;tr|J3KRX5|J3KRX5_HUMAN;sp|P18621|RL17_HUMAN;tr|A0A0A6YYL6|A0A0A6YYL6_HUMAN;tr|J3QLC8|J3QLC8_HUMAN;tr|A0A0A0MRF8|A0A0A0MRF8_HUMAN;tr|J3KRB3|J3KRB3_HUMAN;tr|A0A087WWH0|A0A087WWH0_HUMAN;tr|J3QS96|J3QS96_HUMAN;tr|A0A087WY81|A0A087WY81_HUMAN;tr|J3KSJ0|J3KSJ0_HUMAN	tr|A0A087WXM6|A0A087WXM6_HUMAN;tr|J3QQT2|J3QQT2_HUMAN;tr|J3KRX5|J3KRX5_HUMAN;sp|P18621|RL17_HUMAN;tr|A0A0A6YYL6|A0A0A6YYL6_HUMAN;tr|J3QLC8|J3QLC8_HUMAN;tr|A0A0A0MRF8|A0A0A0MRF8_HUMAN;tr|J3KRB3|J3KRB3_HUMAN;tr|A0A087WWH0|A0A087WWH0_HUMAN;tr|J3QS96|J3QS96_HUMAN;tr|A0A087WY81|A0A087WY81_HUMAN	13413000	144580000	103030000	1	1	1	13413000	144580000	103030000	9;9;9;9;9;8;8;7;7;7;5;2	9;9;9;9;9;8;8;7;7;7;5;2	9;9;9;9;9;8;8;7;7;7;5;2	tr|A0A087WXM6|A0A087WXM6_HUMAN 60S ribosomal protein L17 (Fragment) OS=Homo sapiens GN=RPL17 PE=1 SV=1;tr|J3QQT2|J3QQT2_HUMAN 60S ribosomal protein L17 (Fragment) OS=Homo sapiens GN=RPL17 PE=1 SV=1;tr|J3KRX5|J3KRX5_HUMAN 60S ribosomal protein L17 (Fragment	12	9	9	9	0	0	0	2	8	8	0	0	0	2	8	8	0	0	0	2	8	8	46.2	46.2	46.2	19.586	169	169;171;174;184;228;174;631;129;132;138;98;56	0	63.308	0	0	0	14.2	41.4
sp|Q15050|RRS1_HUMAN	sp|Q15050|RRS1_HUMAN	1	126000000	102620000	1	1	1	1	126000000	102620000	13	13	13	sp|Q15050|RRS1_HUMAN Ribosome biogenesis regulatory protein homolog OS=Homo sapiens GN=RRS1 PE=1 SV=2	1	13	13	13	0	0	0	1	12	7	0	0	0	1	12	7	0	0	0	1	12	7	35.6	35.6	35.6	41.193	365	365	0	120.01	0	0	0	3.3	33.4
sp|P42766|RL35_HUMAN;tr|F2Z388|F2Z388_HUMAN	sp|P42766|RL35_HUMAN;tr|F2Z388|F2Z388_HUMAN	29860000	126110000	99906000	1	1	1	29860000	126110000	99906000	4;3	4;3	4;3	sp|P42766|RL35_HUMAN 60S ribosomal protein L35 OS=Homo sapiens GN=RPL35 PE=1 SV=2;tr|F2Z388|F2Z388_HUMAN 60S ribosomal protein L35 OS=Homo sapiens GN=RPL35 PE=1 SV=1	2	4	4	4	0	0	0	3	3	2	0	0	0	3	3	2	0	0	0	3	3	2	29.3	29.3	29.3	14.551	123	123;659	0	32.015	0	0	0	26	29.3
tr|M0R0F0|M0R0F0_HUMAN;sp|P46782|RS5_HUMAN;tr|M0R0R2|M0R0R2_HUMAN;tr|M0QZN2|M0QZN2_HUMAN	tr|M0R0F0|M0R0F0_HUMAN;sp|P46782|RS5_HUMAN;tr|M0R0R2|M0R0R2_HUMAN;tr|M0QZN2|M0QZN2_HUMAN	60211000	84267000	97535000	1	1	1	60211000	84267000	97535000	7;7;7;5	7;7;7;5	7;7;7;5	tr|M0R0F0|M0R0F0_HUMAN 40S ribosomal protein S5 (Fragment) OS=Homo sapiens GN=RPS5 PE=1 SV=1;sp|P46782|RS5_HUMAN 40S ribosomal protein S5 OS=Homo sapiens GN=RPS5 PE=1 SV=4;tr|M0R0R2|M0R0R2_HUMAN 40S ribosomal protein S5 OS=Homo sapiens GN=RPS5 PE=1 SV=1;tr	4	7	7	7	0	1	1	3	7	5	0	1	1	3	7	5	0	1	1	3	7	5	30	30	30	22.391	200	200;204;225;370	0	67.272	0	8.5	8.5	17	30
sp|Q9Y2X3|NOP58_HUMAN;tr|F8WED0|F8WED0_HUMAN;tr|H7BZ72|H7BZ72_HUMAN	sp|Q9Y2X3|NOP58_HUMAN	1	83014000	93827000	1	1	1	1	83014000	93827000	13;2;2	13;2;2	13;2;2	sp|Q9Y2X3|NOP58_HUMAN Nucleolar protein 58 OS=Homo sapiens GN=NOP58 PE=1 SV=1	3	13	13	13	0	0	0	2	12	9	0	0	0	2	12	9	0	0	0	2	12	9	29.5	29.5	29.5	59.578	529	529;68;187	0	121.47	0	0	0	4.3	29.5
sp|Q92900|RENT1_HUMAN	sp|Q92900|RENT1_HUMAN	1	69420000	90600000	1	1	1	1	69420000	90600000	23	23	23	sp|Q92900|RENT1_HUMAN Regulator of nonsense transcripts 1 OS=Homo sapiens GN=UPF1 PE=1 SV=2	1	23	23	23	0	0	0	0	17	17	0	0	0	0	17	17	0	0	0	0	17	17	27.5	27.5	27.5	124.34	1129	1129	0	169.18	0	0	0	0	21.2
sp|P67809|YBOX1_HUMAN;tr|A0A087X1S2|A0A087X1S2_HUMAN;tr|H0Y449|H0Y449_HUMAN;tr|C9J5V9|C9J5V9_HUMAN	sp|P67809|YBOX1_HUMAN;tr|A0A087X1S2|A0A087X1S2_HUMAN;tr|H0Y449|H0Y449_HUMAN	1	143290000	88864000	1	1	1	1	143290000	88864000	11;10;8;4	5;4;5;3	5;4;5;3	sp|P67809|YBOX1_HUMAN Nuclease-sensitive element-binding protein 1 OS=Homo sapiens GN=YBX1 PE=1 SV=3;tr|A0A087X1S2|A0A087X1S2_HUMAN Nuclease-sensitive element-binding protein 1 OS=Homo sapiens GN=YBX1 PE=1 SV=2;tr|H0Y449|H0Y449_HUMAN Nuclease-sensitive ele	4	11	5	5	2	1	0	4	10	10	0	1	0	1	5	4	0	1	0	1	5	4	43.8	31.2	31.2	35.924	324	324;320;374;216	0	111.28	9.9	9.3	0	18.2	43.8
sp|O00541|PESC_HUMAN;tr|B5MCF9|B5MCF9_HUMAN;tr|B3KXD6|B3KXD6_HUMAN	sp|O00541|PESC_HUMAN;tr|B5MCF9|B5MCF9_HUMAN	1	75183000	88540000	1	1	1	1	75183000	88540000	12;12;4	12;12;4	12;12;4	sp|O00541|PESC_HUMAN Pescadillo homolog OS=Homo sapiens GN=PES1 PE=1 SV=1;tr|B5MCF9|B5MCF9_HUMAN Pescadillo homolog OS=Homo sapiens GN=PES1 PE=1 SV=1	3	12	12	12	0	0	0	0	10	11	0	0	0	0	10	11	0	0	0	0	10	11	17.5	17.5	17.5	68.002	588	588;571;449	0	78.55	0	0	0	0	14.6
tr|B1ANR0|B1ANR0_HUMAN;sp|Q13310|PABP4_HUMAN;tr|H0Y5F5|H0Y5F5_HUMAN;tr|H0YEU6|H0YEU6_HUMAN;tr|B1ANR1|B1ANR1_HUMAN;tr|H0YCC8|H0YCC8_HUMAN;tr|H0Y6X6|H0Y6X6_HUMAN;tr|H0YER0|H0YER0_HUMAN;sp|P0CB38|PAB4L_HUMAN	tr|B1ANR0|B1ANR0_HUMAN;sp|Q13310|PABP4_HUMAN;tr|H0Y5F5|H0Y5F5_HUMAN	16212000	4.55514	87172000	1	6288500	1	16212000	28645000	87172000	19;19;15;9;4;4;2;1;1	11;11;10;7;1;1;2;1;1	11;11;10;7;1;1;2;1;1	tr|B1ANR0|B1ANR0_HUMAN Polyadenylate-binding protein OS=Homo sapiens GN=PABPC4 PE=1 SV=1;sp|Q13310|PABP4_HUMAN Polyadenylate-binding protein 4 OS=Homo sapiens GN=PABPC4 PE=1 SV=1;tr|H0Y5F5|H0Y5F5_HUMAN Polyadenylate-binding protein (Fragment) OS=Homo sapie	9	19	11	11	3	4	2	7	11	14	1	2	0	4	7	7	1	2	0	4	7	7	28.1	17.7	17.7	67.97	615	615;644;550;249;129;197;195;68;370	0	77.093	6.5	8.8	4.6	13.7	20.2
sp|Q9UNX3|RL26L_HUMAN;tr|E5RIT6|E5RIT6_HUMAN;tr|E5RHH1|E5RHH1_HUMAN	sp|Q9UNX3|RL26L_HUMAN;tr|E5RIT6|E5RIT6_HUMAN	17494000	79508000	86330000	1	1	1	17494000	79508000	86330000	9;8;4	9;8;4	2;1;1	sp|Q9UNX3|RL26L_HUMAN 60S ribosomal protein L26-like 1 OS=Homo sapiens GN=RPL26L1 PE=1 SV=1;tr|E5RIT6|E5RIT6_HUMAN 60S ribosomal protein L26-like 1 (Fragment) OS=Homo sapiens GN=RPL26L1 PE=1 SV=1	3	9	9	2	0	0	0	3	6	9	0	0	0	3	6	9	0	0	0	0	2	2	45.5	45.5	11.7	17.256	145	145;128;39	0	57.846	0	0	0	20	39.3
sp|P62753|RS6_HUMAN;tr|A2A3R5|A2A3R5_HUMAN;tr|A2A3R7|A2A3R7_HUMAN	sp|P62753|RS6_HUMAN;tr|A2A3R5|A2A3R5_HUMAN;tr|A2A3R7|A2A3R7_HUMAN	1	149840000	78415000	1	1	1	1	149840000	78415000	6;4;3	6;4;3	6;4;3	sp|P62753|RS6_HUMAN 40S ribosomal protein S6 OS=Homo sapiens GN=RPS6 PE=1 SV=1;tr|A2A3R5|A2A3R5_HUMAN 40S ribosomal protein S6 OS=Homo sapiens GN=RPS6 PE=1 SV=1;tr|A2A3R7|A2A3R7_HUMAN 40S ribosomal protein S6 OS=Homo sapiens GN=RPS6 PE=1 SV=1	3	6	6	6	0	0	0	1	4	6	0	0	0	1	4	6	0	0	0	1	4	6	18.9	18.9	18.9	28.68	249	249;218;91	0	58.199	0	0	0	4.8	16.9
sp|P38432|COIL_HUMAN	sp|P38432|COIL_HUMAN	1	62826000	78330000	1	1	1	1	62826000	78330000	7	7	7	sp|P38432|COIL_HUMAN Coilin OS=Homo sapiens GN=COIL PE=1 SV=1	1	7	7	7	0	0	0	0	6	6	0	0	0	0	6	6	0	0	0	0	6	6	12.5	12.5	12.5	62.608	576	576	0	94.765	0	0	0	0	10.9
sp|Q6P2Q9|PRP8_HUMAN;tr|I3L0J9|I3L0J9_HUMAN;tr|I3L3Z8|I3L3Z8_HUMAN;tr|I3L1T8|I3L1T8_HUMAN	sp|Q6P2Q9|PRP8_HUMAN	0.693807	8.01307	74439000	26983000	6367100	1	18721000	51020000	74439000	36;16;3;1	36;16;3;1	36;16;3;1	sp|Q6P2Q9|PRP8_HUMAN Pre-mRNA-processing-splicing factor 8 OS=Homo sapiens GN=PRPF8 PE=1 SV=2	4	36	36	36	12	2	1	9	20	20	12	2	1	9	20	20	12	2	1	9	20	20	18.5	18.5	18.5	273.6	2335	2335;1013;250;376	0	264.88	6.5	1.5	0.4	4.2	11.1
sp|Q8TDN6|BRX1_HUMAN	sp|Q8TDN6|BRX1_HUMAN	14444000	161860000	73302000	1	1	1	14444000	161860000	73302000	9	9	9	sp|Q8TDN6|BRX1_HUMAN Ribosome biogenesis protein BRX1 homolog OS=Homo sapiens GN=BRIX1 PE=1 SV=2	1	9	9	9	0	0	0	2	8	7	0	0	0	2	8	7	0	0	0	2	8	7	33.4	33.4	33.4	41.401	353	353	0	69.183	0	0	0	5.7	30
sp|Q9UKD2|MRT4_HUMAN	sp|Q9UKD2|MRT4_HUMAN	9824500	36614000	73162000	1	1	1	9824500	36614000	73162000	12	12	12	sp|Q9UKD2|MRT4_HUMAN mRNA turnover protein 4 homolog OS=Homo sapiens GN=MRTO4 PE=1 SV=2	1	12	12	12	0	0	0	2	10	9	0	0	0	2	10	9	0	0	0	2	10	9	39.3	39.3	39.3	27.56	239	239	0	77.167	0	0	0	8.4	35.1
tr|F8W7C6|F8W7C6_HUMAN;tr|A0A087WV22|A0A087WV22_HUMAN;tr|X1WI28|X1WI28_HUMAN;sp|P27635|RL10_HUMAN;tr|H7C123|H7C123_HUMAN;tr|H7C2C5|H7C2C5_HUMAN;sp|Q96L21|RL10L_HUMAN;tr|H7C2U2|H7C2U2_HUMAN;tr|B8A6G2|B8A6G2_HUMAN;tr|A6QRI9|A6QRI9_HUMAN	tr|F8W7C6|F8W7C6_HUMAN;tr|A0A087WV22|A0A087WV22_HUMAN;tr|X1WI28|X1WI28_HUMAN;sp|P27635|RL10_HUMAN;tr|H7C123|H7C123_HUMAN;tr|H7C2C5|H7C2C5_HUMAN	3948400	78084000	72252000	1	1	1	3948400	78084000	72252000	8;7;7;7;5;5;3;1;1;1	8;7;7;7;5;5;3;1;1;1	8;7;7;7;5;5;3;1;1;1	tr|F8W7C6|F8W7C6_HUMAN 60S ribosomal protein L10 OS=Homo sapiens GN=RPL10 PE=1 SV=2;tr|A0A087WV22|A0A087WV22_HUMAN 60S ribosomal protein L10 OS=Homo sapiens GN=RPL10 PE=1 SV=1;tr|X1WI28|X1WI28_HUMAN 60S ribosomal protein L10 (Fragment) OS=Homo sapiens GN=R	10	8	8	8	0	0	0	2	7	7	0	0	0	2	7	7	0	0	0	2	7	7	44.2	44.2	44.2	18.565	163	163;178;201;214;91;131;214;28;108;181	0	61.393	0	0	0	15.3	33.1
sp|Q9H7B2|RPF2_HUMAN;tr|Q5VXN0|Q5VXN0_HUMAN	sp|Q9H7B2|RPF2_HUMAN;tr|Q5VXN0|Q5VXN0_HUMAN	1	83556000	70587000	1	1	1	1	83556000	70587000	6;5	6;5	6;5	sp|Q9H7B2|RPF2_HUMAN Ribosome production factor 2 homolog OS=Homo sapiens GN=RPF2 PE=1 SV=2;tr|Q5VXN0|Q5VXN0_HUMAN Ribosome production factor 2 homolog (Fragment) OS=Homo sapiens GN=RPF2 PE=1 SV=1	2	6	6	6	0	0	0	0	6	5	0	0	0	0	6	5	0	0	0	0	6	5	21.2	21.2	21.2	35.582	306	306;214	0	59.041	0	0	0	0	21.2
sp|Q13823|NOG2_HUMAN;tr|H0YG10|H0YG10_HUMAN	sp|Q13823|NOG2_HUMAN	1	68292000	67382000	1	1	1	1	68292000	67382000	14;5	14;5	14;5	sp|Q13823|NOG2_HUMAN Nucleolar GTP-binding protein 2 OS=Homo sapiens GN=GNL2 PE=1 SV=1	2	14	14	14	0	0	0	0	10	12	0	0	0	0	10	12	0	0	0	0	10	12	23.1	23.1	23.1	83.654	731	731;233	0	107.83	0	0	0	0	17.5
sp|Q8WTT2|NOC3L_HUMAN	sp|Q8WTT2|NOC3L_HUMAN	1	52091000	63290000	1	1	1	1	52091000	63290000	12	12	12	sp|Q8WTT2|NOC3L_HUMAN Nucleolar complex protein 3 homolog OS=Homo sapiens GN=NOC3L PE=1 SV=1	1	12	12	12	0	0	0	0	10	11	0	0	0	0	10	11	0	0	0	0	10	11	17	17	17	92.547	800	800	0	92.192	0	0	0	0	15.1
sp|A6NHQ2|FBLL1_HUMAN	sp|A6NHQ2|FBLL1_HUMAN	1	1	58193000	1	1	1	1	1	58193000	3	2	2	sp|A6NHQ2|FBLL1_HUMAN rRNA/tRNA 2-O-methyltransferase fibrillarin-like protein 1 OS=Homo sapiens GN=FBLL1 PE=3 SV=2	1	3	2	2	0	0	0	0	1	3	0	0	0	0	0	2	0	0	0	0	0	2	6.9	3.6	3.6	34.803	334	334	0	11.566	0	0	0	0	3.3
sp|Q6PKG0|LARP1_HUMAN;tr|A0A0B4J210|A0A0B4J210_HUMAN;tr|E5RH50|E5RH50_HUMAN;tr|H0YC33|H0YC33_HUMAN;tr|E5RHK4|E5RHK4_HUMAN;tr|H0YAN4|H0YAN4_HUMAN;tr|H0YBM7|H0YBM7_HUMAN;tr|H0YC73|H0YC73_HUMAN;tr|H0YBW1|H0YBW1_HUMAN;sp|Q659C4|LAR1B_HUMAN	sp|Q6PKG0|LARP1_HUMAN;tr|A0A0B4J210|A0A0B4J210_HUMAN;tr|E5RH50|E5RH50_HUMAN	1	56142000	57755000	1	1	1	1	56142000	57755000	10;8;5;2;1;1;1;1;1;1	10;8;5;2;1;1;1;1;1;1	10;8;5;2;1;1;1;1;1;1	sp|Q6PKG0|LARP1_HUMAN La-related protein 1 OS=Homo sapiens GN=LARP1 PE=1 SV=2;tr|A0A0B4J210|A0A0B4J210_HUMAN La-related protein 1 (Fragment) OS=Homo sapiens GN=LARP1 PE=1 SV=2;tr|E5RH50|E5RH50_HUMAN La-related protein 1 (Fragment) OS=Homo sapiens GN=LARP1	10	10	10	10	0	0	0	0	10	10	0	0	0	0	10	10	0	0	0	0	10	10	17.4	17.4	17.4	123.51	1096	1096;816;611;183;93;150;167;195;281;914	0	112.61	0	0	0	0	17.4
sp|P15880|RS2_HUMAN;tr|H0YEN5|H0YEN5_HUMAN;tr|E9PMM9|E9PMM9_HUMAN;tr|E9PQD7|E9PQD7_HUMAN;tr|E9PPT0|E9PPT0_HUMAN;tr|I3L404|I3L404_HUMAN;tr|E9PM36|E9PM36_HUMAN;tr|H3BNG3|H3BNG3_HUMAN;tr|H0YE27|H0YE27_HUMAN	sp|P15880|RS2_HUMAN;tr|H0YEN5|H0YEN5_HUMAN;tr|E9PMM9|E9PMM9_HUMAN;tr|E9PQD7|E9PQD7_HUMAN;tr|E9PPT0|E9PPT0_HUMAN	1	52567000	57682000	1	1	1	1	52567000	57682000	9;8;6;6;5;4;4;1;1	9;8;6;6;5;4;4;1;1	9;8;6;6;5;4;4;1;1	sp|P15880|RS2_HUMAN 40S ribosomal protein S2 OS=Homo sapiens GN=RPS2 PE=1 SV=2;tr|H0YEN5|H0YEN5_HUMAN 40S ribosomal protein S2 (Fragment) OS=Homo sapiens GN=RPS2 PE=1 SV=1;tr|E9PMM9|E9PMM9_HUMAN 40S ribosomal protein S2 (Fragment) OS=Homo sapiens GN=RPS2 P	9	9	9	9	0	0	0	0	8	5	0	0	0	0	8	5	0	0	0	0	8	5	27.6	27.6	27.6	31.324	293	293;195;218;235;197;155;209;44;63	0	77.267	0	0	0	0	23.9
tr|A0A0B4J1Z1|A0A0B4J1Z1_HUMAN;tr|C9JAB2|C9JAB2_HUMAN;sp|Q16629|SRSF7_HUMAN;tr|F8WEA1|F8WEA1_HUMAN	tr|A0A0B4J1Z1|A0A0B4J1Z1_HUMAN;tr|C9JAB2|C9JAB2_HUMAN;sp|Q16629|SRSF7_HUMAN	2.27294	62524000	57650000	11259000	1	1	25591000	62524000	57650000	7;7;7;1	7;7;7;1	6;6;6;1	tr|A0A0B4J1Z1|A0A0B4J1Z1_HUMAN Serine/arginine-rich-splicing factor 7 OS=Homo sapiens GN=SRSF7 PE=1 SV=1;tr|C9JAB2|C9JAB2_HUMAN Serine/arginine-rich-splicing factor 7 OS=Homo sapiens GN=SRSF7 PE=1 SV=1;sp|Q16629|SRSF7_HUMAN Serine/arginine-rich splicing fa	4	7	7	6	2	0	0	4	7	7	2	0	0	4	7	7	2	0	0	3	6	6	44.5	44.5	44.5	15.763	137	137;235;238;51	0	58.789	15.3	0	0	32.1	44.5
tr|J3KTA4|J3KTA4_HUMAN;sp|P17844|DDX5_HUMAN;tr|J3QSF1|J3QSF1_HUMAN;tr|J3KRZ1|J3KRZ1_HUMAN;tr|J3QRQ7|J3QRQ7_HUMAN;tr|J3QLG9|J3QLG9_HUMAN;tr|J3QR62|J3QR62_HUMAN;tr|X6RLV5|X6RLV5_HUMAN;tr|J3KRX8|J3KRX8_HUMAN;tr|J3QRN5|J3QRN5_HUMAN;tr|J3QR02|J3QR02_HUMAN	tr|J3KTA4|J3KTA4_HUMAN;sp|P17844|DDX5_HUMAN	3.10627	42214000	57395000	5516900	1	1	17137000	42214000	57395000	15;15;5;2;2;1;1;1;1;1;1	12;12;4;1;2;1;1;1;1;1;1	12;12;4;1;2;1;1;1;1;1;1	tr|J3KTA4|J3KTA4_HUMAN Probable ATP-dependent RNA helicase DDX5 OS=Homo sapiens GN=DDX5 PE=1 SV=1;sp|P17844|DDX5_HUMAN Probable ATP-dependent RNA helicase DDX5 OS=Homo sapiens GN=DDX5 PE=1 SV=1	11	15	12	12	5	0	1	7	13	12	3	0	0	5	11	9	3	0	0	5	11	9	27.5	22.5	22.5	69.086	614	614;614;153;166;212;46;52;96;120;293;520	0	84.347	9.1	0	2	13.7	24.6
sp|P62277|RS13_HUMAN;tr|J3KMX5|J3KMX5_HUMAN;tr|E9PS50|E9PS50_HUMAN	sp|P62277|RS13_HUMAN;tr|J3KMX5|J3KMX5_HUMAN	1	51766000	56318000	1	1	1	1	51766000	56318000	6;5;2	6;5;2	6;5;2	sp|P62277|RS13_HUMAN 40S ribosomal protein S13 OS=Homo sapiens GN=RPS13 PE=1 SV=2;tr|J3KMX5|J3KMX5_HUMAN 40S ribosomal protein S13 OS=Homo sapiens GN=RPS13 PE=1 SV=1	3	6	6	6	0	0	0	1	5	5	0	0	0	1	5	5	0	0	0	1	5	5	36.4	36.4	36.4	17.222	151	151;148;540	0	43.072	0	0	0	7.9	30.5
sp|O75643|U520_HUMAN;tr|B4E0P5|B4E0P5_HUMAN	sp|O75643|U520_HUMAN	1.17089	7.60668	55422000	23453000	6231500	1	27461000	47401000	55422000	35;6	35;6	35;6	sp|O75643|U520_HUMAN U5 small nuclear ribonucleoprotein 200 kDa helicase OS=Homo sapiens GN=SNRNP200 PE=1 SV=2	2	35	35	35	17	2	1	15	23	22	17	2	1	15	23	22	17	2	1	15	23	22	19	19	19	244.5	2136	2136;595	0	246.9	9.6	1.1	0.6	8.1	12.6
sp|P38919|IF4A3_HUMAN;tr|I3L3H2|I3L3H2_HUMAN;tr|J3KT04|J3KT04_HUMAN;tr|J3KS93|J3KS93_HUMAN;tr|J3QQP0|J3QQP0_HUMAN;tr|E9PBH4|E9PBH4_HUMAN;tr|F8WE11|F8WE11_HUMAN;tr|E7EMV8|E7EMV8_HUMAN;tr|J3KSN7|J3KSN7_HUMAN	sp|P38919|IF4A3_HUMAN	1.6617	3.64124	54834000	52395000	20724000	1	87065000	75461000	54834000	18;3;1;1;1;1;1;1;1	18;3;1;1;1;1;1;1;1	17;2;0;0;0;0;0;0;0	sp|P38919|IF4A3_HUMAN Eukaryotic initiation factor 4A-III OS=Homo sapiens GN=EIF4A3 PE=1 SV=4	9	18	18	17	7	7	1	9	13	14	7	7	1	9	13	14	7	6	1	9	12	13	39.2	39.2	35.3	46.871	411	411;125;85;85;95;96;97;98;109	0	183.63	16.3	19.2	3.4	20.2	29.9
sp|Q9BYG3|MK67I_HUMAN;tr|C9J6C5|C9J6C5_HUMAN;tr|C9J808|C9J808_HUMAN;tr|H7BZL0|H7BZL0_HUMAN	sp|Q9BYG3|MK67I_HUMAN;tr|C9J6C5|C9J6C5_HUMAN	1	40089000	53303000	1	1	1	1	40089000	53303000	7;4;3;1	7;4;3;1	7;4;3;1	sp|Q9BYG3|MK67I_HUMAN MKI67 FHA domain-interacting nucleolar phosphoprotein OS=Homo sapiens GN=NIFK PE=1 SV=1;tr|C9J6C5|C9J6C5_HUMAN MKI67 FHA domain-interacting nucleolar phosphoprotein (Fragment) OS=Homo sapiens GN=NIFK PE=1 SV=1	4	7	7	7	0	0	0	0	6	7	0	0	0	0	6	7	0	0	0	0	6	7	30	30	30	34.222	293	293;166;165;102	0	120.16	0	0	0	0	30
sp|P25398|RS12_HUMAN	sp|P25398|RS12_HUMAN	12.8769	66073000	53144000	5278900	1	1	67976000	66073000	53144000	3	3	3	sp|P25398|RS12_HUMAN 40S ribosomal protein S12 OS=Homo sapiens GN=RPS12 PE=1 SV=3	1	3	3	3	2	1	1	2	3	3	2	1	1	2	3	3	2	1	1	2	3	3	30.3	30.3	30.3	14.515	132	132	0	56.389	13.6	7.6	6.1	13.6	30.3
sp|P52597|HNRPF_HUMAN	sp|P52597|HNRPF_HUMAN	3.78875	47703000	52895000	10490000	1	1	39744000	47703000	52895000	8	6	6	sp|P52597|HNRPF_HUMAN Heterogeneous nuclear ribonucleoprotein F OS=Homo sapiens GN=HNRNPF PE=1 SV=3	1	8	6	6	5	3	2	6	8	7	3	1	0	4	6	5	3	1	0	4	6	5	27.5	21	21	45.671	415	415	0	96.542	17.6	10.6	6.5	21.4	27.5
sp|Q6DKI1|RL7L_HUMAN;tr|R4GMU7|R4GMU7_HUMAN	sp|Q6DKI1|RL7L_HUMAN;tr|R4GMU7|R4GMU7_HUMAN	1	43144000	52692000	1	1	1	1	43144000	52692000	6;5	6;5	6;5	sp|Q6DKI1|RL7L_HUMAN 60S ribosomal protein L7-like 1 OS=Homo sapiens GN=RPL7L1 PE=1 SV=1;tr|R4GMU7|R4GMU7_HUMAN 60S ribosomal protein L7-like 1 OS=Homo sapiens GN=RPL7L1 PE=1 SV=1	2	6	6	6	0	0	0	0	5	4	0	0	0	0	5	4	0	0	0	0	5	4	22.4	22.4	22.4	28.661	246	246;196	0	45.414	0	0	0	0	18.3
sp|P46783|RS10_HUMAN;tr|F6U211|F6U211_HUMAN;tr|S4R435|S4R435_HUMAN;sp|Q9NQ39|RS10L_HUMAN	sp|P46783|RS10_HUMAN;tr|F6U211|F6U211_HUMAN;tr|S4R435|S4R435_HUMAN	20.6311	136570000	51548000	5916800	1	1	122070000	136570000	51548000	7;5;5;3	7;5;5;3	7;5;5;3	sp|P46783|RS10_HUMAN 40S ribosomal protein S10 OS=Homo sapiens GN=RPS10 PE=1 SV=1;tr|F6U211|F6U211_HUMAN 40S ribosomal protein S10 OS=Homo sapiens GN=RPS10 PE=4 SV=1;tr|S4R435|S4R435_HUMAN Protein RPS10-NUDT3 (Fragment) OS=Homo sapiens GN=RPS10-NUDT3 PE=3	4	7	7	7	2	1	1	4	6	5	2	1	1	4	6	5	2	1	1	4	6	5	40.6	40.6	40.6	18.898	165	165;172;286;176	0	94.002	14.5	5.5	5.5	20.6	34.5
sp|P47914|RL29_HUMAN	sp|P47914|RL29_HUMAN	34574000	48431000	51028000	1	1	1	34574000	48431000	51028000	2	2	2	sp|P47914|RL29_HUMAN 60S ribosomal protein L29 OS=Homo sapiens GN=RPL29 PE=1 SV=2	1	2	2	2	0	0	0	2	2	2	0	0	0	2	2	2	0	0	0	2	2	2	14.5	14.5	14.5	17.752	159	159	0	14.374	0	0	0	14.5	14.5
tr|A0A087WVC1|A0A087WVC1_HUMAN;sp|Q9BQ39|DDX50_HUMAN	tr|A0A087WVC1|A0A087WVC1_HUMAN;sp|Q9BQ39|DDX50_HUMAN	1	46096000	49620000	1	1	1	1	46096000	49620000	14;14	12;12	12;12	tr|A0A087WVC1|A0A087WVC1_HUMAN ATP-dependent RNA helicase DDX50 OS=Homo sapiens GN=DDX50 PE=1 SV=1;sp|Q9BQ39|DDX50_HUMAN ATP-dependent RNA helicase DDX50 OS=Homo sapiens GN=DDX50 PE=1 SV=1	2	14	12	12	0	0	0	2	11	9	0	0	0	0	10	8	0	0	0	0	10	8	22.5	18.8	18.8	82.226	730	730;737	0	88.106	0	0	0	3.7	18.2
sp|Q8TED0|UTP15_HUMAN;tr|H0Y8P4|H0Y8P4_HUMAN;tr|D6RF65|D6RF65_HUMAN	sp|Q8TED0|UTP15_HUMAN;tr|H0Y8P4|H0Y8P4_HUMAN	1	33782000	49358000	1	1	1	1	33782000	49358000	8;7;2	8;7;2	8;7;2	sp|Q8TED0|UTP15_HUMAN U3 small nucleolar RNA-associated protein 15 homolog OS=Homo sapiens GN=UTP15 PE=1 SV=3;tr|H0Y8P4|H0Y8P4_HUMAN U3 small nucleolar RNA-associated protein 15 homolog (Fragment) OS=Homo sapiens GN=UTP15 PE=1 SV=1	3	8	8	8	0	0	0	0	7	6	0	0	0	0	7	6	0	0	0	0	7	6	23.6	23.6	23.6	58.414	518	518;545;65	0	58.799	0	0	0	0	18.9
tr|H7BXY3|H7BXY3_HUMAN;sp|Q7L2E3|DHX30_HUMAN	tr|H7BXY3|H7BXY3_HUMAN;sp|Q7L2E3|DHX30_HUMAN	1	32694000	47404000	1	1	1	1	32694000	47404000	15;15	15;15	15;15	tr|H7BXY3|H7BXY3_HUMAN Putative ATP-dependent RNA helicase DHX30 OS=Homo sapiens GN=DHX30 PE=1 SV=1;sp|Q7L2E3|DHX30_HUMAN Putative ATP-dependent RNA helicase DHX30 OS=Homo sapiens GN=DHX30 PE=1 SV=1	2	15	15	15	0	0	0	0	11	12	0	0	0	0	11	12	0	0	0	0	11	12	16.7	16.7	16.7	130.55	1166	1166;1194	0	99.806	0	0	0	0	13
sp|Q9BVP2|GNL3_HUMAN;tr|C9JYH9|C9JYH9_HUMAN;tr|C9JZT7|C9JZT7_HUMAN;tr|B4DMU5|B4DMU5_HUMAN	sp|Q9BVP2|GNL3_HUMAN	1	45625000	47380000	1	1	1	1	45625000	47380000	9;2;2;2	9;2;2;2	9;2;2;2	sp|Q9BVP2|GNL3_HUMAN Guanine nucleotide-binding protein-like 3 OS=Homo sapiens GN=GNL3 PE=1 SV=2	4	9	9	9	0	0	0	0	9	5	0	0	0	0	9	5	0	0	0	0	9	5	25.1	25.1	25.1	61.992	549	549;96;135;395	0	98.184	0	0	0	0	25.1
sp|Q9NVP1|DDX18_HUMAN;tr|H7C452|H7C452_HUMAN	sp|Q9NVP1|DDX18_HUMAN	1	41784000	46932000	1	1	1	1	41784000	46932000	9;1	9;1	9;1	sp|Q9NVP1|DDX18_HUMAN ATP-dependent RNA helicase DDX18 OS=Homo sapiens GN=DDX18 PE=1 SV=2	2	9	9	9	0	0	0	0	8	7	0	0	0	0	8	7	0	0	0	0	8	7	16.6	16.6	16.6	75.406	670	670;214	0	71.248	0	0	0	0	14.9
sp|Q9H0D6|XRN2_HUMAN	sp|Q9H0D6|XRN2_HUMAN	1	48857000	45895000	1	1	1	1	48857000	45895000	13	13	13	sp|Q9H0D6|XRN2_HUMAN 5-3 exoribonuclease 2 OS=Homo sapiens GN=XRN2 PE=1 SV=1	1	13	13	13	0	0	0	1	10	10	0	0	0	1	10	10	0	0	0	1	10	10	14.2	14.2	14.2	108.58	950	950	0	113.78	0	0	0	1.8	12.2
sp|Q14690|RRP5_HUMAN;tr|S4R3Q4|S4R3Q4_HUMAN	sp|Q14690|RRP5_HUMAN	1	40705000	45340000	1	1	1	1	40705000	45340000	18;1	18;1	18;1	sp|Q14690|RRP5_HUMAN Protein RRP5 homolog OS=Homo sapiens GN=PDCD11 PE=1 SV=3	2	18	18	18	0	0	0	0	12	13	0	0	0	0	12	13	0	0	0	0	12	13	11.7	11.7	11.7	208.7	1871	1871;38	0	134.99	0	0	0	0	8.3
sp|Q13601|KRR1_HUMAN;tr|A0A087WZC7|A0A087WZC7_HUMAN	sp|Q13601|KRR1_HUMAN	1	42088000	44337000	1	1	1	1	42088000	44337000	11;4	6;4	6;4	sp|Q13601|KRR1_HUMAN KRR1 small subunit processome component homolog OS=Homo sapiens GN=KRR1 PE=1 SV=4	2	11	6	6	4	5	2	3	8	7	0	0	0	0	6	5	0	0	0	0	6	5	1.9	0.7	0.7	710.72	6623	6623;288	0	53.261	1.2	1.2	0.1	0.3	1.2
sp|Q14137|BOP1_HUMAN;tr|A0A075B729|A0A075B729_HUMAN	sp|Q14137|BOP1_HUMAN	1	41298000	44039000	1	1	1	1	41298000	44039000	8;2	8;2	8;2	sp|Q14137|BOP1_HUMAN Ribosome biogenesis protein BOP1 OS=Homo sapiens GN=BOP1 PE=1 SV=2	2	8	8	8	0	0	0	0	7	4	0	0	0	0	7	4	0	0	0	0	7	4	15.7	15.7	15.7	83.629	746	746;217	0	75.352	0	0	0	0	12.3
sp|Q9Y5S9|RBM8A_HUMAN;tr|H3BU74|H3BU74_HUMAN;tr|A0A087X0Z4|A0A087X0Z4_HUMAN;tr|B4DTX8|B4DTX8_HUMAN;tr|Q5T0C8|Q5T0C8_HUMAN;sp|Q6ZNA4|RN111_HUMAN;tr|A0A087WSX4|A0A087WSX4_HUMAN;tr|J3KNV1|J3KNV1_HUMAN	sp|Q9Y5S9|RBM8A_HUMAN;tr|H3BU74|H3BU74_HUMAN;tr|A0A087X0Z4|A0A087X0Z4_HUMAN	27954000	48376000	42153000	1	1	1	27954000	48376000	42153000	13;7;7;4;2;2;1;1	13;7;7;4;2;2;1;1	9;3;3;2;1;1;1;0	sp|Q9Y5S9|RBM8A_HUMAN RNA-binding protein 8A OS=Homo sapiens GN=RBM8A PE=1 SV=1;tr|H3BU74|H3BU74_HUMAN IQ domain-containing protein K (Fragment) OS=Homo sapiens GN=IQCK PE=4 SV=1;tr|A0A087X0Z4|A0A087X0Z4_HUMAN G-protein-coupled estrogen receptor 1 OS=Homo	8	13	13	9	1	1	0	7	7	9	1	1	0	7	7	9	1	1	0	5	4	7	6.4	6.4	4.1	279.28	2629	2629;552;880;326;218;1480;487;3070	0	124.27	0.7	0.4	0	3	4.1
sp|Q9NXF1|TEX10_HUMAN;tr|A0A0A0MSR3|A0A0A0MSR3_HUMAN	sp|Q9NXF1|TEX10_HUMAN	1	38727000	41769000	1	1	1	1	38727000	41769000	14;3	14;3	14;3	sp|Q9NXF1|TEX10_HUMAN Testis-expressed sequence 10 protein OS=Homo sapiens GN=TEX10 PE=1 SV=2	2	14	14	14	0	0	0	0	7	13	0	0	0	0	7	13	0	0	0	0	7	13	21.4	21.4	21.4	105.67	929	929;171	0	117.1	0	0	0	0	11
sp|P62314|SMD1_HUMAN;tr|J3QLI9|J3QLI9_HUMAN;tr|J3QLR7|J3QLR7_HUMAN	sp|P62314|SMD1_HUMAN;tr|J3QLI9|J3QLI9_HUMAN	1	27393000	41369000	1	1	1	1	27393000	41369000	3;2;1	3;2;1	3;2;1	sp|P62314|SMD1_HUMAN Small nuclear ribonucleoprotein Sm D1 OS=Homo sapiens GN=SNRPD1 PE=1 SV=1;tr|J3QLI9|J3QLI9_HUMAN Small nuclear ribonucleoprotein Sm D1 OS=Homo sapiens GN=SNRPD1 PE=1 SV=1	3	3	3	3	1	0	0	1	3	2	1	0	0	1	3	2	1	0	0	1	3	2	20.2	20.2	20.2	13.281	119	119;75;44	0	27.311	9.2	0	0	10.9	20.2
sp|P06748|NPM_HUMAN;tr|E5RI98|E5RI98_HUMAN;tr|E5RGW4|E5RGW4_HUMAN	sp|P06748|NPM_HUMAN	2.46678	71732000	37314000	9489300	1	1	23408000	71732000	37314000	8;3;1	8;3;1	8;3;1	sp|P06748|NPM_HUMAN Nucleophosmin OS=Homo sapiens GN=NPM1 PE=1 SV=2	3	8	8	8	2	1	0	2	7	5	2	1	0	2	7	5	2	1	0	2	7	5	33	33	33	32.575	294	294;111;59	0	115.63	10.2	7.1	0	4.8	30.6
sp|O00425|IF2B3_HUMAN;tr|F8WD15|F8WD15_HUMAN	sp|O00425|IF2B3_HUMAN	1	30894000	36227000	1	1	1	1	30894000	36227000	8;1	8;1	7;1	sp|O00425|IF2B3_HUMAN Insulin-like growth factor 2 mRNA-binding protein 3 OS=Homo sapiens GN=IGF2BP3 PE=1 SV=2	2	8	8	7	0	0	0	0	6	5	0	0	0	0	6	5	0	0	0	0	5	4	18.7	18.7	16.9	63.704	579	579;81	0	72.629	0	0	0	0	14.9
sp|P62829|RL23_HUMAN;tr|C9JD32|C9JD32_HUMAN;tr|J3KT29|J3KT29_HUMAN;tr|B9ZVP7|B9ZVP7_HUMAN;tr|J3KTJ3|J3KTJ3_HUMAN	sp|P62829|RL23_HUMAN;tr|C9JD32|C9JD32_HUMAN;tr|J3KT29|J3KT29_HUMAN;tr|B9ZVP7|B9ZVP7_HUMAN	1	40428000	36005000	1	1	1	1	40428000	36005000	5;4;4;3;2	5;4;4;3;2	4;3;3;3;1	sp|P62829|RL23_HUMAN 60S ribosomal protein L23 OS=Homo sapiens GN=RPL23 PE=1 SV=1;tr|C9JD32|C9JD32_HUMAN 60S ribosomal protein L23 (Fragment) OS=Homo sapiens GN=RPL23 PE=1 SV=1;tr|J3KT29|J3KT29_HUMAN 60S ribosomal protein L23 OS=Homo sapiens GN=RPL23 PE=1	5	5	5	4	0	0	0	0	4	3	0	0	0	0	4	3	0	0	0	0	3	3	32.1	32.1	25.7	14.865	140	140;91;122;114;81	0	45.284	0	0	0	0	25
sp|O75533|SF3B1_HUMAN;tr|H7C341|H7C341_HUMAN	sp|O75533|SF3B1_HUMAN	0.840775	3.48858	35221000	5849600	7424800	1	4918200	25902000	35221000	17;3	17;3	17;3	sp|O75533|SF3B1_HUMAN Splicing factor 3B subunit 1 OS=Homo sapiens GN=SF3B1 PE=1 SV=3	2	17	17	17	4	2	1	5	12	11	4	2	1	5	12	11	4	2	1	5	12	11	15.9	15.9	15.9	145.83	1304	1304;241	0	127.26	3.8	2.1	1.4	5	12.8
sp|Q13242|SRSF9_HUMAN;tr|H0YIB4|H0YIB4_HUMAN;tr|S4R3G0|S4R3G0_HUMAN	sp|Q13242|SRSF9_HUMAN;tr|H0YIB4|H0YIB4_HUMAN;tr|S4R3G0|S4R3G0_HUMAN	1	43593000	35042000	1	1	1	1	43593000	35042000	9;7;6	9;7;6	8;7;5	sp|Q13242|SRSF9_HUMAN Serine/arginine-rich splicing factor 9 OS=Homo sapiens GN=SRSF9 PE=1 SV=1;tr|H0YIB4|H0YIB4_HUMAN Serine/arginine-rich-splicing factor 9 (Fragment) OS=Homo sapiens GN=SRSF9 PE=1 SV=5;tr|S4R3G0|S4R3G0_HUMAN Serine/arginine-rich-splicing	3	9	9	8	1	0	0	2	6	7	1	0	0	2	6	7	1	0	0	2	5	6	36.7	36.7	33.5	25.542	221	221;110;119	0	60.585	5	0	0	9.5	27.6
sp|O15226|NKRF_HUMAN;tr|A0A087WXT2|A0A087WXT2_HUMAN	sp|O15226|NKRF_HUMAN	1	35335000	34771000	1	1	1	1	35335000	34771000	15;6	15;6	15;6	sp|O15226|NKRF_HUMAN NF-kappa-B-repressing factor OS=Homo sapiens GN=NKRF PE=1 SV=2	2	15	15	15	0	0	0	1	15	7	0	0	0	1	15	7	0	0	0	1	15	7	21.3	21.3	21.3	77.672	690	690;387	0	104.38	0	0	0	1.3	21.3
sp|P19338|NUCL_HUMAN;tr|H7BY16|H7BY16_HUMAN	sp|P19338|NUCL_HUMAN;tr|H7BY16|H7BY16_HUMAN	1	62105000	34714000	1	1	1	1	62105000	34714000	13;7	13;7	13;7	sp|P19338|NUCL_HUMAN Nucleolin OS=Homo sapiens GN=NCL PE=1 SV=3;tr|H7BY16|H7BY16_HUMAN Nucleolin (Fragment) OS=Homo sapiens GN=NCL PE=1 SV=5	2	13	13	13	0	0	0	1	12	7	0	0	0	1	12	7	0	0	0	1	12	7	21.4	21.4	21.4	76.613	710	710;297	0	100.79	0	0	0	2	18.5
tr|A0A087WZZ5|A0A087WZZ5_HUMAN;sp|Q13435|SF3B2_HUMAN;tr|E9PPJ0|E9PPJ0_HUMAN;tr|E9PJT3|E9PJT3_HUMAN;tr|E9PJ04|E9PJ04_HUMAN;tr|H0YCG1|H0YCG1_HUMAN;tr|E9PIL8|E9PIL8_HUMAN;tr|H0YEX5|H0YEX5_HUMAN	tr|A0A087WZZ5|A0A087WZZ5_HUMAN;sp|Q13435|SF3B2_HUMAN;tr|E9PPJ0|E9PPJ0_HUMAN	2.23028	27411000	34290000	6409500	1	1	14295000	27411000	34290000	13;13;12;6;6;6;3;3	13;13;12;6;6;6;3;3	13;13;12;6;6;6;3;3	tr|A0A087WZZ5|A0A087WZZ5_HUMAN Splicing factor 3B subunit 2 OS=Homo sapiens GN=SF3B2 PE=1 SV=1;sp|Q13435|SF3B2_HUMAN Splicing factor 3B subunit 2 OS=Homo sapiens GN=SF3B2 PE=1 SV=2;tr|E9PPJ0|E9PPJ0_HUMAN Splicing factor 3B subunit 2 OS=Homo sapiens GN=SF3B	8	13	13	13	4	1	1	4	8	10	4	1	1	4	8	10	4	1	1	4	8	10	18.1	18.1	18.1	97.584	871	871;895;878;273;354;387;81;315	0	104.06	5.3	2.1	2.1	6	13.8
tr|G3XAC6|G3XAC6_HUMAN;sp|Q14498|RBM39_HUMAN;tr|H0Y4X3|H0Y4X3_HUMAN;tr|Q5QP23|Q5QP23_HUMAN;tr|Q5QP22|Q5QP22_HUMAN;tr|H0YJJ3|H0YJJ3_HUMAN;tr|G3V5Z6|G3V5Z6_HUMAN;tr|G3XAP0|G3XAP0_HUMAN	tr|G3XAC6|G3XAC6_HUMAN;sp|Q14498|RBM39_HUMAN;tr|H0Y4X3|H0Y4X3_HUMAN	16547000	7.48921	34103000	1	6299600	1	16547000	47179000	34103000	7;7;6;2;1;1;1;1	7;7;6;2;1;1;1;1	6;6;5;2;1;0;0;0	tr|G3XAC6|G3XAC6_HUMAN RNA-binding protein 39 OS=Homo sapiens GN=RBM39 PE=1 SV=1;sp|Q14498|RBM39_HUMAN RNA-binding protein 39 OS=Homo sapiens GN=RBM39 PE=1 SV=2;tr|H0Y4X3|H0Y4X3_HUMAN RNA-binding protein 39 (Fragment) OS=Homo sapiens GN=RBM39 PE=1 SV=5	8	7	7	6	1	2	0	3	5	6	1	2	0	3	5	6	1	2	0	3	4	6	19.1	19.1	19.1	48.023	423	423;530;337;231;193;214;754;1072	0	65.898	2.6	6.1	0	10.2	16.5
tr|Q5JP53|Q5JP53_HUMAN;sp|P07437|TBB5_HUMAN;tr|Q5ST81|Q5ST81_HUMAN;sp|Q9BVA1|TBB2B_HUMAN;sp|Q13885|TBB2A_HUMAN;tr|A0A0B4J269|A0A0B4J269_HUMAN;sp|Q13509|TBB3_HUMAN;sp|Q9BUF5|TBB6_HUMAN;tr|K7ESM5|K7ESM5_HUMAN;tr|A0A075B736|A0A075B736_HUMAN;tr|Q5SQY0|Q5SQY0_HUMAN;tr|I3L2F9|I3L2F9_HUMAN;sp|A6NNZ2|TBB8L_HUMAN;CON__ENSEMBL:ENSBTAP00000025008;sp|Q9H4B7|TBB1_HUMAN;tr|F6U341|F6U341_HUMAN;tr|G3V5W4|G3V5W4_…	tr|Q5JP53|Q5JP53_HUMAN;sp|P07437|TBB5_HUMAN;tr|Q5ST81|Q5ST81_HUMAN;sp|Q9BVA1|TBB2B_HUMAN;sp|Q13885|TBB2A_HUMAN	0.558046	8.43271	33832000	8410600	6164800	1	4693500	51986000	33832000	13;13;11;8;8;6;6;4;4;4;4;4;4;3;3;1;1;1;1;1;1;1;1	13;13;11;8;8;6;6;4;4;4;4;4;4;3;3;1;1;1;1;1;1;1;1	4;4;2;1;1;1;1;0;0;0;0;0;0;0;0;1;1;0;1;0;0;0;1	tr|Q5JP53|Q5JP53_HUMAN Tubulin beta chain OS=Homo sapiens GN=TUBB PE=1 SV=1;sp|P07437|TBB5_HUMAN Tubulin beta chain OS=Homo sapiens GN=TUBB PE=1 SV=2;tr|Q5ST81|Q5ST81_HUMAN Tubulin beta chain OS=Homo sapiens GN=TUBB PE=1 SV=1;sp|Q9BVA1|TBB2B_HUMAN Tubulin	23	13	13	4	4	3	1	2	11	11	4	3	1	2	11	11	1	1	1	1	4	2	35	35	13.8	47.766	426	426;444;372;445;445;797;450;446;338;407;410;410;444;536;451;488;97;144;377;189;161;155;911	0	126.8	11	9.2	3.5	5.9	29.8
tr|F5H5D3|F5H5D3_HUMAN;sp|P68363|TBA1B_HUMAN;sp|Q9BQE3|TBA1C_HUMAN;sp|Q71U36|TBA1A_HUMAN;sp|Q13748|TBA3C_HUMAN;sp|Q6PEY2|TBA3E_HUMAN;tr|F8VVB9|F8VVB9_HUMAN;sp|P68366|TBA4A_HUMAN;tr|C9J2C0|C9J2C0_HUMAN;sp|Q9NY65|TBA8_HUMAN;tr|F8VQQ4|F8VQQ4_HUMAN;tr|F8VWV9|F8VWV9_HUMAN;tr|F8VS66|F8VS66_HUMAN;tr|F8VX09|F8VX09_HUMAN;tr|F8VRZ4|F8VRZ4_HUMAN;tr|F8VRK0|F8VRK0_HUMAN;tr|C9K0S6|C9K0S6_HUMAN;tr|V9GZ17|V9GZ17…	tr|F5H5D3|F5H5D3_HUMAN;sp|P68363|TBA1B_HUMAN;sp|Q9BQE3|TBA1C_HUMAN;sp|Q71U36|TBA1A_HUMAN;sp|Q13748|TBA3C_HUMAN;sp|Q6PEY2|TBA3E_HUMAN;tr|F8VVB9|F8VVB9_HUMAN;sp|P68366|TBA4A_HUMAN;tr|C9J2C0|C9J2C0_HUMAN;sp|Q9NY65|TBA8_HUMAN;tr|F8VQQ4|F8VQQ4_HUMAN	0.693222	1.20667	33720000	16996000	24034000	1	11782000	29001000	33720000	9;9;9;9;8;6;6;6;5;5;5;4;4;4;4;2;2;2;2;2;2;2;2;1;1;1	9;9;9;9;8;6;6;6;5;5;5;4;4;4;4;2;2;2;2;2;2;2;2;1;1;1	9;9;9;9;8;6;6;6;5;5;5;4;4;4;4;2;2;2;2;2;2;2;2;1;1;1	tr|F5H5D3|F5H5D3_HUMAN Tubulin alpha-1C chain OS=Homo sapiens GN=TUBA1C PE=1 SV=1;sp|P68363|TBA1B_HUMAN Tubulin alpha-1B chain OS=Homo sapiens GN=TUBA1B PE=1 SV=1;sp|Q9BQE3|TBA1C_HUMAN Tubulin alpha-1C chain OS=Homo sapiens GN=TUBA1C PE=1 SV=1;sp|Q71U36|TB	26	9	9	9	6	3	1	6	5	6	6	3	1	6	5	6	6	3	1	6	5	6	17	17	17	80.247	737	737;451;449;451;450;450;247;448;467;449;219;81;130;75;112;49;47;275;180;156;153;120;198;26;446;231	0	68.271	11.1	6.4	2	11.8	9.5
sp|P07477|TRY1_HUMAN;CON__P07477;tr|E7EQ64|E7EQ64_HUMAN;tr|H0Y8D1|H0Y8D1_HUMAN;tr|A0A087WW55|A0A087WW55_HUMAN;sp|Q8NHM4|TRY6_HUMAN;sp|P07478|TRY2_HUMAN	sp|P07477|TRY1_HUMAN;CON__P07477;tr|E7EQ64|E7EQ64_HUMAN;tr|H0Y8D1|H0Y8D1_HUMAN;tr|A0A087WW55|A0A087WW55_HUMAN;sp|Q8NHM4|TRY6_HUMAN;sp|P07478|TRY2_HUMAN	1	1	33379000	1	1	1	1	1	33379000	2;2;2;1;1;1;1	1;1;1;1;1;1;1	1;1;1;1;1;1;1	sp|P07477|TRY1_HUMAN Trypsin-1 OS=Homo sapiens GN=PRSS1 PE=1 SV=1;;tr|E7EQ64|E7EQ64_HUMAN Trypsin-1 OS=Homo sapiens GN=PRSS1 PE=1 SV=1;tr|H0Y8D1|H0Y8D1_HUMAN Trypsin-1 (Fragment) OS=Homo sapiens GN=PRSS1 PE=1 SV=1;tr|A0A087WW55|A0A087WW55_HUMAN Trypsin-1 O	7	2	1	1	0	0	2	1	1	1	0	0	1	1	1	1	0	0	1	1	1	1	11.3	8.1	8.1	26.558	247	247;247;261;142;247;247;247	0	16.78	0	0	11.3	8.1	8.1
sp|Q14684|RRP1B_HUMAN	sp|Q14684|RRP1B_HUMAN	1	36867000	33187000	1	1	1	1	36867000	33187000	10	10	10	sp|Q14684|RRP1B_HUMAN Ribosomal RNA processing protein 1 homolog B OS=Homo sapiens GN=RRP1B PE=1 SV=3	1	10	10	10	0	0	0	0	8	8	0	0	0	0	8	8	0	0	0	0	8	8	18.5	18.5	18.5	84.427	758	758	0	75.155	0	0	0	0	15.4
tr|B7Z6D5|B7Z6D5_HUMAN;sp|Q96GQ7|DDX27_HUMAN;tr|A0A087X059|A0A087X059_HUMAN;tr|A0A087WYH5|A0A087WYH5_HUMAN	tr|B7Z6D5|B7Z6D5_HUMAN;sp|Q96GQ7|DDX27_HUMAN	1	31911000	32872000	1	1	1	1	31911000	32872000	10;10;3;1	10;10;3;1	10;10;3;1	tr|B7Z6D5|B7Z6D5_HUMAN Probable ATP-dependent RNA helicase DDX27 OS=Homo sapiens GN=DDX27 PE=1 SV=1;sp|Q96GQ7|DDX27_HUMAN Probable ATP-dependent RNA helicase DDX27 OS=Homo sapiens GN=DDX27 PE=1 SV=2	4	10	10	10	0	0	0	0	10	8	0	0	0	0	10	8	0	0	0	0	10	8	13.7	13.7	13.7	86.604	765	765;796;275;169	0	71.168	0	0	0	0	13.7
sp|Q99459|CDC5L_HUMAN	sp|Q99459|CDC5L_HUMAN	1	42034000	32085000	1	1	1	1	42034000	32085000	13	13	13	sp|Q99459|CDC5L_HUMAN Cell division cycle 5-like protein OS=Homo sapiens GN=CDC5L PE=1 SV=2	1	13	13	13	1	0	1	2	13	9	1	0	1	2	13	9	1	0	1	2	13	9	22.3	22.3	22.3	92.25	802	802	0	95.418	1	0	1.2	2.7	22.3
sp|P62316|SMD2_HUMAN;tr|K7ERG4|K7ERG4_HUMAN;tr|K7EJB5|K7EJB5_HUMAN	sp|P62316|SMD2_HUMAN;tr|K7ERG4|K7ERG4_HUMAN	3.51814	1.87345	31334000	10999000	19778000	1	38696000	37053000	31334000	6;4;1	6;4;1	6;4;1	sp|P62316|SMD2_HUMAN Small nuclear ribonucleoprotein Sm D2 OS=Homo sapiens GN=SNRPD2 PE=1 SV=1;tr|K7ERG4|K7ERG4_HUMAN Small nuclear ribonucleoprotein Sm D2 OS=Homo sapiens GN=SNRPD2 PE=1 SV=1	3	6	6	6	4	2	0	4	3	4	4	2	0	4	3	4	4	2	0	4	3	4	44.1	44.1	44.1	13.527	118	118;78;257	0	39.722	35.6	23.7	0	38.1	32.2
sp|O75367|H2AY_HUMAN;tr|B4DJC3|B4DJC3_HUMAN;tr|D6RCF2|D6RCF2_HUMAN	sp|O75367|H2AY_HUMAN;tr|B4DJC3|B4DJC3_HUMAN	1	25719000	31244000	1	1	1	1	25719000	31244000	6;4;2	5;3;1	5;3;1	sp|O75367|H2AY_HUMAN Core histone macro-H2A.1 OS=Homo sapiens GN=H2AFY PE=1 SV=4;tr|B4DJC3|B4DJC3_HUMAN Histone H2A OS=Homo sapiens GN=H2AFY PE=1 SV=1	3	6	5	5	0	0	0	0	4	5	0	0	0	0	4	4	0	0	0	0	4	4	26.1	23.7	23.7	39.617	372	372;200;165	0	34.565	0	0	0	0	18.3
sp|Q01780|EXOSX_HUMAN;tr|K7EJ37|K7EJ37_HUMAN	sp|Q01780|EXOSX_HUMAN	1	21046000	31035000	1	1	1	1	21046000	31035000	14;2	14;2	14;2	sp|Q01780|EXOSX_HUMAN Exosome component 10 OS=Homo sapiens GN=EXOSC10 PE=1 SV=2	2	14	14	14	0	0	0	0	9	12	0	0	0	0	9	12	0	0	0	0	9	12	22	22	22	100.83	885	885;124	0	99.774	0	0	0	0	15
sp|P08621|RU17_HUMAN;tr|M0QYR1|M0QYR1_HUMAN	sp|P08621|RU17_HUMAN	1.5848	3.06369	30880000	13738000	13582000	1	21772000	41611000	30880000	9;4	9;4	9;4	sp|P08621|RU17_HUMAN U1 small nuclear ribonucleoprotein 70 kDa OS=Homo sapiens GN=SNRNP70 PE=1 SV=2	2	9	9	9	6	3	2	5	7	7	6	3	2	5	7	7	6	3	2	5	7	7	26.1	26.1	26.1	51.556	437	437;94	0	59.744	11.2	7.3	4.8	9.4	24.3
tr|A0A0D9SG12|A0A0D9SG12_HUMAN;tr|A0A0D9SFB3|A0A0D9SFB3_HUMAN;sp|O00571|DDX3X_HUMAN;tr|A0A0D9SF53|A0A0D9SF53_HUMAN;sp|O15523|DDX3Y_HUMAN;sp|O95232|LC7L3_HUMAN;tr|A0A087WVZ1|A0A087WVZ1_HUMAN;tr|D6RHH0|D6RHH0_HUMAN;tr|U3KQT3|U3KQT3_HUMAN;tr|D6RDI2|D6RDI2_HUMAN;tr|C9J8G5|C9J8G5_HUMAN;tr|C9J081|C9J081_HUMAN;tr|D6RCM4|D6RCM4_HUMAN;sp|Q9NQI0|DDX4_HUMAN	tr|A0A0D9SG12|A0A0D9SG12_HUMAN;tr|A0A0D9SFB3|A0A0D9SFB3_HUMAN;sp|O00571|DDX3X_HUMAN;tr|A0A0D9SF53|A0A0D9SF53_HUMAN;sp|O15523|DDX3Y_HUMAN	1.17524	35047000	30424000	12537000	1	1	14734000	35047000	30424000	16;13;13;13;10;3;2;1;1;1;1;1;1;1	15;12;12;12;9;3;2;1;1;1;1;1;1;1	15;12;12;12;9;3;2;1;1;1;1;1;1;1	tr|A0A0D9SG12|A0A0D9SG12_HUMAN ATP-dependent RNA helicase DDX3X OS=Homo sapiens GN=DDX3X PE=1 SV=1;tr|A0A0D9SFB3|A0A0D9SFB3_HUMAN ATP-dependent RNA helicase DDX3X OS=Homo sapiens GN=DDX3X PE=1 SV=1;sp|O00571|DDX3X_HUMAN ATP-dependent RNA helicase DDX3X OS=	14	16	15	15	6	1	1	5	10	11	5	1	1	4	9	10	5	1	1	4	9	10	10.6	9.9	9.9	171.89	1553	1553;640;662;733;660;432;138;36;47;184;224;250;518;724	0	98.687	4.3	0.8	0.8	3.6	6.1
sp|Q13247|SRSF6_HUMAN	sp|Q13247|SRSF6_HUMAN	1	21540000	30388000	1	1	1	1	21540000	30388000	6	6	5	sp|Q13247|SRSF6_HUMAN Serine/arginine-rich splicing factor 6 OS=Homo sapiens GN=SRSF6 PE=1 SV=2	1	6	6	5	1	0	0	2	4	3	1	0	0	2	4	3	0	0	0	1	3	2	16.6	16.6	14	39.586	344	344	0	36.635	2.6	0	0	5.2	10.5
sp|Q9HCE1|MOV10_HUMAN;tr|H0Y6A5|H0Y6A5_HUMAN	sp|Q9HCE1|MOV10_HUMAN;tr|H0Y6A5|H0Y6A5_HUMAN	1	27011000	29973000	1	1	1	1	27011000	29973000	16;16	16;16	16;16	sp|Q9HCE1|MOV10_HUMAN Putative helicase MOV-10 OS=Homo sapiens GN=MOV10 PE=1 SV=2;tr|H0Y6A5|H0Y6A5_HUMAN Palmitoyltransferase (Fragment) OS=Homo sapiens GN=ZDHHC3 PE=1 SV=1	2	16	16	16	0	0	0	0	12	12	0	0	0	0	12	12	0	0	0	0	12	12	20	20	20	113.67	1003	1003;1253	0	121.98	0	0	0	0	15.5
sp|P62304|RUXE_HUMAN	sp|P62304|RUXE_HUMAN	1	1	29897000	1	1	1	1	1	29897000	1	1	1	sp|P62304|RUXE_HUMAN Small nuclear ribonucleoprotein E OS=Homo sapiens GN=SNRPE PE=1 SV=1	1	1	1	1	0	0	1	1	1	1	0	0	1	1	1	1	0	0	1	1	1	1	12	12	12	10.803	92	92	0	14.004	0	0	12	12	12
tr|D6RAN4|D6RAN4_HUMAN;sp|P32969|RL9_HUMAN;tr|H0Y9V9|H0Y9V9_HUMAN;tr|H0Y9R4|H0Y9R4_HUMAN;tr|E7ESE0|E7ESE0_HUMAN	tr|D6RAN4|D6RAN4_HUMAN;sp|P32969|RL9_HUMAN;tr|H0Y9V9|H0Y9V9_HUMAN;tr|H0Y9R4|H0Y9R4_HUMAN;tr|E7ESE0|E7ESE0_HUMAN	1	35065000	29337000	1	1	1	1	35065000	29337000	4;4;3;2;2	4;4;3;2;2	4;4;3;2;2	tr|D6RAN4|D6RAN4_HUMAN 60S ribosomal protein L9 (Fragment) OS=Homo sapiens GN=RPL9 PE=1 SV=5;sp|P32969|RL9_HUMAN 60S ribosomal protein L9 OS=Homo sapiens GN=RPL9 PE=1 SV=1;tr|H0Y9V9|H0Y9V9_HUMAN 60S ribosomal protein L9 (Fragment) OS=Homo sapiens GN=RPL9 P	5	4	4	4	0	0	0	0	4	2	0	0	0	0	4	2	0	0	0	0	4	2	20.3	20.3	20.3	20.874	182	182;192;189;91;166	0	25.036	0	0	0	0	20.3
sp|Q12906|ILF3_HUMAN;tr|K7EQR9|K7EQR9_HUMAN;tr|K7EKJ9|K7EKJ9_HUMAN;tr|K7ERM6|K7ERM6_HUMAN;tr|K7ENK6|K7ENK6_HUMAN;tr|K7EM82|K7EM82_HUMAN;tr|K7EJ09|K7EJ09_HUMAN;tr|K7ER69|K7ER69_HUMAN;tr|K7EQ75|K7EQ75_HUMAN;sp|Q96SI9|STRBP_HUMAN	sp|Q12906|ILF3_HUMAN	5059500	26626000	28473000	1	1	1	5059500	26626000	28473000	12;3;3;1;1;1;1;1;1;1	12;3;3;1;1;1;1;1;1;1	12;3;3;1;1;1;1;1;1;1	sp|Q12906|ILF3_HUMAN Interleukin enhancer-binding factor 3 OS=Homo sapiens GN=ILF3 PE=1 SV=3	10	12	12	12	1	0	0	2	9	9	1	0	0	2	9	9	1	0	0	2	9	9	16.2	16.2	16.2	95.337	894	894;180;254;78;79;99;122;161;321;672	0	79.125	1.3	0	0	2.5	12.2
sp|Q8IWL1|SFPA2_HUMAN;tr|H0YM97|H0YM97_HUMAN	sp|Q8IWL1|SFPA2_HUMAN	0.990405	28595000	27923000	17926000	1	1	17754000	28595000	27923000	10;1	9;1	9;1	sp|Q8IWL1|SFPA2_HUMAN Pulmonary surfactant-associated protein A2 OS=Homo sapiens GN=SFTPA2 PE=1 SV=1	2	10	9	9	4	0	0	6	10	8	4	0	0	5	9	7	4	0	0	5	9	7	3.1	2.9	2.9	391.86	3688	3688;381	0	67.732	1.4	0	0	2.3	3.1
sp|Q9BVJ6|UT14A_HUMAN;sp|Q5TAP6|UT14C_HUMAN;tr|X6RJY0|X6RJY0_HUMAN	sp|Q9BVJ6|UT14A_HUMAN	1	27954000	27889000	1	1	1	1	27954000	27889000	10;2;2	10;2;2	10;2;2	sp|Q9BVJ6|UT14A_HUMAN U3 small nucleolar RNA-associated protein 14 homolog A OS=Homo sapiens GN=UTP14A PE=1 SV=1	3	10	10	10	0	0	0	0	10	8	0	0	0	0	10	8	0	0	0	0	10	8	19.8	19.8	19.8	87.977	771	771;766;1310	0	77.905	0	0	0	0	19.8
sp|P55265|DSRAD_HUMAN;tr|H0YCK3|H0YCK3_HUMAN	sp|P55265|DSRAD_HUMAN;tr|H0YCK3|H0YCK3_HUMAN	1	19423000	27739000	1	1	1	1	19423000	27739000	11;10	11;10	11;10	sp|P55265|DSRAD_HUMAN Double-stranded RNA-specific adenosine deaminase OS=Homo sapiens GN=ADAR PE=1 SV=4;tr|H0YCK3|H0YCK3_HUMAN Double-stranded RNA-specific adenosine deaminase (Fragment) OS=Homo sapiens GN=ADAR PE=1 SV=1	2	11	11	11	0	0	0	0	8	10	0	0	0	0	8	10	0	0	0	0	8	10	13.1	13.1	13.1	136.06	1226	1226;1195	0	80.023	0	0	0	0	10.1
sp|O60832|DKC1_HUMAN;tr|C9IYT0|C9IYT0_HUMAN;tr|H7C0M1|H7C0M1_HUMAN;tr|H7BZF2|H7BZF2_HUMAN;tr|H7C2Q9|H7C2Q9_HUMAN	sp|O60832|DKC1_HUMAN;tr|C9IYT0|C9IYT0_HUMAN;tr|H7C0M1|H7C0M1_HUMAN	1	22889000	27353000	1	1	1	1	22889000	27353000	7;5;4;2;1	7;5;4;2;1	7;5;4;2;1	sp|O60832|DKC1_HUMAN H/ACA ribonucleoprotein complex subunit 4 OS=Homo sapiens GN=DKC1 PE=1 SV=3;tr|C9IYT0|C9IYT0_HUMAN H/ACA ribonucleoprotein complex subunit 4 (Fragment) OS=Homo sapiens GN=DKC1 PE=1 SV=5;tr|H7C0M1|H7C0M1_HUMAN H/ACA ribonucleoprotein co	5	7	7	7	0	0	0	0	4	7	0	0	0	0	4	7	0	0	0	0	4	7	15.4	15.4	15.4	57.673	514	514;259;229;76;169	0	87.052	0	0	0	0	10.5
sp|P26599|PTBP1_HUMAN;tr|G5EA29|G5EA29_HUMAN;tr|K7EKJ7|K7EKJ7_HUMAN;tr|K7EK45|K7EK45_HUMAN;tr|U3KQ54|U3KQ54_HUMAN;tr|A0A087WUW5|A0A087WUW5_HUMAN;tr|K7ELW5|K7ELW5_HUMAN;tr|K7ES59|K7ES59_HUMAN;tr|X6R242|X6R242_HUMAN;tr|A0A087WU68|A0A087WU68_HUMAN;sp|O95758|PTBP3_HUMAN	sp|P26599|PTBP1_HUMAN;tr|G5EA29|G5EA29_HUMAN;tr|K7EKJ7|K7EKJ7_HUMAN	1	34771000	27150000	1	1	1	1	34771000	27150000	9;7;5;3;3;2;2;2;1;1;1	9;7;5;3;3;2;2;2;1;1;1	9;7;5;3;3;2;2;2;1;1;1	sp|P26599|PTBP1_HUMAN Polypyrimidine tract-binding protein 1 OS=Homo sapiens GN=PTBP1 PE=1 SV=1;tr|G5EA29|G5EA29_HUMAN Gem-associated protein 2 OS=Homo sapiens GN=GEMIN2 PE=1 SV=1;tr|K7EKJ7|K7EKJ7_HUMAN Polypyrimidine tract-binding protein 1 (Fragment) OS=	11	9	9	9	0	0	0	1	6	4	0	0	0	1	6	4	0	0	0	1	6	4	19.8	19.8	19.8	57.221	531	531;778;238;256;518;82;105;289;183;227;552	0	148.66	0	0	0	1.5	16.4
sp|Q15397|K0020_HUMAN;tr|S4R3K8|S4R3K8_HUMAN	sp|Q15397|K0020_HUMAN	1	27445000	26692000	1	1	1	1	27445000	26692000	12;1	12;1	12;1	sp|Q15397|K0020_HUMAN Pumilio domain-containing protein KIAA0020 OS=Homo sapiens GN=KIAA0020 PE=1 SV=3	2	12	12	12	0	0	0	0	8	8	0	0	0	0	8	8	0	0	0	0	8	8	18.4	18.4	18.4	73.584	648	648;498	0	80.931	0	0	0	0	13
tr|M0R3F6|M0R3F6_HUMAN;sp|Q8IX01|SUGP2_HUMAN;tr|M0R2Z9|M0R2Z9_HUMAN;tr|M0R065|M0R065_HUMAN;tr|M0R216|M0R216_HUMAN	tr|M0R3F6|M0R3F6_HUMAN;sp|Q8IX01|SUGP2_HUMAN;tr|M0R2Z9|M0R2Z9_HUMAN	1	18747000	26491000	1	1	1	1	18747000	26491000	6;6;6;2;1	6;6;6;2;1	6;6;6;2;1	tr|M0R3F6|M0R3F6_HUMAN SURP and G-patch domain-containing protein 2 OS=Homo sapiens GN=SUGP2 PE=1 SV=1;sp|Q8IX01|SUGP2_HUMAN SURP and G-patch domain-containing protein 2 OS=Homo sapiens GN=SUGP2 PE=1 SV=2;tr|M0R2Z9|M0R2Z9_HUMAN SURP and G-patch domain-cont	5	6	6	6	0	0	0	1	5	5	0	0	0	1	5	5	0	0	0	1	5	5	10.5	10.5	10.5	93.859	841	841;1082;1096;111;170	0	48.434	0	0	0	1.7	9.2
sp|P56537|IF6_HUMAN;tr|B7ZBH1|B7ZBH1_HUMAN	sp|P56537|IF6_HUMAN;tr|B7ZBH1|B7ZBH1_HUMAN	1	43503000	26373000	1	1	1	1	43503000	26373000	4;2	4;2	4;2	sp|P56537|IF6_HUMAN Eukaryotic translation initiation factor 6 OS=Homo sapiens GN=EIF6 PE=1 SV=1;tr|B7ZBH1|B7ZBH1_HUMAN Eukaryotic translation initiation factor 6 (Fragment) OS=Homo sapiens GN=EIF6 PE=1 SV=1	2	4	4	4	0	0	0	1	3	3	0	0	0	1	3	3	0	0	0	1	3	3	26.9	26.9	26.9	26.599	245	245;108	0	81.663	0	0	0	4.1	22.9
sp|P62263|RS14_HUMAN;tr|H0YB22|H0YB22_HUMAN;tr|E5RH77|E5RH77_HUMAN	sp|P62263|RS14_HUMAN;tr|H0YB22|H0YB22_HUMAN;tr|E5RH77|E5RH77_HUMAN	1	37505000	26161000	1	1	1	1	37505000	26161000	6;5;5	6;5;5	6;5;5	sp|P62263|RS14_HUMAN 40S ribosomal protein S14 OS=Homo sapiens GN=RPS14 PE=1 SV=3;tr|H0YB22|H0YB22_HUMAN 40S ribosomal protein S14 (Fragment) OS=Homo sapiens GN=RPS14 PE=1 SV=1;tr|E5RH77|E5RH77_HUMAN 40S ribosomal protein S14 OS=Homo sapiens GN=RPS14 PE=1	3	6	6	6	0	0	0	0	6	5	0	0	0	0	6	5	0	0	0	0	6	5	38.4	38.4	38.4	16.273	151	151;120;134	0	53.488	0	0	0	0	38.4
sp|Q9UKM9|RALY_HUMAN;tr|Q5QPL9|Q5QPL9_HUMAN;tr|Q5QPM1|Q5QPM1_HUMAN;tr|Q5QPM2|Q5QPM2_HUMAN;tr|Q5QPM0|Q5QPM0_HUMAN	sp|Q9UKM9|RALY_HUMAN;tr|Q5QPL9|Q5QPL9_HUMAN;tr|Q5QPM1|Q5QPM1_HUMAN	4.48418	15973000	25856000	4560700	1	1	20451000	15973000	25856000	7;6;4;3;3	7;6;4;3;3	7;6;4;3;3	sp|Q9UKM9|RALY_HUMAN RNA-binding protein Raly OS=Homo sapiens GN=RALY PE=1 SV=1;tr|Q5QPL9|Q5QPL9_HUMAN RNA-binding protein Raly (Fragment) OS=Homo sapiens GN=RALY PE=1 SV=1;tr|Q5QPM1|Q5QPM1_HUMAN RNA-binding protein Raly (Fragment) OS=Homo sapiens GN=RALY	5	7	7	7	2	0	1	4	3	6	2	0	1	4	3	6	2	0	1	4	3	6	40.2	40.2	40.2	32.463	306	306;237;181;89;172	0	45.025	7.5	0	3.9	13.4	27.1
REV__sp|O15440|MRP5_HUMAN	REV__sp|O15440|MRP5_HUMAN	1	1	25566000	1	1	1	1	1	25566000	1	1	1	sp|O15440|MRP5_HUMAN Multidrug resistance-associated protein 5 OS=Homo sapiens GN=ABCC5 PE=1 SV=2	1	1	1	1	1	1	0	0	0	1	1	1	0	0	0	1	1	1	0	0	0	1	0	0	0	160.66	1437	1437	0.0095368	6.2652	0	0	0	0	0
sp|Q9Y3B9|RRP15_HUMAN	sp|Q9Y3B9|RRP15_HUMAN	1	15725000	25087000	1	1	1	1	15725000	25087000	3	3	3	sp|Q9Y3B9|RRP15_HUMAN RRP15-like protein OS=Homo sapiens GN=RRP15 PE=1 SV=2	1	3	3	3	0	0	0	0	3	2	0	0	0	0	3	2	0	0	0	0	3	2	11.7	11.7	11.7	31.484	282	282	0	21.832	0	0	0	0	11.7
sp|Q9BQ67|GRWD1_HUMAN;tr|M0QX71|M0QX71_HUMAN	sp|Q9BQ67|GRWD1_HUMAN;tr|M0QX71|M0QX71_HUMAN	1	37281000	24791000	1	1	1	1	37281000	24791000	5;3	5;3	5;3	sp|Q9BQ67|GRWD1_HUMAN Glutamate-rich WD repeat-containing protein 1 OS=Homo sapiens GN=GRWD1 PE=1 SV=1;tr|M0QX71|M0QX71_HUMAN Glutamate-rich WD repeat-containing protein 1 (Fragment) OS=Homo sapiens GN=GRWD1 PE=1 SV=1	2	5	5	5	0	0	0	0	5	3	0	0	0	0	5	3	0	0	0	0	5	3	12.6	12.6	12.6	49.419	446	446;228	0	59.013	0	0	0	0	12.6
sp|Q9NW13|RBM28_HUMAN;tr|C9JE21|C9JE21_HUMAN;tr|C9JAA9|C9JAA9_HUMAN	sp|Q9NW13|RBM28_HUMAN;tr|C9JE21|C9JE21_HUMAN	1	18188000	24570000	1	1	1	1	18188000	24570000	6;3;2	6;3;2	6;3;2	sp|Q9NW13|RBM28_HUMAN RNA-binding protein 28 OS=Homo sapiens GN=RBM28 PE=1 SV=3;tr|C9JE21|C9JE21_HUMAN RNA-binding protein 28 (Fragment) OS=Homo sapiens GN=RBM28 PE=1 SV=1	3	6	6	6	0	0	0	0	6	4	0	0	0	0	6	4	0	0	0	0	6	4	8.7	8.7	8.7	85.737	759	759;204;283	0	52.559	0	0	0	0	8.7
tr|B4DY09|B4DY09_HUMAN;sp|Q12905|ILF2_HUMAN;tr|X6R6Z1|X6R6Z1_HUMAN;tr|A0A0A0MRL0|A0A0A0MRL0_HUMAN	tr|B4DY09|B4DY09_HUMAN;sp|Q12905|ILF2_HUMAN	11679000	35594000	24464000	1	1	1	11679000	35594000	24464000	7;7;3;2	7;7;3;2	7;7;3;2	tr|B4DY09|B4DY09_HUMAN Interleukin enhancer-binding factor 2 OS=Homo sapiens GN=ILF2 PE=1 SV=1;sp|Q12905|ILF2_HUMAN Interleukin enhancer-binding factor 2 OS=Homo sapiens GN=ILF2 PE=1 SV=2	4	7	7	7	1	0	0	2	6	6	1	0	0	2	6	6	1	0	0	2	6	6	23.3	23.3	23.3	38.91	352	352;390;115;150	0	49.139	2.8	0	0	8.5	23.3
sp|Q9NZI8|IF2B1_HUMAN	sp|Q9NZI8|IF2B1_HUMAN	1	14691000	23593000	1	1	1	1	14691000	23593000	6	5	5	sp|Q9NZI8|IF2B1_HUMAN Insulin-like growth factor 2 mRNA-binding protein 1 OS=Homo sapiens GN=IGF2BP1 PE=1 SV=2	1	6	5	5	0	0	0	0	5	6	0	0	0	0	4	5	0	0	0	0	4	5	15.4	13.7	13.7	63.48	577	577	0	47.53	0	0	0	0	13.2
sp|P08238|HS90B_HUMAN;sp|P07900|HS90A_HUMAN;tr|F8W026|F8W026_HUMAN;tr|Q96GW1|Q96GW1_HUMAN;sp|P14625|ENPL_HUMAN;sp|Q14568|HS902_HUMAN;sp|Q58FF8|H90B2_HUMAN	sp|P08238|HS90B_HUMAN	1	19804000	23456000	1	1	1	1	19804000	23456000	8;3;2;2;2;1;1	8;3;2;2;2;1;1	8;3;2;2;2;1;1	sp|P08238|HS90B_HUMAN Heat shock protein HSP 90-beta OS=Homo sapiens GN=HSP90AB1 PE=1 SV=4	7	8	8	8	2	0	0	0	6	5	2	0	0	0	6	5	2	0	0	0	6	5	12.2	12.2	12.2	83.263	724	724;732;49;315;803;343;381	0	66.237	3.6	0	0	0	10.4
sp|O15381|NVL_HUMAN;tr|E7EWK7|E7EWK7_HUMAN;tr|E9PGD8|E9PGD8_HUMAN;tr|E9PH71|E9PH71_HUMAN;tr|F8WF01|F8WF01_HUMAN;tr|C9JP83|C9JP83_HUMAN;tr|C9J6P7|C9J6P7_HUMAN	sp|O15381|NVL_HUMAN	1	17952000	22952000	1	1	1	1	17952000	22952000	11;4;3;3;2;1;1	11;4;3;3;2;1;1	11;4;3;3;2;1;1	sp|O15381|NVL_HUMAN Nuclear valosin-containing protein-like OS=Homo sapiens GN=NVL PE=1 SV=1	7	11	11	11	0	0	0	0	8	7	0	0	0	0	8	7	0	0	0	0	8	7	15.8	15.8	15.8	95.05	856	856;184;175;296;53;171;180	0	83.108	0	0	0	0	12
sp|P52292|IMA1_HUMAN;tr|J3QLL0|J3QLL0_HUMAN;tr|J3KS65|J3KS65_HUMAN	sp|P52292|IMA1_HUMAN;tr|J3QLL0|J3QLL0_HUMAN;tr|J3KS65|J3KS65_HUMAN	1.5126	22679000	22889000	3123100	1	1	4724000	22679000	22889000	7;5;5	7;5;5	7;5;5	sp|P52292|IMA1_HUMAN Importin subunit alpha-1 OS=Homo sapiens GN=KPNA2 PE=1 SV=1;tr|J3QLL0|J3QLL0_HUMAN Importin subunit alpha-1 (Fragment) OS=Homo sapiens GN=KPNA2 PE=1 SV=1;tr|J3KS65|J3KS65_HUMAN Importin subunit alpha-1 (Fragment) OS=Homo sapiens GN=KPN	3	7	7	7	2	0	0	2	6	6	2	0	0	2	6	6	2	0	0	2	6	6	19.5	19.5	19.5	57.861	529	529;134;143	0	77.668	6.2	0	0	6.2	18.1
sp|Q15717|ELAV1_HUMAN;tr|M0QZR9|M0QZR9_HUMAN;tr|M0R055|M0R055_HUMAN	sp|Q15717|ELAV1_HUMAN;tr|M0QZR9|M0QZR9_HUMAN	9243000	18291000	22888000	1	1	1	9243000	18291000	22888000	6;4;1	6;4;1	6;4;1	sp|Q15717|ELAV1_HUMAN ELAV-like protein 1 OS=Homo sapiens GN=ELAVL1 PE=1 SV=2;tr|M0QZR9|M0QZR9_HUMAN ELAV-like protein 1 OS=Homo sapiens GN=ELAVL1 PE=1 SV=1	3	6	6	6	0	0	0	3	6	4	0	0	0	3	6	4	0	0	0	3	6	4	25.8	25.8	25.8	36.091	326	326;153;133	0	41.913	0	0	0	10.7	25.8
tr|E9PL09|E9PL09_HUMAN;tr|H0YEU2|H0YEU2_HUMAN	tr|E9PL09|E9PL09_HUMAN;tr|H0YEU2|H0YEU2_HUMAN	1	1	22667000	1	1	1	1	1	22667000	15;9	1;1	0;0	tr|E9PL09|E9PL09_HUMAN 40S ribosomal protein S3 OS=Homo sapiens GN=RPS3 PE=1 SV=1;tr|H0YEU2|H0YEU2_HUMAN 40S ribosomal protein S3 (Fragment) OS=Homo sapiens GN=RPS3 PE=1 SV=1	2	15	1	0	3	0	0	8	12	11	0	0	0	1	0	1	0	0	0	0	0	0	60.6	6.9	0	25.371	231	231;171	1	-2	13	0	0	39	40.3
tr|A0A087X2D0|A0A087X2D0_HUMAN;sp|P84103|SRSF3_HUMAN	tr|A0A087X2D0|A0A087X2D0_HUMAN;sp|P84103|SRSF3_HUMAN	1	13872000	22108000	1	1	1	1	13872000	22108000	5;5	4;4	4;4	tr|A0A087X2D0|A0A087X2D0_HUMAN Serine/arginine-rich-splicing factor 3 OS=Homo sapiens GN=SRSF3 PE=1 SV=1;sp|P84103|SRSF3_HUMAN Serine/arginine-rich splicing factor 3 OS=Homo sapiens GN=SRSF3 PE=1 SV=1	2	5	4	4	0	1	0	2	4	5	0	1	0	1	3	4	0	1	0	1	3	4	49.5	49.5	49.5	10.32	95	95;164	0	25.033	0	9.5	0	24.2	40
sp|Q5JTH9|RRP12_HUMAN;tr|A0A087X0G0|A0A087X0G0_HUMAN;tr|A0A087X1U8|A0A087X1U8_HUMAN	sp|Q5JTH9|RRP12_HUMAN	1	34937000	21618000	1	1	1	1	34937000	21618000	11;1;1	11;1;1	11;1;1	sp|Q5JTH9|RRP12_HUMAN RRP12-like protein OS=Homo sapiens GN=RRP12 PE=1 SV=2	3	11	11	11	0	0	0	0	10	6	0	0	0	0	10	6	0	0	0	0	10	6	11.9	11.9	11.9	143.7	1297	1297;106;177	0	95.924	0	0	0	0	11.3
sp|Q9H583|HEAT1_HUMAN;tr|Q5T3Q7|Q5T3Q7_HUMAN;tr|Q6P664|Q6P664_HUMAN	sp|Q9H583|HEAT1_HUMAN;tr|Q5T3Q7|Q5T3Q7_HUMAN	1	11215000	21349000	1	1	1	1	11215000	21349000	8;8;1	8;8;1	8;8;1	sp|Q9H583|HEAT1_HUMAN HEAT repeat-containing protein 1 OS=Homo sapiens GN=HEATR1 PE=1 SV=3;tr|Q5T3Q7|Q5T3Q7_HUMAN HEAT repeat-containing protein 1 OS=Homo sapiens GN=HEATR1 PE=1 SV=1	3	8	8	8	0	0	0	0	7	5	0	0	0	0	7	5	0	0	0	0	7	5	4.5	4.5	4.5	242.37	2144	2144;2063;120	0	63.717	0	0	0	0	4
sp|Q9NY93|DDX56_HUMAN;tr|J3KQ18|J3KQ18_HUMAN;tr|H7C3E9|H7C3E9_HUMAN;tr|F8WDT8|F8WDT8_HUMAN;tr|F8WEI3|F8WEI3_HUMAN;tr|H7BZN7|H7BZN7_HUMAN	sp|Q9NY93|DDX56_HUMAN;tr|J3KQ18|J3KQ18_HUMAN;tr|H7C3E9|H7C3E9_HUMAN;tr|F8WDT8|F8WDT8_HUMAN	1	24549000	20646000	1	1	1	1	24549000	20646000	7;6;5;4;2;1	7;6;5;4;2;1	7;6;5;4;2;1	sp|Q9NY93|DDX56_HUMAN Probable ATP-dependent RNA helicase DDX56 OS=Homo sapiens GN=DDX56 PE=1 SV=1;tr|J3KQ18|J3KQ18_HUMAN D-dopachrome decarboxylase OS=Homo sapiens GN=DDT PE=1 SV=1;tr|H7C3E9|H7C3E9_HUMAN Probable ATP-dependent RNA helicase DDX56 (Fragment	6	7	7	7	0	0	0	0	7	3	0	0	0	0	7	3	0	0	0	0	7	3	15.7	15.7	15.7	61.589	547	547;1401;396;185;103;182	0	49.552	0	0	0	0	15.7
sp|Q14692|BMS1_HUMAN	sp|Q14692|BMS1_HUMAN	1	25391000	20424000	1	1	1	1	25391000	20424000	12	12	12	sp|Q14692|BMS1_HUMAN Ribosome biogenesis protein BMS1 homolog OS=Homo sapiens GN=BMS1 PE=1 SV=1	1	12	12	12	0	0	0	1	8	11	0	0	0	1	8	11	0	0	0	1	8	11	12.8	12.8	12.8	145.81	1282	1282	0	98.747	0	0	0	1.1	9.2
sp|Q8TDD1|DDX54_HUMAN;tr|F8VRX4|F8VRX4_HUMAN	sp|Q8TDD1|DDX54_HUMAN;tr|F8VRX4|F8VRX4_HUMAN	1	21098000	20365000	1	1	1	1	21098000	20365000	8;5	8;5	8;5	sp|Q8TDD1|DDX54_HUMAN ATP-dependent RNA helicase DDX54 OS=Homo sapiens GN=DDX54 PE=1 SV=2;tr|F8VRX4|F8VRX4_HUMAN ATP-dependent RNA helicase DDX54 (Fragment) OS=Homo sapiens GN=DDX54 PE=1 SV=1	2	8	8	8	0	0	0	0	6	5	0	0	0	0	6	5	0	0	0	0	6	5	12.9	12.9	12.9	98.594	881	881;208	0	76.938	0	0	0	0	9.4
tr|B4DXZ6|B4DXZ6_HUMAN;sp|P51114|FXR1_HUMAN;tr|E7EU85|E7EU85_HUMAN;tr|E9PFF5|E9PFF5_HUMAN;tr|H7C4S4|H7C4S4_HUMAN;tr|C9JY20|C9JY20_HUMAN;tr|C9JAJ4|C9JAJ4_HUMAN;tr|C9JZE0|C9JZE0_HUMAN	tr|B4DXZ6|B4DXZ6_HUMAN;sp|P51114|FXR1_HUMAN;tr|E7EU85|E7EU85_HUMAN;tr|E9PFF5|E9PFF5_HUMAN	1	25333000	20091000	1	1	1	1	25333000	20091000	10;10;9;9;2;1;1;1	10;10;9;9;2;1;1;1	8;8;7;7;2;1;1;1	tr|B4DXZ6|B4DXZ6_HUMAN Fragile X mental retardation syndrome-related protein 1 OS=Homo sapiens GN=FXR1 PE=1 SV=1;sp|P51114|FXR1_HUMAN Fragile X mental retardation syndrome-related protein 1 OS=Homo sapiens GN=FXR1 PE=1 SV=3;tr|E7EU85|E7EU85_HUMAN Fragile X	8	10	10	8	0	0	0	0	9	4	0	0	0	0	9	4	0	0	0	0	8	3	27	27	24.3	68.326	608	608;621;454;490;247;123;151;343	0	74.716	0	0	0	0	25.7
sp|Q9GZL7|WDR12_HUMAN	sp|Q9GZL7|WDR12_HUMAN	1	20836000	19458000	1	1	1	1	20836000	19458000	7	7	7	sp|Q9GZL7|WDR12_HUMAN Ribosome biogenesis protein WDR12 OS=Homo sapiens GN=WDR12 PE=1 SV=2	1	7	7	7	0	0	0	0	6	5	0	0	0	0	6	5	0	0	0	0	6	5	22.7	22.7	22.7	47.707	423	423	0	44.418	0	0	0	0	21
sp|Q9BVI4|NOC4L_HUMAN;tr|F5H303|F5H303_HUMAN	sp|Q9BVI4|NOC4L_HUMAN	1	8949200	19171000	1	1	1	1	8949200	19171000	7;2	7;2	7;2	sp|Q9BVI4|NOC4L_HUMAN Nucleolar complex protein 4 homolog OS=Homo sapiens GN=NOC4L PE=1 SV=1	2	7	7	7	0	0	0	0	7	4	0	0	0	0	7	4	0	0	0	0	7	4	19.8	19.8	19.8	58.467	516	516;270	0	44.286	0	0	0	0	19.8
sp|Q03701|CEBPZ_HUMAN;tr|A0A087X1N2|A0A087X1N2_HUMAN;tr|C9J9W7|C9J9W7_HUMAN	sp|Q03701|CEBPZ_HUMAN;tr|A0A087X1N2|A0A087X1N2_HUMAN	1	12918000	18999000	1	1	1	1	12918000	18999000	10;10;1	10;10;1	10;10;1	sp|Q03701|CEBPZ_HUMAN CCAAT/enhancer-binding protein zeta OS=Homo sapiens GN=CEBPZ PE=1 SV=3;tr|A0A087X1N2|A0A087X1N2_HUMAN CCAAT/enhancer-binding protein zeta OS=Homo sapiens GN=CEBPZ PE=1 SV=1	3	10	10	10	0	0	0	0	9	5	0	0	0	0	9	5	0	0	0	0	9	5	9.1	9.1	9.1	120.97	1054	1054;998;146	0	65.578	0	0	0	0	8.1
sp|O95478|NSA2_HUMAN;tr|A0A0A0MQZ6|A0A0A0MQZ6_HUMAN	sp|O95478|NSA2_HUMAN	1	19729000	18979000	1	1	1	1	19729000	18979000	5;2	5;2	5;2	sp|O95478|NSA2_HUMAN Ribosome biogenesis protein NSA2 homolog OS=Homo sapiens GN=NSA2 PE=1 SV=1	2	5	5	5	0	0	0	0	2	5	0	0	0	0	2	5	0	0	0	0	2	5	2.1	2.1	2.1	337.39	3075	3075;189	0	31.908	0	0	0	0	0.6
tr|A0A0A0MRA5|A0A0A0MRA5_HUMAN;tr|B7Z4B8|B7Z4B8_HUMAN;sp|Q9BUJ2|HNRL1_HUMAN;tr|M0QYZ0|M0QYZ0_HUMAN;tr|M0R3F1|M0R3F1_HUMAN;tr|M0R203|M0R203_HUMAN;tr|M0QZV6|M0QZV6_HUMAN;tr|M0R0K8|M0R0K8_HUMAN;tr|M0QYI8|M0QYI8_HUMAN;tr|M0QYM5|M0QYM5_HUMAN	tr|A0A0A0MRA5|A0A0A0MRA5_HUMAN;tr|B7Z4B8|B7Z4B8_HUMAN;sp|Q9BUJ2|HNRL1_HUMAN;tr|M0QYZ0|M0QYZ0_HUMAN;tr|M0R3F1|M0R3F1_HUMAN	13871000	19908000	18827000	1	1	1	13871000	19908000	18827000	8;8;8;7;5;3;3;3;2;1	8;8;8;7;5;3;3;3;2;1	8;8;8;7;5;3;3;3;2;1	tr|A0A0A0MRA5|A0A0A0MRA5_HUMAN Heterogeneous nuclear ribonucleoprotein U-like protein 1 OS=Homo sapiens GN=HNRNPUL1 PE=1 SV=1;tr|B7Z4B8|B7Z4B8_HUMAN Heterogeneous nuclear ribonucleoprotein U-like protein 1 OS=Homo sapiens GN=HNRNPUL1 PE=1 SV=1;sp|Q9BUJ2|HN	10	8	8	8	0	0	1	3	6	5	0	0	1	3	6	5	0	0	1	3	6	5	12.4	12.4	12.4	85.939	766	766;767;856;371;641;81;118;158;359;90	0	53.988	0	0	2	5.6	12.3
sp|P56182|RRP1_HUMAN;tr|D6RE82|D6RE82_HUMAN	sp|P56182|RRP1_HUMAN	1	17528000	18580000	1	1	1	1	17528000	18580000	7;1	7;1	7;1	sp|P56182|RRP1_HUMAN Ribosomal RNA processing protein 1 homolog A OS=Homo sapiens GN=RRP1 PE=1 SV=1	2	7	7	7	0	0	0	0	7	3	0	0	0	0	7	3	0	0	0	0	7	3	16.1	16.1	16.1	52.839	461	461;45	0	51.676	0	0	0	0	16.1
sp|Q9NVI7|ATD3A_HUMAN;tr|Q5SV16|Q5SV16_HUMAN	sp|Q9NVI7|ATD3A_HUMAN	1	24347000	18564000	1	1	1	1	24347000	18564000	9;3	9;3	1;0	sp|Q9NVI7|ATD3A_HUMAN ATPase family AAA domain-containing protein 3A OS=Homo sapiens GN=ATAD3A PE=1 SV=2	2	9	9	1	2	0	0	0	6	7	2	0	0	0	6	7	0	0	0	0	1	1	18.5	18.5	1.3	71.368	634	634;516	0	59.335	3	0	0	0	12.8
tr|A0A0A0MRH0|A0A0A0MRH0_HUMAN;sp|Q9NVX2|NLE1_HUMAN;tr|K7EN33|K7EN33_HUMAN;tr|K7ERN7|K7ERN7_HUMAN	tr|A0A0A0MRH0|A0A0A0MRH0_HUMAN;sp|Q9NVX2|NLE1_HUMAN;tr|K7EN33|K7EN33_HUMAN	1	9451400	18528000	1	1	1	1	9451400	18528000	4;4;3;1	4;4;3;1	4;4;3;1	tr|A0A0A0MRH0|A0A0A0MRH0_HUMAN Notchless protein homolog 1 OS=Homo sapiens GN=NLE1 PE=1 SV=1;sp|Q9NVX2|NLE1_HUMAN Notchless protein homolog 1 OS=Homo sapiens GN=NLE1 PE=1 SV=4;tr|K7EN33|K7EN33_HUMAN Notchless protein homolog 1 (Fragment) OS=Homo sapiens GN	4	4	4	4	0	0	0	0	3	4	0	0	0	0	3	4	0	0	0	0	3	4	17.6	17.6	17.6	48.511	443	443;485;304;127	0	37.736	0	0	0	0	13.5
sp|P62750|RL23A_HUMAN;tr|H7BY10|H7BY10_HUMAN;tr|K7EJV9|K7EJV9_HUMAN;tr|K7ERT8|K7ERT8_HUMAN;tr|A8MUS3|A8MUS3_HUMAN;tr|K7EMA7|K7EMA7_HUMAN	sp|P62750|RL23A_HUMAN;tr|H7BY10|H7BY10_HUMAN;tr|K7EJV9|K7EJV9_HUMAN;tr|K7ERT8|K7ERT8_HUMAN;tr|A8MUS3|A8MUS3_HUMAN;tr|K7EMA7|K7EMA7_HUMAN	1	19296000	18443000	1	1	1	1	19296000	18443000	6;6;6;6;6;3	6;6;6;6;6;3	6;6;6;6;6;3	sp|P62750|RL23A_HUMAN 60S ribosomal protein L23a OS=Homo sapiens GN=RPL23A PE=1 SV=1;tr|H7BY10|H7BY10_HUMAN 60S ribosomal protein L23a (Fragment) OS=Homo sapiens GN=RPL23A PE=1 SV=1;tr|K7EJV9|K7EJV9_HUMAN 60S ribosomal protein L23a (Fragment) OS=Homo sapie	6	6	6	6	0	0	0	1	4	4	0	0	0	1	4	4	0	0	0	1	4	4	33.3	33.3	33.3	17.695	156	156;158;170;175;194;70	0	39.853	0	0	0	8.3	26.9
sp|Q14694|UBP10_HUMAN;tr|H3BQP1|H3BQP1_HUMAN;tr|J3KT19|J3KT19_HUMAN;tr|H3BNS8|H3BNS8_HUMAN;tr|H3BQC6|H3BQC6_HUMAN;tr|H3BNA1|H3BNA1_HUMAN	sp|Q14694|UBP10_HUMAN	1	19162000	18399000	1	1	1	1	19162000	18399000	7;2;2;1;1;1	7;2;2;1;1;1	7;2;2;1;1;1	sp|Q14694|UBP10_HUMAN Ubiquitin carboxyl-terminal hydrolase 10 OS=Homo sapiens GN=USP10 PE=1 SV=2	6	7	7	7	0	0	0	0	6	5	0	0	0	0	6	5	0	0	0	0	6	5	12.5	12.5	12.5	87.133	798	798;110;208;76;141;150	0	58.132	0	0	0	0	10.7
sp|Q59GN2|R39L5_HUMAN;sp|P62891|RL39_HUMAN	sp|Q59GN2|R39L5_HUMAN;sp|P62891|RL39_HUMAN	1	1	18270000	1	1	1	1	1	18270000	1;1	1;1	1;1	sp|Q59GN2|R39L5_HUMAN Putative 60S ribosomal protein L39-like 5 OS=Homo sapiens GN=RPL39P5 PE=5 SV=2;sp|P62891|RL39_HUMAN 60S ribosomal protein L39 OS=Homo sapiens GN=RPL39 PE=1 SV=2	2	1	1	1	0	0	0	0	1	1	0	0	0	0	1	1	0	0	0	0	1	1	19.6	19.6	19.6	6.3225	51	51;51	0.005698	6.5273	0	0	0	0	19.6
tr|D6RC52|D6RC52_HUMAN;tr|D6RCB9|D6RCB9_HUMAN;sp|Q9NX24|NHP2_HUMAN;tr|H0YC83|H0YC83_HUMAN;tr|J3QSY4|J3QSY4_HUMAN	tr|D6RC52|D6RC52_HUMAN;tr|D6RCB9|D6RCB9_HUMAN;sp|Q9NX24|NHP2_HUMAN;tr|H0YC83|H0YC83_HUMAN;tr|J3QSY4|J3QSY4_HUMAN	1	21001000	18195000	1	1	1	1	21001000	18195000	2;2;2;1;1	2;2;2;1;1	2;2;2;1;1	tr|D6RC52|D6RC52_HUMAN H/ACA ribonucleoprotein complex subunit 2 (Fragment) OS=Homo sapiens GN=NHP2 PE=1 SV=1;tr|D6RCB9|D6RCB9_HUMAN H/ACA ribonucleoprotein complex subunit 2 (Fragment) OS=Homo sapiens GN=NHP2 PE=1 SV=1;sp|Q9NX24|NHP2_HUMAN H/ACA ribonucle	5	2	2	2	0	0	0	0	2	2	0	0	0	0	2	2	0	0	0	0	2	2	22	22	22	15.017	132	132;135;153;85;90	0	15	0	0	0	0	22
sp|Q13283|G3BP1_HUMAN;tr|E5RIZ6|E5RIZ6_HUMAN;tr|E5RH00|E5RH00_HUMAN;tr|E5RI46|E5RI46_HUMAN;tr|E5RIF8|E5RIF8_HUMAN;tr|E5RJU8|E5RJU8_HUMAN;tr|E5RH42|E5RH42_HUMAN;tr|D6R9A4|D6R9A4_HUMAN;tr|D6RBM9|D6RBM9_HUMAN;tr|D6REX8|D6REX8_HUMAN;tr|D6RBR0|D6RBR0_HUMAN;tr|D6RE13|D6RE13_HUMAN;tr|D6RBW8|D6RBW8_HUMAN;tr|D6R9X5|D6R9X5_HUMAN	sp|Q13283|G3BP1_HUMAN	1	14697000	18076000	1	1	1	1	14697000	18076000	9;3;2;2;2;2;2;1;1;1;1;1;1;1	9;3;2;2;2;2;2;1;1;1;1;1;1;1	8;2;1;1;1;1;1;0;0;0;0;0;0;0	sp|Q13283|G3BP1_HUMAN Ras GTPase-activating protein-binding protein 1 OS=Homo sapiens GN=G3BP1 PE=1 SV=1	14	9	9	8	0	0	0	0	8	4	0	0	0	0	8	4	0	0	0	0	8	3	27.7	27.7	25.1	52.164	466	466;148;37;105;106;153;406;59;78;99;102;111;116;291	0	87.904	0	0	0	0	25.1
sp|Q9GZR7|DDX24_HUMAN;tr|G3V529|G3V529_HUMAN;tr|F5GYL3|F5GYL3_HUMAN;tr|A0A087WXU8|A0A087WXU8_HUMAN	sp|Q9GZR7|DDX24_HUMAN;tr|G3V529|G3V529_HUMAN;tr|F5GYL3|F5GYL3_HUMAN;tr|A0A087WXU8|A0A087WXU8_HUMAN	1	16846000	17413000	1	1	1	1	16846000	17413000	9;9;7;6	9;9;7;6	9;9;7;6	sp|Q9GZR7|DDX24_HUMAN ATP-dependent RNA helicase DDX24 OS=Homo sapiens GN=DDX24 PE=1 SV=1;tr|G3V529|G3V529_HUMAN ATP-dependent RNA helicase DDX24 OS=Homo sapiens GN=DDX24 PE=1 SV=1;tr|F5GYL3|F5GYL3_HUMAN ATP-dependent RNA helicase DDX24 OS=Homo sapiens GN=	4	9	9	9	0	0	0	0	8	7	0	0	0	0	8	7	0	0	0	0	8	7	13.9	13.9	13.9	96.331	859	859;1045;1115;485	0	58.791	0	0	0	0	12.3
sp|Q9Y2P8|RCL1_HUMAN;tr|Q5VZU3|Q5VZU3_HUMAN;tr|A0A087X1L9|A0A087X1L9_HUMAN;tr|Q5VZU2|Q5VZU2_HUMAN;tr|Q5VYW8|Q5VYW8_HUMAN	sp|Q9Y2P8|RCL1_HUMAN	1	7845300	17400000	1	1	1	1	7845300	17400000	7;3;3;2;2	7;3;3;2;2	7;3;3;2;2	sp|Q9Y2P8|RCL1_HUMAN RNA 3-terminal phosphate cyclase-like protein OS=Homo sapiens GN=RCL1 PE=1 SV=3	5	7	7	7	0	0	0	0	5	5	0	0	0	0	5	5	0	0	0	0	5	5	21.4	21.4	21.4	40.842	373	373;182;215;138;175	0	44.955	0	0	0	0	15.3
tr|A0A0A0MTB8|A0A0A0MTB8_HUMAN;sp|Q8NI36|WDR36_HUMAN	tr|A0A0A0MTB8|A0A0A0MTB8_HUMAN;sp|Q8NI36|WDR36_HUMAN	1	15071000	17286000	1	1	1	1	15071000	17286000	11;11	11;11	11;11	tr|A0A0A0MTB8|A0A0A0MTB8_HUMAN WD repeat-containing protein 36 OS=Homo sapiens GN=WDR36 PE=1 SV=1;sp|Q8NI36|WDR36_HUMAN WD repeat-containing protein 36 OS=Homo sapiens GN=WDR36 PE=1 SV=1	2	11	11	11	0	0	0	0	7	10	0	0	0	0	7	10	0	0	0	0	7	10	16.2	16.2	16.2	99.365	895	895;951	0	70.7	0	0	0	0	10.1
sp|Q13595|TRA2A_HUMAN	sp|Q13595|TRA2A_HUMAN	1	20688000	17097000	1	1	1	1	20688000	17097000	5	4	4	sp|Q13595|TRA2A_HUMAN Transformer-2 protein homolog alpha OS=Homo sapiens GN=TRA2A PE=1 SV=1	1	5	4	4	1	0	0	1	5	4	1	0	0	1	4	3	1	0	0	1	4	3	18.8	15.2	15.2	32.688	282	282	0	27.524	5	0	0	5	18.8
tr|C9J9K3|C9J9K3_HUMAN;sp|P08865|RSSA_HUMAN;tr|A0A0C4DG17|A0A0C4DG17_HUMAN;tr|A6NE09|A6NE09_HUMAN;tr|C9JQR9|C9JQR9_HUMAN	tr|C9J9K3|C9J9K3_HUMAN;sp|P08865|RSSA_HUMAN;tr|A0A0C4DG17|A0A0C4DG17_HUMAN;tr|A6NE09|A6NE09_HUMAN	13862000	19574000	16861000	1	1	1	13862000	19574000	16861000	6;6;6;5;2	6;6;6;5;2	6;6;6;5;2	tr|C9J9K3|C9J9K3_HUMAN 40S ribosomal protein SA (Fragment) OS=Homo sapiens GN=RPSA PE=1 SV=5;sp|P08865|RSSA_HUMAN 40S ribosomal protein SA OS=Homo sapiens GN=RPSA PE=1 SV=4;tr|A0A0C4DG17|A0A0C4DG17_HUMAN 40S ribosomal protein SA OS=Homo sapiens GN=RPSA PE=	5	6	6	6	0	0	0	2	4	5	0	0	0	2	4	5	0	0	0	2	4	5	30.3	30.3	30.3	29.505	264	264;295;300;295;73	0	60.808	0	0	0	11.4	21.6
sp|Q8N0Y7|PGAM4_HUMAN;tr|Q53RS6|Q53RS6_HUMAN	sp|Q8N0Y7|PGAM4_HUMAN	1.57329e-07	11047000	16266000	6356100	1	1	1	11047000	16266000	10;3	10;3	10;3	sp|Q8N0Y7|PGAM4_HUMAN Probable phosphoglycerate mutase 4 OS=Homo sapiens GN=PGAM4 PE=3 SV=1	2	10	10	10	2	0	0	1	7	9	2	0	0	1	7	9	2	0	0	1	7	9	13.4	13.4	13.4	71.225	651	651;279	0	66.269	4.6	0	0	1.5	11.5
tr|A0A0B4J2E5|A0A0B4J2E5_HUMAN;sp|Q15269|PWP2_HUMAN;tr|C9J544|C9J544_HUMAN;tr|A0A096LPI6|A0A096LPI6_HUMAN	tr|A0A0B4J2E5|A0A0B4J2E5_HUMAN;sp|Q15269|PWP2_HUMAN	1	9232100	16169000	1	1	1	1	9232100	16169000	5;5;1;1	5;5;1;1	5;5;1;1	tr|A0A0B4J2E5|A0A0B4J2E5_HUMAN Uncharacterized protein OS=Homo sapiens PE=1 SV=1;sp|Q15269|PWP2_HUMAN Periodic tryptophan protein 2 homolog OS=Homo sapiens GN=PWP2 PE=1 SV=2	4	5	5	5	0	0	0	0	4	3	0	0	0	0	4	3	0	0	0	0	4	3	7	7	7	102.45	919	919;919;187;238	0	49.845	0	0	0	0	5.9
sp|P22626|ROA2_HUMAN;tr|A0A087WUI2|A0A087WUI2_HUMAN	sp|P22626|ROA2_HUMAN;tr|A0A087WUI2|A0A087WUI2_HUMAN	10596000	16362000	16135000	1	1	1	10596000	16362000	16135000	6;4	6;4	6;4	sp|P22626|ROA2_HUMAN Heterogeneous nuclear ribonucleoproteins A2/B1 OS=Homo sapiens GN=HNRNPA2B1 PE=1 SV=2;tr|A0A087WUI2|A0A087WUI2_HUMAN Heterogeneous nuclear ribonucleoproteins A2/B1 OS=Homo sapiens GN=HNRNPA2B1 PE=1 SV=1	2	6	6	6	1	1	1	3	4	4	1	1	1	3	4	4	1	1	1	3	4	4	21.2	21.2	21.2	37.429	353	353;261	0	41.878	2.8	4.2	4.5	9.9	15.6
sp|Q9Y4W2|LAS1L_HUMAN	sp|Q9Y4W2|LAS1L_HUMAN	1	11776000	16069000	1	1	1	1	11776000	16069000	6	6	6	sp|Q9Y4W2|LAS1L_HUMAN Ribosomal biogenesis protein LAS1L OS=Homo sapiens GN=LAS1L PE=1 SV=2	1	6	6	6	0	0	0	0	5	3	0	0	0	0	5	3	0	0	0	0	5	3	10.6	10.6	10.6	83.064	734	734	0	39.921	0	0	0	0	8.3
sp|Q15233|NONO_HUMAN;tr|H7C367|H7C367_HUMAN;tr|C9IZL7|C9IZL7_HUMAN;tr|C9JYS8|C9JYS8_HUMAN;tr|C9J4X2|C9J4X2_HUMAN	sp|Q15233|NONO_HUMAN;tr|H7C367|H7C367_HUMAN	0.971916	33367000	15871000	8545900	1	1	8305900	33367000	15871000	10;6;4;4;1	10;6;4;4;1	9;5;3;4;1	sp|Q15233|NONO_HUMAN Non-POU domain-containing octamer-binding protein OS=Homo sapiens GN=NONO PE=1 SV=4;tr|H7C367|H7C367_HUMAN Non-POU domain-containing octamer-binding protein (Fragment) OS=Homo sapiens GN=NONO PE=1 SV=5	5	10	10	9	4	0	0	5	7	7	4	0	0	5	7	7	4	0	0	4	6	6	27.6	27.6	25.9	54.231	471	471;235;207;248;124	0	73.279	10	0	0	13	21.4
tr|E7EWK3|E7EWK3_HUMAN;sp|Q9H2U1|DHX36_HUMAN;tr|H7C514|H7C514_HUMAN;tr|H7C5F5|H7C5F5_HUMAN	tr|E7EWK3|E7EWK3_HUMAN;sp|Q9H2U1|DHX36_HUMAN	1	17903000	15493000	1	1	1	1	17903000	15493000	9;9;1;1	9;9;1;1	9;9;1;1	tr|E7EWK3|E7EWK3_HUMAN ATP-dependent RNA helicase DHX36 (Fragment) OS=Homo sapiens GN=DHX36 PE=1 SV=1;sp|Q9H2U1|DHX36_HUMAN ATP-dependent RNA helicase DHX36 OS=Homo sapiens GN=DHX36 PE=1 SV=2	4	9	9	9	0	0	0	0	8	5	0	0	0	0	8	5	0	0	0	0	8	5	14.8	14.8	14.8	91.43	797	797;1008;119;188	0	66.983	0	0	0	0	13.3
sp|Q9Y2R4|DDX52_HUMAN;tr|A0A087X1P7|A0A087X1P7_HUMAN;tr|A0A087WTD6|A0A087WTD6_HUMAN;tr|A0A087X069|A0A087X069_HUMAN;tr|A0A087X121|A0A087X121_HUMAN	sp|Q9Y2R4|DDX52_HUMAN	1	11745000	15404000	1	1	1	1	11745000	15404000	6;1;1;1;1	6;1;1;1;1	6;1;1;1;1	sp|Q9Y2R4|DDX52_HUMAN Probable ATP-dependent RNA helicase DDX52 OS=Homo sapiens GN=DDX52 PE=1 SV=3	5	6	6	6	0	0	0	0	6	4	0	0	0	0	6	4	0	0	0	0	6	4	14	14	14	67.497	599	599;97;101;112;115	0	41.388	0	0	0	0	14
sp|O75683|SURF6_HUMAN	sp|O75683|SURF6_HUMAN	1	10153000	14973000	1	1	1	1	10153000	14973000	5	5	5	sp|O75683|SURF6_HUMAN Surfeit locus protein 6 OS=Homo sapiens GN=SURF6 PE=1 SV=3	1	5	5	5	0	0	0	0	3	5	0	0	0	0	3	5	0	0	0	0	3	5	10.2	10.2	10.2	41.45	361	361	0	34.359	0	0	0	0	10
sp|O15213|WDR46_HUMAN;tr|H0Y6G3|H0Y6G3_HUMAN	sp|O15213|WDR46_HUMAN;tr|H0Y6G3|H0Y6G3_HUMAN	1	19887000	14651000	1	1	1	1	19887000	14651000	6;3	6;3	3;0	sp|O15213|WDR46_HUMAN WD repeat-containing protein 46 OS=Homo sapiens GN=WDR46 PE=1 SV=3;tr|H0Y6G3|H0Y6G3_HUMAN WD repeat-containing protein 46 (Fragment) OS=Homo sapiens GN=WDR46 PE=1 SV=1	2	6	6	3	0	0	0	0	6	6	0	0	0	0	6	6	0	0	0	0	3	3	17.4	17.4	8	68.07	610	610;322	0	60.944	0	0	0	0	17.4
sp|Q5SY16|NOL9_HUMAN	sp|Q5SY16|NOL9_HUMAN	1	10932000	14478000	1	1	1	1	10932000	14478000	4	4	4	sp|Q5SY16|NOL9_HUMAN Polynucleotide 5-hydroxyl-kinase NOL9 OS=Homo sapiens GN=NOL9 PE=1 SV=1	1	4	4	4	0	0	0	0	3	4	0	0	0	0	3	4	0	0	0	0	3	4	7.4	7.4	7.4	79.322	702	702	0	30.527	0	0	0	0	5.1
sp|Q15365|PCBP1_HUMAN;tr|J3QT27|J3QT27_HUMAN;sp|P57721|PCBP3_HUMAN;tr|E9PFP8|E9PFP8_HUMAN	sp|Q15365|PCBP1_HUMAN	0.940772	10412000	14362000	5943100	1	1	5591100	10412000	14362000	3;1;1;1	3;1;1;1	2;0;0;0	sp|Q15365|PCBP1_HUMAN Poly(rC)-binding protein 1 OS=Homo sapiens GN=PCBP1 PE=1 SV=2	4	3	3	2	3	1	1	2	2	2	3	1	1	2	2	2	2	1	1	1	1	1	2.4	2.4	1.3	194.66	1822	1822;322;371;880	0	23.266	2.4	0.7	0.7	1.8	1.8
sp|P55769|NH2L1_HUMAN;tr|B1AHD1|B1AHD1_HUMAN	sp|P55769|NH2L1_HUMAN;tr|B1AHD1|B1AHD1_HUMAN	7374200	10681000	14166000	1	1	1	7374200	10681000	14166000	2;2	2;2	2;2	sp|P55769|NH2L1_HUMAN NHP2-like protein 1 OS=Homo sapiens GN=NHP2L1 PE=1 SV=3;tr|B1AHD1|B1AHD1_HUMAN NHP2-like protein 1 OS=Homo sapiens GN=NHP2L1 PE=1 SV=1	2	2	2	2	0	0	0	2	2	2	0	0	0	2	2	2	0	0	0	2	2	2	18	18	18	14.173	128	128;132	0	22.77	0	0	0	18	18
sp|P0CW22|RS17L_HUMAN;sp|P08708|RS17_HUMAN;tr|H0YN88|H0YN88_HUMAN;tr|A0A075B716|A0A075B716_HUMAN	sp|P0CW22|RS17L_HUMAN;sp|P08708|RS17_HUMAN;tr|H0YN88|H0YN88_HUMAN;tr|A0A075B716|A0A075B716_HUMAN	1	13247000	13886000	1	1	1	1	13247000	13886000	3;3;2;2	3;3;2;2	3;3;2;2	sp|P0CW22|RS17L_HUMAN 40S ribosomal protein S17-like OS=Homo sapiens GN=RPS17L PE=1 SV=1;sp|P08708|RS17_HUMAN 40S ribosomal protein S17 OS=Homo sapiens GN=RPS17 PE=1 SV=2;tr|H0YN88|H0YN88_HUMAN 40S ribosomal protein S17 OS=Homo sapiens GN=RPS17 PE=1 SV=1;t	4	3	3	3	0	0	0	0	2	3	0	0	0	0	2	3	0	0	0	0	2	3	40	40	40	15.55	135	135;135;136;191	0	44.54	0	0	0	0	32.6
sp|O15042|SR140_HUMAN;tr|E7ET15|E7ET15_HUMAN;tr|H7C4V2|H7C4V2_HUMAN;tr|E7EW00|E7EW00_HUMAN;tr|H0Y8D9|H0Y8D9_HUMAN	sp|O15042|SR140_HUMAN;tr|E7ET15|E7ET15_HUMAN	1	12781000	13881000	1	1	1	1	12781000	13881000	9;8;2;2;2	9;8;2;2;2	9;8;2;2;2	sp|O15042|SR140_HUMAN U2 snRNP-associated SURP motif-containing protein OS=Homo sapiens GN=U2SURP PE=1 SV=2;tr|E7ET15|E7ET15_HUMAN U2 snRNP-associated SURP motif-containing protein OS=Homo sapiens GN=U2SURP PE=1 SV=1	5	9	9	9	2	0	0	1	7	5	2	0	0	1	7	5	2	0	0	1	7	5	11.4	11.4	11.4	118.29	1029	1029;1028;290;425;439	0	60.672	2.3	0	0	1.2	8.8
sp|Q9H0S4|DDX47_HUMAN;tr|F5H1N9|F5H1N9_HUMAN	sp|Q9H0S4|DDX47_HUMAN	1	12313000	13803000	1	1	1	1	12313000	13803000	5;1	5;1	5;1	sp|Q9H0S4|DDX47_HUMAN Probable ATP-dependent RNA helicase DDX47 OS=Homo sapiens GN=DDX47 PE=1 SV=1	2	5	5	5	0	0	0	0	5	2	0	0	0	0	5	2	0	0	0	0	5	2	14.1	14.1	14.1	50.646	455	455;196	0	35.102	0	0	0	0	14.1
sp|P62854|RS26_HUMAN;sp|Q5JNZ5|RS26L_HUMAN	sp|P62854|RS26_HUMAN;sp|Q5JNZ5|RS26L_HUMAN	1	15238000	13639000	1	1	1	1	15238000	13639000	2;1	2;1	2;1	sp|P62854|RS26_HUMAN 40S ribosomal protein S26 OS=Homo sapiens GN=RPS26 PE=1 SV=3;sp|Q5JNZ5|RS26L_HUMAN Putative 40S ribosomal protein S26-like 1 OS=Homo sapiens GN=RPS26P11 PE=5 SV=1	2	2	2	2	0	0	0	1	2	2	0	0	0	1	2	2	0	0	0	1	2	2	20.9	20.9	20.9	13.015	115	115;115	0	16.095	0	0	0	7.8	20.9
sp|Q8N8A6|DDX51_HUMAN	sp|Q8N8A6|DDX51_HUMAN	1	16211000	13381000	1	1	1	1	16211000	13381000	8	8	8	sp|Q8N8A6|DDX51_HUMAN ATP-dependent RNA helicase DDX51 OS=Homo sapiens GN=DDX51 PE=1 SV=3	1	8	8	8	0	0	0	0	8	5	0	0	0	0	8	5	0	0	0	0	8	5	18	18	18	72.456	666	666	0	55.799	0	0	0	0	18
sp|Q4VCS5|AMOT_HUMAN;tr|E7ERM3|E7ERM3_HUMAN;tr|A6NP16|A6NP16_HUMAN;sp|Q8IY63|AMOL1_HUMAN	sp|Q4VCS5|AMOT_HUMAN;tr|E7ERM3|E7ERM3_HUMAN;tr|A6NP16|A6NP16_HUMAN	3.10791	13649000	13136000	26708000	1	1	83006000	13649000	13136000	23;15;13;1	23;15;13;1	23;15;13;1	sp|Q4VCS5|AMOT_HUMAN Angiomotin OS=Homo sapiens GN=AMOT PE=1 SV=1;tr|E7ERM3|E7ERM3_HUMAN Angiomotin OS=Homo sapiens GN=AMOT PE=1 SV=1;tr|A6NP16|A6NP16_HUMAN Angiomotin OS=Homo sapiens GN=AMOT PE=1 SV=1	4	23	23	23	12	0	0	21	6	5	12	0	0	21	6	5	12	0	0	21	6	5	25.5	25.5	25.5	118.08	1084	1084;852;1161;956	0	166.99	15.4	0	0	22.3	9.5
sp|Q9H0A0|NAT10_HUMAN;tr|A0A087WV29|A0A087WV29_HUMAN;tr|E9PMU0|E9PMU0_HUMAN;tr|E9PJN6|E9PJN6_HUMAN	sp|Q9H0A0|NAT10_HUMAN;tr|A0A087WV29|A0A087WV29_HUMAN	1	20028000	12884000	1	1	1	1	20028000	12884000	9;7;3;2	9;7;3;2	9;7;3;2	sp|Q9H0A0|NAT10_HUMAN N-acetyltransferase 10 OS=Homo sapiens GN=NAT10 PE=1 SV=2;tr|A0A087WV29|A0A087WV29_HUMAN N-acetyltransferase 10 OS=Homo sapiens GN=NAT10 PE=1 SV=1	4	9	9	9	0	0	0	0	8	5	0	0	0	0	8	5	0	0	0	0	8	5	10.6	10.6	10.6	115.73	1025	1025;834;288;146	0	60.96	0	0	0	0	9.6
tr|A0A0A0MRW6|A0A0A0MRW6_HUMAN;sp|Q9H6R4|NOL6_HUMAN	tr|A0A0A0MRW6|A0A0A0MRW6_HUMAN;sp|Q9H6R4|NOL6_HUMAN	1	3658100	12738000	1	1	1	1	3658100	12738000	5;5	5;5	5;5	tr|A0A0A0MRW6|A0A0A0MRW6_HUMAN Nucleolar protein 6 OS=Homo sapiens GN=NOL6 PE=1 SV=1;sp|Q9H6R4|NOL6_HUMAN Nucleolar protein 6 OS=Homo sapiens GN=NOL6 PE=1 SV=2	2	5	5	5	0	0	0	0	4	3	0	0	0	0	4	3	0	0	0	0	4	3	5.4	5.4	5.4	112.16	1008	1008;1146	0	33.461	0	0	0	0	5.3
sp|O60264|SMCA5_HUMAN	sp|O60264|SMCA5_HUMAN	1	12385000	12685000	1	1	1	1	12385000	12685000	6	6	5	sp|O60264|SMCA5_HUMAN SWI/SNF-related matrix-associated actin-dependent regulator of chromatin subfamily A member 5 OS=Homo sapiens GN=SMARCA5 PE=1 SV=1	1	6	6	5	0	0	0	0	6	3	0	0	0	0	6	3	0	0	0	0	5	3	7.2	7.2	6.1	121.9	1052	1052	0	39.554	0	0	0	0	7.2
sp|Q9H8H0|NOL11_HUMAN;tr|J3QLQ6|J3QLQ6_HUMAN;tr|J3QR28|J3QR28_HUMAN;tr|J3QKV1|J3QKV1_HUMAN	sp|Q9H8H0|NOL11_HUMAN;tr|J3QLQ6|J3QLQ6_HUMAN;tr|J3QR28|J3QR28_HUMAN	1	20038000	12654000	1	1	1	1	20038000	12654000	7;4;4;1	7;4;4;1	7;4;4;1	sp|Q9H8H0|NOL11_HUMAN Nucleolar protein 11 OS=Homo sapiens GN=NOL11 PE=1 SV=1;tr|J3QLQ6|J3QLQ6_HUMAN Nucleolar protein 11 (Fragment) OS=Homo sapiens GN=NOL11 PE=1 SV=1;tr|J3QR28|J3QR28_HUMAN Nucleolar protein 11 (Fragment) OS=Homo sapiens GN=NOL11 PE=1 SV=	4	7	7	7	0	0	0	0	6	4	0	0	0	0	6	4	0	0	0	0	6	4	13.1	13.1	13.1	81.123	719	719;189;271;231	0	51.041	0	0	0	0	12.1
REV__sp|Q9NZJ4|SACS_HUMAN	REV__sp|Q9NZJ4|SACS_HUMAN	1	1	12051000	1	1	1	1	1	12051000	2	2	2	sp|Q9NZJ4|SACS_HUMAN Sacsin OS=Homo sapiens GN=SACS PE=1 SV=2	1	2	2	2	1	0	0	1	0	1	1	0	0	1	0	1	1	0	0	1	0	1	0	0	0	521.12	4579	4579	0.0016502	10.894	0	0	0	0	0
sp|Q5BKZ1|ZN326_HUMAN;tr|A0A0A0MRN4|A0A0A0MRN4_HUMAN	sp|Q5BKZ1|ZN326_HUMAN	1	18785000	11970000	1	1	1	1	18785000	11970000	3;1	3;1	3;1	sp|Q5BKZ1|ZN326_HUMAN DBIRD complex subunit ZNF326 OS=Homo sapiens GN=ZNF326 PE=1 SV=2	2	3	3	3	0	0	0	1	3	3	0	0	0	1	3	3	0	0	0	1	3	3	8.2	8.2	8.2	65.653	582	582;493	0	25.695	0	0	0	2.7	8.2
sp|Q7Z2W4|ZCCHV_HUMAN;tr|C9J6P4|C9J6P4_HUMAN;tr|H7C5K1|H7C5K1_HUMAN	sp|Q7Z2W4|ZCCHV_HUMAN;tr|C9J6P4|C9J6P4_HUMAN	1	9170000	11838000	1	1	1	1	9170000	11838000	6;5;1	6;5;1	6;5;1	sp|Q7Z2W4|ZCCHV_HUMAN Zinc finger CCCH-type antiviral protein 1 OS=Homo sapiens GN=ZC3HAV1 PE=1 SV=3;tr|C9J6P4|C9J6P4_HUMAN Zinc finger CCCH-type antiviral protein 1 OS=Homo sapiens GN=ZC3HAV1 PE=1 SV=1	3	6	6	6	0	0	0	0	6	4	0	0	0	0	6	4	0	0	0	0	6	4	11.5	11.5	11.5	101.43	902	902;1024;264	0	49.459	0	0	0	0	11.5
sp|Q9Y230|RUVB2_HUMAN;tr|M0R0Y3|M0R0Y3_HUMAN;tr|X6R2L4|X6R2L4_HUMAN;tr|M0QXI6|M0QXI6_HUMAN;tr|M0R0Z0|M0R0Z0_HUMAN	sp|Q9Y230|RUVB2_HUMAN;tr|M0R0Y3|M0R0Y3_HUMAN;tr|X6R2L4|X6R2L4_HUMAN	0.816418	10530000	11705000	13656000	1	1	11149000	10530000	11705000	8;7;4;2;1	8;7;4;2;1	8;7;4;2;1	sp|Q9Y230|RUVB2_HUMAN RuvB-like 2 OS=Homo sapiens GN=RUVBL2 PE=1 SV=3;tr|M0R0Y3|M0R0Y3_HUMAN RuvB-like 2 OS=Homo sapiens GN=RUVBL2 PE=1 SV=1;tr|X6R2L4|X6R2L4_HUMAN RuvB-like 2 OS=Homo sapiens GN=RUVBL2 PE=1 SV=1	5	8	8	8	7	1	1	6	6	4	7	1	1	6	6	4	7	1	1	6	6	4	23.3	23.3	23.3	51.156	463	463;354;259;109;50	0	55.896	21.2	3.5	2.6	16.2	17.1
sp|Q13868|EXOS2_HUMAN;tr|A3KFL1|A3KFL1_HUMAN;tr|A3KFL5|A3KFL5_HUMAN;tr|A3KFL2|A3KFL2_HUMAN	sp|Q13868|EXOS2_HUMAN;tr|A3KFL1|A3KFL1_HUMAN;tr|A3KFL5|A3KFL5_HUMAN;tr|A3KFL2|A3KFL2_HUMAN	1	1	11702000	1	1	1	1	1	11702000	3;2;2;2	3;2;2;2	3;2;2;2	sp|Q13868|EXOS2_HUMAN Exosome complex component RRP4 OS=Homo sapiens GN=EXOSC2 PE=1 SV=2;tr|A3KFL1|A3KFL1_HUMAN Exosome complex component RRP4 (Fragment) OS=Homo sapiens GN=EXOSC2 PE=1 SV=1;tr|A3KFL5|A3KFL5_HUMAN Exosome complex component RRP4 (Fragment) O	4	3	3	3	0	0	0	0	2	2	0	0	0	0	2	2	0	0	0	0	2	2	13	13	13	32.789	293	293;200;237;285	0	31.098	0	0	0	0	9.2
sp|P62995|TRA2B_HUMAN;tr|H7BXF3|H7BXF3_HUMAN;tr|H7C2L4|H7C2L4_HUMAN	sp|P62995|TRA2B_HUMAN;tr|H7BXF3|H7BXF3_HUMAN;tr|H7C2L4|H7C2L4_HUMAN	1.1055	23940000	11673000	8219000	1	1	9086100	23940000	11673000	6;4;3	6;4;3	5;3;3	sp|P62995|TRA2B_HUMAN Transformer-2 protein homolog beta OS=Homo sapiens GN=TRA2B PE=1 SV=1;tr|H7BXF3|H7BXF3_HUMAN Transformer-2 protein homolog beta (Fragment) OS=Homo sapiens GN=TRA2B PE=1 SV=1;tr|H7C2L4|H7C2L4_HUMAN Transformer-2 protein homolog beta (F	3	6	6	5	2	1	0	4	5	4	2	1	0	4	5	4	2	1	0	4	4	3	24	24	20.5	33.665	288	288;127;107	0	52.321	9	5.6	0	17.4	20.5
tr|D6RG13|D6RG13_HUMAN;sp|P61247|RS3A_HUMAN;tr|H0Y9Y4|H0Y9Y4_HUMAN;tr|D6R9B6|D6R9B6_HUMAN;tr|D6RB09|D6RB09_HUMAN;tr|E9PFI5|E9PFI5_HUMAN;tr|D6RAT0|D6RAT0_HUMAN;tr|D6RI02|D6RI02_HUMAN;tr|H0Y8L7|H0Y8L7_HUMAN	tr|D6RG13|D6RG13_HUMAN;sp|P61247|RS3A_HUMAN;tr|H0Y9Y4|H0Y9Y4_HUMAN;tr|D6R9B6|D6R9B6_HUMAN;tr|D6RB09|D6RB09_HUMAN;tr|E9PFI5|E9PFI5_HUMAN;tr|D6RAT0|D6RAT0_HUMAN	1	8334800	11618000	1	1	1	1	8334800	11618000	3;3;3;2;2;2;2;1;1	3;3;3;2;2;2;2;1;1	3;3;3;2;2;2;2;1;1	tr|D6RG13|D6RG13_HUMAN 40S ribosomal protein S3a (Fragment) OS=Homo sapiens GN=RPS3A PE=1 SV=1;sp|P61247|RS3A_HUMAN 40S ribosomal protein S3a OS=Homo sapiens GN=RPS3A PE=1 SV=2;tr|H0Y9Y4|H0Y9Y4_HUMAN 40S ribosomal protein S3a (Fragment) OS=Homo sapiens GN=	9	3	3	3	0	0	0	0	3	2	0	0	0	0	3	2	0	0	0	0	3	2	14.8	14.8	14.8	25.608	223	223;264;470;145;194;410;816;95;190	0	19.432	0	0	0	0	14.8
sp|P51116|FXR2_HUMAN	sp|P51116|FXR2_HUMAN	1	11810000	11515000	1	1	1	1	11810000	11515000	7	5	4	sp|P51116|FXR2_HUMAN Fragile X mental retardation syndrome-related protein 2 OS=Homo sapiens GN=FXR2 PE=1 SV=2	1	7	5	4	0	0	0	0	5	5	0	0	0	0	4	4	0	0	0	0	3	3	14.7	12.3	9.5	74.222	673	673	0	54.189	0	0	0	0	11.6
sp|Q71UI9|H2AV_HUMAN;sp|P0C0S5|H2AZ_HUMAN;tr|C9J0D1|C9J0D1_HUMAN;tr|C9J386|C9J386_HUMAN	sp|Q71UI9|H2AV_HUMAN;sp|P0C0S5|H2AZ_HUMAN;tr|C9J0D1|C9J0D1_HUMAN;tr|C9J386|C9J386_HUMAN	4187400	6637600	11333000	1	1	1	4187400	6637600	11333000	4;4;3;2	2;2;1;1	2;2;1;1	sp|Q71UI9|H2AV_HUMAN Histone H2A.V OS=Homo sapiens GN=H2AFV PE=1 SV=3;sp|P0C0S5|H2AZ_HUMAN Histone H2A.Z OS=Homo sapiens GN=H2AFZ PE=1 SV=2;tr|C9J0D1|C9J0D1_HUMAN Histone H2A OS=Homo sapiens GN=H2AFV PE=3 SV=1;tr|C9J386|C9J386_HUMAN Histone H2A OS=Homo sap	4	4	2	2	1	1	1	3	3	4	0	0	0	2	2	2	0	0	0	2	2	2	31.2	18.8	18.8	13.509	128	128;128;122;76	0	15.266	7	7	7	25.8	25.8
sp|Q9Y224|CN166_HUMAN;tr|H0YJB9|H0YJB9_HUMAN;tr|G3V4C6|G3V4C6_HUMAN	sp|Q9Y224|CN166_HUMAN;tr|H0YJB9|H0YJB9_HUMAN;tr|G3V4C6|G3V4C6_HUMAN	1	17754000	11194000	1	1	1	1	17754000	11194000	2;1;1	2;1;1	2;1;1	sp|Q9Y224|CN166_HUMAN UPF0568 protein C14orf166 OS=Homo sapiens GN=C14orf166 PE=1 SV=1;tr|H0YJB9|H0YJB9_HUMAN UPF0568 protein C14orf166 (Fragment) OS=Homo sapiens GN=C14orf166 PE=1 SV=1;tr|G3V4C6|G3V4C6_HUMAN UPF0568 protein C14orf166 OS=Homo sapiens GN=C1	3	2	2	2	0	0	0	0	2	2	0	0	0	0	2	2	0	0	0	0	2	2	9.8	9.8	9.8	28.068	244	244;129;193	0	14.821	0	0	0	0	9.8
sp|P52907|CAZA1_HUMAN;tr|C9JUG7|C9JUG7_HUMAN;tr|F8W9N7|F8W9N7_HUMAN;tr|A0A0D9SET8|A0A0D9SET8_HUMAN	sp|P52907|CAZA1_HUMAN	0.201482	0.8199	11059000	43722000	9490300	1	8809200	7781100	11059000	6;1;1;1	6;1;1;1	5;0;0;0	sp|P52907|CAZA1_HUMAN F-actin-capping protein subunit alpha-1 OS=Homo sapiens GN=CAPZA1 PE=1 SV=3	4	6	6	5	6	2	0	3	2	3	6	2	0	3	2	3	5	1	0	3	1	2	32.5	32.5	29	32.922	286	286;146;174;174	0	49.655	32.5	9.8	0	18.5	8.7
sp|Q9P0M6|H2AW_HUMAN;tr|Q5SQT3|Q5SQT3_HUMAN	sp|Q9P0M6|H2AW_HUMAN;tr|Q5SQT3|Q5SQT3_HUMAN	1	12379000	10925000	1	1	1	1	12379000	10925000	7;4	7;4	6;3	sp|Q9P0M6|H2AW_HUMAN Core histone macro-H2A.2 OS=Homo sapiens GN=H2AFY2 PE=1 SV=3;tr|Q5SQT3|Q5SQT3_HUMAN Histone H2A (Fragment) OS=Homo sapiens GN=H2AFY2 PE=1 SV=5	2	7	7	6	0	0	0	0	5	7	0	0	0	0	5	7	0	0	0	0	5	6	28.5	28.5	26.1	40.058	372	372;474	0	44.664	0	0	0	0	19.1
sp|Q13573|SNW1_HUMAN;tr|G3V3A4|G3V3A4_HUMAN;tr|G3V4X8|G3V4X8_HUMAN;tr|G3V5R3|G3V5R3_HUMAN	sp|Q13573|SNW1_HUMAN;tr|G3V3A4|G3V3A4_HUMAN;tr|G3V4X8|G3V4X8_HUMAN	2.6527	22877000	10678000	5332300	1	1	14145000	22877000	10678000	9;8;7;3	9;8;7;3	9;8;7;3	sp|Q13573|SNW1_HUMAN SNW domain-containing protein 1 OS=Homo sapiens GN=SNW1 PE=1 SV=1;tr|G3V3A4|G3V3A4_HUMAN SNW domain-containing protein 1 OS=Homo sapiens GN=SNW1 PE=1 SV=1;tr|G3V4X8|G3V4X8_HUMAN SNW domain-containing protein 1 OS=Homo sapiens GN=SNW1 P	4	9	9	9	3	0	0	5	7	5	3	0	0	5	7	5	3	0	0	5	7	5	22.8	22.8	22.8	61.494	536	536;571;374;185	0	74.584	5.8	0	0	12.5	19.2
sp|Q09161|NCBP1_HUMAN	sp|Q09161|NCBP1_HUMAN	10036000	12323000	10436000	1	1	1	10036000	12323000	10436000	8	8	8	sp|Q09161|NCBP1_HUMAN Nuclear cap-binding protein subunit 1 OS=Homo sapiens GN=NCBP1 PE=1 SV=1	1	8	8	8	2	0	0	3	6	4	2	0	0	3	6	4	2	0	0	3	6	4	13.5	13.5	13.5	91.838	790	790	0	56.173	2.7	0	0	4.6	10.9
sp|Q8IXT5|RB12B_HUMAN;tr|B9ZVT1|B9ZVT1_HUMAN;tr|E5RJW8|E5RJW8_HUMAN;tr|E5RHG1|E5RHG1_HUMAN;tr|E5RJ83|E5RJ83_HUMAN;tr|E5RJV8|E5RJV8_HUMAN	sp|Q8IXT5|RB12B_HUMAN;tr|B9ZVT1|B9ZVT1_HUMAN	3736900	14022000	10179000	1	1	1	3736900	14022000	10179000	7;6;1;1;1;1	7;6;1;1;1;1	7;6;1;1;1;1	sp|Q8IXT5|RB12B_HUMAN RNA-binding protein 12B OS=Homo sapiens GN=RBM12B PE=1 SV=2;tr|B9ZVT1|B9ZVT1_HUMAN RNA-binding protein 12B OS=Homo sapiens GN=RBM12B PE=1 SV=2	6	7	7	7	0	0	0	2	7	3	0	0	0	2	7	3	0	0	0	2	7	3	8.2	8.2	8.2	118.1	1001	1001;881;82;122;143;149	0	43.763	0	0	0	1.8	8.2
tr|K7ENG2|K7ENG2_HUMAN;sp|P26368|U2AF2_HUMAN	tr|K7ENG2|K7ENG2_HUMAN;sp|P26368|U2AF2_HUMAN	1	9771800	10084000	1	1	1	1	9771800	10084000	4;4	4;4	4;4	tr|K7ENG2|K7ENG2_HUMAN Splicing factor U2AF 65 kDa subunit OS=Homo sapiens GN=U2AF2 PE=1 SV=1;sp|P26368|U2AF2_HUMAN Splicing factor U2AF 65 kDa subunit OS=Homo sapiens GN=U2AF2 PE=1 SV=4	2	4	4	4	0	0	0	0	4	2	0	0	0	0	4	2	0	0	0	0	4	2	17.9	17.9	17.9	33.901	307	307;475	0	26.684	0	0	0	0	17.9
sp|Q13123|RED_HUMAN;tr|D6REL4|D6REL4_HUMAN;tr|Q9H4P6|Q9H4P6_HUMAN;tr|E7EQZ7|E7EQZ7_HUMAN	sp|Q13123|RED_HUMAN;tr|D6REL4|D6REL4_HUMAN;tr|Q9H4P6|Q9H4P6_HUMAN;tr|E7EQZ7|E7EQZ7_HUMAN	1	1	10052000	1	1	1	1	1	10052000	2;1;1;1	2;1;1;1	2;1;1;1	sp|Q13123|RED_HUMAN Protein Red OS=Homo sapiens GN=IK PE=1 SV=3;tr|D6REL4|D6REL4_HUMAN Protein Red (Fragment) OS=Homo sapiens GN=IK PE=1 SV=5;tr|Q9H4P6|Q9H4P6_HUMAN Clone TCCCIA00142 mRNA sequence OS=Homo sapiens GN=IK PE=1 SV=1;tr|E7EQZ7|E7EQZ7_HUMAN Prot	4	2	2	2	0	0	0	0	1	2	0	0	0	0	1	2	0	0	0	0	1	2	3.2	3.2	3.2	65.601	557	557;213;240;267	0	13.644	0	0	0	0	1.6
sp|Q5RKV6|EXOS6_HUMAN	sp|Q5RKV6|EXOS6_HUMAN	1	10019000	9962600	1	1	1	1	10019000	9962600	4	4	4	sp|Q5RKV6|EXOS6_HUMAN Exosome complex component MTR3 OS=Homo sapiens GN=EXOSC6 PE=1 SV=1	1	4	4	4	0	0	0	0	4	4	0	0	0	0	4	4	0	0	0	0	4	4	19.9	19.9	19.9	28.235	272	272	0	30.653	0	0	0	0	19.9
tr|M0QXS5|M0QXS5_HUMAN;sp|P14866|HNRPL_HUMAN;tr|M0QYT0|M0QYT0_HUMAN;tr|M0R076|M0R076_HUMAN;tr|M0QYL7|M0QYL7_HUMAN;tr|M0R1W6|M0R1W6_HUMAN	tr|M0QXS5|M0QXS5_HUMAN;sp|P14866|HNRPL_HUMAN;tr|M0QYT0|M0QYT0_HUMAN	28184000	13520000	9747800	1	1	1	28184000	13520000	9747800	6;6;3;1;1;1	6;6;3;1;1;1	6;6;3;1;1;1	tr|M0QXS5|M0QXS5_HUMAN Heterogeneous nuclear ribonucleoprotein L (Fragment) OS=Homo sapiens GN=HNRNPL PE=1 SV=1;sp|P14866|HNRPL_HUMAN Heterogeneous nuclear ribonucleoprotein L OS=Homo sapiens GN=HNRNPL PE=1 SV=2;tr|M0QYT0|M0QYT0_HUMAN Uncharacterized prote	6	6	6	6	1	1	0	2	5	5	1	1	0	2	5	5	1	1	0	2	5	5	17.9	17.9	17.9	58.362	530	530;589;321;114;198;220	0	47.221	1.9	2.6	0	4	15.8
sp|Q9NUD5|ZCHC3_HUMAN	sp|Q9NUD5|ZCHC3_HUMAN	1	11672000	9695000	1	1	1	1	11672000	9695000	4	4	4	sp|Q9NUD5|ZCHC3_HUMAN Zinc finger CCHC domain-containing protein 3 OS=Homo sapiens GN=ZCCHC3 PE=1 SV=1	1	4	4	4	0	0	0	0	4	2	0	0	0	0	4	2	0	0	0	0	4	2	11.6	11.6	11.6	43.618	404	404	0	26.68	0	0	0	0	11.6
tr|J3QLW7|J3QLW7_HUMAN;sp|Q9Y221|NIP7_HUMAN;tr|J3QRD6|J3QRD6_HUMAN;tr|J3QRR4|J3QRR4_HUMAN	tr|J3QLW7|J3QLW7_HUMAN;sp|Q9Y221|NIP7_HUMAN;tr|J3QRD6|J3QRD6_HUMAN;tr|J3QRR4|J3QRR4_HUMAN	1	1	9672800	1	1	1	1	1	9672800	2;2;1;1	2;2;1;1	2;2;1;1	tr|J3QLW7|J3QLW7_HUMAN 60S ribosome subunit biogenesis protein NIP7 homolog OS=Homo sapiens GN=NIP7 PE=1 SV=1;sp|Q9Y221|NIP7_HUMAN 60S ribosome subunit biogenesis protein NIP7 homolog OS=Homo sapiens GN=NIP7 PE=1 SV=1;tr|J3QRD6|J3QRD6_HUMAN 60S ribosome su	4	2	2	2	0	0	0	0	1	2	0	0	0	0	1	2	0	0	0	0	1	2	21.8	21.8	21.8	12.453	110	110;180;70;79	0	15.124	0	0	0	0	12.7
tr|E9PLA9|E9PLA9_HUMAN;sp|Q14444|CAPR1_HUMAN;tr|G3V153|G3V153_HUMAN;tr|A0A087X082|A0A087X082_HUMAN	tr|E9PLA9|E9PLA9_HUMAN;sp|Q14444|CAPR1_HUMAN;tr|G3V153|G3V153_HUMAN;tr|A0A087X082|A0A087X082_HUMAN	1	7679000	9658100	1	1	1	1	7679000	9658100	4;4;3;3	4;4;3;3	4;4;3;3	tr|E9PLA9|E9PLA9_HUMAN Caprin-1 (Fragment) OS=Homo sapiens GN=CAPRIN1 PE=1 SV=1;sp|Q14444|CAPR1_HUMAN Caprin-1 OS=Homo sapiens GN=CAPRIN1 PE=1 SV=2;tr|G3V153|G3V153_HUMAN Caprin-1 OS=Homo sapiens GN=CAPRIN1 PE=1 SV=1;tr|A0A087X082|A0A087X082_HUMAN Caprin-1	4	4	4	4	0	0	0	0	4	3	0	0	0	0	4	3	0	0	0	0	4	3	40.9	40.9	40.9	20.236	186	186;709;628;649	0	27.649	0	0	0	0	40.9
sp|O43818|U3IP2_HUMAN	sp|O43818|U3IP2_HUMAN	1	13238000	9622100	1	1	1	1	13238000	9622100	7	7	7	sp|O43818|U3IP2_HUMAN U3 small nucleolar RNA-interacting protein 2 OS=Homo sapiens GN=RRP9 PE=1 SV=1	1	7	7	7	0	0	0	0	6	3	0	0	0	0	6	3	0	0	0	0	6	3	16.8	16.8	16.8	51.84	475	475	0	44.113	0	0	0	0	14.9
sp|Q8N9T8|KRI1_HUMAN;tr|H0YFD2|H0YFD2_HUMAN;tr|F8WFC1|F8WFC1_HUMAN	sp|Q8N9T8|KRI1_HUMAN	1	9124800	9570200	1	1	1	1	9124800	9570200	5;2;2	5;2;2	5;2;2	sp|Q8N9T8|KRI1_HUMAN Protein KRI1 homolog OS=Homo sapiens GN=KRI1 PE=1 SV=3	3	5	5	5	0	0	0	0	3	4	0	0	0	0	3	4	0	0	0	0	3	4	9.5	9.5	9.5	82.597	703	703;190;197	0	36.012	0	0	0	0	6.5
sp|O00566|MPP10_HUMAN;tr|U3KQ48|U3KQ48_HUMAN	sp|O00566|MPP10_HUMAN;tr|U3KQ48|U3KQ48_HUMAN	1	15478000	9495600	1	1	1	1	15478000	9495600	8;4	8;4	8;4	sp|O00566|MPP10_HUMAN U3 small nucleolar ribonucleoprotein protein MPP10 OS=Homo sapiens GN=MPHOSPH10 PE=1 SV=2;tr|U3KQ48|U3KQ48_HUMAN U3 small nucleolar ribonucleoprotein protein MPP10 OS=Homo sapiens GN=MPHOSPH10 PE=1 SV=1	2	8	8	8	0	0	0	0	6	5	0	0	0	0	6	5	0	0	0	0	6	5	17.3	17.3	17.3	78.863	681	681;462	0	57.411	0	0	0	0	13.2
sp|Q9UN86|G3BP2_HUMAN;tr|D6RAC7|D6RAC7_HUMAN;tr|D6RB17|D6RB17_HUMAN;tr|D6RGJ4|D6RGJ4_HUMAN	sp|Q9UN86|G3BP2_HUMAN;tr|D6RAC7|D6RAC7_HUMAN;tr|D6RB17|D6RB17_HUMAN;tr|D6RGJ4|D6RGJ4_HUMAN	1	9385500	9331300	1	1	1	1	9385500	9331300	6;4;4;3	5;3;3;2	5;3;3;2	sp|Q9UN86|G3BP2_HUMAN Ras GTPase-activating protein-binding protein 2 OS=Homo sapiens GN=G3BP2 PE=1 SV=2;tr|D6RAC7|D6RAC7_HUMAN Ras GTPase-activating protein-binding protein 2 (Fragment) OS=Homo sapiens GN=G3BP2 PE=1 SV=1;tr|D6RB17|D6RB17_HUMAN Ras GTPase-	4	6	5	5	0	0	0	0	4	6	0	0	0	0	4	5	0	0	0	0	4	5	6.8	5.6	5.6	108.74	999	999;141;198;125	0	54.703	0	0	0	0	4.3
tr|F8W6I7|F8W6I7_HUMAN;sp|P09651|ROA1_HUMAN;tr|F8VTQ5|F8VTQ5_HUMAN;tr|F8VZ49|F8VZ49_HUMAN;sp|Q32P51|RA1L2_HUMAN;tr|H0YH80|H0YH80_HUMAN;tr|F8VYN5|F8VYN5_HUMAN;tr|F8W646|F8W646_HUMAN	tr|F8W6I7|F8W6I7_HUMAN;sp|P09651|ROA1_HUMAN;tr|F8VTQ5|F8VTQ5_HUMAN;tr|F8VZ49|F8VZ49_HUMAN;sp|Q32P51|RA1L2_HUMAN;tr|H0YH80|H0YH80_HUMAN	2.21135	8214900	9306400	2098400	1	1	4640300	8214900	9306400	4;4;3;3;3;3;1;1	4;4;3;3;3;3;1;1	4;4;3;3;3;3;1;1	tr|F8W6I7|F8W6I7_HUMAN Heterogeneous nuclear ribonucleoprotein A1 OS=Homo sapiens GN=HNRNPA1 PE=1 SV=2;sp|P09651|ROA1_HUMAN Heterogeneous nuclear ribonucleoprotein A1 OS=Homo sapiens GN=HNRNPA1 PE=1 SV=5;tr|F8VTQ5|F8VTQ5_HUMAN Heterogeneous nuclear ribonuc	8	4	4	4	3	0	0	2	4	2	3	0	0	2	4	2	3	0	0	2	4	2	18.6	18.6	18.6	33.155	307	307;372;145;231;320;562;113;156	0	31.71	13.7	0	0	8.1	18.6
sp|Q6RFH5|WDR74_HUMAN;tr|E9PS41|E9PS41_HUMAN;tr|H0YFP2|H0YFP2_HUMAN	sp|Q6RFH5|WDR74_HUMAN;tr|E9PS41|E9PS41_HUMAN;tr|H0YFP2|H0YFP2_HUMAN	1	9214300	9278200	1	1	1	1	9214300	9278200	4;4;2	4;4;2	4;4;2	sp|Q6RFH5|WDR74_HUMAN WD repeat-containing protein 74 OS=Homo sapiens GN=WDR74 PE=1 SV=1;tr|E9PS41|E9PS41_HUMAN WD repeat-containing protein 74 OS=Homo sapiens GN=WDR74 PE=1 SV=1;tr|H0YFP2|H0YFP2_HUMAN WD repeat-containing protein 74 (Fragment) OS=Homo sap	3	4	4	4	0	0	0	0	3	4	0	0	0	0	3	4	0	0	0	0	3	4	10.6	10.6	10.6	42.441	385	385;328;38	0	37.144	0	0	0	0	10.4
sp|Q07955|SRSF1_HUMAN;tr|J3KTL2|J3KTL2_HUMAN;tr|J3KSR8|J3KSR8_HUMAN;tr|J3QQV5|J3QQV5_HUMAN;tr|J3KSW7|J3KSW7_HUMAN	sp|Q07955|SRSF1_HUMAN;tr|J3KTL2|J3KTL2_HUMAN;tr|J3KSR8|J3KSR8_HUMAN	1	10239000	9264100	1	1	1	1	10239000	9264100	6;6;3;2;2	5;5;3;2;2	5;5;3;2;2	sp|Q07955|SRSF1_HUMAN Serine/arginine-rich splicing factor 1 OS=Homo sapiens GN=SRSF1 PE=1 SV=2;tr|J3KTL2|J3KTL2_HUMAN Serine/arginine-rich-splicing factor 1 OS=Homo sapiens GN=SRSF1 PE=1 SV=1;tr|J3KSR8|J3KSR8_HUMAN Serine/arginine-rich-splicing factor 1 (	5	6	5	5	0	0	0	1	4	5	0	0	0	1	3	4	0	0	0	1	3	4	27.4	24.6	24.6	27.744	248	248;253;143;65;73	0	31.657	0	0	0	4	19
sp|Q9BWF3|RBM4_HUMAN;tr|E9PLB0|E9PLB0_HUMAN;tr|E9PM61|E9PM61_HUMAN;tr|D6R9K7|D6R9K7_HUMAN;tr|U3KQD5|U3KQD5_HUMAN;tr|J3QRR5|J3QRR5_HUMAN;tr|E9PB51|E9PB51_HUMAN;sp|Q9BQ04|RBM4B_HUMAN	sp|Q9BWF3|RBM4_HUMAN;tr|E9PLB0|E9PLB0_HUMAN;tr|E9PM61|E9PM61_HUMAN;tr|D6R9K7|D6R9K7_HUMAN;tr|U3KQD5|U3KQD5_HUMAN;tr|J3QRR5|J3QRR5_HUMAN;tr|E9PB51|E9PB51_HUMAN;sp|Q9BQ04|RBM4B_HUMAN	1	10807000	9210000	1	1	1	1	10807000	9210000	3;2;2;2;2;2;2;2	3;2;2;2;2;2;2;2	3;2;2;2;2;2;2;2	sp|Q9BWF3|RBM4_HUMAN RNA-binding protein 4 OS=Homo sapiens GN=RBM4 PE=1 SV=1;tr|E9PLB0|E9PLB0_HUMAN RNA-binding protein 4B OS=Homo sapiens GN=RBM4B PE=1 SV=1;tr|E9PM61|E9PM61_HUMAN RNA-binding protein 4B OS=Homo sapiens GN=RBM4B PE=1 SV=1;tr|D6R9K7|D6R9K7_	8	3	3	3	0	0	0	0	2	3	0	0	0	0	2	3	0	0	0	0	2	3	9.9	9.9	9.9	40.313	364	364;143;147;150;151;155;240;359	0	28.445	0	0	0	0	6.6
sp|Q9Y3A4|RRP7A_HUMAN	sp|Q9Y3A4|RRP7A_HUMAN	1	9411400	9206300	1	1	1	1	9411400	9206300	4	4	4	sp|Q9Y3A4|RRP7A_HUMAN Ribosomal RNA-processing protein 7 homolog A OS=Homo sapiens GN=RRP7A PE=1 SV=2	1	4	4	4	0	0	0	0	4	3	0	0	0	0	4	3	0	0	0	0	4	3	15.7	15.7	15.7	32.334	280	280	0	24.872	0	0	0	0	15.7
sp|P11388|TOP2A_HUMAN	sp|P11388|TOP2A_HUMAN	1	4877800	9181400	1	1	1	1	4877800	9181400	5	5	3	sp|P11388|TOP2A_HUMAN DNA topoisomerase 2-alpha OS=Homo sapiens GN=TOP2A PE=1 SV=3	1	5	5	3	1	1	0	2	4	3	1	1	0	2	4	3	0	0	0	0	3	2	4	4	2.5	174.38	1531	1531	0	35.635	0.8	0.8	0	1.5	3.4
sp|Q9BRX2|PELO_HUMAN;tr|Q5STX8|Q5STX8_HUMAN;tr|C9IZE6|C9IZE6_HUMAN;tr|I3L492|I3L492_HUMAN;tr|H3BPL0|H3BPL0_HUMAN	sp|Q9BRX2|PELO_HUMAN;tr|Q5STX8|Q5STX8_HUMAN;tr|C9IZE6|C9IZE6_HUMAN	1	9732300	9133500	1	1	1	1	9732300	9133500	5;4;3;2;1	5;4;3;2;1	5;4;3;2;1	sp|Q9BRX2|PELO_HUMAN Protein pelota homolog OS=Homo sapiens GN=PELO PE=1 SV=2;tr|Q5STX8|Q5STX8_HUMAN Allograft inflammatory factor 1 (Fragment) OS=Homo sapiens GN=AIF1 PE=1 SV=1;tr|C9IZE6|C9IZE6_HUMAN Nectin-3 (Fragment) OS=Homo sapiens GN=PVRL3 PE=4 SV=1	5	5	5	5	1	0	0	1	3	4	1	0	0	1	3	4	1	0	0	1	3	4	4	4	4	172.22	1614	1614;2116;1023;619;455	0	32.583	0.7	0	0	0.7	2.5
sp|Q96PK6|RBM14_HUMAN	sp|Q96PK6|RBM14_HUMAN	1	8469900	8901100	1	1	1	1	8469900	8901100	6	6	6	sp|Q96PK6|RBM14_HUMAN RNA-binding protein 14 OS=Homo sapiens GN=RBM14 PE=1 SV=2	1	6	6	6	0	0	0	1	5	5	0	0	0	1	5	5	0	0	0	1	5	5	11.8	11.8	11.8	69.491	669	669	0	41.773	0	0	0	3.6	10.5
sp|P31689|DNJA1_HUMAN	sp|P31689|DNJA1_HUMAN	1	7423500	8855100	1	1	1	1	7423500	8855100	4	4	4	sp|P31689|DNJA1_HUMAN DnaJ homolog subfamily A member 1 OS=Homo sapiens GN=DNAJA1 PE=1 SV=2	1	4	4	4	0	0	0	0	3	3	0	0	0	0	3	3	0	0	0	0	3	3	13.4	13.4	13.4	44.868	397	397	0	26.301	0	0	0	0	11.3
sp|Q5T3I0|GPTC4_HUMAN;tr|A0A0A0MRK1|A0A0A0MRK1_HUMAN;tr|E9PAV9|E9PAV9_HUMAN;tr|E9PPY4|E9PPY4_HUMAN;tr|F2Z3C6|F2Z3C6_HUMAN;tr|F8W895|F8W895_HUMAN	sp|Q5T3I0|GPTC4_HUMAN;tr|A0A0A0MRK1|A0A0A0MRK1_HUMAN;tr|E9PAV9|E9PAV9_HUMAN	1	7841900	8748600	1	1	1	1	7841900	8748600	5;3;3;2;2;2	5;3;3;2;2;2	5;3;3;2;2;2	sp|Q5T3I0|GPTC4_HUMAN G patch domain-containing protein 4 OS=Homo sapiens GN=GPATCH4 PE=1 SV=2;tr|A0A0A0MRK1|A0A0A0MRK1_HUMAN G patch domain-containing protein 4 OS=Homo sapiens GN=GPATCH4 PE=1 SV=1;tr|E9PAV9|E9PAV9_HUMAN G patch domain-containing protein	6	5	5	5	0	0	0	0	4	3	0	0	0	0	4	3	0	0	0	0	4	3	17	17	17	50.381	446	446;370;375;119;143;264	0	38.185	0	0	0	0	15.2
sp|Q9NPD3|EXOS4_HUMAN;tr|E9PI41|E9PI41_HUMAN;tr|E9PPI9|E9PPI9_HUMAN	sp|Q9NPD3|EXOS4_HUMAN;tr|E9PI41|E9PI41_HUMAN;tr|E9PPI9|E9PPI9_HUMAN	1	7369300	8682900	1	1	1	1	7369300	8682900	4;2;2	4;2;2	4;2;2	sp|Q9NPD3|EXOS4_HUMAN Exosome complex component RRP41 OS=Homo sapiens GN=EXOSC4 PE=1 SV=3;tr|E9PI41|E9PI41_HUMAN Exosome complex component RRP41 (Fragment) OS=Homo sapiens GN=EXOSC4 PE=1 SV=5;tr|E9PPI9|E9PPI9_HUMAN Exosome complex component RRP41 OS=Homo s	3	4	4	4	0	0	0	0	3	4	0	0	0	0	3	4	0	0	0	0	3	4	19.6	19.6	19.6	26.383	245	245;262;328	0	26.491	0	0	0	0	15.5
sp|P02545|LMNA_HUMAN;tr|Q3BDU5|Q3BDU5_HUMAN;tr|Q5TCI8|Q5TCI8_HUMAN;tr|H0YAB0|H0YAB0_HUMAN;tr|A0A0C4DGC5|A0A0C4DGC5_HUMAN	sp|P02545|LMNA_HUMAN;tr|Q3BDU5|Q3BDU5_HUMAN;tr|Q5TCI8|Q5TCI8_HUMAN	0.833449	0.496965	8596600	12993000	8731200	1	10829000	4339100	8596600	10;9;8;4;1	10;9;8;4;1	10;9;8;4;1	sp|P02545|LMNA_HUMAN Prelamin-A/C OS=Homo sapiens GN=LMNA PE=1 SV=1;tr|Q3BDU5|Q3BDU5_HUMAN Prelamin-A/C OS=Homo sapiens GN=LMNA PE=1 SV=1;tr|Q5TCI8|Q5TCI8_HUMAN Prelamin-A/C OS=Homo sapiens GN=LMNA PE=1 SV=1	5	10	10	10	6	2	1	5	3	6	6	2	1	5	3	6	6	2	1	5	3	6	17.9	17.9	17.9	74.139	664	664;487;491;182;260	0	69.097	11.7	4.5	1.5	9.6	6
sp|O00139|KIF2A_HUMAN;tr|H0Y8H2|H0Y8H2_HUMAN;tr|D6R9M0|D6R9M0_HUMAN	sp|O00139|KIF2A_HUMAN	1	1	8519200	1	1	1	1	1	8519200	4;1;1	4;1;1	4;1;1	sp|O00139|KIF2A_HUMAN Kinesin-like protein KIF2A OS=Homo sapiens GN=KIF2A PE=1 SV=3	3	4	4	4	0	0	0	0	2	4	0	0	0	0	2	4	0	0	0	0	2	4	6.4	6.4	6.4	79.954	706	706;130;284	0	24.385	0	0	0	0	3.7
sp|P78316|NOP14_HUMAN;tr|E9PFK5|E9PFK5_HUMAN	sp|P78316|NOP14_HUMAN;tr|E9PFK5|E9PFK5_HUMAN	1	8880900	8505300	1	1	1	1	8880900	8505300	6;5	6;5	6;5	sp|P78316|NOP14_HUMAN Nucleolar protein 14 OS=Homo sapiens GN=NOP14 PE=1 SV=3;tr|E9PFK5|E9PFK5_HUMAN Nucleolar protein 14 OS=Homo sapiens GN=NOP14 PE=1 SV=1	2	6	6	6	0	0	0	0	6	5	0	0	0	0	6	5	0	0	0	0	6	5	7.7	7.7	7.7	97.667	857	857;788	0	39.63	0	0	0	0	7.7
sp|P50402|EMD_HUMAN;tr|Q5HY57|Q5HY57_HUMAN;tr|F8WEQ1|F8WEQ1_HUMAN	sp|P50402|EMD_HUMAN;tr|Q5HY57|Q5HY57_HUMAN	0.400712	8197700	8390700	15170000	1	1	6078800	8197700	8390700	7;6;1	7;6;1	7;6;1	sp|P50402|EMD_HUMAN Emerin OS=Homo sapiens GN=EMD PE=1 SV=1;tr|Q5HY57|Q5HY57_HUMAN Emerin OS=Homo sapiens GN=EMD PE=1 SV=1	3	7	7	7	7	0	0	2	3	2	7	0	0	2	3	2	7	0	0	2	3	2	37	37	37	28.994	254	254;219;21	0	58.614	37	0	0	11.8	17.7
sp|Q9UMY1|NOL7_HUMAN;tr|H7C2B1|H7C2B1_HUMAN	sp|Q9UMY1|NOL7_HUMAN;tr|H7C2B1|H7C2B1_HUMAN	1	8774700	8361700	1	1	1	1	8774700	8361700	2;1	2;1	2;1	sp|Q9UMY1|NOL7_HUMAN Nucleolar protein 7 OS=Homo sapiens GN=NOL7 PE=1 SV=2;tr|H7C2B1|H7C2B1_HUMAN Nucleolar protein 7 (Fragment) OS=Homo sapiens GN=NOL7 PE=1 SV=1	2	2	2	2	0	0	0	0	2	2	0	0	0	0	2	2	0	0	0	0	2	2	8.9	8.9	8.9	29.426	257	257;382	0	13.762	0	0	0	0	8.9
sp|Q9Y5J1|UTP18_HUMAN;tr|J3KSR7|J3KSR7_HUMAN;tr|J3QLD6|J3QLD6_HUMAN;tr|J3QRG0|J3QRG0_HUMAN;tr|J3QR85|J3QR85_HUMAN	sp|Q9Y5J1|UTP18_HUMAN	1	15366000	8357600	1	1	1	1	15366000	8357600	7;3;1;1;1	7;3;1;1;1	7;3;1;1;1	sp|Q9Y5J1|UTP18_HUMAN U3 small nucleolar RNA-associated protein 18 homolog OS=Homo sapiens GN=UTP18 PE=1 SV=3	5	7	7	7	0	0	0	0	4	5	0	0	0	0	4	5	0	0	0	0	4	5	14	14	14	62.003	556	556;177;115;123;143	0	46.842	0	0	0	0	9
sp|Q13895|BYST_HUMAN;tr|F8WBL2|F8WBL2_HUMAN;tr|H7BY94|H7BY94_HUMAN	sp|Q13895|BYST_HUMAN;tr|F8WBL2|F8WBL2_HUMAN	1	5135600	8260400	1	1	1	1	5135600	8260400	4;2;1	4;2;1	4;2;1	sp|Q13895|BYST_HUMAN Bystin OS=Homo sapiens GN=BYSL PE=1 SV=3;tr|F8WBL2|F8WBL2_HUMAN Bystin OS=Homo sapiens GN=BYSL PE=1 SV=1	3	4	4	4	0	0	0	0	4	2	0	0	0	0	4	2	0	0	0	0	4	2	12.1	12.1	12.1	49.601	437	437;194;183	0	27.346	0	0	0	0	12.1
sp|P18583|SON_HUMAN;tr|J3QSZ5|J3QSZ5_HUMAN	sp|P18583|SON_HUMAN	1	7444300	8122200	1	1	1	1	7444300	8122200	5;1	5;1	3;1	sp|P18583|SON_HUMAN Protein SON OS=Homo sapiens GN=SON PE=1 SV=4	2	5	5	3	1	0	0	2	2	4	1	0	0	2	2	4	0	0	0	0	2	3	2.9	2.9	1.7	263.83	2426	2426;454	0	37.806	0.6	0	0	1.2	1
sp|Q9Y3T9|NOC2L_HUMAN	sp|Q9Y3T9|NOC2L_HUMAN	1	6923100	8106000	1	1	1	1	6923100	8106000	6	6	6	sp|Q9Y3T9|NOC2L_HUMAN Nucleolar complex protein 2 homolog OS=Homo sapiens GN=NOC2L PE=1 SV=4	1	6	6	6	0	0	0	0	6	3	0	0	0	0	6	3	0	0	0	0	6	3	8.8	8.8	8.8	84.918	749	749	0	36.815	0	0	0	0	8.8
sp|Q9H9Y2|RPF1_HUMAN;tr|X6R7Q1|X6R7Q1_HUMAN	sp|Q9H9Y2|RPF1_HUMAN	1	12024000	8034400	1	1	1	1	12024000	8034400	7;1	7;1	7;1	sp|Q9H9Y2|RPF1_HUMAN Ribosome production factor 1 OS=Homo sapiens GN=RPF1 PE=1 SV=2	2	7	7	7	0	0	0	0	7	5	0	0	0	0	7	5	0	0	0	0	7	5	30.9	30.9	30.9	40.11	349	349;129	0	48.427	0	0	0	0	30.9
sp|Q5JSQ8|KHDCL_HUMAN	sp|Q5JSQ8|KHDCL_HUMAN	1	8629700	7999200	1	1	1	1	8629700	7999200	3	3	3	sp|Q5JSQ8|KHDCL_HUMAN Putative KHDC1-like protein OS=Homo sapiens GN=KHDC1L PE=5 SV=1	1	3	3	3	0	0	0	0	3	2	0	0	0	0	3	2	0	0	0	0	3	2	3.3	3.3	3.3	175.82	1641	1641	0	20.167	0	0	0	0	3.3
tr|C9J4Z3|C9J4Z3_HUMAN;sp|P61513|RL37A_HUMAN;tr|M0R0A1|M0R0A1_HUMAN;tr|Q6P4E4|Q6P4E4_HUMAN;tr|E9PEL3|E9PEL3_HUMAN;tr|M0R2L6|M0R2L6_HUMAN;tr|G5E9R3|G5E9R3_HUMAN	tr|C9J4Z3|C9J4Z3_HUMAN;sp|P61513|RL37A_HUMAN;tr|M0R0A1|M0R0A1_HUMAN;tr|Q6P4E4|Q6P4E4_HUMAN;tr|E9PEL3|E9PEL3_HUMAN;tr|M0R2L6|M0R2L6_HUMAN;tr|G5E9R3|G5E9R3_HUMAN	4244100	9096800	7977400	1	1	1	4244100	9096800	7977400	3;3;2;2;2;2;2	3;3;2;2;2;2;2	3;3;2;2;2;2;2	tr|C9J4Z3|C9J4Z3_HUMAN 60S ribosomal protein L37a OS=Homo sapiens GN=RPL37A PE=1 SV=1;sp|P61513|RL37A_HUMAN 60S ribosomal protein L37a OS=Homo sapiens GN=RPL37A PE=1 SV=2;tr|M0R0A1|M0R0A1_HUMAN 60S ribosomal protein L37a OS=Homo sapiens GN=RPL37A PE=1 SV=1	7	3	3	3	0	0	0	2	3	2	0	0	0	2	3	2	0	0	0	2	3	2	39.7	39.7	39.7	7.624	68	68;92;60;72;75;88;517	0	22.62	0	0	0	39.7	39.7
sp|Q9Y3I0|RTCB_HUMAN	sp|Q9Y3I0|RTCB_HUMAN	1	6419600	7876400	1	1	1	1	6419600	7876400	3	3	3	sp|Q9Y3I0|RTCB_HUMAN tRNA-splicing ligase RtcB homolog OS=Homo sapiens GN=RTCB PE=1 SV=1	1	3	3	3	0	0	0	0	2	3	0	0	0	0	2	3	0	0	0	0	2	3	8.1	8.1	8.1	55.21	505	505	0	22.135	0	0	0	0	5.3
sp|Q8IY37|DHX37_HUMAN;tr|F5H3Y4|F5H3Y4_HUMAN	sp|Q8IY37|DHX37_HUMAN;tr|F5H3Y4|F5H3Y4_HUMAN	1	7557400	7774800	1	1	1	1	7557400	7774800	5;4	5;4	5;4	sp|Q8IY37|DHX37_HUMAN Probable ATP-dependent RNA helicase DHX37 OS=Homo sapiens GN=DHX37 PE=1 SV=1;tr|F5H3Y4|F5H3Y4_HUMAN Probable ATP-dependent RNA helicase DHX37 OS=Homo sapiens GN=DHX37 PE=1 SV=1	2	5	5	5	0	0	0	0	5	3	0	0	0	0	5	3	0	0	0	0	5	3	6.7	6.7	6.7	129.54	1157	1157;962	0	33.41	0	0	0	0	6.7
tr|A0A087X1A5|A0A087X1A5_HUMAN;sp|O95793|STAU1_HUMAN;tr|Q5JW30|Q5JW30_HUMAN;tr|Q5JW28|Q5JW28_HUMAN	tr|A0A087X1A5|A0A087X1A5_HUMAN;sp|O95793|STAU1_HUMAN;tr|Q5JW30|Q5JW30_HUMAN;tr|Q5JW28|Q5JW28_HUMAN	1	1	7628500	1	1	1	1	1	7628500	6;6;5;3	6;6;5;3	6;6;5;3	tr|A0A087X1A5|A0A087X1A5_HUMAN Double-stranded RNA-binding protein Staufen homolog 1 OS=Homo sapiens GN=STAU1 PE=1 SV=1;sp|O95793|STAU1_HUMAN Double-stranded RNA-binding protein Staufen homolog 1 OS=Homo sapiens GN=STAU1 PE=1 SV=2;tr|Q5JW30|Q5JW30_HUMAN Do	4	6	6	6	0	0	0	0	1	6	0	0	0	0	1	6	0	0	0	0	1	6	17.4	17.4	17.4	54.945	493	493;577;494;517	0	36.897	0	0	0	0	3.2
tr|A0A0G2JJL1|A0A0G2JJL1_HUMAN	tr|A0A0G2JJL1|A0A0G2JJL1_HUMAN	1	6637400	7579800	1	1	1	1	6637400	7579800	4	1	1	tr|A0A0G2JJL1|A0A0G2JJL1_HUMAN WD repeat-containing protein 46 (Fragment) OS=Homo sapiens GN=WDR46 PE=4 SV=1	1	4	1	1	0	0	0	0	4	4	0	0	0	0	1	1	0	0	0	0	1	1	15	4.2	4.2	56.545	526	526	0	14.143	0	0	0	0	15
sp|Q07065|CKAP4_HUMAN	sp|Q07065|CKAP4_HUMAN	1	4734900	7552600	1	1	1	1	4734900	7552600	4	4	4	sp|Q07065|CKAP4_HUMAN Cytoskeleton-associated protein 4 OS=Homo sapiens GN=CKAP4 PE=1 SV=2	1	4	4	4	0	0	0	0	3	4	0	0	0	0	3	4	0	0	0	0	3	4	11.3	11.3	11.3	66.022	602	602	0	32.106	0	0	0	0	9
sp|Q9H9L3|I20L2_HUMAN	sp|Q9H9L3|I20L2_HUMAN	1	1	7416100	1	1	1	1	1	7416100	2	2	2	sp|Q9H9L3|I20L2_HUMAN Interferon-stimulated 20 kDa exonuclease-like 2 OS=Homo sapiens GN=ISG20L2 PE=1 SV=1	1	2	2	2	0	0	0	0	1	2	0	0	0	0	1	2	0	0	0	0	1	2	8.5	8.5	8.5	39.153	353	353	0	19.569	0	0	0	0	3.7
sp|O60508|PRP17_HUMAN;tr|Q5SRN1|Q5SRN1_HUMAN	sp|O60508|PRP17_HUMAN;tr|Q5SRN1|Q5SRN1_HUMAN	3106500	12863000	7312300	1	1	1	3106500	12863000	7312300	6;5	6;5	6;5	sp|O60508|PRP17_HUMAN Pre-mRNA-processing factor 17 OS=Homo sapiens GN=CDC40 PE=1 SV=1;tr|Q5SRN1|Q5SRN1_HUMAN Pre-mRNA-processing factor 17 OS=Homo sapiens GN=CDC40 PE=1 SV=1	2	6	6	6	0	0	0	2	6	3	0	0	0	2	6	3	0	0	0	2	6	3	17.6	17.6	17.6	65.521	579	579;539	0	36.589	0	0	0	6	17.6
tr|Q5JRI1|Q5JRI1_HUMAN;sp|O75494|SRS10_HUMAN;tr|R4GMP8|R4GMP8_HUMAN;tr|Q6IQ42|Q6IQ42_HUMAN	tr|Q5JRI1|Q5JRI1_HUMAN;sp|O75494|SRS10_HUMAN	1	9147800	7250400	1	1	1	1	9147800	7250400	6;6;1;1	6;6;1;1	3;3;1;1	tr|Q5JRI1|Q5JRI1_HUMAN Serine/arginine-rich-splicing factor 10 OS=Homo sapiens GN=SRSF10 PE=1 SV=1;sp|O75494|SRS10_HUMAN Serine/arginine-rich splicing factor 10 OS=Homo sapiens GN=SRSF10 PE=1 SV=1	4	6	6	3	1	0	0	3	3	4	1	0	0	3	3	4	0	0	0	2	1	1	27.3	27.3	14	20.913	172	172;262;40;277	0	41.563	6.4	0	0	20.3	19.2
tr|E5RHM4|E5RHM4_HUMAN;tr|B3KME9|B3KME9_HUMAN;sp|Q9NV06|DCA13_HUMAN;tr|A0A087WT20|A0A087WT20_HUMAN;tr|A0A087X1F8|A0A087X1F8_HUMAN	tr|E5RHM4|E5RHM4_HUMAN;tr|B3KME9|B3KME9_HUMAN;sp|Q9NV06|DCA13_HUMAN;tr|A0A087WT20|A0A087WT20_HUMAN;tr|A0A087X1F8|A0A087X1F8_HUMAN	1	1	7145200	1	1	1	1	1	7145200	2;2;2;2;1	2;2;2;2;1	2;2;2;2;1	tr|E5RHM4|E5RHM4_HUMAN DDB1- and CUL4-associated factor 13 OS=Homo sapiens GN=DCAF13 PE=1 SV=2;tr|B3KME9|B3KME9_HUMAN DDB1- and CUL4-associated factor 13 OS=Homo sapiens GN=DCAF13 PE=1 SV=1;sp|Q9NV06|DCA13_HUMAN DDB1- and CUL4-associated factor 13 OS=Homo	5	2	2	2	0	0	0	0	0	2	0	0	0	0	0	2	0	0	0	0	0	2	17.3	17.3	17.3	21.134	185	185;221;445;597;204	0	12.427	0	0	0	0	0
sp|Q9BSC4|NOL10_HUMAN	sp|Q9BSC4|NOL10_HUMAN	1	4766700	7131600	1	1	1	1	4766700	7131600	6	6	6	sp|Q9BSC4|NOL10_HUMAN Nucleolar protein 10 OS=Homo sapiens GN=NOL10 PE=1 SV=1	1	6	6	6	0	0	0	0	5	4	0	0	0	0	5	4	0	0	0	0	5	4	12.8	12.8	12.8	80.301	688	688	0	40.606	0	0	0	0	10.3
tr|A0A087WV66|A0A087WV66_HUMAN;sp|P46013|KI67_HUMAN	tr|A0A087WV66|A0A087WV66_HUMAN;sp|P46013|KI67_HUMAN	1	5783500	7077200	1	1	1	1	5783500	7077200	6;6	6;6	6;6	tr|A0A087WV66|A0A087WV66_HUMAN Antigen KI-67 OS=Homo sapiens GN=MKI67 PE=1 SV=1;sp|P46013|KI67_HUMAN Antigen KI-67 OS=Homo sapiens GN=MKI67 PE=1 SV=2	2	6	6	6	0	0	0	0	4	5	0	0	0	0	4	5	0	0	0	0	4	5	3.7	3.7	3.7	358.62	3255	3255;3256	0	37.919	0	0	0	0	2.3
tr|F6VRR5|F6VRR5_HUMAN;sp|Q9BY77|PDIP3_HUMAN;tr|Q8WUT1|Q8WUT1_HUMAN;tr|F8WCX5|F8WCX5_HUMAN;tr|Q6R954|Q6R954_HUMAN;tr|F8WEE2|F8WEE2_HUMAN	tr|F6VRR5|F6VRR5_HUMAN;sp|Q9BY77|PDIP3_HUMAN;tr|Q8WUT1|Q8WUT1_HUMAN;tr|F8WCX5|F8WCX5_HUMAN	4915300	5409200	7019400	1	1	1	4915300	5409200	7019400	6;6;3;3;2;2	6;6;3;3;2;2	6;6;3;3;2;2	tr|F6VRR5|F6VRR5_HUMAN Polymerase delta-interacting protein 3 OS=Homo sapiens GN=POLDIP3 PE=1 SV=1;sp|Q9BY77|PDIP3_HUMAN Polymerase delta-interacting protein 3 OS=Homo sapiens GN=POLDIP3 PE=1 SV=2;tr|Q8WUT1|Q8WUT1_HUMAN POLDIP3 protein OS=Homo sapiens GN=P	6	6	6	6	1	1	0	2	5	3	1	1	0	2	5	3	1	1	0	2	5	3	24.2	24.2	24.2	48.103	438	438;981;229;281;185;189	0	41.114	3	3	0	6.8	19.9
tr|H3BPE7|H3BPE7_HUMAN;sp|P35637|FUS_HUMAN	tr|H3BPE7|H3BPE7_HUMAN;sp|P35637|FUS_HUMAN	7789800	6762300	6850800	1	1	1	7789800	6762300	6850800	4;4	4;4	3;3	tr|H3BPE7|H3BPE7_HUMAN RNA-binding protein FUS OS=Homo sapiens GN=FUS PE=1 SV=1;sp|P35637|FUS_HUMAN RNA-binding protein FUS OS=Homo sapiens GN=FUS PE=1 SV=1	2	4	4	3	0	0	0	2	3	3	0	0	0	2	3	3	0	0	0	1	2	2	8.5	8.5	8.5	53.496	527	527;1669	0	33.612	0	0	0	3	6.3
sp|Q7Z353|HDX_HUMAN;tr|E2QRN0|E2QRN0_HUMAN	sp|Q7Z353|HDX_HUMAN	7125500	4226500	6831600	1	1	1	7125500	4226500	6831600	7;2	7;2	7;2	sp|Q7Z353|HDX_HUMAN Highly divergent homeobox OS=Homo sapiens GN=HDX PE=1 SV=1	2	7	7	7	0	0	0	6	4	2	0	0	0	6	4	2	0	0	0	6	4	2	13.2	13.2	13.2	77.205	690	690;207	0	45.202	0	0	0	11.2	8
sp|P54132|BLM_HUMAN;tr|H0YNU5|H0YNU5_HUMAN;tr|H0YLV8|H0YLV8_HUMAN	sp|P54132|BLM_HUMAN;tr|H0YNU5|H0YNU5_HUMAN	0.629853	4774800	6743000	7693700	1	1	4845900	4774800	6743000	8;8;1	8;8;1	8;8;1	sp|P54132|BLM_HUMAN Bloom syndrome protein OS=Homo sapiens GN=BLM PE=1 SV=1;tr|H0YNU5|H0YNU5_HUMAN Bloom syndrome protein OS=Homo sapiens GN=BLM PE=1 SV=1	3	8	8	8	4	0	1	2	3	5	4	0	1	2	3	5	4	0	1	2	3	5	6.8	6.8	6.8	159	1417	1417;1286;413	0	51.65	2.7	0	0.8	1.4	3.1
tr|A0A0C4DGZ0|A0A0C4DGZ0_HUMAN;sp|P24928|RPB1_HUMAN;tr|A0A087WWE2|A0A087WWE2_HUMAN	tr|A0A0C4DGZ0|A0A0C4DGZ0_HUMAN;sp|P24928|RPB1_HUMAN;tr|A0A087WWE2|A0A087WWE2_HUMAN	1	4423200	6736800	1	1	1	1	4423200	6736800	3;3;3	3;3;3	3;3;3	tr|A0A0C4DGZ0|A0A0C4DGZ0_HUMAN DNA-directed RNA polymerase OS=Homo sapiens GN=POLR2A PE=1 SV=1;sp|P24928|RPB1_HUMAN DNA-directed RNA polymerase II subunit RPB1 OS=Homo sapiens GN=POLR2A PE=1 SV=2;tr|A0A087WWE2|A0A087WWE2_HUMAN DNA-directed RNA polymerase O	3	3	3	3	0	0	0	0	2	2	0	0	0	0	2	2	0	0	0	0	2	2	2.5	2.5	2.5	217.2	1970	1970;1970;1980	0	19.835	0	0	0	0	1.8
sp|O43290|SNUT1_HUMAN	sp|O43290|SNUT1_HUMAN	1	6962000	6540500	1	1	1	1	6962000	6540500	4	4	4	sp|O43290|SNUT1_HUMAN U4/U6.U5 tri-snRNP-associated protein 1 OS=Homo sapiens GN=SART1 PE=1 SV=1	1	4	4	4	1	0	0	0	4	3	1	0	0	0	4	3	1	0	0	0	4	3	7.8	7.8	7.8	90.254	800	800	0	27.793	1.5	0	0	0	7.8
tr|D6RF44|D6RF44_HUMAN;tr|H0YA96|H0YA96_HUMAN;tr|D6RAF8|D6RAF8_HUMAN;tr|H0Y8G5|H0Y8G5_HUMAN;sp|Q14103|HNRPD_HUMAN;tr|D6RBQ9|D6RBQ9_HUMAN	tr|D6RF44|D6RF44_HUMAN;tr|H0YA96|H0YA96_HUMAN;tr|D6RAF8|D6RAF8_HUMAN;tr|H0Y8G5|H0Y8G5_HUMAN;sp|Q14103|HNRPD_HUMAN;tr|D6RBQ9|D6RBQ9_HUMAN	2.82759	1	6508800	1564900	1	1	4424900	1	6508800	2;2;2;2;2;1	2;2;2;2;2;1	1;1;1;1;1;0	tr|D6RF44|D6RF44_HUMAN Heterogeneous nuclear ribonucleoprotein D0 (Fragment) OS=Homo sapiens GN=HNRNPD PE=1 SV=5;tr|H0YA96|H0YA96_HUMAN Heterogeneous nuclear ribonucleoprotein D0 (Fragment) OS=Homo sapiens GN=HNRNPD PE=1 SV=1;tr|D6RAF8|D6RAF8_HUMAN Heterog	6	2	2	1	2	0	0	2	1	2	2	0	0	2	1	2	1	0	0	1	1	1	19.6	19.6	12.5	12.64	112	112;210;221;261;355;155	0	13.479	19.6	0	0	19.6	12.5
tr|A0A087WX29|A0A087WX29_HUMAN;sp|Q13148|TADBP_HUMAN;tr|E7EPY2|E7EPY2_HUMAN;tr|A0A087WYY0|A0A087WYY0_HUMAN;tr|A0A087X260|A0A087X260_HUMAN;tr|B1AKP7|B1AKP7_HUMAN;tr|A0A087WV68|A0A087WV68_HUMAN;tr|A0A087WXQ5|A0A087WXQ5_HUMAN;tr|K7EJM5|K7EJM5_HUMAN;tr|K7EN94|K7EN94_HUMAN;tr|A0A087WXV3|A0A087WXV3_HUMAN;tr|A0A087WX67|A0A087WX67_HUMAN;tr|A0A087WW61|A0A087WW61_HUMAN;tr|A0A087WYE7|A0A087WYE7_HUMAN;tr|A0A…	tr|A0A087WX29|A0A087WX29_HUMAN;sp|Q13148|TADBP_HUMAN;tr|E7EPY2|E7EPY2_HUMAN;tr|A0A087WYY0|A0A087WYY0_HUMAN;tr|A0A087X260|A0A087X260_HUMAN;tr|B1AKP7|B1AKP7_HUMAN;tr|A0A087WV68|A0A087WV68_HUMAN;tr|A0A087WXQ5|A0A087WXQ5_HUMAN;tr|K7EJM5|K7EJM5_HUMAN;tr|K7EN94|K7EN94_HUMAN;tr|A0A087WXV3|A0A087WXV3_HUMAN;tr|A0A087WX67|A0A087WX67_HUMAN;tr|A0A087WW61|A0A087WW61_HUMAN	1	6728900	6506300	1	1	1	1	6728900	6506300	4;4;3;3;3;3;3;3;2;2;2;2;2;1;1;1;1	4;4;3;3;3;3;3;3;2;2;2;2;2;1;1;1;1	4;4;3;3;3;3;3;3;2;2;2;2;2;1;1;1;1	tr|A0A087WX29|A0A087WX29_HUMAN TAR DNA-binding protein 43 (Fragment) OS=Homo sapiens GN=TARDBP PE=1 SV=1;sp|Q13148|TADBP_HUMAN TAR DNA-binding protein 43 OS=Homo sapiens GN=TARDBP PE=1 SV=1;tr|E7EPY2|E7EPY2_HUMAN MDS1 and EVI1 complex locus protein EVI1 (F	17	4	4	4	2	0	0	2	2	2	2	0	0	2	2	2	2	0	0	2	2	2	21	21	21	26.743	243	243;414;490;304;301;295;212;200;201;276;175;149;138;89;222;127;65	0	42.824	12.3	0	0	11.1	9.9
sp|Q14152|EIF3A_HUMAN	sp|Q14152|EIF3A_HUMAN	1	8186800	6277300	1	1	1	1	8186800	6277300	9	9	9	sp|Q14152|EIF3A_HUMAN Eukaryotic translation initiation factor 3 subunit A OS=Homo sapiens GN=EIF3A PE=1 SV=1	1	9	9	9	5	1	0	0	4	5	5	1	0	0	4	5	5	1	0	0	4	5	8.4	8.4	8.4	166.57	1382	1382	0	60.277	4.8	0.9	0	0	3.7
sp|O75131|CPNE3_HUMAN;tr|A0A087WXR6|A0A087WXR6_HUMAN;tr|E5RHZ0|E5RHZ0_HUMAN;tr|A0A087WYQ3|A0A087WYQ3_HUMAN;tr|H0YB26|H0YB26_HUMAN;sp|Q96FN4|CPNE2_HUMAN;sp|Q8IYJ1|CPNE9_HUMAN;sp|Q96A23|CPNE4_HUMAN;sp|O95741|CPNE6_HUMAN;sp|Q9HCH3|CPNE5_HUMAN;sp|Q9UBL6|CPNE7_HUMAN	sp|O75131|CPNE3_HUMAN	2376500	5003900	6138700	1	1	1	2376500	5003900	6138700	3;1;1;1;1;1;1;1;1;1;1	3;1;1;1;1;1;1;1;1;1;1	2;1;1;1;1;0;0;0;0;0;0	sp|O75131|CPNE3_HUMAN Copine-3 OS=Homo sapiens GN=CPNE3 PE=1 SV=1	11	3	3	2	1	0	0	2	2	3	1	0	0	2	2	3	0	0	0	1	1	2	7.3	7.3	5.6	60.13	537	537;139;153;234;262;548;553;557;557;593;633	0	19.815	1.7	0	0	4.7	4.3
tr|X6R700|X6R700_HUMAN;sp|Q9Y3Y2|CHTOP_HUMAN;tr|A0A087X1B7|A0A087X1B7_HUMAN;tr|Q5T7Y7|Q5T7Y7_HUMAN	tr|X6R700|X6R700_HUMAN;sp|Q9Y3Y2|CHTOP_HUMAN;tr|A0A087X1B7|A0A087X1B7_HUMAN;tr|Q5T7Y7|Q5T7Y7_HUMAN	1	3821900	6133500	1	1	1	1	3821900	6133500	2;2;1;1	2;2;1;1	2;2;1;1	tr|X6R700|X6R700_HUMAN Chromatin target of PRMT1 protein OS=Homo sapiens GN=CHTOP PE=1 SV=1;sp|Q9Y3Y2|CHTOP_HUMAN Chromatin target of PRMT1 protein OS=Homo sapiens GN=CHTOP PE=1 SV=2;tr|A0A087X1B7|A0A087X1B7_HUMAN Chromatin target of PRMT1 protein OS=Homo	4	2	2	2	0	0	0	0	2	2	0	0	0	0	2	2	0	0	0	0	2	2	13	13	13	23.661	223	223;248;76;101	0	14.085	0	0	0	0	13
sp|Q9ULX6|AKP8L_HUMAN	sp|Q9ULX6|AKP8L_HUMAN	1	1	6123500	1	1	1	1	1	6123500	3	3	3	sp|Q9ULX6|AKP8L_HUMAN A-kinase anchor protein 8-like OS=Homo sapiens GN=AKAP8L PE=1 SV=3	1	3	3	3	0	0	0	0	2	2	0	0	0	0	2	2	0	0	0	0	2	2	6.5	6.5	6.5	71.648	646	646	0	23.89	0	0	0	0	4.5
sp|P51532|SMCA4_HUMAN;tr|A0A0A0MT49|A0A0A0MT49_HUMAN;tr|Q9HBD4|Q9HBD4_HUMAN;sp|P51531|SMCA2_HUMAN;tr|F6XE55|F6XE55_HUMAN;tr|A0A0A0MSS5|A0A0A0MSS5_HUMAN;tr|F6UH26|F6UH26_HUMAN;tr|B1ALG1|B1ALG1_HUMAN;tr|F6T8Q0|F6T8Q0_HUMAN;tr|B1ALG2|B1ALG2_HUMAN;tr|F6XG14|F6XG14_HUMAN;tr|B1ALF6|B1ALF6_HUMAN	sp|P51532|SMCA4_HUMAN;tr|A0A0A0MT49|A0A0A0MT49_HUMAN;tr|Q9HBD4|Q9HBD4_HUMAN	1.99812e-07	4851300	6083100	5004700	1	1	1	4851300	6083100	7;7;7;3;2;2;2;2;2;2;2;2	7;7;7;3;2;2;2;2;2;2;2;2	7;7;7;3;2;2;2;2;2;2;2;2	sp|P51532|SMCA4_HUMAN Transcription activator BRG1 OS=Homo sapiens GN=SMARCA4 PE=1 SV=2;tr|A0A0A0MT49|A0A0A0MT49_HUMAN Transcription activator BRG1 OS=Homo sapiens GN=SMARCA4 PE=1 SV=1;tr|Q9HBD4|Q9HBD4_HUMAN SMARCA4 isoform 2 OS=Homo sapiens GN=SMARCA4 PE=	12	7	7	7	2	0	0	0	5	6	2	0	0	0	5	6	2	0	0	0	5	6	5.5	5.5	5.5	184.64	1647	1647;1681;2490;1590;153;171;177;236;248;254;271;278	0	46.605	1.6	0	0	0	4.2
sp|Q96N67|DOCK7_HUMAN;tr|H0Y7L2|H0Y7L2_HUMAN;tr|A0A0C4DGY6|A0A0C4DGY6_HUMAN;sp|Q96HP0|DOCK6_HUMAN;sp|Q8NF50|DOCK8_HUMAN;tr|A2A369|A2A369_HUMAN	sp|Q96N67|DOCK7_HUMAN;tr|H0Y7L2|H0Y7L2_HUMAN	0.816462	1	5921900	7552100	1	1	6166000	1	5921900	8;5;3;1;1;1	8;5;3;1;1;1	8;5;3;1;1;1	sp|Q96N67|DOCK7_HUMAN Dedicator of cytokinesis protein 7 OS=Homo sapiens GN=DOCK7 PE=1 SV=4;tr|H0Y7L2|H0Y7L2_HUMAN Dedicator of cytokinesis protein 7 (Fragment) OS=Homo sapiens GN=DOCK7 PE=1 SV=1	6	8	8	8	5	0	0	7	1	2	5	0	0	7	1	2	5	0	0	7	1	2	4.9	4.9	4.9	242.56	2140	2140;1303;803;2047;2099;2298	0	58.706	3.4	0	0	4.1	0.8
sp|P09874|PARP1_HUMAN	sp|P09874|PARP1_HUMAN	1	2913700	5855300	1	1	1	1	2913700	5855300	3	3	3	sp|P09874|PARP1_HUMAN Poly [ADP-ribose] polymerase 1 OS=Homo sapiens GN=PARP1 PE=1 SV=4	1	3	3	3	0	0	0	0	2	3	0	0	0	0	2	3	0	0	0	0	2	3	3.2	3.2	3.2	166.2	1501	1501	0	20.526	0	0	0	0	2.2
sp|P55795|HNRH2_HUMAN	sp|P55795|HNRH2_HUMAN	1	5429700	5653800	1	1	1	1	5429700	5653800	7	2	2	sp|P55795|HNRH2_HUMAN Heterogeneous nuclear ribonucleoprotein H2 OS=Homo sapiens GN=HNRNPH2 PE=1 SV=1	1	7	2	2	4	3	3	4	6	5	0	0	0	0	2	2	0	0	0	0	2	2	19.4	6.2	6.2	49.263	449	449	0	23.404	11.4	9.6	9.6	11.4	17.6
sp|O94906|PRP6_HUMAN	sp|O94906|PRP6_HUMAN	1	1	5538500	1	1	1	1	1	5538500	7	7	7	sp|O94906|PRP6_HUMAN Pre-mRNA-processing factor 6 OS=Homo sapiens GN=PRPF6 PE=1 SV=1	1	7	7	7	2	0	0	1	3	3	2	0	0	1	3	3	2	0	0	1	3	3	8.4	8.4	8.4	106.92	941	941	0	42.652	2.9	0	0	1	3.5
sp|Q53HL2|BOREA_HUMAN	sp|Q53HL2|BOREA_HUMAN	1	3436100	5487200	1	1	1	1	3436100	5487200	4	4	4	sp|Q53HL2|BOREA_HUMAN Borealin OS=Homo sapiens GN=CDCA8 PE=1 SV=2	1	4	4	4	0	0	0	0	3	3	0	0	0	0	3	3	0	0	0	0	3	3	20.4	20.4	20.4	31.323	280	280	0	27.709	0	0	0	0	15
sp|Q2TAC6|KIF19_HUMAN	sp|Q2TAC6|KIF19_HUMAN	1	1	5466400	1	1	1	1	1	5466400	1	1	1	sp|Q2TAC6|KIF19_HUMAN Kinesin-like protein KIF19 OS=Homo sapiens GN=KIF19 PE=2 SV=2	1	1	1	1	1	1	1	1	1	1	1	1	1	1	1	1	1	1	1	1	1	1	1	1	1	111.33	998	998	1	-2	1	1	1	1	1
sp|Q15424|SAFB1_HUMAN;tr|K7ES42|K7ES42_HUMAN	sp|Q15424|SAFB1_HUMAN;tr|K7ES42|K7ES42_HUMAN	1	5686000	5446500	1	1	1	1	5686000	5446500	4;2	4;2	3;2	sp|Q15424|SAFB1_HUMAN Scaffold attachment factor B1 OS=Homo sapiens GN=SAFB PE=1 SV=4;tr|K7ES42|K7ES42_HUMAN Scaffold attachment factor B1 OS=Homo sapiens GN=SAFB PE=1 SV=1	2	4	4	3	0	0	0	0	4	2	0	0	0	0	4	2	0	0	0	0	3	2	10.2	10.2	6.7	102.64	915	915;106	0	35.364	0	0	0	0	10.2
tr|E9PMP7|E9PMP7_HUMAN;tr|E9PMS6|E9PMS6_HUMAN;tr|F8WD26|F8WD26_HUMAN;tr|J3KP06|J3KP06_HUMAN;sp|Q8WWI1|LMO7_HUMAN;tr|H0Y424|H0Y424_HUMAN;tr|A0A0A0MTE2|A0A0A0MTE2_HUMAN;tr|E9PMT2|E9PMT2_HUMAN	tr|E9PMP7|E9PMP7_HUMAN;tr|E9PMS6|E9PMS6_HUMAN;tr|F8WD26|F8WD26_HUMAN;tr|J3KP06|J3KP06_HUMAN;sp|Q8WWI1|LMO7_HUMAN;tr|H0Y424|H0Y424_HUMAN;tr|A0A0A0MTE2|A0A0A0MTE2_HUMAN;tr|E9PMT2|E9PMT2_HUMAN	0.990978	6358100	5325100	3956800	1	1	3921100	6358100	5325100	5;5;5;5;5;3;3;3	5;5;5;5;5;3;3;3	5;5;5;5;5;3;3;3	tr|E9PMP7|E9PMP7_HUMAN LIM domain only protein 7 (Fragment) OS=Homo sapiens GN=LMO7 PE=1 SV=5;tr|E9PMS6|E9PMS6_HUMAN LIM domain only protein 7 OS=Homo sapiens GN=LMO7 PE=1 SV=1;tr|F8WD26|F8WD26_HUMAN LIM domain only protein 7 OS=Homo sapiens GN=LMO7 PE=1 S	8	5	5	5	3	0	0	4	3	2	3	0	0	4	3	2	3	0	0	4	3	2	9.3	9.3	9.3	119.52	1046	1046;1275;1631;1668;1683;1056;1385;1398	0	32.364	5.2	0	0	6.9	6
tr|Q5T4L4|Q5T4L4_HUMAN;sp|Q71UM5|RS27L_HUMAN;sp|P42677|RS27_HUMAN;tr|C9JLI6|C9JLI6_HUMAN;tr|H0YMV8|H0YMV8_HUMAN	tr|Q5T4L4|Q5T4L4_HUMAN;sp|Q71UM5|RS27L_HUMAN;sp|P42677|RS27_HUMAN;tr|C9JLI6|C9JLI6_HUMAN;tr|H0YMV8|H0YMV8_HUMAN	1	1	5275500	1	1	1	1	1	5275500	1;1;1;1;1	1;1;1;1;1	1;1;1;1;1	tr|Q5T4L4|Q5T4L4_HUMAN 40S ribosomal protein S27 OS=Homo sapiens GN=RPS27 PE=1 SV=1;sp|Q71UM5|RS27L_HUMAN 40S ribosomal protein S27-like OS=Homo sapiens GN=RPS27L PE=1 SV=3;sp|P42677|RS27_HUMAN 40S ribosomal protein S27 OS=Homo sapiens GN=RPS27 PE=1 SV=3;t	5	1	1	1	1	0	0	0	1	1	1	0	0	0	1	1	1	0	0	0	1	1	19.7	19.7	19.7	7.3564	66	66;84;84;97;100	0	12.792	19.7	0	0	0	19.7
tr|H7C2W9|H7C2W9_HUMAN;tr|C9JU56|C9JU56_HUMAN;tr|B7Z4E3|B7Z4E3_HUMAN;sp|P62899|RL31_HUMAN;tr|B7Z4C8|B7Z4C8_HUMAN;tr|B8ZZK4|B8ZZK4_HUMAN	tr|H7C2W9|H7C2W9_HUMAN;tr|C9JU56|C9JU56_HUMAN;tr|B7Z4E3|B7Z4E3_HUMAN;sp|P62899|RL31_HUMAN;tr|B7Z4C8|B7Z4C8_HUMAN;tr|B8ZZK4|B8ZZK4_HUMAN	1	1	5249100	1	1	1	1	1	5249100	2;2;2;2;2;1	2;2;2;2;2;1	2;2;2;2;2;1	tr|H7C2W9|H7C2W9_HUMAN 60S ribosomal protein L31 (Fragment) OS=Homo sapiens GN=RPL31 PE=1 SV=1;tr|C9JU56|C9JU56_HUMAN 60S ribosomal protein L31 (Fragment) OS=Homo sapiens GN=RPL31 PE=1 SV=1;tr|B7Z4E3|B7Z4E3_HUMAN 60S ribosomal protein L31 OS=Homo sapiens G	6	2	2	2	0	0	0	0	1	2	0	0	0	0	1	2	0	0	0	0	1	2	21.3	21.3	21.3	12.701	108	108;115;120;125;130;79	0	15.947	0	0	0	0	13
sp|P30876|RPB2_HUMAN;tr|C9J2Y9|C9J2Y9_HUMAN;tr|C9J4M6|C9J4M6_HUMAN	sp|P30876|RPB2_HUMAN;tr|C9J2Y9|C9J2Y9_HUMAN;tr|C9J4M6|C9J4M6_HUMAN	1	4930700	5215400	1	1	1	1	4930700	5215400	4;4;3	4;4;3	4;4;3	sp|P30876|RPB2_HUMAN DNA-directed RNA polymerase II subunit RPB2 OS=Homo sapiens GN=POLR2B PE=1 SV=1;tr|C9J2Y9|C9J2Y9_HUMAN DNA-directed RNA polymerase OS=Homo sapiens GN=POLR2B PE=1 SV=2;tr|C9J4M6|C9J4M6_HUMAN DNA-directed RNA polymerase OS=Homo sapiens G	3	4	4	4	0	0	0	0	2	4	0	0	0	0	2	4	0	0	0	0	2	4	5.5	5.5	5.5	133.9	1174	1174;1167;1099	0	25.236	0	0	0	0	2.1
tr|Q49AN9|Q49AN9_HUMAN;tr|F5H013|F5H013_HUMAN;sp|P62308|RUXG_HUMAN;sp|A8MWD9|RUXGL_HUMAN;tr|C9JVQ0|C9JVQ0_HUMAN	tr|Q49AN9|Q49AN9_HUMAN;tr|F5H013|F5H013_HUMAN;sp|P62308|RUXG_HUMAN;sp|A8MWD9|RUXGL_HUMAN	1	1	5162500	1	1	1	1	1	5162500	3;3;3;3;1	3;3;3;3;1	3;3;3;3;1	tr|Q49AN9|Q49AN9_HUMAN SNRPG protein OS=Homo sapiens GN=SNRPG PE=1 SV=1;tr|F5H013|F5H013_HUMAN Small nuclear ribonucleoprotein G OS=Homo sapiens GN=SNRPG PE=1 SV=1;sp|P62308|RUXG_HUMAN Small nuclear ribonucleoprotein G OS=Homo sapiens GN=SNRPG PE=1 SV=1;sp	5	3	3	3	0	0	0	1	2	2	0	0	0	1	2	2	0	0	0	1	2	2	31.2	31.2	31.2	7.1013	64	64;68;76;76;96	0	24.034	0	0	0	10.9	20.3
tr|H0YGW7|H0YGW7_HUMAN;sp|Q8NE71|ABCF1_HUMAN	tr|H0YGW7|H0YGW7_HUMAN;sp|Q8NE71|ABCF1_HUMAN	1	2059100	5072200	1	1	1	1	2059100	5072200	3;3	3;3	3;3	tr|H0YGW7|H0YGW7_HUMAN ATP-binding cassette sub-family F member 1 (Fragment) OS=Homo sapiens GN=ABCF1 PE=1 SV=1;sp|Q8NE71|ABCF1_HUMAN ATP-binding cassette sub-family F member 1 OS=Homo sapiens GN=ABCF1 PE=1 SV=2	2	3	3	3	0	0	0	0	2	3	0	0	0	0	2	3	0	0	0	0	2	3	6.9	6.9	6.9	67.55	596	596;845	0	19.891	0	0	0	0	3.9
sp|Q96DI7|SNR40_HUMAN;tr|Q9NSS8|Q9NSS8_HUMAN	sp|Q96DI7|SNR40_HUMAN	1	1	5000300	1	1	1	1	1	5000300	5;2	5;2	5;2	sp|Q96DI7|SNR40_HUMAN U5 small nuclear ribonucleoprotein 40 kDa protein OS=Homo sapiens GN=SNRNP40 PE=1 SV=1	2	5	5	5	0	0	0	0	3	3	0	0	0	0	3	3	0	0	0	0	3	3	16.5	16.5	16.5	39.31	357	357;127	0	31.155	0	0	0	0	10.4
sp|P07355|ANXA2_HUMAN;tr|H0YN42|H0YN42_HUMAN;tr|H0YMU9|H0YMU9_HUMAN;tr|H0YMD0|H0YMD0_HUMAN;sp|A6NMY6|AXA2L_HUMAN;tr|H0YKS4|H0YKS4_HUMAN;tr|H0YMM1|H0YMM1_HUMAN;tr|H0YM50|H0YM50_HUMAN;tr|H0YMW4|H0YMW4_HUMAN;tr|H0YKX9|H0YKX9_HUMAN;tr|H0YMT9|H0YMT9_HUMAN;tr|H0YLV6|H0YLV6_HUMAN;tr|H0YKZ7|H0YKZ7_HUMAN;tr|H0YKL9|H0YKL9_HUMAN;tr|H0YKV8|H0YKV8_HUMAN;tr|H0YN28|H0YN28_HUMAN;tr|H0YNP5|H0YNP5_HUMAN;tr|H0YMD9|…	sp|P07355|ANXA2_HUMAN;tr|H0YN42|H0YN42_HUMAN;tr|H0YMU9|H0YMU9_HUMAN;tr|H0YMD0|H0YMD0_HUMAN;sp|A6NMY6|AXA2L_HUMAN;tr|H0YKS4|H0YKS4_HUMAN;tr|H0YMM1|H0YMM1_HUMAN;tr|H0YM50|H0YM50_HUMAN;tr|H0YMW4|H0YMW4_HUMAN;tr|H0YKX9|H0YKX9_HUMAN;tr|H0YMT9|H0YMT9_HUMAN;tr|H0YLV6|H0YLV6_HUMAN;tr|H0YKZ7|H0YKZ7_HUMAN	1	6370400	4991300	1	1	1	1	6370400	4991300	11;10;9;9;8;8;7;6;6;6;6;6;6;5;5;4;4;4;4;3;3;2;2;1	11;10;9;9;8;8;7;6;6;6;6;6;6;5;5;4;4;4;4;3;3;2;2;1	11;10;9;9;8;8;7;6;6;6;6;6;6;5;5;4;4;4;4;3;3;2;2;1	sp|P07355|ANXA2_HUMAN Annexin A2 OS=Homo sapiens GN=ANXA2 PE=1 SV=2;tr|H0YN42|H0YN42_HUMAN Annexin (Fragment) OS=Homo sapiens GN=ANXA2 PE=1 SV=1;tr|H0YMU9|H0YMU9_HUMAN Annexin OS=Homo sapiens GN=ANXA2 PE=1 SV=1;tr|H0YMD0|H0YMD0_HUMAN Annexin (Fragment) OS=	24	11	11	11	7	0	0	4	3	5	7	0	0	4	3	5	7	0	0	4	3	5	39.8	39.8	39.8	38.604	339	339;256;230;227;339;176;149;248;146;134;133;132;119;110;81;139;175;65;142;79;69;341;59;45	0	77.871	23.9	0	0	12.4	13.3
tr|J3KT86|J3KT86_HUMAN;sp|Q96GD4|AURKB_HUMAN;tr|J3QLN8|J3QLN8_HUMAN;tr|J3QR41|J3QR41_HUMAN;tr|J3KTD6|J3KTD6_HUMAN	tr|J3KT86|J3KT86_HUMAN;sp|Q96GD4|AURKB_HUMAN;tr|J3QLN8|J3QLN8_HUMAN	1	9383400	4924300	1	1	1	1	9383400	4924300	3;3;2;1;1	3;3;2;1;1	3;3;2;1;1	tr|J3KT86|J3KT86_HUMAN Aurora kinase B (Fragment) OS=Homo sapiens GN=AURKB PE=1 SV=1;sp|Q96GD4|AURKB_HUMAN Aurora kinase B OS=Homo sapiens GN=AURKB PE=1 SV=3;tr|J3QLN8|J3QLN8_HUMAN Aurora kinase B (Fragment) OS=Homo sapiens GN=AURKB PE=1 SV=5	5	3	3	3	0	0	0	0	2	3	0	0	0	0	2	3	0	0	0	0	2	3	16.1	16.1	16.1	27.956	242	242;344;231;172;228	0	19.004	0	0	0	0	10.3
tr|H0Y4S9|H0Y4S9_HUMAN;sp|O00505|IMA4_HUMAN	tr|H0Y4S9|H0Y4S9_HUMAN;sp|O00505|IMA4_HUMAN	1	1	4855600	1	1	1	1	1	4855600	2;2	2;2	2;2	tr|H0Y4S9|H0Y4S9_HUMAN Importin subunit alpha-4 (Fragment) OS=Homo sapiens GN=KPNA3 PE=1 SV=1;sp|O00505|IMA4_HUMAN Importin subunit alpha-4 OS=Homo sapiens GN=KPNA3 PE=1 SV=2	2	2	2	2	0	0	0	0	1	2	0	0	0	0	1	2	0	0	0	0	1	2	29.7	29.7	29.7	9.898	91	91;521	0	12.717	0	0	0	0	14.3
sp|Q9BVK6|TMED9_HUMAN	sp|Q9BVK6|TMED9_HUMAN	1	1	4830800	1	1	1	1	1	4830800	1	1	1	sp|Q9BVK6|TMED9_HUMAN Transmembrane emp24 domain-containing protein 9 OS=Homo sapiens GN=TMED9 PE=1 SV=2	1	1	1	1	0	0	1	1	0	1	0	0	1	1	0	1	0	0	1	1	0	1	8.5	8.5	8.5	27.277	235	235	0.0081967	6.29	0	0	8.5	8.5	0
tr|H3BQZ7|H3BQZ7_HUMAN;sp|Q1KMD3|HNRL2_HUMAN	tr|H3BQZ7|H3BQZ7_HUMAN;sp|Q1KMD3|HNRL2_HUMAN	1	5671500	4810600	1	1	1	1	5671500	4810600	4;4	4;4	4;4	tr|H3BQZ7|H3BQZ7_HUMAN HCG2044799 OS=Homo sapiens GN=HNRNPUL2-BSCL2 PE=4 SV=1;sp|Q1KMD3|HNRL2_HUMAN Heterogeneous nuclear ribonucleoprotein U-like protein 2 OS=Homo sapiens GN=HNRNPUL2 PE=1 SV=1	2	4	4	4	0	0	0	1	4	2	0	0	0	1	4	2	0	0	0	1	4	2	7	7	7	84.69	746	746;747	0	31.295	0	0	0	1.9	7
tr|E9PH82|E9PH82_HUMAN;sp|Q8NCA5|FA98A_HUMAN	tr|E9PH82|E9PH82_HUMAN;sp|Q8NCA5|FA98A_HUMAN	1	1	4800700	1	1	1	1	1	4800700	2;2	2;2	2;2	tr|E9PH82|E9PH82_HUMAN Protein FAM98A OS=Homo sapiens GN=FAM98A PE=1 SV=1;sp|Q8NCA5|FA98A_HUMAN Protein FAM98A OS=Homo sapiens GN=FAM98A PE=1 SV=1	2	2	2	2	0	0	0	0	1	2	0	0	0	0	1	2	0	0	0	0	1	2	8.7	8.7	8.7	34.431	312	312;519	0	21.295	0	0	0	0	4.8
sp|Q9NYH9|UTP6_HUMAN	sp|Q9NYH9|UTP6_HUMAN	1	4633700	4796400	1	1	1	1	4633700	4796400	2	2	2	sp|Q9NYH9|UTP6_HUMAN U3 small nucleolar RNA-associated protein 6 homolog OS=Homo sapiens GN=UTP6 PE=2 SV=2	1	2	2	2	0	0	0	0	2	2	0	0	0	0	2	2	0	0	0	0	2	2	4.4	4.4	4.4	70.193	597	597	0	14.979	0	0	0	0	4.4
tr|I3L3P7|I3L3P7_HUMAN;sp|P62244|RS15A_HUMAN;tr|I3L246|I3L246_HUMAN;tr|H3BN98|H3BN98_HUMAN;tr|H3BV27|H3BV27_HUMAN;tr|H3BT37|H3BT37_HUMAN;tr|I3L303|I3L303_HUMAN;tr|H3BVC7|H3BVC7_HUMAN	tr|I3L3P7|I3L3P7_HUMAN;sp|P62244|RS15A_HUMAN;tr|I3L246|I3L246_HUMAN;tr|H3BN98|H3BN98_HUMAN	1	3031000	4759600	1	1	1	1	3031000	4759600	3;3;2;2;1;1;1;1	3;3;2;2;1;1;1;1	3;3;2;2;1;1;1;1	tr|I3L3P7|I3L3P7_HUMAN 40S ribosomal protein S15a OS=Homo sapiens GN=RPS15A PE=1 SV=1;sp|P62244|RS15A_HUMAN 40S ribosomal protein S15a OS=Homo sapiens GN=RPS15A PE=1 SV=2;tr|I3L246|I3L246_HUMAN 40S ribosomal protein S15a OS=Homo sapiens GN=RPS15A PE=1 SV=1	8	3	3	3	0	0	0	0	3	2	0	0	0	0	3	2	0	0	0	0	3	2	33	33	33	11.477	100	100;130;111;237;49;50;52;58	0	18.926	0	0	0	0	33
sp|Q9H6R0|DHX33_HUMAN;tr|I3L1L6|I3L1L6_HUMAN;tr|Q5JXI3|Q5JXI3_HUMAN;tr|I3L0M5|I3L0M5_HUMAN	sp|Q9H6R0|DHX33_HUMAN;tr|I3L1L6|I3L1L6_HUMAN;tr|Q5JXI3|Q5JXI3_HUMAN	1	1	4633900	1	1	1	1	1	4633900	4;2;2;1	4;2;2;1	4;2;2;1	sp|Q9H6R0|DHX33_HUMAN Putative ATP-dependent RNA helicase DHX33 OS=Homo sapiens GN=DHX33 PE=1 SV=2;tr|I3L1L6|I3L1L6_HUMAN Putative ATP-dependent RNA helicase DHX33 (Fragment) OS=Homo sapiens GN=DHX33 PE=1 SV=1;tr|Q5JXI3|Q5JXI3_HUMAN Four and a half LIM dom	4	4	4	4	0	0	0	0	2	3	0	0	0	0	2	3	0	0	0	0	2	3	8.9	8.9	8.9	78.873	707	707;617;795;93	0	25.717	0	0	0	0	5.1
sp|O14965|AURKA_HUMAN;tr|A3KFJ0|A3KFJ0_HUMAN	sp|O14965|AURKA_HUMAN;tr|A3KFJ0|A3KFJ0_HUMAN	1	1	4617000	1	1	1	1	1	4617000	2;1	2;1	2;1	sp|O14965|AURKA_HUMAN Aurora kinase A OS=Homo sapiens GN=AURKA PE=1 SV=2;tr|A3KFJ0|A3KFJ0_HUMAN Aurora kinase A OS=Homo sapiens GN=AURKA PE=1 SV=1	2	2	2	2	0	0	0	0	0	2	0	0	0	0	0	2	0	0	0	0	0	2	7.2	7.2	7.2	45.809	403	403;347	0	13.601	0	0	0	0	0
sp|O60306|AQR_HUMAN	sp|O60306|AQR_HUMAN	1	2918200	4564200	1	1	1	1	2918200	4564200	3	3	3	sp|O60306|AQR_HUMAN Intron-binding protein aquarius OS=Homo sapiens GN=AQR PE=1 SV=4	1	3	3	3	0	0	0	1	3	2	0	0	0	1	3	2	0	0	0	1	3	2	2.8	2.8	2.8	171.29	1485	1485	0	19.374	0	0	0	0.8	2.8
sp|Q92615|LAR4B_HUMAN;tr|H0Y641|H0Y641_HUMAN;tr|H0Y4V9|H0Y4V9_HUMAN	sp|Q92615|LAR4B_HUMAN	1	8159700	4527000	1	1	1	1	8159700	4527000	3;1;1	3;1;1	3;1;1	sp|Q92615|LAR4B_HUMAN La-related protein 4B OS=Homo sapiens GN=LARP4B PE=1 SV=3	3	3	3	3	0	0	0	0	3	2	0	0	0	0	3	2	0	0	0	0	3	2	6	6	6	80.551	738	738;190;339	0	23.462	0	0	0	0	6
sp|Q9Y3B4|SF3B6_HUMAN	sp|Q9Y3B4|SF3B6_HUMAN	1	1	4480700	1	1	1	1	1	4480700	2	2	2	sp|Q9Y3B4|SF3B6_HUMAN Splicing factor 3B subunit 6 OS=Homo sapiens GN=SF3B6 PE=1 SV=1	1	2	2	2	0	0	0	1	1	1	0	0	0	1	1	1	0	0	0	1	1	1	20.8	20.8	20.8	14.585	125	125	0	13.74	0	0	0	11.2	9.6
tr|S4R456|S4R456_HUMAN;tr|K7EM56|K7EM56_HUMAN;tr|A0A0B4J2B4|A0A0B4J2B4_HUMAN;tr|K7EJ78|K7EJ78_HUMAN;tr|S4R417|S4R417_HUMAN;tr|K7EQJ5|K7EQJ5_HUMAN;sp|P62841|RS15_HUMAN;tr|K7ELC2|K7ELC2_HUMAN	tr|S4R456|S4R456_HUMAN;tr|K7EM56|K7EM56_HUMAN;tr|A0A0B4J2B4|A0A0B4J2B4_HUMAN;tr|K7EJ78|K7EJ78_HUMAN;tr|S4R417|S4R417_HUMAN;tr|K7EQJ5|K7EQJ5_HUMAN;sp|P62841|RS15_HUMAN;tr|K7ELC2|K7ELC2_HUMAN	1	7409300	4480300	1	1	1	1	7409300	4480300	2;2;2;2;2;2;2;2	2;2;2;2;2;2;2;2	2;2;2;2;2;2;2;2	tr|S4R456|S4R456_HUMAN 40S ribosomal protein S15 (Fragment) OS=Homo sapiens GN=RPS15 PE=1 SV=1;tr|K7EM56|K7EM56_HUMAN 40S ribosomal protein S15 OS=Homo sapiens GN=RPS15 PE=1 SV=2;tr|A0A0B4J2B4|A0A0B4J2B4_HUMAN 40S ribosomal protein S15 OS=Homo sapiens GN=R	8	2	2	2	0	0	0	0	2	1	0	0	0	0	2	1	0	0	0	0	2	1	45.6	45.6	45.6	8.0266	68	68;112;118;129;135;141;145;152	0	23.091	0	0	0	0	45.6
sp|O75152|ZC11A_HUMAN;tr|E9PBY7|E9PBY7_HUMAN;tr|E9PQ61|E9PQ61_HUMAN	sp|O75152|ZC11A_HUMAN;tr|E9PBY7|E9PBY7_HUMAN;tr|E9PQ61|E9PQ61_HUMAN	1	1	4387900	1	1	1	1	1	4387900	3;2;2	3;2;2	3;2;2	sp|O75152|ZC11A_HUMAN Zinc finger CCCH domain-containing protein 11A OS=Homo sapiens GN=ZC3H11A PE=1 SV=3;tr|E9PBY7|E9PBY7_HUMAN Zinc finger CCCH domain-containing protein 11A (Fragment) OS=Homo sapiens GN=ZC3H11A PE=1 SV=1;tr|E9PQ61|E9PQ61_HUMAN Zinc fing	3	3	3	3	1	0	0	0	0	2	1	0	0	0	0	2	1	0	0	0	0	2	5.6	5.6	5.6	89.13	810	810;515;652	0	17.698	1.6	0	0	0	0
sp|O43660|PLRG1_HUMAN;tr|D6RA26|D6RA26_HUMAN;tr|H0YA24|H0YA24_HUMAN	sp|O43660|PLRG1_HUMAN;tr|D6RA26|D6RA26_HUMAN	1	4852000	4373300	1	1	1	1	4852000	4373300	3;2;1	3;2;1	3;2;1	sp|O43660|PLRG1_HUMAN Pleiotropic regulator 1 OS=Homo sapiens GN=PLRG1 PE=1 SV=1;tr|D6RA26|D6RA26_HUMAN Pleiotropic regulator 1 (Fragment) OS=Homo sapiens GN=PLRG1 PE=1 SV=1	3	3	3	3	0	0	0	0	3	3	0	0	0	0	3	3	0	0	0	0	3	3	7.8	7.8	7.8	57.193	514	514;212;156	0	21.661	0	0	0	0	7.8
sp|P60842|IF4A1_HUMAN;tr|J3QLN6|J3QLN6_HUMAN;tr|J3KS25|J3KS25_HUMAN;tr|J3KTB5|J3KTB5_HUMAN;tr|J3QL43|J3QL43_HUMAN;tr|J3QS69|J3QS69_HUMAN;tr|J3KT12|J3KT12_HUMAN;tr|E7EQG2|E7EQG2_HUMAN;sp|Q14240|IF4A2_HUMAN;tr|J3QR64|J3QR64_HUMAN;tr|J3QKZ9|J3QKZ9_HUMAN;tr|J3KSZ0|J3KSZ0_HUMAN;tr|J3KTN0|J3KTN0_HUMAN	sp|P60842|IF4A1_HUMAN;tr|J3QLN6|J3QLN6_HUMAN;tr|J3KS25|J3KS25_HUMAN;tr|J3KTB5|J3KTB5_HUMAN;tr|J3QL43|J3QL43_HUMAN;tr|J3QS69|J3QS69_HUMAN;tr|J3KT12|J3KT12_HUMAN;tr|E7EQG2|E7EQG2_HUMAN;sp|Q14240|IF4A2_HUMAN;tr|J3QR64|J3QR64_HUMAN;tr|J3QKZ9|J3QKZ9_HUMAN;tr|J3KSZ0|J3KSZ0_HUMAN	1	10400000	4133700	1	1	1	1	10400000	4133700	4;3;3;3;3;3;3;3;3;3;2;2;1	3;2;2;2;2;2;2;2;2;2;1;2;1	3;2;2;2;2;2;2;2;2;2;1;2;1	sp|P60842|IF4A1_HUMAN Eukaryotic initiation factor 4A-I OS=Homo sapiens GN=EIF4A1 PE=1 SV=1;tr|J3QLN6|J3QLN6_HUMAN Eukaryotic initiation factor 4A-I (Fragment) OS=Homo sapiens GN=EIF4A1 PE=1 SV=1;tr|J3KS25|J3KS25_HUMAN Eukaryotic initiation factor 4A-I (Fr	13	4	3	3	0	1	0	1	4	3	0	0	0	1	3	2	0	0	0	1	3	2	13.3	9.4	9.4	46.153	406	406;163;188;257;271;300;341;362;407;459;135;230;117	0	20.62	0	3.9	0	2.5	13.3
sp|P42285|SK2L2_HUMAN;tr|H0YAC4|H0YAC4_HUMAN;tr|H0Y8U3|H0Y8U3_HUMAN	sp|P42285|SK2L2_HUMAN	1	1	4053500	1	1	1	1	1	4053500	3;1;1	3;1;1	3;1;1	sp|P42285|SK2L2_HUMAN Superkiller viralicidic activity 2-like 2 OS=Homo sapiens GN=SKIV2L2 PE=1 SV=3	3	3	3	3	0	0	0	0	3	2	0	0	0	0	3	2	0	0	0	0	3	2	3.5	3.5	3.5	117.8	1042	1042;72;88	0	20.858	0	0	0	0	3.5
sp|Q8TDF6|GRP4_HUMAN;tr|A0A0A0MS18|A0A0A0MS18_HUMAN	sp|Q8TDF6|GRP4_HUMAN	0.611132	1	4048800	5923600	1	1	3620100	1	4048800	6;1	6;1	6;1	sp|Q8TDF6|GRP4_HUMAN RAS guanyl-releasing protein 4 OS=Homo sapiens GN=RASGRP4 PE=1 SV=2	2	6	6	6	4	0	1	4	1	2	4	0	1	4	1	2	4	0	1	4	1	2	5.4	5.4	5.4	155.82	1436	1436;537	0	39.824	3.8	0	1.1	3.6	1.1
sp|Q03252|LMNB2_HUMAN;tr|A8MZF5|A8MZF5_HUMAN	sp|Q03252|LMNB2_HUMAN;tr|A8MZF5|A8MZF5_HUMAN	1.45532	1	3953900	2634400	1	1	3833900	1	3953900	5;5	5;5	5;5	sp|Q03252|LMNB2_HUMAN Lamin-B2 OS=Homo sapiens GN=LMNB2 PE=1 SV=3;tr|A8MZF5|A8MZF5_HUMAN Post-GPI attachment to proteins factor 2 OS=Homo sapiens GN=PGAP2 PE=4 SV=3	2	5	5	5	4	0	1	2	0	3	4	0	1	2	0	3	4	0	1	2	0	3	9.3	9.3	9.3	67.688	600	600;747	0	31.199	7.2	0	1.7	3.8	0
sp|Q9NPE3|NOP10_HUMAN;tr|H0YM60|H0YM60_HUMAN	sp|Q9NPE3|NOP10_HUMAN;tr|H0YM60|H0YM60_HUMAN	1	1	3893600	1	1	1	1	1	3893600	2;1	2;1	2;1	sp|Q9NPE3|NOP10_HUMAN H/ACA ribonucleoprotein complex subunit 3 OS=Homo sapiens GN=NOP10 PE=1 SV=1;tr|H0YM60|H0YM60_HUMAN H/ACA ribonucleoprotein complex subunit 3 OS=Homo sapiens GN=NOP10 PE=1 SV=1	2	2	2	2	0	0	0	0	1	2	0	0	0	0	1	2	0	0	0	0	1	2	37.5	37.5	37.5	7.7059	64	64;36	0	13.711	0	0	0	0	20.3
tr|K7EK06|K7EK06_HUMAN;tr|K7ER16|K7ER16_HUMAN;sp|Q9Y285|SYFA_HUMAN	tr|K7EK06|K7EK06_HUMAN;tr|K7ER16|K7ER16_HUMAN;sp|Q9Y285|SYFA_HUMAN	1	1	3747400	1	1	1	1	1	3747400	1;1;1	1;1;1	1;1;1	tr|K7EK06|K7EK06_HUMAN Phenylalanine--tRNA ligase alpha subunit (Fragment) OS=Homo sapiens GN=FARSA PE=1 SV=5;tr|K7ER16|K7ER16_HUMAN Phenylalanine--tRNA ligase alpha subunit OS=Homo sapiens GN=FARSA PE=1 SV=1;sp|Q9Y285|SYFA_HUMAN Phenylalanine--tRNA ligase	3	1	1	1	0	0	0	0	1	1	0	0	0	0	1	1	0	0	0	0	1	1	6.5	6.5	6.5	18.502	169	169;235;508	0	18.063	0	0	0	0	6.5
tr|E9PK91|E9PK91_HUMAN;tr|H0YF63|H0YF63_HUMAN	tr|E9PK91|E9PK91_HUMAN	1	1	3697100	1	1	1	1	1	3697100	39;8	1;1	1;1	tr|E9PK91|E9PK91_HUMAN Bcl-2-associated transcription factor 1 OS=Homo sapiens GN=BCLAF1 PE=1 SV=1	2	39	1	1	29	20	17	30	21	19	0	1	0	0	0	1	0	1	0	0	0	1	35.7	1.8	1.8	100.4	871	871;126	1	-2	29.6	23.3	18.6	29	22.7
tr|C9JYM0|C9JYM0_HUMAN;sp|O75817|POP7_HUMAN	tr|C9JYM0|C9JYM0_HUMAN;sp|O75817|POP7_HUMAN	1	1	3636400	1	1	1	1	1	3636400	1;1	1;1	1;1	tr|C9JYM0|C9JYM0_HUMAN Ribonuclease P protein subunit p20 (Fragment) OS=Homo sapiens GN=POP7 PE=1 SV=1;sp|O75817|POP7_HUMAN Ribonuclease P protein subunit p20 OS=Homo sapiens GN=POP7 PE=1 SV=2	2	1	1	1	0	0	0	0	1	1	0	0	0	0	1	1	0	0	0	0	1	1	10.9	10.9	10.9	15.324	137	137;140	0.0029412	6.7382	0	0	0	0	10.9
tr|H0Y2W2|H0Y2W2_HUMAN	tr|H0Y2W2|H0Y2W2_HUMAN	1	1	3604400	1	1	1	1	1	3604400	8	1	0	tr|H0Y2W2|H0Y2W2_HUMAN ATPase family AAA domain-containing protein 3A (Fragment) OS=Homo sapiens GN=ATAD3A PE=1 SV=1	1	8	1	0	3	0	0	0	5	6	1	0	0	0	0	1	0	0	0	0	0	0	18.9	2.1	0	64.243	572	572	0.0058224	6.6253	5.4	0	0	0	12.8
CON__Q3ZBS7;sp|P04004|VTNC_HUMAN	CON__Q3ZBS7;sp|P04004|VTNC_HUMAN	1	4638800	3559800	1	1	1	1	4638800	3559800	2;1	2;1	2;1	;sp|P04004|VTNC_HUMAN Vitronectin OS=Homo sapiens GN=VTN PE=1 SV=1	2	2	2	2	0	0	0	0	2	2	0	0	0	0	2	2	0	0	0	0	2	2	5.6	5.6	5.6	54.099	484	484;478	0	14.119	0	0	0	0	5.6
tr|F8WAJ0|F8WAJ0_HUMAN;sp|Q9H8H2|DDX31_HUMAN	tr|F8WAJ0|F8WAJ0_HUMAN;sp|Q9H8H2|DDX31_HUMAN	1	1	3559200	1	1	1	1	1	3559200	2;2	2;2	2;2	tr|F8WAJ0|F8WAJ0_HUMAN Probable ATP-dependent RNA helicase DDX31 OS=Homo sapiens GN=DDX31 PE=1 SV=2;sp|Q9H8H2|DDX31_HUMAN Probable ATP-dependent RNA helicase DDX31 OS=Homo sapiens GN=DDX31 PE=2 SV=2	2	2	2	2	0	0	0	0	0	2	0	0	0	0	0	2	0	0	0	0	0	2	4	4	4	83.515	746	746;851	0	14.052	0	0	0	0	0
tr|A0A0A0MQS1|A0A0A0MQS1_HUMAN;sp|Q7L014|DDX46_HUMAN;tr|A0A0C4DG89|A0A0C4DG89_HUMAN	tr|A0A0A0MQS1|A0A0A0MQS1_HUMAN;sp|Q7L014|DDX46_HUMAN;tr|A0A0C4DG89|A0A0C4DG89_HUMAN	1	1	3540600	1	1	1	1	1	3540600	2;2;2	2;2;2	2;2;2	tr|A0A0A0MQS1|A0A0A0MQS1_HUMAN Pyrroline-5-carboxylate reductase OS=Homo sapiens GN=PYCRL PE=1 SV=1;sp|Q7L014|DDX46_HUMAN Probable ATP-dependent RNA helicase DDX46 OS=Homo sapiens GN=DDX46 PE=1 SV=2;tr|A0A0C4DG89|A0A0C4DG89_HUMAN Probable ATP-dependent RNA	3	2	2	2	0	0	0	0	1	1	0	0	0	0	1	1	0	0	0	0	1	1	2.2	2.2	2.2	92.549	862	862;1031;1032	0	11.547	0	0	0	0	1.3
sp|O43172|PRP4_HUMAN	sp|O43172|PRP4_HUMAN	1	1	3329600	1	1	1	1	1	3329600	3	3	3	sp|O43172|PRP4_HUMAN U4/U6 small nuclear ribonucleoprotein Prp4 OS=Homo sapiens GN=PRPF4 PE=1 SV=2	1	3	3	3	0	0	0	0	2	2	0	0	0	0	2	2	0	0	0	0	2	2	7.5	7.5	7.5	58.449	522	522	0	20.27	0	0	0	0	5
sp|Q8N163|CCAR2_HUMAN;tr|H0YC69|H0YC69_HUMAN;tr|E5RFJ3|E5RFJ3_HUMAN;tr|H0YC58|H0YC58_HUMAN;tr|E5RGU7|E5RGU7_HUMAN;tr|E5RHJ4|E5RHJ4_HUMAN;tr|G3V119|G3V119_HUMAN;tr|H0YB24|H0YB24_HUMAN	sp|Q8N163|CCAR2_HUMAN;tr|H0YC69|H0YC69_HUMAN;tr|E5RFJ3|E5RFJ3_HUMAN;tr|H0YC58|H0YC58_HUMAN	1.89131	5086900	3292200	3566000	1	1	6744400	5086900	3292200	5;3;3;3;2;2;1;1	5;3;3;3;2;2;1;1	5;3;3;3;2;2;1;1	sp|Q8N163|CCAR2_HUMAN Cell cycle and apoptosis regulator protein 2 OS=Homo sapiens GN=CCAR2 PE=1 SV=2;tr|H0YC69|H0YC69_HUMAN Cell cycle and apoptosis regulator protein 2 (Fragment) OS=Homo sapiens GN=CCAR2 PE=1 SV=1;tr|E5RFJ3|E5RFJ3_HUMAN Cell cycle and ap	8	5	5	5	3	0	0	4	3	2	3	0	0	4	3	2	3	0	0	4	3	2	7.5	7.5	7.5	102.9	923	923;148;162;183;150;277;598;615	0	33.163	4.8	0	0	6	4.9
sp|Q9P031|TAP26_HUMAN;tr|F8VNY5|F8VNY5_HUMAN	sp|Q9P031|TAP26_HUMAN;tr|F8VNY5|F8VNY5_HUMAN	1	1	3258500	1	1	1	1	1	3258500	1;1	1;1	1;1	sp|Q9P031|TAP26_HUMAN Thyroid transcription factor 1-associated protein 26 OS=Homo sapiens GN=CCDC59 PE=1 SV=2;tr|F8VNY5|F8VNY5_HUMAN Thyroid transcription factor 1-associated protein 26 (Fragment) OS=Homo sapiens GN=CCDC59 PE=1 SV=1	2	1	1	1	0	0	0	0	1	1	0	0	0	0	1	1	0	0	0	0	1	1	7.5	7.5	7.5	28.669	241	241;628	0.0043796	6.649	0	0	0	0	7.5
sp|Q5C9Z4|NOM1_HUMAN	sp|Q5C9Z4|NOM1_HUMAN	1	3255500	3215400	1	1	1	1	3255500	3215400	4	4	4	sp|Q5C9Z4|NOM1_HUMAN Nucleolar MIF4G domain-containing protein 1 OS=Homo sapiens GN=NOM1 PE=1 SV=1	1	4	4	4	0	0	0	0	3	3	0	0	0	0	3	3	0	0	0	0	3	3	5.9	5.9	5.9	96.256	860	860	0	23.47	0	0	0	0	4.5
tr|E9PMI6|E9PMI6_HUMAN;tr|E9PJF4|E9PJF4_HUMAN;tr|J3KN38|J3KN38_HUMAN;sp|P54105|ICLN_HUMAN	tr|E9PMI6|E9PMI6_HUMAN;tr|E9PJF4|E9PJF4_HUMAN;tr|J3KN38|J3KN38_HUMAN;sp|P54105|ICLN_HUMAN	1	1	3067900	1	1	1	1	1	3067900	1;1;1;1	1;1;1;1	1;1;1;1	tr|E9PMI6|E9PMI6_HUMAN Methylosome subunit pICln OS=Homo sapiens GN=CLNS1A PE=1 SV=1;tr|E9PJF4|E9PJF4_HUMAN Methylosome subunit pICln OS=Homo sapiens GN=CLNS1A PE=1 SV=1;tr|J3KN38|J3KN38_HUMAN Methylosome subunit pICln OS=Homo sapiens GN=CLNS1A PE=1 SV=1;s	4	1	1	1	1	1	1	1	1	1	1	1	1	1	1	1	1	1	1	1	1	1	7.8	7.8	7.8	18.259	167	167;179;203;237	0.0016393	9.5233	7.8	7.8	7.8	7.8	7.8
tr|E7EVI1|E7EVI1_HUMAN;tr|E5RFK1|E5RFK1_HUMAN	tr|E7EVI1|E7EVI1_HUMAN	1	1	2978100	1	1	1	1	1	2978100	13;1	3;1	0;0	tr|E7EVI1|E7EVI1_HUMAN Double-stranded RNA-binding protein Staufen homolog 2 OS=Homo sapiens GN=STAU2 PE=1 SV=1	2	13	3	0	7	5	5	7	9	9	0	0	0	0	1	3	0	0	0	0	0	0	22.5	5.5	0	68.296	636	636;204	0	18.823	14.5	8	6.4	14.5	12.7
sp|P02747|C1QC_HUMAN;tr|Q4ZFW0|Q4ZFW0_HUMAN;tr|H0YF45|H0YF45_HUMAN	sp|P02747|C1QC_HUMAN;tr|Q4ZFW0|Q4ZFW0_HUMAN;tr|H0YF45|H0YF45_HUMAN	1	1	2940900	1	1	1	1	1	2940900	2;1;1	2;1;1	2;1;1	sp|P02747|C1QC_HUMAN Complement C1q subcomponent subunit C OS=Homo sapiens GN=C1QC PE=1 SV=3;tr|Q4ZFW0|Q4ZFW0_HUMAN Putative uncharacterized protein DKFZP564A2416 (Fragment) OS=Homo sapiens GN=DKFZP564A2416 PE=1 SV=1;tr|H0YF45|H0YF45_HUMAN ADP-ribosylation	3	2	2	2	1	0	0	1	1	2	1	0	0	1	1	2	1	0	0	1	1	2	5.3	5.3	5.3	68.538	643	643;308;423	0	13.11	2.2	0	0	2.2	2.2
sp|Q53F19|CQ085_HUMAN	sp|Q53F19|CQ085_HUMAN	1	1	2929000	1	1	1	1	1	2929000	2	2	2	sp|Q53F19|CQ085_HUMAN Uncharacterized protein C17orf85 OS=Homo sapiens GN=C17orf85 PE=1 SV=2	1	2	2	2	0	0	0	0	1	2	0	0	0	0	1	2	0	0	0	0	1	2	4.2	4.2	4.2	70.592	620	620	0	12.701	0	0	0	0	2.1
sp|Q9BU76|MMTA2_HUMAN	sp|Q9BU76|MMTA2_HUMAN	1	1	2872400	1	1	1	1	1	2872400	1	1	1	sp|Q9BU76|MMTA2_HUMAN Multiple myeloma tumor-associated protein 2 OS=Homo sapiens GN=MMTAG2 PE=1 SV=1	1	1	1	1	0	0	0	0	1	1	0	0	0	0	1	1	0	0	0	0	1	1	4.9	4.9	4.9	29.411	263	263	0.0029586	6.7865	0	0	0	0	4.9
tr|D6R9P3|D6R9P3_HUMAN;tr|D6RD18|D6RD18_HUMAN;tr|D6RBZ0|D6RBZ0_HUMAN;tr|A0A087WZV1|A0A087WZV1_HUMAN;sp|Q99729|ROAA_HUMAN	tr|D6R9P3|D6R9P3_HUMAN;tr|D6RD18|D6RD18_HUMAN;tr|D6RBZ0|D6RBZ0_HUMAN;tr|A0A087WZV1|A0A087WZV1_HUMAN;sp|Q99729|ROAA_HUMAN	1	1	2749300	1	1	1	1	1	2749300	2;2;2;2;1	2;2;2;2;1	2;2;2;2;1	tr|D6R9P3|D6R9P3_HUMAN Heterogeneous nuclear ribonucleoprotein A/B OS=Homo sapiens GN=HNRNPAB PE=1 SV=1;tr|D6RD18|D6RD18_HUMAN Heterogeneous nuclear ribonucleoprotein A/B OS=Homo sapiens GN=HNRNPAB PE=1 SV=1;tr|D6RBZ0|D6RBZ0_HUMAN Heterogeneous nuclear rib	5	2	2	2	0	0	0	1	1	2	0	0	0	1	1	2	0	0	0	1	1	2	7.9	7.9	7.9	30.302	280	280;283;327;330;332	0	12.535	0	0	0	5	2.9
sp|Q5QFB9|PAPAS_HUMAN	sp|Q5QFB9|PAPAS_HUMAN	1	1	2647500	1	1	1	1	1	2647500	1	1	1	sp|Q5QFB9|PAPAS_HUMAN Protein PAPPAS OS=Homo sapiens GN=PAPPA-AS1 PE=5 SV=1	1	1	1	1	1	0	0	0	1	1	1	0	0	0	1	1	1	0	0	0	1	1	1.6	1.6	1.6	86.886	772	772	0.0056497	6.4547	1.6	0	0	0	1.6
sp|Q8NB90|SPAT5_HUMAN	sp|Q8NB90|SPAT5_HUMAN	1	2211000	2533600	1	1	1	1	2211000	2533600	2	2	2	sp|Q8NB90|SPAT5_HUMAN Spermatogenesis-associated protein 5 OS=Homo sapiens GN=SPATA5 PE=1 SV=3	1	2	2	2	0	0	0	0	2	2	0	0	0	0	2	2	0	0	0	0	2	2	2.9	2.9	2.9	97.903	893	893	0	12.457	0	0	0	0	2.9
sp|Q9Y295|DRG1_HUMAN;tr|H0YI06|H0YI06_HUMAN	sp|Q9Y295|DRG1_HUMAN	1	1	2526900	1	1	1	1	1	2526900	3;1	3;1	3;1	sp|Q9Y295|DRG1_HUMAN Developmentally-regulated GTP-binding protein 1 OS=Homo sapiens GN=DRG1 PE=1 SV=1	2	3	3	3	0	0	0	0	1	2	0	0	0	0	1	2	0	0	0	0	1	2	11.4	11.4	11.4	40.542	367	367;56	0	18.845	0	0	0	0	4.4
sp|Q96AG4|LRC59_HUMAN	sp|Q96AG4|LRC59_HUMAN	1	1	2465100	1	1	1	1	1	2465100	1	1	1	sp|Q96AG4|LRC59_HUMAN Leucine-rich repeat-containing protein 59 OS=Homo sapiens GN=LRRC59 PE=1 SV=1	1	1	1	1	0	0	0	0	1	1	0	0	0	0	1	1	0	0	0	0	1	1	3.9	3.9	3.9	34.93	307	307	0.0014903	6.8726	0	0	0	0	3.9
tr|A0A0A0MTC4|A0A0A0MTC4_HUMAN;tr|E9PH62|E9PH62_HUMAN;sp|Q9NUL3|STAU2_HUMAN;tr|A0A0A0MTC5|A0A0A0MTC5_HUMAN;tr|E5RJN7|E5RJN7_HUMAN;tr|A0A0A0MTD1|A0A0A0MTD1_HUMAN;tr|F8VPI7|F8VPI7_HUMAN;tr|E7EPX0|E7EPX0_HUMAN;tr|A0A0A0MTC6|A0A0A0MTC6_HUMAN;tr|E7EVJ4|E7EVJ4_HUMAN;tr|G5EA18|G5EA18_HUMAN;tr|E5RJ67|E5RJ67_HUMAN;tr|H0YBY0|H0YBY0_HUMAN	tr|A0A0A0MTC4|A0A0A0MTC4_HUMAN;tr|E9PH62|E9PH62_HUMAN;sp|Q9NUL3|STAU2_HUMAN;tr|A0A0A0MTC5|A0A0A0MTC5_HUMAN;tr|E5RJN7|E5RJN7_HUMAN;tr|A0A0A0MTD1|A0A0A0MTD1_HUMAN;tr|F8VPI7|F8VPI7_HUMAN;tr|E7EPX0|E7EPX0_HUMAN;tr|A0A0A0MTC6|A0A0A0MTC6_HUMAN;tr|E7EVJ4|E7EVJ4_HUMAN;tr|G5EA18|G5EA18_HUMAN	1	2546400	2440900	1	1	1	1	2546400	2440900	6;6;6;6;5;5;5;5;5;5;4;2;2	3;3;3;3;2;2;2;2;2;2;2;2;2	3;3;3;3;2;2;2;2;2;2;2;2;2	tr|A0A0A0MTC4|A0A0A0MTC4_HUMAN Double-stranded RNA-binding protein Staufen homolog 2 OS=Homo sapiens GN=STAU2 PE=1 SV=1;tr|E9PH62|E9PH62_HUMAN Double-stranded RNA-binding protein Staufen homolog 2 OS=Homo sapiens GN=STAU2 PE=1 SV=1;sp|Q9NUL3|STAU2_HUMAN Do	13	6	3	3	0	0	0	0	3	6	0	0	0	0	2	3	0	0	0	0	2	3	20.6	11.8	11.8	43.278	398	398;538;570;862;320;473;479;491;504;511;291;135;162	0	19.147	0	0	0	0	12.1
tr|F2Z2V2|F2Z2V2_HUMAN;sp|Q8NI27|THOC2_HUMAN	tr|F2Z2V2|F2Z2V2_HUMAN;sp|Q8NI27|THOC2_HUMAN	1	1	2423300	1	1	1	1	1	2423300	1;1	1;1	1;1	tr|F2Z2V2|F2Z2V2_HUMAN THO complex subunit 2 OS=Homo sapiens GN=THOC2 PE=1 SV=1;sp|Q8NI27|THOC2_HUMAN THO complex subunit 2 OS=Homo sapiens GN=THOC2 PE=1 SV=2	2	1	1	1	0	1	1	0	0	1	0	1	1	0	0	1	0	1	1	0	0	1	10.8	10.8	10.8	13.865	120	120;1593	0.0016026	8.107	0	10.8	10.8	0	0
sp|Q96GM8|TOE1_HUMAN	sp|Q96GM8|TOE1_HUMAN	1	1	2420500	1	1	1	1	1	2420500	2	2	2	sp|Q96GM8|TOE1_HUMAN Target of EGR1 protein 1 OS=Homo sapiens GN=TOE1 PE=1 SV=1	1	2	2	2	0	0	0	0	1	2	0	0	0	0	1	2	0	0	0	0	1	2	7.3	7.3	7.3	56.547	510	510	0	15.157	0	0	0	0	4.3
tr|H0YFY6|H0YFY6_HUMAN;tr|A0A087WY61|A0A087WY61_HUMAN;sp|Q14980|NUMA1_HUMAN;tr|K4DIE0|K4DIE0_HUMAN	tr|H0YFY6|H0YFY6_HUMAN;tr|A0A087WY61|A0A087WY61_HUMAN;sp|Q14980|NUMA1_HUMAN	1	1660500	2334600	1	1	1	1	1660500	2334600	3;3;3;1	3;3;3;1	3;3;3;1	tr|H0YFY6|H0YFY6_HUMAN Nuclear mitotic apparatus protein 1 (Fragment) OS=Homo sapiens GN=NUMA1 PE=1 SV=1;tr|A0A087WY61|A0A087WY61_HUMAN Nuclear mitotic apparatus protein 1 OS=Homo sapiens GN=NUMA1 PE=1 SV=1;sp|Q14980|NUMA1_HUMAN Nuclear mitotic apparatus p	4	3	3	3	0	0	0	0	3	2	0	0	0	0	3	2	0	0	0	0	3	2	4.8	4.8	4.8	107.3	964	964;2099;2115;353	0	21.906	0	0	0	0	4.8
tr|H7BYN4|H7BYN4_HUMAN;sp|Q02241|KIF23_HUMAN	tr|H7BYN4|H7BYN4_HUMAN;sp|Q02241|KIF23_HUMAN	1	1	2331900	1	1	1	1	1	2331900	1;1	1;1	1;1	tr|H7BYN4|H7BYN4_HUMAN Kinesin-like protein OS=Homo sapiens GN=KIF23 PE=1 SV=1;sp|Q02241|KIF23_HUMAN Kinesin-like protein KIF23 OS=Homo sapiens GN=KIF23 PE=1 SV=3	2	1	1	1	0	0	0	0	1	1	0	0	0	0	1	1	0	0	0	0	1	1	1.4	1.4	1.4	109.13	952	952;960	0.0015552	7.3263	0	0	0	0	1.4
sp|Q15782|CH3L2_HUMAN;tr|J3QRJ1|J3QRJ1_HUMAN;tr|H7C408|H7C408_HUMAN;tr|C9JW33|C9JW33_HUMAN	sp|Q15782|CH3L2_HUMAN;tr|J3QRJ1|J3QRJ1_HUMAN	1	5364700	2237900	1	1	1	1	5364700	2237900	5;3;2;1	5;3;2;1	5;3;2;1	sp|Q15782|CH3L2_HUMAN Chitinase-3-like protein 2 OS=Homo sapiens GN=CHI3L2 PE=1 SV=1;tr|J3QRJ1|J3QRJ1_HUMAN Secernin-2 OS=Homo sapiens GN=SCRN2 PE=1 SV=1	4	5	5	5	2	1	0	0	3	2	2	1	0	0	3	2	2	1	0	0	3	2	7.3	7.3	7.3	112.58	1051	1051;605;576;465	0	31.568	2	2.4	0	0	5.3
tr|C9JA69|C9JA69_HUMAN;sp|Q8WY36|BBX_HUMAN	tr|C9JA69|C9JA69_HUMAN;sp|Q8WY36|BBX_HUMAN	1	2687700	2186100	1	1	1	1	2687700	2186100	3;3	3;3	3;3	tr|C9JA69|C9JA69_HUMAN HMG box transcription factor BBX OS=Homo sapiens GN=BBX PE=1 SV=1;sp|Q8WY36|BBX_HUMAN HMG box transcription factor BBX OS=Homo sapiens GN=BBX PE=1 SV=1	2	3	3	3	0	0	0	0	2	3	0	0	0	0	2	3	0	0	0	0	2	3	4.6	4.6	4.6	99.328	891	891;941	0	17.669	0	0	0	0	2.9
tr|B5MCP9|B5MCP9_HUMAN;sp|P62081|RS7_HUMAN	tr|B5MCP9|B5MCP9_HUMAN;sp|P62081|RS7_HUMAN	1	1	2178700	1	1	1	1	1	2178700	1;1	1;1	1;1	tr|B5MCP9|B5MCP9_HUMAN 40S ribosomal protein S7 OS=Homo sapiens GN=RPS7 PE=1 SV=1;sp|P62081|RS7_HUMAN 40S ribosomal protein S7 OS=Homo sapiens GN=RPS7 PE=1 SV=1	2	1	1	1	0	0	0	0	0	1	0	0	0	0	0	1	0	0	0	0	0	1	6.4	6.4	6.4	21.312	187	187;194	0.0015361	7.0855	0	0	0	0	0
sp|P31153|METK2_HUMAN;sp|Q00266|METK1_HUMAN	sp|P31153|METK2_HUMAN;sp|Q00266|METK1_HUMAN	1	1	2160400	1	1	1	1	1	2160400	2;1	2;1	2;1	sp|P31153|METK2_HUMAN S-adenosylmethionine synthase isoform type-2 OS=Homo sapiens GN=MAT2A PE=1 SV=1;sp|Q00266|METK1_HUMAN S-adenosylmethionine synthase isoform type-1 OS=Homo sapiens GN=MAT1A PE=1 SV=2	2	2	2	2	0	0	0	1	1	2	0	0	0	1	1	2	0	0	0	1	1	2	6.6	6.6	6.6	43.66	395	395;395	0	13.754	0	0	0	3.8	3.8
sp|Q12874|SF3A3_HUMAN	sp|Q12874|SF3A3_HUMAN	1	1	2137300	1	1	1	1	1	2137300	1	1	1	sp|Q12874|SF3A3_HUMAN Splicing factor 3A subunit 3 OS=Homo sapiens GN=SF3A3 PE=1 SV=1	1	1	1	1	1	0	1	0	1	1	1	0	1	0	1	1	1	0	1	0	1	1	2.4	2.4	2.4	58.848	501	501	0.0016	8.0978	2.4	0	2.4	0	2.4
sp|O43670|ZN207_HUMAN;tr|J3QRS9|J3QRS9_HUMAN;tr|X6R4W8|X6R4W8_HUMAN;tr|J3QS27|J3QS27_HUMAN;tr|J3KTL1|J3KTL1_HUMAN;tr|J3KRB6|J3KRB6_HUMAN;tr|J3KRW6|J3KRW6_HUMAN;tr|H0Y3M2|H0Y3M2_HUMAN;tr|J3KS31|J3KS31_HUMAN	sp|O43670|ZN207_HUMAN;tr|J3QRS9|J3QRS9_HUMAN;tr|X6R4W8|X6R4W8_HUMAN;tr|J3QS27|J3QS27_HUMAN;tr|J3KTL1|J3KTL1_HUMAN;tr|J3KRB6|J3KRB6_HUMAN;tr|J3KRW6|J3KRW6_HUMAN;tr|H0Y3M2|H0Y3M2_HUMAN;tr|J3KS31|J3KS31_HUMAN	1	1	2118000	1	1	1	1	1	2118000	2;2;2;1;1;1;1;1;1	2;2;2;1;1;1;1;1;1	2;2;2;1;1;1;1;1;1	sp|O43670|ZN207_HUMAN BUB3-interacting and GLEBS motif-containing protein ZNF207 OS=Homo sapiens GN=ZNF207 PE=1 SV=1;tr|J3QRS9|J3QRS9_HUMAN BUB3-interacting and GLEBS motif-containing protein ZNF207 OS=Homo sapiens GN=ZNF207 PE=1 SV=1;tr|X6R4W8|X6R4W8_HUMA	9	2	2	2	0	0	0	0	1	2	0	0	0	0	1	2	0	0	0	0	1	2	5.4	5.4	5.4	50.75	478	478;493;497;46;74;93;96;198;341	0	12.254	0	0	0	0	2.7
CON__P02662	CON__P02662	1	1	2038600	1	1	1	1	1	2038600	1	1	1		1	1	1	1	1	1	1	1	1	1	1	1	1	1	1	1	1	1	1	1	1	1	6	6	6	22.975	199	199	0.0015773	7.5869	6	6	6	6	6
tr|B4DT28|B4DT28_HUMAN;sp|O43390|HNRPR_HUMAN	tr|B4DT28|B4DT28_HUMAN;sp|O43390|HNRPR_HUMAN	1	1	2032200	1	1	1	1	1	2032200	1;1	1;1	1;1	tr|B4DT28|B4DT28_HUMAN Heterogeneous nuclear ribonucleoprotein R OS=Homo sapiens GN=HNRNPR PE=1 SV=1;sp|O43390|HNRPR_HUMAN Heterogeneous nuclear ribonucleoprotein R OS=Homo sapiens GN=HNRNPR PE=1 SV=1	2	1	1	1	0	0	0	0	0	1	0	0	0	0	0	1	0	0	0	0	0	1	2.6	2.6	2.6	55.717	494	494;633	0.0016367	9.3673	0	0	0	0	0
sp|Q9UHI6|DDX20_HUMAN	sp|Q9UHI6|DDX20_HUMAN	1	1	2008300	1	1	1	1	1	2008300	2	2	2	sp|Q9UHI6|DDX20_HUMAN Probable ATP-dependent RNA helicase DDX20 OS=Homo sapiens GN=DDX20 PE=1 SV=2	1	2	2	2	0	0	0	0	1	1	0	0	0	0	1	1	0	0	0	0	1	1	3.5	3.5	3.5	92.239	824	824	0	13.566	0	0	0	0	1.8
sp|Q9Y3F4|STRAP_HUMAN	sp|Q9Y3F4|STRAP_HUMAN	1	1	1986000	1	1	1	1	1	1986000	2	2	2	sp|Q9Y3F4|STRAP_HUMAN Serine-threonine kinase receptor-associated protein OS=Homo sapiens GN=STRAP PE=1 SV=1	1	2	2	2	0	0	0	0	0	2	0	0	0	0	0	2	0	0	0	0	0	2	10	10	10	38.438	350	350	0	13.468	0	0	0	0	0
sp|Q96SB4|SRPK1_HUMAN;tr|H3BLV9|H3BLV9_HUMAN;tr|Q5R363|Q5R363_HUMAN;tr|D6RBM8|D6RBM8_HUMAN	sp|Q96SB4|SRPK1_HUMAN;tr|H3BLV9|H3BLV9_HUMAN;tr|Q5R363|Q5R363_HUMAN;tr|D6RBM8|D6RBM8_HUMAN	1	1	1979600	1	1	1	1	1	1979600	2;2;2;1	2;2;2;1	2;2;2;1	sp|Q96SB4|SRPK1_HUMAN SRSF protein kinase 1 OS=Homo sapiens GN=SRPK1 PE=1 SV=2;tr|H3BLV9|H3BLV9_HUMAN SRSF protein kinase 1 (Fragment) OS=Homo sapiens GN=SRPK1 PE=1 SV=1;tr|Q5R363|Q5R363_HUMAN SRSF protein kinase 1 OS=Homo sapiens GN=SRPK1 PE=1 SV=2;tr|D6R	4	2	2	2	0	0	0	0	1	1	0	0	0	0	1	1	0	0	0	0	1	1	4.3	4.3	4.3	74.324	655	655;671;826;155	0	11.534	0	0	0	0	2.1
tr|B0QYA4|B0QYA4_HUMAN;tr|B0QYA5|B0QYA5_HUMAN;sp|O15371|EIF3D_HUMAN	tr|B0QYA4|B0QYA4_HUMAN;tr|B0QYA5|B0QYA5_HUMAN;sp|O15371|EIF3D_HUMAN	1	1	1972400	1	1	1	1	1	1972400	1;1;1	1;1;1	1;1;1	tr|B0QYA4|B0QYA4_HUMAN Eukaryotic translation initiation factor 3 subunit D (Fragment) OS=Homo sapiens GN=EIF3D PE=1 SV=2;tr|B0QYA5|B0QYA5_HUMAN Eukaryotic translation initiation factor 3 subunit D (Fragment) OS=Homo sapiens GN=EIF3D PE=1 SV=1;sp|O15371|EI	3	1	1	1	1	0	0	0	1	1	1	0	0	0	1	1	1	0	0	0	1	1	13.3	13.3	13.3	11.772	105	105;269;548	0.0015267	7.0659	13.3	0	0	0	13.3
tr|A0A0A0MSP6|A0A0A0MSP6_HUMAN;tr|H7C3A1|H7C3A1_HUMAN;sp|Q9BXP5|SRRT_HUMAN	tr|A0A0A0MSP6|A0A0A0MSP6_HUMAN;tr|H7C3A1|H7C3A1_HUMAN;sp|Q9BXP5|SRRT_HUMAN	1	1	1966900	1	1	1	1	1	1966900	1;1;1	1;1;1	1;1;1	tr|A0A0A0MSP6|A0A0A0MSP6_HUMAN Serrate RNA effector molecule homolog (Fragment) OS=Homo sapiens GN=SRRT PE=1 SV=3;tr|H7C3A1|H7C3A1_HUMAN Serrate RNA effector molecule homolog (Fragment) OS=Homo sapiens GN=SRRT PE=1 SV=1;sp|Q9BXP5|SRRT_HUMAN Serrate RNA eff	3	1	1	1	0	0	0	0	1	1	0	0	0	0	1	1	0	0	0	0	1	1	8.7	8.7	8.7	16.536	149	149;499;876	0.001634	9.3138	0	0	0	0	8.7
tr|D6RIC3|D6RIC3_HUMAN;sp|Q9Y3C1|NOP16_HUMAN;tr|A0A0C4DGU5|A0A0C4DGU5_HUMAN;tr|A0A087X2G6|A0A087X2G6_HUMAN;tr|A0A087X1T1|A0A087X1T1_HUMAN;tr|D6RC60|D6RC60_HUMAN	tr|D6RIC3|D6RIC3_HUMAN;sp|Q9Y3C1|NOP16_HUMAN;tr|A0A0C4DGU5|A0A0C4DGU5_HUMAN;tr|A0A087X2G6|A0A087X2G6_HUMAN;tr|A0A087X1T1|A0A087X1T1_HUMAN	1	1	1966800	1	1	1	1	1	1966800	3;3;3;3;2;1	3;3;3;3;2;1	3;3;3;3;2;1	tr|D6RIC3|D6RIC3_HUMAN Nucleolar protein 16 OS=Homo sapiens GN=NOP16 PE=1 SV=1;sp|Q9Y3C1|NOP16_HUMAN Nucleolar protein 16 OS=Homo sapiens GN=NOP16 PE=1 SV=2;tr|A0A0C4DGU5|A0A0C4DGU5_HUMAN Nucleolar protein 16 OS=Homo sapiens GN=NOP16 PE=1 SV=1;tr|A0A087X2G	6	3	3	3	0	0	0	0	2	2	0	0	0	0	2	2	0	0	0	0	2	2	28	28	28	17.198	150	150;178;231;237;236;95	0	18.655	0	0	0	0	18.7
sp|Q9BVQ7|SPA5L_HUMAN	sp|Q9BVQ7|SPA5L_HUMAN	1	1	1951800	1	1	1	1	1	1951800	2	2	2	sp|Q9BVQ7|SPA5L_HUMAN Spermatogenesis-associated protein 5-like protein 1 OS=Homo sapiens GN=SPATA5L1 PE=1 SV=2	1	2	2	2	0	0	0	0	1	2	0	0	0	0	1	2	0	0	0	0	1	2	3.1	3.1	3.1	80.709	753	753	0	12.688	0	0	0	0	1.5
tr|H7C109|H7C109_HUMAN;sp|Q6P158|DHX57_HUMAN	tr|H7C109|H7C109_HUMAN;sp|Q6P158|DHX57_HUMAN	1	1	1950900	1	1	1	1	1	1950900	1;1	1;1	1;1	tr|H7C109|H7C109_HUMAN Putative ATP-dependent RNA helicase DHX57 (Fragment) OS=Homo sapiens GN=DHX57 PE=1 SV=1;sp|Q6P158|DHX57_HUMAN Putative ATP-dependent RNA helicase DHX57 OS=Homo sapiens GN=DHX57 PE=1 SV=2	2	1	1	1	0	0	0	0	1	1	0	0	0	0	1	1	0	0	0	0	1	1	2.4	2.4	2.4	74.934	665	665;1386	0.0069348	6.3665	0	0	0	0	2.4
sp|P78346|RPP30_HUMAN;tr|Q5VU11|Q5VU11_HUMAN;tr|Q5VU10|Q5VU10_HUMAN	sp|P78346|RPP30_HUMAN;tr|Q5VU11|Q5VU11_HUMAN	1	1	1914000	1	1	1	1	1	1914000	3;3;1	3;3;1	3;3;1	sp|P78346|RPP30_HUMAN Ribonuclease P protein subunit p30 OS=Homo sapiens GN=RPP30 PE=1 SV=1;tr|Q5VU11|Q5VU11_HUMAN Ribonuclease P protein subunit p30 (Fragment) OS=Homo sapiens GN=RPP30 PE=1 SV=1	3	3	3	3	0	0	0	0	2	1	0	0	0	0	2	1	0	0	0	0	2	1	12.7	12.7	12.7	29.321	268	268;254;212	0	17.86	0	0	0	0	9.3
sp|Q96BK5|PINX1_HUMAN	sp|Q96BK5|PINX1_HUMAN	1	1	1905500	1	1	1	1	1	1905500	1	1	1	sp|Q96BK5|PINX1_HUMAN PIN2/TERF1-interacting telomerase inhibitor 1 OS=Homo sapiens GN=PINX1 PE=1 SV=2	1	1	1	1	0	0	0	0	1	1	0	0	0	0	1	1	0	0	0	0	1	1	5.8	5.8	5.8	37.034	328	328	0.0015083	6.9967	0	0	0	0	5.8
sp|Q14331|FRG1_HUMAN;tr|E9PRR7|E9PRR7_HUMAN	sp|Q14331|FRG1_HUMAN;tr|E9PRR7|E9PRR7_HUMAN	1	1	1860000	1	1	1	1	1	1860000	1;1	1;1	1;1	sp|Q14331|FRG1_HUMAN Protein FRG1 OS=Homo sapiens GN=FRG1 PE=1 SV=1;tr|E9PRR7|E9PRR7_HUMAN Protein FRG1 (Fragment) OS=Homo sapiens GN=FRG1 PE=1 SV=1	2	1	1	1	0	0	0	0	0	1	0	0	0	0	0	1	0	0	0	0	0	1	5	5	5	29.172	258	258;526	0.0056101	6.4157	0	0	0	0	0
sp|Q9Y6V7|DDX49_HUMAN;tr|M0R1S3|M0R1S3_HUMAN;tr|M0QZC0|M0QZC0_HUMAN;tr|Q5XG96|Q5XG96_HUMAN	sp|Q9Y6V7|DDX49_HUMAN;tr|M0R1S3|M0R1S3_HUMAN;tr|M0QZC0|M0QZC0_HUMAN;tr|Q5XG96|Q5XG96_HUMAN	1	4060800	1838100	1	1	1	1	4060800	1838100	2;1;1;1	2;1;1;1	2;1;1;1	sp|Q9Y6V7|DDX49_HUMAN Probable ATP-dependent RNA helicase DDX49 OS=Homo sapiens GN=DDX49 PE=1 SV=1;tr|M0R1S3|M0R1S3_HUMAN Probable ATP-dependent RNA helicase DDX49 OS=Homo sapiens GN=DDX49 PE=1 SV=1;tr|M0QZC0|M0QZC0_HUMAN Probable ATP-dependent RNA helicas	4	2	2	2	0	0	0	0	2	2	0	0	0	0	2	2	0	0	0	0	2	2	4.6	4.6	4.6	54.226	483	483;112;118;774	0	14.935	0	0	0	0	4.6
sp|O95625|ZBT11_HUMAN	sp|O95625|ZBT11_HUMAN	1	1	1835200	1	1	1	1	1	1835200	1	1	1	sp|O95625|ZBT11_HUMAN Zinc finger and BTB domain-containing protein 11 OS=Homo sapiens GN=ZBTB11 PE=1 SV=2	1	1	1	1	0	0	0	0	1	1	0	0	0	0	1	1	0	0	0	0	1	1	1.1	1.1	1.1	119.38	1053	1053	0.0015291	7.0706	0	0	0	0	1.1
sp|Q7Z2T5|TRM1L_HUMAN	sp|Q7Z2T5|TRM1L_HUMAN	1	1455000	1810300	1	1	1	1	1455000	1810300	2	2	2	sp|Q7Z2T5|TRM1L_HUMAN TRMT1-like protein OS=Homo sapiens GN=TRMT1L PE=1 SV=2	1	2	2	2	0	0	0	0	2	2	0	0	0	0	2	2	0	0	0	0	2	2	8.7	8.7	8.7	81.746	733	733	0	12.493	0	0	0	0	8.7
sp|Q9BUQ8|DDX23_HUMAN	sp|Q9BUQ8|DDX23_HUMAN	1	1	1780700	1	1	1	1	1	1780700	7	7	7	sp|Q9BUQ8|DDX23_HUMAN Probable ATP-dependent RNA helicase DDX23 OS=Homo sapiens GN=DDX23 PE=1 SV=3	1	7	7	7	2	0	0	1	2	3	2	0	0	1	2	3	2	0	0	1	2	3	9.6	9.6	9.6	95.581	820	820	0	41.027	2.2	0	0	1.5	3.9
sp|Q9H116|GZF1_HUMAN	sp|Q9H116|GZF1_HUMAN	1	1	1779200	1	1	1	1	1	1779200	1	1	1	sp|Q9H116|GZF1_HUMAN GDNF-inducible zinc finger protein 1 OS=Homo sapiens GN=GZF1 PE=1 SV=1	1	1	1	1	0	0	0	0	0	1	0	0	0	0	0	1	0	0	0	0	0	1	3.2	3.2	3.2	80.491	711	711	0.0015949	7.8703	0	0	0	0	0
sp|Q9NZM5|GSCR2_HUMAN	sp|Q9NZM5|GSCR2_HUMAN	1	1	1751600	1	1	1	1	1	1751600	2	2	2	sp|Q9NZM5|GSCR2_HUMAN Glioma tumor suppressor candidate region gene 2 protein OS=Homo sapiens GN=GLTSCR2 PE=1 SV=2	1	2	2	2	0	0	0	0	1	2	0	0	0	0	1	2	0	0	0	0	1	2	6.1	6.1	6.1	54.389	478	478	0	12.844	0	0	0	0	4.2
sp|P52298|NCBP2_HUMAN;tr|F8WE41|F8WE41_HUMAN	sp|P52298|NCBP2_HUMAN;tr|F8WE41|F8WE41_HUMAN	1	1	1690200	1	1	1	1	1	1690200	1;1	1;1	1;1	sp|P52298|NCBP2_HUMAN Nuclear cap-binding protein subunit 2 OS=Homo sapiens GN=NCBP2 PE=1 SV=1;tr|F8WE41|F8WE41_HUMAN Nuclear cap-binding protein subunit 2 OS=Homo sapiens GN=NCBP2 PE=1 SV=1	2	1	1	1	1	0	0	0	1	1	1	0	0	0	1	1	1	0	0	0	1	1	7.1	7.1	7.1	18.001	156	156;248	0.0082418	6.3319	7.1	0	0	0	7.1
sp|P26641|EF1G_HUMAN	sp|P26641|EF1G_HUMAN	1	1	1688400	1	1	1	1	1	1688400	2	2	2	sp|P26641|EF1G_HUMAN Elongation factor 1-gamma OS=Homo sapiens GN=EEF1G PE=1 SV=3	1	2	2	2	1	0	0	1	1	2	1	0	0	1	1	2	1	0	0	1	1	2	5.9	5.9	5.9	50.118	437	437	0	17.518	3	0	0	3	3
tr|D6RA57|D6RA57_HUMAN;sp|Q96EY4|TMA16_HUMAN;tr|H0Y9X1|H0Y9X1_HUMAN	tr|D6RA57|D6RA57_HUMAN;sp|Q96EY4|TMA16_HUMAN;tr|H0Y9X1|H0Y9X1_HUMAN	1	1	1684800	1	1	1	1	1	1684800	1;1;1	1;1;1	1;1;1	tr|D6RA57|D6RA57_HUMAN Translation machinery-associated protein 16 OS=Homo sapiens GN=TMA16 PE=1 SV=1;sp|Q96EY4|TMA16_HUMAN Translation machinery-associated protein 16 OS=Homo sapiens GN=TMA16 PE=1 SV=2;tr|H0Y9X1|H0Y9X1_HUMAN Translation machinery-associat	3	1	1	1	0	0	0	0	1	1	0	0	0	0	1	1	0	0	0	0	1	1	10.4	10.4	10.4	17.155	144	144;203;242	0.0015974	8.0021	0	0	0	0	10.4
sp|P17066|HSP76_HUMAN;sp|P48741|HSP77_HUMAN	sp|P17066|HSP76_HUMAN	1	1	1683800	1	1	1	1	1	1683800	9;4	1;1	1;1	sp|P17066|HSP76_HUMAN Heat shock 70 kDa protein 6 OS=Homo sapiens GN=HSPA6 PE=1 SV=2	2	9	1	1	8	5	3	7	5	4	1	1	0	1	1	1	1	1	0	1	1	1	13.8	1.7	1.7	71.027	643	643;367	0.0016207	8.6035	12.4	10.1	7	12.1	10.1
sp|Q9NQS7|INCE_HUMAN	sp|Q9NQS7|INCE_HUMAN	1	1	1640700	1	1	1	1	1	1640700	1	1	1	sp|Q9NQS7|INCE_HUMAN Inner centromere protein OS=Homo sapiens GN=INCENP PE=1 SV=3	1	1	1	1	0	0	0	0	0	1	0	0	0	0	0	1	0	0	0	0	0	1	1.9	1.9	1.9	105.43	918	918	0.0069541	6.3804	0	0	0	0	0
tr|K7EJM7|K7EJM7_HUMAN;tr|M0R2N4|M0R2N4_HUMAN;sp|Q8WU68|U2AF4_HUMAN;sp|Q01081|U2AF1_HUMAN;tr|K7EJH3|K7EJH3_HUMAN;tr|M0QYK5|M0QYK5_HUMAN	tr|K7EJM7|K7EJM7_HUMAN;tr|M0R2N4|M0R2N4_HUMAN;sp|Q8WU68|U2AF4_HUMAN;sp|Q01081|U2AF1_HUMAN;tr|K7EJH3|K7EJH3_HUMAN;tr|M0QYK5|M0QYK5_HUMAN	1	1	1619900	1	1	1	1	1	1619900	2;2;2;2;2;2	2;2;2;2;2;2	2;2;2;2;2;2	tr|K7EJM7|K7EJM7_HUMAN Splicing factor U2AF 26 kDa subunit OS=Homo sapiens GN=U2AF1L4 PE=4 SV=1;tr|M0R2N4|M0R2N4_HUMAN Uncharacterized protein OS=Homo sapiens PE=4 SV=1;sp|Q8WU68|U2AF4_HUMAN Splicing factor U2AF 26 kDa subunit OS=Homo sapiens GN=U2AF1L4 PE	6	2	2	2	1	0	0	1	2	1	1	0	0	1	2	1	1	0	0	1	2	1	27.5	27.5	27.5	5.4811	51	51;97;220;240;252;273	0	25.464	23.5	0	0	23.5	27.5
tr|J3KP30|J3KP30_HUMAN;sp|Q5QJE6|TDIF2_HUMAN	tr|J3KP30|J3KP30_HUMAN;sp|Q5QJE6|TDIF2_HUMAN	1	1	1617200	1	1	1	1	1	1617200	1;1	1;1	1;1	tr|J3KP30|J3KP30_HUMAN Deoxynucleotidyltransferase terminal-interacting protein 2 OS=Homo sapiens GN=DNTTIP2 PE=1 SV=1;sp|Q5QJE6|TDIF2_HUMAN Deoxynucleotidyltransferase terminal-interacting protein 2 OS=Homo sapiens GN=DNTTIP2 PE=1 SV=2	2	1	1	1	0	0	0	0	1	1	0	0	0	0	1	1	0	0	0	0	1	1	2.2	2.2	2.2	66.174	601	601;756	0.0015798	7.5932	0	0	0	0	2.2
tr|R4GNG4|R4GNG4_HUMAN;sp|Q5T280|CI114_HUMAN	tr|R4GNG4|R4GNG4_HUMAN;sp|Q5T280|CI114_HUMAN	1	1	1499500	1	1	1	1	1	1499500	1;1	1;1	1;1	tr|R4GNG4|R4GNG4_HUMAN Putative methyltransferase C9orf114 (Fragment) OS=Homo sapiens GN=C9orf114 PE=1 SV=1;sp|Q5T280|CI114_HUMAN Putative methyltransferase C9orf114 OS=Homo sapiens GN=C9orf114 PE=1 SV=3	2	1	1	1	0	0	0	0	0	1	0	0	0	0	0	1	0	0	0	0	0	1	14.9	14.9	14.9	9.2923	87	87;376	0.0015408	7.0917	0	0	0	0	0
tr|H3BPL4|H3BPL4_HUMAN;sp|Q1ED39|KNOP1_HUMAN	tr|H3BPL4|H3BPL4_HUMAN;sp|Q1ED39|KNOP1_HUMAN	1	1	1463200	1	1	1	1	1	1463200	1;1	1;1	1;1	tr|H3BPL4|H3BPL4_HUMAN Lysine-rich nucleolar protein 1 (Fragment) OS=Homo sapiens GN=KNOP1 PE=1 SV=2;sp|Q1ED39|KNOP1_HUMAN Lysine-rich nucleolar protein 1 OS=Homo sapiens GN=KNOP1 PE=1 SV=1	2	1	1	1	0	0	0	0	1	1	0	0	0	0	1	1	0	0	0	0	1	1	7	7	7	22.419	199	199;458	0.0014859	6.8454	0	0	0	0	7
tr|H7C318|H7C318_HUMAN;tr|H0Y4Q6|H0Y4Q6_HUMAN;sp|Q8WUA4|TF3C2_HUMAN	tr|H7C318|H7C318_HUMAN;tr|H0Y4Q6|H0Y4Q6_HUMAN;sp|Q8WUA4|TF3C2_HUMAN	1	1	1436800	1	1	1	1	1	1436800	1;1;1	1;1;1	1;1;1	tr|H7C318|H7C318_HUMAN General transcription factor 3C polypeptide 2 (Fragment) OS=Homo sapiens GN=GTF3C2 PE=1 SV=1;tr|H0Y4Q6|H0Y4Q6_HUMAN General transcription factor 3C polypeptide 2 (Fragment) OS=Homo sapiens GN=GTF3C2 PE=1 SV=1;sp|Q8WUA4|TF3C2_HUMAN Ge	3	1	1	1	0	0	0	0	0	1	0	0	0	0	0	1	0	0	0	0	0	1	19	19	19	15.702	142	142;420;911	0.0081855	6.2727	0	0	0	0	0
tr|E9PH18|E9PH18_HUMAN;sp|O75190|DNJB6_HUMAN	tr|E9PH18|E9PH18_HUMAN;sp|O75190|DNJB6_HUMAN	1	1	1423200	1	1	1	1	1	1423200	1;1	1;1	1;1	tr|E9PH18|E9PH18_HUMAN DnaJ homolog subfamily B member 6 OS=Homo sapiens GN=DNAJB6 PE=1 SV=1;sp|O75190|DNJB6_HUMAN DnaJ homolog subfamily B member 6 OS=Homo sapiens GN=DNAJB6 PE=1 SV=2	2	1	1	1	0	0	0	0	1	1	0	0	0	0	1	1	0	0	0	0	1	1	7.1	7.1	7.1	23.84	211	211;326	0.0015198	7.0369	0	0	0	0	7.1
tr|H7C1M2|H7C1M2_HUMAN	tr|H7C1M2|H7C1M2_HUMAN	1	1	1398900	1	1	1	1	1	1398900	4	2	2	tr|H7C1M2|H7C1M2_HUMAN Protein SON (Fragment) OS=Homo sapiens GN=SON PE=1 SV=1	1	4	2	2	1	0	0	2	1	2	0	0	0	0	1	1	0	0	0	0	1	1	4.3	2.3	2.3	159.91	1454	1454	0	11.667	1	0	0	2	1.2
tr|B4DP61|B4DP61_HUMAN;tr|E7EQZ4|E7EQZ4_HUMAN;sp|Q16637|SMN_HUMAN	tr|B4DP61|B4DP61_HUMAN;tr|E7EQZ4|E7EQZ4_HUMAN;sp|Q16637|SMN_HUMAN	1	1	1354300	1	1	1	1	1	1354300	1;1;1	1;1;1	1;1;1	tr|B4DP61|B4DP61_HUMAN Survival motor neuron protein OS=Homo sapiens GN=SMN1 PE=1 SV=1;tr|E7EQZ4|E7EQZ4_HUMAN Survival motor neuron protein OS=Homo sapiens GN=SMN1 PE=1 SV=1;sp|Q16637|SMN_HUMAN Survival motor neuron protein OS=Homo sapiens GN=SMN1 PE=1 SV=	3	1	1	1	0	0	0	0	1	1	0	0	0	0	1	1	0	0	0	0	1	1	7.9	7.9	7.9	24.38	227	227;294;294	0.0016313	9.1064	0	0	0	0	7.9
sp|O43823|AKAP8_HUMAN	sp|O43823|AKAP8_HUMAN	1	1	1349000	1	1	1	1	1	1349000	1	1	1	sp|O43823|AKAP8_HUMAN A-kinase anchor protein 8 OS=Homo sapiens GN=AKAP8 PE=1 SV=1	1	1	1	1	0	0	0	0	1	1	0	0	0	0	1	1	0	0	0	0	1	1	3.3	3.3	3.3	76.107	692	692	0.0016051	8.1612	0	0	0	0	3.3
sp|Q7Z4Q2|HEAT3_HUMAN	sp|Q7Z4Q2|HEAT3_HUMAN	1	1	1316100	1	1	1	1	1	1316100	1	1	1	sp|Q7Z4Q2|HEAT3_HUMAN HEAT repeat-containing protein 3 OS=Homo sapiens GN=HEATR3 PE=1 SV=2	1	1	1	1	0	0	0	0	0	1	0	0	0	0	0	1	0	0	0	0	0	1	1.9	1.9	1.9	74.582	680	680	0.009498	6.258	0	0	0	0	0
tr|E5RGA2|E5RGA2_HUMAN;sp|P60228|EIF3E_HUMAN;tr|H0YAW4|H0YAW4_HUMAN;tr|E5RHS5|E5RHS5_HUMAN	tr|E5RGA2|E5RGA2_HUMAN;sp|P60228|EIF3E_HUMAN;tr|H0YAW4|H0YAW4_HUMAN;tr|E5RHS5|E5RHS5_HUMAN	1	1	1301500	1	1	1	1	1	1301500	3;3;2;2	3;3;2;2	3;3;2;2	tr|E5RGA2|E5RGA2_HUMAN Eukaryotic translation initiation factor 3 subunit E OS=Homo sapiens GN=EIF3E PE=1 SV=1;sp|P60228|EIF3E_HUMAN Eukaryotic translation initiation factor 3 subunit E OS=Homo sapiens GN=EIF3E PE=1 SV=1;tr|H0YAW4|H0YAW4_HUMAN Eukaryotic t	4	3	3	3	1	0	0	0	1	1	1	0	0	0	1	1	1	0	0	0	1	1	14.2	14.2	14.2	41.357	352	352;445;156;524	0	17.079	2.8	0	0	0	5.7
tr|H0YIL2|H0YIL2_HUMAN;sp|Q9Y4C8|RBM19_HUMAN	tr|H0YIL2|H0YIL2_HUMAN;sp|Q9Y4C8|RBM19_HUMAN	1	1	1262500	1	1	1	1	1	1262500	1;1	1;1	1;1	tr|H0YIL2|H0YIL2_HUMAN Probable RNA-binding protein 19 (Fragment) OS=Homo sapiens GN=RBM19 PE=1 SV=1;sp|Q9Y4C8|RBM19_HUMAN Probable RNA-binding protein 19 OS=Homo sapiens GN=RBM19 PE=1 SV=3	2	1	1	1	0	0	0	0	1	1	0	0	0	0	1	1	0	0	0	0	1	1	9.1	9.1	9.1	12.468	110	110;960	0.0056577	6.4575	0	0	0	0	9.1
sp|Q15427|SF3B4_HUMAN	sp|Q15427|SF3B4_HUMAN	1	1	1255800	1	1	1	1	1	1255800	1	1	1	sp|Q15427|SF3B4_HUMAN Splicing factor 3B subunit 4 OS=Homo sapiens GN=SF3B4 PE=1 SV=1	1	1	1	1	1	0	0	1	1	1	1	0	0	1	1	1	1	0	0	1	1	1	3.3	3.3	3.3	44.385	424	424	0.0015748	7.5453	3.3	0	0	3.3	3.3
sp|Q7Z417|NUFP2_HUMAN	sp|Q7Z417|NUFP2_HUMAN	1	1	1253300	1	1	1	1	1	1253300	1	1	1	sp|Q7Z417|NUFP2_HUMAN Nuclear fragile X mental retardation-interacting protein 2 OS=Homo sapiens GN=NUFIP2 PE=1 SV=1	1	1	1	1	0	0	0	0	1	1	0	0	0	0	1	1	0	0	0	0	1	1	3.2	3.2	3.2	76.12	695	695	0.0058055	6.611	0	0	0	0	3.2
sp|P61326|MGN_HUMAN;tr|F5H6P7|F5H6P7_HUMAN;tr|F5H3U9|F5H3U9_HUMAN	sp|P61326|MGN_HUMAN;tr|F5H6P7|F5H6P7_HUMAN	1	1	1154700	1	1	1	1	1	1154700	6;5;2	1;0;0	1;0;0	sp|P61326|MGN_HUMAN Protein mago nashi homolog OS=Homo sapiens GN=MAGOH PE=1 SV=1;tr|F5H6P7|F5H6P7_HUMAN Protein mago nashi homolog 2 OS=Homo sapiens GN=MAGOHB PE=4 SV=1	3	6	1	1	4	1	3	4	5	5	0	0	0	0	0	1	0	0	0	0	0	1	43.2	5.5	5.5	17.163	146	146;102;44	1	-2	24	11.6	18.5	24	37.7
tr|A0A087WWJ9|A0A087WWJ9_HUMAN;sp|P14735|IDE_HUMAN	tr|A0A087WWJ9|A0A087WWJ9_HUMAN;sp|P14735|IDE_HUMAN	1	1	1146800	1	1	1	1	1	1146800	1;1	1;1	1;1	tr|A0A087WWJ9|A0A087WWJ9_HUMAN BRCA1-A complex subunit Abraxas (Fragment) OS=Homo sapiens GN=FAM175A PE=1 SV=1;sp|P14735|IDE_HUMAN Insulin-degrading enzyme OS=Homo sapiens GN=IDE PE=1 SV=4	2	1	1	1	1	1	0	1	1	1	1	1	0	1	1	1	1	1	0	1	1	1	1.5	1.5	1.5	72.307	664	664;2486	0.002963	6.7984	1.5	1.5	0	1.5	1.5
tr|Q09GN1|Q09GN1_HUMAN;sp|Q71F23|CENPU_HUMAN	tr|Q09GN1|Q09GN1_HUMAN;sp|Q71F23|CENPU_HUMAN	1	1	1098900	1	1	1	1	1	1098900	1;1	1;1	1;1	tr|Q09GN1|Q09GN1_HUMAN Centromere protein U OS=Homo sapiens GN=MLF1IP PE=1 SV=1;sp|Q71F23|CENPU_HUMAN Centromere protein U OS=Homo sapiens GN=CENPU PE=1 SV=1	2	1	1	1	0	0	0	0	1	1	0	0	0	0	1	1	0	0	0	0	1	1	3.4	3.4	3.4	35.89	320	320;418	0.0069061	6.3587	0	0	0	0	3.4
sp|Q96SB8|SMC6_HUMAN	sp|Q96SB8|SMC6_HUMAN	1	1	1096200	1	1	1	1	1	1096200	1	1	1	sp|Q96SB8|SMC6_HUMAN Structural maintenance of chromosomes protein 6 OS=Homo sapiens GN=SMC6 PE=1 SV=2	1	1	1	1	0	0	0	0	0	1	0	0	0	0	0	1	0	0	0	0	0	1	0.9	0.9	0.9	126.32	1091	1091	0.0057471	6.5526	0	0	0	0	0
sp|Q8N5C6|SRBD1_HUMAN	sp|Q8N5C6|SRBD1_HUMAN	1	1	1079600	1	1	1	1	1	1079600	1	1	1	sp|Q8N5C6|SRBD1_HUMAN S1 RNA-binding domain-containing protein 1 OS=Homo sapiens GN=SRBD1 PE=1 SV=2	1	1	1	1	0	0	0	0	0	1	0	0	0	0	0	1	0	0	0	0	0	1	1.3	1.3	1.3	111.77	995	995	0.0015699	7.4218	0	0	0	0	0
tr|A0A0C4DGD2|A0A0C4DGD2_HUMAN;tr|E5RGM7|E5RGM7_HUMAN;tr|E5RK41|E5RK41_HUMAN;sp|O95391|SLU7_HUMAN	tr|A0A0C4DGD2|A0A0C4DGD2_HUMAN;tr|E5RGM7|E5RGM7_HUMAN;tr|E5RK41|E5RK41_HUMAN;sp|O95391|SLU7_HUMAN	1	1	1070700	1	1	1	1	1	1070700	1;1;1;1	1;1;1;1	1;1;1;1	tr|A0A0C4DGD2|A0A0C4DGD2_HUMAN Pre-mRNA-splicing factor SLU7 (Fragment) OS=Homo sapiens GN=SLU7 PE=1 SV=1;tr|E5RGM7|E5RGM7_HUMAN Pre-mRNA-splicing factor SLU7 (Fragment) OS=Homo sapiens GN=SLU7 PE=1 SV=1;tr|E5RK41|E5RK41_HUMAN Pre-mRNA-splicing factor SLU7	4	1	1	1	0	0	0	0	0	1	0	0	0	0	0	1	0	0	0	0	0	1	16.8	16.8	16.8	11.587	101	101;124;143;586	0.0016234	8.6385	0	0	0	0	0
sp|O14646|CHD1_HUMAN;sp|O14647|CHD2_HUMAN	sp|O14646|CHD1_HUMAN;sp|O14647|CHD2_HUMAN	1	1	1068100	1	1	1	1	1	1068100	1;1	1;1	1;1	sp|O14646|CHD1_HUMAN Chromodomain-helicase-DNA-binding protein 1 OS=Homo sapiens GN=CHD1 PE=1 SV=2;sp|O14647|CHD2_HUMAN Chromodomain-helicase-DNA-binding protein 2 OS=Homo sapiens GN=CHD2 PE=1 SV=2	2	1	1	1	0	0	0	0	0	1	0	0	0	0	0	1	0	0	0	0	0	1	0.8	0.8	0.8	196.69	1710	1710;1828	0.005618	6.4157	0	0	0	0	0
tr|H7C0C0|H7C0C0_HUMAN;sp|Q9Y5Q9|TF3C3_HUMAN	tr|H7C0C0|H7C0C0_HUMAN;sp|Q9Y5Q9|TF3C3_HUMAN	1	1	1063700	1	1	1	1	1	1063700	1;1	1;1	1;1	tr|H7C0C0|H7C0C0_HUMAN General transcription factor 3C polypeptide 3 (Fragment) OS=Homo sapiens GN=GTF3C3 PE=1 SV=1;sp|Q9Y5Q9|TF3C3_HUMAN General transcription factor 3C polypeptide 3 OS=Homo sapiens GN=GTF3C3 PE=1 SV=1	2	1	1	1	0	0	0	0	1	1	0	0	0	0	1	1	0	0	0	0	1	1	8.1	8.1	8.1	16.562	148	148;886	0.009396	6.1444	0	0	0	0	8.1
tr|F5H3K2|F5H3K2_HUMAN;tr|F5H8B7|F5H8B7_HUMAN;tr|E7ENF1|E7ENF1_HUMAN;sp|Q96C57|CL043_HUMAN;tr|F5H4Y8|F5H4Y8_HUMAN;tr|A0A0G2JMC9|A0A0G2JMC9_HUMAN	tr|F5H3K2|F5H3K2_HUMAN;tr|F5H8B7|F5H8B7_HUMAN;tr|E7ENF1|E7ENF1_HUMAN;sp|Q96C57|CL043_HUMAN;tr|F5H4Y8|F5H4Y8_HUMAN;tr|A0A0G2JMC9|A0A0G2JMC9_HUMAN	1	1	1041400	1	1	1	1	1	1041400	1;1;1;1;1;1	1;1;1;1;1;1	1;1;1;1;1;1	tr|F5H3K2|F5H3K2_HUMAN Uncharacterized protein C12orf43 (Fragment) OS=Homo sapiens GN=C12orf43 PE=1 SV=1;tr|F5H8B7|F5H8B7_HUMAN Uncharacterized protein C12orf43 (Fragment) OS=Homo sapiens GN=C12orf43 PE=1 SV=2;tr|E7ENF1|E7ENF1_HUMAN Uncharacterized protein	6	1	1	1	0	0	0	0	0	1	0	0	0	0	0	1	0	0	0	0	0	1	12.2	12.2	12.2	20.499	188	188;195;221;262;411;884	0.0015898	7.8049	0	0	0	0	0
tr|A0A096LPH6|A0A096LPH6_HUMAN;sp|Q14966|ZN638_HUMAN	tr|A0A096LPH6|A0A096LPH6_HUMAN;sp|Q14966|ZN638_HUMAN	1	1	1038000	1	1	1	1	1	1038000	1;1	1;1	1;1	tr|A0A096LPH6|A0A096LPH6_HUMAN Zinc finger protein 638 OS=Homo sapiens GN=ZNF638 PE=1 SV=1;sp|Q14966|ZN638_HUMAN Zinc finger protein 638 OS=Homo sapiens GN=ZNF638 PE=1 SV=2	2	1	1	1	0	0	0	0	1	1	0	0	0	0	1	1	0	0	0	0	1	1	1.9	1.9	1.9	104.05	918	918;1978	0.0057389	6.5518	0	0	0	0	1.9
tr|D6RC18|D6RC18_HUMAN;tr|A8MVI5|A8MVI5_HUMAN;sp|Q9ULR0|ISY1_HUMAN	tr|D6RC18|D6RC18_HUMAN;tr|A8MVI5|A8MVI5_HUMAN;sp|Q9ULR0|ISY1_HUMAN	1	1	993670	1	1	1	1	1	993670	1;1;1	1;1;1	1;1;1	tr|D6RC18|D6RC18_HUMAN Pre-mRNA-splicing factor ISY1 homolog OS=Homo sapiens GN=ISY1 PE=1 SV=1;tr|A8MVI5|A8MVI5_HUMAN Pre-mRNA-splicing factor ISY1 homolog OS=Homo sapiens GN=ISY1 PE=1 SV=1;sp|Q9ULR0|ISY1_HUMAN Pre-mRNA-splicing factor ISY1 homolog OS=Homo	3	1	1	1	0	0	0	0	1	1	0	0	0	0	1	1	0	0	0	0	1	1	10.5	10.5	10.5	14.311	124	124;252;285	0.004386	6.6542	0	0	0	0	10.5
sp|Q08J23|NSUN2_HUMAN	sp|Q08J23|NSUN2_HUMAN	1	1	991040	1	1	1	1	1	991040	1	1	1	sp|Q08J23|NSUN2_HUMAN tRNA (cytosine(34)-C(5))-methyltransferase OS=Homo sapiens GN=NSUN2 PE=1 SV=2	1	1	1	1	0	0	0	0	1	1	0	0	0	0	1	1	0	0	0	0	1	1	1.4	1.4	1.4	86.47	767	767	0.0056657	6.4588	0	0	0	0	1.4
tr|H7C1P0|H7C1P0_HUMAN;sp|P35249|RFC4_HUMAN	tr|H7C1P0|H7C1P0_HUMAN;sp|P35249|RFC4_HUMAN	1	1	965770	1	1	1	1	1	965770	1;1	1;1	1;1	tr|H7C1P0|H7C1P0_HUMAN Replication factor C subunit 4 (Fragment) OS=Homo sapiens GN=RFC4 PE=1 SV=1;sp|P35249|RFC4_HUMAN Replication factor C subunit 4 OS=Homo sapiens GN=RFC4 PE=1 SV=2	2	1	1	1	0	0	0	0	1	1	0	0	0	0	1	1	0	0	0	0	1	1	11.7	11.7	11.7	11.849	111	111;363	0.0095238	6.2643	0	0	0	0	11.7
sp|P12270|TPR_HUMAN	sp|P12270|TPR_HUMAN	1	1	949750	1	1	1	1	1	949750	1	1	1	sp|P12270|TPR_HUMAN Nucleoprotein TPR OS=Homo sapiens GN=TPR PE=1 SV=3	1	1	1	1	1	1	0	0	1	1	1	1	0	0	1	1	1	1	0	0	1	1	0.4	0.4	0.4	267.29	2363	2363	0.001548	7.2162	0.4	0.4	0	0	0.4
tr|C9JMM0|C9JMM0_HUMAN;tr|S4R2Y4|S4R2Y4_HUMAN;sp|Q13185|CBX3_HUMAN;tr|G3V481|G3V481_HUMAN	tr|C9JMM0|C9JMM0_HUMAN;tr|S4R2Y4|S4R2Y4_HUMAN;sp|Q13185|CBX3_HUMAN;tr|G3V481|G3V481_HUMAN	1	1	929660	1	1	1	1	1	929660	1;1;1;1	1;1;1;1	1;1;1;1	tr|C9JMM0|C9JMM0_HUMAN Chromobox protein homolog 3 (Fragment) OS=Homo sapiens GN=CBX3 PE=1 SV=1;tr|S4R2Y4|S4R2Y4_HUMAN Chromobox protein homolog 3 (Fragment) OS=Homo sapiens GN=CBX3 PE=1 SV=1;sp|Q13185|CBX3_HUMAN Chromobox protein homolog 3 OS=Homo sapiens	4	1	1	1	1	0	0	1	1	1	1	0	0	1	1	1	1	0	0	1	1	1	22.6	22.6	22.6	7.2211	62	62;107;183;1006	0.0015221	7.0419	22.6	0	0	22.6	22.6
tr|B1AQ74|B1AQ74_HUMAN;sp|Q6NSI4|CX057_HUMAN	tr|B1AQ74|B1AQ74_HUMAN;sp|Q6NSI4|CX057_HUMAN	1	1	892400	1	1	1	1	1	892400	1;1	1;1	1;1	tr|B1AQ74|B1AQ74_HUMAN Uncharacterized protein CXorf57 (Fragment) OS=Homo sapiens GN=CXorf57 PE=1 SV=1;sp|Q6NSI4|CX057_HUMAN Uncharacterized protein CXorf57 OS=Homo sapiens GN=CXorf57 PE=1 SV=2	2	1	1	1	0	0	0	0	1	1	0	0	0	0	1	1	0	0	0	0	1	1	3.9	3.9	3.9	65.136	566	566;855	0.0094851	6.2374	0	0	0	0	3.9
tr|M0QZM1|M0QZM1_HUMAN	tr|M0QZM1|M0QZM1_HUMAN	1	1	878520	1	1	1	1	1	878520	21	1	1	tr|M0QZM1|M0QZM1_HUMAN Heterogeneous nuclear ribonucleoprotein M (Fragment) OS=Homo sapiens GN=HNRNPM PE=1 SV=1	1	21	1	1	1	0	0	7	19	17	0	0	0	0	0	1	0	0	0	0	0	1	58.2	3.7	3.7	39.933	383	383	1	-2	3.9	0	0	21.9	51.7
tr|H0YJH9|H0YJH9_HUMAN;tr|G3V4T2|G3V4T2_HUMAN;sp|Q86U42|PABP2_HUMAN;tr|B4DEH8|B4DEH8_HUMAN	tr|H0YJH9|H0YJH9_HUMAN;tr|G3V4T2|G3V4T2_HUMAN;sp|Q86U42|PABP2_HUMAN;tr|B4DEH8|B4DEH8_HUMAN	1	1	859880	1	1	1	1	1	859880	1;1;1;1	1;1;1;1	1;1;1;1	tr|H0YJH9|H0YJH9_HUMAN Polyadenylate-binding protein 2 (Fragment) OS=Homo sapiens GN=PABPN1 PE=1 SV=1;tr|G3V4T2|G3V4T2_HUMAN Polyadenylate-binding protein 2 OS=Homo sapiens GN=PABPN1 PE=1 SV=1;sp|Q86U42|PABP2_HUMAN Polyadenylate-binding protein 2 OS=Homo s	4	1	1	1	0	0	0	0	0	1	0	0	0	0	0	1	0	0	0	0	0	1	11.5	11.5	11.5	10.971	96	96;178;306;359	0.0069735	6.3883	0	0	0	0	0
sp|Q9UII4|HERC5_HUMAN	sp|Q9UII4|HERC5_HUMAN	1	1	843970	1	1	1	1	1	843970	1	1	1	sp|Q9UII4|HERC5_HUMAN E3 ISG15--protein ligase HERC5 OS=Homo sapiens GN=HERC5 PE=1 SV=2	1	1	1	1	0	0	0	0	0	1	0	0	0	0	0	1	0	0	0	0	0	1	1.8	1.8	1.8	116.85	1024	1024	0.0082192	6.3108	0	0	0	0	0
tr|H0YLA0|H0YLA0_HUMAN;tr|H0YM42|H0YM42_HUMAN;sp|O43663|PRC1_HUMAN	tr|H0YLA0|H0YLA0_HUMAN;tr|H0YM42|H0YM42_HUMAN;sp|O43663|PRC1_HUMAN	1	1	815000	1	1	1	1	1	815000	1;1;1	1;1;1	1;1;1	tr|H0YLA0|H0YLA0_HUMAN Protein regulator of cytokinesis 1 (Fragment) OS=Homo sapiens GN=PRC1 PE=1 SV=1;tr|H0YM42|H0YM42_HUMAN Protein regulator of cytokinesis 1 (Fragment) OS=Homo sapiens GN=PRC1 PE=1 SV=1;sp|O43663|PRC1_HUMAN Protein regulator of cytokine	3	1	1	1	0	0	0	0	0	1	0	0	0	0	0	1	0	0	0	0	0	1	11.8	11.8	11.8	12.96	110	110;154;620	0.0015625	7.3884	0	0	0	0	0
tr|Q5TBP9|Q5TBP9_HUMAN;sp|Q9BX40|LS14B_HUMAN	tr|Q5TBP9|Q5TBP9_HUMAN;sp|Q9BX40|LS14B_HUMAN	1	1	800970	1	1	1	1	1	800970	1;1	1;1	1;1	tr|Q5TBP9|Q5TBP9_HUMAN Protein LSM14 homolog B (Fragment) OS=Homo sapiens GN=LSM14B PE=1 SV=1;sp|Q9BX40|LS14B_HUMAN Protein LSM14 homolog B OS=Homo sapiens GN=LSM14B PE=1 SV=1	2	1	1	1	0	0	0	0	1	1	0	0	0	0	1	1	0	0	0	0	1	1	4.4	4.4	4.4	26.715	248	248;385	0.005814	6.6251	0	0	0	0	4.4
tr|Q9BYK2|Q9BYK2_HUMAN;sp|P63220|RS21_HUMAN;tr|Q9BYK1|Q9BYK1_HUMAN;tr|Q8WVC2|Q8WVC2_HUMAN	tr|Q9BYK2|Q9BYK2_HUMAN;sp|P63220|RS21_HUMAN;tr|Q9BYK1|Q9BYK1_HUMAN;tr|Q8WVC2|Q8WVC2_HUMAN	1	1	786250	1	1	1	1	1	786250	1;1;1;1	1;1;1;1	1;1;1;1	tr|Q9BYK2|Q9BYK2_HUMAN 40S ribosomal protein S21 OS=Homo sapiens GN=RPS21 PE=1 SV=1;sp|P63220|RS21_HUMAN 40S ribosomal protein S21 OS=Homo sapiens GN=RPS21 PE=1 SV=1;tr|Q9BYK1|Q9BYK1_HUMAN 40S ribosomal protein S21 OS=Homo sapiens GN=RPS21 PE=1 SV=1;tr|Q8W	4	1	1	1	0	0	0	0	1	1	0	0	0	0	1	1	0	0	0	0	1	1	22.7	22.7	22.7	7.091	66	66;83;90;2062	0.0016155	8.483	0	0	0	0	22.7
tr|F6SQZ1|F6SQZ1_HUMAN;tr|F6XM96|F6XM96_HUMAN;sp|Q9UBB9|TFP11_HUMAN	tr|F6SQZ1|F6SQZ1_HUMAN;tr|F6XM96|F6XM96_HUMAN;sp|Q9UBB9|TFP11_HUMAN	1	1	778340	1	1	1	1	1	778340	1;1;1	1;1;1	1;1;1	tr|F6SQZ1|F6SQZ1_HUMAN Tuftelin-interacting protein 11 (Fragment) OS=Homo sapiens GN=TFIP11 PE=1 SV=1;tr|F6XM96|F6XM96_HUMAN Tuftelin-interacting protein 11 (Fragment) OS=Homo sapiens GN=TFIP11 PE=1 SV=1;sp|Q9UBB9|TFP11_HUMAN Tuftelin-interacting protein 1	3	1	1	1	0	0	0	0	1	1	0	0	0	0	1	1	0	0	0	0	1	1	17	17	17	10.339	88	88;121;837	0.0094467	6.2047	0	0	0	0	17
sp|Q9Y5L4|TIM13_HUMAN	sp|Q9Y5L4|TIM13_HUMAN	1	1	762810	1	1	1	1	1	762810	1	1	1	sp|Q9Y5L4|TIM13_HUMAN Mitochondrial import inner membrane translocase subunit Tim13 OS=Homo sapiens GN=TIMM13 PE=1 SV=1	1	1	1	1	0	0	0	0	0	1	0	0	0	0	0	1	0	0	0	0	0	1	14.7	14.7	14.7	10.5	95	95	0.0015432	7.1635	0	0	0	0	0
tr|H3BQM0|H3BQM0_HUMAN	tr|H3BQM0|H3BQM0_HUMAN	1	1	762580	1	1	1	1	1	762580	1	1	1	tr|H3BQM0|H3BQM0_HUMAN Non-canonical poly(A) RNA polymerase PAPD5 OS=Homo sapiens GN=PAPD5 PE=1 SV=1	1	1	1	1	0	0	0	0	0	1	0	0	0	0	0	1	0	0	0	0	0	1	2.9	2.9	2.9	64.693	588	588	0.0055944	6.4104	0	0	0	0	0
sp|P62140|PP1B_HUMAN;tr|C9J9S3|C9J9S3_HUMAN;tr|C9JP48|C9JP48_HUMAN	sp|P62140|PP1B_HUMAN;tr|C9J9S3|C9J9S3_HUMAN;tr|C9JP48|C9JP48_HUMAN	1	1	762000	1	1	1	1	1	762000	3;2;2	1;1;1	1;1;1	sp|P62140|PP1B_HUMAN Serine/threonine-protein phosphatase PP1-beta catalytic subunit OS=Homo sapiens GN=PPP1CB PE=1 SV=3;tr|C9J9S3|C9J9S3_HUMAN Serine/threonine-protein phosphatase (Fragment) OS=Homo sapiens GN=PPP1CB PE=1 SV=1;tr|C9JP48|C9JP48_HUMAN Serin	3	3	1	1	1	1	0	1	3	2	0	0	0	0	1	1	0	0	0	0	1	1	11.6	4	4	37.186	327	327;125;138	0.0015924	7.8053	4.3	4.3	0	4.3	11.6
tr|B1AHC9|B1AHC9_HUMAN;sp|P12956|XRCC6_HUMAN	tr|B1AHC9|B1AHC9_HUMAN;sp|P12956|XRCC6_HUMAN	1	1	730790	1	1	1	1	1	730790	1;1	1;1	1;1	tr|B1AHC9|B1AHC9_HUMAN X-ray repair cross-complementing protein 6 OS=Homo sapiens GN=XRCC6 PE=1 SV=1;sp|P12956|XRCC6_HUMAN X-ray repair cross-complementing protein 6 OS=Homo sapiens GN=XRCC6 PE=1 SV=2	2	1	1	1	0	0	0	0	0	1	0	0	0	0	0	1	0	0	0	0	0	1	2.5	2.5	2.5	64.283	559	559;609	0.0015649	7.3919	0	0	0	0	0
sp|O00257|CBX4_HUMAN	sp|O00257|CBX4_HUMAN	1	1	725220	1	1	1	1	1	725220	2	2	2	sp|O00257|CBX4_HUMAN E3 SUMO-protein ligase CBX4 OS=Homo sapiens GN=CBX4 PE=1 SV=3	1	2	2	2	0	0	0	0	1	1	0	0	0	0	1	1	0	0	0	0	1	1	5.2	5.2	5.2	61.367	560	560	0	11.616	0	0	0	0	3.2
tr|F8WEG8|F8WEG8_HUMAN;tr|G5E9Q4|G5E9Q4_HUMAN;tr|C9JMM3|C9JMM3_HUMAN;sp|O75569|PRKRA_HUMAN	tr|F8WEG8|F8WEG8_HUMAN;tr|G5E9Q4|G5E9Q4_HUMAN;tr|C9JMM3|C9JMM3_HUMAN;sp|O75569|PRKRA_HUMAN	1	1	711990	1	1	1	1	1	711990	2;2;2;2	2;2;2;2	2;2;2;2	tr|F8WEG8|F8WEG8_HUMAN Interferon-inducible double-stranded RNA-dependent protein kinase activator A OS=Homo sapiens GN=PRKRA PE=1 SV=1;tr|G5E9Q4|G5E9Q4_HUMAN Interferon-inducible double-stranded RNA-dependent protein kinase activator A OS=Homo sapiens GN=	4	2	2	2	0	0	0	0	1	1	0	0	0	0	1	1	0	0	0	0	1	1	24.2	24.2	24.2	10.414	95	95;105;109;313	0	11.827	0	0	0	0	13.7
sp|Q6PD62|CTR9_HUMAN	sp|Q6PD62|CTR9_HUMAN	1	1	560530	1	1	1	1	1	560530	1	1	1	sp|Q6PD62|CTR9_HUMAN RNA polymerase-associated protein CTR9 homolog OS=Homo sapiens GN=CTR9 PE=1 SV=1	1	1	1	1	1	0	0	0	0	1	1	0	0	0	0	1	1	0	0	0	0	1	1.3	1.3	1.3	133.5	1173	1173	0.0057803	6.5693	1.3	0	0	0	0
sp|P05387|RLA2_HUMAN;tr|H0YDD8|H0YDD8_HUMAN	sp|P05387|RLA2_HUMAN;tr|H0YDD8|H0YDD8_HUMAN	21.4829	91.1593	146.367	14458000	66409000	27852000	310600000	6053800000	4076600000	12;6	12;6	10;4	sp|P05387|RLA2_HUMAN 60S acidic ribosomal protein P2 OS=Homo sapiens GN=RPLP2 PE=1 SV=1;tr|H0YDD8|H0YDD8_HUMAN 60S acidic ribosomal protein P2 (Fragment) OS=Homo sapiens GN=RPLP2 PE=1 SV=1	2	12	12	10	4	3	3	9	11	9	4	3	3	9	11	9	4	3	3	8	9	8	95.7	95.7	80.9	11.665	115	115;92	0	135.16	69.6	53	53	94.8	95.7
sp|P30050|RL12_HUMAN	sp|P30050|RL12_HUMAN	3.21043	1337500000	126.258	11177000	1	9121800	35883000	1337500000	1151700000	8	8	8	sp|P30050|RL12_HUMAN 60S ribosomal protein L12 OS=Homo sapiens GN=RPL12 PE=1 SV=1	1	8	8	8	2	1	2	3	8	7	2	1	2	3	8	7	2	1	2	3	8	7	48.5	48.5	48.5	17.818	165	165	0	64.296	15.2	9.7	15.2	23	48.5
sp|Q99878|H2A1J_HUMAN;sp|Q96KK5|H2A1H_HUMAN;sp|Q9BTM1|H2AJ_HUMAN;sp|Q16777|H2A2C_HUMAN;sp|Q6FI13|H2A2A_HUMAN;sp|P20671|H2A1D_HUMAN;sp|P0C0S8|H2A1_HUMAN;tr|H0YFX9|H0YFX9_HUMAN;sp|Q93077|H2A1C_HUMAN;sp|Q7L7L0|H2A3_HUMAN;sp|P04908|H2A1B_HUMAN	sp|Q99878|H2A1J_HUMAN;sp|Q96KK5|H2A1H_HUMAN;sp|Q9BTM1|H2AJ_HUMAN;sp|Q16777|H2A2C_HUMAN;sp|Q6FI13|H2A2A_HUMAN;sp|P20671|H2A1D_HUMAN;sp|P0C0S8|H2A1_HUMAN;tr|H0YFX9|H0YFX9_HUMAN;sp|Q93077|H2A1C_HUMAN;sp|Q7L7L0|H2A3_HUMAN;sp|P04908|H2A1B_HUMAN	3.61413	43.026	56.0068	26250000	22730000	16448000	94871000	977980000	921200000	5;5;5;5;5;5;5;4;4;4;4	5;5;5;5;5;5;5;4;4;4;4	2;2;2;2;2;2;2;2;1;1;1	sp|Q99878|H2A1J_HUMAN Histone H2A type 1-J OS=Homo sapiens GN=HIST1H2AJ PE=1 SV=3;sp|Q96KK5|H2A1H_HUMAN Histone H2A type 1-H OS=Homo sapiens GN=HIST1H2AH PE=1 SV=3;sp|Q9BTM1|H2AJ_HUMAN Histone H2A.J OS=Homo sapiens GN=H2AFJ PE=1 SV=1;sp|Q16777|H2A2C_HUMAN	11	5	5	2	2	2	2	3	4	4	2	2	2	3	4	4	1	1	1	2	2	2	35.9	35.9	23.4	13.936	128	128;128;129;129;130;130;130;92;130;130;130	0	123.74	21.9	21.9	21.9	30.5	35.9
tr|A0A087X0X3|A0A087X0X3_HUMAN;sp|P52272|HNRPM_HUMAN;tr|M0R019|M0R019_HUMAN;tr|M0R2T0|M0R2T0_HUMAN;tr|M0R2I7|M0R2I7_HUMAN;tr|M0R0N3|M0R0N3_HUMAN;tr|M0QYQ7|M0QYQ7_HUMAN;tr|M0R0Y6|M0R0Y6_HUMAN;tr|M0QY96|M0QY96_HUMAN;tr|M0QYL3|M0QYL3_HUMAN	tr|A0A087X0X3|A0A087X0X3_HUMAN;sp|P52272|HNRPM_HUMAN	6.32319	31.2819	29.3798	16294000	33716000	29812000	103030000	1054700000	875870000	36;36;16;15;11;11;11;7;5;3	36;36;16;15;11;11;11;7;5;3	16;16;12;10;3;8;8;7;3;0	tr|A0A087X0X3|A0A087X0X3_HUMAN Heterogeneous nuclear ribonucleoprotein M OS=Homo sapiens GN=HNRNPM PE=1 SV=1;sp|P52272|HNRPM_HUMAN Heterogeneous nuclear ribonucleoprotein M OS=Homo sapiens GN=HNRNPM PE=1 SV=3	10	36	36	16	5	4	4	16	32	31	5	4	4	16	32	31	4	4	4	9	13	15	53.4	53.4	24.8	77.569	730	730;730;353;357;214;276;458;99;116;99	0	323.31	10.5	8.6	8.2	28.4	49.5
sp|P11940|PABP1_HUMAN;tr|E7ERJ7|E7ERJ7_HUMAN;tr|E7EQV3|E7EQV3_HUMAN;tr|A0A087WTT1|A0A087WTT1_HUMAN;tr|H0YAR2|H0YAR2_HUMAN;sp|Q9H361|PABP3_HUMAN;tr|H0YBN4|H0YBN4_HUMAN;tr|H0YAP2|H0YAP2_HUMAN;tr|H0YB86|H0YB86_HUMAN;sp|Q4VXU2|PAP1L_HUMAN;tr|E5RH24|E5RH24_HUMAN;tr|H0YB75|H0YB75_HUMAN;tr|H0YAS6|H0YAS6_HUMAN;tr|E5RJB9|E5RJB9_HUMAN;tr|E5RGH3|E5RGH3_HUMAN;tr|H0YAS7|H0YAS7_HUMAN;tr|H0YEQ8|H0YEQ8_HUMAN;tr|…	sp|P11940|PABP1_HUMAN;tr|E7ERJ7|E7ERJ7_HUMAN;tr|E7EQV3|E7EQV3_HUMAN;tr|A0A087WTT1|A0A087WTT1_HUMAN;tr|H0YAR2|H0YAR2_HUMAN	2.69068	12.3917	15.9823	45219000	50595000	34998000	121670000	626960000	559350000	25;24;24;23;15;11;9;6;6;5;5;5;5;5;5;3;3;3;2;1;1;1;1;1	25;24;24;23;15;11;9;6;6;5;5;5;5;5;5;3;3;3;2;1;1;1;1;1	17;16;16;15;10;9;3;6;4;3;2;5;5;2;2;3;0;1;2;1;1;1;1;1	sp|P11940|PABP1_HUMAN Polyadenylate-binding protein 1 OS=Homo sapiens GN=PABPC1 PE=1 SV=2;tr|E7ERJ7|E7ERJ7_HUMAN Polyadenylate-binding protein OS=Homo sapiens GN=PABPC1 PE=1 SV=1;tr|E7EQV3|E7EQV3_HUMAN Polyadenylate-binding protein OS=Homo sapiens GN=PABPC	24	25	25	17	11	9	6	15	16	20	11	9	6	15	16	20	9	7	4	12	12	13	43.4	43.4	33.3	70.67	636	636;604;591;522;284;631;175;131;165;614;260;183;169;129;108;136;112;75;42;43;187;200;382;61	0	214.37	19.2	16.7	10.1	24.7	34.9
sp|P62805|H4_HUMAN	sp|P62805|H4_HUMAN	3.19829	15.2847	15.0956	75065000	64763000	61887000	240080000	989880000	934220000	8	8	8	sp|P62805|H4_HUMAN Histone H4 OS=Homo sapiens GN=HIST1H4A PE=1 SV=2	1	8	8	8	6	5	5	7	8	8	6	5	5	7	8	8	6	5	5	7	8	8	53.4	53.4	53.4	11.367	103	103	0	79.231	51.5	39.8	41.7	52.4	53.4
sp|P46777|RL5_HUMAN;tr|Q5T7N0|Q5T7N0_HUMAN;tr|R4GNJ2|R4GNJ2_HUMAN	sp|P46777|RL5_HUMAN	8.83952	26.2084	12.1118	48273000	13522000	18008000	426710000	354390000	218110000	15;3;1	15;3;1	15;3;1	sp|P46777|RL5_HUMAN 60S ribosomal protein L5 OS=Homo sapiens GN=RPL5 PE=1 SV=3	3	15	15	15	6	4	4	13	11	10	6	4	4	13	11	10	6	4	4	13	11	10	37	37	37	34.362	297	297;130;63	0	152.57	20.9	18.9	13.8	34.7	23.9
sp|P31942|HNRH3_HUMAN	sp|P31942|HNRH3_HUMAN	3000300	4.54841	9.30407	1	15895000	5042200	3000300	72297000	46913000	5	5	5	sp|P31942|HNRH3_HUMAN Heterogeneous nuclear ribonucleoprotein H3 OS=Homo sapiens GN=HNRNPH3 PE=1 SV=2	1	5	5	5	1	1	1	2	4	2	1	1	1	2	4	2	1	1	1	2	4	2	19.7	19.7	19.7	36.926	346	346	0	194.24	4.9	4.9	4.9	7.2	17.3
sp|Q92841|DDX17_HUMAN;tr|H3BLZ8|H3BLZ8_HUMAN	sp|Q92841|DDX17_HUMAN;tr|H3BLZ8|H3BLZ8_HUMAN	1.92062	9.77379	8.61922	18494000	20158000	17099000	35520000	197020000	147380000	22;22	22;22	19;19	sp|Q92841|DDX17_HUMAN Probable ATP-dependent RNA helicase DDX17 OS=Homo sapiens GN=DDX17 PE=1 SV=2;tr|H3BLZ8|H3BLZ8_HUMAN Probable ATP-dependent RNA helicase DDX17 OS=Homo sapiens GN=DDX17 PE=1 SV=1	2	22	22	19	8	4	4	9	18	14	8	4	4	9	18	14	6	4	3	7	16	11	33.3	33.3	29.1	80.272	729	729;731	0	175.33	14	7.7	6.7	15.2	27.6
sp|P09661|RU2A_HUMAN;tr|H0YMA0|H0YMA0_HUMAN;tr|Q8TDP4|Q8TDP4_HUMAN;tr|H0YLR3|H0YLR3_HUMAN	sp|P09661|RU2A_HUMAN;tr|H0YMA0|H0YMA0_HUMAN;tr|Q8TDP4|Q8TDP4_HUMAN	1.68991	28065000	5.84438	9931300	1	7972100	16783000	28065000	46592000	7;4;4;3	7;4;4;3	7;4;4;3	sp|P09661|RU2A_HUMAN U2 small nuclear ribonucleoprotein A OS=Homo sapiens GN=SNRPA1 PE=1 SV=2;tr|H0YMA0|H0YMA0_HUMAN U2 small nuclear ribonucleoprotein A (Fragment) OS=Homo sapiens GN=SNRPA1 PE=1 SV=1;tr|Q8TDP4|Q8TDP4_HUMAN C-C chemokine receptor type 3	4	7	7	7	3	1	2	5	5	6	3	1	2	5	5	6	3	1	2	5	5	6	28.2	28.2	28.2	28.415	255	255;142;491;89	0	69.311	16.9	5.5	12.2	24.7	19.2
tr|A8MXP9|A8MXP9_HUMAN;sp|P43243|MATR3_HUMAN;tr|D6REM6|D6REM6_HUMAN;tr|D6R991|D6R991_HUMAN;tr|B3KM87|B3KM87_HUMAN;tr|H0Y8T4|H0Y8T4_HUMAN;tr|Q68E03|Q68E03_HUMAN;tr|D6R8Z5|D6R8Z5_HUMAN;tr|D6RE02|D6RE02_HUMAN;tr|D6RIA2|D6RIA2_HUMAN;tr|D6RB45|D6RB45_HUMAN;tr|D6R9F3|D6R9F3_HUMAN;tr|D6RBI2|D6RBI2_HUMAN;tr|D6REK4|D6REK4_HUMAN;tr|D6RCM3|D6RCM3_HUMAN;tr|D6RBS2|D6RBS2_HUMAN;tr|D6RAY2|D6RAY2_HUMAN;tr|D6RAM9…	tr|A8MXP9|A8MXP9_HUMAN;sp|P43243|MATR3_HUMAN;tr|D6REM6|D6REM6_HUMAN;tr|D6R991|D6R991_HUMAN	2.5158	3.01842	5.09854	38364000	42986000	27451000	96516000	129750000	139960000	22;22;21;15;9;6;4;3;2;2;2;2;2;2;2;2;2;2;2	22;22;21;15;9;6;4;3;2;2;2;2;2;2;2;2;2;2;2	22;22;21;15;9;6;4;3;2;2;2;2;2;2;2;2;2;2;2	tr|A8MXP9|A8MXP9_HUMAN Matrin-3 OS=Homo sapiens GN=MATR3 PE=1 SV=1;sp|P43243|MATR3_HUMAN Matrin-3 OS=Homo sapiens GN=MATR3 PE=1 SV=2;tr|D6REM6|D6REM6_HUMAN Matrin-3 OS=Homo sapiens GN=MATR3 PE=1 SV=1;tr|D6R991|D6R991_HUMAN Matrin-3 (Fragment) OS=Homo sapie	19	22	22	22	10	6	4	13	18	16	10	6	4	13	18	16	10	6	4	13	18	16	28.2	28.2	28.2	99.966	895	895;847;794;433;509;334;283;107;125;172;47;78;109;100;99;87;86;81;121	0	238.02	14	9.4	6.8	17.8	25.6
sp|Q15029|U5S1_HUMAN;tr|K7EP67|K7EP67_HUMAN;tr|K7EJ74|K7EJ74_HUMAN;sp|P13639|EF2_HUMAN	sp|Q15029|U5S1_HUMAN	0.932065	5.58136	4.86889	41746000	17182000	17413000	38910000	95899000	84782000	25;10;5;1	25;10;5;1	25;10;5;1	sp|Q15029|U5S1_HUMAN 116 kDa U5 small nuclear ribonucleoprotein component OS=Homo sapiens GN=EFTUD2 PE=1 SV=1	4	25	25	25	14	5	4	10	18	15	14	5	4	10	18	15	14	5	4	10	18	15	32.3	32.3	32.3	109.43	972	972;223;343;858	0	216.53	17.2	7.4	5	13.4	25.8
tr|G3V4W0|G3V4W0_HUMAN;tr|B4DY08|B4DY08_HUMAN;tr|B2R5W2|B2R5W2_HUMAN;tr|G3V4C1|G3V4C1_HUMAN;tr|G3V576|G3V576_HUMAN;tr|G3V2Q1|G3V2Q1_HUMAN;sp|P07910|HNRPC_HUMAN;tr|G3V555|G3V555_HUMAN;tr|G3V575|G3V575_HUMAN;tr|G3V5X6|G3V5X6_HUMAN;tr|G3V3K6|G3V3K6_HUMAN;tr|G3V251|G3V251_HUMAN;tr|B4DSU6|B4DSU6_HUMAN;tr|G3V2D6|G3V2D6_HUMAN;tr|G3V5V7|G3V5V7_HUMAN;tr|G3V4M8|G3V4M8_HUMAN	tr|G3V4W0|G3V4W0_HUMAN;tr|B4DY08|B4DY08_HUMAN;tr|B2R5W2|B2R5W2_HUMAN;tr|G3V4C1|G3V4C1_HUMAN;tr|G3V576|G3V576_HUMAN;tr|G3V2Q1|G3V2Q1_HUMAN;sp|P07910|HNRPC_HUMAN;tr|G3V555|G3V555_HUMAN;tr|G3V575|G3V575_HUMAN;tr|G3V5X6|G3V5X6_HUMAN;tr|G3V3K6|G3V3K6_HUMAN;tr|G3V251|G3V251_HUMAN;tr|B4DSU6|B4DSU6_HUMAN;tr|G3V2D6|G3V2D6_HUMAN	4.35671	3.014	4.80541	121640000	164230000	132740000	529950000	494990000	637870000	14;14;14;14;13;13;13;9;9;8;8;8;7;7;6;5	14;14;14;14;13;13;13;9;9;8;8;8;7;7;6;5	6;6;6;6;5;5;5;4;4;3;3;3;2;4;3;1	tr|G3V4W0|G3V4W0_HUMAN Heterogeneous nuclear ribonucleoproteins C1/C2 (Fragment) OS=Homo sapiens GN=HNRNPC PE=1 SV=1;tr|B4DY08|B4DY08_HUMAN Heterogeneous nuclear ribonucleoproteins C1/C2 OS=Homo sapiens GN=HNRNPC PE=1 SV=1;tr|B2R5W2|B2R5W2_HUMAN Heterogene	16	14	14	6	9	8	7	13	13	11	9	8	7	13	13	11	4	4	3	6	6	5	43.9	43.9	27.5	28.916	262	262;288;290;292;231;305;306;175;187;117;121;126;147;214;180;66	0	137.68	33.2	30.2	26.7	43.9	40.5
sp|Q00839|HNRPU_HUMAN;tr|Q5RI18|Q5RI18_HUMAN	sp|Q00839|HNRPU_HUMAN	2.08778	4.11083	4.30535	59695000	36596000	48154000	124630000	150440000	207320000	17;4	17;4	17;4	sp|Q00839|HNRPU_HUMAN Heterogeneous nuclear ribonucleoprotein U OS=Homo sapiens GN=HNRNPU PE=1 SV=6	2	17	17	17	9	5	5	12	17	12	9	5	5	12	17	12	9	5	5	12	17	12	21.2	21.2	21.2	90.583	825	825;242	0	155.67	12.4	7.4	8	18.3	21.2
tr|G8JLB6|G8JLB6_HUMAN;sp|P31943|HNRH1_HUMAN;tr|E9PCY7|E9PCY7_HUMAN;tr|D6RBM0|D6RBM0_HUMAN;tr|D6RIU0|D6RIU0_HUMAN;tr|D6RIT2|D6RIT2_HUMAN;tr|D6RIH9|D6RIH9_HUMAN;tr|D6RJ04|D6RJ04_HUMAN;tr|D6RDU3|D6RDU3_HUMAN;tr|E7EN40|E7EN40_HUMAN;tr|D6R9T0|D6R9T0_HUMAN;tr|D6RFM3|D6RFM3_HUMAN;tr|D6RAM1|D6RAM1_HUMAN;tr|E7EQJ0|E7EQJ0_HUMAN;tr|E5RGV0|E5RGV0_HUMAN;tr|D6RDL0|D6RDL0_HUMAN;tr|H0YB39|H0YB39_HUMAN;tr|H0YBD7…	tr|G8JLB6|G8JLB6_HUMAN;sp|P31943|HNRH1_HUMAN;tr|E9PCY7|E9PCY7_HUMAN;tr|D6RBM0|D6RBM0_HUMAN;tr|D6RIU0|D6RIU0_HUMAN;tr|D6RIT2|D6RIT2_HUMAN;tr|D6RIH9|D6RIH9_HUMAN;tr|D6RJ04|D6RJ04_HUMAN;tr|D6RDU3|D6RDU3_HUMAN;tr|E7EN40|E7EN40_HUMAN;tr|D6R9T0|D6R9T0_HUMAN;tr|D6RFM3|D6RFM3_HUMAN;tr|D6RAM1|D6RAM1_HUMAN;tr|E7EQJ0|E7EQJ0_HUMAN;tr|E5RGV0|E5RGV0_HUMAN	2.19591	5.36754	3.96129	46359000	103880000	82728000	101800000	557580000	327710000	12;12;12;9;8;7;7;7;7;7;7;7;7;7;6;5;5;4;3;3;3;3;2;2	12;12;12;9;8;7;7;7;7;7;7;7;7;7;6;5;5;4;3;3;3;3;2;2	6;6;6;5;5;5;5;5;5;4;5;5;5;5;3;4;1;1;1;1;1;3;2;2	tr|G8JLB6|G8JLB6_HUMAN Heterogeneous nuclear ribonucleoprotein H OS=Homo sapiens GN=HNRNPH1 PE=1 SV=1;sp|P31943|HNRH1_HUMAN Heterogeneous nuclear ribonucleoprotein H OS=Homo sapiens GN=HNRNPH1 PE=1 SV=4;tr|E9PCY7|E9PCY7_HUMAN Heterogeneous nuclear ribonucl	24	12	12	6	7	8	4	10	10	8	7	8	4	10	10	8	2	4	0	5	5	4	31.8	31.8	15.7	51.229	472	472;449;429;212;168;164;184;172;171;166;162;163;130;115;155;84;277;475;185;353;131;49;40;28	0	323.31	19.3	22	12.7	25.6	28.2
sp|Q9UMS4|PRP19_HUMAN;tr|F5GY56|F5GY56_HUMAN;tr|H0YGF3|H0YGF3_HUMAN;tr|F5H2I0|F5H2I0_HUMAN	sp|Q9UMS4|PRP19_HUMAN	1.39727	3.7991	2.96035	17784000	12454000	18715000	24849000	47314000	55403000	8;3;2;1	8;3;2;1	8;3;2;1	sp|Q9UMS4|PRP19_HUMAN Pre-mRNA-processing factor 19 OS=Homo sapiens GN=PRPF19 PE=1 SV=1	4	8	8	8	7	4	5	5	7	5	7	4	5	5	7	5	7	4	5	5	7	5	21	21	21	55.18	504	504;389;45;104	0	69.172	19.4	9.9	17.3	14.1	19.4
tr|J3QLE5|J3QLE5_HUMAN;sp|P63162|RSMN_HUMAN;sp|P14678|RSMB_HUMAN;tr|A8MT02|A8MT02_HUMAN;tr|J3KRY3|J3KRY3_HUMAN;tr|S4R3P3|S4R3P3_HUMAN	tr|J3QLE5|J3QLE5_HUMAN;sp|P63162|RSMN_HUMAN;sp|P14678|RSMB_HUMAN;tr|A8MT02|A8MT02_HUMAN	1.71519	5.31317	2.91305	20126000	9675200	12571000	34520000	51406000	36620000	6;6;6;6;2;2	6;6;6;6;2;2	6;6;6;6;2;2	tr|J3QLE5|J3QLE5_HUMAN Small nuclear ribonucleoprotein-associated protein N (Fragment) OS=Homo sapiens GN=SNRPN PE=4 SV=1;sp|P63162|RSMN_HUMAN Small nuclear ribonucleoprotein-associated protein N OS=Homo sapiens GN=SNRPN PE=1 SV=1;sp|P14678|RSMB_HUMAN Smal	6	6	6	6	4	2	2	3	5	5	4	2	2	3	5	5	4	2	2	3	5	5	26.6	26.6	26.6	17.546	169	169;240;240;288;59;70	0	41.685	22.5	9.5	8.9	18.3	26
sp|Q15393|SF3B3_HUMAN;tr|I3L4G7|I3L4G7_HUMAN;tr|H3BMB0|H3BMB0_HUMAN;tr|J3QRB2|J3QRB2_HUMAN;tr|J3QL37|J3QL37_HUMAN	sp|Q15393|SF3B3_HUMAN	1.58843	3.33834	2.15982	15057000	7858400	10587000	23917000	26234000	22866000	12;2;1;1;1	12;2;1;1;1	12;2;1;1;1	sp|Q15393|SF3B3_HUMAN Splicing factor 3B subunit 3 OS=Homo sapiens GN=SF3B3 PE=1 SV=4	5	12	12	12	7	2	3	8	9	8	7	2	3	8	9	8	7	2	3	8	9	8	13	13	13	135.58	1217	1217;72;30;31;58	0	99.887	7.1	2.3	3.5	8.6	9.9
sp|Q96A72|MGN2_HUMAN;tr|F5H6N1|F5H6N1_HUMAN;tr|F5H124|F5H124_HUMAN	sp|Q96A72|MGN2_HUMAN;tr|F5H6N1|F5H6N1_HUMAN	1.4991	3.12907	1.99835	18313000	9784700	12750000	27453000	30617000	25479000	6;3;1	6;3;1	1;1;1	sp|Q96A72|MGN2_HUMAN Protein mago nashi homolog 2 OS=Homo sapiens GN=MAGOHB PE=1 SV=1;tr|F5H6N1|F5H6N1_HUMAN Protein mago nashi homolog 2 OS=Homo sapiens GN=MAGOHB PE=1 SV=1	3	6	6	1	5	2	3	5	6	4	5	2	3	5	6	4	1	1	0	1	1	0	43.2	43.2	6.1	17.276	148	148;90;81	0	100.11	29.7	17.6	18.2	29.7	43.2
sp|Q9Y265|RUVB1_HUMAN;tr|E7ETR0|E7ETR0_HUMAN;tr|H7C4G5|H7C4G5_HUMAN;tr|J3QLR1|J3QLR1_HUMAN;tr|H7C4I3|H7C4I3_HUMAN	sp|Q9Y265|RUVB1_HUMAN;tr|E7ETR0|E7ETR0_HUMAN	0.94033	12380000	1.71579	15435000	1	10355000	14514000	12380000	17767000	10;6;4;3;1	10;6;4;3;1	10;6;4;3;1	sp|Q9Y265|RUVB1_HUMAN RuvB-like 1 OS=Homo sapiens GN=RUVBL1 PE=1 SV=1;tr|E7ETR0|E7ETR0_HUMAN RuvB-like 1 OS=Homo sapiens GN=RUVBL1 PE=1 SV=1	5	10	10	10	4	1	4	4	8	4	4	1	4	4	8	4	4	1	4	4	8	4	30.9	30.9	30.9	50.227	456	456;315;267;131;222	0	91.441	11.4	2.4	11.2	10.5	25.7
sp|P0CG48|UBC_HUMAN;tr|F5H265|F5H265_HUMAN;tr|Q96C32|Q96C32_HUMAN;sp|P0CG47|UBB_HUMAN;tr|Q5PY61|Q5PY61_HUMAN;tr|J3QKN0|J3QKN0_HUMAN;tr|F5GXK7|F5GXK7_HUMAN;tr|F5H747|F5H747_HUMAN;sp|P62979|RS27A_HUMAN;tr|B4DV12|B4DV12_HUMAN;tr|F5H388|F5H388_HUMAN;tr|F5H2Z3|F5H2Z3_HUMAN;tr|F5GYU3|F5GYU3_HUMAN;sp|P62987|RL40_HUMAN;tr|F5H6Q2|F5H6Q2_HUMAN;tr|J3QTR3|J3QTR3_HUMAN;tr|J3QS39|J3QS39_HUMAN;tr|M0R2S1|M0R2S1_…	sp|P0CG48|UBC_HUMAN;tr|F5H265|F5H265_HUMAN;tr|Q96C32|Q96C32_HUMAN;sp|P0CG47|UBB_HUMAN;tr|Q5PY61|Q5PY61_HUMAN;tr|J3QKN0|J3QKN0_HUMAN;tr|F5GXK7|F5GXK7_HUMAN;tr|F5H747|F5H747_HUMAN;sp|P62979|RS27A_HUMAN;tr|B4DV12|B4DV12_HUMAN;tr|F5H388|F5H388_HUMAN;tr|F5H2Z3|F5H2Z3_HUMAN;tr|F5GYU3|F5GYU3_HUMAN;sp|P62987|RL40_HUMAN;tr|F5H6Q2|F5H6Q2_HUMAN;tr|J3QTR3|J3QTR3_HUMAN;tr|J3QS39|J3QS39_HUMAN;tr|M0R2S1|M0R2S1_…	0.713267	3.75799	1.65401	36330000	31115000	39834000	25913000	116930000	65886000	3;3;3;3;3;3;3;3;3;3;3;3;3;3;3;3;3;2;2;2;2;2;1;1;1;1	3;3;3;3;3;3;3;3;3;3;3;3;3;3;3;3;3;2;2;2;2;2;1;1;1;1	3;3;3;3;3;3;3;3;3;3;3;3;3;3;3;3;3;2;2;2;2;2;1;1;1;1	sp|P0CG48|UBC_HUMAN Polyubiquitin-C OS=Homo sapiens GN=UBC PE=1 SV=3;tr|F5H265|F5H265_HUMAN Polyubiquitin-C (Fragment) OS=Homo sapiens GN=UBC PE=1 SV=1;tr|Q96C32|Q96C32_HUMAN Polyubiquitin-C OS=Homo sapiens GN=UBC PE=1 SV=1;sp|P0CG47|UBB_HUMAN Polyubiquiti	26	3	3	3	3	2	2	2	3	3	3	2	2	2	3	3	3	2	2	2	3	3	44.7	44.7	44.7	77.038	685	685;149;305;229;229;206;169;161;156;153;155;136;134;128;123;106;93;138;224;229;63;400;53;61;420;43	0	64.587	44.7	32.8	32.8	32.8	44.7
sp|P35580|MYH10_HUMAN;tr|E7ERA5|E7ERA5_HUMAN;tr|A0A0C4DFM8|A0A0C4DFM8_HUMAN;tr|A1L2Z2|A1L2Z2_HUMAN	sp|P35580|MYH10_HUMAN	0.796233	0.51895	1.40016	82516000	12628000	5333600	65702000	6553300	7467900	31;1;1;1	31;1;1;1	21;1;0;0	sp|P35580|MYH10_HUMAN Myosin-10 OS=Homo sapiens GN=MYH10 PE=1 SV=3	4	31	31	21	30	3	2	17	6	3	30	3	2	17	6	3	21	2	0	12	4	1	19.6	19.6	14.5	229	1976	1976;188;508;638	0	243.86	19.1	1.9	1.1	10.5	4
sp|P07197|NFM_HUMAN;tr|E7ESP9|E7ESP9_HUMAN;tr|E7EMV2|E7EMV2_HUMAN	sp|P07197|NFM_HUMAN;tr|E7ESP9|E7ESP9_HUMAN;tr|E7EMV2|E7EMV2_HUMAN	1.37673	0.776749	1.38554	23571000	15234000	6463400	32451000	11833000	8955300	12;12;11	11;11;10	10;10;9	sp|P07197|NFM_HUMAN Neurofilament medium polypeptide OS=Homo sapiens GN=NEFM PE=1 SV=3;tr|E7ESP9|E7ESP9_HUMAN Neurofilament medium polypeptide OS=Homo sapiens GN=NEFM PE=1 SV=1;tr|E7EMV2|E7EMV2_HUMAN Neurofilament medium polypeptide OS=Homo sapiens GN=NEFM	3	12	11	10	9	4	3	11	5	3	8	3	2	10	5	3	8	3	2	9	5	3	15.3	14.3	13.4	102.47	916	916;877;698	0	84.559	11.9	5.1	3.4	14.4	7.4
sp|Q5VTE0|EF1A3_HUMAN;sp|P68104|EF1A1_HUMAN;tr|A0A087WVQ9|A0A087WVQ9_HUMAN;tr|A0A087WV01|A0A087WV01_HUMAN;sp|Q05639|EF1A2_HUMAN;tr|A6PW80|A6PW80_HUMAN;tr|Q5JR01|Q5JR01_HUMAN	sp|Q5VTE0|EF1A3_HUMAN;sp|P68104|EF1A1_HUMAN;tr|A0A087WVQ9|A0A087WVQ9_HUMAN;tr|A0A087WV01|A0A087WV01_HUMAN;sp|Q05639|EF1A2_HUMAN	0.843603	1.67155	1.34218	27590000	10583000	14469000	23275000	17690000	19420000	6;6;5;4;4;2;2	6;6;5;4;4;2;2	6;6;5;4;4;2;2	sp|Q5VTE0|EF1A3_HUMAN Putative elongation factor 1-alpha-like 3 OS=Homo sapiens GN=EEF1A1P5 PE=5 SV=1;sp|P68104|EF1A1_HUMAN Elongation factor 1-alpha 1 OS=Homo sapiens GN=EEF1A1 PE=1 SV=1;tr|A0A087WVQ9|A0A087WVQ9_HUMAN Elongation factor 1-alpha 1 OS=Homo s	7	6	6	6	4	3	3	5	3	3	4	3	3	5	3	3	4	3	3	5	3	3	16.7	16.7	16.7	50.184	462	462;462;441;426;463;107;145	0	46.135	9.7	7.6	7.6	11.5	10.2
sp|Q9BYX7|ACTBM_HUMAN;tr|M0QYC8|M0QYC8_HUMAN;tr|H0Y3X1|H0Y3X1_HUMAN;tr|J3QKU0|J3QKU0_HUMAN;tr|J3QRD3|J3QRD3_HUMAN;tr|J3KQD8|J3KQD8_HUMAN;tr|F2Z2V1|F2Z2V1_HUMAN;tr|F8VVU7|F8VVU7_HUMAN;sp|Q6S8J3|POTEE_HUMAN;sp|A5A3E0|POTEF_HUMAN;sp|P0CG38|POTEI_HUMAN;sp|P0CG39|POTEJ_HUMAN	sp|Q9BYX7|ACTBM_HUMAN;tr|M0QYC8|M0QYC8_HUMAN;tr|H0Y3X1|H0Y3X1_HUMAN	1.08678	1.21124	1.11626	2757600000	586310000	553570000	2996900000	710160000	617930000	21;13;13;10;10;9;9;9;7;7;6;4	13;6;6;3;6;2;2;2;3;3;2;2	5;2;2;0;2;0;0;0;1;1;1;1	sp|Q9BYX7|ACTBM_HUMAN Putative beta-actin-like protein 3 OS=Homo sapiens GN=POTEKP PE=5 SV=1;tr|M0QYC8|M0QYC8_HUMAN Complement C3 (Fragment) OS=Homo sapiens GN=C3 PE=1 SV=1;tr|H0Y3X1|H0Y3X1_HUMAN Hemicentin-2 (Fragment) OS=Homo sapiens GN=HMCN2 PE=1 SV=2	12	21	13	5	16	15	10	14	17	15	11	10	6	9	9	9	5	5	2	3	5	4	36.2	25.9	9.5	185.27	1721	1721;489;606;395;658;507;723;1074;1075;1075;1075;1038	0	311.61	31.5	27.1	18.5	26.8	28.9
sp|P11142|HSP7C_HUMAN;tr|E9PKE3|E9PKE3_HUMAN;tr|E9PN89|E9PN89_HUMAN;tr|E9PNE6|E9PNE6_HUMAN;tr|E9PLF4|E9PLF4_HUMAN;tr|E9PQQ4|E9PQQ4_HUMAN;tr|E9PQK7|E9PQK7_HUMAN;tr|E9PK54|E9PK54_HUMAN;sp|P54652|HSP72_HUMAN;tr|A8K7Q2|A8K7Q2_HUMAN;tr|E9PPY6|E9PPY6_HUMAN;tr|E9PI65|E9PI65_HUMAN;tr|E9PN25|E9PN25_HUMAN;tr|E9PM13|E9PM13_HUMAN;tr|E9PS65|E9PS65_HUMAN	sp|P11142|HSP7C_HUMAN;tr|E9PKE3|E9PKE3_HUMAN;tr|E9PN89|E9PN89_HUMAN;tr|E9PNE6|E9PNE6_HUMAN;tr|E9PLF4|E9PLF4_HUMAN	0.701199	0.811631	1.08877	125950000	76642000	58362000	88316000	62205000	63543000	22;21;15;12;11;10;10;10;10;9;8;8;6;3;3	22;21;15;12;11;10;10;10;10;9;8;8;6;3;3	17;16;13;8;9;9;9;9;5;6;7;6;5;1;1	sp|P11142|HSP7C_HUMAN Heat shock cognate 71 kDa protein OS=Homo sapiens GN=HSPA8 PE=1 SV=1;tr|E9PKE3|E9PKE3_HUMAN Heat shock cognate 71 kDa protein OS=Homo sapiens GN=HSPA8 PE=1 SV=1;tr|E9PN89|E9PN89_HUMAN Heat shock cognate 71 kDa protein (Fragment) OS=Ho	15	22	22	17	20	13	8	15	14	13	20	13	8	15	14	13	16	10	7	12	11	11	35.1	35.1	30.3	70.897	646	646;627;312;500;187;171;178;184;639;1096;137;168;132;151;223	0	170.52	30.2	24.3	18.1	26	24.9
sp|P11021|GRP78_HUMAN	sp|P11021|GRP78_HUMAN	1.09427	0.947127	1.01569	10279000	11329000	11600000	11248000	10730000	11782000	10	9	9	sp|P11021|GRP78_HUMAN 78 kDa glucose-regulated protein OS=Homo sapiens GN=HSPA5 PE=1 SV=2	1	10	9	9	7	4	2	8	7	7	6	3	2	7	6	6	6	3	2	7	6	6	10.3	10.3	10.3	139.63	1272	1272	0	80.993	7.2	3.8	2.7	8.3	6.9
REV__sp|Q8N6Q8|MET25_HUMAN	REV__sp|Q8N6Q8|MET25_HUMAN	1	536580000	1	1	1	1	1	536580000	1	1	1	1	sp|Q8N6Q8|MET25_HUMAN Methyltransferase-like protein 25 OS=Homo sapiens GN=METTL25 PE=2 SV=2	1	1	1	1	0	0	0	0	1	0	0	0	0	0	1	0	0	0	0	0	1	0	0	0	0	68.213	603	603	0.006993	6.4051	0	0	0	0	0
sp|P62318|SMD3_HUMAN	sp|P62318|SMD3_HUMAN	1.38283	12.3673	1	19327000	8098000	1	26726000	100150000	1	2	2	2	sp|P62318|SMD3_HUMAN Small nuclear ribonucleoprotein Sm D3 OS=Homo sapiens GN=SNRPD3 PE=1 SV=1	1	2	2	2	2	2	1	2	2	1	2	2	1	2	2	1	2	2	1	2	2	1	15.1	15.1	15.1	13.916	126	126	0	16.517	15.1	15.1	7.1	15.1	15.1
sp|P61978|HNRPK_HUMAN;tr|S4R457|S4R457_HUMAN;tr|S4R359|S4R359_HUMAN	sp|P61978|HNRPK_HUMAN	2.20146	3.57016	1	41536000	12884000	1	91440000	45998000	1	19;5;4	4;0;3	4;0;3	sp|P61978|HNRPK_HUMAN Heterogeneous nuclear ribonucleoprotein K OS=Homo sapiens GN=HNRNPK PE=1 SV=1	3	19	4	4	16	9	9	18	12	10	3	2	1	3	1	1	3	2	1	3	1	1	46	11	11	50.976	463	463;77;100	0	41.313	37.8	27.2	25.3	44.3	34.8
sp|P62266|RS23_HUMAN;tr|D6RD47|D6RD47_HUMAN	sp|P62266|RS23_HUMAN;tr|D6RD47|D6RD47_HUMAN	1	35444000	1	1	1	1	1	35444000	1	3;2	3;2	3;2	sp|P62266|RS23_HUMAN 40S ribosomal protein S23 OS=Homo sapiens GN=RPS23 PE=1 SV=3;tr|D6RD47|D6RD47_HUMAN 40S ribosomal protein S23 OS=Homo sapiens GN=RPS23 PE=1 SV=1	2	3	3	3	0	0	0	1	2	2	0	0	0	1	2	2	0	0	0	1	2	2	16.1	16.1	16.1	15.807	143	143;684	0	20.494	0	0	0	7.7	15.4
sp|Q969X6|CIR1A_HUMAN;tr|H3BSH7|H3BSH7_HUMAN;tr|H3BPD7|H3BPD7_HUMAN;tr|J3KSI1|J3KSI1_HUMAN;tr|J3KSE6|J3KSE6_HUMAN;tr|J3KTR0|J3KTR0_HUMAN;tr|I3L4T9|I3L4T9_HUMAN;tr|H3BRM8|H3BRM8_HUMAN	sp|Q969X6|CIR1A_HUMAN;tr|H3BSH7|H3BSH7_HUMAN	1	27843000	1	1	1	1	1	27843000	1	6;5;2;2;1;1;1;1	6;5;2;2;1;1;1;1	6;5;2;2;1;1;1;1	sp|Q969X6|CIR1A_HUMAN Cirhin OS=Homo sapiens GN=CIRH1A PE=1 SV=1;tr|H3BSH7|H3BSH7_HUMAN Cirhin (Fragment) OS=Homo sapiens GN=CIRH1A PE=1 SV=1	8	6	6	6	0	0	0	0	6	1	0	0	0	0	6	1	0	0	0	0	6	1	11.4	11.4	11.4	76.889	686	686;700;148;198;79;143;182;211	0	44.842	0	0	0	0	11.4
sp|Q16778|H2B2E_HUMAN;sp|P33778|H2B1B_HUMAN;sp|P23527|H2B1O_HUMAN;sp|P06899|H2B1J_HUMAN;sp|Q8N257|H2B3B_HUMAN;sp|Q6DRA6|H2B2D_HUMAN;sp|Q6DN03|H2B2C_HUMAN	sp|Q16778|H2B2E_HUMAN;sp|P33778|H2B1B_HUMAN;sp|P23527|H2B1O_HUMAN;sp|P06899|H2B1J_HUMAN;sp|Q8N257|H2B3B_HUMAN	13388000	24983000	1	1	1	1	13388000	24983000	1	8;8;8;8;7;3;3	2;2;2;2;2;2;2	2;2;2;2;2;2;2	sp|Q16778|H2B2E_HUMAN Histone H2B type 2-E OS=Homo sapiens GN=HIST2H2BE PE=1 SV=3;sp|P33778|H2B1B_HUMAN Histone H2B type 1-B OS=Homo sapiens GN=HIST1H2BB PE=1 SV=2;sp|P23527|H2B1O_HUMAN Histone H2B type 1-O OS=Homo sapiens GN=HIST1H2BO PE=1 SV=3;sp|P06899|	7	8	2	2	3	0	0	4	8	6	0	0	0	2	2	1	0	0	0	2	2	1	53.2	7.9	7.9	13.92	126	126;126;126;126;126;164;193	0	13.792	21.4	0	0	25.4	53.2
sp|Q9NQ55|SSF1_HUMAN;tr|A0A0A6YYI3|A0A0A6YYI3_HUMAN;tr|A0A0B4J1V8|A0A0B4J1V8_HUMAN;tr|Q5FC07|Q5FC07_HUMAN;tr|H7C446|H7C446_HUMAN;tr|C9JHF7|C9JHF7_HUMAN;tr|C9J3W3|C9J3W3_HUMAN	sp|Q9NQ55|SSF1_HUMAN;tr|A0A0A6YYI3|A0A0A6YYI3_HUMAN;tr|A0A0B4J1V8|A0A0B4J1V8_HUMAN;tr|Q5FC07|Q5FC07_HUMAN;tr|H7C446|H7C446_HUMAN	1	23300000	1	1	1	1	1	23300000	1	5;5;5;4;3;1;1	5;5;5;4;3;1;1	5;5;5;4;3;1;1	sp|Q9NQ55|SSF1_HUMAN Suppressor of SWI4 1 homolog OS=Homo sapiens GN=PPAN PE=1 SV=1;tr|A0A0A6YYI3|A0A0A6YYI3_HUMAN Protein PPAN-P2RY11 OS=Homo sapiens GN=PPAN-P2RY11 PE=1 SV=1;tr|A0A0B4J1V8|A0A0B4J1V8_HUMAN HCG2039996 OS=Homo sapiens GN=PPAN-P2RY11 PE=1 SV	7	5	5	5	0	0	0	0	3	3	0	0	0	0	3	3	0	0	0	0	3	3	11.8	11.8	11.8	53.193	473	473;520;1292;552;208;97;412	0	49.175	0	0	0	0	7.4
sp|Q9UHA3|RLP24_HUMAN;tr|H3BMQ2|H3BMQ2_HUMAN	sp|Q9UHA3|RLP24_HUMAN;tr|H3BMQ2|H3BMQ2_HUMAN	1	15810000	1	1	1	1	1	15810000	1	3;2	3;2	3;2	sp|Q9UHA3|RLP24_HUMAN Probable ribosome biogenesis protein RLP24 OS=Homo sapiens GN=RSL24D1 PE=1 SV=1;tr|H3BMQ2|H3BMQ2_HUMAN Probable ribosome biogenesis protein RLP24 (Fragment) OS=Homo sapiens GN=RSL24D1 PE=1 SV=1	2	3	3	3	0	0	0	0	2	2	0	0	0	0	2	2	0	0	0	0	2	2	0.2	0.2	0.2	1548	14410	14410;66	0	23.017	0	0	0	0	0.1
tr|Q5TEC6|Q5TEC6_HUMAN	tr|Q5TEC6|Q5TEC6_HUMAN	1	14331000	1	1	1	1	1	14331000	1	3	1	1	tr|Q5TEC6|Q5TEC6_HUMAN Histone H3 OS=Homo sapiens GN=HIST2H3PS2 PE=1 SV=1	1	3	1	1	1	1	2	2	2	0	0	0	0	0	1	0	0	0	0	0	1	0	19.9	8.1	8.1	15.43	136	136	0.0095109	6.2633	6.6	6.6	11.8	11.8	14.7
tr|D6R9E3|D6R9E3_HUMAN	tr|D6R9E3|D6R9E3_HUMAN	1	12274000	1	1	1	1	1	12274000	1	1	1	1	tr|D6R9E3|D6R9E3_HUMAN Meiotic nuclear division protein 1 homolog OS=Homo sapiens GN=MND1 PE=1 SV=1	1	1	1	1	0	0	0	0	1	0	0	0	0	0	1	0	0	0	0	0	1	0	6.7	6.7	6.7	18.983	165	165	0.0056899	6.518	0	0	0	0	6.7
sp|Q15024|EXOS7_HUMAN	sp|Q15024|EXOS7_HUMAN	1	12108000	1	1	1	1	1	12108000	1	2	2	2	sp|Q15024|EXOS7_HUMAN Exosome complex component RRP42 OS=Homo sapiens GN=EXOSC7 PE=1 SV=3	1	2	2	2	0	0	0	0	2	1	0	0	0	0	2	1	0	0	0	0	2	1	8.9	8.9	8.9	31.821	291	291	0	17.667	0	0	0	0	8.9
sp|Q9NY12|GAR1_HUMAN	sp|Q9NY12|GAR1_HUMAN	1	11636000	1	1	1	1	1	11636000	1	2	2	2	sp|Q9NY12|GAR1_HUMAN H/ACA ribonucleoprotein complex subunit 1 OS=Homo sapiens GN=GAR1 PE=1 SV=1	1	2	2	2	0	0	0	1	2	1	0	0	0	1	2	1	0	0	0	1	2	1	7.4	7.4	7.4	22.348	217	217	0	11.748	0	0	0	4.1	7.4
sp|Q12788|TBL3_HUMAN;tr|J3KNP2|J3KNP2_HUMAN;tr|A0A087WYP7|A0A087WYP7_HUMAN	sp|Q12788|TBL3_HUMAN;tr|J3KNP2|J3KNP2_HUMAN	1	11019000	1	1	1	1	1	11019000	1	5;4;1	5;4;1	5;4;1	sp|Q12788|TBL3_HUMAN Transducin beta-like protein 3 OS=Homo sapiens GN=TBL3 PE=1 SV=2;tr|J3KNP2|J3KNP2_HUMAN Transducin beta-like protein 3 (Fragment) OS=Homo sapiens GN=TBL3 PE=1 SV=1	3	5	5	5	0	0	0	0	4	2	0	0	0	0	4	2	0	0	0	0	4	2	9.2	9.2	9.2	89.034	808	808;697;518	0	34.546	0	0	0	0	7.4
sp|Q16643|DREB_HUMAN;tr|D6R9W4|D6R9W4_HUMAN;tr|D6R9Q9|D6R9Q9_HUMAN;tr|D6RFI1|D6RFI1_HUMAN	sp|Q16643|DREB_HUMAN;tr|D6R9W4|D6R9W4_HUMAN;tr|D6R9Q9|D6R9Q9_HUMAN	0.956573	10692000	1	21208000	1	1	20287000	10692000	1	8;5;4;3	8;5;4;3	8;5;4;3	sp|Q16643|DREB_HUMAN Drebrin OS=Homo sapiens GN=DBN1 PE=1 SV=4;tr|D6R9W4|D6R9W4_HUMAN Drebrin (Fragment) OS=Homo sapiens GN=DBN1 PE=1 SV=1;tr|D6R9Q9|D6R9Q9_HUMAN Drebrin OS=Homo sapiens GN=DBN1 PE=1 SV=1	4	8	8	8	8	1	1	6	3	1	8	1	1	6	3	1	8	1	1	6	3	1	16.2	16.2	16.2	71.428	649	649;317;391;376	0	78.863	16.2	3.1	3.1	12.9	6.3
sp|Q9BXY0|MAK16_HUMAN;tr|H0YBV6|H0YBV6_HUMAN	sp|Q9BXY0|MAK16_HUMAN;tr|H0YBV6|H0YBV6_HUMAN	1	10405000	1	1	1	1	1	10405000	1	4;2	4;2	4;2	sp|Q9BXY0|MAK16_HUMAN Protein MAK16 homolog OS=Homo sapiens GN=MAK16 PE=1 SV=2;tr|H0YBV6|H0YBV6_HUMAN Protein MAK16 homolog (Fragment) OS=Homo sapiens GN=MAK16 PE=1 SV=1	2	4	4	4	0	0	0	0	4	1	0	0	0	0	4	1	0	0	0	0	4	1	16	16	16	35.368	300	300;137	0	39.795	0	0	0	0	16
sp|Q13243|SRSF5_HUMAN;tr|B4DJK0|B4DJK0_HUMAN;tr|B4DUA4|B4DUA4_HUMAN;tr|A0A0D9SEM4|A0A0D9SEM4_HUMAN;sp|Q08170|SRSF4_HUMAN	sp|Q13243|SRSF5_HUMAN	1	10361000	1	1	1	1	1	10361000	1	4;1;1;1;1	3;0;0;0;0	3;0;0;0;0	sp|Q13243|SRSF5_HUMAN Serine/arginine-rich splicing factor 5 OS=Homo sapiens GN=SRSF5 PE=1 SV=1	5	4	3	3	1	0	0	1	4	2	0	0	0	0	3	1	0	0	0	0	3	1	16.5	13.2	13.2	31.263	272	272;124;138;378;494	0	39.032	3.3	0	0	3.3	16.5
sp|Q71RC2|LARP4_HUMAN;tr|F8W1I4|F8W1I4_HUMAN;tr|Q8TBL5|Q8TBL5_HUMAN;tr|A0A087WTL9|A0A087WTL9_HUMAN;tr|F8VY40|F8VY40_HUMAN;tr|Q6P4E2|Q6P4E2_HUMAN;tr|Q96J85|Q96J85_HUMAN;tr|X6RLN4|X6RLN4_HUMAN	sp|Q71RC2|LARP4_HUMAN;tr|F8W1I4|F8W1I4_HUMAN;tr|Q8TBL5|Q8TBL5_HUMAN;tr|A0A087WTL9|A0A087WTL9_HUMAN;tr|F8VY40|F8VY40_HUMAN;tr|Q6P4E2|Q6P4E2_HUMAN;tr|Q96J85|Q96J85_HUMAN;tr|X6RLN4|X6RLN4_HUMAN	1	10357000	1	1	1	1	1	10357000	1	2;1;1;1;1;1;1;1	2;1;1;1;1;1;1;1	2;1;1;1;1;1;1;1	sp|Q71RC2|LARP4_HUMAN La-related protein 4 OS=Homo sapiens GN=LARP4 PE=1 SV=3;tr|F8W1I4|F8W1I4_HUMAN La-related protein 4 (Fragment) OS=Homo sapiens GN=LARP4 PE=1 SV=1;tr|Q8TBL5|Q8TBL5_HUMAN LARP4 protein OS=Homo sapiens GN=LARP4 PE=1 SV=1;tr|A0A087WTL9|A0	8	2	2	2	0	0	0	1	2	1	0	0	0	1	2	1	0	0	0	1	2	1	3.2	3.2	3.2	80.595	724	724;125;188;188;191;374;375;491	0	20.398	0	0	0	1.8	3.2
tr|J3KQ96|J3KQ96_HUMAN;tr|E7ETY2|E7ETY2_HUMAN;sp|Q13428|TCOF_HUMAN	tr|J3KQ96|J3KQ96_HUMAN;tr|E7ETY2|E7ETY2_HUMAN;sp|Q13428|TCOF_HUMAN	1	9852000	1	1	1	1	1	9852000	1	1;1;1	1;1;1	1;1;1	tr|J3KQ96|J3KQ96_HUMAN Treacle protein (Fragment) OS=Homo sapiens GN=TCOF1 PE=1 SV=1;tr|E7ETY2|E7ETY2_HUMAN Treacle protein OS=Homo sapiens GN=TCOF1 PE=1 SV=1;sp|Q13428|TCOF_HUMAN Treacle protein OS=Homo sapiens GN=TCOF1 PE=1 SV=3	3	1	1	1	0	0	0	0	1	0	0	0	0	0	1	0	0	0	0	0	1	0	0.7	0.7	0.7	144.12	1414	1414;1488;1488	0.0082079	6.2961	0	0	0	0	0.7
sp|P61964|WDR5_HUMAN;tr|V9GZ59|V9GZ59_HUMAN;tr|V9GYQ5|V9GYQ5_HUMAN	sp|P61964|WDR5_HUMAN	0.799508	9560100	1	5568300	1	1	4451900	9560100	1	5;2;1	5;2;1	5;2;1	sp|P61964|WDR5_HUMAN WD repeat-containing protein 5 OS=Homo sapiens GN=WDR5 PE=1 SV=1	3	5	5	5	3	0	0	3	3	2	3	0	0	3	3	2	3	0	0	3	3	2	24.3	24.3	24.3	36.588	334	334;97;56	0	30.792	15.6	0	0	12.6	12.6
tr|H0YHH4|H0YHH4_HUMAN	tr|H0YHH4|H0YHH4_HUMAN	1	9249700	1	1	1	1	1	9249700	1	1	1	1	tr|H0YHH4|H0YHH4_HUMAN KAT8 regulatory NSL complex subunit 2 (Fragment) OS=Homo sapiens GN=KANSL2 PE=4 SV=1	1	1	1	1	0	0	0	0	1	0	0	0	0	0	1	0	0	0	0	0	1	0	44	44	44	2.7741	25	25	1	-2	0	0	0	0	44
sp|O75934|SPF27_HUMAN	sp|O75934|SPF27_HUMAN	3883900	9016100	1	1	1	1	3883900	9016100	1	4	4	4	sp|O75934|SPF27_HUMAN Pre-mRNA-splicing factor SPF27 OS=Homo sapiens GN=BCAS2 PE=1 SV=1	1	4	4	4	1	0	0	2	4	1	1	0	0	2	4	1	1	0	0	2	4	1	23.6	23.6	23.6	26.131	225	225	0	26.706	5.8	0	0	11.6	23.6
sp|Q00577|PURA_HUMAN	sp|Q00577|PURA_HUMAN	1	8695900	1	1	1	1	1	8695900	1	3	3	3	sp|Q00577|PURA_HUMAN Transcriptional activator protein Pur-alpha OS=Homo sapiens GN=PURA PE=1 SV=2	1	3	3	3	0	0	0	0	3	1	0	0	0	0	3	1	0	0	0	0	3	1	18	18	18	34.91	322	322	0	20.77	0	0	0	0	18
sp|Q4G0J3|LARP7_HUMAN;tr|H0YA82|H0YA82_HUMAN;tr|D6R9Z6|D6R9Z6_HUMAN;tr|D6RFF0|D6RFF0_HUMAN	sp|Q4G0J3|LARP7_HUMAN;tr|H0YA82|H0YA82_HUMAN	1	8433300	1	1	1	1	1	8433300	1	3;2;1;1	3;2;1;1	3;2;1;1	sp|Q4G0J3|LARP7_HUMAN La-related protein 7 OS=Homo sapiens GN=LARP7 PE=1 SV=1;tr|H0YA82|H0YA82_HUMAN La-related protein 7 (Fragment) OS=Homo sapiens GN=LARP7 PE=1 SV=1	4	3	3	3	0	0	0	0	3	2	0	0	0	0	3	2	0	0	0	0	3	2	8.1	8.1	8.1	66.898	582	582;334;155;299	0	27.705	0	0	0	0	8.1
sp|Q09028|RBBP4_HUMAN;tr|H0YEU5|H0YEU5_HUMAN;tr|H0YCT5|H0YCT5_HUMAN;tr|H0YDK2|H0YDK2_HUMAN;tr|H0YF10|H0YF10_HUMAN;tr|E9PC52|E9PC52_HUMAN;sp|Q16576|RBBP7_HUMAN;tr|E9PNS2|E9PNS2_HUMAN;tr|E9PIC4|E9PIC4_HUMAN;tr|E9PNS6|E9PNS6_HUMAN;tr|Q5JP02|Q5JP02_HUMAN;tr|C9JAJ9|C9JAJ9_HUMAN	sp|Q09028|RBBP4_HUMAN;tr|H0YEU5|H0YEU5_HUMAN;tr|H0YCT5|H0YCT5_HUMAN;tr|H0YDK2|H0YDK2_HUMAN;tr|H0YF10|H0YF10_HUMAN;tr|E9PC52|E9PC52_HUMAN;sp|Q16576|RBBP7_HUMAN	1.48176	0.529867	1	6548100	15780000	1	9702700	8361300	1	5;3;3;3;3;3;3;2;2;2;2;1	5;3;3;3;3;3;3;2;2;2;2;1	5;3;3;3;3;3;3;2;2;2;2;1	sp|Q09028|RBBP4_HUMAN Histone-binding protein RBBP4 OS=Homo sapiens GN=RBBP4 PE=1 SV=3;tr|H0YEU5|H0YEU5_HUMAN Histone-binding protein RBBP4 (Fragment) OS=Homo sapiens GN=RBBP4 PE=1 SV=1;tr|H0YCT5|H0YCT5_HUMAN Histone-binding protein RBBP4 (Fragment) OS=Hom	12	5	5	5	4	2	1	2	4	1	4	2	1	2	4	1	4	2	1	2	4	1	15.3	15.3	15.3	47.655	425	425;167;180;262;396;416;425;62;87;104;175;37	0	33.72	13.2	5.2	3.3	5.2	13.6
sp|Q13206|DDX10_HUMAN;tr|E9PIF2|E9PIF2_HUMAN	sp|Q13206|DDX10_HUMAN;tr|E9PIF2|E9PIF2_HUMAN	1	8047700	1	1	1	1	1	8047700	1	7;7	7;7	7;7	sp|Q13206|DDX10_HUMAN Probable ATP-dependent RNA helicase DDX10 OS=Homo sapiens GN=DDX10 PE=1 SV=2;tr|E9PIF2|E9PIF2_HUMAN Probable ATP-dependent RNA helicase DDX10 OS=Homo sapiens GN=DDX10 PE=1 SV=1	2	7	7	7	1	0	0	1	4	3	1	0	0	1	4	3	1	0	0	1	4	3	10.6	10.6	10.6	100.89	875	875;1030	0	46.61	0.8	0	0	0.8	7.1
sp|P51991|ROA3_HUMAN	sp|P51991|ROA3_HUMAN	3710800	7997000	1	1	1	1	3710800	7997000	1	3	3	3	sp|P51991|ROA3_HUMAN Heterogeneous nuclear ribonucleoprotein A3 OS=Homo sapiens GN=HNRNPA3 PE=1 SV=2	1	3	3	3	1	0	0	3	2	1	1	0	0	3	2	1	1	0	0	3	2	1	10.8	10.8	10.8	39.594	378	378	0	23.19	4.2	0	0	10.8	6.9
sp|Q8IWA0|WDR75_HUMAN	sp|Q8IWA0|WDR75_HUMAN	1	7914000	1	1	1	1	1	7914000	1	3	3	3	sp|Q8IWA0|WDR75_HUMAN WD repeat-containing protein 75 OS=Homo sapiens GN=WDR75 PE=1 SV=1	1	3	3	3	0	0	0	0	3	1	0	0	0	0	3	1	0	0	0	0	3	1	5.3	5.3	5.3	94.498	830	830	0	19.748	0	0	0	0	5.3
sp|Q99575|POP1_HUMAN;tr|E5RK39|E5RK39_HUMAN	sp|Q99575|POP1_HUMAN	1	7768700	1	1	1	1	1	7768700	1	5;1	5;1	5;1	sp|Q99575|POP1_HUMAN Ribonucleases P/MRP protein subunit POP1 OS=Homo sapiens GN=POP1 PE=1 SV=2	2	5	5	5	0	0	0	0	3	3	0	0	0	0	3	3	0	0	0	0	3	3	7.2	7.2	7.2	114.71	1024	1024;183	0	35.736	0	0	0	0	4.2
sp|Q9NY61|AATF_HUMAN	sp|Q9NY61|AATF_HUMAN	1	7492600	1	1	1	1	1	7492600	1	4	4	4	sp|Q9NY61|AATF_HUMAN Protein AATF OS=Homo sapiens GN=AATF PE=1 SV=1	1	4	4	4	0	0	0	0	3	2	0	0	0	0	3	2	0	0	0	0	3	2	5.4	5.4	5.4	119.18	1081	1081	0	32.295	0	0	0	0	4.1
tr|H0YAF8|H0YAF8_HUMAN;tr|J3KPE3|J3KPE3_HUMAN;tr|H0Y8W2|H0Y8W2_HUMAN;sp|P63244|GBLP_HUMAN;tr|D6RAU2|D6RAU2_HUMAN;tr|D6RFX4|D6RFX4_HUMAN;tr|D6RFZ9|D6RFZ9_HUMAN;tr|D6RHH4|D6RHH4_HUMAN;tr|D6R9Z1|D6R9Z1_HUMAN;tr|H0YAM7|H0YAM7_HUMAN;tr|D6R9L0|D6R9L0_HUMAN;tr|E9PD14|E9PD14_HUMAN;tr|H0Y9P0|H0Y9P0_HUMAN;tr|D6RF23|D6RF23_HUMAN;tr|D6RAC2|D6RAC2_HUMAN;tr|D6REE5|D6REE5_HUMAN	tr|H0YAF8|H0YAF8_HUMAN;tr|J3KPE3|J3KPE3_HUMAN;tr|H0Y8W2|H0Y8W2_HUMAN;sp|P63244|GBLP_HUMAN;tr|D6RAU2|D6RAU2_HUMAN;tr|D6RFX4|D6RFX4_HUMAN;tr|D6RFZ9|D6RFZ9_HUMAN;tr|D6RHH4|D6RHH4_HUMAN;tr|D6R9Z1|D6R9Z1_HUMAN;tr|H0YAM7|H0YAM7_HUMAN;tr|D6R9L0|D6R9L0_HUMAN;tr|E9PD14|E9PD14_HUMAN	1	7458600	1	1	1	1	1	7458600	1	3;3;3;3;2;2;2;2;2;2;2;2;1;1;1;1	3;3;3;3;2;2;2;2;2;2;2;2;1;1;1;1	3;3;3;3;2;2;2;2;2;2;2;2;1;1;1;1	tr|H0YAF8|H0YAF8_HUMAN Guanine nucleotide-binding protein subunit beta-2-like 1 (Fragment) OS=Homo sapiens GN=GNB2L1 PE=1 SV=1;tr|J3KPE3|J3KPE3_HUMAN Guanine nucleotide-binding protein subunit beta-2-like 1 OS=Homo sapiens GN=GNB2L1 PE=1 SV=1;tr|H0Y8W2|H0Y	16	3	3	3	0	0	0	1	3	0	0	0	0	1	3	0	0	0	0	1	3	0	19.7	19.7	19.7	21.934	198	198;273;274;317;147;194;198;233;237;247;300;379;83;101;269;321	0	20.359	0	0	0	8.1	19.7
sp|Q96KR1|ZFR_HUMAN	sp|Q96KR1|ZFR_HUMAN	1	7403700	1	1	1	1	1	7403700	1	6	6	6	sp|Q96KR1|ZFR_HUMAN Zinc finger RNA-binding protein OS=Homo sapiens GN=ZFR PE=1 SV=2	1	6	6	6	0	0	0	0	5	2	0	0	0	0	5	2	0	0	0	0	5	2	12.2	12.2	12.2	117.01	1074	1074	0	36.548	0	0	0	0	9.2
sp|Q9H307|PININ_HUMAN	sp|Q9H307|PININ_HUMAN	1	6570800	1	1	1	1	1	6570800	1	4	4	4	sp|Q9H307|PININ_HUMAN Pinin OS=Homo sapiens GN=PNN PE=1 SV=4	1	4	4	4	1	0	0	1	3	2	1	0	0	1	3	2	1	0	0	1	3	2	7.5	7.5	7.5	81.613	717	717	0	28.67	2.4	0	0	2.4	5.3
tr|K7EIN2|K7EIN2_HUMAN;sp|Q9BRJ7|SDOS_HUMAN;tr|K7ENA3|K7ENA3_HUMAN;tr|A0A0G2JL33|A0A0G2JL33_HUMAN;sp|Q96DE0|NUD16_HUMAN	tr|K7EIN2|K7EIN2_HUMAN;sp|Q9BRJ7|SDOS_HUMAN;tr|K7ENA3|K7ENA3_HUMAN	1	6514700	1	1	1	1	1	6514700	1	5;5;3;2;1	5;5;3;2;1	5;5;3;2;1	tr|K7EIN2|K7EIN2_HUMAN Protein syndesmos (Fragment) OS=Homo sapiens GN=NUDT16L1 PE=1 SV=1;sp|Q9BRJ7|SDOS_HUMAN Protein syndesmos OS=Homo sapiens GN=NUDT16L1 PE=1 SV=1;tr|K7ENA3|K7ENA3_HUMAN Protein syndesmos OS=Homo sapiens GN=NUDT16L1 PE=1 SV=1	5	5	5	5	0	0	0	0	4	2	0	0	0	0	4	2	0	0	0	0	4	2	35.4	35.4	35.4	21.809	198	198;211;171;638;195	0	33.062	0	0	0	0	29.8
sp|Q9BRT6|LLPH_HUMAN	sp|Q9BRT6|LLPH_HUMAN	1	6448200	1	1	1	1	1	6448200	1	3	3	3	sp|Q9BRT6|LLPH_HUMAN Protein LLP homolog OS=Homo sapiens GN=LLPH PE=2 SV=1	1	3	3	3	0	0	0	0	2	2	0	0	0	0	2	2	0	0	0	0	2	2	23.3	23.3	23.3	15.225	129	129	0	20.665	0	0	0	0	23.3
tr|H0Y4R1|H0Y4R1_HUMAN;sp|P12268|IMDH2_HUMAN;tr|E7ETK5|E7ETK5_HUMAN	tr|H0Y4R1|H0Y4R1_HUMAN;sp|P12268|IMDH2_HUMAN	1.04266	6385200	1	6887600	1	1	7181400	6385200	1	7;7;2	7;7;2	7;7;2	tr|H0Y4R1|H0Y4R1_HUMAN Inosine-5-monophosphate dehydrogenase 2 (Fragment) OS=Homo sapiens GN=IMPDH2 PE=1 SV=1;sp|P12268|IMDH2_HUMAN Inosine-5-monophosphate dehydrogenase 2 OS=Homo sapiens GN=IMPDH2 PE=1 SV=2	3	7	7	7	4	0	0	4	3	2	4	0	0	4	3	2	4	0	0	4	3	2	10.6	10.6	10.6	97.643	928	928;514;279	0	46.839	6.4	0	0	4.4	4.7
sp|Q13547|HDAC1_HUMAN;tr|Q5TEE2|Q5TEE2_HUMAN	sp|Q13547|HDAC1_HUMAN;tr|Q5TEE2|Q5TEE2_HUMAN	1	6343100	1	1	1	1	1	6343100	1	8;6	4;2	4;2	sp|Q13547|HDAC1_HUMAN Histone deacetylase 1 OS=Homo sapiens GN=HDAC1 PE=1 SV=1;tr|Q5TEE2|Q5TEE2_HUMAN Histone deacetylase 1 (Fragment) OS=Homo sapiens GN=HDAC1 PE=1 SV=1	2	8	4	4	4	2	3	5	5	2	0	1	1	2	3	0	0	1	1	2	3	0	22.4	13.1	13.1	55.102	482	482;211	0	26.24	9.3	6.4	9.1	12.4	16.4
sp|P52756|RBM5_HUMAN;tr|C9JFQ5|C9JFQ5_HUMAN;tr|C9J9P7|C9J9P7_HUMAN	sp|P52756|RBM5_HUMAN	1.87536	6220100	1	5086000	1	1	9538100	6220100	1	8;2;1	5;2;1	5;2;1	sp|P52756|RBM5_HUMAN RNA-binding protein 5 OS=Homo sapiens GN=RBM5 PE=1 SV=2	3	8	5	5	4	2	1	3	3	2	2	1	1	3	3	2	2	1	1	3	3	2	10.8	7.6	7.6	92.153	815	815;137;120	0	33.11	4.9	2.9	1.5	4.7	5
sp|O75691|UTP20_HUMAN	sp|O75691|UTP20_HUMAN	1	6182700	1	1	1	1	1	6182700	1	7	7	7	sp|O75691|UTP20_HUMAN Small subunit processome component 20 homolog OS=Homo sapiens GN=UTP20 PE=1 SV=3	1	7	7	7	0	0	0	0	4	4	0	0	0	0	4	4	0	0	0	0	4	4	3.4	3.4	3.4	318.38	2785	2785	0	41.793	0	0	0	0	1.6
tr|A0A0A0MR02|A0A0A0MR02_HUMAN;sp|P45880|VDAC2_HUMAN;tr|A2A3S1|A2A3S1_HUMAN;tr|Q5JSD2|Q5JSD2_HUMAN;tr|Q5JSD1|Q5JSD1_HUMAN	tr|A0A0A0MR02|A0A0A0MR02_HUMAN;sp|P45880|VDAC2_HUMAN	1.52646	6040300	1	5024700	1	1	7670000	6040300	1	4;4;1;1;1	4;4;1;1;1	4;4;1;1;1	tr|A0A0A0MR02|A0A0A0MR02_HUMAN Voltage-dependent anion-selective channel protein 2 (Fragment) OS=Homo sapiens GN=VDAC2 PE=1 SV=1;sp|P45880|VDAC2_HUMAN Voltage-dependent anion-selective channel protein 2 OS=Homo sapiens GN=VDAC2 PE=1 SV=2	5	4	4	4	2	1	0	4	2	0	2	1	0	4	2	0	2	1	0	4	2	0	17.7	17.7	17.7	30.348	282	282;294;109;195;204	0	27.177	10.6	7.1	0	17.7	10.6
tr|D6RIY6|D6RIY6_HUMAN;sp|Q06265|EXOS9_HUMAN;tr|H0Y9L5|H0Y9L5_HUMAN;tr|D6R905|D6R905_HUMAN;tr|D6RA17|D6RA17_HUMAN	tr|D6RIY6|D6RIY6_HUMAN;sp|Q06265|EXOS9_HUMAN	1	5989700	1	1	1	1	1	5989700	1	3;3;1;1;1	3;3;1;1;1	3;3;1;1;1	tr|D6RIY6|D6RIY6_HUMAN Exosome complex component RRP45 OS=Homo sapiens GN=EXOSC9 PE=1 SV=1;sp|Q06265|EXOS9_HUMAN Exosome complex component RRP45 OS=Homo sapiens GN=EXOSC9 PE=1 SV=3	5	3	3	3	0	0	0	0	2	2	0	0	0	0	2	2	0	0	0	0	2	2	9.5	9.5	9.5	46.977	423	423;439;172;226;242	0	18.835	0	0	0	0	5
REV__sp|O75764|TCEA3_HUMAN	REV__sp|O75764|TCEA3_HUMAN	1	5903300	1	1	1	1	1	5903300	1	1	1	1	sp|O75764|TCEA3_HUMAN Transcription elongation factor A protein 3 OS=Homo sapiens GN=TCEA3 PE=1 SV=2	1	1	1	1	0	0	0	0	1	0	0	0	0	0	1	0	0	0	0	0	1	0	0	0	0	38.971	348	348	1	-2	0	0	0	0	0
tr|C9JQV0|C9JQV0_HUMAN;sp|Q9BRJ6|CG050_HUMAN	tr|C9JQV0|C9JQV0_HUMAN;sp|Q9BRJ6|CG050_HUMAN	1	5811000	1	1	1	1	1	5811000	1	1;1	1;1	1;1	tr|C9JQV0|C9JQV0_HUMAN Uncharacterized protein C7orf50 (Fragment) OS=Homo sapiens GN=C7orf50 PE=1 SV=1;sp|Q9BRJ6|CG050_HUMAN Uncharacterized protein C7orf50 OS=Homo sapiens GN=C7orf50 PE=1 SV=1	2	1	1	1	0	0	0	0	1	0	0	0	0	0	1	0	0	0	0	0	1	0	10.9	10.9	10.9	21.883	192	192;194	0.0016181	8.5573	0	0	0	0	10.9
tr|A0A0A0MS51|A0A0A0MS51_HUMAN;tr|A0A0A0MT01|A0A0A0MT01_HUMAN;sp|P06396|GELS_HUMAN;tr|Q5T0H9|Q5T0H9_HUMAN;CON__Q3SX14;tr|Q5T0H8|Q5T0H8_HUMAN;tr|Q5T0I1|Q5T0I1_HUMAN;REV__tr|H0YJM7|H0YJM7_HUMAN;REV__tr|F8W8F9|F8W8F9_HUMAN;REV__sp|Q6TDU7|CASC1_HUMAN	tr|A0A0A0MS51|A0A0A0MS51_HUMAN;tr|A0A0A0MT01|A0A0A0MT01_HUMAN;sp|P06396|GELS_HUMAN;tr|Q5T0H9|Q5T0H9_HUMAN;CON__Q3SX14	2.75257	5540900	1	7881000	1	1	21693000	5540900	1	7;7;7;5;5;3;1;1;1;1	7;7;7;5;5;3;1;1;1;1	5;5;5;4;3;3;0;1;1;1	tr|A0A0A0MS51|A0A0A0MS51_HUMAN Gelsolin OS=Homo sapiens GN=GSN PE=1 SV=1;tr|A0A0A0MT01|A0A0A0MT01_HUMAN Gelsolin OS=Homo sapiens GN=GSN PE=1 SV=1;sp|P06396|GELS_HUMAN Gelsolin OS=Homo sapiens GN=GSN PE=1 SV=1;tr|Q5T0H9|Q5T0H9_HUMAN Gelsolin OS=Homo sapiens	10	7	7	5	4	0	0	7	2	0	4	0	0	7	2	0	2	0	0	5	2	0	13.2	13.2	9.4	82.525	748	748;767;782;485;781;207;228;548;722;870	0	51.734	7.9	0	0	13.2	4.7
sp|P49750|YLPM1_HUMAN;tr|H0YIQ2|H0YIQ2_HUMAN;tr|F8VU51|F8VU51_HUMAN;tr|H0YI23|H0YI23_HUMAN	sp|P49750|YLPM1_HUMAN;tr|H0YIQ2|H0YIQ2_HUMAN;tr|F8VU51|F8VU51_HUMAN	1	5471900	1	1	1	1	1	5471900	1	5;4;3;1	5;4;3;1	5;4;3;1	sp|P49750|YLPM1_HUMAN YLP motif-containing protein 1 OS=Homo sapiens GN=YLPM1 PE=1 SV=3;tr|H0YIQ2|H0YIQ2_HUMAN YLP motif-containing protein 1 (Fragment) OS=Homo sapiens GN=YLPM1 PE=1 SV=1;tr|F8VU51|F8VU51_HUMAN YLP motif-containing protein 1 OS=Homo sapien	4	5	5	5	0	0	0	0	4	2	0	0	0	0	4	2	0	0	0	0	4	2	4.7	4.7	4.7	219.98	1951	1951;1595;1440;466	0	30.21	0	0	0	0	4.2
sp|P78332|RBM6_HUMAN;tr|E9PGM9|E9PGM9_HUMAN;tr|F8WCA5|F8WCA5_HUMAN;tr|F8WF63|F8WF63_HUMAN;tr|C9JSL1|C9JSL1_HUMAN	sp|P78332|RBM6_HUMAN;tr|E9PGM9|E9PGM9_HUMAN;tr|F8WCA5|F8WCA5_HUMAN	1	5375600	1	1	1	1	1	5375600	1	9;7;6;2;1	8;6;6;2;1	8;6;6;2;1	sp|P78332|RBM6_HUMAN RNA-binding protein 6 OS=Homo sapiens GN=RBM6 PE=1 SV=5;tr|E9PGM9|E9PGM9_HUMAN RNA-binding protein 6 OS=Homo sapiens GN=RBM6 PE=1 SV=1;tr|F8WCA5|F8WCA5_HUMAN RNA-binding protein 6 OS=Homo sapiens GN=RBM6 PE=1 SV=1	5	9	8	8	5	1	0	3	3	0	4	0	0	3	3	0	4	0	0	3	3	0	9.1	8.5	8.5	128.64	1123	1123;991;697;199;156	0	50.056	4.8	0.6	0	3	4.3
tr|A0A075B7D9|A0A075B7D9_HUMAN;sp|Q92804|RBP56_HUMAN	tr|A0A075B7D9|A0A075B7D9_HUMAN;sp|Q92804|RBP56_HUMAN	1	5345400	1	1	1	1	1	5345400	1	3;3	2;2	2;2	tr|A0A075B7D9|A0A075B7D9_HUMAN TATA-binding protein-associated factor 2N OS=Homo sapiens GN=TAF15 PE=1 SV=1;sp|Q92804|RBP56_HUMAN TATA-binding protein-associated factor 2N OS=Homo sapiens GN=TAF15 PE=1 SV=1	2	3	2	2	0	0	0	2	2	1	0	0	0	1	1	0	0	0	0	1	1	0	12.5	9.4	9.4	48.839	449	449;592	0	47.164	0	0	0	4.9	10.7
sp|Q2TAY7|SMU1_HUMAN	sp|Q2TAY7|SMU1_HUMAN	1	5320500	1	1	1	1	1	5320500	1	4	4	4	sp|Q2TAY7|SMU1_HUMAN WD40 repeat-containing protein SMU1 OS=Homo sapiens GN=SMU1 PE=1 SV=2	1	4	4	4	0	0	0	0	4	1	0	0	0	0	4	1	0	0	0	0	4	1	8.2	8.2	8.2	57.543	513	513	0	27.15	0	0	0	0	8.2
sp|P05141|ADT2_HUMAN;tr|V9GYG0|V9GYG0_HUMAN;sp|P12236|ADT3_HUMAN;sp|P12235|ADT1_HUMAN;sp|Q9H0C2|ADT4_HUMAN	sp|P05141|ADT2_HUMAN;tr|V9GYG0|V9GYG0_HUMAN;sp|P12236|ADT3_HUMAN;sp|P12235|ADT1_HUMAN	1.86934	5290600	1	5023600	1	1	9390800	5290600	1	4;2;2;2;1	4;2;2;2;1	4;2;2;2;1	sp|P05141|ADT2_HUMAN ADP/ATP translocase 2 OS=Homo sapiens GN=SLC25A5 PE=1 SV=7;tr|V9GYG0|V9GYG0_HUMAN ADP/ATP translocase 1 OS=Homo sapiens GN=SLC25A4 PE=1 SV=1;sp|P12236|ADT3_HUMAN ADP/ATP translocase 3 OS=Homo sapiens GN=SLC25A6 PE=1 SV=4;sp|P12235|ADT1	5	4	4	4	4	1	0	2	3	1	4	1	0	2	3	1	4	1	0	2	3	1	15.4	15.4	15.4	32.852	298	298;208;298;298;848	0	26.946	15.4	4.4	0	7.7	11.7
tr|A0A087X0R7|A0A087X0R7_HUMAN;sp|Q9H4L4|SENP3_HUMAN;tr|J3KSF5|J3KSF5_HUMAN;tr|J3QRE4|J3QRE4_HUMAN;tr|A0A087WV50|A0A087WV50_HUMAN;tr|J3QL36|J3QL36_HUMAN	tr|A0A087X0R7|A0A087X0R7_HUMAN;sp|Q9H4L4|SENP3_HUMAN;tr|J3KSF5|J3KSF5_HUMAN;tr|J3QRE4|J3QRE4_HUMAN;tr|A0A087WV50|A0A087WV50_HUMAN;tr|J3QL36|J3QL36_HUMAN	1	5262900	1	1	1	1	1	5262900	1	2;2;1;1;1;1	2;2;1;1;1;1	2;2;1;1;1;1	tr|A0A087X0R7|A0A087X0R7_HUMAN Protein SENP3-EIF4A1 (Fragment) OS=Homo sapiens GN=SENP3-EIF4A1 PE=4 SV=1;sp|Q9H4L4|SENP3_HUMAN Sentrin-specific protease 3 OS=Homo sapiens GN=SENP3 PE=1 SV=2;tr|J3KSF5|J3KSF5_HUMAN Sentrin-specific protease 3 (Fragment) OS=H	6	2	2	2	0	0	0	0	2	1	0	0	0	0	2	1	0	0	0	0	2	1	5.7	5.7	5.7	61.277	540	540;574;82;110;177;237	0	13.757	0	0	0	0	5.7
tr|E9PFF8|E9PFF8_HUMAN;sp|Q6NW34|CC017_HUMAN	tr|E9PFF8|E9PFF8_HUMAN;sp|Q6NW34|CC017_HUMAN	1	5162500	1	1	1	1	1	5162500	1	2;2	2;2	2;2	tr|E9PFF8|E9PFF8_HUMAN Uncharacterized protein C3orf17 OS=Homo sapiens GN=C3orf17 PE=1 SV=1;sp|Q6NW34|CC017_HUMAN Uncharacterized protein C3orf17 OS=Homo sapiens GN=C3orf17 PE=1 SV=3	2	2	2	2	0	0	0	0	2	1	0	0	0	0	2	1	0	0	0	0	2	1	10.1	10.1	10.1	26.879	238	238;567	0	12.606	0	0	0	0	10.1
sp|Q8NEJ9|NGDN_HUMAN;tr|G3V4G1|G3V4G1_HUMAN;tr|H0YJ17|H0YJ17_HUMAN	sp|Q8NEJ9|NGDN_HUMAN	1	5084300	1	1	1	1	1	5084300	1	3;1;1	3;1;1	3;1;1	sp|Q8NEJ9|NGDN_HUMAN Neuroguidin OS=Homo sapiens GN=NGDN PE=1 SV=1	3	3	3	3	0	0	0	0	3	1	0	0	0	0	3	1	0	0	0	0	3	1	15.6	15.6	15.6	35.894	315	315;142;263	0	35.891	0	0	0	0	15.6
sp|P05455|LA_HUMAN;tr|E9PGX9|E9PGX9_HUMAN;tr|E9PFL9|E9PFL9_HUMAN;tr|E7ERC4|E7ERC4_HUMAN	sp|P05455|LA_HUMAN;tr|E9PGX9|E9PGX9_HUMAN;tr|E9PFL9|E9PFL9_HUMAN;tr|E7ERC4|E7ERC4_HUMAN	1	4915600	1	1	1	1	1	4915600	1	2;1;1;1	2;1;1;1	2;1;1;1	sp|P05455|LA_HUMAN Lupus La protein OS=Homo sapiens GN=SSB PE=1 SV=2;tr|E9PGX9|E9PGX9_HUMAN Lupus La protein (Fragment) OS=Homo sapiens GN=SSB PE=1 SV=1;tr|E9PFL9|E9PFL9_HUMAN Lupus La protein OS=Homo sapiens GN=SSB PE=1 SV=1;tr|E7ERC4|E7ERC4_HUMAN Lupus L	4	2	2	2	0	0	0	0	2	0	0	0	0	0	2	0	0	0	0	0	2	0	7.6	7.6	7.6	46.836	408	408;120;134;184	0	12.725	0	0	0	0	7.6
tr|X6RFN3|X6RFN3_HUMAN;sp|Q99496|RING2_HUMAN;sp|Q06587|RING1_HUMAN	tr|X6RFN3|X6RFN3_HUMAN;sp|Q99496|RING2_HUMAN;sp|Q06587|RING1_HUMAN	1	4859500	1	1	1	1	1	4859500	1	1;1;1	1;1;1	1;1;1	tr|X6RFN3|X6RFN3_HUMAN E3 ubiquitin-protein ligase RING2 (Fragment) OS=Homo sapiens GN=RNF2 PE=1 SV=2;sp|Q99496|RING2_HUMAN E3 ubiquitin-protein ligase RING2 OS=Homo sapiens GN=RNF2 PE=1 SV=1;sp|Q06587|RING1_HUMAN E3 ubiquitin-protein ligase RING1 OS=Homo	3	1	1	1	1	0	0	1	1	0	1	0	0	1	1	0	1	0	0	1	1	0	5.7	5.7	5.7	27.277	245	245;336;406	0.0015244	7.0511	5.7	0	0	5.7	5.7
tr|M0R050|M0R050_HUMAN;sp|Q9NQT4|EXOS5_HUMAN	tr|M0R050|M0R050_HUMAN;sp|Q9NQT4|EXOS5_HUMAN	1	4770500	1	1	1	1	1	4770500	1	1;1	1;1	1;1	tr|M0R050|M0R050_HUMAN Exosome complex component RRP46 OS=Homo sapiens GN=EXOSC5 PE=1 SV=1;sp|Q9NQT4|EXOS5_HUMAN Exosome complex component RRP46 OS=Homo sapiens GN=EXOSC5 PE=1 SV=1	2	1	1	1	0	0	0	0	1	0	0	0	0	0	1	0	0	0	0	0	1	0	6.1	6.1	6.1	21.256	197	197;235	0.0015456	7.1772	0	0	0	0	6.1
sp|Q49A26|GLYR1_HUMAN;tr|K7EMM8|K7EMM8_HUMAN;tr|K7EQB2|K7EQB2_HUMAN	sp|Q49A26|GLYR1_HUMAN;tr|K7EMM8|K7EMM8_HUMAN;tr|K7EQB2|K7EQB2_HUMAN	1	4733500	1	1	1	1	1	4733500	1	2;2;1	2;2;1	2;2;1	sp|Q49A26|GLYR1_HUMAN Putative oxidoreductase GLYR1 OS=Homo sapiens GN=GLYR1 PE=1 SV=3;tr|K7EMM8|K7EMM8_HUMAN Putative oxidoreductase GLYR1 (Fragment) OS=Homo sapiens GN=GLYR1 PE=1 SV=2;tr|K7EQB2|K7EQB2_HUMAN Putative oxidoreductase GLYR1 (Fragment) OS=Hom	3	2	2	2	0	0	0	0	2	1	0	0	0	0	2	1	0	0	0	0	2	1	5.1	5.1	5.1	60.556	553	553;524;186	0	12.149	0	0	0	0	5.1
sp|Q86V81|THOC4_HUMAN;tr|E9PB61|E9PB61_HUMAN	sp|Q86V81|THOC4_HUMAN;tr|E9PB61|E9PB61_HUMAN	1	4726000	1	1	1	1	1	4726000	1	2;2	2;2	2;2	sp|Q86V81|THOC4_HUMAN THO complex subunit 4 OS=Homo sapiens GN=ALYREF PE=1 SV=3;tr|E9PB61|E9PB61_HUMAN THO complex subunit 4 OS=Homo sapiens GN=ALYREF PE=1 SV=1	2	2	2	2	1	0	0	1	2	1	1	0	0	1	2	1	1	0	0	1	2	1	11.3	11.3	11.3	26.888	257	257;264	0	13.679	4.3	0	0	4.3	11.3
sp|P08579|RU2B_HUMAN	sp|P08579|RU2B_HUMAN	1	4690600	1	1	1	1	1	4690600	1	5	3	3	sp|P08579|RU2B_HUMAN U2 small nuclear ribonucleoprotein B OS=Homo sapiens GN=SNRPB2 PE=1 SV=1	1	5	3	3	3	1	0	2	3	1	1	0	0	0	2	1	1	0	0	0	2	1	26.7	20	20	25.486	225	225	0	19.063	14.7	3.6	0	6.7	15.6
sp|Q8WXF1|PSPC1_HUMAN;tr|X6RDA4|X6RDA4_HUMAN	sp|Q8WXF1|PSPC1_HUMAN;tr|X6RDA4|X6RDA4_HUMAN	1	4650700	1	1	1	1	1	4650700	1	4;3	4;3	4;3	sp|Q8WXF1|PSPC1_HUMAN Paraspeckle component 1 OS=Homo sapiens GN=PSPC1 PE=1 SV=1;tr|X6RDA4|X6RDA4_HUMAN Paraspeckle component 1 (Fragment) OS=Homo sapiens GN=PSPC1 PE=1 SV=1	2	4	4	4	0	0	0	2	2	2	0	0	0	2	2	2	0	0	0	2	2	2	10.3	10.3	10.3	58.743	523	523;248	0	26.51	0	0	0	4.8	5.9
sp|Q7KZF4|SND1_HUMAN;tr|H7C597|H7C597_HUMAN	sp|Q7KZF4|SND1_HUMAN;tr|H7C597|H7C597_HUMAN	1	4434200	1	1	1	1	1	4434200	1	3;2	3;2	3;2	sp|Q7KZF4|SND1_HUMAN Staphylococcal nuclease domain-containing protein 1 OS=Homo sapiens GN=SND1 PE=1 SV=1;tr|H7C597|H7C597_HUMAN Staphylococcal nuclease domain-containing protein 1 (Fragment) OS=Homo sapiens GN=SND1 PE=1 SV=1	2	3	3	3	0	0	0	0	3	1	0	0	0	0	3	1	0	0	0	0	3	1	1.6	1.6	1.6	264.16	2426	2426;231	0	17.514	0	0	0	0	1.6
sp|Q9H6S0|YTDC2_HUMAN;tr|D6RA70|D6RA70_HUMAN	sp|Q9H6S0|YTDC2_HUMAN	1	4247200	1	1	1	1	1	4247200	1	3;1	3;1	3;1	sp|Q9H6S0|YTDC2_HUMAN Probable ATP-dependent RNA helicase YTHDC2 OS=Homo sapiens GN=YTHDC2 PE=1 SV=2	2	3	3	3	0	0	0	0	3	1	0	0	0	0	3	1	0	0	0	0	3	1	2.8	2.8	2.8	160.25	1430	1430;739	0	22.681	0	0	0	0	2.8
sp|P09234|RU1C_HUMAN;tr|A0A0A0MRR7|A0A0A0MRR7_HUMAN	sp|P09234|RU1C_HUMAN;tr|A0A0A0MRR7|A0A0A0MRR7_HUMAN	1	4242200	1	1	1	1	1	4242200	1	2;2	2;2	2;2	sp|P09234|RU1C_HUMAN U1 small nuclear ribonucleoprotein C OS=Homo sapiens GN=SNRPC PE=1 SV=1;tr|A0A0A0MRR7|A0A0A0MRR7_HUMAN U1 small nuclear ribonucleoprotein C OS=Homo sapiens GN=SNRPC PE=1 SV=1	2	2	2	2	0	0	0	0	2	2	0	0	0	0	2	2	0	0	0	0	2	2	18.9	18.9	18.9	17.394	159	159;435	0	15.642	0	0	0	0	18.9
sp|Q8IWX8|CHERP_HUMAN;tr|J3QK89|J3QK89_HUMAN	sp|Q8IWX8|CHERP_HUMAN;tr|J3QK89|J3QK89_HUMAN	1	4107500	1	1	1	1	1	4107500	1	3;3	3;3	3;3	sp|Q8IWX8|CHERP_HUMAN Calcium homeostasis endoplasmic reticulum protein OS=Homo sapiens GN=CHERP PE=1 SV=3;tr|J3QK89|J3QK89_HUMAN Calcium homeostasis endoplasmic reticulum protein OS=Homo sapiens GN=CHERP PE=1 SV=1	2	3	3	3	1	0	0	1	3	2	1	0	0	1	3	2	1	0	0	1	3	2	4.7	4.7	4.7	103.7	916	916;927	0	21.247	1.2	0	0	1.2	4.7
tr|J3KNN5|J3KNN5_HUMAN;sp|Q9UJV9|DDX41_HUMAN;tr|H0Y8L8|H0Y8L8_HUMAN	tr|J3KNN5|J3KNN5_HUMAN;sp|Q9UJV9|DDX41_HUMAN	1	3939300	1	1	1	1	1	3939300	1	4;4;1	4;4;1	4;4;1	tr|J3KNN5|J3KNN5_HUMAN Probable ATP-dependent RNA helicase DDX41 (Fragment) OS=Homo sapiens GN=DDX41 PE=1 SV=1;sp|Q9UJV9|DDX41_HUMAN Probable ATP-dependent RNA helicase DDX41 OS=Homo sapiens GN=DDX41 PE=1 SV=2	3	4	4	4	0	0	0	0	3	1	0	0	0	0	3	1	0	0	0	0	3	1	8.6	8.6	8.6	71.648	640	640;622;173	0	24.449	0	0	0	0	6.9
sp|Q86YP4|P66A_HUMAN	sp|Q86YP4|P66A_HUMAN	1	3887100	1	1	1	1	1	3887100	1	3	3	2	sp|Q86YP4|P66A_HUMAN Transcriptional repressor p66-alpha OS=Homo sapiens GN=GATAD2A PE=1 SV=1	1	3	3	2	1	0	0	0	2	0	1	0	0	0	2	0	0	0	0	0	2	0	8.4	8.4	6.6	68.062	633	633	0	19.969	1.7	0	0	0	6.6
sp|Q06787|FMR1_HUMAN;tr|G8JLE9|G8JLE9_HUMAN;tr|A8MQB8|A8MQB8_HUMAN;tr|A0A0G2JM53|A0A0G2JM53_HUMAN;tr|A0A087WXI3|A0A087WXI3_HUMAN;tr|R9WNI0|R9WNI0_HUMAN;tr|A0A087WY29|A0A087WY29_HUMAN;tr|Q8IXW7|Q8IXW7_HUMAN;tr|A0A087WWR6|A0A087WWR6_HUMAN	sp|Q06787|FMR1_HUMAN;tr|G8JLE9|G8JLE9_HUMAN;tr|A8MQB8|A8MQB8_HUMAN;tr|A0A0G2JM53|A0A0G2JM53_HUMAN;tr|A0A087WXI3|A0A087WXI3_HUMAN;tr|R9WNI0|R9WNI0_HUMAN;tr|A0A087WY29|A0A087WY29_HUMAN;tr|Q8IXW7|Q8IXW7_HUMAN	1	3827100	1	1	1	1	1	3827100	1	6;5;5;5;4;4;3;3;2	4;4;3;3;3;2;2;2;1	4;4;3;3;3;2;2;2;1	sp|Q06787|FMR1_HUMAN Fragile X mental retardation protein 1 OS=Homo sapiens GN=FMR1 PE=1 SV=1;tr|G8JLE9|G8JLE9_HUMAN Fragile X mental retardation protein 1 OS=Homo sapiens GN=FMR1 PE=1 SV=1;tr|A8MQB8|A8MQB8_HUMAN Fragile X mental retardation protein 1 OS=H	9	6	4	4	0	0	0	0	4	4	0	0	0	0	3	2	0	0	0	0	3	2	7.4	5	5	125.08	1118	1118;537;582;1031;419;544;252;573;102	0	24.683	0	0	0	0	4.9
sp|Q15404|RSU1_HUMAN;tr|G3V238|G3V238_HUMAN;tr|M0QXW6|M0QXW6_HUMAN;tr|H0Y6Z9|H0Y6Z9_HUMAN;tr|A0A5A5|A0A5A5_HUMAN;tr|A0A0G2JN40|A0A0G2JN40_HUMAN	sp|Q15404|RSU1_HUMAN;tr|G3V238|G3V238_HUMAN	1	3784500	1	1	1	1	1	3784500	1	4;2;1;1;1;1	4;2;1;1;1;1	4;2;1;1;1;1	sp|Q15404|RSU1_HUMAN Ras suppressor protein 1 OS=Homo sapiens GN=RSU1 PE=1 SV=3;tr|G3V238|G3V238_HUMAN Protein-lysine N-methyltransferase METTL10 OS=Homo sapiens GN=METTL10 PE=1 SV=1	6	4	4	4	0	0	0	0	3	2	0	0	0	0	3	2	0	0	0	0	3	2	0.5	0.5	0.5	1152.2	10694	10694;554;265;578;635;1134	0	24.396	0	0	0	0	0.4
sp|Q14683|SMC1A_HUMAN;tr|G8JLG1|G8JLG1_HUMAN;tr|V9GYN9|V9GYN9_HUMAN;tr|H0Y7K8|H0Y7K8_HUMAN;tr|V9GY57|V9GY57_HUMAN	sp|Q14683|SMC1A_HUMAN;tr|G8JLG1|G8JLG1_HUMAN	1	3612100	1	1	1	1	1	3612100	1	5;4;1;1;1	5;4;1;1;1	5;4;1;1;1	sp|Q14683|SMC1A_HUMAN Structural maintenance of chromosomes protein 1A OS=Homo sapiens GN=SMC1A PE=1 SV=2;tr|G8JLG1|G8JLG1_HUMAN Structural maintenance of chromosomes protein OS=Homo sapiens GN=SMC1A PE=1 SV=2	5	5	5	5	1	0	0	0	3	3	1	0	0	0	3	3	1	0	0	0	3	3	5.5	5.5	5.5	143.23	1233	1233;1211;54;262;279	0	30.096	1.1	0	0	0	3.8
tr|B1AN99|B1AN99_HUMAN;sp|P35030|TRY3_HUMAN	tr|B1AN99|B1AN99_HUMAN;sp|P35030|TRY3_HUMAN	1	3603600	1	1	1	1	1	3603600	1	1;1	1;1	1;1	tr|B1AN99|B1AN99_HUMAN Trypsin-3 (Fragment) OS=Homo sapiens GN=PRSS3 PE=1 SV=5;sp|P35030|TRY3_HUMAN Trypsin-3 OS=Homo sapiens GN=PRSS3 PE=1 SV=2	2	1	1	1	1	0	0	1	1	0	1	0	0	1	1	0	1	0	0	1	1	0	7.3	7.3	7.3	19.401	178	178;304	0	19.46	7.3	0	0	7.3	7.3
tr|M0QZC5|M0QZC5_HUMAN;sp|P62280|RS11_HUMAN;tr|M0R1H5|M0R1H5_HUMAN	tr|M0QZC5|M0QZC5_HUMAN;sp|P62280|RS11_HUMAN	1	3596200	1	1	1	1	1	3596200	1	3;3;1	3;3;1	3;3;1	tr|M0QZC5|M0QZC5_HUMAN 40S ribosomal protein S11 OS=Homo sapiens GN=RPS11 PE=1 SV=1;sp|P62280|RS11_HUMAN 40S ribosomal protein S11 OS=Homo sapiens GN=RPS11 PE=1 SV=3	3	3	3	3	0	0	0	0	2	1	0	0	0	0	2	1	0	0	0	0	2	1	9.3	9.3	9.3	30.559	281	281;158;79	0	18.491	0	0	0	0	6.4
REV__sp|Q15506|SP17_HUMAN	REV__sp|Q15506|SP17_HUMAN	1	3469100	1	1	1	1	1	3469100	1	1	1	1	sp|Q15506|SP17_HUMAN Sperm surface protein Sp17 OS=Homo sapiens GN=SPA17 PE=1 SV=1	1	1	1	1	0	0	1	0	1	0	0	0	1	0	1	0	0	0	1	0	1	0	0	0	0	17.406	151	151	0.0043988	6.6605	0	0	0	0	0
sp|P37108|SRP14_HUMAN;tr|H0YLA2|H0YLA2_HUMAN	sp|P37108|SRP14_HUMAN;tr|H0YLA2|H0YLA2_HUMAN	1	3391400	1	1	1	1	1	3391400	1	2;1	2;1	2;1	sp|P37108|SRP14_HUMAN Signal recognition particle 14 kDa protein OS=Homo sapiens GN=SRP14 PE=1 SV=2;tr|H0YLA2|H0YLA2_HUMAN Signal recognition particle 14 kDa protein OS=Homo sapiens GN=SRP14 PE=1 SV=1	2	2	2	2	0	0	0	0	2	1	0	0	0	0	2	1	0	0	0	0	2	1	17.6	17.6	17.6	14.57	136	136;115	0	19.661	0	0	0	0	17.6
tr|U3KQC1|U3KQC1_HUMAN;tr|A0A0A0MQU0|A0A0A0MQU0_HUMAN;sp|Q9BV38|WDR18_HUMAN	tr|U3KQC1|U3KQC1_HUMAN;tr|A0A0A0MQU0|A0A0A0MQU0_HUMAN;sp|Q9BV38|WDR18_HUMAN	1	3351500	1	1	1	1	1	3351500	1	1;1;1	1;1;1	1;1;1	tr|U3KQC1|U3KQC1_HUMAN WD repeat-containing protein 18 (Fragment) OS=Homo sapiens GN=WDR18 PE=1 SV=1;tr|A0A0A0MQU0|A0A0A0MQU0_HUMAN WD repeat-containing protein 18 (Fragment) OS=Homo sapiens GN=WDR18 PE=1 SV=1;sp|Q9BV38|WDR18_HUMAN WD repeat-containing pro	3	1	1	1	0	0	0	0	1	0	0	0	0	0	1	0	0	0	0	0	1	0	3.8	3.8	3.8	43.237	394	394;429;432	0.0015848	7.7827	0	0	0	0	3.8
sp|Q8N726|ARF_HUMAN;tr|A0A0A0MRI0|A0A0A0MRI0_HUMAN	sp|Q8N726|ARF_HUMAN;tr|A0A0A0MRI0|A0A0A0MRI0_HUMAN	1	3347600	1	1	1	1	1	3347600	1	1;1	1;1	1;1	sp|Q8N726|ARF_HUMAN Tumor suppressor ARF OS=Homo sapiens GN=CDKN2A PE=1 SV=2;tr|A0A0A0MRI0|A0A0A0MRI0_HUMAN Cyclin-dependent kinase inhibitor 2A OS=Homo sapiens GN=CDKN2A PE=1 SV=1	2	1	1	1	0	0	0	0	1	0	0	0	0	0	1	0	0	0	0	0	1	0	6.1	6.1	6.1	13.903	132	132;170	0.0057637	6.5607	0	0	0	0	6.1
sp|P14373|TRI27_HUMAN;tr|H0Y551|H0Y551_HUMAN	sp|P14373|TRI27_HUMAN;tr|H0Y551|H0Y551_HUMAN	1	3337900	1	1	1	1	1	3337900	1	2;1	2;1	2;1	sp|P14373|TRI27_HUMAN Zinc finger protein RFP OS=Homo sapiens GN=TRIM27 PE=1 SV=1;tr|H0Y551|H0Y551_HUMAN Zinc finger protein RFP (Fragment) OS=Homo sapiens GN=TRIM27 PE=1 SV=1	2	2	2	2	0	0	0	0	2	1	0	0	0	0	2	1	0	0	0	0	2	1	5.1	5.1	5.1	58.489	513	513;248	0	15.664	0	0	0	0	5.1
sp|Q14146|URB2_HUMAN;tr|Q5VYD0|Q5VYD0_HUMAN	sp|Q14146|URB2_HUMAN	1	3096600	1	1	1	1	1	3096600	1	3;1	3;1	3;1	sp|Q14146|URB2_HUMAN Unhealthy ribosome biogenesis protein 2 homolog OS=Homo sapiens GN=URB2 PE=2 SV=2	2	3	3	3	0	0	0	0	2	2	0	0	0	0	2	2	0	0	0	0	2	2	2.7	2.7	2.7	170.54	1524	1524;84	0	17.614	0	0	0	0	2
sp|Q9BQI3|E2AK1_HUMAN	sp|Q9BQI3|E2AK1_HUMAN	1	3053400	1	1	1	1	1	3053400	1	2	2	2	sp|Q9BQI3|E2AK1_HUMAN Eukaryotic translation initiation factor 2-alpha kinase 1 OS=Homo sapiens GN=EIF2AK1 PE=1 SV=2	1	2	2	2	0	0	0	0	2	0	0	0	0	0	2	0	0	0	0	0	2	0	1.9	1.9	1.9	144.04	1297	1297	0	12.343	0	0	0	0	1.9
tr|B1AMU3|B1AMU3_HUMAN;sp|Q9Y3B2|EXOS1_HUMAN;tr|R4GNH9|R4GNH9_HUMAN;tr|R4GMQ7|R4GMQ7_HUMAN;tr|B1AMU7|B1AMU7_HUMAN;tr|B1AMU4|B1AMU4_HUMAN	tr|B1AMU3|B1AMU3_HUMAN;sp|Q9Y3B2|EXOS1_HUMAN;tr|R4GNH9|R4GNH9_HUMAN;tr|R4GMQ7|R4GMQ7_HUMAN;tr|B1AMU7|B1AMU7_HUMAN;tr|B1AMU4|B1AMU4_HUMAN	1	3021500	1	1	1	1	1	3021500	1	2;2;1;1;1;1	2;2;1;1;1;1	2;2;1;1;1;1	tr|B1AMU3|B1AMU3_HUMAN Exosome complex component CSL4 OS=Homo sapiens GN=EXOSC1 PE=1 SV=1;sp|Q9Y3B2|EXOS1_HUMAN Exosome complex component CSL4 OS=Homo sapiens GN=EXOSC1 PE=1 SV=1;tr|R4GNH9|R4GNH9_HUMAN Exosome complex component CSL4 OS=Homo sapiens GN=EXOS	6	2	2	2	0	0	0	0	2	1	0	0	0	0	2	1	0	0	0	0	2	1	13.5	13.5	13.5	18.816	170	170;195;139;143;165;178	0	12.024	0	0	0	0	13.5
sp|Q9UKN8|TF3C4_HUMAN;tr|F2Z356|F2Z356_HUMAN	sp|Q9UKN8|TF3C4_HUMAN	1	2979500	1	1	1	1	1	2979500	1	3;1	3;1	3;1	sp|Q9UKN8|TF3C4_HUMAN General transcription factor 3C polypeptide 4 OS=Homo sapiens GN=GTF3C4 PE=1 SV=2	2	3	3	3	0	0	0	0	2	2	0	0	0	0	2	2	0	0	0	0	2	2	4.7	4.7	4.7	91.981	822	822;328	0	19.009	0	0	0	0	3.6
sp|Q8WUD4|CCD12_HUMAN;tr|G3V3A0|G3V3A0_HUMAN	sp|Q8WUD4|CCD12_HUMAN;tr|G3V3A0|G3V3A0_HUMAN	1	2921400	1	1	1	1	1	2921400	1	1;1	1;1	1;1	sp|Q8WUD4|CCD12_HUMAN Coiled-coil domain-containing protein 12 OS=Homo sapiens GN=CCDC12 PE=1 SV=1;tr|G3V3A0|G3V3A0_HUMAN Alpha-1-antichymotrypsin OS=Homo sapiens GN=SERPINA3 PE=1 SV=1	2	1	1	1	0	0	0	0	1	0	0	0	0	0	1	0	0	0	0	0	1	0	15.1	15.1	15.1	19.181	166	166;482	0.0015504	7.2579	0	0	0	0	15.1
sp|O60287|NPA1P_HUMAN	sp|O60287|NPA1P_HUMAN	1	2883300	1	1	1	1	1	2883300	1	6	6	6	sp|O60287|NPA1P_HUMAN Nucleolar pre-ribosomal-associated protein 1 OS=Homo sapiens GN=URB1 PE=1 SV=4	1	6	6	6	0	0	0	0	3	3	0	0	0	0	3	3	0	0	0	0	3	3	3.2	3.2	3.2	254.39	2271	2271	0	38.309	0	0	0	0	1.9
sp|P62306|RUXF_HUMAN;tr|A0A0B4J254|A0A0B4J254_HUMAN;tr|F8W0W6|F8W0W6_HUMAN	sp|P62306|RUXF_HUMAN;tr|A0A0B4J254|A0A0B4J254_HUMAN;tr|F8W0W6|F8W0W6_HUMAN	1	2748900	1	1	1	1	1	2748900	1	2;1;1	2;1;1	2;1;1	sp|P62306|RUXF_HUMAN Small nuclear ribonucleoprotein F OS=Homo sapiens GN=SNRPF PE=1 SV=1;tr|A0A0B4J254|A0A0B4J254_HUMAN Small nuclear ribonucleoprotein F OS=Homo sapiens GN=SNRPF PE=1 SV=1;tr|F8W0W6|F8W0W6_HUMAN Small nuclear ribonucleoprotein F OS=Homo s	3	2	2	2	0	0	0	0	2	0	0	0	0	0	2	0	0	0	0	0	2	0	39.5	39.5	39.5	9.7251	86	86;67;127	0	15.504	0	0	0	0	39.5
sp|Q9H2P0|ADNP_HUMAN;tr|E9PQK8|E9PQK8_HUMAN	sp|Q9H2P0|ADNP_HUMAN;tr|E9PQK8|E9PQK8_HUMAN	1	2747700	1	1	1	1	1	2747700	1	2;1	2;1	2;1	sp|Q9H2P0|ADNP_HUMAN Activity-dependent neuroprotector homeobox protein OS=Homo sapiens GN=ADNP PE=1 SV=1;tr|E9PQK8|E9PQK8_HUMAN Activity-dependent neuroprotector homeobox protein (Fragment) OS=Homo sapiens GN=ADNP PE=1 SV=5	2	2	2	2	0	0	0	0	2	0	0	0	0	0	2	0	0	0	0	0	2	0	3.4	3.4	3.4	123.56	1102	1102;173	0	12.347	0	0	0	0	3.4
sp|Q9UQE7|SMC3_HUMAN	sp|Q9UQE7|SMC3_HUMAN	1	2722000	1	1	1	1	1	2722000	1	5	5	5	sp|Q9UQE7|SMC3_HUMAN Structural maintenance of chromosomes protein 3 OS=Homo sapiens GN=SMC3 PE=1 SV=2	1	5	5	5	1	0	0	0	3	3	1	0	0	0	3	3	1	0	0	0	3	3	5.5	5.5	5.5	141.54	1217	1217	0	33.614	1.2	0	0	0	3.4
tr|J3QR07|J3QR07_HUMAN;sp|Q96MU7|YTDC1_HUMAN;tr|J3KRG5|J3KRG5_HUMAN	tr|J3QR07|J3QR07_HUMAN;sp|Q96MU7|YTDC1_HUMAN;tr|J3KRG5|J3KRG5_HUMAN	1	2682400	1	1	1	1	1	2682400	1	2;2;1	2;2;1	2;2;1	tr|J3QR07|J3QR07_HUMAN YTH domain-containing protein 1 OS=Homo sapiens GN=YTHDC1 PE=1 SV=1;sp|Q96MU7|YTDC1_HUMAN YTH domain-containing protein 1 OS=Homo sapiens GN=YTHDC1 PE=1 SV=3;tr|J3KRG5|J3KRG5_HUMAN YTH domain-containing protein 1 (Fragment) OS=Homo s	3	2	2	2	0	0	0	0	2	0	0	0	0	0	2	0	0	0	0	0	2	0	3.3	3.3	3.3	85.586	735	735;727;93	0	13.42	0	0	0	0	3.3
tr|B0QYK0|B0QYK0_HUMAN;sp|Q01844|EWS_HUMAN;tr|F8WC90|F8WC90_HUMAN;tr|H7BY36|H7BY36_HUMAN;tr|A0A0D9SFL3|A0A0D9SFL3_HUMAN;tr|C9JGE3|C9JGE3_HUMAN	tr|B0QYK0|B0QYK0_HUMAN;sp|Q01844|EWS_HUMAN;tr|F8WC90|F8WC90_HUMAN;tr|H7BY36|H7BY36_HUMAN;tr|A0A0D9SFL3|A0A0D9SFL3_HUMAN;tr|C9JGE3|C9JGE3_HUMAN	1	2623700	1	1	1	1	1	2623700	1	2;2;1;1;1;1	2;2;1;1;1;1	2;2;1;1;1;1	tr|B0QYK0|B0QYK0_HUMAN RNA-binding protein EWS OS=Homo sapiens GN=EWSR1 PE=1 SV=1;sp|Q01844|EWS_HUMAN RNA-binding protein EWS OS=Homo sapiens GN=EWSR1 PE=1 SV=1;tr|F8WC90|F8WC90_HUMAN RNA-binding protein EWS (Fragment) OS=Homo sapiens GN=EWSR1 PE=1 SV=5;tr	6	2	2	2	0	0	0	0	2	1	0	0	0	0	2	1	0	0	0	0	2	1	6.3	6.3	6.3	64.929	618	618;656;293;464;584;620	0	14.501	0	0	0	0	6.3
sp|O95400|CD2B2_HUMAN	sp|O95400|CD2B2_HUMAN	1	2622000	1	1	1	1	1	2622000	1	3	3	3	sp|O95400|CD2B2_HUMAN CD2 antigen cytoplasmic tail-binding protein 2 OS=Homo sapiens GN=CD2BP2 PE=1 SV=1	1	3	3	3	1	0	0	0	2	0	1	0	0	0	2	0	1	0	0	0	2	0	13.2	13.2	13.2	37.646	341	341	0	18.323	4.1	0	0	0	9.1
sp|Q9UN81|LORF1_HUMAN	sp|Q9UN81|LORF1_HUMAN	1	2595700	1	1	1	1	1	2595700	1	2	2	2	sp|Q9UN81|LORF1_HUMAN LINE-1 retrotransposable element ORF1 protein OS=Homo sapiens GN=L1RE1 PE=1 SV=1	1	2	2	2	0	0	0	0	2	0	0	0	0	0	2	0	0	0	0	0	2	0	6.8	6.8	6.8	40.055	338	338	0	13.868	0	0	0	0	6.8
sp|P68371|TBB4B_HUMAN;sp|P04350|TBB4A_HUMAN;sp|Q3ZCM7|TBB8_HUMAN;tr|M0R0X0|M0R0X0_HUMAN;tr|M0QY85|M0QY85_HUMAN;tr|M0QY37|M0QY37_HUMAN;tr|M0QX14|M0QX14_HUMAN;tr|A0A075B724|A0A075B724_HUMAN;tr|M0QZL7|M0QZL7_HUMAN;tr|M0R278|M0R278_HUMAN	sp|P68371|TBB4B_HUMAN;sp|P04350|TBB4A_HUMAN	1	2450900	1	1	1	1	1	2450900	1	11;8;5;1;1;1;1;1;1;1	2;1;1;1;1;1;1;1;1;1	2;1;1;1;1;1;1;1;1;1	sp|P68371|TBB4B_HUMAN Tubulin beta-4B chain OS=Homo sapiens GN=TUBB4B PE=1 SV=1;sp|P04350|TBB4A_HUMAN Tubulin beta-4A chain OS=Homo sapiens GN=TUBB4A PE=1 SV=2	10	11	2	2	3	2	0	1	9	10	0	0	0	0	2	1	0	0	0	0	2	1	26.3	6.1	6.1	49.83	445	445;444;444;103;107;109;110;119;158;167	0	13.732	7.2	5.4	0	2.2	21.3
tr|H3BV80|H3BV80_HUMAN;tr|H3BMS0|H3BMS0_HUMAN;tr|H3BMM9|H3BMM9_HUMAN;tr|H3BTC0|H3BTC0_HUMAN;sp|Q15287|RNPS1_HUMAN;tr|Q5TEE8|Q5TEE8_HUMAN	tr|H3BV80|H3BV80_HUMAN;tr|H3BMS0|H3BMS0_HUMAN;tr|H3BMM9|H3BMM9_HUMAN;tr|H3BTC0|H3BTC0_HUMAN;sp|Q15287|RNPS1_HUMAN;tr|Q5TEE8|Q5TEE8_HUMAN	1	2385600	1	1	1	1	1	2385600	1	2;2;2;2;2;1	2;2;2;2;2;1	2;2;2;2;2;1	tr|H3BV80|H3BV80_HUMAN RNA-binding protein with serine-rich domain 1 OS=Homo sapiens GN=RNPS1 PE=1 SV=2;tr|H3BMS0|H3BMS0_HUMAN RNA-binding protein with serine-rich domain 1 OS=Homo sapiens GN=RNPS1 PE=1 SV=1;tr|H3BMM9|H3BMM9_HUMAN RNA-binding protein with	6	2	2	2	0	0	0	1	2	1	0	0	0	1	2	1	0	0	0	1	2	1	12.8	12.8	12.8	24.561	211	211;257;284;302;305;392	0	14.45	0	0	0	7.1	12.8
tr|A2A2V2|A2A2V2_HUMAN;sp|P42696|RBM34_HUMAN;tr|H7C5M1|H7C5M1_HUMAN;tr|Q5TCT4|Q5TCT4_HUMAN	tr|A2A2V2|A2A2V2_HUMAN;sp|P42696|RBM34_HUMAN	1	2364900	1	1	1	1	1	2364900	1	3;3;1;1	3;3;1;1	3;3;1;1	tr|A2A2V2|A2A2V2_HUMAN RNA-binding protein 34 (Fragment) OS=Homo sapiens GN=RBM34 PE=1 SV=1;sp|P42696|RBM34_HUMAN RNA-binding protein 34 OS=Homo sapiens GN=RBM34 PE=1 SV=2	4	3	3	3	0	0	0	0	2	1	0	0	0	0	2	1	0	0	0	0	2	1	6.9	6.9	6.9	45.917	408	408;430;86;211	0	16.569	0	0	0	0	4.9
sp|Q9H6Y2|WDR55_HUMAN	sp|Q9H6Y2|WDR55_HUMAN	1	2348500	1	1	1	1	1	2348500	1	1	1	1	sp|Q9H6Y2|WDR55_HUMAN WD repeat-containing protein 55 OS=Homo sapiens GN=WDR55 PE=1 SV=2	1	1	1	1	0	0	0	0	1	0	0	0	0	0	1	0	0	0	0	0	1	0	3.7	3.7	3.7	42.07	383	383	0.0029326	6.6767	0	0	0	0	3.7
tr|F1T0B3|F1T0B3_HUMAN;tr|A0A087X2G1|A0A087X2G1_HUMAN;sp|Q92499|DDX1_HUMAN	tr|F1T0B3|F1T0B3_HUMAN;tr|A0A087X2G1|A0A087X2G1_HUMAN;sp|Q92499|DDX1_HUMAN	1	2302800	1	1	1	1	1	2302800	1	2;2;2	2;2;2	2;2;2	tr|F1T0B3|F1T0B3_HUMAN ATP-dependent RNA helicase DDX1 OS=Homo sapiens GN=DDX1 PE=1 SV=1;tr|A0A087X2G1|A0A087X2G1_HUMAN ATP-dependent RNA helicase DDX1 OS=Homo sapiens GN=DDX1 PE=1 SV=1;sp|Q92499|DDX1_HUMAN ATP-dependent RNA helicase DDX1 OS=Homo sapiens G	3	2	2	2	0	0	0	0	2	1	0	0	0	0	2	1	0	0	0	0	2	1	4.4	4.4	4.4	73.915	659	659;659;740	0	12.612	0	0	0	0	4.4
sp|Q12789|TF3C1_HUMAN	sp|Q12789|TF3C1_HUMAN	1	2222500	1	1	1	1	1	2222500	1	2	2	2	sp|Q12789|TF3C1_HUMAN General transcription factor 3C polypeptide 1 OS=Homo sapiens GN=GTF3C1 PE=1 SV=4	1	2	2	2	0	0	0	0	1	1	0	0	0	0	1	1	0	0	0	0	1	1	1.5	1.5	1.5	238.87	2109	2109	0	11.716	0	0	0	0	0.7
sp|O43251|RFOX2_HUMAN;tr|S4R3K7|S4R3K7_HUMAN;tr|A0A0G2JRA5|A0A0G2JRA5_HUMAN;tr|B0QYV1|B0QYV1_HUMAN;tr|A0A0G2JRD1|A0A0G2JRD1_HUMAN;tr|S4R469|S4R469_HUMAN;tr|F8VR27|F8VR27_HUMAN;tr|F8VZY7|F8VZY7_HUMAN;tr|I3L1D4|I3L1D4_HUMAN;tr|B0QYY4|B0QYY4_HUMAN;tr|A0A087X2B1|A0A087X2B1_HUMAN;tr|B0QYY7|B0QYY7_HUMAN;sp|Q9NWB1|RFOX1_HUMAN;tr|J3KNW3|J3KNW3_HUMAN;tr|B7Z1U7|B7Z1U7_HUMAN;tr|F8VZG9|F8VZG9_HUMAN;tr|A0A0G2…	sp|O43251|RFOX2_HUMAN;tr|S4R3K7|S4R3K7_HUMAN;tr|A0A0G2JRA5|A0A0G2JRA5_HUMAN;tr|B0QYV1|B0QYV1_HUMAN;tr|A0A0G2JRD1|A0A0G2JRD1_HUMAN;tr|S4R469|S4R469_HUMAN;tr|F8VR27|F8VR27_HUMAN;tr|F8VZY7|F8VZY7_HUMAN;tr|I3L1D4|I3L1D4_HUMAN;tr|B0QYY4|B0QYY4_HUMAN;tr|A0A087X2B1|A0A087X2B1_HUMAN;tr|B0QYY7|B0QYY7_HUMAN;sp|Q9NWB1|RFOX1_HUMAN;tr|J3KNW3|J3KNW3_HUMAN;tr|B7Z1U7|B7Z1U7_HUMAN;tr|F8VZG9|F8VZG9_HUMAN;tr|A0A0G2…	1	2190500	1	1	1	1	1	2190500	1	2;2;2;2;2;1;1;1;1;1;1;1;1;1;1;1;1	2;2;2;2;2;1;1;1;1;1;1;1;1;1;1;1;1	2;2;2;2;2;1;1;1;1;1;1;1;1;1;1;1;1	sp|O43251|RFOX2_HUMAN RNA binding protein fox-1 homolog 2 OS=Homo sapiens GN=RBFOX2 PE=1 SV=3;tr|S4R3K7|S4R3K7_HUMAN RNA-binding protein fox-1 homolog 2 (Fragment) OS=Homo sapiens GN=RBFOX2 PE=1 SV=1;tr|A0A0G2JRA5|A0A0G2JRA5_HUMAN RNA-binding protein fox-1	17	2	2	2	0	0	0	0	2	1	0	0	0	0	2	1	0	0	0	0	2	1	5	5	5	87.415	826	826;230;389;357;227;234;262;263;189;370;375;200;397;402;425;466;186	0	13.381	0	0	0	0	5
tr|F5GWX5|F5GWX5_HUMAN;sp|Q14839|CHD4_HUMAN;tr|A0A0C4DGG9|A0A0C4DGG9_HUMAN;tr|K7EMY3|K7EMY3_HUMAN;sp|Q8TDI0|CHD5_HUMAN;tr|F2Z2R5|F2Z2R5_HUMAN	tr|F5GWX5|F5GWX5_HUMAN;sp|Q14839|CHD4_HUMAN;tr|A0A0C4DGG9|A0A0C4DGG9_HUMAN;tr|K7EMY3|K7EMY3_HUMAN;sp|Q8TDI0|CHD5_HUMAN	1	2183700	1	1	1	1	1	2183700	1	3;3;3;2;2;1	3;3;3;2;2;1	3;3;3;2;2;1	tr|F5GWX5|F5GWX5_HUMAN Chromodomain-helicase-DNA-binding protein 4 OS=Homo sapiens GN=CHD4 PE=1 SV=1;sp|Q14839|CHD4_HUMAN Chromodomain-helicase-DNA-binding protein 4 OS=Homo sapiens GN=CHD4 PE=1 SV=2;tr|A0A0C4DGG9|A0A0C4DGG9_HUMAN Chromodomain-helicase-DNA	6	3	3	3	0	0	0	0	2	1	0	0	0	0	2	1	0	0	0	0	2	1	2	2	2	217.1	1905	1905;1912;1937;1060;1954;1225	0	18.265	0	0	0	0	1.4
sp|Q9NTI5|PDS5B_HUMAN;tr|A9IYQ1|A9IYQ1_HUMAN	sp|Q9NTI5|PDS5B_HUMAN	1	2179100	1	1	1	1	1	2179100	1	3;1	3;1	3;1	sp|Q9NTI5|PDS5B_HUMAN Sister chromatid cohesion protein PDS5 homolog B OS=Homo sapiens GN=PDS5B PE=1 SV=1	2	3	3	3	0	0	0	0	2	1	0	0	0	0	2	1	0	0	0	0	2	1	3.2	3.2	3.2	164.67	1447	1447;302	0	17.275	0	0	0	0	2.1
CON__Q3SX09	CON__Q3SX09	1	2169300	1	1	1	1	1	2169300	1	2	2	2		1	2	2	2	0	0	0	0	2	0	0	0	0	0	2	0	0	0	0	0	2	0	8	8	8	22.06	201	201	0	12.206	0	0	0	0	8
sp|Q9Y3C6|PPIL1_HUMAN	sp|Q9Y3C6|PPIL1_HUMAN	1	2095400	1	1	1	1	1	2095400	1	2	2	2	sp|Q9Y3C6|PPIL1_HUMAN Peptidyl-prolyl cis-trans isomerase-like 1 OS=Homo sapiens GN=PPIL1 PE=1 SV=1	1	2	2	2	1	0	0	1	2	1	1	0	0	1	2	1	1	0	0	1	2	1	20.5	20.5	20.5	18.237	166	166	0	12	10.2	0	0	10.2	20.5
sp|P62273|RS29_HUMAN	sp|P62273|RS29_HUMAN	1	2092800	1	1	1	1	1	2092800	1	1	1	1	sp|P62273|RS29_HUMAN 40S ribosomal protein S29 OS=Homo sapiens GN=RPS29 PE=1 SV=2	1	1	1	1	0	0	0	0	1	1	0	0	0	0	1	1	0	0	0	0	1	1	19.6	19.6	19.6	6.6767	56	56	0.0057061	6.5318	0	0	0	0	19.6
sp|O75400|PR40A_HUMAN;tr|H0YG38|H0YG38_HUMAN;tr|F5H578|F5H578_HUMAN	sp|O75400|PR40A_HUMAN	1	2074300	1	1	1	1	1	2074300	1	4;1;1	4;1;1	4;1;1	sp|O75400|PR40A_HUMAN Pre-mRNA-processing factor 40 homolog A OS=Homo sapiens GN=PRPF40A PE=1 SV=2	3	4	4	4	1	0	0	0	2	2	1	0	0	0	2	2	1	0	0	0	2	2	4.7	4.7	4.7	108.8	957	957;346;448	0	23.297	1.4	0	0	0	2.6
REV__tr|B9A063|B9A063_HUMAN;REV__sp|Q6PIF6|MYO7B_HUMAN	REV__tr|B9A063|B9A063_HUMAN;REV__sp|Q6PIF6|MYO7B_HUMAN	1	2039900	1	1	1	1	1	2039900	1	1;1	1;1	1;1	tr|B9A063|B9A063_HUMAN Unconventional myosin-VIIb OS=Homo sapiens GN=MYO7B PE=1 SV=1;sp|Q6PIF6|MYO7B_HUMAN Unconventional myosin-VIIb OS=Homo sapiens GN=MYO7B PE=1 SV=2	2	1	1	1	0	0	0	0	1	0	0	0	0	0	1	0	0	0	0	0	1	0	0	0	0	110.38	969	969;2116	0.0058309	6.639	0	0	0	0	0
sp|O43281|EFS_HUMAN	sp|O43281|EFS_HUMAN	1	2020700	1	1	1	1	1	2020700	1	2	2	2	sp|O43281|EFS_HUMAN Embryonal Fyn-associated substrate OS=Homo sapiens GN=EFS PE=1 SV=1	1	2	2	2	0	0	0	0	2	1	0	0	0	0	2	1	0	0	0	0	2	1	2.2	2.2	2.2	160.3	1506	1506	0	16.776	0	0	0	0	2.2
tr|B9A008|B9A008_HUMAN;tr|B8ZZ47|B8ZZ47_HUMAN;tr|H0Y714|H0Y714_HUMAN;sp|Q96G21|IMP4_HUMAN;tr|E7ENR5|E7ENR5_HUMAN	tr|B9A008|B9A008_HUMAN;tr|B8ZZ47|B8ZZ47_HUMAN;tr|H0Y714|H0Y714_HUMAN;sp|Q96G21|IMP4_HUMAN;tr|E7ENR5|E7ENR5_HUMAN	1	2018000	1	1	1	1	1	2018000	1	1;1;1;1;1	1;1;1;1;1	1;1;1;1;1	tr|B9A008|B9A008_HUMAN U3 small nucleolar ribonucleoprotein protein IMP4 (Fragment) OS=Homo sapiens GN=IMP4 PE=1 SV=1;tr|B8ZZ47|B8ZZ47_HUMAN U3 small nucleolar ribonucleoprotein protein IMP4 OS=Homo sapiens GN=IMP4 PE=1 SV=1;tr|H0Y714|H0Y714_HUMAN U3 small	5	1	1	1	0	0	0	0	1	0	0	0	0	0	1	0	0	0	0	0	1	0	8.1	8.1	8.1	19.619	172	172;248;280;291;538	0	14.243	0	0	0	0	8.1
sp|Q6P6C2|ALKB5_HUMAN	sp|Q6P6C2|ALKB5_HUMAN	1	1993500	1	1	1	1	1	1993500	1	1	1	1	sp|Q6P6C2|ALKB5_HUMAN RNA demethylase ALKBH5 OS=Homo sapiens GN=ALKBH5 PE=1 SV=2	1	1	1	1	0	0	0	0	1	0	0	0	0	0	1	0	0	0	0	0	1	0	7.4	7.4	7.4	44.255	394	394	0.0016103	8.2745	0	0	0	0	7.4
sp|O75940|SPF30_HUMAN	sp|O75940|SPF30_HUMAN	1	1989700	1	1	1	1	1	1989700	1	1	1	1	sp|O75940|SPF30_HUMAN Survival of motor neuron-related-splicing factor 30 OS=Homo sapiens GN=SMNDC1 PE=1 SV=1	1	1	1	1	0	0	0	0	1	1	0	0	0	0	1	1	0	0	0	0	1	1	4.2	4.2	4.2	26.711	238	238	0.0069832	6.3963	0	0	0	0	4.2
tr|B4DJV5|B4DJV5_HUMAN;sp|Q13610|PWP1_HUMAN	tr|B4DJV5|B4DJV5_HUMAN;sp|Q13610|PWP1_HUMAN	1	1898400	1	1	1	1	1	1898400	1	1;1	1;1	1;1	tr|B4DJV5|B4DJV5_HUMAN Periodic tryptophan protein 1 homolog OS=Homo sapiens GN=PWP1 PE=1 SV=1;sp|Q13610|PWP1_HUMAN Periodic tryptophan protein 1 homolog OS=Homo sapiens GN=PWP1 PE=1 SV=1	2	1	1	1	0	0	0	0	1	0	0	0	0	0	1	0	0	0	0	0	1	0	4.8	4.8	4.8	49.038	439	439;501	0.009434	6.1867	0	0	0	0	4.8
sp|Q9NQT5|EXOS3_HUMAN	sp|Q9NQT5|EXOS3_HUMAN	1	1847500	1	1	1	1	1	1847500	1	3	3	3	sp|Q9NQT5|EXOS3_HUMAN Exosome complex component RRP40 OS=Homo sapiens GN=EXOSC3 PE=1 SV=3	1	3	3	3	0	0	0	0	2	1	0	0	0	0	2	1	0	0	0	0	2	1	13.8	13.8	13.8	29.572	275	275	0	17.125	0	0	0	0	13.8
sp|P48634|PRC2A_HUMAN	sp|P48634|PRC2A_HUMAN	1	1833400	1	1	1	1	1	1833400	1	1	1	1	sp|P48634|PRC2A_HUMAN Protein PRRC2A OS=Homo sapiens GN=PRRC2A PE=1 SV=3	1	1	1	1	0	0	0	0	1	0	0	0	0	0	1	0	0	0	0	0	1	0	1.4	1.4	1.4	228.86	2157	2157	0.0056338	6.4369	0	0	0	0	1.4
tr|C9JYA6|C9JYA6_HUMAN;sp|O75319|DUS11_HUMAN;tr|H7C0E6|H7C0E6_HUMAN	tr|C9JYA6|C9JYA6_HUMAN;sp|O75319|DUS11_HUMAN;tr|H7C0E6|H7C0E6_HUMAN	1	1806000	1	1	1	1	1	1806000	1	2;2;2	2;2;2	2;2;2	tr|C9JYA6|C9JYA6_HUMAN RNA/RNP complex-1-interacting phosphatase OS=Homo sapiens GN=DUSP11 PE=1 SV=1;sp|O75319|DUS11_HUMAN RNA/RNP complex-1-interacting phosphatase OS=Homo sapiens GN=DUSP11 PE=1 SV=1;tr|H7C0E6|H7C0E6_HUMAN RNA/RNP complex-1-interacting ph	3	2	2	2	0	0	0	0	1	1	0	0	0	0	1	1	0	0	0	0	1	1	11.4	11.4	11.4	30.59	273	273;330;472	0.0016474	10.762	0	0	0	0	5.9
tr|F8VQE1|F8VQE1_HUMAN;tr|F8VS07|F8VS07_HUMAN;sp|Q9UHB6|LIMA1_HUMAN	tr|F8VQE1|F8VQE1_HUMAN;tr|F8VS07|F8VS07_HUMAN;sp|Q9UHB6|LIMA1_HUMAN	2261900	1777600	1	1	1	1	2261900	1777600	1	3;3;3	3;3;3	3;3;3	tr|F8VQE1|F8VQE1_HUMAN LIM domain and actin-binding protein 1 OS=Homo sapiens GN=LIMA1 PE=1 SV=1;tr|F8VS07|F8VS07_HUMAN LIM domain and actin-binding protein 1 OS=Homo sapiens GN=LIMA1 PE=1 SV=1;sp|Q9UHB6|LIMA1_HUMAN LIM domain and actin-binding protein 1 O	3	3	3	3	2	0	0	2	2	1	2	0	0	2	2	1	2	0	0	2	2	1	6.7	6.7	6.7	66.99	598	598;701;759	0	22.868	4.7	0	0	4.8	4.8
tr|I3L2C7|I3L2C7_HUMAN;sp|P57678|GEMI4_HUMAN	tr|I3L2C7|I3L2C7_HUMAN;sp|P57678|GEMI4_HUMAN	1	1775800	1	1	1	1	1	1775800	1	2;2	2;2	2;2	tr|I3L2C7|I3L2C7_HUMAN Gem-associated protein 4 OS=Homo sapiens GN=GEMIN4 PE=1 SV=1;sp|P57678|GEMI4_HUMAN Gem-associated protein 4 OS=Homo sapiens GN=GEMIN4 PE=1 SV=2	2	2	2	2	0	0	0	0	2	0	0	0	0	0	2	0	0	0	0	0	2	0	1.8	1.8	1.8	118.82	1047	1047;1058	0	11.029	0	0	0	0	1.8
sp|Q9HCS7|SYF1_HUMAN	sp|Q9HCS7|SYF1_HUMAN	1	1770700	1	1	1	1	1	1770700	1	3	3	3	sp|Q9HCS7|SYF1_HUMAN Pre-mRNA-splicing factor SYF1 OS=Homo sapiens GN=XAB2 PE=1 SV=2	1	3	3	3	0	0	0	0	2	1	0	0	0	0	2	1	0	0	0	0	2	1	4.4	4.4	4.4	100.01	855	855	0	21.273	0	0	0	0	2.8
sp|Q01130|SRSF2_HUMAN;tr|J3QL05|J3QL05_HUMAN;tr|J3KP15|J3KP15_HUMAN;sp|Q9BRL6|SRSF8_HUMAN	sp|Q01130|SRSF2_HUMAN;tr|J3QL05|J3QL05_HUMAN;tr|J3KP15|J3KP15_HUMAN;sp|Q9BRL6|SRSF8_HUMAN	1	1606800	1	1	1	1	1	1606800	1	2;2;2;1	2;2;2;1	2;2;2;1	sp|Q01130|SRSF2_HUMAN Serine/arginine-rich splicing factor 2 OS=Homo sapiens GN=SRSF2 PE=1 SV=4;tr|J3QL05|J3QL05_HUMAN Serine/arginine-rich-splicing factor 2 (Fragment) OS=Homo sapiens GN=SRSF2 PE=1 SV=1;tr|J3KP15|J3KP15_HUMAN Serine/arginine-rich-splicing	4	2	2	2	0	0	0	1	2	1	0	0	0	1	2	1	0	0	0	1	2	1	11.3	11.3	11.3	25.476	221	221;323;335;282	0	11.937	0	0	0	3.6	11.3
sp|Q9P258|RCC2_HUMAN	sp|Q9P258|RCC2_HUMAN	1	1605400	1	1	1	1	1	1605400	1	2	2	2	sp|Q9P258|RCC2_HUMAN Protein RCC2 OS=Homo sapiens GN=RCC2 PE=1 SV=2	1	2	2	2	1	0	0	0	1	0	1	0	0	0	1	0	1	0	0	0	1	0	5.4	5.4	5.4	56.084	522	522	0	11.41	2.9	0	0	0	2.5
tr|J3KSP2|J3KSP2_HUMAN;tr|J3KT73|J3KT73_HUMAN;tr|J3QL01|J3QL01_HUMAN;sp|P63173|RL38_HUMAN	tr|J3KSP2|J3KSP2_HUMAN;tr|J3KT73|J3KT73_HUMAN;tr|J3QL01|J3QL01_HUMAN;sp|P63173|RL38_HUMAN	1	1596200	1	1	1	1	1	1596200	1	1;1;1;1	1;1;1;1	1;1;1;1	tr|J3KSP2|J3KSP2_HUMAN 60S ribosomal protein L38 (Fragment) OS=Homo sapiens GN=RPL38 PE=1 SV=1;tr|J3KT73|J3KT73_HUMAN 60S ribosomal protein L38 OS=Homo sapiens GN=RPL38 PE=1 SV=1;tr|J3QL01|J3QL01_HUMAN 60S ribosomal protein L38 OS=Homo sapiens GN=RPL38 PE=	4	1	1	1	0	0	0	0	1	0	0	0	0	0	1	0	0	0	0	0	1	0	61.9	61.9	61.9	2.559	21	21;64;67;70	0.0093834	6.1418	0	0	0	0	61.9
tr|Q5JY65|Q5JY65_HUMAN;sp|Q9BZJ0|CRNL1_HUMAN	tr|Q5JY65|Q5JY65_HUMAN;sp|Q9BZJ0|CRNL1_HUMAN	1	1551100	1	1	1	1	1	1551100	1	2;2	2;2	2;2	tr|Q5JY65|Q5JY65_HUMAN Crooked neck-like protein 1 OS=Homo sapiens GN=CRNKL1 PE=1 SV=1;sp|Q9BZJ0|CRNL1_HUMAN Crooked neck-like protein 1 OS=Homo sapiens GN=CRNKL1 PE=1 SV=4	2	2	2	2	0	0	0	1	2	1	0	0	0	1	2	1	0	0	0	1	2	1	3	3	3	99.172	836	836;848	0	14.543	0	0	0	1.3	3
sp|Q9Y5B9|SP16H_HUMAN	sp|Q9Y5B9|SP16H_HUMAN	1	1522700	1	1	1	1	1	1522700	1	1	1	1	sp|Q9Y5B9|SP16H_HUMAN FACT complex subunit SPT16 OS=Homo sapiens GN=SUPT16H PE=1 SV=1	1	1	1	1	0	0	0	0	1	0	0	0	0	0	1	0	0	0	0	0	1	0	1.4	1.4	1.4	119.91	1047	1047	0.0015337	7.0848	0	0	0	0	1.4
sp|Q9H8S9|MOB1A_HUMAN;sp|Q7L9L4|MOB1B_HUMAN	sp|Q9H8S9|MOB1A_HUMAN;sp|Q7L9L4|MOB1B_HUMAN	1	1485400	1	1	1	1	1	1485400	1	1;1	1;1	1;1	sp|Q9H8S9|MOB1A_HUMAN MOB kinase activator 1A OS=Homo sapiens GN=MOB1A PE=1 SV=4;sp|Q7L9L4|MOB1B_HUMAN MOB kinase activator 1B OS=Homo sapiens GN=MOB1B PE=1 SV=3	2	1	1	1	1	0	0	0	1	0	1	0	0	0	1	0	1	0	0	0	1	0	5.1	5.1	5.1	25.079	216	216;216	0.0081744	6.268	5.1	0	0	0	5.1
sp|Q14669|TRIPC_HUMAN	sp|Q14669|TRIPC_HUMAN	1	1478000	1	1	1	1	1	1478000	1	2	2	2	sp|Q14669|TRIPC_HUMAN E3 ubiquitin-protein ligase TRIP12 OS=Homo sapiens GN=TRIP12 PE=1 SV=1	1	2	2	2	0	0	0	0	2	1	0	0	0	0	2	1	0	0	0	0	2	1	1.4	1.4	1.4	220.43	1992	1992	0	15.353	0	0	0	0	1.4
sp|Q9NQZ2|SAS10_HUMAN	sp|Q9NQZ2|SAS10_HUMAN	1	1432300	1	1	1	1	1	1432300	1	1	1	1	sp|Q9NQZ2|SAS10_HUMAN Something about silencing protein 10 OS=Homo sapiens GN=UTP3 PE=1 SV=1	1	1	1	1	0	0	0	0	1	0	0	0	0	0	1	0	0	0	0	0	1	0	4.6	4.6	4.6	54.557	479	479	0.0016287	9.0463	0	0	0	0	4.6
sp|P16104|H2AX_HUMAN;sp|Q96QV6|H2A1A_HUMAN;sp|Q8IUE6|H2A2B_HUMAN	sp|P16104|H2AX_HUMAN;sp|Q96QV6|H2A1A_HUMAN;sp|Q8IUE6|H2A2B_HUMAN	1	1396200	1	1	1	1	1	1396200	1	4;4;2	1;1;1	1;1;1	sp|P16104|H2AX_HUMAN Histone H2AX OS=Homo sapiens GN=H2AFX PE=1 SV=2;sp|Q96QV6|H2A1A_HUMAN Histone H2A type 1-A OS=Homo sapiens GN=HIST1H2AA PE=1 SV=3;sp|Q8IUE6|H2A2B_HUMAN Histone H2A type 2-B OS=Homo sapiens GN=HIST2H2AB PE=1 SV=3	3	4	1	1	1	1	1	1	3	2	0	0	0	0	1	0	0	0	0	0	1	0	32.2	16.1	16.1	15.144	143	143;131;130	0.001642	9.7959	6.3	6.3	6.3	6.3	32.2
sp|Q96FX7|TRM61_HUMAN	sp|Q96FX7|TRM61_HUMAN	1	1339800	1	1	1	1	1	1339800	1	1	1	1	sp|Q96FX7|TRM61_HUMAN tRNA (adenine(58)-N(1))-methyltransferase catalytic subunit TRMT61A OS=Homo sapiens GN=TRMT61A PE=1 SV=1	1	1	1	1	0	0	0	0	1	0	0	0	0	0	1	0	0	0	0	0	1	0	3.5	3.5	3.5	31.381	289	289	0.0014837	6.8249	0	0	0	0	3.5
sp|Q8WXI9|P66B_HUMAN	sp|Q8WXI9|P66B_HUMAN	1	1336400	1	1	1	1	1	1336400	1	2	1	1	sp|Q8WXI9|P66B_HUMAN Transcriptional repressor p66-beta OS=Homo sapiens GN=GATAD2B PE=1 SV=1	1	2	1	1	2	0	0	1	1	0	1	0	0	1	1	0	1	0	0	1	1	0	6.1	4.2	4.2	65.26	593	593	0.0056259	6.4213	6.1	0	0	4.2	4.2
sp|Q9NW64|RBM22_HUMAN;tr|E5RJW4|E5RJW4_HUMAN	sp|Q9NW64|RBM22_HUMAN	1	1260400	1	1	1	1	1	1260400	1	3;1	3;1	3;1	sp|Q9NW64|RBM22_HUMAN Pre-mRNA-splicing factor RBM22 OS=Homo sapiens GN=RBM22 PE=1 SV=1	2	3	3	3	1	0	0	0	2	1	1	0	0	0	2	1	1	0	0	0	2	1	8.8	8.8	8.8	46.895	420	420;179	0	17.492	2.6	0	0	0	6.2
tr|M0R0K9|M0R0K9_HUMAN;sp|Q13263|TIF1B_HUMAN	tr|M0R0K9|M0R0K9_HUMAN;sp|Q13263|TIF1B_HUMAN	1	1247500	1	1	1	1	1	1247500	1	1;1	1;1	1;1	tr|M0R0K9|M0R0K9_HUMAN Transcription intermediary factor 1-beta (Fragment) OS=Homo sapiens GN=TRIM28 PE=1 SV=1;sp|Q13263|TIF1B_HUMAN Transcription intermediary factor 1-beta OS=Homo sapiens GN=TRIM28 PE=1 SV=5	2	1	1	1	0	0	0	0	1	0	0	0	0	0	1	0	0	0	0	0	1	0	3.3	3.3	3.3	48.434	460	460;835	0.0029542	6.7843	0	0	0	0	3.3
sp|Q08945|SSRP1_HUMAN	sp|Q08945|SSRP1_HUMAN	1	1201500	1	1	1	1	1	1201500	1	1	1	1	sp|Q08945|SSRP1_HUMAN FACT complex subunit SSRP1 OS=Homo sapiens GN=SSRP1 PE=1 SV=1	1	1	1	1	0	0	0	0	1	0	0	0	0	0	1	0	0	0	0	0	1	0	1.6	1.6	1.6	81.074	709	709	0.0029499	6.7825	0	0	0	0	1.6
tr|B0QY90|B0QY90_HUMAN;sp|Q9Y262|EIF3L_HUMAN;tr|B0QY89|B0QY89_HUMAN	tr|B0QY90|B0QY90_HUMAN;sp|Q9Y262|EIF3L_HUMAN;tr|B0QY89|B0QY89_HUMAN	1	1144900	1	1	1	1	1	1144900	1	1;1;1	1;1;1	1;1;1	tr|B0QY90|B0QY90_HUMAN Eukaryotic translation initiation factor 3 subunit L OS=Homo sapiens GN=EIF3L PE=1 SV=1;sp|Q9Y262|EIF3L_HUMAN Eukaryotic translation initiation factor 3 subunit L OS=Homo sapiens GN=EIF3L PE=1 SV=1;tr|B0QY89|B0QY89_HUMAN Eukaryotic t	3	1	1	1	1	0	0	0	1	0	1	0	0	0	1	0	1	0	0	0	1	0	3.4	3.4	3.4	55.161	466	466;564;607	0	10.938	3.4	0	0	0	3.4
sp|P26196|DDX6_HUMAN	sp|P26196|DDX6_HUMAN	1	1073900	1	1	1	1	1	1073900	1	1	1	1	sp|P26196|DDX6_HUMAN Probable ATP-dependent RNA helicase DDX6 OS=Homo sapiens GN=DDX6 PE=1 SV=2	1	1	1	1	0	0	0	0	1	0	0	0	0	0	1	0	0	0	0	0	1	0	3.9	3.9	3.9	54.416	483	483	0.0056022	6.4116	0	0	0	0	3.9
sp|P55008|AIF1_HUMAN	sp|P55008|AIF1_HUMAN	1	1069900	1	1	1	1	1	1069900	1	1	1	1	sp|P55008|AIF1_HUMAN Allograft inflammatory factor 1 OS=Homo sapiens GN=AIF1 PE=1 SV=1	1	1	1	1	0	0	0	0	1	0	0	0	0	0	1	0	0	0	0	0	1	0	1.5	1.5	1.5	92.452	853	853	0.0015038	6.9789	0	0	0	0	1.5
sp|Q9UH17|ABC3B_HUMAN;tr|B0QYD3|B0QYD3_HUMAN	sp|Q9UH17|ABC3B_HUMAN;tr|B0QYD3|B0QYD3_HUMAN	1	1061400	1	1	1	1	1	1061400	1	2;2	2;2	1;1	sp|Q9UH17|ABC3B_HUMAN DNA dC->dU-editing enzyme APOBEC-3B OS=Homo sapiens GN=APOBEC3B PE=1 SV=1;tr|B0QYD3|B0QYD3_HUMAN DNA dC->dU-editing enzyme APOBEC-3B OS=Homo sapiens GN=APOBEC3B PE=1 SV=1	2	2	2	1	0	0	0	0	2	0	0	0	0	0	2	0	0	0	0	0	1	0	5.5	5.5	2.6	45.924	382	382;490	0	11.52	0	0	0	0	5.5
tr|E9PJ24|E9PJ24_HUMAN;tr|F8WEF5|F8WEF5_HUMAN;sp|Q9P1Y6|PHRF1_HUMAN	tr|E9PJ24|E9PJ24_HUMAN;tr|F8WEF5|F8WEF5_HUMAN;sp|Q9P1Y6|PHRF1_HUMAN	1	1046800	1	1	1	1	1	1046800	1	1;1;1	1;1;1	1;1;1	tr|E9PJ24|E9PJ24_HUMAN PHD and RING finger domain-containing protein 1 OS=Homo sapiens GN=PHRF1 PE=1 SV=1;tr|F8WEF5|F8WEF5_HUMAN PHD and RING finger domain-containing protein 1 OS=Homo sapiens GN=PHRF1 PE=1 SV=1;sp|Q9P1Y6|PHRF1_HUMAN PHD and RING finger do	3	1	1	1	0	0	0	0	1	0	0	0	0	0	1	0	0	0	0	0	1	0	1.1	1.1	1.1	178.22	1645	1645;1647;1649	0.0015152	7.0266	0	0	0	0	1.1
tr|E9PPY3|E9PPY3_HUMAN;sp|O43159|RRP8_HUMAN	tr|E9PPY3|E9PPY3_HUMAN;sp|O43159|RRP8_HUMAN	1	1044600	1	1	1	1	1	1044600	1	1;1	1;1	1;1	tr|E9PPY3|E9PPY3_HUMAN Ribosomal RNA-processing protein 8 OS=Homo sapiens GN=RRP8 PE=1 SV=1;sp|O43159|RRP8_HUMAN Ribosomal RNA-processing protein 8 OS=Homo sapiens GN=RRP8 PE=1 SV=2	2	1	1	1	0	0	0	0	1	0	0	0	0	0	1	0	0	0	0	0	1	0	4.6	4.6	4.6	34.2	306	306;456	0.0015823	7.7029	0	0	0	0	4.6
sp|Q9H501|ESF1_HUMAN;tr|A0A087WX71|A0A087WX71_HUMAN	sp|Q9H501|ESF1_HUMAN;tr|A0A087WX71|A0A087WX71_HUMAN	1	1041400	1	1	1	1	1	1041400	1	2;1	2;1	2;1	sp|Q9H501|ESF1_HUMAN ESF1 homolog OS=Homo sapiens GN=ESF1 PE=1 SV=1;tr|A0A087WX71|A0A087WX71_HUMAN ESF1 homolog OS=Homo sapiens GN=ESF1 PE=1 SV=1	2	2	2	2	0	0	0	0	1	1	0	0	0	0	1	1	0	0	0	0	1	1	2.4	2.4	2.4	98.795	851	851;456	0	11.478	0	0	0	0	1.3
tr|F5H282|F5H282_HUMAN;tr|E7EQR6|E7EQR6_HUMAN;sp|P17987|TCPA_HUMAN	tr|F5H282|F5H282_HUMAN;tr|E7EQR6|E7EQR6_HUMAN;sp|P17987|TCPA_HUMAN	1	1030500	1	1	1	1	1	1030500	1	1;1;1	1;1;1	1;1;1	tr|F5H282|F5H282_HUMAN T-complex protein 1 subunit alpha OS=Homo sapiens GN=TCP1 PE=1 SV=1;tr|E7EQR6|E7EQR6_HUMAN T-complex protein 1 subunit alpha OS=Homo sapiens GN=TCP1 PE=1 SV=1;sp|P17987|TCPA_HUMAN T-complex protein 1 subunit alpha OS=Homo sapiens GN=	3	1	1	1	0	0	0	0	1	0	0	0	0	0	1	0	0	0	0	0	1	0	6.9	6.9	6.9	36.456	332	332;401;556	0.0016447	10.159	0	0	0	0	6.9
sp|O43395|PRPF3_HUMAN	sp|O43395|PRPF3_HUMAN	1	1018500	1	1	1	1	1	1018500	1	1	1	1	sp|O43395|PRPF3_HUMAN U4/U6 small nuclear ribonucleoprotein Prp3 OS=Homo sapiens GN=PRPF3 PE=1 SV=2	1	1	1	1	0	0	0	0	1	0	0	0	0	0	1	0	0	0	0	0	1	0	3.2	3.2	3.2	77.528	683	683	0.001497	6.9121	0	0	0	0	3.2
sp|Q96EU6|RRP36_HUMAN	sp|Q96EU6|RRP36_HUMAN	1	1012400	1	1	1	1	1	1012400	1	1	1	1	sp|Q96EU6|RRP36_HUMAN Ribosomal RNA processing protein 36 homolog OS=Homo sapiens GN=RRP36 PE=1 SV=1	1	1	1	1	0	0	0	0	1	0	0	0	0	0	1	0	0	0	0	0	1	0	5.8	5.8	5.8	29.823	259	259	0.0016077	8.1972	0	0	0	0	5.8
sp|Q86V59|PNML1_HUMAN	sp|Q86V59|PNML1_HUMAN	1	965940	1	1	1	1	1	965940	1	2	2	2	sp|Q86V59|PNML1_HUMAN PNMA-like protein 1 OS=Homo sapiens GN=PNMAL1 PE=1 SV=2	1	2	2	2	0	0	0	0	1	1	0	0	0	0	1	1	0	0	0	0	1	1	7.5	7.5	7.5	48.16	439	439	0	11.812	0	0	0	0	5
tr|A0A087WT34|A0A087WT34_HUMAN;tr|A0A087X1H1|A0A087X1H1_HUMAN;tr|A0A0A0MTS6|A0A0A0MTS6_HUMAN;sp|O95983|MBD3_HUMAN;tr|Q49AT5|Q49AT5_HUMAN	tr|A0A087WT34|A0A087WT34_HUMAN;tr|A0A087X1H1|A0A087X1H1_HUMAN;tr|A0A0A0MTS6|A0A0A0MTS6_HUMAN;sp|O95983|MBD3_HUMAN;tr|Q49AT5|Q49AT5_HUMAN	1	935830	1	1	1	1	1	935830	1	1;1;1;1;1	1;1;1;1;1	1;1;1;1;1	tr|A0A087WT34|A0A087WT34_HUMAN Methyl-CpG-binding domain protein 3 (Fragment) OS=Homo sapiens GN=MBD3 PE=1 SV=1;tr|A0A087X1H1|A0A087X1H1_HUMAN Methyl-CpG-binding domain protein 3 (Fragment) OS=Homo sapiens GN=MBD3 PE=1 SV=1;tr|A0A0A0MTS6|A0A0A0MTS6_HUMAN M	5	1	1	1	0	0	0	0	1	0	0	0	0	0	1	0	0	0	0	0	1	0	11.5	11.5	11.5	14.46	130	130;147;185;291;951	0.0015314	7.0848	0	0	0	0	11.5
tr|Q5H928|Q5H928_HUMAN;sp|Q99714|HCD2_HUMAN	tr|Q5H928|Q5H928_HUMAN;sp|Q99714|HCD2_HUMAN	1	927020	1	1	1	1	1	927020	1	1;1	1;1	1;1	tr|Q5H928|Q5H928_HUMAN 3-hydroxyacyl-CoA dehydrogenase type-2 OS=Homo sapiens GN=HSD17B10 PE=1 SV=1;sp|Q99714|HCD2_HUMAN 3-hydroxyacyl-CoA dehydrogenase type-2 OS=Homo sapiens GN=HSD17B10 PE=1 SV=3	2	1	1	1	0	0	0	0	1	0	0	0	0	0	1	0	0	0	0	0	1	0	13.6	13.6	13.6	17.224	169	169;675	0.0015175	7.0311	0	0	0	0	13.6
sp|Q15361|TTF1_HUMAN	sp|Q15361|TTF1_HUMAN	1	899740	1	1	1	1	1	899740	1	1	1	1	sp|Q15361|TTF1_HUMAN Transcription termination factor 1 OS=Homo sapiens GN=TTF1 PE=1 SV=3	1	1	1	1	0	0	0	0	1	0	0	0	0	0	1	0	0	0	0	0	1	0	2.1	2.1	2.1	103.05	905	905	0.0057554	6.558	0	0	0	0	2.1
sp|O95816|BAG2_HUMAN	sp|O95816|BAG2_HUMAN	1	895140	1	1	1	1	1	895140	1	1	1	1	sp|O95816|BAG2_HUMAN BAG family molecular chaperone regulator 2 OS=Homo sapiens GN=BAG2 PE=1 SV=1	1	1	1	1	0	0	0	0	1	0	0	0	0	0	1	0	0	0	0	0	1	0	5.2	5.2	5.2	23.772	211	211	0.0069638	6.3883	0	0	0	0	5.2
tr|A0A0C4DH52|A0A0C4DH52_HUMAN;sp|Q9NZB2|F120A_HUMAN	tr|A0A0C4DH52|A0A0C4DH52_HUMAN;sp|Q9NZB2|F120A_HUMAN	1	841920	1	1	1	1	1	841920	1	1;1	1;1	1;1	tr|A0A0C4DH52|A0A0C4DH52_HUMAN Constitutive coactivator of PPAR-gamma-like protein 1 (Fragment) OS=Homo sapiens GN=FAM120A PE=1 SV=1;sp|Q9NZB2|F120A_HUMAN Constitutive coactivator of PPAR-gamma-like protein 1 OS=Homo sapiens GN=FAM120A PE=1 SV=2	2	1	1	1	0	0	0	0	1	0	0	0	0	0	1	0	0	0	0	0	1	0	2.8	2.8	2.8	54.06	495	495;1118	0.0014993	6.9547	0	0	0	0	2.8
sp|P04406|G3P_HUMAN	sp|P04406|G3P_HUMAN	1	828530	1	1	1	1	1	828530	1	3	3	2	sp|P04406|G3P_HUMAN Glyceraldehyde-3-phosphate dehydrogenase OS=Homo sapiens GN=GAPDH PE=1 SV=3	1	3	3	2	1	0	1	0	1	1	1	0	1	0	1	1	0	0	0	0	1	1	9.9	9.9	5.4	36.053	335	335	0	18.604	4.5	0	4.5	0	4.2
tr|C9JB16|C9JB16_HUMAN;tr|B1AM48|B1AM48_HUMAN;sp|Q12926|ELAV2_HUMAN;tr|A0A0A0MRX1|A0A0A0MRX1_HUMAN;tr|B1APY9|B1APY9_HUMAN;sp|P26378|ELAV4_HUMAN;tr|B1APY8|B1APY8_HUMAN	tr|C9JB16|C9JB16_HUMAN;tr|B1AM48|B1AM48_HUMAN;sp|Q12926|ELAV2_HUMAN;tr|A0A0A0MRX1|A0A0A0MRX1_HUMAN;tr|B1APY9|B1APY9_HUMAN;sp|P26378|ELAV4_HUMAN;tr|B1APY8|B1APY8_HUMAN	1	769680	1	1	1	1	1	769680	1	2;2;2;2;1;1;1	2;2;2;2;1;1;1	2;2;2;2;1;1;1	tr|C9JB16|C9JB16_HUMAN ELAV-like protein 2 (Fragment) OS=Homo sapiens GN=ELAVL2 PE=1 SV=1;tr|B1AM48|B1AM48_HUMAN ELAV-like protein (Fragment) OS=Homo sapiens GN=ELAVL2 PE=1 SV=1;sp|Q12926|ELAV2_HUMAN ELAV-like protein 2 OS=Homo sapiens GN=ELAVL2 PE=1 SV=2;	7	2	2	2	0	0	0	0	1	1	0	0	0	0	1	1	0	0	0	0	1	1	24.4	24.4	24.4	10.118	90	90;189;359;389;371;380;385	0	12.028	0	0	0	0	12.2
tr|F8WDL7|F8WDL7_HUMAN	tr|F8WDL7|F8WDL7_HUMAN	1	764460	1	1	1	1	1	764460	1	1	1	1	tr|F8WDL7|F8WDL7_HUMAN Uncharacterized protein C3orf17 OS=Homo sapiens GN=C3orf17 PE=1 SV=1	1	1	1	1	0	0	0	0	1	0	0	0	0	0	1	0	0	0	0	0	1	0	3	3	3	41.79	406	406	0.0068966	6.3559	0	0	0	0	3
tr|H7C528|H7C528_HUMAN;tr|B3KPJ4|B3KPJ4_HUMAN;tr|A0A0A0MSI2|A0A0A0MSI2_HUMAN;sp|Q8IXK0|PHC2_HUMAN;sp|Q8NDX5|PHC3_HUMAN	tr|H7C528|H7C528_HUMAN;tr|B3KPJ4|B3KPJ4_HUMAN;tr|A0A0A0MSI2|A0A0A0MSI2_HUMAN;sp|Q8IXK0|PHC2_HUMAN;sp|Q8NDX5|PHC3_HUMAN	1	706870	1	1	1	1	1	706870	1	1;1;1;1;1	1;1;1;1;1	1;1;1;1;1	tr|H7C528|H7C528_HUMAN Polyhomeotic-like protein 3 (Fragment) OS=Homo sapiens GN=PHC3 PE=1 SV=1;tr|B3KPJ4|B3KPJ4_HUMAN Polyhomeotic-like protein 2 OS=Homo sapiens GN=PHC2 PE=1 SV=1;tr|A0A0A0MSI2|A0A0A0MSI2_HUMAN Polyhomeotic-like protein 2 OS=Homo sapiens	5	1	1	1	0	0	0	0	1	0	0	0	0	0	1	0	0	0	0	0	1	0	8.1	8.1	8.1	18.267	161	161;464;830;858;983	0.0094213	6.1593	0	0	0	0	8.1
sp|Q5JVF3|PCID2_HUMAN	sp|Q5JVF3|PCID2_HUMAN	1	685460	1	1	1	1	1	685460	1	1	1	1	sp|Q5JVF3|PCID2_HUMAN PCI domain-containing protein 2 OS=Homo sapiens GN=PCID2 PE=1 SV=2	1	1	1	1	0	0	0	0	1	0	0	0	0	0	1	0	0	0	0	0	1	0	4	4	4	46.029	399	399	0.0069252	6.3665	0	0	0	0	4
sp|Q92526|TCPW_HUMAN	sp|Q92526|TCPW_HUMAN	1	650660	1	1	1	1	1	650660	1	1	1	1	sp|Q92526|TCPW_HUMAN T-complex protein 1 subunit zeta-2 OS=Homo sapiens GN=CCT6B PE=1 SV=5	1	1	1	1	0	0	0	0	1	0	0	0	0	0	1	0	0	0	0	0	1	0	2.3	2.3	2.3	57.821	530	530	0.0094086	6.1466	0	0	0	0	2.3
tr|J3QRI7|J3QRI7_HUMAN;tr|J3QQQ9|J3QQQ9_HUMAN;tr|J3QQV1|J3QQV1_HUMAN;tr|J3QRC4|J3QRC4_HUMAN;sp|P61254|RL26_HUMAN;tr|J3KTJ8|J3KTJ8_HUMAN;tr|J3KSS0|J3KSS0_HUMAN;tr|J3KS10|J3KS10_HUMAN	tr|J3QRI7|J3QRI7_HUMAN;tr|J3QQQ9|J3QQQ9_HUMAN;tr|J3QQV1|J3QQV1_HUMAN;tr|J3QRC4|J3QRC4_HUMAN;sp|P61254|RL26_HUMAN;tr|J3KTJ8|J3KTJ8_HUMAN;tr|J3KSS0|J3KSS0_HUMAN	1	644070	1	1	1	1	1	644070	1	8;8;8;8;8;7;4;3	1;1;1;1;1;1;1;0	1;1;1;1;1;1;1;0	tr|J3QRI7|J3QRI7_HUMAN 60S ribosomal protein L26 (Fragment) OS=Homo sapiens GN=RPL26 PE=4 SV=1;tr|J3QQQ9|J3QQQ9_HUMAN Uncharacterized protein OS=Homo sapiens PE=4 SV=1;tr|J3QQV1|J3QQV1_HUMAN 60S ribosomal protein L26 OS=Homo sapiens GN=RPL26 PE=4 SV=1;tr|J	8	8	1	1	0	0	0	4	5	7	0	0	0	1	1	0	0	0	0	1	1	0	54.2	8.4	8.4	12.63	107	107;107;110;135;145;97;63;63	0.0056818	6.5144	0	0	0	35.5	45.8
sp|O60884|DNJA2_HUMAN	sp|O60884|DNJA2_HUMAN	1	612500	1	1	1	1	1	612500	1	1	1	1	sp|O60884|DNJA2_HUMAN DnaJ homolog subfamily A member 2 OS=Homo sapiens GN=DNAJA2 PE=1 SV=1	1	1	1	1	0	0	0	0	1	0	0	0	0	0	1	0	0	0	0	0	1	0	3.6	3.6	3.6	45.745	412	412	0.001626	8.7042	0	0	0	0	3.6
tr|E9PIB2|E9PIB2_HUMAN	tr|E9PIB2|E9PIB2_HUMAN	1	585630	1	1	1	1	1	585630	1	1	1	1	tr|E9PIB2|E9PIB2_HUMAN Gasdermin-D (Fragment) OS=Homo sapiens GN=GSDMD PE=1 SV=1	1	1	1	1	0	0	0	0	1	0	0	0	0	0	1	0	0	0	0	0	1	0	3.6	3.6	3.6	30.824	277	277	0.0082531	6.3344	0	0	0	0	3.6
tr|F8VPD4|F8VPD4_HUMAN;sp|P27708|PYR1_HUMAN	tr|F8VPD4|F8VPD4_HUMAN;sp|P27708|PYR1_HUMAN	1	549650	1	1	1	1	1	549650	1	1;1	1;1	1;1	tr|F8VPD4|F8VPD4_HUMAN CAD protein OS=Homo sapiens GN=CAD PE=1 SV=1;sp|P27708|PYR1_HUMAN CAD protein OS=Homo sapiens GN=CAD PE=1 SV=3	2	1	1	1	0	0	0	0	1	0	0	0	0	0	1	0	0	0	0	0	1	0	0.6	0.6	0.6	236.02	2162	2162;2225	0.0082645	6.3354	0	0	0	0	0.6
sp|P78362|SRPK2_HUMAN;tr|C9J2M4|C9J2M4_HUMAN;tr|C9JWF7|C9JWF7_HUMAN;tr|H7C5L6|H7C5L6_HUMAN	sp|P78362|SRPK2_HUMAN;tr|C9J2M4|C9J2M4_HUMAN;tr|C9JWF7|C9JWF7_HUMAN;tr|H7C5L6|H7C5L6_HUMAN	1	494120	1	1	1	1	1	494120	1	2;1;1;1	2;1;1;1	2;1;1;1	sp|P78362|SRPK2_HUMAN SRSF protein kinase 2 OS=Homo sapiens GN=SRPK2 PE=1 SV=3;tr|C9J2M4|C9J2M4_HUMAN SRSF protein kinase 2 (Fragment) OS=Homo sapiens GN=SRPK2 PE=1 SV=1;tr|C9JWF7|C9JWF7_HUMAN SRSF protein kinase 2 (Fragment) OS=Homo sapiens GN=SRPK2 PE=1	4	2	2	2	0	0	0	0	1	1	0	0	0	0	1	1	0	0	0	0	1	1	3.8	3.8	3.8	77.526	688	688;160;231;295	0	11.825	0	0	0	0	2
sp|P61160|ARP2_HUMAN;tr|B4E3F4|B4E3F4_HUMAN	sp|P61160|ARP2_HUMAN;tr|B4E3F4|B4E3F4_HUMAN	1	430920	1	1	1	1	1	430920	1	1;1	1;1	1;1	sp|P61160|ARP2_HUMAN Actin-related protein 2 OS=Homo sapiens GN=ACTR2 PE=1 SV=1;tr|B4E3F4|B4E3F4_HUMAN Integrin alpha-5 OS=Homo sapiens GN=ITGA5 PE=1 SV=1	2	1	1	1	1	0	0	0	1	0	1	0	0	0	1	0	1	0	0	0	1	0	3.6	3.6	3.6	44.76	394	394;583	0.0016129	8.3698	3.6	0	0	0	3.6
tr|D6RDJ3|D6RDJ3_HUMAN;tr|H0Y723|H0Y723_HUMAN;sp|O15160|RPAC1_HUMAN;tr|E7EQB9|E7EQB9_HUMAN	tr|D6RDJ3|D6RDJ3_HUMAN;tr|H0Y723|H0Y723_HUMAN;sp|O15160|RPAC1_HUMAN;tr|E7EQB9|E7EQB9_HUMAN	1	415560	1	1	1	1	1	415560	1	1;1;1;1	1;1;1;1	1;1;1;1	tr|D6RDJ3|D6RDJ3_HUMAN DNA-directed RNA polymerases I and III subunit RPAC1 (Fragment) OS=Homo sapiens GN=POLR1C PE=1 SV=1;tr|H0Y723|H0Y723_HUMAN DNA-directed RNA polymerases I and III subunit RPAC1 (Fragment) OS=Homo sapiens GN=POLR1C PE=1 SV=1;sp|O15160|	4	1	1	1	0	0	0	0	1	0	0	0	0	0	1	0	0	0	0	0	1	0	10.5	10.5	10.5	14.205	124	124;140;346;588	0.0094595	6.2077	0	0	0	0	10.5
tr|H3BSQ5|H3BSQ5_HUMAN;tr|H3BUE3|H3BUE3_HUMAN;tr|H3BSK9|H3BSK9_HUMAN;tr|H3BUF6|H3BUF6_HUMAN;sp|Q8WWM7|ATX2L_HUMAN	tr|H3BSQ5|H3BSQ5_HUMAN;tr|H3BUE3|H3BUE3_HUMAN;tr|H3BSK9|H3BSK9_HUMAN;tr|H3BUF6|H3BUF6_HUMAN;sp|Q8WWM7|ATX2L_HUMAN	1	387960	1	1	1	1	1	387960	1	1;1;1;1;1	1;1;1;1;1	1;1;1;1;1	tr|H3BSQ5|H3BSQ5_HUMAN Ataxin-2-like protein (Fragment) OS=Homo sapiens GN=ATXN2L PE=1 SV=1;tr|H3BUE3|H3BUE3_HUMAN Ataxin-2-like protein (Fragment) OS=Homo sapiens GN=ATXN2L PE=1 SV=1;tr|H3BSK9|H3BSK9_HUMAN Ataxin-2-like protein (Fragment) OS=Homo sapiens	5	1	1	1	0	0	0	0	1	0	0	0	0	0	1	0	0	0	0	0	1	0	11	11	11	10.113	91	91;217;336;1068;1075	0.005772	6.5652	0	0	0	0	11
tr|H0YMZ1|H0YMZ1_HUMAN;sp|P25789|PSA4_HUMAN;tr|H0YL69|H0YL69_HUMAN;tr|H0YN18|H0YN18_HUMAN;tr|H0YMI6|H0YMI6_HUMAN;tr|H0YMA1|H0YMA1_HUMAN;tr|H0YKT8|H0YKT8_HUMAN;tr|H0YLC2|H0YLC2_HUMAN;tr|H0YKS0|H0YKS0_HUMAN;tr|H0YLS6|H0YLS6_HUMAN;tr|H0YMV3|H0YMV3_HUMAN	tr|H0YMZ1|H0YMZ1_HUMAN;sp|P25789|PSA4_HUMAN;tr|H0YL69|H0YL69_HUMAN;tr|H0YN18|H0YN18_HUMAN;tr|H0YMI6|H0YMI6_HUMAN;tr|H0YMA1|H0YMA1_HUMAN;tr|H0YKT8|H0YKT8_HUMAN;tr|H0YLC2|H0YLC2_HUMAN	3.81669	1	1	14909000	1	1	56903000	1	1	6;6;6;5;4;4;3;3;2;2;1	6;6;6;5;4;4;3;3;2;2;1	6;6;6;5;4;4;3;3;2;2;1	tr|H0YMZ1|H0YMZ1_HUMAN Proteasome subunit alpha type (Fragment) OS=Homo sapiens GN=PSMA4 PE=1 SV=5;sp|P25789|PSA4_HUMAN Proteasome subunit alpha type-4 OS=Homo sapiens GN=PSMA4 PE=1 SV=1;tr|H0YL69|H0YL69_HUMAN Proteasome subunit alpha type (Fragment) OS=Ho	11	6	6	6	4	1	2	4	1	0	4	1	2	4	1	0	4	1	2	4	1	0	22.2	22.2	22.2	24.583	221	221;261;511;230;183;209;182;414;122;125;86	0	37.11	16.3	4.5	8.1	18.1	3.6
sp|Q16514|TAF12_HUMAN	sp|Q16514|TAF12_HUMAN	1.00271	1	1	24700000	1	1	24767000	1	1	4	4	4	sp|Q16514|TAF12_HUMAN Transcription initiation factor TFIID subunit 12 OS=Homo sapiens GN=TAF12 PE=1 SV=1	1	4	4	4	2	1	0	4	0	0	2	1	0	4	0	0	2	1	0	4	0	0	22.4	22.4	22.4	17.924	161	161	0	24.299	11.8	5	0	22.4	0
sp|Q96IM9|DYDC2_HUMAN;tr|H7C4K4|H7C4K4_HUMAN	sp|Q96IM9|DYDC2_HUMAN;tr|H7C4K4|H7C4K4_HUMAN	21090000	1	1	1	1	1	21090000	1	1	2;1	2;1	2;1	sp|Q96IM9|DYDC2_HUMAN DPY30 domain-containing protein 2 OS=Homo sapiens GN=DYDC2 PE=2 SV=1;tr|H7C4K4|H7C4K4_HUMAN Hereditary hemochromatosis protein (Fragment) OS=Homo sapiens GN=HFE PE=4 SV=1	2	2	2	2	1	1	0	2	1	1	1	1	0	2	1	1	1	1	0	2	1	1	0	0	0	5898.6	51708	51708;4595	0	11.631	0	0	0	0	0
tr|A0A087X0P6|A0A087X0P6_HUMAN;tr|A0A075B6S2|A0A075B6S2_HUMAN;tr|A0A0A0MRZ7|A0A0A0MRZ7_HUMAN;tr|A0A0A0MTQ6|A0A0A0MTQ6_HUMAN;tr|A0A087X0Q4|A0A087X0Q4_HUMAN;tr|A0A087WW87|A0A087WW87_HUMAN;tr|A0A075B6R1|A0A075B6R1_HUMAN;sp|P01617|KV204_HUMAN;sp|P01614|KV201_HUMAN;sp|P06309|KV205_HUMAN;tr|A0A075B6S6|A0A075B6S6_HUMAN;tr|A0A075B6S3|A0A075B6S3_HUMAN;tr|A0A0C4DH68|A0A0C4DH68_HUMAN;tr|A0A075B6R9|A0A075B6R…	tr|A0A087X0P6|A0A087X0P6_HUMAN;tr|A0A075B6S2|A0A075B6S2_HUMAN;tr|A0A0A0MRZ7|A0A0A0MRZ7_HUMAN;tr|A0A0A0MTQ6|A0A0A0MTQ6_HUMAN;tr|A0A087X0Q4|A0A087X0Q4_HUMAN;tr|A0A087WW87|A0A087WW87_HUMAN;tr|A0A075B6R1|A0A075B6R1_HUMAN;sp|P01617|KV204_HUMAN;sp|P01614|KV201_HUMAN;sp|P06309|KV205_HUMAN;tr|A0A075B6S6|A0A075B6S6_HUMAN;tr|A0A075B6S3|A0A075B6S3_HUMAN;tr|A0A0C4DH68|A0A0C4DH68_HUMAN;tr|A0A075B6R9|A0A075B6R…	20334000	1	1	1	1	1	20334000	1	1	2;2;2;1;1;1;1;1;1;1;1;1;1;1;1;1	2;2;2;1;1;1;1;1;1;1;1;1;1;1;1;1	2;2;2;1;1;1;1;1;1;1;1;1;1;1;1;1	tr|A0A087X0P6|A0A087X0P6_HUMAN Protein IGKV2D-29 OS=Homo sapiens GN=IGKV2D-29 PE=1 SV=1;tr|A0A075B6S2|A0A075B6S2_HUMAN Protein IGKV2D-29 (Fragment) OS=Homo sapiens GN=IGKV2D-29 PE=1 SV=1;tr|A0A0A0MRZ7|A0A0A0MRZ7_HUMAN Protein IGKV2D-26 (Fragment) OS=Homo s	16	2	2	2	0	1	0	2	1	1	0	1	0	2	1	1	0	1	0	2	1	1	19.6	19.6	19.6	11.192	102	102;120;367;102;104;105;111;113;115;117;120;120;120;120;133;623	0	19.636	0	12.7	0	19.6	12.7
sp|P09012|SNRPA_HUMAN;tr|M0R221|M0R221_HUMAN;tr|M0R2B8|M0R2B8_HUMAN;tr|M0QZG7|M0QZG7_HUMAN;tr|M0R268|M0R268_HUMAN;tr|M0R0G9|M0R0G9_HUMAN;tr|M0QXK2|M0QXK2_HUMAN	sp|P09012|SNRPA_HUMAN;tr|M0R221|M0R221_HUMAN;tr|M0R2B8|M0R2B8_HUMAN;tr|M0QZG7|M0QZG7_HUMAN;tr|M0R268|M0R268_HUMAN;tr|M0R0G9|M0R0G9_HUMAN;tr|M0QXK2|M0QXK2_HUMAN	1.12388	8.99119e-08	1	15927000	11122000	1	17900000	1	1	6;4;4;4;4;3;3	6;4;4;4;4;3;3	4;3;3;3;2;2;2	sp|P09012|SNRPA_HUMAN U1 small nuclear ribonucleoprotein A OS=Homo sapiens GN=SNRPA PE=1 SV=3;tr|M0R221|M0R221_HUMAN U1 small nuclear ribonucleoprotein A (Fragment) OS=Homo sapiens GN=SNRPA PE=1 SV=1;tr|M0R2B8|M0R2B8_HUMAN U1 small nuclear ribonucleoprotei	7	6	6	4	4	2	0	4	3	3	4	2	0	4	3	3	2	1	0	2	2	3	30.9	30.9	25.5	31.279	282	282;142;148;184;256;87;129	0	38.236	15.6	9.6	0	15.6	18.1
sp|P23458|JAK1_HUMAN	sp|P23458|JAK1_HUMAN	0.890548	1	1	19963000	1	1	17778000	1	1	9	9	9	sp|P23458|JAK1_HUMAN Tyrosine-protein kinase JAK1 OS=Homo sapiens GN=JAK1 PE=1 SV=2	1	9	9	9	8	0	0	9	1	2	8	0	0	9	1	2	8	0	0	9	1	2	9.4	9.4	9.4	133.28	1154	1154	0	60.865	8.7	0	0	9.4	1.4
tr|A0A087WV05|A0A087WV05_HUMAN;sp|Q99417|MYCBP_HUMAN;tr|A0A0D9SEI7|A0A0D9SEI7_HUMAN	tr|A0A087WV05|A0A087WV05_HUMAN;sp|Q99417|MYCBP_HUMAN	0.644756	1	1	21740000	1	1	14017000	1	1	7;7;1	7;7;1	7;7;1	tr|A0A087WV05|A0A087WV05_HUMAN Uncharacterized protein OS=Homo sapiens PE=4 SV=1;sp|Q99417|MYCBP_HUMAN C-Myc-binding protein OS=Homo sapiens GN=MYCBP PE=1 SV=3	3	7	7	7	6	0	1	4	1	0	6	0	1	4	1	0	6	0	1	4	1	0	69.1	69.1	69.1	12.755	110	110;103;56	0	52.012	59.1	0	8.2	35.5	18.2
sp|Q9UPS8|ANR26_HUMAN;tr|E7ESJ3|E7ESJ3_HUMAN	sp|Q9UPS8|ANR26_HUMAN;tr|E7ESJ3|E7ESJ3_HUMAN	13366000	1	1	1	1	1	13366000	1	1	1;1	1;1	1;1	sp|Q9UPS8|ANR26_HUMAN Ankyrin repeat domain-containing protein 26 OS=Homo sapiens GN=ANKRD26 PE=1 SV=3;tr|E7ESJ3|E7ESJ3_HUMAN Ankyrin repeat domain-containing protein 26 OS=Homo sapiens GN=ANKRD26 PE=1 SV=1	2	1	1	1	0	0	0	1	0	0	0	0	0	1	0	0	0	0	0	1	0	0	0.8	0.8	0.8	196.32	1709	1709;1726	0.0082305	6.3126	0	0	0	0.8	0
sp|P01040|CYTA_HUMAN;tr|C9J0E4|C9J0E4_HUMAN	sp|P01040|CYTA_HUMAN;tr|C9J0E4|C9J0E4_HUMAN	12162000	1.47462e-07	1	1	6781400	1	12162000	1	1	4;3	4;3	4;3	sp|P01040|CYTA_HUMAN Cystatin-A OS=Homo sapiens GN=CSTA PE=1 SV=1;tr|C9J0E4|C9J0E4_HUMAN Cystatin-A OS=Homo sapiens GN=CSTA PE=1 SV=1	2	4	4	4	1	3	1	3	0	0	1	3	1	3	0	0	1	3	1	3	0	0	52	52	52	11.006	98	98;63	0	24.806	12.2	52	18.4	42.9	0
sp|O94776|MTA2_HUMAN;tr|E9PCS8|E9PCS8_HUMAN;tr|E7EQY4|E7EQY4_HUMAN;tr|E7EV10|E7EV10_HUMAN;sp|Q9BTC8|MTA3_HUMAN;tr|B4DYT9|B4DYT9_HUMAN	sp|O94776|MTA2_HUMAN	0.95437	1	1	12448000	1	1	11880000	1	1	8;1;1;1;1;1	8;1;1;1;1;1	7;0;0;0;0;0	sp|O94776|MTA2_HUMAN Metastasis-associated protein MTA2 OS=Homo sapiens GN=MTA2 PE=1 SV=1	6	8	8	7	4	1	0	5	3	0	4	1	0	5	3	0	3	0	0	4	3	0	15.6	15.6	14.1	75.022	668	668;392;514;590;594;1070	0	50.823	6.6	1.5	0	9.3	7.3
sp|Q9H3K6|BOLA2_HUMAN;tr|H3BV85|H3BV85_HUMAN;tr|H3BTW0|H3BTW0_HUMAN;tr|A0A0B4J295|A0A0B4J295_HUMAN;tr|H3BVE0|H3BVE0_HUMAN	sp|Q9H3K6|BOLA2_HUMAN;tr|H3BV85|H3BV85_HUMAN;tr|H3BTW0|H3BTW0_HUMAN;tr|A0A0B4J295|A0A0B4J295_HUMAN;tr|H3BVE0|H3BVE0_HUMAN	0.527451	1	1	21001000	1	1	11077000	1	1	5;3;3;3;3	5;3;3;3;3	5;3;3;3;3	sp|Q9H3K6|BOLA2_HUMAN BolA-like protein 2 OS=Homo sapiens GN=BOLA2 PE=1 SV=1;tr|H3BV85|H3BV85_HUMAN BolA-like protein 2 (Fragment) OS=Homo sapiens GN=BOLA2B PE=1 SV=1;tr|H3BTW0|H3BTW0_HUMAN Uncharacterized protein (Fragment) OS=Homo sapiens PE=3 SV=1;tr|A0	5	5	5	5	5	1	0	4	0	0	5	1	0	4	0	0	5	1	0	4	0	0	58.1	58.1	58.1	10.116	86	86;88;89;124;249	0	47.226	58.1	18.6	0	47.7	0
sp|P35579|MYH9_HUMAN;tr|Q5BKV1|Q5BKV1_HUMAN	sp|P35579|MYH9_HUMAN	0.633367	1	1	16717000	1	1	10588000	1	1	17;1	13;1	12;1	sp|P35579|MYH9_HUMAN Myosin-9 OS=Homo sapiens GN=MYH9 PE=1 SV=4	2	17	13	12	16	1	1	5	2	3	12	0	0	4	1	1	12	0	0	4	0	0	11.5	9	8.2	226.53	1960	1960;218	0	84.819	10.7	0.6	0.6	3.1	1.4
tr|F8W1R7|F8W1R7_HUMAN;sp|P60660|MYL6_HUMAN;tr|J3KND3|J3KND3_HUMAN;tr|G8JLA2|G8JLA2_HUMAN;tr|G3V1V0|G3V1V0_HUMAN;tr|B7Z6Z4|B7Z6Z4_HUMAN;tr|G3V1Y7|G3V1Y7_HUMAN;tr|F8VPF3|F8VPF3_HUMAN;tr|F8W180|F8W180_HUMAN;tr|F8VZU9|F8VZU9_HUMAN;tr|F8VXL3|F8VXL3_HUMAN;tr|H0YI43|H0YI43_HUMAN;tr|F8W1I5|F8W1I5_HUMAN;sp|P14649|MYL6B_HUMAN	tr|F8W1R7|F8W1R7_HUMAN;sp|P60660|MYL6_HUMAN;tr|J3KND3|J3KND3_HUMAN;tr|G8JLA2|G8JLA2_HUMAN;tr|G3V1V0|G3V1V0_HUMAN;tr|B7Z6Z4|B7Z6Z4_HUMAN;tr|G3V1Y7|G3V1Y7_HUMAN;tr|F8VPF3|F8VPF3_HUMAN;tr|F8W180|F8W180_HUMAN;tr|F8VZU9|F8VZU9_HUMAN	0.939392	1	1	10464000	1	1	9829800	1	1	4;4;4;4;4;4;3;3;2;2;1;1;1;1	4;4;4;4;4;4;3;3;2;2;1;1;1;1	4;4;4;4;4;4;3;3;2;2;1;1;1;1	tr|F8W1R7|F8W1R7_HUMAN Myosin light polypeptide 6 OS=Homo sapiens GN=MYL6 PE=1 SV=1;sp|P60660|MYL6_HUMAN Myosin light polypeptide 6 OS=Homo sapiens GN=MYL6 PE=1 SV=2;tr|J3KND3|J3KND3_HUMAN Myosin light polypeptide 6 OS=Homo sapiens GN=MYL6 PE=1 SV=1;tr|G8J	14	4	4	4	4	0	0	2	1	0	4	0	0	2	1	0	4	0	0	2	1	0	31	31	31	16.29	145	145;151;152;152;161;238;115;130;196;523;47;83;175;208	0	28.424	31	0	0	16.6	10.3
tr|A0A0A0MRQ5|A0A0A0MRQ5_HUMAN;tr|A0A0A0MSI0|A0A0A0MSI0_HUMAN;sp|Q06830|PRDX1_HUMAN;sp|Q13162|PRDX4_HUMAN;tr|H7C3T4|H7C3T4_HUMAN;sp|P32119|PRDX2_HUMAN	tr|A0A0A0MRQ5|A0A0A0MRQ5_HUMAN;tr|A0A0A0MSI0|A0A0A0MSI0_HUMAN;sp|Q06830|PRDX1_HUMAN	0.871942	1	1	10963000	1	1	9559100	1	1	3;3;3;1;1;1	3;3;3;1;1;1	3;3;3;1;1;1	tr|A0A0A0MRQ5|A0A0A0MRQ5_HUMAN Peroxiredoxin-1 OS=Homo sapiens GN=PRDX1 PE=1 SV=1;tr|A0A0A0MSI0|A0A0A0MSI0_HUMAN Peroxiredoxin-1 (Fragment) OS=Homo sapiens GN=PRDX1 PE=1 SV=1;sp|Q06830|PRDX1_HUMAN Peroxiredoxin-1 OS=Homo sapiens GN=PRDX1 PE=1 SV=1	6	3	3	3	2	1	0	2	2	0	2	1	0	2	2	0	2	1	0	2	2	0	34	34	34	10.676	97	97;171;199;271;374;857	0	19.991	21.6	11.3	0	21.6	22.7
tr|Q5HY54|Q5HY54_HUMAN;sp|P21333|FLNA_HUMAN;tr|Q60FE5|Q60FE5_HUMAN;tr|A0A087WWY3|A0A087WWY3_HUMAN;tr|F8WE98|F8WE98_HUMAN;tr|H0Y5F3|H0Y5F3_HUMAN;tr|H0Y5C6|H0Y5C6_HUMAN;sp|O75369|FLNB_HUMAN	tr|Q5HY54|Q5HY54_HUMAN;sp|P21333|FLNA_HUMAN;tr|Q60FE5|Q60FE5_HUMAN;tr|A0A087WWY3|A0A087WWY3_HUMAN	0.348439	1	1	27224000	1	1	9485900	1	1	21;21;21;20;5;2;1;1	21;21;21;20;5;2;1;1	20;20;20;19;4;2;1;0	tr|Q5HY54|Q5HY54_HUMAN Filamin-A OS=Homo sapiens GN=FLNA PE=1 SV=1;sp|P21333|FLNA_HUMAN Filamin-A OS=Homo sapiens GN=FLNA PE=1 SV=4;tr|Q60FE5|Q60FE5_HUMAN Filamin A OS=Homo sapiens GN=FLNA PE=1 SV=1;tr|A0A087WWY3|A0A087WWY3_HUMAN Filamin-A OS=Homo sapiens	8	21	21	20	18	2	0	5	0	0	18	2	0	5	0	0	17	2	0	5	0	0	12.1	12.1	11.7	276.55	2607	2607;2647;2773;2315;604;232;281;2602	0	137.41	10.2	1.5	0	3.6	0
tr|F5H6E2|F5H6E2_HUMAN;sp|O00159|MYO1C_HUMAN;tr|I3L501|I3L501_HUMAN;tr|I3L3Y6|I3L3Y6_HUMAN;tr|I3L204|I3L204_HUMAN;tr|I3L4D4|I3L4D4_HUMAN	tr|F5H6E2|F5H6E2_HUMAN;sp|O00159|MYO1C_HUMAN	9414900	1	1	1	1	1	9414900	1	1	8;8;1;1;1;1	8;8;1;1;1;1	8;8;1;1;1;1	tr|F5H6E2|F5H6E2_HUMAN Unconventional myosin-Ic OS=Homo sapiens GN=MYO1C PE=1 SV=1;sp|O00159|MYO1C_HUMAN Unconventional myosin-Ic OS=Homo sapiens GN=MYO1C PE=1 SV=4	6	8	8	8	2	0	0	6	2	1	2	0	0	6	2	1	2	0	0	6	2	1	10.9	10.9	10.9	118.99	1039	1039;1063;169;170;267;360	0	48.749	2.7	0	0	8.5	3.2
tr|H3BRU6|H3BRU6_HUMAN;tr|F8VZX2|F8VZX2_HUMAN;sp|Q15366|PCBP2_HUMAN;tr|F8W0G4|F8W0G4_HUMAN;tr|F8VXH9|F8VXH9_HUMAN;tr|H3BSS4|H3BSS4_HUMAN;tr|F8W1G6|F8W1G6_HUMAN;tr|F8VRH0|F8VRH0_HUMAN	tr|H3BRU6|H3BRU6_HUMAN;tr|F8VZX2|F8VZX2_HUMAN;sp|Q15366|PCBP2_HUMAN;tr|F8W0G4|F8W0G4_HUMAN;tr|F8VXH9|F8VXH9_HUMAN	8790400	1	1	1	1	1	8790400	1	1	3;3;3;2;2;1;1;1	2;2;2;1;1;1;1;1	2;2;2;1;1;1;1;1	tr|H3BRU6|H3BRU6_HUMAN Poly(rC)-binding protein 2 (Fragment) OS=Homo sapiens GN=PCBP2 PE=1 SV=1;tr|F8VZX2|F8VZX2_HUMAN Poly(rC)-binding protein 2 OS=Homo sapiens GN=PCBP2 PE=1 SV=1;sp|Q15366|PCBP2_HUMAN Poly(rC)-binding protein 2 OS=Homo sapiens GN=PCBP2 P	8	3	2	2	2	1	1	3	2	2	1	1	1	2	1	1	1	1	1	2	1	1	14.6	8	8	31.6	301	301;321;365;158;160;184;202;469	0	12.762	11	4.3	4.3	14.6	11
sp|O43707|ACTN4_HUMAN;sp|Q01718|ACTHR_HUMAN;tr|H3BPX1|H3BPX1_HUMAN;tr|F8WET3|F8WET3_HUMAN;tr|H0Y5K5|H0Y5K5_HUMAN;tr|E9PL61|E9PL61_HUMAN;tr|E9PQ03|E9PQ03_HUMAN;tr|C9J613|C9J613_HUMAN;tr|C9JY72|C9JY72_HUMAN;tr|C9JQU9|C9JQU9_HUMAN;sp|Q562R1|ACTBL_HUMAN;tr|F5GXS2|F5GXS2_HUMAN;tr|H7C144|H7C144_HUMAN;tr|D6RA67|D6RA67_HUMAN;sp|P12814|ACTN1_HUMAN;tr|H9KV75|H9KV75_HUMAN;tr|G3V2X9|G3V2X9_HUMAN;tr|A0A087WSZ…	sp|O43707|ACTN4_HUMAN;sp|Q01718|ACTHR_HUMAN;tr|H3BPX1|H3BPX1_HUMAN	8417200	1	1	1	1	1	8417200	1	1	21;13;12;8;8;8;8;8;8;7;5;4;3;3;2;2;1;1;1;1;1;1;1;1;1;1;1;1	6;0;0;0;0;0;0;0;0;0;0;4;3;0;2;2;1;1;1;1;1;1;1;1;1;1;1;1	6;0;0;0;0;0;0;0;0;0;0;4;3;0;2;2;1;1;1;1;1;1;1;1;1;1;1;1	sp|O43707|ACTN4_HUMAN Alpha-actinin-4 OS=Homo sapiens GN=ACTN4 PE=1 SV=2;sp|Q01718|ACTHR_HUMAN Adrenocorticotropic hormone receptor OS=Homo sapiens GN=MC2R PE=1 SV=1;tr|H3BPX1|H3BPX1_HUMAN Cytochrome b-245 light chain (Fragment) OS=Homo sapiens GN=CYBA PE=	28	21	6	6	10	9	7	15	11	11	1	0	0	6	0	0	1	0	0	6	0	0	16.3	6.7	6.7	153.41	1366	1366;757;479;317;588;215;234;509;401;337;376;521;342;262;892;822;144;1233;901;894;297;207;238;251;453;261;126;85	0	53.944	8.1	6.7	4.2	13.5	7.4
sp|O15294|OGT1_HUMAN	sp|O15294|OGT1_HUMAN	1.4575	1	1	5746400	1	1	8375400	1	1	6	6	6	sp|O15294|OGT1_HUMAN UDP-N-acetylglucosamine--peptide N-acetylglucosaminyltransferase 110 kDa subunit OS=Homo sapiens GN=OGT PE=1 SV=3	1	6	6	6	3	1	0	6	1	1	3	1	0	6	1	1	3	1	0	6	1	1	7.5	7.5	7.5	116.92	1046	1046	0	43.775	4.4	1.9	0	7.5	1.9
sp|Q5VWN6|F208B_HUMAN	sp|Q5VWN6|F208B_HUMAN	0.776798	1	1	10732000	1	1	8336600	1	1	7	7	7	sp|Q5VWN6|F208B_HUMAN Protein FAM208B OS=Homo sapiens GN=FAM208B PE=1 SV=1	1	7	7	7	6	1	0	3	1	1	6	1	0	3	1	1	6	1	0	3	1	1	3.8	3.8	3.8	268.84	2430	2430	0	45.8	3.3	0.5	0	1.4	0.5
sp|Q5W0B1|RN219_HUMAN	sp|Q5W0B1|RN219_HUMAN	1.02319	1	1	7739300	1	1	7918800	1	1	7	7	7	sp|Q5W0B1|RN219_HUMAN RING finger protein 219 OS=Homo sapiens GN=RNF219 PE=1 SV=1	1	7	7	7	3	0	0	6	1	0	3	0	0	6	1	0	3	0	0	6	1	0	12.1	12.1	12.1	81.116	726	726	0	50.381	5	0	0	10.9	2.5
sp|Q9UQ35|SRRM2_HUMAN	sp|Q9UQ35|SRRM2_HUMAN	0.947569	1	1	7547100	1	1	7151400	1	1	4	4	4	sp|Q9UQ35|SRRM2_HUMAN Serine/arginine repetitive matrix protein 2 OS=Homo sapiens GN=SRRM2 PE=1 SV=2	1	4	4	4	3	0	0	3	0	0	3	0	0	3	0	0	3	0	0	3	0	0	2	2	2	299.61	2752	2752	0	27.632	1.5	0	0	1.5	0
sp|Q6N021|TET2_HUMAN;tr|E7EQS8|E7EQS8_HUMAN	sp|Q6N021|TET2_HUMAN;tr|E7EQS8|E7EQS8_HUMAN	6873900	1	1	1	1	1	6873900	1	1	4;4	4;4	4;4	sp|Q6N021|TET2_HUMAN Methylcytosine dioxygenase TET2 OS=Homo sapiens GN=TET2 PE=1 SV=3;tr|E7EQS8|E7EQS8_HUMAN Methylcytosine dioxygenase TET2 OS=Homo sapiens GN=TET2 PE=1 SV=1	2	4	4	4	2	0	0	3	0	0	2	0	0	3	0	0	2	0	0	3	0	0	2.5	2.5	2.5	223.81	2002	2002;2023	0	23.919	1.2	0	0	2.1	0
sp|P49848|TAF6_HUMAN;tr|J3KR72|J3KR72_HUMAN;tr|C9JHQ8|C9JHQ8_HUMAN;tr|F8WEJ7|F8WEJ7_HUMAN;tr|E5RKA5|E5RKA5_HUMAN;tr|C9J7C4|C9J7C4_HUMAN;tr|C9JIS2|C9JIS2_HUMAN;tr|E5RHA1|E5RHA1_HUMAN;tr|C9J088|C9J088_HUMAN;tr|C9JFL8|C9JFL8_HUMAN;tr|C9JTY6|C9JTY6_HUMAN	sp|P49848|TAF6_HUMAN;tr|J3KR72|J3KR72_HUMAN	1.17661	1	1	4831000	1	1	5684200	1	1	4;4;1;1;1;1;1;1;1;1;1	4;4;1;1;1;1;1;1;1;1;1	4;4;1;1;1;1;1;1;1;1;1	sp|P49848|TAF6_HUMAN Transcription initiation factor TFIID subunit 6 OS=Homo sapiens GN=TAF6 PE=1 SV=1;tr|J3KR72|J3KR72_HUMAN Transcription initiation factor TFIID subunit 6 OS=Homo sapiens GN=TAF6 PE=1 SV=1	11	4	4	4	3	0	1	3	0	0	3	0	1	3	0	0	3	0	1	3	0	0	7.4	7.4	7.4	72.668	677	677;734;76;114;114;114;134;141;156;233;255	0	23.553	5.8	0	1.9	5	0
tr|F8VQ14|F8VQ14_HUMAN;sp|P78371|TCPB_HUMAN;tr|F5GWF6|F5GWF6_HUMAN	tr|F8VQ14|F8VQ14_HUMAN;sp|P78371|TCPB_HUMAN;tr|F5GWF6|F5GWF6_HUMAN	0.732292	1	1	7670300	1	1	5616900	1	1	3;3;3	3;3;3	3;3;3	tr|F8VQ14|F8VQ14_HUMAN T-complex protein 1 subunit beta OS=Homo sapiens GN=CCT2 PE=1 SV=1;sp|P78371|TCPB_HUMAN T-complex protein 1 subunit beta OS=Homo sapiens GN=CCT2 PE=1 SV=4;tr|F5GWF6|F5GWF6_HUMAN T-complex protein 1 subunit beta OS=Homo sapiens GN=CCT	3	3	3	3	3	1	0	3	1	1	3	1	0	3	1	1	3	1	0	3	1	1	9.6	9.6	9.6	44.812	416	416;535;902	0	21.375	9.6	2.9	0	9.6	2.9
CON__P34955	CON__P34955	1.57946	1	1	3470100	1	1	5480900	1	1	3	3	3		1	3	3	3	2	0	0	3	0	0	2	0	0	3	0	0	2	0	0	3	0	0	8.4	8.4	8.4	46.103	416	416	0	17.519	6	0	0	8.4	0
tr|A0A0A0MRM8|A0A0A0MRM8_HUMAN;tr|A0A0D9SGC1|A0A0D9SGC1_HUMAN;sp|Q9UM54|MYO6_HUMAN;tr|E7EW20|E7EW20_HUMAN	tr|A0A0A0MRM8|A0A0A0MRM8_HUMAN;tr|A0A0D9SGC1|A0A0D9SGC1_HUMAN;sp|Q9UM54|MYO6_HUMAN;tr|E7EW20|E7EW20_HUMAN	1.52857	1	1	3463700	1	1	5294500	1	1	5;4;4;4	5;4;4;4	5;4;4;4	tr|A0A0A0MRM8|A0A0A0MRM8_HUMAN Unconventional myosin-VI OS=Homo sapiens GN=MYO6 PE=1 SV=1;tr|A0A0D9SGC1|A0A0D9SGC1_HUMAN Unconventional myosin-VI OS=Homo sapiens GN=MYO6 PE=1 SV=1;sp|Q9UM54|MYO6_HUMAN Unconventional myosin-VI OS=Homo sapiens GN=MYO6 PE=1 S	4	5	5	5	2	0	0	4	1	0	2	0	0	4	1	0	2	0	0	4	1	0	5	5	5	145.01	1253	1253;1294;1294;1295	0	32.75	2.2	0	0	3.8	1.2
tr|F8WBR5|F8WBR5_HUMAN;tr|M0QZ52|M0QZ52_HUMAN;tr|G3V479|G3V479_HUMAN;sp|P62158|CALM_HUMAN;tr|H0Y7A7|H0Y7A7_HUMAN;tr|E7ETZ0|E7ETZ0_HUMAN;tr|E7EMB3|E7EMB3_HUMAN	tr|F8WBR5|F8WBR5_HUMAN;tr|M0QZ52|M0QZ52_HUMAN;tr|G3V479|G3V479_HUMAN;sp|P62158|CALM_HUMAN;tr|H0Y7A7|H0Y7A7_HUMAN;tr|E7ETZ0|E7ETZ0_HUMAN;tr|E7EMB3|E7EMB3_HUMAN	0.960969	1	1	5393200	1	1	5182700	1	1	2;2;2;2;2;1;1	2;2;2;2;2;1;1	2;2;2;2;2;1;1	tr|F8WBR5|F8WBR5_HUMAN Calmodulin OS=Homo sapiens GN=CALM2 PE=1 SV=1;tr|M0QZ52|M0QZ52_HUMAN Calmodulin OS=Homo sapiens GN=CALM3 PE=1 SV=1;tr|G3V479|G3V479_HUMAN Calmodulin OS=Homo sapiens GN=CALM1 PE=1 SV=1;sp|P62158|CALM_HUMAN Calmodulin OS=Homo sapiens G	7	2	2	2	2	1	0	2	1	1	2	1	0	2	1	1	2	1	0	2	1	1	46.2	46.2	46.2	7.372	65	65;83;83;149;187;150;196	0	21.88	46.2	20	0	46.2	20
sp|Q8WUA2|PPIL4_HUMAN	sp|Q8WUA2|PPIL4_HUMAN	0.700531	1	1	7348000	1	1	5147500	1	1	4	4	4	sp|Q8WUA2|PPIL4_HUMAN Peptidyl-prolyl cis-trans isomerase-like 4 OS=Homo sapiens GN=PPIL4 PE=1 SV=1	1	4	4	4	4	0	0	2	0	1	4	0	0	2	0	1	4	0	0	2	0	1	11.4	11.4	11.4	57.224	492	492	0	27.729	11.4	0	0	5.5	0
sp|P15924|DESP_HUMAN	sp|P15924|DESP_HUMAN	1.51255	1	1	3370400	1	1	5097900	1	1	7	7	7	sp|P15924|DESP_HUMAN Desmoplakin OS=Homo sapiens GN=DSP PE=1 SV=3	1	7	7	7	4	0	2	4	0	0	4	0	2	4	0	0	4	0	2	4	0	0	2.3	2.3	2.3	331.77	2871	2871	0	41.326	1.3	0	0.7	1.3	0
sp|Q16352|AINX_HUMAN;tr|A0A087WYG8|A0A087WYG8_HUMAN	sp|Q16352|AINX_HUMAN;tr|A0A087WYG8|A0A087WYG8_HUMAN	4503400	1	1	1	1	1	4503400	1	1	4;3	2;1	2;1	sp|Q16352|AINX_HUMAN Alpha-internexin OS=Homo sapiens GN=INA PE=1 SV=2;tr|A0A087WYG8|A0A087WYG8_HUMAN Alpha-internexin OS=Homo sapiens GN=INA PE=1 SV=1	2	4	2	2	1	1	1	4	0	1	0	0	0	2	0	1	0	0	0	2	0	1	6.8	3.4	3.4	55.39	499	499;496	0	11.911	1.8	1.8	1.8	6.8	0
sp|O43809|CPSF5_HUMAN;tr|H3BND3|H3BND3_HUMAN;tr|H3BV41|H3BV41_HUMAN	sp|O43809|CPSF5_HUMAN;tr|H3BND3|H3BND3_HUMAN	0.855785	1	1	5188100	1	1	4439900	1	1	3;2;1	3;2;1	3;2;1	sp|O43809|CPSF5_HUMAN Cleavage and polyadenylation specificity factor subunit 5 OS=Homo sapiens GN=NUDT21 PE=1 SV=1;tr|H3BND3|H3BND3_HUMAN Cleavage and polyadenylation-specificity factor subunit 5 (Fragment) OS=Homo sapiens GN=NUDT21 PE=1 SV=5	3	3	3	3	3	1	1	2	1	0	3	1	1	2	1	0	3	1	1	2	1	0	17.2	17.2	17.2	26.227	227	227;150;71	0	19.071	17.2	7.9	7.9	11.9	7.9
sp|Q9ULV0|MYO5B_HUMAN;tr|Q7Z7A5|Q7Z7A5_HUMAN;tr|A0A0A0MR36|A0A0A0MR36_HUMAN	sp|Q9ULV0|MYO5B_HUMAN;tr|Q7Z7A5|Q7Z7A5_HUMAN	1.0363	1	1	3630700	1	1	3762500	1	1	4;3;1	4;3;1	4;3;1	sp|Q9ULV0|MYO5B_HUMAN Unconventional myosin-Vb OS=Homo sapiens GN=MYO5B PE=1 SV=3;tr|Q7Z7A5|Q7Z7A5_HUMAN Myosin 5B OS=Homo sapiens GN=MYO5B PE=1 SV=1	3	4	4	4	4	0	0	3	0	0	4	0	0	3	0	0	4	0	0	3	0	0	3.1	3.1	3.1	213.67	1848	1848;720;965	0	27.742	3.1	0	0	2.2	0
sp|P46821|MAP1B_HUMAN	sp|P46821|MAP1B_HUMAN	0.765358	1	1	4318500	1	1	3305200	1	1	4	4	4	sp|P46821|MAP1B_HUMAN Microtubule-associated protein 1B OS=Homo sapiens GN=MAP1B PE=1 SV=2	1	4	4	4	4	0	0	2	0	0	4	0	0	2	0	0	4	0	0	2	0	0	2.1	2.1	2.1	270.63	2468	2468	0	27.035	2.1	0	0	1.2	0
sp|P62487|RPB7_HUMAN;tr|H0YEE4|H0YEE4_HUMAN;tr|E9PKH3|E9PKH3_HUMAN;tr|E9PIU7|E9PIU7_HUMAN	sp|P62487|RPB7_HUMAN	1.11736	1	1	2733400	1	1	3054200	1	1	3;1;1;1	3;1;1;1	3;1;1;1	sp|P62487|RPB7_HUMAN DNA-directed RNA polymerase II subunit RPB7 OS=Homo sapiens GN=POLR2G PE=1 SV=1	4	3	3	3	2	0	0	3	0	0	2	0	0	3	0	0	2	0	0	3	0	0	18.6	18.6	18.6	19.294	172	172;60;64;470	0	21.613	12.2	0	0	18.6	0
sp|O00303|EIF3F_HUMAN;tr|H0YDT6|H0YDT6_HUMAN;tr|A0A0D9SEZ9|A0A0D9SEZ9_HUMAN	sp|O00303|EIF3F_HUMAN	0.469167	1	1	6478500	1	1	3039500	1	1	3;1;1	3;1;1	3;1;1	sp|O00303|EIF3F_HUMAN Eukaryotic translation initiation factor 3 subunit F OS=Homo sapiens GN=EIF3F PE=1 SV=1	3	3	3	3	3	1	0	2	0	0	3	1	0	2	0	0	3	1	0	2	0	0	11.2	11.2	11.2	37.563	357	357;100;299	0	26.188	11.2	4.8	0	7.8	0
tr|A0A0C4DGB6|A0A0C4DGB6_HUMAN;CON__P02768-1;sp|P02768|ALBU_HUMAN;tr|B7WNR0|B7WNR0_HUMAN;tr|Q5BQ95|Q5BQ95_HUMAN;tr|A0A087WWT3|A0A087WWT3_HUMAN;tr|H7C013|H7C013_HUMAN	tr|A0A0C4DGB6|A0A0C4DGB6_HUMAN;CON__P02768-1;sp|P02768|ALBU_HUMAN;tr|B7WNR0|B7WNR0_HUMAN;tr|Q5BQ95|Q5BQ95_HUMAN;tr|A0A087WWT3|A0A087WWT3_HUMAN	2742300	1	1	1	1	1	2742300	1	1	5;5;5;4;4;3;2	1;1;1;1;1;1;1	1;1;1;1;1;1;1	tr|A0A0C4DGB6|A0A0C4DGB6_HUMAN Serum albumin OS=Homo sapiens GN=ALB PE=1 SV=1;;sp|P02768|ALBU_HUMAN Serum albumin OS=Homo sapiens GN=ALB PE=1 SV=2;tr|B7WNR0|B7WNR0_HUMAN Serum albumin OS=Homo sapiens GN=ALB PE=1 SV=1;tr|Q5BQ95|Q5BQ95_HUMAN Kallikrein 13 sp	7	5	1	1	5	4	4	5	4	2	1	1	1	1	0	0	1	1	1	1	0	0	6.5	1.7	1.7	69.226	604	604;609;1215;494;806;736;197	0.0014881	6.8466	6.5	5.3	5.3	6.5	4.8
sp|Q8NFH3|NUP43_HUMAN	sp|Q8NFH3|NUP43_HUMAN	0.584798	1	1	4528400	1	1	2648200	1	1	3	3	3	sp|Q8NFH3|NUP43_HUMAN Nucleoporin Nup43 OS=Homo sapiens GN=NUP43 PE=1 SV=1	1	3	3	3	3	0	0	2	0	0	3	0	0	2	0	0	3	0	0	2	0	0	10.8	10.8	10.8	42.15	380	380	0	19.712	10.8	0	0	8.2	0
sp|Q8N7H5|PAF1_HUMAN;tr|B4DGJ5|B4DGJ5_HUMAN	sp|Q8N7H5|PAF1_HUMAN;tr|B4DGJ5|B4DGJ5_HUMAN	2519000	1	1	1	1	1	2519000	1	1	2;1	2;1	2;1	sp|Q8N7H5|PAF1_HUMAN RNA polymerase II-associated factor 1 homolog OS=Homo sapiens GN=PAF1 PE=1 SV=2;tr|B4DGJ5|B4DGJ5_HUMAN RNA polymerase II-associated factor 1 homolog OS=Homo sapiens GN=PAF1 PE=1 SV=1	2	2	2	2	1	0	0	1	1	1	1	0	0	1	1	1	1	0	0	1	1	1	5.3	5.3	5.3	59.975	531	531;288	0	14.32	2.6	0	0	2.6	2.6
sp|P06702|S10A9_HUMAN	sp|P06702|S10A9_HUMAN	2491900	1	1	1	1	1	2491900	1	1	1	1	1	sp|P06702|S10A9_HUMAN Protein S100-A9 OS=Homo sapiens GN=S100A9 PE=1 SV=1	1	1	1	1	1	1	1	1	0	0	1	1	1	1	0	0	1	1	1	1	0	0	11.4	11.4	11.4	13.242	114	114	0.0015723	7.5082	11.4	11.4	11.4	11.4	0
sp|Q9P1Y5|CAMP3_HUMAN	sp|Q9P1Y5|CAMP3_HUMAN	0.759584	1	1	3182400	1	1	2417300	1	1	4	4	4	sp|Q9P1Y5|CAMP3_HUMAN Calmodulin-regulated spectrin-associated protein 3 OS=Homo sapiens GN=CAMSAP3 PE=1 SV=2	1	4	4	4	3	0	0	2	1	1	3	0	0	2	1	1	3	0	0	2	1	1	4.2	4.2	4.2	134.75	1249	1249	0	27.408	3	0	0	2.1	1.1
REV__tr|J3KSH0|J3KSH0_HUMAN;REV__tr|J3QRG8|J3QRG8_HUMAN;REV__tr|J3KT87|J3KT87_HUMAN;REV__tr|J3QLA7|J3QLA7_HUMAN;REV__tr|J3QLS1|J3QLS1_HUMAN;REV__tr|C9J555|C9J555_HUMAN;REV__tr|J3KSL3|J3KSL3_HUMAN;REV__tr|J3QS10|J3QS10_HUMAN;REV__sp|Q14849|STAR3_HUMAN;REV__tr|J3QLM1|J3QLM1_HUMAN	REV__tr|J3KSH0|J3KSH0_HUMAN;REV__tr|J3QRG8|J3QRG8_HUMAN;REV__tr|J3KT87|J3KT87_HUMAN;REV__tr|J3QLA7|J3QLA7_HUMAN;REV__tr|J3QLS1|J3QLS1_HUMAN;REV__tr|C9J555|C9J555_HUMAN;REV__tr|J3KSL3|J3KSL3_HUMAN;REV__tr|J3QS10|J3QS10_HUMAN;REV__sp|Q14849|STAR3_HUMAN;REV__tr|J3QLM1|J3QLM1_HUMAN	2354700	1	1	1	1	1	2354700	1	1	1;1;1;1;1;1;1;1;1;1	1;1;1;1;1;1;1;1;1;1	1;1;1;1;1;1;1;1;1;1	tr|J3KSH0|J3KSH0_HUMAN StAR-related lipid transfer protein 3 (Fragment) OS=Homo sapiens GN=STARD3 PE=1 SV=1;tr|J3QRG8|J3QRG8_HUMAN StAR-related lipid transfer protein 3 (Fragment) OS=Homo sapiens GN=STARD3 PE=1 SV=5;tr|J3KT87|J3KT87_HUMAN StAR-related lipi	10	1	1	1	0	0	1	1	0	0	0	0	1	1	0	0	0	0	1	1	0	0	0	0	0	12.821	111	111;118;119;157;162;196;261;262;445;475	0.0082759	6.3458	0	0	0	0	0
sp|Q9P219|DAPLE_HUMAN	sp|Q9P219|DAPLE_HUMAN	0.067922	1	1	31732000	1	1	2155300	1	1	15	15	15	sp|Q9P219|DAPLE_HUMAN Protein Daple OS=Homo sapiens GN=CCDC88C PE=1 SV=3	1	15	15	15	15	0	1	3	0	0	15	0	1	3	0	0	15	0	1	3	0	0	9.2	9.2	9.2	228.23	2028	2028	0	105.98	9.2	0	0.6	1.9	0
sp|Q15646|OASL_HUMAN	sp|Q15646|OASL_HUMAN	0.629662	1	1	3000500	1	1	1889300	1	1	2	2	2	sp|Q15646|OASL_HUMAN 2-5-oligoadenylate synthase-like protein OS=Homo sapiens GN=OASL PE=1 SV=2	1	2	2	2	2	0	0	2	0	1	2	0	0	2	0	1	2	0	0	2	0	1	1.8	1.8	1.8	116.67	1042	1042	0	11.946	1.8	0	0	1.8	0
sp|P78527|PRKDC_HUMAN	sp|P78527|PRKDC_HUMAN	1805300	1	1	1	1	1	1805300	1	1	3	3	3	sp|P78527|PRKDC_HUMAN DNA-dependent protein kinase catalytic subunit OS=Homo sapiens GN=PRKDC PE=1 SV=3	1	3	3	3	1	0	0	2	0	0	1	0	0	2	0	0	1	0	0	2	0	0	0.8	0.8	0.8	469.08	4128	4128	0	17.108	0.3	0	0	0.5	0
CON__P05787	CON__P05787	1777200	1	1	1	1	1	1777200	1	1	16	1	1		1	16	1	1	7	7	4	15	7	6	0	0	0	1	0	0	0	0	0	1	0	0	27.3	2.3	2.3	53.704	483	483	1	-2	9.3	7.2	3.9	25.9	14.7
tr|C9J406|C9J406_HUMAN;tr|B9A067|B9A067_HUMAN;sp|Q16891|MIC60_HUMAN;tr|H7C463|H7C463_HUMAN	tr|C9J406|C9J406_HUMAN;tr|B9A067|B9A067_HUMAN;sp|Q16891|MIC60_HUMAN;tr|H7C463|H7C463_HUMAN	1696800	1	1	1	1	1	1696800	1	1	1;1;1;1	1;1;1;1	1;1;1;1	tr|C9J406|C9J406_HUMAN MICOS complex subunit MIC60 OS=Homo sapiens GN=IMMT PE=1 SV=1;tr|B9A067|B9A067_HUMAN MICOS complex subunit MIC60 OS=Homo sapiens GN=IMMT PE=1 SV=2;sp|Q16891|MIC60_HUMAN MICOS complex subunit MIC60 OS=Homo sapiens GN=IMMT PE=1 SV=1;tr	4	1	1	1	0	0	0	1	0	0	0	0	0	1	0	0	0	0	0	1	0	0	2.6	2.6	2.6	73.253	659	659;711;758;946	0.0015528	7.3005	0	0	0	2.6	0
tr|C9JR56|C9JR56_HUMAN;sp|Q9UPW6|SATB2_HUMAN;sp|Q01826|SATB1_HUMAN	tr|C9JR56|C9JR56_HUMAN;sp|Q9UPW6|SATB2_HUMAN;sp|Q01826|SATB1_HUMAN	1665600	1	1	1	1	1	1665600	1	1	2;2;1	2;2;1	2;2;1	tr|C9JR56|C9JR56_HUMAN DNA-binding protein SATB OS=Homo sapiens GN=SATB2 PE=1 SV=1;sp|Q9UPW6|SATB2_HUMAN DNA-binding protein SATB2 OS=Homo sapiens GN=SATB2 PE=1 SV=2;sp|Q01826|SATB1_HUMAN DNA-binding protein SATB1 OS=Homo sapiens GN=SATB1 PE=1 SV=1	3	2	2	2	0	0	0	2	0	0	0	0	0	2	0	0	0	0	0	2	0	0	4.9	4.9	4.9	76.034	674	674;733;763	0	13.977	0	0	0	4.9	0
sp|O75607|NPM3_HUMAN	sp|O75607|NPM3_HUMAN	1614600	1	1	1	1	1	1614600	1	1	1	1	1	sp|O75607|NPM3_HUMAN Nucleoplasmin-3 OS=Homo sapiens GN=NPM3 PE=1 SV=3	1	1	1	1	1	0	1	1	0	0	1	0	1	1	0	0	1	0	1	1	0	0	9	9	9	19.343	178	178	0	31.814	9	0	9	9	0
tr|A0A075B730|A0A075B730_HUMAN;tr|A0A087X1U6|A0A087X1U6_HUMAN;sp|P58107|EPIPL_HUMAN	tr|A0A075B730|A0A075B730_HUMAN;tr|A0A087X1U6|A0A087X1U6_HUMAN;sp|P58107|EPIPL_HUMAN	1589800	1	1	1	1	1	1589800	1	1	3;3;3	2;2;2	2;2;2	tr|A0A075B730|A0A075B730_HUMAN Epiplakin OS=Homo sapiens GN=EPPK1 PE=1 SV=2;tr|A0A087X1U6|A0A087X1U6_HUMAN Epiplakin OS=Homo sapiens GN=EPPK1 PE=1 SV=1;sp|P58107|EPIPL_HUMAN Epiplakin OS=Homo sapiens GN=EPPK1 PE=1 SV=2	3	3	2	2	1	0	1	1	0	0	0	0	1	1	0	0	0	0	1	1	0	0	2.9	0.3	0.3	553.12	5063	5063;5088;5090	0	11.151	2.6	0	0.1	0.2	0
sp|P17302|CXA1_HUMAN	sp|P17302|CXA1_HUMAN	1446800	1	1	1	1	1	1446800	1	1	1	1	1	sp|P17302|CXA1_HUMAN Gap junction alpha-1 protein OS=Homo sapiens GN=GJA1 PE=1 SV=2	1	1	1	1	0	0	0	1	0	0	0	0	0	1	0	0	0	0	0	1	0	0	3.7	3.7	3.7	43.008	382	382	0.0056417	6.4389	0	0	0	3.7	0
tr|F5GWG3|F5GWG3_HUMAN;sp|Q8NFJ5|RAI3_HUMAN	tr|F5GWG3|F5GWG3_HUMAN;sp|Q8NFJ5|RAI3_HUMAN	1308500	1	1	1	1	1	1308500	1	1	1;1	1;1	1;1	tr|F5GWG3|F5GWG3_HUMAN Retinoic acid-induced protein 3 (Fragment) OS=Homo sapiens GN=GPRC5A PE=1 SV=5;sp|Q8NFJ5|RAI3_HUMAN Retinoic acid-induced protein 3 OS=Homo sapiens GN=GPRC5A PE=1 SV=2	2	1	1	1	0	0	0	1	0	0	0	0	0	1	0	0	0	0	0	1	0	0	4.7	4.7	4.7	30.618	274	274;357	0.0015385	7.0906	0	0	0	4.7	0
sp|Q7Z406|MYH14_HUMAN;tr|M0QY43|M0QY43_HUMAN	sp|Q7Z406|MYH14_HUMAN;tr|M0QY43|M0QY43_HUMAN	1080400	1	1	1	1	1	1080400	1	1	6;5	1;1	1;1	sp|Q7Z406|MYH14_HUMAN Myosin-14 OS=Homo sapiens GN=MYH14 PE=1 SV=2;tr|M0QY43|M0QY43_HUMAN Myosin-14 (Fragment) OS=Homo sapiens GN=MYH14 PE=1 SV=5	2	6	1	1	5	0	0	3	1	1	1	0	0	1	0	0	1	0	0	1	0	0	3	0.6	0.6	227.87	1995	1995;1003	0.0029455	6.756	2.2	0	0	1.7	0.8
tr|F8WDD7|F8WDD7_HUMAN;sp|P59998|ARPC4_HUMAN;tr|F8WCF6|F8WCF6_HUMAN;tr|A0A0A6YYG9|A0A0A6YYG9_HUMAN;tr|R4GN08|R4GN08_HUMAN;tr|H7C0A3|H7C0A3_HUMAN	tr|F8WDD7|F8WDD7_HUMAN;sp|P59998|ARPC4_HUMAN;tr|F8WCF6|F8WCF6_HUMAN;tr|A0A0A6YYG9|A0A0A6YYG9_HUMAN;tr|R4GN08|R4GN08_HUMAN;tr|H7C0A3|H7C0A3_HUMAN	946270	1	1	1	1	1	946270	1	1	2;2;2;2;1;1	2;2;2;2;1;1	2;2;2;2;1;1	tr|F8WDD7|F8WDD7_HUMAN Actin-related protein 2/3 complex subunit 4 OS=Homo sapiens GN=ARPC4 PE=1 SV=1;sp|P59998|ARPC4_HUMAN Actin-related protein 2/3 complex subunit 4 OS=Homo sapiens GN=ARPC4 PE=1 SV=3;tr|F8WCF6|F8WCF6_HUMAN Protein ARPC4-TTLL3 OS=Homo sa	6	2	2	2	1	0	0	1	0	0	1	0	0	1	0	0	1	0	0	1	0	0	16.8	16.8	16.8	13.057	113	113;168;181;625;77;167	0	12.57	7.1	0	0	9.7	0
sp|Q9NYP9|MS18A_HUMAN	sp|Q9NYP9|MS18A_HUMAN	855220	1	1	1	1	1	855220	1	1	1	1	1	sp|Q9NYP9|MS18A_HUMAN Protein Mis18-alpha OS=Homo sapiens GN=MIS18A PE=1 SV=1	1	1	1	1	0	0	0	1	0	0	0	0	0	1	0	0	0	0	0	1	0	0	6.4	6.4	6.4	25.863	233	233	0.0069444	6.3736	0	0	0	6.4	0
tr|H0Y6Q4|H0Y6Q4_HUMAN;sp|Q5VT06|CE350_HUMAN	tr|H0Y6Q4|H0Y6Q4_HUMAN;sp|Q5VT06|CE350_HUMAN	842600	1	1	1	1	1	842600	1	1	1;1	1;1	1;1	tr|H0Y6Q4|H0Y6Q4_HUMAN Centrosome-associated protein 350 (Fragment) OS=Homo sapiens GN=CEP350 PE=1 SV=1;sp|Q5VT06|CE350_HUMAN Centrosome-associated protein 350 OS=Homo sapiens GN=CEP350 PE=1 SV=1	2	1	1	1	1	0	0	1	0	0	1	0	0	1	0	0	1	0	0	1	0	0	5.1	5.1	5.1	36.827	331	331;3117	0.0043732	6.6391	5.1	0	0	5.1	0
tr|Q86YM6|Q86YM6_HUMAN;sp|Q86YM7|HOME1_HUMAN	tr|Q86YM6|Q86YM6_HUMAN;sp|Q86YM7|HOME1_HUMAN	742220	1	1	1	1	1	742220	1	1	1;1	1;1	1;1	tr|Q86YM6|Q86YM6_HUMAN HOMER1F OS=Homo sapiens GN=HOMER1 PE=1 SV=1;sp|Q86YM7|HOME1_HUMAN Homer protein homolog 1 OS=Homo sapiens GN=HOMER1 PE=1 SV=2	2	1	1	1	0	0	0	1	0	0	0	0	0	1	0	0	0	0	0	1	0	0	7.2	7.2	7.2	20.819	180	180;354	0.0057143	6.5435	0	0	0	7.2	0
CON__Q86YZ3;sp|Q86YZ3|HORN_HUMAN	CON__Q86YZ3;sp|Q86YZ3|HORN_HUMAN	713250	1	1	1	1	1	713250	1	1	1;1	1;1	1;1	;sp|Q86YZ3|HORN_HUMAN Hornerin OS=Homo sapiens GN=HRNR PE=1 SV=2	2	1	1	1	1	0	1	1	0	0	1	0	1	1	0	0	1	0	1	1	0	0	1.7	1.7	1.7	282.39	2850	2850;3419	0.0014948	6.9026	1.7	0	1.7	1.7	0
tr|J3QRX9|J3QRX9_HUMAN;tr|J3QRX4|J3QRX4_HUMAN;sp|Q9NQ92|COPRS_HUMAN	tr|J3QRX9|J3QRX9_HUMAN;tr|J3QRX4|J3QRX4_HUMAN;sp|Q9NQ92|COPRS_HUMAN	681950	1	1	1	1	1	681950	1	1	1;1;1	1;1;1	1;1;1	tr|J3QRX9|J3QRX9_HUMAN Coordinator of PRMT5 and differentiation stimulator OS=Homo sapiens GN=COPRS PE=1 SV=1;tr|J3QRX4|J3QRX4_HUMAN Coordinator of PRMT5 and differentiation stimulator OS=Homo sapiens GN=COPRS PE=1 SV=1;sp|Q9NQ92|COPRS_HUMAN Coordinator of	3	1	1	1	1	0	0	1	0	0	1	0	0	1	0	0	1	0	0	1	0	0	26.5	26.5	26.5	7.2945	68	68;82;184	0	13.504	26.5	0	0	26.5	0
sp|Q02880|TOP2B_HUMAN;tr|E9PCY5|E9PCY5_HUMAN;tr|J3KTB7|J3KTB7_HUMAN	sp|Q02880|TOP2B_HUMAN;tr|E9PCY5|E9PCY5_HUMAN;tr|J3KTB7|J3KTB7_HUMAN	627390	1	1	1	1	1	627390	1	1	4;4;2	2;2;0	2;2;0	sp|Q02880|TOP2B_HUMAN DNA topoisomerase 2-beta OS=Homo sapiens GN=TOP2B PE=1 SV=3;tr|E9PCY5|E9PCY5_HUMAN DNA topoisomerase 2 (Fragment) OS=Homo sapiens GN=TOP2B PE=1 SV=1;tr|J3KTB7|J3KTB7_HUMAN DNA topoisomerase 2-alpha (Fragment) OS=Homo sapiens GN=TOP2A	3	4	2	2	2	1	0	3	2	2	1	0	0	1	1	1	1	0	0	1	1	1	2.9	1.5	1.5	183.26	1626	1626;1150;147	0	12.535	1.5	0.8	0	2.2	1.5
CON__P02666	CON__P02666	1	1.75291e-07	1	1	5704800	1	1	1	1	2	2	2		1	2	2	2	1	1	0	0	0	1	1	1	0	0	0	1	1	1	0	0	0	1	12.4	12.4	12.4	23.583	209	209	0	17.625	9.1	9.1	0	0	0
sp|P05109|S10A8_HUMAN	sp|P05109|S10A8_HUMAN	1	3.88214e-07	1	1	2575900	1	1	1	1	1	1	1	sp|P05109|S10A8_HUMAN Protein S100-A8 OS=Homo sapiens GN=S100A8 PE=1 SV=1	1	1	1	1	0	1	0	0	0	1	0	1	0	0	0	1	0	1	0	0	0	1	11.8	11.8	11.8	10.834	93	93	0.0057971	6.5987	0	11.8	0	0	0
sp|P10599|THIO_HUMAN	sp|P10599|THIO_HUMAN	1	5.11247e-07	1	1	1956000	1	1	1	1	1	1	1	sp|P10599|THIO_HUMAN Thioredoxin OS=Homo sapiens GN=TXN PE=1 SV=3	1	1	1	1	0	1	0	0	0	0	0	1	0	0	0	0	0	1	0	0	0	0	12.4	12.4	12.4	11.737	105	105	0.0014925	6.873	0	12.4	0	0	0
tr|A0A087WVS8|A0A087WVS8_HUMAN;sp|Q70IA6|MOB2_HUMAN	tr|A0A087WVS8|A0A087WVS8_HUMAN;sp|Q70IA6|MOB2_HUMAN	1	7.33945e-07	1	1	1362500	1	1	1	1	2;2	2;2	2;2	tr|A0A087WVS8|A0A087WVS8_HUMAN MOB kinase activator 2 OS=Homo sapiens GN=MOB2 PE=1 SV=1;sp|Q70IA6|MOB2_HUMAN MOB kinase activator 2 OS=Homo sapiens GN=MOB2 PE=1 SV=1	2	2	2	2	1	1	0	0	0	0	1	1	0	0	0	0	1	1	0	0	0	0	7.6	7.6	7.6	26.879	236	236;237	0	12.24	3	4.7	0	0	0
sp|Q9UKU0|ACSL6_HUMAN;tr|Q14172|Q14172_HUMAN	sp|Q9UKU0|ACSL6_HUMAN	5.13637e-09	1	1	194690000	1	1	1	1	1	14;1	1;1	1;1	sp|Q9UKU0|ACSL6_HUMAN Long-chain-fatty-acid--CoA ligase 6 OS=Homo sapiens GN=ACSL6 PE=2 SV=4	2	14	1	1	9	9	7	8	11	10	1	0	0	0	0	0	1	0	0	0	0	0	2.4	0.3	0.3	572.6	5234	5234;905	1	-2	1.8	1.7	1.1	1.6	1.9
sp|P49368|TCPG_HUMAN;tr|B4DUR8|B4DUR8_HUMAN;tr|Q5SZX6|Q5SZX6_HUMAN	sp|P49368|TCPG_HUMAN;tr|B4DUR8|B4DUR8_HUMAN	1.77349e-08	1	1	56386000	1	1	1	1	1	3;3;1	3;3;1	3;3;1	sp|P49368|TCPG_HUMAN T-complex protein 1 subunit gamma OS=Homo sapiens GN=CCT3 PE=1 SV=4;tr|B4DUR8|B4DUR8_HUMAN T-complex protein 1 subunit gamma OS=Homo sapiens GN=CCT3 PE=1 SV=1	3	3	3	3	3	1	0	0	0	0	3	1	0	0	0	0	3	1	0	0	0	0	6.6	6.6	6.6	60.533	545	545;500;276	0	17.882	6.6	2.6	0	0	0
sp|P49792|RBP2_HUMAN;sp|P0DJD0|RGPD1_HUMAN;tr|F8VYC4|F8VYC4_HUMAN;sp|P0DJD1|RGPD2_HUMAN;tr|J3KQ37|J3KQ37_HUMAN;sp|Q99666|RGPD5_HUMAN;sp|O14715|RGPD8_HUMAN;tr|F8WBP7|F8WBP7_HUMAN;tr|F8W705|F8W705_HUMAN	sp|P49792|RBP2_HUMAN	7.39754e-08	1	1	13518000	1	1	1	1	1	11;4;4;4;3;3;3;1;1	11;4;4;4;3;3;3;1;1	7;0;0;0;0;0;0;1;0	sp|P49792|RBP2_HUMAN E3 SUMO-protein ligase RanBP2 OS=Homo sapiens GN=RANBP2 PE=1 SV=2	9	11	11	7	10	0	2	1	1	1	10	0	2	1	1	1	7	0	0	0	0	0	4.1	4.1	2.7	358.2	3224	3224;1748;1756;1756;1625;1765;1765;189;904	0	77.736	3.7	0	0.7	0.4	0.4
sp|P07196|NFL_HUMAN;tr|A0A087X0W2|A0A087X0W2_HUMAN	sp|P07196|NFL_HUMAN;tr|A0A087X0W2|A0A087X0W2_HUMAN	9.997e-08	1	1	10003000	1	1	1	1	1	8;5	6;5	6;5	sp|P07196|NFL_HUMAN Neurofilament light polypeptide OS=Homo sapiens GN=NEFL PE=1 SV=3;tr|A0A087X0W2|A0A087X0W2_HUMAN Neurofilament light polypeptide OS=Homo sapiens GN=NEFL PE=1 SV=1	2	8	6	6	7	1	1	3	0	1	6	0	0	1	0	1	6	0	0	1	0	1	14.2	11	11	61.516	543	543;284	0	35.115	12.7	1.7	1.7	4.6	0
sp|Q9NP73|ALG13_HUMAN;tr|A0A096LPI3|A0A096LPI3_HUMAN	sp|Q9NP73|ALG13_HUMAN	1.01353e-07	1	1	9866500	1	1	1	1	1	5;2	5;2	5;2	sp|Q9NP73|ALG13_HUMAN Putative bifunctional UDP-N-acetylglucosamine transferase and deubiquitinase ALG13 OS=Homo sapiens GN=ALG13 PE=1 SV=2	2	5	5	5	5	0	0	1	0	0	5	0	0	1	0	0	5	0	0	1	0	0	2.6	2.6	2.6	189.72	1740	1740;373	0	29.983	2.6	0	0	0.6	0
tr|L0R819|L0R819_HUMAN;tr|U3KQP1|U3KQP1_HUMAN;tr|U3KQP6|U3KQP6_HUMAN;tr|U3KQ49|U3KQ49_HUMAN	tr|L0R819|L0R819_HUMAN;tr|U3KQP1|U3KQP1_HUMAN;tr|U3KQP6|U3KQP6_HUMAN;tr|U3KQ49|U3KQ49_HUMAN	1.23442e-07	1	1	8101000	1	1	1	1	1	2;2;1;1	2;2;1;1	2;2;1;1	tr|L0R819|L0R819_HUMAN Alternative protein ASNSD1 OS=Homo sapiens GN=ASNSD1 PE=1 SV=1;tr|U3KQP1|U3KQP1_HUMAN Asparagine synthetase domain-containing protein 1 (Fragment) OS=Homo sapiens GN=ASNSD1 PE=1 SV=1;tr|U3KQP6|U3KQP6_HUMAN Asparagine synthetase domai	4	2	2	2	2	0	0	1	0	0	2	0	0	1	0	0	2	0	0	1	0	0	24	24	24	11.25	96	96;246;57;63	0	15.456	24	0	0	13.5	0
tr|H3BU53|H3BU53_HUMAN	tr|H3BU53|H3BU53_HUMAN	1.27184e-07	1	1	7862600	1	1	1	1	1	24	3	3	tr|H3BU53|H3BU53_HUMAN MAX gene-associated protein (Fragment) OS=Homo sapiens GN=MGA PE=1 SV=1	1	24	3	3	19	7	6	16	7	10	3	0	1	1	0	1	3	0	1	1	0	1	22.7	3.3	3.3	127.14	1174	1174	0	19.542	19.4	7.4	6.3	14.6	7.6
sp|P51587|BRCA2_HUMAN	sp|P51587|BRCA2_HUMAN	1.27298e-07	1	1	7855600	1	1	1	1	1	7	7	7	sp|P51587|BRCA2_HUMAN Breast cancer type 2 susceptibility protein OS=Homo sapiens GN=BRCA2 PE=1 SV=2	1	7	7	7	6	0	0	1	0	0	6	0	0	1	0	0	6	0	0	1	0	0	2.8	2.8	2.8	384.22	3418	3418	0	41.596	2.4	0	0	0.3	0
sp|Q9H7D7|WDR26_HUMAN;tr|C9JCS7|C9JCS7_HUMAN;tr|H0Y9R3|H0Y9R3_HUMAN	sp|Q9H7D7|WDR26_HUMAN;tr|C9JCS7|C9JCS7_HUMAN;tr|H0Y9R3|H0Y9R3_HUMAN	1.27462e-07	1	1	7845500	1	1	1	1	1	4;2;2	4;2;2	4;2;2	sp|Q9H7D7|WDR26_HUMAN WD repeat-containing protein 26 OS=Homo sapiens GN=WDR26 PE=1 SV=3;tr|C9JCS7|C9JCS7_HUMAN WD repeat-containing protein 26 (Fragment) OS=Homo sapiens GN=WDR26 PE=1 SV=5;tr|H0Y9R3|H0Y9R3_HUMAN WD repeat-containing protein 26 (Fragment)	3	4	4	4	3	0	0	2	0	0	3	0	0	2	0	0	3	0	0	2	0	0	5.9	5.9	5.9	72.123	661	661;126;295	0	24.743	4.5	0	0	3.3	0
sp|P19105|ML12A_HUMAN;sp|O14950|ML12B_HUMAN;tr|J3QRS3|J3QRS3_HUMAN;sp|P24844|MYL9_HUMAN;tr|J3KTJ1|J3KTJ1_HUMAN	sp|P19105|ML12A_HUMAN;sp|O14950|ML12B_HUMAN;tr|J3QRS3|J3QRS3_HUMAN;sp|P24844|MYL9_HUMAN;tr|J3KTJ1|J3KTJ1_HUMAN	1.27468e-07	1	1	7845100	1	1	1	1	1	4;4;4;3;2	4;4;4;3;2	4;4;4;3;2	sp|P19105|ML12A_HUMAN Myosin regulatory light chain 12A OS=Homo sapiens GN=MYL12A PE=1 SV=2;sp|O14950|ML12B_HUMAN Myosin regulatory light chain 12B OS=Homo sapiens GN=MYL12B PE=1 SV=2;tr|J3QRS3|J3QRS3_HUMAN Myosin regulatory light chain 12A OS=Homo sapiens	5	4	4	4	4	0	0	1	0	0	4	0	0	1	0	0	4	0	0	1	0	0	24	24	24	19.794	171	171;172;177;172;114	0	27.421	24	0	0	6.4	0
tr|E3W994|E3W994_HUMAN;tr|J3KR49|J3KR49_HUMAN;sp|O75122|CLAP2_HUMAN;tr|E7ERI8|E7ERI8_HUMAN;tr|E7EW49|E7EW49_HUMAN;tr|D6RBU8|D6RBU8_HUMAN;tr|C9J668|C9J668_HUMAN;tr|B3KR06|B3KR06_HUMAN;tr|E7ENG2|E7ENG2_HUMAN	tr|E3W994|E3W994_HUMAN;tr|J3KR49|J3KR49_HUMAN;sp|O75122|CLAP2_HUMAN;tr|E7ERI8|E7ERI8_HUMAN;tr|E7EW49|E7EW49_HUMAN;tr|D6RBU8|D6RBU8_HUMAN;tr|C9J668|C9J668_HUMAN;tr|B3KR06|B3KR06_HUMAN;tr|E7ENG2|E7ENG2_HUMAN	1.36295e-07	1	1	7337000	1	1	1	1	1	4;4;4;4;4;3;3;3;3	4;4;4;4;4;3;3;3;3	4;4;4;4;4;3;3;3;3	tr|E3W994|E3W994_HUMAN CLIP-associating protein 2 OS=Homo sapiens GN=CLASP2 PE=1 SV=2;tr|J3KR49|J3KR49_HUMAN CLIP-associating protein 2 OS=Homo sapiens GN=CLASP2 PE=1 SV=1;sp|O75122|CLAP2_HUMAN CLIP-associating protein 2 OS=Homo sapiens GN=CLASP2 PE=1 SV=2	9	4	4	4	4	1	1	0	0	0	4	1	1	0	0	0	4	1	1	0	0	0	5.1	5.1	5.1	138.86	1273	1273;1293;1294;1513;1514;233;318;454;941	0	28.002	5.1	1.6	1.3	0	0
sp|O95425|SVIL_HUMAN	sp|O95425|SVIL_HUMAN	1.43092e-07	1	1	6988500	1	1	1	1	1	6	6	6	sp|O95425|SVIL_HUMAN Supervillin OS=Homo sapiens GN=SVIL PE=1 SV=2	1	6	6	6	6	0	0	0	0	0	6	0	0	0	0	0	6	0	0	0	0	0	4	4	4	247.74	2214	2214	0	35.818	4	0	0	0	0
tr|Q5JZB8|Q5JZB8_HUMAN;sp|Q9BPZ2|SPI2B_HUMAN;sp|Q99865|SPI2A_HUMAN;tr|Q5JZB7|Q5JZB7_HUMAN;tr|A0A087X074|A0A087X074_HUMAN	tr|Q5JZB8|Q5JZB8_HUMAN;sp|Q9BPZ2|SPI2B_HUMAN;sp|Q99865|SPI2A_HUMAN	1.4904e-07	1	1	6709600	1	1	1	1	1	3;3;3;1;1	3;3;3;1;1	3;3;3;1;1	tr|Q5JZB8|Q5JZB8_HUMAN Spindlin-2B (Fragment) OS=Homo sapiens GN=SPIN2B PE=4 SV=1;sp|Q9BPZ2|SPI2B_HUMAN Spindlin-2B OS=Homo sapiens GN=SPIN2B PE=2 SV=1;sp|Q99865|SPI2A_HUMAN Spindlin-2A OS=Homo sapiens GN=SPIN2A PE=1 SV=3	5	3	3	3	3	1	1	1	1	1	3	1	1	1	1	1	3	1	1	1	1	1	16.6	16.6	16.6	27.811	247	247;258;258;157;157	0	20.128	16.6	7.3	7.3	7.3	7.3
sp|P33992|MCM5_HUMAN;tr|B1AHB1|B1AHB1_HUMAN;tr|B1AHA9|B1AHA9_HUMAN	sp|P33992|MCM5_HUMAN;tr|B1AHB1|B1AHB1_HUMAN	1.63201e-07	1	1	6127400	1	1	1	1	1	5;4;1	5;4;1	5;4;1	sp|P33992|MCM5_HUMAN DNA replication licensing factor MCM5 OS=Homo sapiens GN=MCM5 PE=1 SV=5;tr|B1AHB1|B1AHB1_HUMAN DNA helicase OS=Homo sapiens GN=MCM5 PE=1 SV=1	3	5	5	5	5	0	0	0	1	0	5	0	0	0	1	0	5	0	0	0	1	0	9.7	9.7	9.7	82.285	734	734;691;231	0	31.797	9.7	0	0	0	2.2
sp|P49756|RBM25_HUMAN;tr|E9PQU5|E9PQU5_HUMAN	sp|P49756|RBM25_HUMAN;tr|E9PQU5|E9PQU5_HUMAN	1.63452e-07	1	1	6118000	1	1	1	1	1	4;3	4;3	4;3	sp|P49756|RBM25_HUMAN RNA-binding protein 25 OS=Homo sapiens GN=RBM25 PE=1 SV=3;tr|E9PQU5|E9PQU5_HUMAN RNA-binding protein 25 (Fragment) OS=Homo sapiens GN=RBM25 PE=1 SV=1	2	4	4	4	3	0	0	1	0	2	3	0	0	1	0	2	3	0	0	1	0	2	6	6	6	100.18	843	843;243	0	24.353	5.1	0	0	1.8	0
sp|Q8IX12|CCAR1_HUMAN;tr|A0A0C4DGG8|A0A0C4DGG8_HUMAN;tr|F5H2E6|F5H2E6_HUMAN;tr|F5H3E1|F5H3E1_HUMAN;tr|F5H1H2|F5H1H2_HUMAN;tr|F5H7M9|F5H7M9_HUMAN;tr|H0YFJ7|H0YFJ7_HUMAN	sp|Q8IX12|CCAR1_HUMAN;tr|A0A0C4DGG8|A0A0C4DGG8_HUMAN;tr|F5H2E6|F5H2E6_HUMAN	1.65e-07	1	1	6060600	1	1	1	1	1	7;5;4;3;2;1;1	7;5;4;3;2;1;1	7;5;4;3;2;1;1	sp|Q8IX12|CCAR1_HUMAN Cell division cycle and apoptosis regulator protein 1 OS=Homo sapiens GN=CCAR1 PE=1 SV=2;tr|A0A0C4DGG8|A0A0C4DGG8_HUMAN Cell division cycle and apoptosis regulator protein 1 (Fragment) OS=Homo sapiens GN=CCAR1 PE=1 SV=1;tr|F5H2E6|F5H2	7	7	7	7	5	1	2	0	3	1	5	1	2	0	3	1	5	1	2	0	3	1	7.2	7.2	7.2	132.82	1150	1150;1043;772;568;646;171;290	0	44.433	4.9	1.2	2.3	0	3.6
CON__Q3SZR3	CON__Q3SZR3	1.74724e-07	1	1	5723300	1	1	1	1	1	3	3	3		1	3	3	3	2	1	1	2	0	0	2	1	1	2	0	0	2	1	1	2	0	0	15.3	15.3	15.3	23.182	202	202	0	24.519	14.9	5.9	5.9	15.3	0
tr|A0A087X0F1|A0A087X0F1_HUMAN;sp|Q9UK61|F208A_HUMAN	tr|A0A087X0F1|A0A087X0F1_HUMAN;sp|Q9UK61|F208A_HUMAN	1.74932e-07	1	1	5716500	1	1	1	1	1	6;6	6;6	6;6	tr|A0A087X0F1|A0A087X0F1_HUMAN Protein FAM208A OS=Homo sapiens GN=FAM208A PE=1 SV=1;sp|Q9UK61|F208A_HUMAN Protein FAM208A OS=Homo sapiens GN=FAM208A PE=1 SV=3	2	6	6	6	4	0	0	1	0	2	4	0	0	1	0	2	4	0	0	1	0	2	6.6	6.6	6.6	117.31	1035	1035;1670	0	36.05	4	0	0	1.3	0
sp|Q9Y277|VDAC3_HUMAN;tr|E5RK27|E5RK27_HUMAN;tr|E5RFP6|E5RFP6_HUMAN;tr|E5RJN6|E5RJN6_HUMAN;tr|E5RHZ6|E5RHZ6_HUMAN	sp|Q9Y277|VDAC3_HUMAN;tr|E5RK27|E5RK27_HUMAN;tr|E5RFP6|E5RFP6_HUMAN;tr|E5RJN6|E5RJN6_HUMAN;tr|E5RHZ6|E5RHZ6_HUMAN	1.79154e-07	1	1	5581800	1	1	1	1	1	2;1;1;1;1	2;1;1;1;1	2;1;1;1;1	sp|Q9Y277|VDAC3_HUMAN Voltage-dependent anion-selective channel protein 3 OS=Homo sapiens GN=VDAC3 PE=1 SV=1;tr|E5RK27|E5RK27_HUMAN Voltage-dependent anion-selective channel protein 3 (Fragment) OS=Homo sapiens GN=VDAC3 PE=1 SV=1;tr|E5RFP6|E5RFP6_HUMAN Vol	5	2	2	2	2	0	0	1	0	1	2	0	0	1	0	1	2	0	0	1	0	1	11.7	11.7	11.7	30.658	283	283;108;134;159;165	0	27.785	11.7	0	0	7.1	0
sp|Q6UVK1|CSPG4_HUMAN	sp|Q6UVK1|CSPG4_HUMAN	1.83076e-07	1	1	5462200	1	1	1	1	1	1	1	1	sp|Q6UVK1|CSPG4_HUMAN Chondroitin sulfate proteoglycan 4 OS=Homo sapiens GN=CSPG4 PE=1 SV=2	1	1	1	1	1	0	0	0	0	0	1	0	0	0	0	0	1	0	0	0	0	0	0.7	0.7	0.7	250.53	2322	2322	0.0015129	7.0114	0.7	0	0	0	0
REV__sp|O75417|DPOLQ_HUMAN;REV__tr|A0A087WXL3|A0A087WXL3_HUMAN	REV__sp|O75417|DPOLQ_HUMAN;REV__tr|A0A087WXL3|A0A087WXL3_HUMAN	1.83352e-07	1	1	5454000	1	1	1	1	1	1;1	1;1	1;1	sp|O75417|DPOLQ_HUMAN DNA polymerase theta OS=Homo sapiens GN=POLQ PE=1 SV=2;tr|A0A087WXL3|A0A087WXL3_HUMAN DNA polymerase theta OS=Homo sapiens GN=POLQ PE=1 SV=1	2	1	1	1	1	0	0	0	0	0	1	0	0	0	0	0	1	0	0	0	0	0	0	0	0	289.62	2590	2590;2725	0.0029674	6.8218	0	0	0	0	0
tr|H7C5M9|H7C5M9_HUMAN	tr|H7C5M9|H7C5M9_HUMAN	1.91018e-07	1	1	5235100	1	1	1	1	1	89	1	1	tr|H7C5M9|H7C5M9_HUMAN Programmed cell death protein 10 (Fragment) OS=Homo sapiens GN=PDCD10 PE=1 SV=1	1	89	1	1	70	33	18	59	14	11	1	0	0	0	0	0	1	0	0	0	0	0	36.7	0.6	0.6	305.65	2679	2679	0.0015873	7.7829	30.9	16.1	8.4	25.4	6.8
sp|Q8NAV1|PR38A_HUMAN	sp|Q8NAV1|PR38A_HUMAN	1.95366e-07	1	1	5118600	1	1	1	1	1	3	3	3	sp|Q8NAV1|PR38A_HUMAN Pre-mRNA-splicing factor 38A OS=Homo sapiens GN=PRPF38A PE=1 SV=1	1	3	3	3	3	1	0	1	1	0	3	1	0	1	1	0	3	1	0	1	1	0	12.5	12.5	12.5	37.476	312	312	0	19.774	12.5	3.8	0	5.1	3.8
tr|B8ZZJ1|B8ZZJ1_HUMAN;tr|H7C0W7|H7C0W7_HUMAN;sp|Q9BYI3|HYCCI_HUMAN	tr|B8ZZJ1|B8ZZJ1_HUMAN;tr|H7C0W7|H7C0W7_HUMAN;sp|Q9BYI3|HYCCI_HUMAN	1.99589e-07	1	1	5010300	1	1	1	1	1	4;4;3	4;4;3	4;4;3	tr|B8ZZJ1|B8ZZJ1_HUMAN Hyccin OS=Homo sapiens GN=FAM126A PE=1 SV=1;tr|H7C0W7|H7C0W7_HUMAN Hyccin (Fragment) OS=Homo sapiens GN=FAM126A PE=1 SV=1;sp|Q9BYI3|HYCCI_HUMAN Hyccin OS=Homo sapiens GN=FAM126A PE=1 SV=2	3	4	4	4	4	1	0	0	0	0	4	1	0	0	0	0	4	1	0	0	0	0	13.4	13.4	13.4	46.919	419	419;471;521	0	27.481	13.4	4.1	0	0	0
tr|E9PMD7|E9PMD7_HUMAN;sp|P62136|PP1A_HUMAN;tr|F8VYE8|F8VYE8_HUMAN;sp|P36873|PP1G_HUMAN;tr|F8W0W8|F8W0W8_HUMAN;tr|A0A087WYY5|A0A087WYY5_HUMAN;tr|E7ETD8|E7ETD8_HUMAN;tr|F5H1L6|F5H1L6_HUMAN;tr|F5H037|F5H037_HUMAN;tr|F8VR82|F8VR82_HUMAN	tr|E9PMD7|E9PMD7_HUMAN;sp|P62136|PP1A_HUMAN;tr|F8VYE8|F8VYE8_HUMAN;sp|P36873|PP1G_HUMAN;tr|F8W0W8|F8W0W8_HUMAN	2.02495e-07	1	1	4938400	1	1	1	1	1	4;4;2;2;2;1;1;1;1;1	4;4;2;2;2;1;1;1;1;1	2;2;0;0;0;0;0;1;1;0	tr|E9PMD7|E9PMD7_HUMAN Serine/threonine-protein phosphatase (Fragment) OS=Homo sapiens GN=PPP1CA PE=1 SV=1;sp|P62136|PP1A_HUMAN Serine/threonine-protein phosphatase PP1-alpha catalytic subunit OS=Homo sapiens GN=PPP1CA PE=1 SV=1;tr|F8VYE8|F8VYE8_HUMAN Seri	10	4	4	2	2	1	0	2	2	1	2	1	0	2	2	1	1	0	0	1	0	0	17.4	17.4	7.5	28.898	253	253;330;304;323;332;140;169;169;180;270	0	25.685	9.5	5.5	0	9.1	9.9
tr|B7ZM99|B7ZM99_HUMAN;tr|A0A0D9SG21|A0A0D9SG21_HUMAN;sp|B2RNN3|C1T9B_HUMAN;tr|X6R3J2|X6R3J2_HUMAN;tr|E9PCM2|E9PCM2_HUMAN	tr|B7ZM99|B7ZM99_HUMAN;tr|A0A0D9SG21|A0A0D9SG21_HUMAN;sp|B2RNN3|C1T9B_HUMAN;tr|X6R3J2|X6R3J2_HUMAN;tr|E9PCM2|E9PCM2_HUMAN	2.22202e-07	1	1	4500400	1	1	1	1	1	2;2;2;1;1	2;2;2;1;1	2;2;2;1;1	tr|B7ZM99|B7ZM99_HUMAN MTHFD1L protein OS=Homo sapiens GN=MTHFD1L PE=1 SV=1;tr|A0A0D9SG21|A0A0D9SG21_HUMAN Endothelin B receptor (Fragment) OS=Homo sapiens GN=EDNRB PE=1 SV=1;sp|B2RNN3|C1T9B_HUMAN Complement C1q and tumor necrosis factor-related protein 9B	5	2	2	2	2	0	0	0	0	0	2	0	0	0	0	0	2	0	0	0	0	0	2.7	2.7	2.7	105.89	979	979;1111;2450;652;886	0	12.935	2.7	0	0	0	0
sp|Q5JUX0|SPIN3_HUMAN	sp|Q5JUX0|SPIN3_HUMAN	2.29268e-07	1	1	4361700	1	1	1	1	1	5	2	2	sp|Q5JUX0|SPIN3_HUMAN Spindlin-3 OS=Homo sapiens GN=SPIN3 PE=1 SV=1	1	5	2	2	5	2	3	2	1	1	2	0	1	0	0	0	2	0	1	0	0	0	27.1	13.6	13.6	29.207	258	258	0	11.801	27.1	10.9	14.7	10.9	6.6
sp|P40227|TCPZ_HUMAN	sp|P40227|TCPZ_HUMAN	2.32488e-07	1	1	4301300	1	1	1	1	1	3	3	3	sp|P40227|TCPZ_HUMAN T-complex protein 1 subunit zeta OS=Homo sapiens GN=CCT6A PE=1 SV=3	1	3	3	3	3	0	0	1	0	0	3	0	0	1	0	0	3	0	0	1	0	0	5.8	5.8	5.8	58.024	531	531	0	17.585	5.8	0	0	2.3	0
sp|Q86TV6|TTC7B_HUMAN;tr|G3V3H1|G3V3H1_HUMAN;tr|G3V3E4|G3V3E4_HUMAN	sp|Q86TV6|TTC7B_HUMAN;tr|G3V3H1|G3V3H1_HUMAN	2.362e-07	1	1	4233700	1	1	1	1	1	4;3;1	4;3;1	4;3;1	sp|Q86TV6|TTC7B_HUMAN Tetratricopeptide repeat protein 7B OS=Homo sapiens GN=TTC7B PE=1 SV=3;tr|G3V3H1|G3V3H1_HUMAN Tetratricopeptide repeat protein 7B (Fragment) OS=Homo sapiens GN=TTC7B PE=1 SV=5	3	4	4	4	3	1	0	1	0	0	3	1	0	1	0	0	3	1	0	1	0	0	5.3	5.3	5.3	94.178	843	843;371;48	0	25.838	3.7	1.7	0	1.1	0
sp|P55884|EIF3B_HUMAN;tr|C9JZG1|C9JZG1_HUMAN	sp|P55884|EIF3B_HUMAN	2.37242e-07	1	1	4215100	1	1	1	1	1	4;1	4;1	4;1	sp|P55884|EIF3B_HUMAN Eukaryotic translation initiation factor 3 subunit B OS=Homo sapiens GN=EIF3B PE=1 SV=3	2	4	4	4	3	0	0	0	1	0	3	0	0	0	1	0	3	0	0	0	1	0	7	7	7	92.48	814	814;302	0	23.644	3.9	0	0	0	3.1
sp|Q14974|IMB1_HUMAN;tr|J3QR48|J3QR48_HUMAN;tr|J3KTM9|J3KTM9_HUMAN	sp|Q14974|IMB1_HUMAN;tr|J3QR48|J3QR48_HUMAN;tr|J3KTM9|J3KTM9_HUMAN	2.37383e-07	1	1	4212600	1	1	1	1	1	4;2;2	4;2;2	4;2;2	sp|Q14974|IMB1_HUMAN Importin subunit beta-1 OS=Homo sapiens GN=KPNB1 PE=1 SV=2;tr|J3QR48|J3QR48_HUMAN Importin subunit beta-1 (Fragment) OS=Homo sapiens GN=KPNB1 PE=1 SV=5;tr|J3KTM9|J3KTM9_HUMAN Importin subunit beta-1 (Fragment) OS=Homo sapiens GN=KPNB1	3	4	4	4	3	0	0	1	0	0	3	0	0	1	0	0	3	0	0	1	0	0	5.5	5.5	5.5	97.169	876	876;149;690	0	24.4	4.5	0	0	1	0
sp|B5ME19|EIFCL_HUMAN;sp|Q99613|EIF3C_HUMAN;tr|H3BPE4|H3BPE4_HUMAN	sp|B5ME19|EIFCL_HUMAN;sp|Q99613|EIF3C_HUMAN	2.41809e-07	1	1	4135500	1	1	1	1	1	5;5;1	5;5;1	5;5;1	sp|B5ME19|EIFCL_HUMAN Eukaryotic translation initiation factor 3 subunit C-like protein OS=Homo sapiens GN=EIF3CL PE=3 SV=1;sp|Q99613|EIF3C_HUMAN Eukaryotic translation initiation factor 3 subunit C OS=Homo sapiens GN=EIF3C PE=1 SV=1	3	5	5	5	5	0	0	0	1	1	5	0	0	0	1	1	5	0	0	0	1	1	6.5	6.5	6.5	105.47	914	914;913;148	0	33.254	6.5	0	0	0	1.1
sp|P50990|TCPQ_HUMAN;tr|H7C2U0|H7C2U0_HUMAN;tr|H7C4C8|H7C4C8_HUMAN	sp|P50990|TCPQ_HUMAN;tr|H7C2U0|H7C2U0_HUMAN;tr|H7C4C8|H7C4C8_HUMAN	2.56174e-07	1	1	3903600	1	1	1	1	1	2;1;1	2;1;1	2;1;1	sp|P50990|TCPQ_HUMAN T-complex protein 1 subunit theta OS=Homo sapiens GN=CCT8 PE=1 SV=4;tr|H7C2U0|H7C2U0_HUMAN T-complex protein 1 subunit theta (Fragment) OS=Homo sapiens GN=CCT8 PE=1 SV=1;tr|H7C4C8|H7C4C8_HUMAN T-complex protein 1 subunit theta (Fragmen	3	2	2	2	2	0	0	1	0	0	2	0	0	1	0	0	2	0	0	1	0	0	4.7	4.7	4.7	59.62	548	548;107;323	0	16.266	4.7	0	0	2.7	0
sp|Q14315|FLNC_HUMAN	sp|Q14315|FLNC_HUMAN	2.62722e-07	1	1	3806300	1	1	1	1	1	2	1	1	sp|Q14315|FLNC_HUMAN Filamin-C OS=Homo sapiens GN=FLNC PE=1 SV=3	1	2	1	1	2	0	0	0	0	0	1	0	0	0	0	0	1	0	0	0	0	0	0.8	0.4	0.4	291.02	2725	2725	0.0057307	6.5454	0.8	0	0	0	0
sp|O00148|DX39A_HUMAN;tr|K7EQN7|K7EQN7_HUMAN;tr|K7EPJ3|K7EPJ3_HUMAN;tr|K7EN69|K7EN69_HUMAN;tr|K7ENP6|K7ENP6_HUMAN;tr|A0A0D9SEM9|A0A0D9SEM9_HUMAN;tr|K7EL56|K7EL56_HUMAN;tr|K7EIL8|K7EIL8_HUMAN;tr|F6SXL5|F6SXL5_HUMAN	sp|O00148|DX39A_HUMAN;tr|K7EQN7|K7EQN7_HUMAN	2.70416e-07	1	1	3698000	1	1	1	1	1	9;6;4;3;2;2;2;2;2	1;1;0;0;0;1;0;0;0	1;1;0;0;0;1;0;0;0	sp|O00148|DX39A_HUMAN ATP-dependent RNA helicase DDX39A OS=Homo sapiens GN=DDX39A PE=1 SV=2;tr|K7EQN7|K7EQN7_HUMAN ATP-dependent RNA helicase DDX39A (Fragment) OS=Homo sapiens GN=DDX39A PE=1 SV=1	9	9	1	1	7	3	4	6	6	6	1	0	0	0	0	0	1	0	0	0	0	0	21.5	2.6	2.6	49.129	427	427;255;189;130;92;96;108;125;136	1	-2	16.4	6.3	10.1	13.8	13.8
sp|Q01804|OTUD4_HUMAN;tr|D6RI06|D6RI06_HUMAN	sp|Q01804|OTUD4_HUMAN;tr|D6RI06|D6RI06_HUMAN	2.73052e-07	1	1	3662300	1	1	1	1	1	3;2	3;2	3;2	sp|Q01804|OTUD4_HUMAN OTU domain-containing protein 4 OS=Homo sapiens GN=OTUD4 PE=1 SV=4;tr|D6RI06|D6RI06_HUMAN OTU domain-containing protein 4 (Fragment) OS=Homo sapiens GN=OTUD4 PE=1 SV=1	2	3	3	3	3	0	0	1	0	0	3	0	0	1	0	0	3	0	0	1	0	0	2.4	2.4	2.4	124.04	1114	1114;372	0	17.862	2.4	0	0	1.1	0
sp|P24534|EF1B_HUMAN;tr|F2Z2G2|F2Z2G2_HUMAN;tr|C9JZW3|C9JZW3_HUMAN;tr|F8WF65|F8WF65_HUMAN	sp|P24534|EF1B_HUMAN;tr|F2Z2G2|F2Z2G2_HUMAN;tr|C9JZW3|C9JZW3_HUMAN;tr|F8WF65|F8WF65_HUMAN	2.88301e-07	1	1	3468600	1	1	1	1	1	2;1;1;1	2;1;1;1	2;1;1;1	sp|P24534|EF1B_HUMAN Elongation factor 1-beta OS=Homo sapiens GN=EEF1B2 PE=1 SV=3;tr|F2Z2G2|F2Z2G2_HUMAN Elongation factor 1-beta OS=Homo sapiens GN=EEF1B2 PE=1 SV=1;tr|C9JZW3|C9JZW3_HUMAN Elongation factor 1-beta (Fragment) OS=Homo sapiens GN=EEF1B2 PE=1	4	2	2	2	2	0	0	0	0	0	2	0	0	0	0	0	2	0	0	0	0	0	10.7	10.7	10.7	24.763	225	225;68;123;279	0	12.731	10.7	0	0	0	0
sp|P50991|TCPD_HUMAN	sp|P50991|TCPD_HUMAN	2.97124e-07	1	1	3365600	1	1	1	1	1	2	2	2	sp|P50991|TCPD_HUMAN T-complex protein 1 subunit delta OS=Homo sapiens GN=CCT4 PE=1 SV=4	1	2	2	2	2	0	0	1	0	1	2	0	0	1	0	1	2	0	0	1	0	1	4.8	4.8	4.8	57.924	539	539	0	12.716	4.8	0	0	2.4	0
tr|H7C048|H7C048_HUMAN;tr|K7EMQ8|K7EMQ8_HUMAN;tr|J3QKS7|J3QKS7_HUMAN;sp|Q969G3|SMCE1_HUMAN;tr|B4DGM3|B4DGM3_HUMAN	tr|H7C048|H7C048_HUMAN;tr|K7EMQ8|K7EMQ8_HUMAN;tr|J3QKS7|J3QKS7_HUMAN;sp|Q969G3|SMCE1_HUMAN;tr|B4DGM3|B4DGM3_HUMAN	3.02097e-07	1	1	3310200	1	1	1	1	1	2;2;2;2;2	2;2;2;2;2	2;2;2;2;2	tr|H7C048|H7C048_HUMAN SWI/SNF-related matrix-associated actin-dependent regulator of chromatin subfamily E member 1 (Fragment) OS=Homo sapiens GN=SMARCE1 PE=1 SV=1;tr|K7EMQ8|K7EMQ8_HUMAN SWI/SNF-related matrix-associated actin-dependent regulator of chrom	5	2	2	2	2	0	0	0	0	0	2	0	0	0	0	0	2	0	0	0	0	0	17.2	17.2	17.2	18.257	157	157;177;288;411;617	0	12.527	17.2	0	0	0	0
tr|B7Z2D2|B7Z2D2_HUMAN;sp|Q8NHQ1|CEP70_HUMAN;tr|C9J966|C9J966_HUMAN	tr|B7Z2D2|B7Z2D2_HUMAN;sp|Q8NHQ1|CEP70_HUMAN;tr|C9J966|C9J966_HUMAN	3.05371e-07	1	1	3274700	1	1	1	1	1	2;2;1	2;2;1	2;2;1	tr|B7Z2D2|B7Z2D2_HUMAN Centrosomal protein of 70 kDa OS=Homo sapiens GN=CEP70 PE=1 SV=1;sp|Q8NHQ1|CEP70_HUMAN Centrosomal protein of 70 kDa OS=Homo sapiens GN=CEP70 PE=1 SV=2;tr|C9J966|C9J966_HUMAN Centrosomal protein of 70 kDa (Fragment) OS=Homo sapiens G	3	2	2	2	2	0	0	0	0	0	2	0	0	0	0	0	2	0	0	0	0	0	5.2	5.2	5.2	52.013	445	445;597;542	0	12.946	5.2	0	0	0	0
tr|E9PF10|E9PF10_HUMAN;sp|O75694|NU155_HUMAN	tr|E9PF10|E9PF10_HUMAN;sp|O75694|NU155_HUMAN	3.13725e-07	1	1	3187500	1	1	1	1	1	3;3	3;3	3;3	tr|E9PF10|E9PF10_HUMAN Nuclear pore complex protein Nup155 OS=Homo sapiens GN=NUP155 PE=1 SV=1;sp|O75694|NU155_HUMAN Nuclear pore complex protein Nup155 OS=Homo sapiens GN=NUP155 PE=1 SV=1	2	3	3	3	3	0	0	0	0	0	3	0	0	0	0	0	3	0	0	0	0	0	2.7	2.7	2.7	148.09	1327	1327;1391	0	17.194	2.7	0	0	0	0
sp|Q15459|SF3A1_HUMAN;tr|H7C1L2|H7C1L2_HUMAN	sp|Q15459|SF3A1_HUMAN	3.17995e-07	1	1	3144700	1	1	1	1	1	3;1	3;1	3;1	sp|Q15459|SF3A1_HUMAN Splicing factor 3A subunit 1 OS=Homo sapiens GN=SF3A1 PE=1 SV=1	2	3	3	3	2	0	0	1	1	0	2	0	0	1	1	0	2	0	0	1	1	0	5.5	5.5	5.5	88.885	793	793;259	0	17.985	2.6	0	0	1.6	2.9
tr|H7C1F9|H7C1F9_HUMAN;sp|Q2PPJ7|RGPA2_HUMAN	tr|H7C1F9|H7C1F9_HUMAN;sp|Q2PPJ7|RGPA2_HUMAN	3.20307e-07	1	1	3122000	1	1	1	1	1	1;1	1;1	1;1	tr|H7C1F9|H7C1F9_HUMAN Ral GTPase-activating protein subunit alpha-2 (Fragment) OS=Homo sapiens GN=RALGAPA2 PE=1 SV=1;sp|Q2PPJ7|RGPA2_HUMAN Ral GTPase-activating protein subunit alpha-2 OS=Homo sapiens GN=RALGAPA2 PE=1 SV=2	2	1	1	1	1	0	0	0	0	0	1	0	0	0	0	0	1	0	0	0	0	0	0.5	0.5	0.5	194.93	1740	1740;1873	1	-2	0.5	0	0	0	0
sp|Q9BRS2|RIOK1_HUMAN	sp|Q9BRS2|RIOK1_HUMAN	3.23635e-07	1	1	3089900	1	1	1	1	1	3	3	3	sp|Q9BRS2|RIOK1_HUMAN Serine/threonine-protein kinase RIO1 OS=Homo sapiens GN=RIOK1 PE=1 SV=2	1	3	3	3	2	0	0	1	0	0	2	0	0	1	0	0	2	0	0	1	0	0	5.6	5.6	5.6	65.582	568	568	0	18.531	3.5	0	0	2.1	0
tr|J3QSX6|J3QSX6_HUMAN;tr|F8W8M4|F8W8M4_HUMAN;tr|A0A0A0MRL6|A0A0A0MRL6_HUMAN;sp|O14639|ABLM1_HUMAN;tr|H0Y7N6|H0Y7N6_HUMAN;tr|F6XFR5|F6XFR5_HUMAN	tr|J3QSX6|J3QSX6_HUMAN;tr|F8W8M4|F8W8M4_HUMAN;tr|A0A0A0MRL6|A0A0A0MRL6_HUMAN;sp|O14639|ABLM1_HUMAN;tr|H0Y7N6|H0Y7N6_HUMAN;tr|F6XFR5|F6XFR5_HUMAN	3.27912e-07	1	1	3049600	1	1	1	1	1	2;2;2;2;1;1	2;2;2;2;1;1	2;2;2;2;1;1	tr|J3QSX6|J3QSX6_HUMAN Actin-binding LIM protein 1 OS=Homo sapiens GN=ABLIM1 PE=1 SV=2;tr|F8W8M4|F8W8M4_HUMAN Actin-binding LIM protein 1 OS=Homo sapiens GN=ABLIM1 PE=1 SV=1;tr|A0A0A0MRL6|A0A0A0MRL6_HUMAN Actin-binding LIM protein 1 OS=Homo sapiens GN=ABLI	6	2	2	2	2	0	0	0	0	0	2	0	0	0	0	0	2	0	0	0	0	0	7.2	7.2	7.2	46.07	401	401;718;746;778;172;173	0	11.769	7.2	0	0	0	0
sp|Q4G0N7|F229B_HUMAN;tr|K7ELI0|K7ELI0_HUMAN	sp|Q4G0N7|F229B_HUMAN	3.40298e-07	1	1	2938600	1	1	1	1	1	5;2	2;1	2;1	sp|Q4G0N7|F229B_HUMAN Protein FAM229B OS=Homo sapiens GN=FAM229B PE=3 SV=1	2	5	2	2	5	2	2	2	1	3	2	0	0	1	0	1	2	0	0	1	0	1	7.5	2.7	2.7	76.348	692	692;474	0	12.207	7.5	2.9	2.9	2.6	1.4
sp|P52948|NUP98_HUMAN;tr|H7C3P6|H7C3P6_HUMAN;tr|H0YCT1|H0YCT1_HUMAN	sp|P52948|NUP98_HUMAN;tr|H7C3P6|H7C3P6_HUMAN	3.42138e-07	1	1	2922800	1	1	1	1	1	3;3;1	3;3;1	3;3;1	sp|P52948|NUP98_HUMAN Nuclear pore complex protein Nup98-Nup96 OS=Homo sapiens GN=NUP98 PE=1 SV=4;tr|H7C3P6|H7C3P6_HUMAN Nuclear pore complex protein Nup98-Nup96 (Fragment) OS=Homo sapiens GN=NUP98 PE=1 SV=1	3	3	3	3	3	0	0	0	0	0	3	0	0	0	0	0	3	0	0	0	0	0	1.5	1.5	1.5	197.58	1817	1817;753;93	0	16.743	1.5	0	0	0	0
sp|P62826|RAN_HUMAN;tr|B5MDF5|B5MDF5_HUMAN;tr|J3KQE5|J3KQE5_HUMAN;tr|H0YFC6|H0YFC6_HUMAN;tr|B4DV51|B4DV51_HUMAN;tr|F5H018|F5H018_HUMAN	sp|P62826|RAN_HUMAN;tr|B5MDF5|B5MDF5_HUMAN;tr|J3KQE5|J3KQE5_HUMAN;tr|H0YFC6|H0YFC6_HUMAN;tr|B4DV51|B4DV51_HUMAN;tr|F5H018|F5H018_HUMAN	3.7365e-07	1	1	2676300	1	1	1	1	1	2;2;2;1;1;1	2;2;2;1;1;1	2;2;2;1;1;1	sp|P62826|RAN_HUMAN GTP-binding nuclear protein Ran OS=Homo sapiens GN=RAN PE=1 SV=3;tr|B5MDF5|B5MDF5_HUMAN GTP-binding nuclear protein Ran OS=Homo sapiens GN=RAN PE=1 SV=1;tr|J3KQE5|J3KQE5_HUMAN GTP-binding nuclear protein Ran (Fragment) OS=Homo sapiens G	6	2	2	2	2	0	0	0	0	0	2	0	0	0	0	0	2	0	0	0	0	0	9.7	9.7	9.7	24.423	216	216;233;234;103;128;199	0	11.843	9.7	0	0	0	0
alt-CCNA2	alt-CCNA2	3.87582e-07	1	1	2580100	1	1	1	1	1	1	1	1	alt-CCNA2	1	1	1	1	1	0	0	0	0	0	1	0	0	0	0	0	1	0	0	0	0	0	13	13	13	11.53	115	115	0.0015576	7.3345	13	0	0	0	0
sp|O60216|RAD21_HUMAN;tr|E5RJW1|E5RJW1_HUMAN;tr|E5RJK5|E5RJK5_HUMAN;tr|E5RFV8|E5RFV8_HUMAN;tr|E5RIN7|E5RIN7_HUMAN;sp|Q9H4I0|RD21L_HUMAN	sp|O60216|RAD21_HUMAN;tr|E5RJW1|E5RJW1_HUMAN;tr|E5RJK5|E5RJK5_HUMAN;tr|E5RFV8|E5RFV8_HUMAN;tr|E5RIN7|E5RIN7_HUMAN;sp|Q9H4I0|RD21L_HUMAN	4.0848e-07	1	1	2448100	1	1	1	1	1	2;1;1;1;1;1	2;1;1;1;1;1	2;1;1;1;1;1	sp|O60216|RAD21_HUMAN Double-strand-break repair protein rad21 homolog OS=Homo sapiens GN=RAD21 PE=1 SV=2;tr|E5RJW1|E5RJW1_HUMAN Double-strand-break repair protein rad21 homolog (Fragment) OS=Homo sapiens GN=RAD21 PE=1 SV=1;tr|E5RJK5|E5RJK5_HUMAN Double-st	6	2	2	2	1	0	0	0	1	0	1	0	0	0	1	0	1	0	0	0	1	0	3.8	3.8	3.8	71.689	631	631;120;124;225;228;556	0	12.606	1.7	0	0	0	2.1
sp|Q9Y2L8|ZKSC5_HUMAN	sp|Q9Y2L8|ZKSC5_HUMAN	4.0873e-07	1	1	2446600	1	1	1	1	1	1	1	1	sp|Q9Y2L8|ZKSC5_HUMAN Zinc finger protein with KRAB and SCAN domains 5 OS=Homo sapiens GN=ZKSCAN5 PE=1 SV=1	1	1	1	1	1	0	0	0	0	0	1	0	0	0	0	0	1	0	0	0	0	0	1	1	1	96.902	839	839	1	-2	1	0	0	0	0
sp|O14654|IRS4_HUMAN	sp|O14654|IRS4_HUMAN	4.12167e-07	1	1	2426200	1	1	1	1	1	3	3	3	sp|O14654|IRS4_HUMAN Insulin receptor substrate 4 OS=Homo sapiens GN=IRS4 PE=1 SV=1	1	3	3	3	2	0	0	1	1	0	2	0	0	1	1	0	2	0	0	1	1	0	4.4	4.4	4.4	133.77	1257	1257	0	19.561	2.5	0	0	0.8	1.8
tr|E9PDF6|E9PDF6_HUMAN;sp|O43795|MYO1B_HUMAN;tr|E7EQD9|E7EQD9_HUMAN;tr|H7C2Y7|H7C2Y7_HUMAN	tr|E9PDF6|E9PDF6_HUMAN;sp|O43795|MYO1B_HUMAN	4.19217e-07	1	1	2385400	1	1	1	1	1	3;3;1;1	3;3;1;1	3;3;1;1	tr|E9PDF6|E9PDF6_HUMAN Unconventional myosin-Ib OS=Homo sapiens GN=MYO1B PE=1 SV=1;sp|O43795|MYO1B_HUMAN Unconventional myosin-Ib OS=Homo sapiens GN=MYO1B PE=1 SV=3	4	3	3	3	2	0	0	2	0	0	2	0	0	2	0	0	2	0	0	2	0	0	3	3	3	128.48	1107	1107;1136;303;386	0	19.449	2.3	0	0	2	0
sp|P04637|P53_HUMAN;tr|A0A087WZU8|A0A087WZU8_HUMAN;tr|E9PCY9|E9PCY9_HUMAN;tr|S4R334|S4R334_HUMAN;tr|E7EMR6|E7EMR6_HUMAN;tr|A0A087X1Q1|A0A087X1Q1_HUMAN;tr|E7EQX7|E7EQX7_HUMAN;tr|J3KP33|J3KP33_HUMAN	sp|P04637|P53_HUMAN;tr|A0A087WZU8|A0A087WZU8_HUMAN;tr|E9PCY9|E9PCY9_HUMAN;tr|S4R334|S4R334_HUMAN;tr|E7EMR6|E7EMR6_HUMAN;tr|A0A087X1Q1|A0A087X1Q1_HUMAN;tr|E7EQX7|E7EQX7_HUMAN;tr|J3KP33|J3KP33_HUMAN	4.22494e-07	1	1	2366900	1	1	1	1	1	4;3;2;2;2;2;2;2	4;3;2;2;2;2;2;2	4;3;2;2;2;2;2;2	sp|P04637|P53_HUMAN Cellular tumor antigen p53 OS=Homo sapiens GN=TP53 PE=1 SV=4;tr|A0A087WZU8|A0A087WZU8_HUMAN Cellular tumor antigen p53 OS=Homo sapiens GN=TP53 PE=1 SV=1;tr|E9PCY9|E9PCY9_HUMAN Cellular tumor antigen p53 (Fragment) OS=Homo sapiens GN=TP5	8	4	4	4	2	0	0	1	1	2	2	0	0	1	1	2	2	0	0	1	1	2	10.2	10.2	10.2	43.653	393	393;382;128;143;165;234;285;343	0	22.995	4.8	0	0	2.3	2.5
sp|Q15542|TAF5_HUMAN	sp|Q15542|TAF5_HUMAN	4.36129e-07	1	1	2292900	1	1	1	1	1	2	2	2	sp|Q15542|TAF5_HUMAN Transcription initiation factor TFIID subunit 5 OS=Homo sapiens GN=TAF5 PE=1 SV=3	1	2	2	2	2	0	0	1	0	0	2	0	0	1	0	0	2	0	0	1	0	0	3.9	3.9	3.9	86.829	800	800	0	14.444	3.9	0	0	2.2	0
tr|E7ENZ3|E7ENZ3_HUMAN;tr|B7ZAR1|B7ZAR1_HUMAN;tr|E9PCA1|E9PCA1_HUMAN;sp|P48643|TCPE_HUMAN	tr|E7ENZ3|E7ENZ3_HUMAN;tr|B7ZAR1|B7ZAR1_HUMAN;tr|E9PCA1|E9PCA1_HUMAN;sp|P48643|TCPE_HUMAN	4.801e-07	1	1	2082900	1	1	1	1	1	2;2;2;2	2;2;2;2	2;2;2;2	tr|E7ENZ3|E7ENZ3_HUMAN T-complex protein 1 subunit epsilon OS=Homo sapiens GN=CCT5 PE=1 SV=1;tr|B7ZAR1|B7ZAR1_HUMAN T-complex protein 1 subunit epsilon OS=Homo sapiens GN=CCT5 PE=1 SV=1;tr|E9PCA1|E9PCA1_HUMAN T-complex protein 1 subunit epsilon OS=Homo sap	4	2	2	2	2	0	0	0	0	0	2	0	0	0	0	0	2	0	0	0	0	0	5.3	5.3	5.3	53.848	486	486;503;520;541	0	14.028	5.3	0	0	0	0
tr|G3V5L1|G3V5L1_HUMAN;sp|P61244|MAX_HUMAN;tr|G3V570|G3V570_HUMAN;tr|Q6V3B1|Q6V3B1_HUMAN;tr|G3V563|G3V563_HUMAN;tr|G3V2R5|G3V2R5_HUMAN	tr|G3V5L1|G3V5L1_HUMAN;sp|P61244|MAX_HUMAN;tr|G3V570|G3V570_HUMAN;tr|Q6V3B1|Q6V3B1_HUMAN;tr|G3V563|G3V563_HUMAN;tr|G3V2R5|G3V2R5_HUMAN	4.88711e-07	1	1	2046200	1	1	1	1	1	2;2;1;1;1;1	2;2;1;1;1;1	2;2;1;1;1;1	tr|G3V5L1|G3V5L1_HUMAN Protein max OS=Homo sapiens GN=MAX PE=1 SV=1;sp|P61244|MAX_HUMAN Protein max OS=Homo sapiens GN=MAX PE=1 SV=1;tr|G3V570|G3V570_HUMAN Protein max (Fragment) OS=Homo sapiens GN=MAX PE=1 SV=5;tr|Q6V3B1|Q6V3B1_HUMAN MAX protein OS=Homo s	6	2	2	2	2	0	0	0	0	0	2	0	0	0	0	0	2	0	0	0	0	0	15.3	15.3	15.3	14.057	124	124;160;44;94;121;125	0	11.501	15.3	0	0	0	0
sp|Q96S59|RANB9_HUMAN	sp|Q96S59|RANB9_HUMAN	4.92053e-07	1	1	2032300	1	1	1	1	1	3	3	3	sp|Q96S59|RANB9_HUMAN Ran-binding protein 9 OS=Homo sapiens GN=RANBP9 PE=1 SV=1	1	3	3	3	2	0	0	2	0	0	2	0	0	2	0	0	2	0	0	2	0	0	4.9	4.9	4.9	77.846	729	729	0	19.116	3.7	0	0	3.2	0
sp|P55081|MFAP1_HUMAN	sp|P55081|MFAP1_HUMAN	4.96229e-07	1	1	2015200	1	1	1	1	1	2	2	2	sp|P55081|MFAP1_HUMAN Microfibrillar-associated protein 1 OS=Homo sapiens GN=MFAP1 PE=1 SV=2	1	2	2	2	2	0	0	0	1	1	2	0	0	0	1	1	2	0	0	0	1	1	6.2	6.2	6.2	51.958	439	439	0	13.058	6.2	0	0	0	3
tr|C9J295|C9J295_HUMAN;tr|A0A087WZZ9|A0A087WZZ9_HUMAN;tr|E5RIU6|E5RIU6_HUMAN;sp|P06493|CDK1_HUMAN;sp|Q00534|CDK6_HUMAN;sp|P50750|CDK9_HUMAN;tr|E5RGN0|E5RGN0_HUMAN;tr|A0A087X209|A0A087X209_HUMAN;sp|Q96Q40|CDK15_HUMAN;tr|A0A087WZU2|A0A087WZU2_HUMAN;tr|F8VXD2|F8VXD2_HUMAN;tr|G3V5T9|G3V5T9_HUMAN;tr|F5H6Z0|F5H6Z0_HUMAN;sp|Q07002|CDK18_HUMAN;sp|Q00536|CDK16_HUMAN;sp|Q00537|CDK17_HUMAN;tr|J3QSD7|J3QSD7_…	tr|C9J295|C9J295_HUMAN;tr|A0A087WZZ9|A0A087WZZ9_HUMAN;tr|E5RIU6|E5RIU6_HUMAN;sp|P06493|CDK1_HUMAN;sp|Q00534|CDK6_HUMAN;sp|P50750|CDK9_HUMAN;tr|E5RGN0|E5RGN0_HUMAN;tr|A0A087X209|A0A087X209_HUMAN;sp|Q96Q40|CDK15_HUMAN;tr|A0A087WZU2|A0A087WZU2_HUMAN;tr|F8VXD2|F8VXD2_HUMAN;tr|G3V5T9|G3V5T9_HUMAN;tr|F5H6Z0|F5H6Z0_HUMAN;sp|Q07002|CDK18_HUMAN;sp|Q00536|CDK16_HUMAN;sp|Q00537|CDK17_HUMAN;tr|J3QSD7|J3QSD7_…	5.08492e-07	1	1	1966600	1	1	1	1	1	2;2;2;2;1;1;1;1;1;1;1;1;1;1;1;1;1;1;1;1;1;1;1;1;1;1;1;1;1;1;1;1;1;1;1	2;2;2;2;1;1;1;1;1;1;1;1;1;1;1;1;1;1;1;1;1;1;1;1;1;1;1;1;1;1;1;1;1;1;1	2;2;2;2;1;1;1;1;1;1;1;1;1;1;1;1;1;1;1;1;1;1;1;1;1;1;1;1;1;1;1;1;1;1;1	tr|C9J295|C9J295_HUMAN Sialidase-4 (Fragment) OS=Homo sapiens GN=NEU4 PE=4 SV=1;tr|A0A087WZZ9|A0A087WZZ9_HUMAN Cyclin-dependent kinase 1 OS=Homo sapiens GN=CDK1 PE=1 SV=1;tr|E5RIU6|E5RIU6_HUMAN Cyclin-dependent kinase 1 (Fragment) OS=Homo sapiens GN=CDK1 P	35	2	2	2	2	0	0	0	0	0	2	0	0	0	0	0	2	0	0	0	0	0	3.9	3.9	3.9	48.627	456	456;224;189;297;326;372;393;418;435;448;132;346;470;472;496;523;1201;1490;340;324;469;213;303;298;292;260;238;165;305;208;203;201;186;170;1512	0	11.682	3.9	0	0	0	0
sp|Q8NCM8|DYHC2_HUMAN	sp|Q8NCM8|DYHC2_HUMAN	5.61956e-07	1	1	1779500	1	1	1	1	1	1	1	1	sp|Q8NCM8|DYHC2_HUMAN Cytoplasmic dynein 2 heavy chain 1 OS=Homo sapiens GN=DYNC2H1 PE=1 SV=4	1	1	1	1	1	0	0	0	0	0	1	0	0	0	0	0	1	0	0	0	0	0	0.5	0.5	0.5	528.22	4651	4651	0.0069156	6.3587	0.5	0	0	0	0
sp|P62699|YPEL5_HUMAN	sp|P62699|YPEL5_HUMAN	5.81159e-07	1	1	1720700	1	1	1	1	1	1	1	1	sp|P62699|YPEL5_HUMAN Protein yippee-like 5 OS=Homo sapiens GN=YPEL5 PE=1 SV=1	1	1	1	1	1	0	0	0	0	0	1	0	0	0	0	0	1	0	0	0	0	0	9.9	9.9	9.9	13.841	121	121	0.0056738	6.4818	9.9	0	0	0	0
tr|H0YHW2|H0YHW2_HUMAN;tr|H0YIF4|H0YIF4_HUMAN;tr|F8VSE7|F8VSE7_HUMAN;sp|Q96AV8|E2F7_HUMAN	tr|H0YHW2|H0YHW2_HUMAN;tr|H0YIF4|H0YIF4_HUMAN;tr|F8VSE7|F8VSE7_HUMAN;sp|Q96AV8|E2F7_HUMAN	5.91716e-07	1	1	1690000	1	1	1	1	1	1;1;1;1	1;1;1;1	1;1;1;1	tr|H0YHW2|H0YHW2_HUMAN Transcription factor E2F7 (Fragment) OS=Homo sapiens GN=E2F7 PE=1 SV=1;tr|H0YIF4|H0YIF4_HUMAN Transcription factor E2F7 (Fragment) OS=Homo sapiens GN=E2F7 PE=1 SV=1;tr|F8VSE7|F8VSE7_HUMAN Transcription factor E2F7 (Fragment) OS=Homo	4	1	1	1	1	0	0	0	0	0	1	0	0	0	0	0	1	0	0	0	0	0	6.7	6.7	6.7	24.092	208	208;219;693;911	0.0015015	6.9752	6.7	0	0	0	0
tr|E9PRI2|E9PRI2_HUMAN;tr|E7ESM3|E7ESM3_HUMAN;sp|Q7L2H7|EIF3M_HUMAN	tr|E9PRI2|E9PRI2_HUMAN;tr|E7ESM3|E7ESM3_HUMAN;sp|Q7L2H7|EIF3M_HUMAN	6.23791e-07	1	1	1603100	1	1	1	1	1	1;1;1	1;1;1	1;1;1	tr|E9PRI2|E9PRI2_HUMAN Eukaryotic translation initiation factor 3 subunit M OS=Homo sapiens GN=EIF3M PE=1 SV=1;tr|E7ESM3|E7ESM3_HUMAN Eukaryotic translation initiation factor 3 subunit M OS=Homo sapiens GN=EIF3M PE=1 SV=1;sp|Q7L2H7|EIF3M_HUMAN Eukaryotic t	3	1	1	1	1	0	0	0	0	0	1	0	0	0	0	0	1	0	0	0	0	0	30.5	30.5	30.5	6.382	59	59;123;374	0.0015106	6.9979	30.5	0	0	0	0
tr|A0A087WWU8|A0A087WWU8_HUMAN;tr|Q5HYB6|Q5HYB6_HUMAN;tr|D6R904|D6R904_HUMAN;tr|H0YL80|H0YL80_HUMAN;tr|B7Z596|B7Z596_HUMAN;tr|J3KPN7|J3KPN7_HUMAN;tr|Q5TCU8|Q5TCU8_HUMAN;sp|P06753|TPM3_HUMAN;tr|J3KN67|J3KN67_HUMAN;tr|Q5TCU3|Q5TCU3_HUMAN;CON__Q3SX28;sp|P07951|TPM2_HUMAN;sp|P09493|TPM1_HUMAN;sp|P67936|TPM4_HUMAN;tr|H0YL52|H0YL52_HUMAN;tr|H0YK48|H0YK48_HUMAN;tr|F5H7S3|F5H7S3_HUMAN;tr|H0YNC7|H0YNC7_HU…	tr|A0A087WWU8|A0A087WWU8_HUMAN;tr|Q5HYB6|Q5HYB6_HUMAN;tr|D6R904|D6R904_HUMAN;tr|H0YL80|H0YL80_HUMAN;tr|B7Z596|B7Z596_HUMAN;tr|J3KPN7|J3KPN7_HUMAN;tr|Q5TCU8|Q5TCU8_HUMAN;sp|P06753|TPM3_HUMAN;tr|J3KN67|J3KN67_HUMAN;tr|Q5TCU3|Q5TCU3_HUMAN;CON__Q3SX28;sp|P07951|TPM2_HUMAN;sp|P09493|TPM1_HUMAN;sp|P67936|TPM4_HUMAN;tr|H0YL52|H0YL52_HUMAN;tr|H0YK48|H0YK48_HUMAN;tr|F5H7S3|F5H7S3_HUMAN;tr|H0YNC7|H0YNC7_HU…	6.87521e-07	1	1	1454500	1	1	1	1	1	2;2;2;1;1;1;1;1;1;1;1;1;1;1;1;1;1;1;1;1;1;1;1;1	2;2;2;1;1;1;1;1;1;1;1;1;1;1;1;1;1;1;1;1;1;1;1;1	2;2;2;1;1;1;1;1;1;1;1;1;1;1;1;1;1;1;1;1;1;1;1;1	tr|A0A087WWU8|A0A087WWU8_HUMAN Tropomyosin alpha-3 chain OS=Homo sapiens GN=TPM3 PE=1 SV=1;tr|Q5HYB6|Q5HYB6_HUMAN Epididymis luminal protein 189 OS=Homo sapiens GN=DKFZp686J1372 PE=1 SV=1;tr|D6R904|D6R904_HUMAN Tropomyosin alpha-3 chain OS=Homo sapiens GN=	24	2	2	2	2	0	0	0	0	0	2	0	0	0	0	0	2	0	0	0	0	0	9.7	9.7	9.7	26.42	227	227;232;95;68;275;763;322;285;285;284;284;284;284;248;265;248;245;223;179;170;157;142;138;980	0	12.332	9.7	0	0	0	0
sp|Q00610|CLH1_HUMAN;tr|A0A087WVQ6|A0A087WVQ6_HUMAN;tr|J3KS13|J3KS13_HUMAN;tr|A0A087WX41|A0A087WX41_HUMAN;sp|P53675|CLH2_HUMAN	sp|Q00610|CLH1_HUMAN;tr|A0A087WVQ6|A0A087WVQ6_HUMAN;tr|J3KS13|J3KS13_HUMAN;tr|A0A087WX41|A0A087WX41_HUMAN;sp|P53675|CLH2_HUMAN	6.96233e-07	1	1	1436300	1	1	1	1	1	2;2;1;1;1	2;2;1;1;1	2;2;1;1;1	sp|Q00610|CLH1_HUMAN Clathrin heavy chain 1 OS=Homo sapiens GN=CLTC PE=1 SV=5;tr|A0A087WVQ6|A0A087WVQ6_HUMAN Clathrin heavy chain OS=Homo sapiens GN=CLTC PE=1 SV=1;tr|J3KS13|J3KS13_HUMAN Clathrin heavy chain 1 OS=Homo sapiens GN=CLTC PE=1 SV=1;tr|A0A087WX4	5	2	2	2	2	0	0	0	0	0	2	0	0	0	0	0	2	0	0	0	0	0	1.4	1.4	1.4	191.61	1675	1675;2317;612;1260;1640	0	12.198	1.4	0	0	0	0
sp|P25205|MCM3_HUMAN	sp|P25205|MCM3_HUMAN	7.15512e-07	1	1	1397600	1	1	1	1	1	1	1	1	sp|P25205|MCM3_HUMAN DNA replication licensing factor MCM3 OS=Homo sapiens GN=MCM3 PE=1 SV=3	1	1	1	1	1	0	0	0	0	0	1	0	0	0	0	0	1	0	0	0	0	0	1.5	1.5	1.5	90.98	808	808	0.0015674	7.4134	1.5	0	0	0	0
tr|D6RHW1|D6RHW1_HUMAN;tr|D6RIY1|D6RIY1_HUMAN;tr|D6RGK3|D6RGK3_HUMAN;tr|D6RIV9|D6RIV9_HUMAN;sp|Q9HBM6|TAF9B_HUMAN;sp|Q16594|TAF9_HUMAN;tr|D6RIE8|D6RIE8_HUMAN	tr|D6RHW1|D6RHW1_HUMAN;tr|D6RIY1|D6RIY1_HUMAN;tr|D6RGK3|D6RGK3_HUMAN;tr|D6RIV9|D6RIV9_HUMAN;sp|Q9HBM6|TAF9B_HUMAN;sp|Q16594|TAF9_HUMAN;tr|D6RIE8|D6RIE8_HUMAN	7.62369e-07	1	1	1311700	1	1	1	1	1	2;2;2;2;2;2;2	2;2;2;2;2;2;2	2;2;2;2;2;2;2	tr|D6RHW1|D6RHW1_HUMAN Adenylate kinase isoenzyme 6 (Fragment) OS=Homo sapiens GN=AK6 PE=1 SV=3;tr|D6RIY1|D6RIY1_HUMAN Adenylate kinase isoenzyme 6 (Fragment) OS=Homo sapiens GN=AK6 PE=1 SV=3;tr|D6RGK3|D6RGK3_HUMAN Adenylate kinase isoenzyme 6 (Fragment) O	7	2	2	2	2	0	0	1	0	0	2	0	0	1	0	0	2	0	0	1	0	0	17.6	17.6	17.6	11.57	102	102;127;136;166;251;264;1197	0	11.312	17.6	0	0	9.8	0
REV__tr|J3QRC9|J3QRC9_HUMAN;REV__tr|J3QSG4|J3QSG4_HUMAN;REV__tr|J3QS14|J3QS14_HUMAN;REV__tr|J3KRB8|J3KRB8_HUMAN;REV__tr|J3QRH8|J3QRH8_HUMAN;REV__sp|Q9H069|LRC48_HUMAN	REV__tr|J3QRC9|J3QRC9_HUMAN;REV__tr|J3QSG4|J3QSG4_HUMAN;REV__tr|J3QS14|J3QS14_HUMAN;REV__tr|J3KRB8|J3KRB8_HUMAN;REV__tr|J3QRH8|J3QRH8_HUMAN;REV__sp|Q9H069|LRC48_HUMAN	8.50919e-07	1	1	1175200	1	1	1	1	1	1;1;1;1;1;1	1;1;1;1;1;1	1;1;1;1;1;1	tr|J3QRC9|J3QRC9_HUMAN Leucine-rich repeat-containing protein 48 (Fragment) OS=Homo sapiens GN=LRRC48 PE=4 SV=1;tr|J3QSG4|J3QSG4_HUMAN Leucine-rich repeat-containing protein 48 (Fragment) OS=Homo sapiens GN=LRRC48 PE=4 SV=1;tr|J3QS14|J3QS14_HUMAN Leucine-r	6	1	1	1	1	0	0	0	0	0	1	0	0	0	0	0	1	0	0	0	0	0	0	0	0	5.6474	51	51;83;102;131;139;523	1	-2	0	0	0	0	0
tr|J3KNE0|J3KNE0_HUMAN;sp|A6NKT7|RGPD3_HUMAN;sp|Q7Z3J3|RGPD4_HUMAN	tr|J3KNE0|J3KNE0_HUMAN;sp|A6NKT7|RGPD3_HUMAN;sp|Q7Z3J3|RGPD4_HUMAN	9.24214e-07	1	1	1082000	1	1	1	1	1	5;5;4	1;1;1	1;1;1	tr|J3KNE0|J3KNE0_HUMAN RanBP2-like and GRIP domain-containing protein 3 OS=Homo sapiens GN=RGPD3 PE=4 SV=2;sp|A6NKT7|RGPD3_HUMAN RanBP2-like and GRIP domain-containing protein 3 OS=Homo sapiens GN=RGPD3 PE=3 SV=2;sp|Q7Z3J3|RGPD4_HUMAN RanBP2-like and GRIP	3	5	1	1	4	0	2	1	1	1	1	0	0	0	0	0	1	0	0	0	0	0	3.2	0.7	0.7	197.62	1760	1760;1758;1758	0.0015601	7.3884	2.6	0	1.4	0.7	0.7
tr|E9PR16|E9PR16_HUMAN;tr|G3V198|G3V198_HUMAN;sp|Q12769|NU160_HUMAN;tr|E9PSI3|E9PSI3_HUMAN	tr|E9PR16|E9PR16_HUMAN;tr|G3V198|G3V198_HUMAN;sp|Q12769|NU160_HUMAN;tr|E9PSI3|E9PSI3_HUMAN	9.56297e-07	1	1	1045700	1	1	1	1	1	2;2;2;1	2;2;2;1	2;2;2;1	tr|E9PR16|E9PR16_HUMAN Nuclear pore complex protein Nup160 (Fragment) OS=Homo sapiens GN=NUP160 PE=1 SV=2;tr|G3V198|G3V198_HUMAN Nuclear pore complex protein Nup160 (Fragment) OS=Homo sapiens GN=NUP160 PE=1 SV=2;sp|Q12769|NU160_HUMAN Nuclear pore complex p	4	2	2	2	1	1	0	0	0	0	1	1	0	0	0	0	1	1	0	0	0	0	2	2	2	127.33	1123	1123;1314;1436;102	0	11.637	0.9	1.1	0	0	0
sp|Q16630|CPSF6_HUMAN;tr|F8WJN3|F8WJN3_HUMAN;tr|F8W084|F8W084_HUMAN	sp|Q16630|CPSF6_HUMAN;tr|F8WJN3|F8WJN3_HUMAN;tr|F8W084|F8W084_HUMAN	1.12387e-06	1	1	889780	1	1	1	1	1	2;2;1	2;2;1	2;2;1	sp|Q16630|CPSF6_HUMAN Cleavage and polyadenylation specificity factor subunit 6 OS=Homo sapiens GN=CPSF6 PE=1 SV=2;tr|F8WJN3|F8WJN3_HUMAN Cleavage and polyadenylation-specificity factor subunit 6 OS=Homo sapiens GN=CPSF6 PE=1 SV=1;tr|F8W084|F8W084_HUMAN Cl	3	2	2	2	1	0	0	1	0	0	1	0	0	1	0	0	1	0	0	1	0	0	4.9	4.9	4.9	59.209	551	551;478;107	0	12.56	2.5	0	0	2.4	0
tr|K7ER90|K7ER90_HUMAN;tr|K7EL20|K7EL20_HUMAN;sp|O75821|EIF3G_HUMAN	tr|K7ER90|K7ER90_HUMAN;tr|K7EL20|K7EL20_HUMAN;sp|O75821|EIF3G_HUMAN	1.2412e-06	1	1	805670	1	1	1	1	1	1;1;1	1;1;1	1;1;1	tr|K7ER90|K7ER90_HUMAN Eukaryotic translation initiation factor 3 subunit G (Fragment) OS=Homo sapiens GN=EIF3G PE=1 SV=1;tr|K7EL20|K7EL20_HUMAN Eukaryotic translation initiation factor 3 subunit G (Fragment) OS=Homo sapiens GN=EIF3G PE=1 SV=5;sp|O75821|EI	3	1	1	1	1	0	0	0	0	0	1	0	0	0	0	0	1	0	0	0	0	0	5.7	5.7	5.7	25.441	227	227;263;320	0.0043924	6.6542	5.7	0	0	0	0
sp|Q9Y6Y0|NS1BP_HUMAN	sp|Q9Y6Y0|NS1BP_HUMAN	1.27324e-06	1	1	785400	1	1	1	1	1	1	1	1	sp|Q9Y6Y0|NS1BP_HUMAN Influenza virus NS1A-binding protein OS=Homo sapiens GN=IVNS1ABP PE=1 SV=3	1	1	1	1	1	0	0	0	0	0	1	0	0	0	0	0	1	0	0	0	0	0	2	2	2	71.729	642	642	0.0029369	6.681	2	0	0	0	0
tr|R4GMX7|R4GMX7_HUMAN;tr|R4GNA3|R4GNA3_HUMAN;tr|R4GN91|R4GN91_HUMAN;sp|Q6VN20|RBP10_HUMAN;tr|R4GMX8|R4GMX8_HUMAN;tr|A0A0D9SEU5|A0A0D9SEU5_HUMAN	tr|R4GMX7|R4GMX7_HUMAN;tr|R4GNA3|R4GNA3_HUMAN;tr|R4GN91|R4GN91_HUMAN;sp|Q6VN20|RBP10_HUMAN;tr|R4GMX8|R4GMX8_HUMAN;tr|A0A0D9SEU5|A0A0D9SEU5_HUMAN	1.46854e-06	1	1	680950	1	1	1	1	1	1;1;1;1;1;1	1;1;1;1;1;1	1;1;1;1;1;1	tr|R4GMX7|R4GMX7_HUMAN Ran-binding protein 10 OS=Homo sapiens GN=RANBP10 PE=1 SV=1;tr|R4GNA3|R4GNA3_HUMAN Ran-binding protein 10 OS=Homo sapiens GN=RANBP10 PE=1 SV=1;tr|R4GN91|R4GN91_HUMAN Ran-binding protein 10 OS=Homo sapiens GN=RANBP10 PE=1 SV=1;sp|Q6VN	6	1	1	1	1	0	0	0	0	0	1	0	0	0	0	0	1	0	0	0	0	0	17.1	17.1	17.1	8.7355	82	82;126;149;620;650;924	0.0057887	6.5809	17.1	0	0	0	0
tr|H0Y470|H0Y470_HUMAN;tr|H0Y7U8|H0Y7U8_HUMAN;tr|H7C2C6|H7C2C6_HUMAN;sp|Q3V6T2|GRDN_HUMAN	tr|H0Y470|H0Y470_HUMAN;tr|H0Y7U8|H0Y7U8_HUMAN;tr|H7C2C6|H7C2C6_HUMAN;sp|Q3V6T2|GRDN_HUMAN	1.65467e-06	1	1	604350	1	1	1	1	1	1;1;1;1	1;1;1;1	1;1;1;1	tr|H0Y470|H0Y470_HUMAN Girdin (Fragment) OS=Homo sapiens GN=CCDC88A PE=1 SV=1;tr|H0Y7U8|H0Y7U8_HUMAN Girdin (Fragment) OS=Homo sapiens GN=CCDC88A PE=1 SV=5;tr|H7C2C6|H7C2C6_HUMAN Girdin (Fragment) OS=Homo sapiens GN=CCDC88A PE=1 SV=1;sp|Q3V6T2|GRDN_HUMAN G	4	1	1	1	1	0	0	0	0	0	1	0	0	0	0	0	1	0	0	0	0	0	1.4	1.4	1.4	100.58	888	888;940;1202;1871	0.0057225	6.5454	1.4	0	0	0	0
tr|H3BMN1|H3BMN1_HUMAN;tr|H3BP33|H3BP33_HUMAN;tr|H3BTJ0|H3BTJ0_HUMAN;sp|Q9BUV0|RSRP1_HUMAN	tr|H3BMN1|H3BMN1_HUMAN;tr|H3BP33|H3BP33_HUMAN;tr|H3BTJ0|H3BTJ0_HUMAN;sp|Q9BUV0|RSRP1_HUMAN	1	1	1	1	1	1	1	1	1	1;1;1;1	1;1;1;1	1;1;1;1	tr|H3BMN1|H3BMN1_HUMAN Arginine/serine-rich protein 1 (Fragment) OS=Homo sapiens GN=RSRP1 PE=1 SV=1;tr|H3BP33|H3BP33_HUMAN Arginine/serine-rich protein 1 (Fragment) OS=Homo sapiens GN=RSRP1 PE=1 SV=1;tr|H3BTJ0|H3BTJ0_HUMAN Arginine/serine-rich protein 1 OS	4	1	1	1	1	0	0	0	0	0	1	0	0	0	0	0	1	0	0	0	0	0	11.9	11.9	11.9	9.3114	84	84;183;226;290	0.0094723	6.2212	11.9	0	0	0	0
sp|P0DMV9|HS71B_HUMAN;sp|P0DMV8|HS71A_HUMAN;tr|A0A0G2JIW1|A0A0G2JIW1_HUMAN;tr|V9GZ37|V9GZ37_HUMAN	sp|P0DMV9|HS71B_HUMAN;sp|P0DMV8|HS71A_HUMAN;tr|A0A0G2JIW1|A0A0G2JIW1_HUMAN;tr|V9GZ37|V9GZ37_HUMAN	0.602718	1.15833	0.979107	142360000	65728000	75672000	85803000	76135000	74091000	21;21;21;12	18;18;18;10	10;10;10;5	sp|P0DMV9|HS71B_HUMAN Heat shock 70 kDa protein 1B OS=Homo sapiens GN=HSPA1B PE=1 SV=1;sp|P0DMV8|HS71A_HUMAN Heat shock 70 kDa protein 1A OS=Homo sapiens GN=HSPA1A PE=1 SV=1;tr|A0A0G2JIW1|A0A0G2JIW1_HUMAN Heat shock 70 kDa protein 1B OS=Homo sapiens GN=HSP	4	21	18	10	20	12	10	17	12	11	17	11	9	15	11	10	10	7	5	8	5	6	33.4	30	13.3	70.051	641	641;641;642;476	0	146.94	29.8	20.6	17	27.1	24.2
sp|O43813|LANC1_HUMAN;tr|V9P921|V9P921_HUMAN;tr|H0YHL2|H0YHL2_HUMAN	sp|O43813|LANC1_HUMAN;tr|V9P921|V9P921_HUMAN;tr|H0YHL2|H0YHL2_HUMAN	0.481432	0.592122	0.834203	34549000	15791000	17244000	16633000	9350200	14385000	7;7;4	7;7;4	7;7;4	sp|O43813|LANC1_HUMAN LanC-like protein 1 OS=Homo sapiens GN=LANCL1 PE=1 SV=1;tr|V9P921|V9P921_HUMAN Interferon regulatory factor 1 OS=Homo sapiens GN=IRF1 PE=1 SV=1;tr|H0YHL2|H0YHL2_HUMAN Bromodomain adjacent to zinc finger domain protein 2A (Fragment) OS	3	7	7	7	7	4	5	4	3	6	7	4	5	4	3	6	7	4	5	4	3	6	8.2	8.2	8.2	189.44	1743	1743;717;511	0	54.066	8.2	5	5.2	5	3.2
tr|E9PBF6|E9PBF6_HUMAN;sp|P20700|LMNB1_HUMAN;tr|F5H5P2|F5H5P2_HUMAN;tr|A0A0D9SFY5|A0A0D9SFY5_HUMAN	tr|E9PBF6|E9PBF6_HUMAN;sp|P20700|LMNB1_HUMAN;tr|F5H5P2|F5H5P2_HUMAN;tr|A0A0D9SFY5|A0A0D9SFY5_HUMAN	0.984155	0.728661	0.804954	29600000	10052000	10759000	29131000	7324500	8660500	14;14;13;7	14;14;13;7	14;14;13;7	tr|E9PBF6|E9PBF6_HUMAN Lamin-B1 OS=Homo sapiens GN=LMNB1 PE=1 SV=1;sp|P20700|LMNB1_HUMAN Lamin-B1 OS=Homo sapiens GN=LMNB1 PE=1 SV=2;tr|F5H5P2|F5H5P2_HUMAN Uncharacterized protein OS=Homo sapiens PE=4 SV=1;tr|A0A0D9SFY5|A0A0D9SFY5_HUMAN Lamin-B1 (Fragment)	4	14	14	14	10	2	2	9	4	2	10	2	2	9	4	2	10	2	2	9	4	2	35.9	35.9	35.9	44.643	387	387;586;891;166	0	99.956	28.4	5.9	6.2	26.4	9.8
sp|Q13838|DX39B_HUMAN;tr|Q5STU3|Q5STU3_HUMAN;tr|F6WLT2|F6WLT2_HUMAN;tr|A0A0G2JJZ9|A0A0G2JJZ9_HUMAN;tr|A0A0A0MT12|A0A0A0MT12_HUMAN;tr|F6TRA5|F6TRA5_HUMAN;tr|F6S4E6|F6S4E6_HUMAN;tr|F6UJC5|F6UJC5_HUMAN;tr|F6R6M7|F6R6M7_HUMAN;tr|F6QYI9|F6QYI9_HUMAN;tr|A0A0G2JJL7|A0A0G2JJL7_HUMAN;tr|H0Y400|H0Y400_HUMAN;tr|A0A0G2JHN7|A0A0G2JHN7_HUMAN;tr|F6U6E2|F6U6E2_HUMAN;tr|F6S2B7|F6S2B7_HUMAN;tr|H0YCC6|H0YCC6_HUMAN	sp|Q13838|DX39B_HUMAN;tr|Q5STU3|Q5STU3_HUMAN;tr|F6WLT2|F6WLT2_HUMAN;tr|A0A0G2JJZ9|A0A0G2JJZ9_HUMAN;tr|A0A0A0MT12|A0A0A0MT12_HUMAN;tr|F6TRA5|F6TRA5_HUMAN;tr|F6S4E6|F6S4E6_HUMAN;tr|F6UJC5|F6UJC5_HUMAN	1.10417	0.607306	0.745214	84419000	92767000	72716000	93213000	56338000	54189000	14;13;11;11;9;9;8;7;6;5;5;4;3;3;3;3	14;13;11;11;9;9;8;7;6;5;5;4;3;3;3;3	6;6;5;5;4;4;3;4;3;2;2;1;1;1;1;2	sp|Q13838|DX39B_HUMAN Spliceosome RNA helicase DDX39B OS=Homo sapiens GN=DDX39B PE=1 SV=1;tr|Q5STU3|Q5STU3_HUMAN Spliceosome RNA helicase DDX39B OS=Homo sapiens GN=DDX39B PE=1 SV=2;tr|F6WLT2|F6WLT2_HUMAN Spliceosome RNA helicase DDX39B (Fragment) OS=Homo s	16	14	14	6	9	4	6	7	10	11	9	4	6	7	10	11	3	1	2	1	4	5	39.7	39.7	20.8	48.991	428	428;823;289;328;236;238;231;245;197;187;187;187;96;125;132;141	0	118.57	23.4	10.7	17.3	16.4	28.5
sp|Q92769|HDAC2_HUMAN;tr|E5RFI6|E5RFI6_HUMAN;tr|E5RJ04|E5RJ04_HUMAN;tr|E5RGV4|E5RGV4_HUMAN;tr|E5RHE7|E5RHE7_HUMAN;tr|E5RH52|E5RH52_HUMAN;tr|E5RG37|E5RG37_HUMAN;tr|E5RFP9|E5RFP9_HUMAN;tr|H3BM24|H3BM24_HUMAN;tr|E5RK19|E5RK19_HUMAN;tr|E7ESJ6|E7ESJ6_HUMAN;sp|O15379|HDAC3_HUMAN	sp|Q92769|HDAC2_HUMAN	0.610783	0.57846	0.732013	20143000	22897000	14997000	12303000	13245000	10978000	9;3;3;3;3;3;3;3;3;2;1;1	9;3;3;3;3;3;3;3;3;2;1;1	5;1;1;1;1;1;1;1;1;1;0;0	sp|Q92769|HDAC2_HUMAN Histone deacetylase 2 OS=Homo sapiens GN=HDAC2 PE=1 SV=2	12	9	9	5	8	3	3	5	5	3	8	3	3	5	5	3	4	2	1	2	3	1	23.8	23.8	14.5	55.364	488	488;60;65;71;86;100;103;109;161;52;219;428	0	68.485	21.9	10	9	14.1	14.5
sp|Q9NYL9|TMOD3_HUMAN;tr|H0YKU1|H0YKU1_HUMAN;tr|H0YNJ8|H0YNJ8_HUMAN;sp|Q9NZR1|TMOD2_HUMAN;tr|D6R933|D6R933_HUMAN	sp|Q9NYL9|TMOD3_HUMAN;tr|H0YKU1|H0YKU1_HUMAN;tr|H0YNJ8|H0YNJ8_HUMAN	0.496584	0.344992	0.700568	28249000	11491000	8034200	14028000	3964300	5628500	10;8;8;1;1	10;8;8;1;1	10;8;8;1;1	sp|Q9NYL9|TMOD3_HUMAN Tropomodulin-3 OS=Homo sapiens GN=TMOD3 PE=1 SV=1;tr|H0YKU1|H0YKU1_HUMAN Tropomodulin-3 (Fragment) OS=Homo sapiens GN=TMOD3 PE=1 SV=1;tr|H0YNJ8|H0YNJ8_HUMAN Tropomodulin-3 OS=Homo sapiens GN=TMOD3 PE=1 SV=1	5	10	10	10	10	3	2	5	2	2	10	3	2	5	2	2	10	3	2	5	2	2	29.5	29.5	29.5	39.594	352	352;187;617;351;939	0	79.975	29.5	11.9	7.1	15.6	7.7
tr|Q5T6W2|Q5T6W2_HUMAN	tr|Q5T6W2|Q5T6W2_HUMAN	1.10406	0.811237	0.637791	875970000	348850000	416390000	967120000	283000000	265570000	24	24	1	tr|Q5T6W2|Q5T6W2_HUMAN Heterogeneous nuclear ribonucleoprotein K (Fragment) OS=Homo sapiens GN=HNRNPK PE=1 SV=1	1	24	24	1	19	12	12	21	19	15	19	12	12	21	19	15	1	0	0	1	0	0	41.1	41.1	2.1	61.755	584	584	0	314.47	33.4	24.1	22.1	38.4	34.9
sp|Q5UIP0|RIF1_HUMAN;tr|H7C2B5|H7C2B5_HUMAN;tr|H7BZN3|H7BZN3_HUMAN	sp|Q5UIP0|RIF1_HUMAN;tr|H7C2B5|H7C2B5_HUMAN	0.424215	0.794647	0.624155	78116000	15729000	18199000	33138000	12499000	11359000	21;11;4	21;11;4	21;11;4	sp|Q5UIP0|RIF1_HUMAN Telomere-associated protein RIF1 OS=Homo sapiens GN=RIF1 PE=1 SV=2;tr|H7C2B5|H7C2B5_HUMAN Telomere-associated protein RIF1 (Fragment) OS=Homo sapiens GN=RIF1 PE=1 SV=1	3	21	21	21	19	5	5	9	5	4	19	5	5	9	5	4	19	5	5	9	5	4	12.5	12.5	12.5	274.46	2472	2472;746;845	0	194.81	11.7	2.8	2.8	5.1	3.2
tr|E9PKG1|E9PKG1_HUMAN;sp|Q99873|ANM1_HUMAN;tr|H7C2I1|H7C2I1_HUMAN;tr|E9PQ98|E9PQ98_HUMAN;tr|E9PIX6|E9PIX6_HUMAN;tr|E9PNR9|E9PNR9_HUMAN;tr|H0YDE4|H0YDE4_HUMAN;tr|A0A087X1W2|A0A087X1W2_HUMAN;sp|Q9NR22|ANM8_HUMAN	tr|E9PKG1|E9PKG1_HUMAN;sp|Q99873|ANM1_HUMAN;tr|H7C2I1|H7C2I1_HUMAN;tr|E9PQ98|E9PQ98_HUMAN;tr|E9PIX6|E9PIX6_HUMAN;tr|E9PNR9|E9PNR9_HUMAN;tr|H0YDE4|H0YDE4_HUMAN;tr|A0A087X1W2|A0A087X1W2_HUMAN	1.47779	0.497281	0.622314	52915000	61241000	45101000	78197000	30454000	28067000	11;11;11;8;8;7;7;6;3	11;11;11;8;8;7;7;6;3	11;11;11;8;8;7;7;6;3	tr|E9PKG1|E9PKG1_HUMAN Protein arginine N-methyltransferase 1 OS=Homo sapiens GN=PRMT1 PE=1 SV=1;sp|Q99873|ANM1_HUMAN Protein arginine N-methyltransferase 1 OS=Homo sapiens GN=PRMT1 PE=1 SV=2;tr|H7C2I1|H7C2I1_HUMAN Protein arginine N-methyltransferase 1 OS	9	11	11	11	9	6	5	9	6	5	9	6	5	9	6	5	9	6	5	9	6	5	31.7	31.7	31.7	37.709	325	325;361;371;205;209;160;238;285;394	0	95.981	28.3	24	16	26.2	20.9
sp|P08670|VIME_HUMAN;tr|B0YJC4|B0YJC4_HUMAN;tr|B0YJC5|B0YJC5_HUMAN;tr|Q5JVS8|Q5JVS8_HUMAN;sp|P17661|DESM_HUMAN;sp|P41219|PERI_HUMAN;tr|H7C5W5|H7C5W5_HUMAN;sp|P14136|GFAP_HUMAN;tr|K7EKH9|K7EKH9_HUMAN;tr|K7EKH6|K7EKH6_HUMAN;tr|K7EJU1|K7EJU1_HUMAN;tr|B4DIR1|B4DIR1_HUMAN;CON__Q61726;tr|F8W835|F8W835_HUMAN;CON__P78385;CON__Q6NT21;CON__Q14533;CON__P78386;tr|K7ELP4|K7ELP4_HUMAN;tr|F8VW96|F8VW96_HUMAN;sp…	sp|P08670|VIME_HUMAN;tr|B0YJC4|B0YJC4_HUMAN	1.53407	0.913414	0.618114	814370000	526530000	648990000	1249300000	480940000	401150000	44;41;19;13;5;4;4;2;1;1;1;1;1;1;1;1;1;1;1;1;1;1	41;38;19;13;3;2;2;1;0;1;0;0;0;1;0;0;0;0;0;0;1;0	40;37;18;13;2;2;2;1;0;1;0;0;0;1;0;0;0;0;0;0;0;0	sp|P08670|VIME_HUMAN Vimentin OS=Homo sapiens GN=VIM PE=1 SV=4;tr|B0YJC4|B0YJC4_HUMAN Vimentin OS=Homo sapiens GN=VIM PE=1 SV=1	22	44	41	40	38	27	20	40	28	28	35	24	20	38	27	28	34	23	19	37	27	28	71.9	68.5	66.5	53.651	466	466;605;1265;173;470;470;200;432;261;191;248;179;479;207;493;493;505;507;189;816;1026;486	0	323.31	68.2	56.7	41.6	70.4	48.1
tr|E7ESY4|E7ESY4_HUMAN;sp|Q13330|MTA1_HUMAN;tr|H0Y4T7|H0Y4T7_HUMAN;tr|F8VSM3|F8VSM3_HUMAN;tr|F8W9Y9|F8W9Y9_HUMAN;tr|H7C3F3|H7C3F3_HUMAN	tr|E7ESY4|E7ESY4_HUMAN;sp|Q13330|MTA1_HUMAN;tr|H0Y4T7|H0Y4T7_HUMAN	1.9107	2.42383e-07	0.617775	4314800	4125700	6719600	8244300	1	4151200	7;7;5;3;3;1	6;6;4;2;3;1	6;6;4;2;3;1	tr|E7ESY4|E7ESY4_HUMAN Metastasis-associated protein MTA1 OS=Homo sapiens GN=MTA1 PE=1 SV=1;sp|Q13330|MTA1_HUMAN Metastasis-associated protein MTA1 OS=Homo sapiens GN=MTA1 PE=1 SV=2;tr|H0Y4T7|H0Y4T7_HUMAN Metastasis-associated protein MTA1 (Fragment) OS=Ho	6	7	6	6	4	3	2	6	0	3	3	2	2	5	0	3	3	2	2	5	0	3	11.7	10.2	10.2	79.372	703	703;715;511;228;255;55	0	39.532	6.7	5	3.6	10.2	0
sp|Q15208|STK38_HUMAN	sp|Q15208|STK38_HUMAN	0.591895	0.276503	0.549674	133860000	97764000	59055000	79231000	27032000	32461000	15	15	14	sp|Q15208|STK38_HUMAN Serine/threonine-protein kinase 38 OS=Homo sapiens GN=STK38 PE=1 SV=1	1	15	15	14	12	7	4	11	5	5	12	7	4	11	5	5	11	7	4	10	5	5	40.6	40.6	39.1	54.19	465	465	0	131.17	34	20.4	11	30.8	14.6
tr|F8W0Q9|F8W0Q9_HUMAN;sp|Q8NEY8|PPHLN_HUMAN;tr|F8WF16|F8WF16_HUMAN;tr|F8W6A0|F8W6A0_HUMAN;tr|B7Z8L1|B7Z8L1_HUMAN;tr|F8VPY7|F8VPY7_HUMAN;tr|F8VWU8|F8VWU8_HUMAN;tr|F8VRK2|F8VRK2_HUMAN;tr|F8VXV7|F8VXV7_HUMAN;REV__tr|K7EN69|K7EN69_HUMAN	tr|F8W0Q9|F8W0Q9_HUMAN;sp|Q8NEY8|PPHLN_HUMAN;tr|F8WF16|F8WF16_HUMAN;tr|F8W6A0|F8W6A0_HUMAN;tr|B7Z8L1|B7Z8L1_HUMAN	0.509326	1	0.549382	46267000	1	10111000	23565000	1	5554800	9;8;5;5;5;4;4;3;1;1	9;8;5;5;5;4;4;3;1;1	9;8;5;5;5;4;4;3;1;1	tr|F8W0Q9|F8W0Q9_HUMAN Periphilin-1 OS=Homo sapiens GN=PPHLN1 PE=1 SV=1;sp|Q8NEY8|PPHLN_HUMAN Periphilin-1 OS=Homo sapiens GN=PPHLN1 PE=1 SV=2;tr|F8WF16|F8WF16_HUMAN Periphilin-1 OS=Homo sapiens GN=PPHLN1 PE=1 SV=1;tr|F8W6A0|F8W6A0_HUMAN Periphilin-1 OS=Ho	10	9	9	9	8	3	3	7	2	4	8	3	3	7	2	4	8	3	3	7	2	4	22.9	22.9	22.9	44.682	385	385;458;303;363;770;161;168;107;37;130	0	57.662	20.3	9.9	7	18.2	6
sp|Q8WWY3|PRP31_HUMAN;tr|E7EVX8|E7EVX8_HUMAN;tr|E7EU94|E7EU94_HUMAN;tr|E7ESX0|E7ESX0_HUMAN;tr|E7EN72|E7EN72_HUMAN	sp|Q8WWY3|PRP31_HUMAN;tr|E7EVX8|E7EVX8_HUMAN	0.534086	0.839781	0.514741	81191000	16103000	28391000	43363000	13523000	14614000	11;10;4;4;4	11;10;4;4;4	11;10;4;4;4	sp|Q8WWY3|PRP31_HUMAN U4/U6 small nuclear ribonucleoprotein Prp31 OS=Homo sapiens GN=PRPF31 PE=1 SV=2;tr|E7EVX8|E7EVX8_HUMAN U4/U6 small nuclear ribonucleoprotein Prp31 OS=Homo sapiens GN=PRPF31 PE=1 SV=1	5	11	11	11	11	4	4	8	7	7	11	4	4	8	7	7	11	4	4	8	7	7	24.4	24.4	24.4	55.455	499	499;493;261;276;284	0	93.994	24.4	9.4	9.8	15	18.2
sp|Q8IWI9|MGAP_HUMAN;tr|J3QT83|J3QT83_HUMAN;tr|H3BP52|H3BP52_HUMAN;tr|H3BTF4|H3BTF4_HUMAN;sp|Q05707|COEA1_HUMAN	sp|Q8IWI9|MGAP_HUMAN	0.96679	0.555966	0.513552	189100000	89849000	109650000	182820000	49953000	56311000	44;1;1;1;1	44;1;1;1;1	23;0;1;1;0	sp|Q8IWI9|MGAP_HUMAN MAX gene-associated protein OS=Homo sapiens GN=MGA PE=1 SV=3	5	44	44	23	34	14	11	30	14	16	34	14	11	30	14	16	18	7	6	15	7	7	9.3	9.3	5.2	620.91	5620	5620;843;1086;1524;1796	0	323.31	7.7	3.5	2.7	6.3	3.7
sp|O14744|ANM5_HUMAN;tr|G3V580|G3V580_HUMAN;tr|H0YJX6|H0YJX6_HUMAN;tr|G3V5L5|G3V5L5_HUMAN;tr|G3V2L6|G3V2L6_HUMAN;tr|G3V2X6|G3V2X6_HUMAN;tr|C9JSX3|C9JSX3_HUMAN;tr|H0YJD3|H0YJD3_HUMAN;tr|H0YJ77|H0YJ77_HUMAN;tr|H7BZ44|H7BZ44_HUMAN;tr|G3V507|G3V507_HUMAN;tr|G3V2F5|G3V2F5_HUMAN;tr|G3V5T6|G3V5T6_HUMAN	sp|O14744|ANM5_HUMAN;tr|G3V580|G3V580_HUMAN	1.11865	0.437001	0.491891	478800000	394530000	387850000	535610000	172410000	190780000	22;11;9;8;7;7;7;5;3;3;2;2;1	22;11;9;8;7;7;7;5;3;3;2;2;1	22;11;9;8;7;7;7;5;3;3;2;2;1	sp|O14744|ANM5_HUMAN Protein arginine N-methyltransferase 5 OS=Homo sapiens GN=PRMT5 PE=1 SV=4;tr|G3V580|G3V580_HUMAN Protein arginine N-methyltransferase 5 (Fragment) OS=Homo sapiens GN=PRMT5 PE=1 SV=1	13	22	22	22	18	15	10	18	13	9	18	15	10	18	13	9	18	15	10	18	13	9	34.4	34.4	34.4	72.683	637	637;180;279;170;183;185;186;177;138;179;42;86;104	0	201.45	30.6	28.9	19.2	27.5	23.5
sp|O15269|SPTC1_HUMAN;tr|A0A0D9SER6|A0A0D9SER6_HUMAN;tr|A0A0D9SG83|A0A0D9SG83_HUMAN;tr|A0A0G2JNM9|A0A0G2JNM9_HUMAN;tr|K7ELU0|K7ELU0_HUMAN;tr|C9JY79|C9JY79_HUMAN	sp|O15269|SPTC1_HUMAN;tr|A0A0D9SER6|A0A0D9SER6_HUMAN	0.587958	0.24132	0.460937	539120000	102300000	74726000	316980000	24687000	34444000	101;88;5;2;2;2	101;88;5;2;2;2	4;0;0;0;0;0	sp|O15269|SPTC1_HUMAN Serine palmitoyltransferase 1 OS=Homo sapiens GN=SPTLC1 PE=1 SV=1;tr|A0A0D9SER6|A0A0D9SER6_HUMAN Zinc finger protein 630 (Fragment) OS=Homo sapiens GN=ZNF630 PE=4 SV=1	6	101	101	4	81	36	19	65	14	13	81	36	19	65	14	13	4	1	0	2	0	0	9.4	9.4	0.6	1346.9	11934	11934;2798;410;693;2164;2564	0	323.31	8	3.9	2	6.2	1.5
sp|Q9Y2H1|ST38L_HUMAN;tr|F5H7Z3|F5H7Z3_HUMAN;tr|F5GY51|F5GY51_HUMAN;tr|F5H277|F5H277_HUMAN;tr|I3L0D0|I3L0D0_HUMAN;tr|F5H5E6|F5H5E6_HUMAN;tr|F5H0V1|F5H0V1_HUMAN;tr|H0YGN4|H0YGN4_HUMAN	sp|Q9Y2H1|ST38L_HUMAN	0.905835	0.361156	0.457378	38645000	27927000	27474000	35006000	10086000	12566000	11;5;5;4;3;2;2;1	10;4;4;4;2;2;2;1	10;4;4;4;2;2;2;1	sp|Q9Y2H1|ST38L_HUMAN Serine/threonine-protein kinase 38-like OS=Homo sapiens GN=STK38L PE=1 SV=3	8	11	10	10	9	5	3	5	4	3	8	5	3	4	4	3	8	5	3	4	4	3	30	28.4	28.4	54.002	464	464;94;1326;214;338;56;64;87	0	69.566	25.9	12.9	8.6	12.5	11
tr|F8VSC5|F8VSC5_HUMAN;sp|Q6P3W7|SCYL2_HUMAN;tr|F8VPW3|F8VPW3_HUMAN;tr|H0YIK6|H0YIK6_HUMAN	tr|F8VSC5|F8VSC5_HUMAN;sp|Q6P3W7|SCYL2_HUMAN	0.839713	0.760155	0.432048	19646000	11256000	20700000	16497000	8556300	8943400	10;10;1;1	10;10;1;1	10;10;1;1	tr|F8VSC5|F8VSC5_HUMAN SCY1-like protein 2 (Fragment) OS=Homo sapiens GN=SCYL2 PE=1 SV=1;sp|Q6P3W7|SCYL2_HUMAN SCY1-like protein 2 OS=Homo sapiens GN=SCYL2 PE=1 SV=1	4	10	10	10	9	5	4	6	3	4	9	5	4	6	3	4	9	5	4	6	3	4	18.1	18.1	18.1	77.053	681	681;929;76;115	0	76.275	15.9	10.3	8.7	12.6	6
sp|Q9NYF8|BCLF1_HUMAN;tr|E9PQN2|E9PQN2_HUMAN;tr|E9PKI6|E9PKI6_HUMAN;tr|E9PK09|E9PK09_HUMAN;tr|E9PJA7|E9PJA7_HUMAN;tr|H0YF14|H0YF14_HUMAN;tr|H0YF00|H0YF00_HUMAN	sp|Q9NYF8|BCLF1_HUMAN;tr|E9PQN2|E9PQN2_HUMAN;tr|E9PKI6|E9PKI6_HUMAN;tr|E9PK09|E9PK09_HUMAN	1.03637	0.52672	0.428907	1201700000	696120000	753450000	1245400000	366660000	323160000	40;31;31;29;12;9;3	39;31;31;29;12;8;3	1;0;0;0;0;1;0	sp|Q9NYF8|BCLF1_HUMAN Bcl-2-associated transcription factor 1 OS=Homo sapiens GN=BCLAF1 PE=1 SV=2;tr|E9PQN2|E9PQN2_HUMAN Bcl-2-associated transcription factor 1 OS=Homo sapiens GN=BCLAF1 PE=1 SV=1;tr|E9PKI6|E9PKI6_HUMAN Bcl-2-associated transcription facto	7	40	39	1	30	21	19	30	22	19	29	20	18	30	21	18	0	1	1	0	0	0	35	33.8	1.7	106.12	920	920;750;752;726;467;187;118	0	323.31	29.2	23.3	20.5	27.5	22.7
sp|Q9Y657|SPIN1_HUMAN	sp|Q9Y657|SPIN1_HUMAN	1.07789	0.323019	0.412962	89206000	75169000	116800000	96154000	24281000	48234000	10	10	7	sp|Q9Y657|SPIN1_HUMAN Spindlin-1 OS=Homo sapiens GN=SPIN1 PE=1 SV=3	1	10	10	7	8	8	6	7	6	4	8	8	6	7	6	4	5	6	4	5	5	3	48.5	48.5	35.1	29.6	262	262	0	105.51	42	40.5	29	39.3	36.3
sp|Q9Y2W1|TR150_HUMAN	sp|Q9Y2W1|TR150_HUMAN	0.612759	0.440559	0.394388	1288500000	654600000	715260000	789540000	288390000	282090000	41	41	40	sp|Q9Y2W1|TR150_HUMAN Thyroid hormone receptor-associated protein 3 OS=Homo sapiens GN=THRAP3 PE=1 SV=2	1	41	41	40	28	26	26	25	28	23	28	26	26	25	28	23	27	25	25	25	27	22	37.4	37.4	37.4	108.66	955	955	0	323.31	31.1	24.1	22	24.3	29.3
sp|P23588|IF4B_HUMAN;tr|E7EX17|E7EX17_HUMAN;tr|F8VX11|F8VX11_HUMAN;tr|F8VP89|F8VP89_HUMAN;tr|F8VSC7|F8VSC7_HUMAN;tr|F8W0K0|F8W0K0_HUMAN;tr|F8VYE9|F8VYE9_HUMAN;tr|F8VRU1|F8VRU1_HUMAN;REV__tr|F8VX11|F8VX11_HUMAN;REV__sp|P23588|IF4B_HUMAN;REV__tr|E7EX17|E7EX17_HUMAN	sp|P23588|IF4B_HUMAN;tr|E7EX17|E7EX17_HUMAN	0.67851	0.307422	0.382583	1265700000	648490000	507210000	858790000	199360000	194050000	43;43;20;17;13;12;7;5;2;2;2	43;43;20;17;13;12;7;5;2;2;2	43;43;20;17;13;12;7;5;2;2;2	sp|P23588|IF4B_HUMAN Eukaryotic translation initiation factor 4B OS=Homo sapiens GN=EIF4B PE=1 SV=2;tr|E7EX17|E7EX17_HUMAN Eukaryotic translation initiation factor 4B OS=Homo sapiens GN=EIF4B PE=1 SV=1	11	43	43	43	37	17	17	32	20	16	37	17	17	32	20	16	37	17	17	32	20	16	52.2	52.2	52.2	69.15	611	611;616;360;275;227;170;185;175;360;611;616	0	323.31	47	29.8	25.9	43.7	32.1
sp|Q9BUA3|CK084_HUMAN;tr|H0YGY5|H0YGY5_HUMAN;tr|H0YGK9|H0YGK9_HUMAN	sp|Q9BUA3|CK084_HUMAN	1.17262	0.475081	0.367193	60520000	40532000	54775000	70967000	19256000	20113000	10;3;2	10;3;2	10;3;2	sp|Q9BUA3|CK084_HUMAN Uncharacterized protein C11orf84 OS=Homo sapiens GN=C11orf84 PE=1 SV=3	3	10	10	10	6	6	4	6	5	3	6	6	4	6	5	3	6	6	4	6	5	3	39.9	39.9	39.9	41.036	381	381;112;29	0	77.963	22	24.1	15	23.6	24.4
sp|O00268|TAF4_HUMAN;tr|A0A0G2JRY5|A0A0G2JRY5_HUMAN;tr|V9GY14|V9GY14_HUMAN;tr|V9GY03|V9GY03_HUMAN;sp|Q92750|TAF4B_HUMAN;tr|A0A0A0MSA8|A0A0A0MSA8_HUMAN	sp|O00268|TAF4_HUMAN;tr|A0A0G2JRY5|A0A0G2JRY5_HUMAN	0.654689	0.389387	0.353581	757810000	409310000	410740000	496130000	159380000	145230000	32;21;5;4;1;1	32;21;5;4;1;1	31;20;5;3;0;0	sp|O00268|TAF4_HUMAN Transcription initiation factor TFIID subunit 4 OS=Homo sapiens GN=TAF4 PE=1 SV=2;tr|A0A0G2JRY5|A0A0G2JRY5_HUMAN Transcription initiation factor TFIID subunit 4 (Fragment) OS=Homo sapiens GN=TAF4 PE=4 SV=1	6	32	32	31	30	18	17	24	16	13	30	18	17	24	16	13	29	17	16	23	15	12	37.5	37.5	36.3	110.11	1085	1085;457;215;696;862;865	0	323.31	33.8	26.7	22.5	27.5	23.9
tr|A0A0G2JM46|A0A0G2JM46_HUMAN;tr|A0A0G2JMJ3|A0A0G2JMJ3_HUMAN;sp|Q6ZW35|F231D_HUMAN;tr|Q7Z6E1|Q7Z6E1_HUMAN;tr|I3L1B9|I3L1B9_HUMAN;tr|D6RBV3|D6RBV3_HUMAN;tr|E9PKX0|E9PKX0_HUMAN;tr|Q8WYK7|Q8WYK7_HUMAN;sp|P0DMU3|F231L_HUMAN;tr|K4DI94|K4DI94_HUMAN;tr|A6NDI8|A6NDI8_HUMAN	tr|A0A0G2JM46|A0A0G2JM46_HUMAN;tr|A0A0G2JMJ3|A0A0G2JMJ3_HUMAN;sp|Q6ZW35|F231D_HUMAN;tr|Q7Z6E1|Q7Z6E1_HUMAN	0.288812	4.00336e-08	0.342678	40490000	24979000	19900000	11694000	1	6819300	14;14;14;13;3;1;1;1;1;1;1	14;14;14;13;3;1;1;1;1;1;1	11;11;11;10;2;1;0;0;0;0;0	tr|A0A0G2JM46|A0A0G2JM46_HUMAN Leukocyte immunoglobulin-like receptor subfamily B member 3 OS=Homo sapiens GN=LILRB3 PE=4 SV=1;tr|A0A0G2JMJ3|A0A0G2JMJ3_HUMAN Natural cytotoxicity triggering receptor 1 (Fragment) OS=Homo sapiens GN=NCR1 PE=4 SV=1;sp|Q6ZW35|	11	14	14	11	14	4	3	4	1	3	14	4	3	4	1	3	11	2	1	3	0	1	12.2	12.2	9.6	137.76	1254	1254;1344;1374;1162;303;499;602;610;745;865;1415	0	95.535	12.2	3.4	2.6	3.8	0.8
sp|Q15149|PLEC_HUMAN;tr|E9PMV1|E9PMV1_HUMAN;tr|E9PKG0|E9PKG0_HUMAN;tr|H0YDN1|H0YDN1_HUMAN;tr|E9PIA2|E9PIA2_HUMAN;tr|E9PQ28|E9PQ28_HUMAN	sp|Q15149|PLEC_HUMAN	0.548951	0.414402	0.325364	250150000	121300000	137480000	137320000	50267000	44731000	84;16;5;3;2;2	84;16;5;3;2;2	83;16;5;3;2;2	sp|Q15149|PLEC_HUMAN Plectin OS=Homo sapiens GN=PLEC PE=1 SV=3	6	84	84	83	65	22	30	36	15	16	65	22	30	36	15	16	64	22	30	36	15	16	20.5	20.5	20.1	531.78	4684	4684;703;190;200;174;497	0	323.31	15.5	5.6	7.7	9.1	4.7
sp|Q9BQA1|MEP50_HUMAN;tr|H0Y711|H0Y711_HUMAN	sp|Q9BQA1|MEP50_HUMAN	0.906806	0.52134	0.307316	247120000	164620000	273240000	224090000	85823000	83971000	7;3	7;3	7;3	sp|Q9BQA1|MEP50_HUMAN Methylosome protein 50 OS=Homo sapiens GN=WDR77 PE=1 SV=1	2	7	7	7	6	5	2	3	4	4	6	5	2	3	4	4	6	5	2	3	4	4	21.9	21.9	21.9	36.724	342	342;291	0	60.929	21.3	19.9	8.5	15.2	17.3
sp|O75688|PPM1B_HUMAN;tr|C9JIR6|C9JIR6_HUMAN;tr|B8ZZF0|B8ZZF0_HUMAN;sp|P35813|PPM1A_HUMAN;tr|E9PKB5|E9PKB5_HUMAN	sp|O75688|PPM1B_HUMAN;tr|C9JIR6|C9JIR6_HUMAN;tr|B8ZZF0|B8ZZF0_HUMAN	4.11015e-08	0.432284	0.306441	24330000	6922300	8401300	1	2992400	2574500	10;9;8;2;1	10;9;8;2;1	10;9;8;2;1	sp|O75688|PPM1B_HUMAN Protein phosphatase 1B OS=Homo sapiens GN=PPM1B PE=1 SV=1;tr|C9JIR6|C9JIR6_HUMAN Protein phosphatase 1B (Fragment) OS=Homo sapiens GN=PPM1B PE=1 SV=1;tr|B8ZZF0|B8ZZF0_HUMAN Protein phosphatase 1B (Fragment) OS=Homo sapiens GN=PPM1B PE	5	10	10	10	9	2	3	1	3	2	9	2	3	1	3	2	9	2	3	1	3	2	23.8	23.8	23.8	52.642	479	479;653;303;382;187	0	65.867	21.9	4.8	7.5	2.7	9
sp|P84090|ERH_HUMAN;tr|G3V279|G3V279_HUMAN	sp|P84090|ERH_HUMAN;tr|G3V279|G3V279_HUMAN	0.662171	0.275595	0.270132	2128000000	1711500000	1530400000	1409100000	471680000	413410000	8;4	8;4	8;4	sp|P84090|ERH_HUMAN Enhancer of rudimentary homolog OS=Homo sapiens GN=ERH PE=1 SV=1;tr|G3V279|G3V279_HUMAN Enhancer of rudimentary homolog OS=Homo sapiens GN=ERH PE=1 SV=1	2	8	8	8	6	8	5	6	5	4	6	8	5	6	5	4	6	8	5	6	5	4	57.7	57.7	57.7	12.259	104	104;71	0	188.32	56.7	57.7	36.5	56.7	32.7
sp|Q8NHX4|SPTA3_HUMAN;tr|A0A087WWT4|A0A087WWT4_HUMAN;tr|F8WBR8|F8WBR8_HUMAN;tr|A4QPE4|A4QPE4_HUMAN;tr|E9PQ05|E9PQ05_HUMAN	sp|Q8NHX4|SPTA3_HUMAN;tr|A0A087WWT4|A0A087WWT4_HUMAN	0.641087	0.270108	0.266196	315480000	85440000	80839000	202250000	23078000	21519000	76;74;24;7;1	68;66;17;0;0	68;66;17;0;0	sp|Q8NHX4|SPTA3_HUMAN Spermatogenesis-associated protein 3 OS=Homo sapiens GN=SPATA3 PE=2 SV=2;tr|A0A087WWT4|A0A087WWT4_HUMAN Tetraspanin OS=Homo sapiens GN=TSPAN10 PE=1 SV=1	5	76	68	68	65	23	18	51	14	10	57	21	17	47	14	9	57	21	17	47	14	9	19.3	17.3	17.3	556.97	4866	4866;2858;869;934;459	0	323.31	17.2	6.7	5.2	12.9	4.2
CON__P00761;tr|A6XGL3|A6XGL3_HUMAN;tr|A0A087WWD8|A0A087WWD8_HUMAN;tr|E9PRA0|E9PRA0_HUMAN;tr|J3KQC6|J3KQC6_HUMAN;sp|Q9BYE2|TMPSD_HUMAN	CON__P00761	0.896573	0.287619	0.199351	21155000000	32365000000	75821000000	18967000000	9308800000	15115000000	8;1;1;1;1;1	8;1;1;1;1;1	7;0;0;0;0;0		6	8	8	7	6	5	6	6	5	5	6	5	6	6	5	5	6	5	5	6	5	5	30.3	30.3	26.8	24.409	231	231;365;562;567;586;586	0	323.31	26.8	25.1	28.6	25.1	25.1
sp|Q5QGS0|K2022_HUMAN;CON__P04264;CON__P35908;CON__P35908v2;CON__P13647;CON__Q5XQN5;CON__P48668;CON__P02538;CON__P04259;CON__Q922U2;tr|F8W1Z5|F8W1Z5_HUMAN;CON__P50446;CON__Q3TTY5;CON__P12035;tr|F8VRE4|F8VRE4_HUMAN;CON__Q8BGZ7;tr|H0YCA0|H0YCA0_HUMAN;CON__Q01546;CON__H-INV:HIT000292931;CON__O95678;tr|F8W1F1|F8W1F1_HUMAN;CON__Q5XKE5;CON__Q8VED5;tr|H0YIE9|H0YIE9_HUMAN;CON__P08729;CON__Q9DCV7;CON__Q3K…	sp|Q5QGS0|K2022_HUMAN	1.38709	0.117687	0.113745	1475100000	3784100000	4428600000	2046100000	445340000	503730000	101;38;30;30;23;20;19;19;18;16;12;11;9;9;8;8;8;7;7;7;7;7;6;6;5;5;5;5;4;4;4;4;4;4;4;4;4;3;3;3;3;2;2;2;2;2;2;2;2;2;1;1;1;1;1;1	101;38;30;30;23;20;19;19;18;16;12;11;9;9;8;8;8;7;7;7;7;7;6;6;5;5;5;5;4;4;4;4;4;4;4;4;4;3;3;3;3;2;2;2;2;2;2;2;2;2;1;1;1;1;1;1	77;30;23;23;17;14;11;11;10;10;7;5;3;3;0;2;7;1;0;2;0;3;1;5;0;0;0;0;0;3;0;0;0;0;4;3;0;0;0;0;0;0;1;0;0;0;0;0;0;0;0;0;1;1;0;0	sp|Q5QGS0|K2022_HUMAN Protein KIAA2022 OS=Homo sapiens GN=KIAA2022 PE=2 SV=1	56	101	101	77	59	77	54	69	42	37	59	77	54	69	42	37	46	62	44	51	28	27	12.7	12.7	7.7	1491.9	14202	14202;644;645;639;590;601;564;564;564;580;439;553;707;629;482;551;662;638;443;551;408;535;531;1111;469;457;469;572;600;521;578;222;525;600;333;521;499;99;539;524;369;520;335;746;540;523;1649;594;529;511;623;213;426;396;357;345	0	323.31	8.1	10.2	7.9	8.7	5.9
CON__P02769;tr|H0YA55|H0YA55_HUMAN;tr|D6RHD5|D6RHD5_HUMAN	CON__P02769	0.436857	0.107387	0.106254	16225000000	9092800000	10857000000	7088000000	976450000	1153600000	28;4;3	28;4;3	24;0;0		3	28	28	24	23	21	16	21	14	11	23	21	16	21	14	11	19	18	13	17	10	9	39.9	39.9	35.1	69.293	607	607;454;459	0	323.31	34.6	32.8	21.7	30.6	20.1
sp|Q8N8K9|K1958_HUMAN;CON__P13645;CON__P35527;CON__P02533;CON__P08779;tr|A8MVH1|A8MVH1_HUMAN;CON__P02535-1;CON__Q04695;CON__Q6IFX2;CON__Q9QWL7;tr|A0A087X236|A0A087X236_HUMAN;CON__A2A4G1;tr|A0A0G2JKI4|A0A0G2JKI4_HUMAN;CON__P08730-1;CON__P19012;CON__P08727;CON__Q9Z2K1;tr|H3BUK1|H3BUK1_HUMAN;CON__ENSEMBL:ENSP00000377550;tr|C9JMM4|C9JMM4_HUMAN;CON__Q3ZAW8;CON__P19001;CON__P13646-1;tr|H3BNJ8|H3BNJ8_HU…	sp|Q8N8K9|K1958_HUMAN	1.39513	0.105422	0.0949971	718000000	2010200000	2234700000	1001700000	211920000	212290000	80;28;26;19;15;11;10;9;9;9;7;7;7;7;7;7;6;6;6;6;6;6;5;5;4;4;4;3;3;3;3;2;2;2;2;2;2;2;1;1;1;1;1;1;1;1;1;1;1;1;1;1;1;1;1;1;1	80;28;26;19;15;11;10;9;9;9;7;7;7;7;7;7;6;6;6;6;6;6;5;5;4;4;4;3;3;3;3;2;2;2;2;2;2;2;1;1;1;1;1;1;1;1;1;1;1;1;1;1;1;1;1;1;1	79;27;26;18;14;11;9;8;8;8;6;6;6;6;6;6;5;5;5;5;5;5;5;4;3;3;3;3;2;3;3;2;1;2;1;2;2;2;0;1;1;1;0;0;0;0;1;0;0;0;0;1;0;0;0;0;0	sp|Q8N8K9|K1958_HUMAN Uncharacterized protein KIAA1958 OS=Homo sapiens GN=KIAA1958 PE=1 SV=1	57	80	80	79	46	60	55	52	37	35	46	60	55	52	37	35	45	59	55	52	36	34	11.2	11.2	10.5	1292.5	12228	12228;593;623;472;473;551;570;432;452;433;613;456;440;437;456;400;469;562;420;392;474;403;458;413;373;486;423;93;464;389;515;459;525;450;1268;431;494;424;631;764;295;299;425;416;534;455;198;476;416;448;471;468;467;453;456;404;416	0	323.31	7.1	9	7.3	7.3	6.5
CON__ENSEMBL:ENSBTAP00000038253	CON__ENSEMBL:ENSBTAP00000038253	1	1	6.49604e-07	1	1	1539400	1	1	1	11	1	1		1	11	1	1	7	9	8	5	7	4	0	0	1	0	0	0	0	0	1	0	0	0	14.4	1.8	1.8	63.165	606	606	1	-2	7.6	10.7	11.1	5.3	10.7
sp|Q08554|DSC1_HUMAN	sp|Q08554|DSC1_HUMAN	1	1	3.57667e-07	1	1	2795900	1	1	1	1	1	1	sp|Q08554|DSC1_HUMAN Desmocollin-1 OS=Homo sapiens GN=DSC1 PE=1 SV=2	1	1	1	1	0	1	1	0	0	0	0	1	1	0	0	0	0	1	1	0	0	0	1.7	1.7	1.7	99.986	894	894	0.001506	6.9801	0	1.7	1.7	0	0
tr|H3BLU7|H3BLU7_HUMAN;sp|O43488|ARK72_HUMAN;sp|Q8NHP1|ARK74_HUMAN	tr|H3BLU7|H3BLU7_HUMAN;sp|O43488|ARK72_HUMAN	0.577203	0.557257	1.6682e-07	11168000	5741700	5994500	6446200	3199600	1	4;4;1	4;4;1	4;4;1	tr|H3BLU7|H3BLU7_HUMAN Aflatoxin B1 aldehyde reductase member 2 (Fragment) OS=Homo sapiens GN=AKR7A2 PE=1 SV=1;sp|O43488|ARK72_HUMAN Aflatoxin B1 aldehyde reductase member 2 OS=Homo sapiens GN=AKR7A2 PE=1 SV=3	3	4	4	4	4	2	1	2	2	1	4	2	1	2	2	1	4	2	1	2	2	1	18.5	18.5	18.5	34.684	314	314;359;331	0	39.513	18.5	10.8	6.1	10.8	10.8
CON__P12763	CON__P12763	1.66413	2548200	1.52138e-07	9061200	1	6573000	15079000	2548200	1	3	3	3		1	3	3	3	3	1	2	2	2	1	3	1	2	2	2	1	3	1	2	2	2	1	9.5	9.5	9.5	38.418	359	359	0	22.757	9.5	4.2	7.2	7.2	7.2
tr|K7EMV3|K7EMV3_HUMAN;tr|B4DEB1|B4DEB1_HUMAN;tr|K7EK07|K7EK07_HUMAN;sp|Q71DI3|H32_HUMAN;sp|Q16695|H31T_HUMAN;sp|P84243|H33_HUMAN;sp|P68431|H31_HUMAN;tr|K7ES00|K7ES00_HUMAN;tr|K7EP01|K7EP01_HUMAN;sp|Q6NXT2|H3C_HUMAN	tr|K7EMV3|K7EMV3_HUMAN;tr|B4DEB1|B4DEB1_HUMAN;tr|K7EK07|K7EK07_HUMAN;sp|Q71DI3|H32_HUMAN;sp|Q16695|H31T_HUMAN;sp|P84243|H33_HUMAN;sp|P68431|H31_HUMAN;tr|K7ES00|K7ES00_HUMAN;tr|K7EP01|K7EP01_HUMAN;sp|Q6NXT2|H3C_HUMAN	24933000	1	1.44388e-07	1	1	6925800	24933000	1	1	4;4;4;4;4;4;4;4;2;2	4;4;4;4;4;4;4;4;2;2	2;2;2;2;2;2;2;2;0;0	tr|K7EMV3|K7EMV3_HUMAN Histone H3 OS=Homo sapiens GN=H3F3B PE=1 SV=1;tr|B4DEB1|B4DEB1_HUMAN Histone H3 OS=Homo sapiens GN=H3F3A PE=1 SV=1;tr|K7EK07|K7EK07_HUMAN Histone H3 (Fragment) OS=Homo sapiens GN=H3F3B PE=1 SV=1;sp|Q71DI3|H32_HUMAN Histone H3.2 OS=Ho	10	4	4	2	1	1	2	2	3	1	1	1	2	2	3	1	0	0	0	0	2	1	29.3	29.3	12	10.334	92	92;123;132;136;136;136;136;151;113;135	0	25.348	9.8	9.8	17.4	17.4	21.7
tr|J3KPF5|J3KPF5_HUMAN;tr|G3V132|G3V132_HUMAN;sp|P47756|CAPZB_HUMAN;tr|B1AK85|B1AK85_HUMAN	tr|J3KPF5|J3KPF5_HUMAN;tr|G3V132|G3V132_HUMAN;sp|P47756|CAPZB_HUMAN;tr|B1AK85|B1AK85_HUMAN	0.909161	1.17448e-07	1.01095e-07	16887000	8514400	9891700	15353000	1	1	8;8;6;4	8;8;6;4	8;8;6;4	tr|J3KPF5|J3KPF5_HUMAN Prostamide/prostaglandin F synthase OS=Homo sapiens GN=FAM213B PE=1 SV=1;tr|G3V132|G3V132_HUMAN Interactor protein for cytohesin exchange factors 1 OS=Homo sapiens GN=IPCEF1 PE=4 SV=1;sp|P47756|CAPZB_HUMAN F-actin-capping protein sub	4	8	8	8	4	2	2	6	2	0	4	2	2	6	2	0	4	2	2	6	2	0	10.4	10.4	10.4	75.426	739	739;824;277;260	0	60.394	4.5	3.2	3.2	7.7	4.6
sp|Q02413|DSG1_HUMAN	sp|Q02413|DSG1_HUMAN	1	1	9.90393e-08	1	1	10097000	1	1	1	2	2	2	sp|Q02413|DSG1_HUMAN Desmoglein-1 OS=Homo sapiens GN=DSG1 PE=1 SV=2	1	2	2	2	1	1	2	1	0	0	1	1	2	1	0	0	1	1	2	1	0	0	3.3	3.3	3.3	113.75	1049	1049	0	17.884	1.8	1.8	3.3	1.8	0
tr|N0DVX5|N0DVX5_HUMAN;sp|Q9HCK1|ZDBF2_HUMAN	tr|N0DVX5|N0DVX5_HUMAN;sp|Q9HCK1|ZDBF2_HUMAN	0.302376	1.16228e-07	9.81547e-08	39140000	8603800	10188000	11835000	1	1	13;13	13;13	13;13	tr|N0DVX5|N0DVX5_HUMAN DBF4-type zinc finger-containing protein 2 OS=Homo sapiens GN=ZDBF2 PE=1 SV=1;sp|Q9HCK1|ZDBF2_HUMAN DBF4-type zinc finger-containing protein 2 OS=Homo sapiens GN=ZDBF2 PE=1 SV=3	2	13	13	13	12	2	2	4	1	3	12	2	2	4	1	3	12	2	2	4	1	3	7.6	7.6	7.6	265.05	2352	2352;2354	0	114.56	6.5	1.4	1.4	2.5	0.6
sp|Q9UH99|SUN2_HUMAN;tr|B0QY60|B0QY60_HUMAN;tr|B0QY68|B0QY68_HUMAN;tr|B0QY66|B0QY66_HUMAN;tr|B0QY64|B0QY64_HUMAN;tr|B0QY67|B0QY67_HUMAN	sp|Q9UH99|SUN2_HUMAN	1.16075	1.02372	6.69927e-08	17673000	14588000	14927000	20514000	14934000	1	9;2;1;1;1;1	9;2;1;1;1;1	9;2;1;1;1;1	sp|Q9UH99|SUN2_HUMAN SUN domain-containing protein 2 OS=Homo sapiens GN=SUN2 PE=1 SV=3	6	9	9	9	6	4	2	5	2	1	6	4	2	5	2	1	6	4	2	5	2	1	16.3	16.3	16.3	80.31	717	717;198;101;110;228;359	0	72.947	10.5	8.1	3.1	9.5	4.5
sp|P42356|PI4KA_HUMAN;tr|J3KN10|J3KN10_HUMAN;sp|A4QPH2|PI4P2_HUMAN;sp|Q8N8J0|PI4P1_HUMAN;tr|A8MTF1|A8MTF1_HUMAN	sp|P42356|PI4KA_HUMAN;tr|J3KN10|J3KN10_HUMAN	0.429249	7.65169e-08	6.29168e-08	19348000	13069000	15894000	8305100	1	1	16;16;2;1;1	16;16;2;1;1	16;16;2;1;1	sp|P42356|PI4KA_HUMAN Phosphatidylinositol 4-kinase alpha OS=Homo sapiens GN=PI4KA PE=1 SV=3;tr|J3KN10|J3KN10_HUMAN Phosphatidylinositol 4-kinase alpha OS=Homo sapiens GN=PI4KA PE=1 SV=1	5	16	16	16	12	4	4	5	1	1	12	4	4	5	1	1	12	4	4	5	1	1	10	10	10	231.32	2044	2044;2102;592;262;435	0	101.86	7.7	2.5	2.3	2.8	0.6
sp|P81605|DCD_HUMAN	sp|P81605|DCD_HUMAN	12267000	1e-07	4.26203e-08	1	10000000	23463000	12267000	1	1	3	3	3	sp|P81605|DCD_HUMAN Dermcidin OS=Homo sapiens GN=DCD PE=1 SV=2	1	3	3	3	1	2	2	3	0	0	1	2	2	3	0	0	1	2	2	3	0	0	22.7	22.7	22.7	11.284	110	110	0	19.955	10	12.7	12.7	22.7	0
tr|A0A024R5I4|A0A024R5I4_HUMAN;sp|P98175|RBM10_HUMAN	tr|A0A024R5I4|A0A024R5I4_HUMAN;sp|P98175|RBM10_HUMAN	0.00133586	0.00375288	3.27514e-09	2468900000	1102700000	305330000	3298100	4138300	1	57;53	57;53	53;49	tr|A0A024R5I4|A0A024R5I4_HUMAN Solute carrier organic anion transporter family member OS=Homo sapiens GN=SLCO2B1 PE=1 SV=1;sp|P98175|RBM10_HUMAN RNA-binding protein 10 OS=Homo sapiens GN=RBM10 PE=1 SV=3	2	57	57	53	54	38	22	2	3	1	54	38	22	2	3	1	51	36	22	2	3	1	25.6	25.6	24.2	247.6	2294	2294;930	0	323.31	24.7	19.2	12.6	1.1	2.5
[truncated: 27 more columns]
