# Supplementary material for: Nascent alt-protein chemoproteomics reveals a repressor of ribosome biogenesis
Source: Research Square preprint supplement (doi:10.21203/rs.3.rs-871945/v1), 2021-09-09
Supplement: Supplementary file 6 [file e310644dcc0c99bba9b27a22.xlsx]

## Sheet: Key
Abbreviations used for protein and peptide identification summary tables
Peptide Identifications
Database Accession	UniProt + MINAS-60 protein; contaminants
Peptide m/z	Observed mass over charge
Peptide Mass	Observed relative molecular mass
Peptide Score	Peptide match score
Sequence	Sequence of the peptide in 1-letter code
Modifications	Any variable modifications found in the peptide
Protein Identifications
LFQ intensity	Label-free quantification intensity
Protein IDs	The name of protein identified
Worksheets
S1	Key
S2	Interacted partner protein level evidence

## Sheet: Interacted partner of BRIX1
Protein IDs	Majority protein IDs	KD/Ctrl-1	KD/Ctrl-2	KD/Ctrl-3	KD/Ctrl-4	KD/Ctrl-5	LFQ intensity Ctrl_BRIX1-1	LFQ intensity Ctrl_BRIX1-2	LFQ intensity Ctrl_BRIX1-3	LFQ intensity Ctrl_BRIX1-4	LFQ intensity Ctrl_BRIX1-5	LFQ intensity KD_BRIX1-1	LFQ intensity KD_BRIX1-2	LFQ intensity KD_BRIX1-3	LFQ intensity KD_BRIX1-4	LFQ intensity KD_BRIX1-5	Peptide counts (all)	Peptide counts (razor+unique)	Peptide counts (unique)	Fasta headers	Number of proteins	Peptides	Razor + unique peptides	Unique peptides	Peptides C_Bri_S-1	Peptides C_Bri_S-2	Peptides C_Bri_S-3	Peptides Ctrl_Brix1-1	Peptides Ctrl_Brix1-2	Peptides K_Bri_S-1	Peptides K_Bri_S-2	Peptides K_Bri_S-3	Peptides KD_Brix1-1	Peptides KD_Brix1-2	Razor + unique peptides C_Bri_S-1	Razor + unique peptides C_Bri_S-2	Razor + unique peptides C_Bri_S-3	Razor + unique peptides Ctrl_Brix1-1	Razor + unique peptides Ctrl_Brix1-2	Razor + unique peptides K_Bri_S-1	Razor + unique peptides K_Bri_S-2	Razor + unique peptides K_Bri_S-3	Razor + unique peptides KD_Brix1-1	Razor + unique peptides KD_Brix1-2	Unique peptides C_Bri_S-1	Unique peptides C_Bri_S-2	Unique peptides C_Bri_S-3	Unique peptides Ctrl_Brix1-1	Unique peptides Ctrl_Brix1-2
sp|Q6RFH5|WDR74_HUMAN;tr|E9PS41|E9PS41_HUMAN;tr|H0YFP2|H0YFP2_HUMAN;tr|F5GYL6|F5GYL6_HUMAN;tr|F5H0Q8|F5H0Q8_HUMAN	sp|Q6RFH5|WDR74_HUMAN;tr|E9PS41|E9PS41_HUMAN	1.18897	3921600	4335000	1.17948	1.95192	3407400	1	1	4602700	4738100	4051300	3921600	4335000	5428800	9248400	8;6;2;2;1	8;6;2;2;1	8;6;2;2;1	sp|Q6RFH5|WDR74_HUMAN WD repeat-containing protein 74 OS=Homo sapiens GN=WDR74 PE=1 SV=1;tr|E9PS41|E9PS41_HUMAN WD repeat-containing protein 74 OS=Homo sapiens GN=WDR74 PE=1 SV=1	5	8	8	8	2	1	1	2	3	5	2	4	3	7	2	1	1	2	3	5	2	4	3	7	2	1	1	2	3
sp|Q99880|H2B1L_HUMAN;sp|Q99879|H2B1M_HUMAN;sp|Q99877|H2B1N_HUMAN;sp|Q93079|H2B1H_HUMAN;sp|Q5QNW6|H2B2F_HUMAN;sp|P62807|H2B1C_HUMAN;sp|P58876|H2B1D_HUMAN;sp|O60814|H2B1K_HUMAN;tr|U3KQK0|U3KQK0_HUMAN;sp|P57053|H2BFS_HUMAN;sp|Q96A08|H2B1A_HUMAN	sp|Q99880|H2B1L_HUMAN;sp|Q99879|H2B1M_HUMAN;sp|Q99877|H2B1N_HUMAN;sp|Q93079|H2B1H_HUMAN;sp|Q5QNW6|H2B2F_HUMAN;sp|P62807|H2B1C_HUMAN;sp|P58876|H2B1D_HUMAN;sp|O60814|H2B1K_HUMAN;tr|U3KQK0|U3KQK0_HUMAN;sp|P57053|H2BFS_HUMAN	24482000	18216000	6.28299e-08	29440000	0.821099	1	1	15916000	1	23499000	24482000	18216000	1	29440000	19295000	6;6;6;6;6;6;6;6;6;5;2	2;2;2;2;2;2;2;2;2;2;0	2;2;2;2;2;2;2;2;2;2;0	sp|Q99880|H2B1L_HUMAN Histone H2B type 1-L OS=Homo sapiens GN=HIST1H2BL PE=1 SV=3;sp|Q99879|H2B1M_HUMAN Histone H2B type 1-M OS=Homo sapiens GN=HIST1H2BM PE=1 SV=3;sp|Q99877|H2B1N_HUMAN Histone H2B type 1-N OS=Homo sapiens GN=HIST1H2BN PE=1 SV=3;sp|Q93079|	11	6	2	2	3	4	5	4	4	6	5	3	5	5	1	0	2	1	1	2	2	0	2	2	1	0	2	1	1
sp|P62318|SMD3_HUMAN;tr|H3BT13|H3BT13_HUMAN	sp|P62318|SMD3_HUMAN	14028000	0.858872	1.0152	1.09615	7.85238e-08	1	19911000	18621000	9753200	12735000	14028000	17101000	18904000	10691000	1	3;1	3;1	3;1	sp|P62318|SMD3_HUMAN Small nuclear ribonucleoprotein Sm D3 OS=Homo sapiens GN=SNRPD3 PE=1 SV=1	2	3	3	3	1	3	3	2	2	2	3	3	2	1	1	3	3	2	2	2	3	3	2	1	1	3	3	2	2
sp|O75607|NPM3_HUMAN	sp|O75607|NPM3_HUMAN	8094400	0.860106	1	1	1	1	8128300	1	1	1	8094400	6991200	1	1	1	2	2	2	sp|O75607|NPM3_HUMAN Nucleoplasmin-3 OS=Homo sapiens GN=NPM3 PE=1 SV=3	1	2	2	2	1	2	0	1	1	2	2	1	1	1	1	2	0	1	1	2	2	1	1	1	1	2	0	1	1
tr|H0YHH4|H0YHH4_HUMAN	tr|H0YHH4|H0YHH4_HUMAN	7123900	1	1	1	1	1	1	1	1	1	7123900	1	1	1	1	1	1	1	tr|H0YHH4|H0YHH4_HUMAN KAT8 regulatory NSL complex subunit 2 (Fragment) OS=Homo sapiens GN=KANSL2 PE=4 SV=1	1	1	1	1	0	0	0	0	0	1	0	0	0	0	0	0	0	0	0	1	0	0	0	0	0	0	0	0	0
sp|Q9NQT4|EXOS5_HUMAN;tr|M0R050|M0R050_HUMAN;tr|M0R102|M0R102_HUMAN	sp|Q9NQT4|EXOS5_HUMAN;tr|M0R050|M0R050_HUMAN	5044600	1	1	1	1	1	1	1	1	1	5044600	1	1	1	1	5;3;1	5;3;1	5;3;1	sp|Q9NQT4|EXOS5_HUMAN Exosome complex component RRP46 OS=Homo sapiens GN=EXOSC5 PE=1 SV=1;tr|M0R050|M0R050_HUMAN Exosome complex component RRP46 OS=Homo sapiens GN=EXOSC5 PE=1 SV=1	3	5	5	5	2	1	1	1	0	2	1	2	1	0	2	1	1	1	0	2	1	2	1	0	2	1	1	1	0
sp|Q96N76|HUTU_HUMAN	sp|Q96N76|HUTU_HUMAN	4353100	1	1	1	1	1	1	1	1	1	4353100	1	1	1	1	1	1	1	sp|Q96N76|HUTU_HUMAN Urocanate hydratase OS=Homo sapiens GN=UROC1 PE=1 SV=1	1	1	1	1	0	0	0	0	0	1	0	0	0	0	0	0	0	0	0	1	0	0	0	0	0	0	0	0	0
sp|P07197|NFM_HUMAN;tr|E7ESP9|E7ESP9_HUMAN;tr|E7EMV2|E7EMV2_HUMAN	sp|P07197|NFM_HUMAN;tr|E7ESP9|E7ESP9_HUMAN;tr|E7EMV2|E7EMV2_HUMAN	3741900	1.03132	0.879397	1	3323800	1	4485800	3689800	1	1	3741900	4626300	3244800	1	3323800	10;10;9	9;9;8	8;8;7	sp|P07197|NFM_HUMAN Neurofilament medium polypeptide OS=Homo sapiens GN=NEFM PE=1 SV=3;tr|E7ESP9|E7ESP9_HUMAN Neurofilament medium polypeptide OS=Homo sapiens GN=NEFM PE=1 SV=1;tr|E7EMV2|E7EMV2_HUMAN Neurofilament medium polypeptide OS=Homo sapiens GN=NEFM	3	10	9	8	2	5	4	2	1	3	6	4	2	5	1	4	3	1	0	3	5	4	1	4	1	3	3	1	0
tr|H0Y2W2|H0Y2W2_HUMAN;tr|Q5SV16|Q5SV16_HUMAN	tr|H0Y2W2|H0Y2W2_HUMAN	3660400	1	1	1	1	1	1	1	1	1	3660400	1	1	1	1	19;7	2;0	0;0	tr|H0Y2W2|H0Y2W2_HUMAN ATPase family AAA domain-containing protein 3A (Fragment) OS=Homo sapiens GN=ATAD3A PE=1 SV=1	2	19	2	0	8	5	11	6	7	10	8	8	4	7	0	1	2	1	1	1	1	1	0	0	0	0	0	0	0
tr|Q5JRI1|Q5JRI1_HUMAN;sp|O75494|SRS10_HUMAN;tr|Q6IQ42|Q6IQ42_HUMAN	tr|Q5JRI1|Q5JRI1_HUMAN;sp|O75494|SRS10_HUMAN	3643600	9076700	1.06071	1	1.52133	1	1	8084100	1	5819900	3643600	9076700	8574900	1	8854000	6;6;1	6;6;1	3;3;1	tr|Q5JRI1|Q5JRI1_HUMAN Serine/arginine-rich-splicing factor 10 OS=Homo sapiens GN=SRSF10 PE=1 SV=1;sp|O75494|SRS10_HUMAN Serine/arginine-rich splicing factor 10 OS=Homo sapiens GN=SRSF10 PE=1 SV=1	3	6	6	3	1	1	2	0	4	4	4	4	0	3	1	1	2	0	4	4	4	4	0	3	0	1	1	0	2
sp|Q71UI9|H2AV_HUMAN;sp|P0C0S5|H2AZ_HUMAN;tr|C9J0D1|C9J0D1_HUMAN;tr|C9J386|C9J386_HUMAN	sp|Q71UI9|H2AV_HUMAN;sp|P0C0S5|H2AZ_HUMAN;tr|C9J0D1|C9J0D1_HUMAN;tr|C9J386|C9J386_HUMAN	1.80944	0.946317	9467700	1.00115	8147400	9427800	11866000	1	7491000	1	17059000	11229000	9467700	7499600	8147400	4;4;3;2	3;3;2;2	3;3;2;2	sp|Q71UI9|H2AV_HUMAN Histone H2A.V OS=Homo sapiens GN=H2AFV PE=1 SV=3;sp|P0C0S5|H2AZ_HUMAN Histone H2A.Z OS=Homo sapiens GN=H2AFZ PE=1 SV=2;tr|C9J0D1|C9J0D1_HUMAN Histone H2A OS=Homo sapiens GN=H2AFV PE=3 SV=1;tr|C9J386|C9J386_HUMAN Histone H2A OS=Homo sap	4	4	3	3	3	3	2	3	3	3	3	3	2	4	2	2	1	2	2	2	2	2	2	3	2	2	1	2	2
sp|Q53HL2|BOREA_HUMAN	sp|Q53HL2|BOREA_HUMAN	2521500	4.69043e-07	2105900	1	1.07302	1	2132000	1	1	2106300	2521500	1	2105900	1	2260100	8	8	8	sp|Q53HL2|BOREA_HUMAN Borealin OS=Homo sapiens GN=CDCA8 PE=1 SV=2	1	8	8	8	0	3	1	1	4	7	1	2	1	5	0	3	1	1	4	7	1	2	1	5	0	3	1	1	4
sp|Q9Y3A2|UTP11_HUMAN	sp|Q9Y3A2|UTP11_HUMAN	2447200	1	5.01253e-07	1	2490300	1	1	1995000	1	1	2447200	1	1	1	2490300	6	6	6	sp|Q9Y3A2|UTP11_HUMAN Probable U3 small nucleolar RNA-associated protein 11 OS=Homo sapiens GN=UTP11L PE=1 SV=2	1	6	6	6	2	2	4	0	1	4	1	0	0	2	2	2	4	0	1	4	1	0	0	2	2	2	4	0	1
sp|P13639|EF2_HUMAN	sp|P13639|EF2_HUMAN	2438100	1	1	1	1	1	1	1	1	1	2438100	1	1	1	1	7	6	6	sp|P13639|EF2_HUMAN Elongation factor 2 OS=Homo sapiens GN=EEF2 PE=1 SV=4	1	7	6	6	0	1	0	0	0	3	1	2	0	1	0	1	0	0	0	3	1	2	0	0	0	1	0	0	0
sp|Q9NV06|DCA13_HUMAN;tr|A0A087WT20|A0A087WT20_HUMAN;tr|B3KME9|B3KME9_HUMAN;tr|E5RHM4|E5RHM4_HUMAN;tr|A0A087X1F8|A0A087X1F8_HUMAN	sp|Q9NV06|DCA13_HUMAN;tr|A0A087WT20|A0A087WT20_HUMAN;tr|B3KME9|B3KME9_HUMAN	2326900	8.03729e-07	1910200	1	1.68133	1	1244200	1	1	2384000	2326900	1	1910200	1	4008300	8;8;5;3;3	8;8;5;3;3	8;8;5;3;3	sp|Q9NV06|DCA13_HUMAN DDB1- and CUL4-associated factor 13 OS=Homo sapiens GN=DCAF13 PE=1 SV=2;tr|A0A087WT20|A0A087WT20_HUMAN DDB1- and CUL4-associated factor 13 OS=Homo sapiens GN=DCAF13 PE=1 SV=1;tr|B3KME9|B3KME9_HUMAN DDB1- and CUL4-associated factor 13	5	8	8	8	1	2	1	0	3	3	1	3	1	7	1	2	1	0	3	3	1	3	1	7	1	2	1	0	3
tr|B9A008|B9A008_HUMAN;tr|H0Y714|H0Y714_HUMAN;sp|Q96G21|IMP4_HUMAN;tr|E7ENR5|E7ENR5_HUMAN;tr|B8ZZ47|B8ZZ47_HUMAN	tr|B9A008|B9A008_HUMAN;tr|H0Y714|H0Y714_HUMAN;sp|Q96G21|IMP4_HUMAN;tr|E7ENR5|E7ENR5_HUMAN;tr|B8ZZ47|B8ZZ47_HUMAN	2316300	1	1	1	1	1	1	1	1	1	2316300	1	1	1	1	4;4;4;4;3	4;4;4;4;3	4;4;4;4;3	tr|B9A008|B9A008_HUMAN U3 small nucleolar ribonucleoprotein protein IMP4 (Fragment) OS=Homo sapiens GN=IMP4 PE=1 SV=1;tr|H0Y714|H0Y714_HUMAN U3 small nucleolar ribonucleoprotein protein IMP4 (Fragment) OS=Homo sapiens GN=IMP4 PE=1 SV=1;sp|Q96G21|IMP4_HUMAN	5	4	4	4	2	2	2	0	1	2	1	1	0	2	2	2	2	0	1	2	1	1	0	2	2	2	2	0	1
sp|Q14980|NUMA1_HUMAN;tr|F5H6Y5|F5H6Y5_HUMAN;tr|F5H4J1|F5H4J1_HUMAN	sp|Q14980|NUMA1_HUMAN	2128600	1	1	1	1	1	1	1	1	1	2128600	1	1	1	1	8;2;2	8;2;2	0;0;0	sp|Q14980|NUMA1_HUMAN Nuclear mitotic apparatus protein 1 OS=Homo sapiens GN=NUMA1 PE=1 SV=2	3	8	8	0	0	2	1	0	0	6	2	0	0	0	0	2	1	0	0	6	2	0	0	0	0	0	0	0	0
sp|P07900|HS90A_HUMAN;tr|G3V2J8|G3V2J8_HUMAN;sp|Q14568|HS902_HUMAN;sp|Q58FF6|H90B4_HUMAN	sp|P07900|HS90A_HUMAN	2043000	1	2211600	1	1	1	1	1	1	1	2043000	1	2211600	1	1	10;4;3;2	5;2;2;0	5;2;2;0	sp|P07900|HS90A_HUMAN Heat shock protein HSP 90-alpha OS=Homo sapiens GN=HSP90AA1 PE=1 SV=5	4	10	5	5	3	2	3	1	3	5	2	7	1	1	0	0	1	0	0	3	1	4	0	0	0	0	1	0	0
tr|E9PF19|E9PF19_HUMAN;sp|Q9Y4P3|TBL2_HUMAN;tr|Q96E41|Q96E41_HUMAN;tr|A0A087WXC6|A0A087WXC6_HUMAN	tr|E9PF19|E9PF19_HUMAN;sp|Q9Y4P3|TBL2_HUMAN;tr|Q96E41|Q96E41_HUMAN	1811600	0.64518	6.69703e-07	1	5.83124e-07	1	2548900	1493200	1	1714900	1811600	1644500	1	1	1	6;6;5;1	6;6;5;1	6;6;5;1	tr|E9PF19|E9PF19_HUMAN Transducin beta-like protein 2 OS=Homo sapiens GN=TBL2 PE=1 SV=1;sp|Q9Y4P3|TBL2_HUMAN Transducin beta-like protein 2 OS=Homo sapiens GN=TBL2 PE=1 SV=1;tr|Q96E41|Q96E41_HUMAN TBL2 protein OS=Homo sapiens GN=TBL2 PE=1 SV=1	4	6	6	6	1	3	3	0	2	3	4	0	0	1	1	3	3	0	2	3	4	0	0	1	1	3	3	0	2
sp|P31689|DNJA1_HUMAN	sp|P31689|DNJA1_HUMAN	1786800	0.720164	3.07371e-07	1	1	1	3412000	3253400	1	1	1786800	2457200	1	1	1	6	6	6	sp|P31689|DNJA1_HUMAN DnaJ homolog subfamily A member 1 OS=Homo sapiens GN=DNAJA1 PE=1 SV=2	1	6	6	6	1	3	2	1	2	3	5	1	0	1	1	3	2	1	2	3	5	1	0	1	1	3	2	1	2
sp|Q6DKI1|RL7L_HUMAN;tr|R4GMU7|R4GMU7_HUMAN	sp|Q6DKI1|RL7L_HUMAN;tr|R4GMU7|R4GMU7_HUMAN	2.05087	0.859147	2.11342	0.724099	3.99512	12248000	16322000	10263000	14324000	10237000	25119000	14023000	21690000	10372000	40898000	11;9	11;9	11;9	sp|Q6DKI1|RL7L_HUMAN 60S ribosomal protein L7-like 1 OS=Homo sapiens GN=RPL7L1 PE=1 SV=1;tr|R4GMU7|R4GMU7_HUMAN 60S ribosomal protein L7-like 1 OS=Homo sapiens GN=RPL7L1 PE=1 SV=1	2	11	11	11	3	4	6	3	5	7	5	6	3	8	3	4	6	3	5	7	5	6	3	8	3	4	6	3	5
sp|Q2TAC6|KIF19_HUMAN	sp|Q2TAC6|KIF19_HUMAN	1705600	1	1	1	1	1	1	1	1	1	1705600	1	1	1	1	1	1	1	sp|Q2TAC6|KIF19_HUMAN Kinesin-like protein KIF19 OS=Homo sapiens GN=KIF19 PE=2 SV=2	1	1	1	1	0	0	0	1	0	1	0	0	0	0	0	0	0	1	0	1	0	0	0	0	0	0	0	1	0
sp|P12277|KCRB_HUMAN;tr|G3V4N7|G3V4N7_HUMAN;tr|G3V461|G3V461_HUMAN;tr|H0YJG0|H0YJG0_HUMAN	sp|P12277|KCRB_HUMAN;tr|G3V4N7|G3V4N7_HUMAN	1657100	1	1.48689	1	1	1	1	1198000	1	1	1657100	1	1781300	1	1	5;3;2;2	5;3;2;2	5;3;2;2	sp|P12277|KCRB_HUMAN Creatine kinase B-type OS=Homo sapiens GN=CKB PE=1 SV=1;tr|G3V4N7|G3V4N7_HUMAN Creatine kinase B-type (Fragment) OS=Homo sapiens GN=CKB PE=1 SV=1	4	5	5	5	1	1	2	0	1	3	1	3	0	0	1	1	2	0	1	3	1	3	0	0	1	1	2	0	1
sp|Q96GM8|TOE1_HUMAN	sp|Q96GM8|TOE1_HUMAN	1655000	1	1	1	1143300	1	1	1	1	1	1655000	1	1	1	1143300	3	3	3	sp|Q96GM8|TOE1_HUMAN Target of EGR1 protein 1 OS=Homo sapiens GN=TOE1 PE=1 SV=1	1	3	3	3	1	0	1	0	0	2	0	1	0	3	1	0	1	0	0	2	0	1	0	3	1	0	1	0	0
sp|Q8N3Z6|ZCHC7_HUMAN;tr|X6R4A7|X6R4A7_HUMAN	sp|Q8N3Z6|ZCHC7_HUMAN;tr|X6R4A7|X6R4A7_HUMAN	1648100	1.57761e-07	1	1	1	1	6338700	1	1	1	1648100	1	1	1	1	2;1	2;1	2;1	sp|Q8N3Z6|ZCHC7_HUMAN Zinc finger CCHC domain-containing protein 7 OS=Homo sapiens GN=ZCCHC7 PE=1 SV=2;tr|X6R4A7|X6R4A7_HUMAN Zinc finger CCHC domain-containing protein 7 OS=Homo sapiens GN=ZCCHC7 PE=1 SV=1	2	2	2	2	1	1	0	0	1	1	1	0	0	1	1	1	0	0	1	1	1	0	0	1	1	1	0	0	1
tr|E9PCY5|E9PCY5_HUMAN;sp|Q02880|TOP2B_HUMAN	tr|E9PCY5|E9PCY5_HUMAN;sp|Q02880|TOP2B_HUMAN	1540600	0.98845	1	1	1	1	1099600	1	1	1	1540600	1086900	1	1	1	10;10	5;5	5;5	tr|E9PCY5|E9PCY5_HUMAN DNA topoisomerase 2 (Fragment) OS=Homo sapiens GN=TOP2B PE=1 SV=1;sp|Q02880|TOP2B_HUMAN DNA topoisomerase 2-beta OS=Homo sapiens GN=TOP2B PE=1 SV=3	2	10	5	5	5	5	3	1	1	6	6	6	1	2	2	2	1	0	1	3	3	1	0	0	2	2	1	0	1
tr|F8VXI6|F8VXI6_HUMAN;tr|F8VUX1|F8VUX1_HUMAN;tr|F8VV59|F8VV59_HUMAN;sp|P55209|NP1L1_HUMAN;tr|H0YIV4|H0YIV4_HUMAN;tr|F5H4R6|F5H4R6_HUMAN;tr|F8W0J6|F8W0J6_HUMAN;tr|F8VY35|F8VY35_HUMAN;tr|B7Z9C2|B7Z9C2_HUMAN;tr|H0YHC3|H0YHC3_HUMAN;tr|F8W020|F8W020_HUMAN;tr|F8W118|F8W118_HUMAN;tr|H0YH88|H0YH88_HUMAN;tr|F8VRJ2|F8VRJ2_HUMAN;tr|F8W543|F8W543_HUMAN;sp|Q99733|NP1L4_HUMAN;tr|C9JZI7|C9JZI7_HUMAN;tr|E9PNW0|…	tr|F8VXI6|F8VXI6_HUMAN;tr|F8VUX1|F8VUX1_HUMAN;tr|F8VV59|F8VV59_HUMAN;sp|P55209|NP1L1_HUMAN;tr|H0YIV4|H0YIV4_HUMAN;tr|F5H4R6|F5H4R6_HUMAN;tr|F8W0J6|F8W0J6_HUMAN;tr|F8VY35|F8VY35_HUMAN;tr|B7Z9C2|B7Z9C2_HUMAN;tr|H0YHC3|H0YHC3_HUMAN;tr|F8W020|F8W020_HUMAN;tr|F8W118|F8W118_HUMAN;tr|H0YH88|H0YH88_HUMAN;tr|F8VRJ2|F8VRJ2_HUMAN;tr|F8W543|F8W543_HUMAN	1538200	1337300	1	1	1	1	1	1	1	1	1538200	1337300	1	1	1	3;3;3;3;3;3;3;3;3;3;3;3;2;2;2;1;1;1;1;1;1;1;1;1;1	3;3;3;3;3;3;3;3;3;3;3;3;2;2;2;1;1;1;1;1;1;1;1;1;1	3;3;3;3;3;3;3;3;3;3;3;3;2;2;2;1;1;1;1;1;1;1;1;1;1	tr|F8VXI6|F8VXI6_HUMAN Nucleosome assembly protein 1-like 1 (Fragment) OS=Homo sapiens GN=NAP1L1 PE=1 SV=1;tr|F8VUX1|F8VUX1_HUMAN Nucleosome assembly protein 1-like 1 (Fragment) OS=Homo sapiens GN=NAP1L1 PE=1 SV=1;tr|F8VV59|F8VV59_HUMAN Nucleosome assembly	25	3	3	3	1	2	1	0	1	2	3	1	0	1	1	2	1	0	1	2	3	1	0	1	1	2	1	0	1
sp|O60884|DNJA2_HUMAN;tr|A0A087WT48|A0A087WT48_HUMAN	sp|O60884|DNJA2_HUMAN	1524700	1358800	6.72043e-07	1	1	1	1	1488000	1	1	1524700	1358800	1	1	1	6;1	6;1	6;1	sp|O60884|DNJA2_HUMAN DnaJ homolog subfamily A member 2 OS=Homo sapiens GN=DNAJA2 PE=1 SV=1	2	6	6	6	0	2	4	0	1	3	3	0	0	0	0	2	4	0	1	3	3	0	0	0	0	2	4	0	1
sp|P52907|CAZA1_HUMAN;tr|C9JUG7|C9JUG7_HUMAN;tr|F8W9N7|F8W9N7_HUMAN;tr|A0A0D9SET8|A0A0D9SET8_HUMAN;sp|P47755|CAZA2_HUMAN	sp|P52907|CAZA1_HUMAN	1512600	2044400	2383500	1	5.21431e-07	1	1	1	1	1917800	1512600	2044400	2383500	1	1	4;1;1;1;1	4;1;1;1;1	4;1;1;1;1	sp|P52907|CAZA1_HUMAN F-actin-capping protein subunit alpha-1 OS=Homo sapiens GN=CAPZA1 PE=1 SV=3	5	4	4	4	1	0	1	0	2	3	3	3	0	1	1	0	1	0	2	3	3	3	0	1	1	0	1	0	2
sp|Q92769|HDAC2_HUMAN;tr|E5RFI6|E5RFI6_HUMAN;tr|E5RJ04|E5RJ04_HUMAN;tr|E5RGV4|E5RGV4_HUMAN;tr|E5RHE7|E5RHE7_HUMAN;tr|E5RH52|E5RH52_HUMAN;tr|E5RG37|E5RG37_HUMAN;tr|E5RFP9|E5RFP9_HUMAN;tr|H3BM24|H3BM24_HUMAN;tr|E5RK19|E5RK19_HUMAN	sp|Q92769|HDAC2_HUMAN;tr|E5RFI6|E5RFI6_HUMAN;tr|E5RJ04|E5RJ04_HUMAN;tr|E5RGV4|E5RGV4_HUMAN;tr|E5RHE7|E5RHE7_HUMAN;tr|E5RH52|E5RH52_HUMAN;tr|E5RG37|E5RG37_HUMAN;tr|E5RFP9|E5RFP9_HUMAN;tr|H3BM24|H3BM24_HUMAN	1460300	1	1	1	4.97438e-07	1	1	1	1	2010300	1460300	1	1	1	1	6;3;3;3;3;3;3;3;3;2	3;1;1;1;1;1;1;1;1;1	3;1;1;1;1;1;1;1;1;1	sp|Q92769|HDAC2_HUMAN Histone deacetylase 2 OS=Homo sapiens GN=HDAC2 PE=1 SV=2;tr|E5RFI6|E5RFI6_HUMAN Histone deacetylase 2 (Fragment) OS=Homo sapiens GN=HDAC2 PE=1 SV=1;tr|E5RJ04|E5RJ04_HUMAN Histone deacetylase 2 (Fragment) OS=Homo sapiens GN=HDAC2 PE=1	10	6	3	3	5	1	2	0	3	3	1	3	1	3	2	0	0	0	2	2	0	1	0	1	2	0	0	0	2
tr|F8VQ14|F8VQ14_HUMAN;sp|P78371|TCPB_HUMAN;tr|F5GWF6|F5GWF6_HUMAN	tr|F8VQ14|F8VQ14_HUMAN;sp|P78371|TCPB_HUMAN;tr|F5GWF6|F5GWF6_HUMAN	1286900	1397000	1	1	1	1	1	1	1	1	1286900	1397000	1	1	1	5;5;5	5;5;5	5;5;5	tr|F8VQ14|F8VQ14_HUMAN T-complex protein 1 subunit beta OS=Homo sapiens GN=CCT2 PE=1 SV=1;sp|P78371|TCPB_HUMAN T-complex protein 1 subunit beta OS=Homo sapiens GN=CCT2 PE=1 SV=4;tr|F5GWF6|F5GWF6_HUMAN T-complex protein 1 subunit beta OS=Homo sapiens GN=CCT	3	5	5	5	1	3	0	0	0	2	3	3	0	1	1	3	0	0	0	2	3	3	0	1	1	3	0	0	0
tr|K7EJT5|K7EJT5_HUMAN;tr|K7EP65|K7EP65_HUMAN;tr|K7EKS7|K7EKS7_HUMAN;tr|K7ELC4|K7ELC4_HUMAN;tr|K7EMH1|K7EMH1_HUMAN;sp|P35268|RL22_HUMAN;tr|K7ERI7|K7ERI7_HUMAN	tr|K7EJT5|K7EJT5_HUMAN;tr|K7EP65|K7EP65_HUMAN;tr|K7EKS7|K7EKS7_HUMAN;tr|K7ELC4|K7ELC4_HUMAN;tr|K7EMH1|K7EMH1_HUMAN;sp|P35268|RL22_HUMAN;tr|K7ERI7|K7ERI7_HUMAN	1283100	1	9.89022e-07	1	9.03098e-07	1	1	1011100	1	1107300	1283100	1	1	1	1	2;2;2;2;2;2;2	2;2;2;2;2;2;2	2;2;2;2;2;2;2	tr|K7EJT5|K7EJT5_HUMAN 60S ribosomal protein L22 (Fragment) OS=Homo sapiens GN=RPL22 PE=1 SV=1;tr|K7EP65|K7EP65_HUMAN 60S ribosomal protein L22 (Fragment) OS=Homo sapiens GN=RPL22 PE=1 SV=1;tr|K7EKS7|K7EKS7_HUMAN 60S ribosomal protein L22 OS=Homo sapiens G	7	2	2	2	1	1	2	0	2	2	1	1	0	1	1	1	2	0	2	2	1	1	0	1	1	1	2	0	2
sp|Q08945|SSRP1_HUMAN;tr|E9PPZ7|E9PPZ7_HUMAN;tr|E9PMD4|E9PMD4_HUMAN	sp|Q08945|SSRP1_HUMAN	1282500	1	1	1	1	1	1	1	1	1	1282500	1	1	1	1	4;1;1	4;1;1	4;1;1	sp|Q08945|SSRP1_HUMAN FACT complex subunit SSRP1 OS=Homo sapiens GN=SSRP1 PE=1 SV=1	3	4	4	4	2	1	1	0	0	3	1	1	0	0	2	1	1	0	0	3	1	1	0	0	2	1	1	0	0
sp|Q9NSD9|SYFB_HUMAN	sp|Q9NSD9|SYFB_HUMAN	1280900	0.88464	6.38366e-07	1	1	1	1563800	1566500	1	1	1280900	1383400	1	1	1	4	4	4	sp|Q9NSD9|SYFB_HUMAN Phenylalanine--tRNA ligase beta subunit OS=Homo sapiens GN=FARSB PE=1 SV=3	1	4	4	4	2	3	2	0	0	2	3	0	0	1	2	3	2	0	0	2	3	0	0	1	2	3	2	0	0
tr|F8WBR5|F8WBR5_HUMAN;tr|M0QZ52|M0QZ52_HUMAN;tr|G3V479|G3V479_HUMAN;sp|P62158|CALM_HUMAN;tr|H0Y7A7|H0Y7A7_HUMAN;tr|E7ETZ0|E7ETZ0_HUMAN;tr|E7EMB3|E7EMB3_HUMAN	tr|F8WBR5|F8WBR5_HUMAN;tr|M0QZ52|M0QZ52_HUMAN;tr|G3V479|G3V479_HUMAN;sp|P62158|CALM_HUMAN;tr|H0Y7A7|H0Y7A7_HUMAN;tr|E7ETZ0|E7ETZ0_HUMAN;tr|E7EMB3|E7EMB3_HUMAN	1255200	1	1	1	985860	1	1	1	1	1	1255200	1	1	1	985860	2;2;2;2;2;1;1	2;2;2;2;2;1;1	2;2;2;2;2;1;1	tr|F8WBR5|F8WBR5_HUMAN Calmodulin OS=Homo sapiens GN=CALM2 PE=1 SV=1;tr|M0QZ52|M0QZ52_HUMAN Calmodulin OS=Homo sapiens GN=CALM3 PE=1 SV=1;tr|G3V479|G3V479_HUMAN Calmodulin OS=Homo sapiens GN=CALM1 PE=1 SV=1;sp|P62158|CALM_HUMAN Calmodulin OS=Homo sapiens G	7	2	2	2	1	0	0	0	1	2	0	0	0	2	1	0	0	0	1	2	0	0	0	2	1	0	0	0	1
sp|Q8ND82|Z280C_HUMAN;tr|Q9UJJ2|Q9UJJ2_HUMAN	sp|Q8ND82|Z280C_HUMAN;tr|Q9UJJ2|Q9UJJ2_HUMAN	1244600	909740	1.11909e-06	1	1	1	1	893580	1	1	1244600	909740	1	1	1	4;3	4;3	4;3	sp|Q8ND82|Z280C_HUMAN Zinc finger protein 280C OS=Homo sapiens GN=ZNF280C PE=1 SV=1;tr|Q9UJJ2|Q9UJJ2_HUMAN Zinc finger protein 280C (Fragment) OS=Homo sapiens GN=ZNF280C PE=1 SV=1	2	4	4	4	0	1	2	0	0	3	2	2	0	0	0	1	2	0	0	3	2	2	0	0	0	1	2	0	0
sp|Q9BQ75|CMS1_HUMAN;tr|C9J384|C9J384_HUMAN;tr|H7C515|H7C515_HUMAN	sp|Q9BQ75|CMS1_HUMAN;tr|C9J384|C9J384_HUMAN	1227100	1	8.49041e-07	1	1	1	1	1177800	1	1	1227100	1	1	1	1	3;3;1	3;3;1	3;3;1	sp|Q9BQ75|CMS1_HUMAN Protein CMSS1 OS=Homo sapiens GN=CMSS1 PE=1 SV=2;tr|C9J384|C9J384_HUMAN Protein CMSS1 (Fragment) OS=Homo sapiens GN=CMSS1 PE=1 SV=1	3	3	3	3	1	0	2	0	0	2	1	1	0	0	1	0	2	0	0	2	1	1	0	0	1	0	2	0	0
sp|O43172|PRP4_HUMAN	sp|O43172|PRP4_HUMAN	1223400	9.995e-07	1.3889	1	1	1	1000500	1058100	1	1	1223400	1	1469600	1	1	4	4	4	sp|O43172|PRP4_HUMAN U4/U6 small nuclear ribonucleoprotein Prp4 OS=Homo sapiens GN=PRPF4 PE=1 SV=2	1	4	4	4	1	2	2	0	1	2	0	2	0	2	1	2	2	0	1	2	0	2	0	2	1	2	2	0	1
sp|P68371|TBB4B_HUMAN;sp|P04350|TBB4A_HUMAN;sp|Q3ZCM7|TBB8_HUMAN;tr|M0R0X0|M0R0X0_HUMAN;tr|M0QY85|M0QY85_HUMAN;tr|M0QY37|M0QY37_HUMAN;tr|M0QX14|M0QX14_HUMAN;tr|A0A075B724|A0A075B724_HUMAN;tr|M0QZL7|M0QZL7_HUMAN;tr|M0R278|M0R278_HUMAN	sp|P68371|TBB4B_HUMAN;sp|P04350|TBB4A_HUMAN	1215000	0.761009	4.65788e-07	1	1860300	1	4446200	2146900	1	1	1215000	3383600	1	1	1860300	15;10;6;1;1;1;1;1;1;1	4;2;1;1;1;1;1;1;1;1	2;1;1;1;1;1;1;1;1;1	sp|P68371|TBB4B_HUMAN Tubulin beta-4B chain OS=Homo sapiens GN=TUBB4B PE=1 SV=1;sp|P04350|TBB4A_HUMAN Tubulin beta-4A chain OS=Homo sapiens GN=TUBB4A PE=1 SV=2	10	15	4	2	9	12	10	5	6	8	15	11	5	9	1	3	2	0	1	2	4	1	0	2	1	2	1	0	1
sp|P14373|TRI27_HUMAN;tr|H0Y551|H0Y551_HUMAN;tr|A0A0G2JIZ4|A0A0G2JIZ4_HUMAN	sp|P14373|TRI27_HUMAN	1209600	1	1	1	1080800	1	1	1	1	1	1209600	1	1	1	1080800	3;1;1	3;1;1	3;1;1	sp|P14373|TRI27_HUMAN Zinc finger protein RFP OS=Homo sapiens GN=TRIM27 PE=1 SV=1	3	3	3	3	1	1	2	0	0	2	1	0	0	2	1	1	2	0	0	2	1	0	0	2	1	1	2	0	0
sp|Q8NCA5|FA98A_HUMAN;tr|E9PH82|E9PH82_HUMAN;tr|C9J3G8|C9J3G8_HUMAN	sp|Q8NCA5|FA98A_HUMAN;tr|E9PH82|E9PH82_HUMAN	1204400	1698800	1302900	1	1314600	1	1	1	1	1	1204400	1698800	1302900	1	1314600	3;3;1	3;3;1	3;3;1	sp|Q8NCA5|FA98A_HUMAN Protein FAM98A OS=Homo sapiens GN=FAM98A PE=1 SV=1;tr|E9PH82|E9PH82_HUMAN Protein FAM98A OS=Homo sapiens GN=FAM98A PE=1 SV=1	3	3	3	3	1	1	0	0	1	2	3	2	0	2	1	1	0	0	1	2	3	2	0	2	1	1	0	0	1
tr|A0A0G2JNN3|A0A0G2JNN3_HUMAN;sp|Q96PV6|LENG8_HUMAN;tr|A0A087WTE7|A0A087WTE7_HUMAN;tr|C9JMY0|C9JMY0_HUMAN;tr|A0A087WUE4|A0A087WUE4_HUMAN;tr|E7EWC7|E7EWC7_HUMAN	tr|A0A0G2JNN3|A0A0G2JNN3_HUMAN;sp|Q96PV6|LENG8_HUMAN;tr|A0A087WTE7|A0A087WTE7_HUMAN;tr|C9JMY0|C9JMY0_HUMAN;tr|A0A087WUE4|A0A087WUE4_HUMAN	1178000	1.09437e-06	1.07813e-06	1	968090	1	913770	927530	1	1	1178000	1	1	1	968090	5;5;5;5;5;1	5;5;5;5;5;1	5;5;5;5;5;1	tr|A0A0G2JNN3|A0A0G2JNN3_HUMAN Leukocyte receptor cluster member 8 (Fragment) OS=Homo sapiens GN=LENG8 PE=4 SV=1;sp|Q96PV6|LENG8_HUMAN Leukocyte receptor cluster member 8 OS=Homo sapiens GN=LENG8 PE=1 SV=2;tr|A0A087WTE7|A0A087WTE7_HUMAN Leukocyte receptor	6	5	5	5	2	3	2	0	1	2	2	0	0	2	2	3	2	0	1	2	2	0	0	2	2	3	2	0	1
tr|A0A0C4DGZ0|A0A0C4DGZ0_HUMAN;sp|P24928|RPB1_HUMAN;tr|A0A087WWE2|A0A087WWE2_HUMAN	tr|A0A0C4DGZ0|A0A0C4DGZ0_HUMAN;sp|P24928|RPB1_HUMAN;tr|A0A087WWE2|A0A087WWE2_HUMAN	1162600	1	1	1	1468000	1	1	1	1	1	1162600	1	1	1	1468000	5;5;5	5;5;5	5;5;5	tr|A0A0C4DGZ0|A0A0C4DGZ0_HUMAN DNA-directed RNA polymerase OS=Homo sapiens GN=POLR2A PE=1 SV=1;sp|P24928|RPB1_HUMAN DNA-directed RNA polymerase II subunit RPB1 OS=Homo sapiens GN=POLR2A PE=1 SV=2;tr|A0A087WWE2|A0A087WWE2_HUMAN DNA-directed RNA polymerase O	3	5	5	5	1	2	3	0	2	3	1	1	0	3	1	2	3	0	2	3	1	1	0	3	1	2	3	0	2
sp|Q9NZM5|GSCR2_HUMAN	sp|Q9NZM5|GSCR2_HUMAN	1141500	1	1	1	1	1	1	1	1	1	1141500	1	1	1	1	2	2	2	sp|Q9NZM5|GSCR2_HUMAN Glioma tumor suppressor candidate region gene 2 protein OS=Homo sapiens GN=GLTSCR2 PE=1 SV=2	1	2	2	2	1	0	1	0	0	2	0	1	0	1	1	0	1	0	0	2	0	1	0	1	1	0	1	0	0
sp|Q9NTI5|PDS5B_HUMAN	sp|Q9NTI5|PDS5B_HUMAN	1121600	1	1	1	1	1	1	1	1	1	1121600	1	1	1	1	4	4	4	sp|Q9NTI5|PDS5B_HUMAN Sister chromatid cohesion protein PDS5 homolog B OS=Homo sapiens GN=PDS5B PE=1 SV=1	1	4	4	4	2	1	1	0	0	2	0	1	0	0	2	1	1	0	0	2	0	1	0	0	2	1	1	0	0
sp|Q9P258|RCC2_HUMAN	sp|Q9P258|RCC2_HUMAN	1104000	0.944187	1	1	1	1	1047600	1	1	1	1104000	989130	1	1	1	3	3	3	sp|Q9P258|RCC2_HUMAN Protein RCC2 OS=Homo sapiens GN=RCC2 PE=1 SV=2	1	3	3	3	2	1	1	1	1	1	2	1	0	1	2	1	1	1	1	1	2	1	0	1	2	1	1	1	1
sp|O60293|ZC3H1_HUMAN;tr|E9PLU5|E9PLU5_HUMAN	sp|O60293|ZC3H1_HUMAN	1102900	1	1.00669e-06	1	1	1	1	993350	1	1	1102900	1	1	1	1	6;1	6;1	6;1	sp|O60293|ZC3H1_HUMAN Zinc finger C3H1 domain-containing protein OS=Homo sapiens GN=ZFC3H1 PE=1 SV=3	2	6	6	6	2	0	4	0	0	3	1	1	0	0	2	0	4	0	0	3	1	1	0	0	2	0	4	0	0
sp|P26599|PTBP1_HUMAN;tr|K7EKJ7|K7EKJ7_HUMAN;tr|U3KQ54|U3KQ54_HUMAN;tr|K7EK45|K7EK45_HUMAN;tr|K7ELW5|K7ELW5_HUMAN;tr|K7ES59|K7ES59_HUMAN;tr|A0A087WUW5|A0A087WUW5_HUMAN;tr|A0A087WU68|A0A087WU68_HUMAN;sp|O95758|PTBP3_HUMAN;tr|X6R242|X6R242_HUMAN	sp|P26599|PTBP1_HUMAN	1076400	1	1	1	1	1	1	1	1	1	1076400	1	1	1	1	14;6;6;5;4;4;3;2;2;1	1;1;0;0;0;0;0;0;0;0	1;1;0;0;0;0;0;0;0;0	sp|P26599|PTBP1_HUMAN Polypyrimidine tract-binding protein 1 OS=Homo sapiens GN=PTBP1 PE=1 SV=1	10	14	1	1	8	9	6	6	8	8	7	9	5	6	0	0	0	1	0	1	0	0	0	0	0	0	0	1	0
tr|H7BYN4|H7BYN4_HUMAN;sp|Q02241|KIF23_HUMAN;tr|H0YMJ4|H0YMJ4_HUMAN;tr|H0YME6|H0YME6_HUMAN	tr|H7BYN4|H7BYN4_HUMAN;sp|Q02241|KIF23_HUMAN	1059900	1	1	1	1	1	1	1	1	1	1059900	1	1	1	1	3;3;1;1	3;3;1;1	3;3;1;1	tr|H7BYN4|H7BYN4_HUMAN Kinesin-like protein OS=Homo sapiens GN=KIF23 PE=1 SV=1;sp|Q02241|KIF23_HUMAN Kinesin-like protein KIF23 OS=Homo sapiens GN=KIF23 PE=1 SV=3	4	3	3	3	1	1	1	0	1	2	2	0	0	0	1	1	1	0	1	2	2	0	0	0	1	1	1	0	1
tr|A0A0A6YYC3|A0A0A6YYC3_HUMAN;sp|Q9Y383|LC7L2_HUMAN;tr|A0A0A6YYJ8|A0A0A6YYJ8_HUMAN;tr|B8ZZ12|B8ZZ12_HUMAN;tr|A8MYV2|A8MYV2_HUMAN;sp|Q9NQ29|LUC7L_HUMAN	tr|A0A0A6YYC3|A0A0A6YYC3_HUMAN;sp|Q9Y383|LC7L2_HUMAN;tr|A0A0A6YYJ8|A0A0A6YYJ8_HUMAN	1000400	1.15965	1	1	1	1	747840	1	1	1	1000400	867230	1	1	1	3;3;3;1;1;1	3;3;3;1;1;1	3;3;3;1;1;1	tr|A0A0A6YYC3|A0A0A6YYC3_HUMAN Protein C7orf55-LUC7L2 OS=Homo sapiens GN=C7orf55-LUC7L2 PE=4 SV=1;sp|Q9Y383|LC7L2_HUMAN Putative RNA-binding protein Luc7-like 2 OS=Homo sapiens GN=LUC7L2 PE=1 SV=2;tr|A0A0A6YYJ8|A0A0A6YYJ8_HUMAN Putative RNA-binding protein	6	3	3	3	0	3	1	0	0	2	2	0	0	1	0	3	1	0	0	2	2	0	0	1	0	3	1	0	0
tr|C9J4M6|C9J4M6_HUMAN;tr|C9J2Y9|C9J2Y9_HUMAN;sp|P30876|RPB2_HUMAN	tr|C9J4M6|C9J4M6_HUMAN;tr|C9J2Y9|C9J2Y9_HUMAN;sp|P30876|RPB2_HUMAN	999820	1.20508e-06	1.03055e-06	1	1	1	829820	970360	1	1	999820	1	1	1	1	5;5;5	5;5;5	5;5;5	tr|C9J4M6|C9J4M6_HUMAN DNA-directed RNA polymerase OS=Homo sapiens GN=POLR2B PE=1 SV=2;tr|C9J2Y9|C9J2Y9_HUMAN DNA-directed RNA polymerase OS=Homo sapiens GN=POLR2B PE=1 SV=2;sp|P30876|RPB2_HUMAN DNA-directed RNA polymerase II subunit RPB2 OS=Homo sapiens G	3	5	5	5	1	3	3	0	1	3	1	0	0	1	1	3	3	0	1	3	1	0	0	1	1	3	3	0	1
sp|O43809|CPSF5_HUMAN;tr|H3BND3|H3BND3_HUMAN;tr|H3BV41|H3BV41_HUMAN	sp|O43809|CPSF5_HUMAN;tr|H3BND3|H3BND3_HUMAN;tr|H3BV41|H3BV41_HUMAN	968480	1185400	1.17402	1	1	1	1	883120	1	1	968480	1185400	1036800	1	1	2;2;1	2;2;1	2;2;1	sp|O43809|CPSF5_HUMAN Cleavage and polyadenylation specificity factor subunit 5 OS=Homo sapiens GN=NUDT21 PE=1 SV=1;tr|H3BND3|H3BND3_HUMAN Cleavage and polyadenylation-specificity factor subunit 5 (Fragment) OS=Homo sapiens GN=NUDT21 PE=1 SV=5;tr|H3BV41|H3	3	2	2	2	0	1	2	0	1	2	2	2	0	1	0	1	2	0	1	2	2	2	0	1	0	1	2	0	1
sp|P09874|PARP1_HUMAN	sp|P09874|PARP1_HUMAN	964470	1	1	1	1	1	1	1	1	1	964470	1	1	1	1	3	3	3	sp|P09874|PARP1_HUMAN Poly [ADP-ribose] polymerase 1 OS=Homo sapiens GN=PARP1 PE=1 SV=4	1	3	3	3	0	0	0	0	1	2	0	0	0	1	0	0	0	0	1	2	0	0	0	1	0	0	0	0	1
sp|Q8WXF1|PSPC1_HUMAN;tr|X6RDA4|X6RDA4_HUMAN	sp|Q8WXF1|PSPC1_HUMAN;tr|X6RDA4|X6RDA4_HUMAN	951980	865900	1	1	1	1	1	1	1	1	951980	865900	1	1	1	4;2	3;2	3;2	sp|Q8WXF1|PSPC1_HUMAN Paraspeckle component 1 OS=Homo sapiens GN=PSPC1 PE=1 SV=1;tr|X6RDA4|X6RDA4_HUMAN Paraspeckle component 1 (Fragment) OS=Homo sapiens GN=PSPC1 PE=1 SV=1	2	4	3	3	2	1	1	0	0	4	2	1	0	1	1	1	1	0	0	3	2	1	0	1	1	1	1	0	0
sp|O43670|ZN207_HUMAN;tr|J3QRS9|J3QRS9_HUMAN;tr|X6R4W8|X6R4W8_HUMAN;tr|J3QS27|J3QS27_HUMAN;tr|J3KTL1|J3KTL1_HUMAN;tr|J3KRB6|J3KRB6_HUMAN;tr|J3KRW6|J3KRW6_HUMAN;tr|H0Y3M2|H0Y3M2_HUMAN;tr|J3KS31|J3KS31_HUMAN	sp|O43670|ZN207_HUMAN;tr|J3QRS9|J3QRS9_HUMAN;tr|X6R4W8|X6R4W8_HUMAN;tr|J3QS27|J3QS27_HUMAN;tr|J3KTL1|J3KTL1_HUMAN;tr|J3KRB6|J3KRB6_HUMAN;tr|J3KRW6|J3KRW6_HUMAN;tr|H0Y3M2|H0Y3M2_HUMAN;tr|J3KS31|J3KS31_HUMAN	940350	934990	1188800	1	1	1	1	1	1	1	940350	934990	1188800	1	1	2;2;2;1;1;1;1;1;1	2;2;2;1;1;1;1;1;1	2;2;2;1;1;1;1;1;1	sp|O43670|ZN207_HUMAN BUB3-interacting and GLEBS motif-containing protein ZNF207 OS=Homo sapiens GN=ZNF207 PE=1 SV=1;tr|J3QRS9|J3QRS9_HUMAN BUB3-interacting and GLEBS motif-containing protein ZNF207 OS=Homo sapiens GN=ZNF207 PE=1 SV=1;tr|X6R4W8|X6R4W8_HUMA	9	2	2	2	1	1	1	0	0	2	2	2	0	1	1	1	1	0	0	2	2	2	0	1	1	1	1	0	0
sp|O43175|SERA_HUMAN;tr|Q5SZU1|Q5SZU1_HUMAN	sp|O43175|SERA_HUMAN;tr|Q5SZU1|Q5SZU1_HUMAN	830980	1	1.41389e-06	1	1	1	1	707270	1	1	830980	1	1	1	1	2;1	2;1	2;1	sp|O43175|SERA_HUMAN D-3-phosphoglycerate dehydrogenase OS=Homo sapiens GN=PHGDH PE=1 SV=4;tr|Q5SZU1|Q5SZU1_HUMAN D-3-phosphoglycerate dehydrogenase OS=Homo sapiens GN=PHGDH PE=1 SV=1	2	2	2	2	1	0	2	0	0	2	0	1	0	0	1	0	2	0	0	2	0	1	0	0	1	0	2	0	0
sp|P62826|RAN_HUMAN;tr|B5MDF5|B5MDF5_HUMAN;tr|J3KQE5|J3KQE5_HUMAN;tr|H0YFC6|H0YFC6_HUMAN;tr|F5H018|F5H018_HUMAN;tr|B4DV51|B4DV51_HUMAN	sp|P62826|RAN_HUMAN;tr|B5MDF5|B5MDF5_HUMAN;tr|J3KQE5|J3KQE5_HUMAN;tr|H0YFC6|H0YFC6_HUMAN;tr|F5H018|F5H018_HUMAN	807530	1	1	1	1	1	1	1	1	1	807530	1	1	1	1	3;3;3;2;2;1	3;3;3;2;2;1	3;3;3;2;2;1	sp|P62826|RAN_HUMAN GTP-binding nuclear protein Ran OS=Homo sapiens GN=RAN PE=1 SV=3;tr|B5MDF5|B5MDF5_HUMAN GTP-binding nuclear protein Ran OS=Homo sapiens GN=RAN PE=1 SV=1;tr|J3KQE5|J3KQE5_HUMAN GTP-binding nuclear protein Ran (Fragment) OS=Homo sapiens G	6	3	3	3	1	0	1	0	0	2	1	1	0	0	1	0	1	0	0	2	1	1	0	0	1	0	1	0	0
tr|C9JYM0|C9JYM0_HUMAN;sp|O75817|POP7_HUMAN	tr|C9JYM0|C9JYM0_HUMAN;sp|O75817|POP7_HUMAN	806310	1	1	1	1	1	1	1	1	1	806310	1	1	1	1	1;1	1;1	1;1	tr|C9JYM0|C9JYM0_HUMAN Ribonuclease P protein subunit p20 (Fragment) OS=Homo sapiens GN=POP7 PE=1 SV=1;sp|O75817|POP7_HUMAN Ribonuclease P protein subunit p20 OS=Homo sapiens GN=POP7 PE=1 SV=2	2	1	1	1	1	0	0	0	0	1	0	0	0	0	1	0	0	0	0	1	0	0	0	0	1	0	0	0	0
tr|F5H282|F5H282_HUMAN;tr|E7EQR6|E7EQR6_HUMAN;sp|P17987|TCPA_HUMAN	tr|F5H282|F5H282_HUMAN;tr|E7EQR6|E7EQR6_HUMAN;sp|P17987|TCPA_HUMAN	806060	838460	1	1	1	1	1	1	1	1	806060	838460	1	1	1	2;2;2	2;2;2	2;2;2	tr|F5H282|F5H282_HUMAN T-complex protein 1 subunit alpha OS=Homo sapiens GN=TCP1 PE=1 SV=1;tr|E7EQR6|E7EQR6_HUMAN T-complex protein 1 subunit alpha OS=Homo sapiens GN=TCP1 PE=1 SV=1;sp|P17987|TCPA_HUMAN T-complex protein 1 subunit alpha OS=Homo sapiens GN=	3	2	2	2	1	1	0	0	1	2	2	0	0	1	1	1	0	0	1	2	2	0	0	1	1	1	0	0	1
sp|Q9NQS7|INCE_HUMAN	sp|Q9NQS7|INCE_HUMAN	787600	1	1	1	1	1	1	1	1	1	787600	1	1	1	1	2	2	2	sp|Q9NQS7|INCE_HUMAN Inner centromere protein OS=Homo sapiens GN=INCENP PE=1 SV=3	1	2	2	2	0	0	0	0	0	2	0	0	0	0	0	0	0	0	0	2	0	0	0	0	0	0	0	0	0
tr|F5H6E2|F5H6E2_HUMAN;sp|O00159|MYO1C_HUMAN;tr|I3L501|I3L501_HUMAN;tr|I3L3Y6|I3L3Y6_HUMAN;tr|I3L204|I3L204_HUMAN;tr|I3L4D4|I3L4D4_HUMAN	tr|F5H6E2|F5H6E2_HUMAN;sp|O00159|MYO1C_HUMAN	758080	1.31026e-06	1	1	1	1	763210	1	1	1	758080	1	1	1	1	5;5;1;1;1;1	5;5;1;1;1;1	5;5;1;1;1;1	tr|F5H6E2|F5H6E2_HUMAN Unconventional myosin-Ic OS=Homo sapiens GN=MYO1C PE=1 SV=1;sp|O00159|MYO1C_HUMAN Unconventional myosin-Ic OS=Homo sapiens GN=MYO1C PE=1 SV=4	6	5	5	5	3	2	1	0	0	3	0	0	0	0	3	2	1	0	0	3	0	0	0	0	3	2	1	0	0
sp|Q15361|TTF1_HUMAN	sp|Q15361|TTF1_HUMAN	753060	1	1	1	1	1	1	1	1	1	753060	1	1	1	1	2	2	2	sp|Q15361|TTF1_HUMAN Transcription termination factor 1 OS=Homo sapiens GN=TTF1 PE=1 SV=3	1	2	2	2	0	0	1	0	0	2	0	0	0	0	0	0	1	0	0	2	0	0	0	0	0	0	1	0	0
sp|Q9NVU7|SDA1_HUMAN;tr|E7EW05|E7EW05_HUMAN	sp|Q9NVU7|SDA1_HUMAN;tr|E7EW05|E7EW05_HUMAN	743740	1	1	1	1	1	1	1	1	1	743740	1	1	1	1	2;1	2;1	2;1	sp|Q9NVU7|SDA1_HUMAN Protein SDA1 homolog OS=Homo sapiens GN=SDAD1 PE=1 SV=3;tr|E7EW05|E7EW05_HUMAN Protein SDA1 homolog OS=Homo sapiens GN=SDAD1 PE=1 SV=1	2	2	2	2	0	0	1	0	0	2	0	0	0	0	0	0	1	0	0	2	0	0	0	0	0	0	1	0	0
sp|Q13151|ROA0_HUMAN	sp|Q13151|ROA0_HUMAN	739190	1	1	1	1025300	1	1	1	1	1	739190	1	1	1	1025300	2	2	2	sp|Q13151|ROA0_HUMAN Heterogeneous nuclear ribonucleoprotein A0 OS=Homo sapiens GN=HNRNPA0 PE=1 SV=1	1	2	2	2	1	1	0	0	1	2	1	1	0	2	1	1	0	0	1	2	1	1	0	2	1	1	0	0	1
tr|Q5JW28|Q5JW28_HUMAN	tr|Q5JW28|Q5JW28_HUMAN	724350	1	1	1	1	1	1	1	1	1	724350	1	1	1	1	5	1	0	tr|Q5JW28|Q5JW28_HUMAN Double-stranded RNA-binding protein Staufen homolog 1 (Fragment) OS=Homo sapiens GN=STAU1 PE=1 SV=1	1	5	1	0	4	3	4	0	2	4	3	3	0	1	0	0	0	0	0	1	0	0	0	0	0	0	0	0	0
sp|P12956|XRCC6_HUMAN;tr|B1AHC9|B1AHC9_HUMAN	sp|P12956|XRCC6_HUMAN;tr|B1AHC9|B1AHC9_HUMAN	714460	1	1	1	1	1	1	1	1	1	714460	1	1	1	1	2;1	2;1	2;1	sp|P12956|XRCC6_HUMAN X-ray repair cross-complementing protein 6 OS=Homo sapiens GN=XRCC6 PE=1 SV=2;tr|B1AHC9|B1AHC9_HUMAN X-ray repair cross-complementing protein 6 OS=Homo sapiens GN=XRCC6 PE=1 SV=1	2	2	2	2	0	0	0	0	0	2	0	0	0	0	0	0	0	0	0	2	0	0	0	0	0	0	0	0	0
tr|B3KPJ4|B3KPJ4_HUMAN;tr|A0A0A0MSI2|A0A0A0MSI2_HUMAN;sp|Q8IXK0|PHC2_HUMAN;tr|H7C528|H7C528_HUMAN;sp|Q8NDX5|PHC3_HUMAN	tr|B3KPJ4|B3KPJ4_HUMAN;tr|A0A0A0MSI2|A0A0A0MSI2_HUMAN;sp|Q8IXK0|PHC2_HUMAN;tr|H7C528|H7C528_HUMAN;sp|Q8NDX5|PHC3_HUMAN	709680	1	1	1	1	1	1	1	1	1	709680	1	1	1	1	2;2;2;1;1	2;2;2;1;1	2;2;2;1;1	tr|B3KPJ4|B3KPJ4_HUMAN Polyhomeotic-like protein 2 OS=Homo sapiens GN=PHC2 PE=1 SV=1;tr|A0A0A0MSI2|A0A0A0MSI2_HUMAN Polyhomeotic-like protein 2 OS=Homo sapiens GN=PHC2 PE=1 SV=1;sp|Q8IXK0|PHC2_HUMAN Polyhomeotic-like protein 2 OS=Homo sapiens GN=PHC2 PE=1	5	2	2	2	0	0	0	0	0	2	0	0	0	0	0	0	0	0	0	2	0	0	0	0	0	0	0	0	0
tr|Q5VU77|Q5VU77_HUMAN;tr|F8W726|F8W726_HUMAN;sp|Q14157|UBP2L_HUMAN	tr|Q5VU77|Q5VU77_HUMAN;tr|F8W726|F8W726_HUMAN;sp|Q14157|UBP2L_HUMAN	709350	1	1	1	1	1	1	1	1	1	709350	1	1	1	1	2;2;2	2;2;2	2;2;2	tr|Q5VU77|Q5VU77_HUMAN Ubiquitin-associated protein 2-like (Fragment) OS=Homo sapiens GN=UBAP2L PE=1 SV=1;tr|F8W726|F8W726_HUMAN Ubiquitin-associated protein 2-like OS=Homo sapiens GN=UBAP2L PE=1 SV=2;sp|Q14157|UBP2L_HUMAN Ubiquitin-associated protein 2-li	3	2	2	2	0	0	0	0	0	2	0	0	0	0	0	0	0	0	0	2	0	0	0	0	0	0	0	0	0
sp|P47756|CAPZB_HUMAN;tr|J3KPF5|J3KPF5_HUMAN;tr|G3V132|G3V132_HUMAN;tr|B1AK85|B1AK85_HUMAN	sp|P47756|CAPZB_HUMAN;tr|J3KPF5|J3KPF5_HUMAN;tr|G3V132|G3V132_HUMAN;tr|B1AK85|B1AK85_HUMAN	698650	1	1	1	1	1	1	1	1	1	698650	1	1	1	1	2;2;2;1	2;2;2;1	2;2;2;1	sp|P47756|CAPZB_HUMAN F-actin-capping protein subunit beta OS=Homo sapiens GN=CAPZB PE=1 SV=4;tr|J3KPF5|J3KPF5_HUMAN Prostamide/prostaglandin F synthase OS=Homo sapiens GN=FAM213B PE=1 SV=1;tr|G3V132|G3V132_HUMAN Interactor protein for cytohesin exchange f	4	2	2	2	0	1	1	0	0	1	1	0	0	1	0	1	1	0	0	1	1	0	0	1	0	1	1	0	0
sp|Q76FK4|NOL8_HUMAN;tr|F8WE42|F8WE42_HUMAN;tr|F5H101|F5H101_HUMAN;tr|F5H532|F5H532_HUMAN;tr|F5H0I5|F5H0I5_HUMAN;tr|F5H8B8|F5H8B8_HUMAN;tr|A0A0A0MSJ1|A0A0A0MSJ1_HUMAN;tr|F5GWN9|F5GWN9_HUMAN;tr|F5H7D5|F5H7D5_HUMAN;tr|F5GXV1|F5GXV1_HUMAN;tr|F5H797|F5H797_HUMAN;tr|F5H692|F5H692_HUMAN	sp|Q76FK4|NOL8_HUMAN;tr|F8WE42|F8WE42_HUMAN;tr|F5H101|F5H101_HUMAN;tr|F5H532|F5H532_HUMAN;tr|F5H0I5|F5H0I5_HUMAN;tr|F5H8B8|F5H8B8_HUMAN;tr|A0A0A0MSJ1|A0A0A0MSJ1_HUMAN;tr|F5GWN9|F5GWN9_HUMAN	698310	1	1	1	1	1	1	1	1	1	698310	1	1	1	1	4;3;3;2;2;2;2;2;1;1;1;1	4;3;3;2;2;2;2;2;1;1;1;1	4;3;3;2;2;2;2;2;1;1;1;1	sp|Q76FK4|NOL8_HUMAN Nucleolar protein 8 OS=Homo sapiens GN=NOL8 PE=1 SV=1;tr|F8WE42|F8WE42_HUMAN Nucleolar protein 8 (Fragment) OS=Homo sapiens GN=NOL8 PE=1 SV=5;tr|F5H101|F5H101_HUMAN Nucleolar protein 8 OS=Homo sapiens GN=NOL8 PE=1 SV=1;tr|F5H532|F5H532	12	4	4	4	1	0	0	0	0	2	0	0	0	1	1	0	0	0	0	2	0	0	0	1	1	0	0	0	0
sp|Q6PK04|CC137_HUMAN;tr|I3L0U5|I3L0U5_HUMAN	sp|Q6PK04|CC137_HUMAN;tr|I3L0U5|I3L0U5_HUMAN	670980	697700	1	1	1	1	1	1	1	1	670980	697700	1	1	1	2;2	2;2	2;2	sp|Q6PK04|CC137_HUMAN Coiled-coil domain-containing protein 137 OS=Homo sapiens GN=CCDC137 PE=1 SV=1;tr|I3L0U5|I3L0U5_HUMAN Coiled-coil domain-containing protein 137 (Fragment) OS=Homo sapiens GN=CCDC137 PE=1 SV=1	2	2	2	2	1	1	1	0	0	2	2	0	0	1	1	1	1	0	0	2	2	0	0	1	1	1	1	0	0
sp|Q53F19|CQ085_HUMAN	sp|Q53F19|CQ085_HUMAN	670540	1.40641e-06	1	1	1.19386e-06	1	711030	1	1	837620	670540	1	1	1	1	3	3	3	sp|Q53F19|CQ085_HUMAN Uncharacterized protein C17orf85 OS=Homo sapiens GN=C17orf85 PE=1 SV=2	1	3	3	3	1	2	2	0	2	2	1	1	0	1	1	2	2	0	2	2	1	1	0	1	1	2	2	0	2
sp|Q92922|SMRC1_HUMAN;sp|Q8TAQ2|SMRC2_HUMAN;tr|F8VXC8|F8VXC8_HUMAN	sp|Q92922|SMRC1_HUMAN;sp|Q8TAQ2|SMRC2_HUMAN;tr|F8VXC8|F8VXC8_HUMAN	618760	1	1	1	1	1	1	1	1	1	618760	1	1	1	1	3;2;2	3;2;2	3;2;2	sp|Q92922|SMRC1_HUMAN SWI/SNF complex subunit SMARCC1 OS=Homo sapiens GN=SMARCC1 PE=1 SV=3;sp|Q8TAQ2|SMRC2_HUMAN SWI/SNF complex subunit SMARCC2 OS=Homo sapiens GN=SMARCC2 PE=1 SV=1;tr|F8VXC8|F8VXC8_HUMAN SWI/SNF complex subunit SMARCC2 OS=Homo sapiens GN=	3	3	3	3	1	1	0	0	1	2	1	1	0	0	1	1	0	0	1	2	1	1	0	0	1	1	0	0	1
tr|E7ENV7|E7ENV7_HUMAN;sp|Q86YQ8|CPNE8_HUMAN;sp|Q8IYJ1|CPNE9_HUMAN;sp|Q9HCH3|CPNE5_HUMAN;tr|A0A087WX62|A0A087WX62_HUMAN	tr|E7ENV7|E7ENV7_HUMAN;sp|Q86YQ8|CPNE8_HUMAN;sp|Q8IYJ1|CPNE9_HUMAN;sp|Q9HCH3|CPNE5_HUMAN	617800	1	1	1	1	1	1	1	1	1	617800	1	1	1	1	3;3;2;2;1	2;2;1;1;1	2;2;1;1;1	tr|E7ENV7|E7ENV7_HUMAN Copine-8 OS=Homo sapiens GN=CPNE8 PE=1 SV=2;sp|Q86YQ8|CPNE8_HUMAN Copine-8 OS=Homo sapiens GN=CPNE8 PE=1 SV=2;sp|Q8IYJ1|CPNE9_HUMAN Copine-9 OS=Homo sapiens GN=CPNE9 PE=1 SV=3;sp|Q9HCH3|CPNE5_HUMAN Copine-5 OS=Homo sapiens GN=CPNE5 P	5	3	2	2	1	1	2	1	0	3	1	0	0	0	0	0	1	0	0	2	0	0	0	0	0	0	1	0	0
sp|Q8WUM0|NU133_HUMAN	sp|Q8WUM0|NU133_HUMAN	617520	1	1.37878e-06	1	1	1	1	725280	1	1	617520	1	1	1	1	2	2	2	sp|Q8WUM0|NU133_HUMAN Nuclear pore complex protein Nup133 OS=Homo sapiens GN=NUP133 PE=1 SV=2	1	2	2	2	0	0	2	0	0	2	1	0	0	0	0	0	2	0	0	2	1	0	0	0	0	0	2	0	0
sp|Q9H9Y6|RPA2_HUMAN;tr|H7C0D9|H7C0D9_HUMAN	sp|Q9H9Y6|RPA2_HUMAN	615410	1	1	1	1	1	1	1	1	1	615410	1	1	1	1	3;1	3;1	3;1	sp|Q9H9Y6|RPA2_HUMAN DNA-directed RNA polymerase I subunit RPA2 OS=Homo sapiens GN=POLR1B PE=1 SV=2	2	3	3	3	1	2	0	0	0	2	2	0	0	0	1	2	0	0	0	2	2	0	0	0	1	2	0	0	0
sp|P06733|ENOA_HUMAN;tr|K7EM90|K7EM90_HUMAN	sp|P06733|ENOA_HUMAN;tr|K7EM90|K7EM90_HUMAN	600660	1	1	1	1	1	1	1	1	1	600660	1	1	1	1	2;1	2;1	2;1	sp|P06733|ENOA_HUMAN Alpha-enolase OS=Homo sapiens GN=ENO1 PE=1 SV=2;tr|K7EM90|K7EM90_HUMAN Enolase (Fragment) OS=Homo sapiens GN=ENO1 PE=1 SV=1	2	2	2	2	0	0	0	0	1	1	0	0	0	0	0	0	0	0	1	1	0	0	0	0	0	0	0	0	1
sp|P40227|TCPZ_HUMAN;sp|Q92526|TCPW_HUMAN	sp|P40227|TCPZ_HUMAN	578640	1	1	1	1	1	1	1	1	1	578640	1	1	1	1	3;1	3;1	3;1	sp|P40227|TCPZ_HUMAN T-complex protein 1 subunit zeta OS=Homo sapiens GN=CCT6A PE=1 SV=3	2	3	3	3	0	1	0	0	0	2	0	0	0	0	0	1	0	0	0	2	0	0	0	0	0	1	0	0	0
sp|Q8NGT9|OR2A1_HUMAN	sp|Q8NGT9|OR2A1_HUMAN	572570	1	1	1	1	1	1	1	1	1	572570	1	1	1	1	1	1	1	sp|Q8NGT9|OR2A1_HUMAN Olfactory receptor 2A1/2A42 OS=Homo sapiens GN=OR2A1 PE=3 SV=2	1	1	1	1	0	0	0	0	0	1	0	0	0	0	0	0	0	0	0	1	0	0	0	0	0	0	0	0	0
tr|F8VQE1|F8VQE1_HUMAN;tr|F8VS07|F8VS07_HUMAN;sp|Q9UHB6|LIMA1_HUMAN;tr|F8VRN8|F8VRN8_HUMAN	tr|F8VQE1|F8VQE1_HUMAN;tr|F8VS07|F8VS07_HUMAN;sp|Q9UHB6|LIMA1_HUMAN;tr|F8VRN8|F8VRN8_HUMAN	566440	493380	1	1	1	1	1	1	1	1	566440	493380	1	1	1	2;2;2;1	2;2;2;1	2;2;2;1	tr|F8VQE1|F8VQE1_HUMAN LIM domain and actin-binding protein 1 OS=Homo sapiens GN=LIMA1 PE=1 SV=1;tr|F8VS07|F8VS07_HUMAN LIM domain and actin-binding protein 1 OS=Homo sapiens GN=LIMA1 PE=1 SV=1;sp|Q9UHB6|LIMA1_HUMAN LIM domain and actin-binding protein 1 O	4	2	2	2	0	0	0	0	0	2	2	0	0	0	0	0	0	0	0	2	2	0	0	0	0	0	0	0	0
tr|H7C048|H7C048_HUMAN;tr|K7EMQ8|K7EMQ8_HUMAN;tr|J3QKS7|J3QKS7_HUMAN;sp|Q969G3|SMCE1_HUMAN;tr|B4DGM3|B4DGM3_HUMAN	tr|H7C048|H7C048_HUMAN;tr|K7EMQ8|K7EMQ8_HUMAN;tr|J3QKS7|J3QKS7_HUMAN;sp|Q969G3|SMCE1_HUMAN;tr|B4DGM3|B4DGM3_HUMAN	502250	1	1	1	1	1	1	1	1	1	502250	1	1	1	1	2;2;2;2;2	2;2;2;2;2	2;2;2;2;2	tr|H7C048|H7C048_HUMAN SWI/SNF-related matrix-associated actin-dependent regulator of chromatin subfamily E member 1 (Fragment) OS=Homo sapiens GN=SMARCE1 PE=1 SV=1;tr|K7EMQ8|K7EMQ8_HUMAN SWI/SNF-related matrix-associated actin-dependent regulator of chrom	5	2	2	2	0	1	0	0	0	2	0	0	0	0	0	1	0	0	0	2	0	0	0	0	0	1	0	0	0
sp|Q9NRL2|BAZ1A_HUMAN;tr|A0A087WWN7|A0A087WWN7_HUMAN	sp|Q9NRL2|BAZ1A_HUMAN	494330	1	1	1	1	1	1	1	1	1	494330	1	1	1	1	5;2	5;2	5;2	sp|Q9NRL2|BAZ1A_HUMAN Bromodomain adjacent to zinc finger domain protein 1A OS=Homo sapiens GN=BAZ1A PE=1 SV=2	2	5	5	5	1	2	1	0	0	2	1	0	0	0	1	2	1	0	0	2	1	0	0	0	1	2	1	0	0
sp|P53582|MAP11_HUMAN	sp|P53582|MAP11_HUMAN	478470	1	1	1	1	1	1	1	1	1	478470	1	1	1	1	1	1	1	sp|P53582|MAP11_HUMAN Methionine aminopeptidase 1 OS=Homo sapiens GN=METAP1 PE=1 SV=2	1	1	1	1	0	0	0	0	0	1	0	0	0	0	0	0	0	0	0	1	0	0	0	0	0	0	0	0	0
sp|Q6IQ21|ZN770_HUMAN	sp|Q6IQ21|ZN770_HUMAN	465190	1	1	1	1	1	1	1	1	1	465190	1	1	1	1	1	1	1	sp|Q6IQ21|ZN770_HUMAN Zinc finger protein 770 OS=Homo sapiens GN=ZNF770 PE=2 SV=1	1	1	1	1	1	1	0	0	1	1	0	0	0	0	1	1	0	0	1	1	0	0	0	0	1	1	0	0	1
tr|C9J406|C9J406_HUMAN;tr|B9A067|B9A067_HUMAN;sp|Q16891|MIC60_HUMAN;tr|H7C463|H7C463_HUMAN	tr|C9J406|C9J406_HUMAN;tr|B9A067|B9A067_HUMAN;sp|Q16891|MIC60_HUMAN;tr|H7C463|H7C463_HUMAN	455950	1	1	1	1	1	1	1	1	1	455950	1	1	1	1	2;2;2;2	2;2;2;2	2;2;2;2	tr|C9J406|C9J406_HUMAN MICOS complex subunit MIC60 OS=Homo sapiens GN=IMMT PE=1 SV=1;tr|B9A067|B9A067_HUMAN MICOS complex subunit MIC60 OS=Homo sapiens GN=IMMT PE=1 SV=2;sp|Q16891|MIC60_HUMAN MICOS complex subunit MIC60 OS=Homo sapiens GN=IMMT PE=1 SV=1;tr	4	2	2	2	0	1	0	0	0	1	1	0	0	0	0	1	0	0	0	1	1	0	0	0	0	1	0	0	0
tr|A0A075B784|A0A075B784_HUMAN;sp|Q9P275|UBP36_HUMAN;tr|K7EMM6|K7EMM6_HUMAN;tr|E9PEW0|E9PEW0_HUMAN	tr|A0A075B784|A0A075B784_HUMAN;sp|Q9P275|UBP36_HUMAN;tr|K7EMM6|K7EMM6_HUMAN;tr|E9PEW0|E9PEW0_HUMAN	445620	1	1	1	1	1	1	1	1	1	445620	1	1	1	1	3;3;2;2	3;3;2;2	3;3;2;2	tr|A0A075B784|A0A075B784_HUMAN Ubiquitin carboxyl-terminal hydrolase OS=Homo sapiens GN=USP36 PE=1 SV=1;sp|Q9P275|UBP36_HUMAN Ubiquitin carboxyl-terminal hydrolase 36 OS=Homo sapiens GN=USP36 PE=1 SV=3;tr|K7EMM6|K7EMM6_HUMAN Ubiquitin carboxyl-terminal hyd	4	3	3	3	0	0	0	0	0	1	1	0	0	1	0	0	0	0	0	1	1	0	0	1	0	0	0	0	0
tr|F5GYQ3|F5GYQ3_HUMAN;sp|Q9BWK5|MRI_HUMAN	tr|F5GYQ3|F5GYQ3_HUMAN;sp|Q9BWK5|MRI_HUMAN	426210	1	1	1	1	1	1	1	1	1	426210	1	1	1	1	2;2	2;2	2;2	tr|F5GYQ3|F5GYQ3_HUMAN Phospholipase B-like 1 OS=Homo sapiens GN=PLBD1 PE=4 SV=1;sp|Q9BWK5|MRI_HUMAN Modulator of retrovirus infection homolog OS=Homo sapiens GN=MRI PE=1 SV=2	2	2	2	2	0	0	1	0	0	1	0	0	0	0	0	0	1	0	0	1	0	0	0	0	0	0	1	0	0
tr|H0Y8J2|H0Y8J2_HUMAN;sp|Q03188|CENPC_HUMAN	tr|H0Y8J2|H0Y8J2_HUMAN;sp|Q03188|CENPC_HUMAN	395610	1	1	1	1	1	1	1	1	1	395610	1	1	1	1	2;2	2;2	2;2	tr|H0Y8J2|H0Y8J2_HUMAN Centromere protein C (Fragment) OS=Homo sapiens GN=CENPC PE=1 SV=1;sp|Q03188|CENPC_HUMAN Centromere protein C OS=Homo sapiens GN=CENPC PE=1 SV=2	2	2	2	2	0	0	0	0	0	1	0	0	0	1	0	0	0	0	0	1	0	0	0	1	0	0	0	0	0
sp|Q9UGU5|HMGX4_HUMAN	sp|Q9UGU5|HMGX4_HUMAN	394620	1	1	1	1	1	1	1	1	1	394620	1	1	1	1	1	1	1	sp|Q9UGU5|HMGX4_HUMAN HMG domain-containing protein 4 OS=Homo sapiens GN=HMGXB4 PE=1 SV=2	1	1	1	1	0	1	1	0	1	1	1	0	0	0	0	1	1	0	1	1	1	0	0	0	0	1	1	0	1
sp|P49327|FAS_HUMAN	sp|P49327|FAS_HUMAN	302900	1	1	1	1	1	1	1	1	1	302900	1	1	1	1	2	2	2	sp|P49327|FAS_HUMAN Fatty acid synthase OS=Homo sapiens GN=FASN PE=1 SV=3	1	2	2	2	0	0	0	0	0	2	0	0	0	0	0	0	0	0	0	2	0	0	0	0	0	0	0	0	0
tr|A0A0A0MTP7|A0A0A0MTP7_HUMAN;tr|F8VXG7|F8VXG7_HUMAN;sp|Q99590|SCAFB_HUMAN	tr|A0A0A0MTP7|A0A0A0MTP7_HUMAN;tr|F8VXG7|F8VXG7_HUMAN;sp|Q99590|SCAFB_HUMAN	280170	1	1	1	1	1	1	1	1	1	280170	1	1	1	1	1;1;1	1;1;1	1;1;1	tr|A0A0A0MTP7|A0A0A0MTP7_HUMAN Protein SCAF11 OS=Homo sapiens GN=SCAF11 PE=1 SV=1;tr|F8VXG7|F8VXG7_HUMAN Protein SCAF11 OS=Homo sapiens GN=SCAF11 PE=1 SV=1;sp|Q99590|SCAFB_HUMAN Protein SCAF11 OS=Homo sapiens GN=SCAF11 PE=1 SV=2	3	1	1	1	0	0	0	0	0	1	0	0	0	0	0	0	0	0	0	1	0	0	0	0	0	0	0	0	0
tr|F8WEG8|F8WEG8_HUMAN;tr|G5E9Q4|G5E9Q4_HUMAN;tr|C9JMM3|C9JMM3_HUMAN;sp|O75569|PRKRA_HUMAN	tr|F8WEG8|F8WEG8_HUMAN;tr|G5E9Q4|G5E9Q4_HUMAN;tr|C9JMM3|C9JMM3_HUMAN;sp|O75569|PRKRA_HUMAN	280100	1	1	1	1	1	1	1	1	1	280100	1	1	1	1	2;2;2;2	2;2;2;2	2;2;2;2	tr|F8WEG8|F8WEG8_HUMAN Interferon-inducible double-stranded RNA-dependent protein kinase activator A OS=Homo sapiens GN=PRKRA PE=1 SV=1;tr|G5E9Q4|G5E9Q4_HUMAN Interferon-inducible double-stranded RNA-dependent protein kinase activator A OS=Homo sapiens GN=	4	2	2	2	0	0	0	0	0	1	0	0	0	1	0	0	0	0	0	1	0	0	0	1	0	0	0	0	0
sp|Q14258|TRI25_HUMAN	sp|Q14258|TRI25_HUMAN	256260	1	1	1	1	1	1	1	1	1	256260	1	1	1	1	2	2	2	sp|Q14258|TRI25_HUMAN E3 ubiquitin/ISG15 ligase TRIM25 OS=Homo sapiens GN=TRIM25 PE=1 SV=2	1	2	2	2	0	0	0	0	0	1	1	0	0	0	0	0	0	0	0	1	1	0	0	0	0	0	0	0	0
sp|Q86U42|PABP2_HUMAN;tr|H0YJH9|H0YJH9_HUMAN;tr|G3V4T2|G3V4T2_HUMAN;tr|B4DEH8|B4DEH8_HUMAN	sp|Q86U42|PABP2_HUMAN;tr|H0YJH9|H0YJH9_HUMAN;tr|G3V4T2|G3V4T2_HUMAN;tr|B4DEH8|B4DEH8_HUMAN	240980	1	1	1	1	1	1	1	1	1	240980	1	1	1	1	2;1;1;1	2;1;1;1	2;1;1;1	sp|Q86U42|PABP2_HUMAN Polyadenylate-binding protein 2 OS=Homo sapiens GN=PABPN1 PE=1 SV=3;tr|H0YJH9|H0YJH9_HUMAN Polyadenylate-binding protein 2 (Fragment) OS=Homo sapiens GN=PABPN1 PE=1 SV=1;tr|G3V4T2|G3V4T2_HUMAN Polyadenylate-binding protein 2 OS=Homo s	4	2	2	2	1	0	0	0	0	1	0	0	0	0	1	0	0	0	0	1	0	0	0	0	1	0	0	0	0
sp|Q12873|CHD3_HUMAN	sp|Q12873|CHD3_HUMAN	231760	1	1	1	1	1	1	1	1	1	231760	1	1	1	1	10	2	2	sp|Q12873|CHD3_HUMAN Chromodomain-helicase-DNA-binding protein 3 OS=Homo sapiens GN=CHD3 PE=1 SV=3	1	10	2	2	4	4	4	0	2	4	1	2	0	3	0	0	0	0	0	1	0	0	0	1	0	0	0	0	0
sp|Q9HCK1|ZDBF2_HUMAN;tr|N0DVX5|N0DVX5_HUMAN	sp|Q9HCK1|ZDBF2_HUMAN;tr|N0DVX5|N0DVX5_HUMAN	1.40379	0.856085	1.18429	3771500	4735900	3401500	6209900	3386500	1	1	4775000	5316200	4010600	3771500	4735900	13;12	13;12	13;12	sp|Q9HCK1|ZDBF2_HUMAN DBF4-type zinc finger-containing protein 2 OS=Homo sapiens GN=ZDBF2 PE=1 SV=3;tr|N0DVX5|N0DVX5_HUMAN DBF4-type zinc finger-containing protein 2 OS=Homo sapiens GN=ZDBF2 PE=1 SV=1	2	13	13	13	3	7	4	1	1	6	7	5	3	4	3	7	4	1	1	6	7	5	3	4	3	7	4	1	1
sp|Q5QGS0|K2022_HUMAN;CON__P13647;CON__Q5XQN5;CON__P02538;CON__P48668;CON__P04259;CON__Q922U2;CON__P50446;tr|F8W1Z5|F8W1Z5_HUMAN;CON__ENSEMBL:ENSBTAP00000038253;tr|H0YCA0|H0YCA0_HUMAN;CON__P12035;tr|H0YIE9|H0YIE9_HUMAN;CON__Q01546;CON__Q5XKE5;CON__O95678;CON__Q8BGZ7;CON__Q3TTY5;tr|F8VRE4|F8VRE4_HUMAN;CON__Q8VED5;CON__H-INV:HIT000292931;tr|F8W1F1|F8W1F1_HUMAN;CON__Q6IFZ6;tr|D6R9Y5|D6R9Y5_HUMAN;CON…	sp|Q5QGS0|K2022_HUMAN	2.34818	2.08315	0.627382	1.97189	0.542768	83141000	173660000	257180000	611900000	775230000	195230000	361760000	161350000	1206600000	420770000	120;29;25;24;23;22;21;15;14;12;11;10;10;9;9;9;9;8;8;8;7;7;5;5;4;4;4;4;4;4;4;3;3;3;3;3;3;3;3;2;2;2;2;2;2;2;2;2;1;1;1;1;1;1;1;1;1;1;1	120;29;25;24;23;22;21;15;14;12;11;10;10;9;9;9;9;8;8;8;7;7;5;5;4;4;4;4;4;4;4;3;3;3;3;3;3;3;3;2;2;2;2;2;2;2;2;2;1;1;1;1;1;1;1;1;1;1;1	35;19;12;15;14;13;10;7;8;0;8;1;8;0;2;3;2;0;0;2;0;0;0;0;0;0;0;0;2;0;0;0;2;2;2;2;0;0;0;0;1;0;1;1;1;0;0;0;0;0;0;0;0;0;0;0;0;0;1	sp|Q5QGS0|K2022_HUMAN Protein KIAA2022 OS=Homo sapiens GN=KIAA2022 PE=2 SV=1	59	120	120	35	28	49	50	52	84	43	65	38	67	69	28	49	50	52	84	43	65	38	67	69	2	5	8	7	26
sp|Q06787|FMR1_HUMAN;tr|G8JLE9|G8JLE9_HUMAN;tr|A8MQB8|A8MQB8_HUMAN;tr|A0A087WXI3|A0A087WXI3_HUMAN;tr|R9WNI0|R9WNI0_HUMAN;tr|A0A0G2JM53|A0A0G2JM53_HUMAN;tr|Q8IXW7|Q8IXW7_HUMAN;tr|A0A087WY29|A0A087WY29_HUMAN;tr|A0A087WWR6|A0A087WWR6_HUMAN;tr|A0A087X1M7|A0A087X1M7_HUMAN;tr|A0A087WWU4|A0A087WWU4_HUMAN	sp|Q06787|FMR1_HUMAN;tr|G8JLE9|G8JLE9_HUMAN;tr|A8MQB8|A8MQB8_HUMAN;tr|A0A087WXI3|A0A087WXI3_HUMAN;tr|R9WNI0|R9WNI0_HUMAN;tr|A0A0G2JM53|A0A0G2JM53_HUMAN;tr|Q8IXW7|Q8IXW7_HUMAN	2.3321	1.18568	2719400	1	0.736352	1943700	1681900	1	1	2566300	4532900	1994200	2719400	1	1889700	10;9;9;8;8;8;6;4;2;1;1	8;8;7;7;6;6;5;3;1;1;1	8;8;7;7;6;6;5;3;1;1;1	sp|Q06787|FMR1_HUMAN Fragile X mental retardation protein 1 OS=Homo sapiens GN=FMR1 PE=1 SV=1;tr|G8JLE9|G8JLE9_HUMAN Fragile X mental retardation protein 1 OS=Homo sapiens GN=FMR1 PE=1 SV=1;tr|A8MQB8|A8MQB8_HUMAN Fragile X mental retardation protein 1 OS=H	11	10	8	8	6	4	3	2	5	6	4	3	1	6	4	3	1	0	3	4	2	2	0	4	4	3	1	0	3
sp|Q9NU22|MDN1_HUMAN;tr|Q5T795|Q5T795_HUMAN;tr|M0QXR3|M0QXR3_HUMAN	sp|Q9NU22|MDN1_HUMAN	2.14111	1.13562e-06	1	1	3.09292	2941000	880580	1	1	1161200	6297000	1	1	1	3591500	21;8;1	21;8;1	21;8;1	sp|Q9NU22|MDN1_HUMAN Midasin OS=Homo sapiens GN=MDN1 PE=1 SV=2	3	21	21	21	9	2	0	0	2	12	0	1	1	9	9	2	0	0	2	12	0	1	1	9	9	2	0	0	2
sp|P62857|RS28_HUMAN	sp|P62857|RS28_HUMAN	2.12489	0.688729	0.660983	1.6824e-07	1	5915600	18463000	14022000	5943900	1	12570000	12716000	9268300	1	1	3	3	3	sp|P62857|RS28_HUMAN 40S ribosomal protein S28 OS=Homo sapiens GN=RPS28 PE=1 SV=1	1	3	3	3	3	2	2	2	1	2	2	2	1	1	3	2	2	2	1	2	2	2	1	1	3	2	2	2	1
sp|Q9BYX7|ACTBM_HUMAN;sp|O43707|ACTN4_HUMAN;sp|Q9UKU0|ACSL6_HUMAN;sp|Q01718|ACTHR_HUMAN;tr|M0QYC8|M0QYC8_HUMAN;tr|H0Y3X1|H0Y3X1_HUMAN;tr|H3BPX1|H3BPX1_HUMAN;tr|J3QRD3|J3QRD3_HUMAN;tr|F8WET3|F8WET3_HUMAN;tr|J3QKU0|J3QKU0_HUMAN;tr|C9JY72|C9JY72_HUMAN;tr|F8VVU7|F8VVU7_HUMAN;tr|J3KQD8|J3KQD8_HUMAN;tr|C9J613|C9J613_HUMAN;tr|F2Z2V1|F2Z2V1_HUMAN;sp|Q6S8J3|POTEE_HUMAN;sp|A5A3E0|POTEF_HUMAN;tr|E9PL61|E9PL…	sp|Q9BYX7|ACTBM_HUMAN;sp|O43707|ACTN4_HUMAN;sp|Q9UKU0|ACSL6_HUMAN;sp|Q01718|ACTHR_HUMAN;tr|M0QYC8|M0QYC8_HUMAN;tr|H0Y3X1|H0Y3X1_HUMAN;tr|H3BPX1|H3BPX1_HUMAN	1.7932	2.38361	2.43775	1.42827	1.07198	67137000	65984000	55223000	71653000	94778000	120390000	157280000	134620000	102340000	101600000	18;12;11;11;10;10;10;8;7;7;7;7;7;7;7;6;6;6;6;6;5;5;4;3;3	12;6;5;5;5;5;4;5;1;2;1;2;2;1;2;3;3;1;1;0;2;0;3;2;0	10;5;5;5;3;3;3;3;1;0;1;0;0;1;0;2;2;0;0;0;1;0;3;1;0	sp|Q9BYX7|ACTBM_HUMAN Putative beta-actin-like protein 3 OS=Homo sapiens GN=POTEKP PE=5 SV=1;sp|O43707|ACTN4_HUMAN Alpha-actinin-4 OS=Homo sapiens GN=ACTN4 PE=1 SV=2;sp|Q9UKU0|ACSL6_HUMAN Long-chain-fatty-acid--CoA ligase 6 OS=Homo sapiens GN=ACSL6 PE=2 SV	25	18	12	10	12	10	12	11	14	14	14	12	14	13	7	6	9	6	10	9	10	8	8	9	6	4	7	5	8
sp|Q8N8K9|K1958_HUMAN;CON__P13645;CON__P35527;CON__P08779;CON__P02533;tr|A8MVH1|A8MVH1_HUMAN;CON__Q6IFX2;CON__P02535-1;CON__Q9QWL7;tr|H3BUK1|H3BUK1_HUMAN;CON__P13646-1;CON__P19012;CON__P08730-1;CON__A2A4G1;CON__ENSEMBL:ENSP00000377550;CON__Q9Z2K1;CON__Q04695;CON__P08727;CON__Q3ZAW8;tr|E5RHT5|E5RHT5_HUMAN;tr|C9JMM4|C9JMM4_HUMAN;tr|A0A087X236|A0A087X236_HUMAN;tr|A0A0G2JKI4|A0A0G2JKI4_HUMAN;tr|J3KRQ…	sp|Q8N8K9|K1958_HUMAN	2.00642	1.8748	0.711916	1.77311	0.679291	59768000	142810000	178420000	494170000	510900000	119920000	267740000	127020000	876220000	347050000	90;31;30;17;17;14;9;8;6;6;6;6;6;6;6;5;5;5;5;5;4;4;4;4;4;4;4;3;3;2;2;2;2;2;2;2;2;1;1;1;1;1;1;1	90;31;30;17;17;14;9;8;6;6;6;6;6;6;6;5;5;5;5;5;4;4;4;4;4;4;4;3;3;2;2;2;2;2;2;2;2;1;1;1;1;1;1;1	90;31;30;17;17;14;9;8;6;6;6;6;6;6;6;5;5;5;5;5;4;4;4;4;4;4;4;3;3;2;2;2;2;2;2;2;2;1;1;1;1;1;1;1	sp|Q8N8K9|K1958_HUMAN Uncharacterized protein KIAA1958 OS=Homo sapiens GN=KIAA1958 PE=1 SV=1	44	90	90	90	26	37	49	40	61	31	46	35	48	57	26	37	49	40	61	31	46	35	48	57	26	37	49	40	61
sp|Q9NVX2|NLE1_HUMAN;tr|A0A0A0MRH0|A0A0A0MRH0_HUMAN;tr|K7EN33|K7EN33_HUMAN;tr|K7ERN7|K7ERN7_HUMAN	sp|Q9NVX2|NLE1_HUMAN;tr|A0A0A0MRH0|A0A0A0MRH0_HUMAN;tr|K7EN33|K7EN33_HUMAN	1.31705	2.57301	1.53519	1.35105	1.82328	5376100	2470300	5483700	4033300	6545900	7080600	6356100	8418500	5449200	11935000	8;7;5;2	8;7;5;2	8;7;5;2	sp|Q9NVX2|NLE1_HUMAN Notchless protein homolog 1 OS=Homo sapiens GN=NLE1 PE=1 SV=4;tr|A0A0A0MRH0|A0A0A0MRH0_HUMAN Notchless protein homolog 1 OS=Homo sapiens GN=NLE1 PE=1 SV=1;tr|K7EN33|K7EN33_HUMAN Notchless protein homolog 1 (Fragment) OS=Homo sapiens GN	4	8	8	8	6	2	4	2	5	5	6	6	3	6	6	2	4	2	5	5	6	6	3	6	6	2	4	2	5
sp|P78527|PRKDC_HUMAN	sp|P78527|PRKDC_HUMAN	1.82808	1140500	8.1057e-07	1	1	1707800	1	1233700	1	1	3122000	1140500	1	1	1	13	13	13	sp|P78527|PRKDC_HUMAN DNA-dependent protein kinase catalytic subunit OS=Homo sapiens GN=PRKDC PE=1 SV=3	1	13	13	13	5	1	3	0	0	9	3	1	0	1	5	1	3	0	0	9	3	1	0	1	5	1	3	0	0
sp|Q9BQA1|MEP50_HUMAN;tr|H0Y711|H0Y711_HUMAN	sp|Q9BQA1|MEP50_HUMAN;tr|H0Y711|H0Y711_HUMAN	1.16515	1.77367	1.17989	43233000	1.1959	46763000	35214000	43344000	1	41092000	54486000	62458000	51141000	43233000	49142000	9;5	9;5	9;5	sp|Q9BQA1|MEP50_HUMAN Methylosome protein 50 OS=Homo sapiens GN=WDR77 PE=1 SV=1;tr|H0Y711|H0Y711_HUMAN Methylosome protein 50 (Fragment) OS=Homo sapiens GN=WDR77 PE=1 SV=1	2	9	9	9	6	5	5	1	2	4	4	4	3	4	6	5	5	1	2	4	4	4	3	4	6	5	5	1	2
sp|Q969X6|CIR1A_HUMAN;tr|H3BSH7|H3BSH7_HUMAN;tr|H3BPD7|H3BPD7_HUMAN;tr|I3L4T9|I3L4T9_HUMAN;tr|J3KSI1|J3KSI1_HUMAN;tr|H3BRM8|H3BRM8_HUMAN;tr|J3KSE6|J3KSE6_HUMAN;tr|J3KTR0|J3KTR0_HUMAN	sp|Q969X6|CIR1A_HUMAN;tr|H3BSH7|H3BSH7_HUMAN	1.11002	1.77953	5247900	0.87148	1.6229	6291400	3367400	1	5586700	5444500	6983600	5992400	5247900	4868700	8835900	13;12;5;4;3;3;1;1	13;12;5;4;3;3;1;1	13;12;5;4;3;3;1;1	sp|Q969X6|CIR1A_HUMAN Cirhin OS=Homo sapiens GN=CIRH1A PE=1 SV=1;tr|H3BSH7|H3BSH7_HUMAN Cirhin (Fragment) OS=Homo sapiens GN=CIRH1A PE=1 SV=1	8	13	13	13	5	4	1	2	6	5	6	3	3	7	5	4	1	2	6	5	6	3	3	7	5	4	1	2	6
sp|P55769|NH2L1_HUMAN;tr|B1AHD1|B1AHD1_HUMAN	sp|P55769|NH2L1_HUMAN;tr|B1AHD1|B1AHD1_HUMAN	1.00746	6507900	1.17154	1.55649	1.86326	11124000	1	7173800	6328400	5761400	11207000	6507900	8404400	9850100	10735000	4;4	4;4	4;4	sp|P55769|NH2L1_HUMAN NHP2-like protein 1 OS=Homo sapiens GN=NHP2L1 PE=1 SV=3;tr|B1AHD1|B1AHD1_HUMAN NHP2-like protein 1 OS=Homo sapiens GN=NHP2L1 PE=1 SV=1	2	4	4	4	3	1	2	2	2	3	2	2	3	3	3	1	2	2	2	3	2	2	3	3	3	1	2	2	2
sp|P42696|RBM34_HUMAN;tr|A2A2V2|A2A2V2_HUMAN;tr|Q5TCT4|Q5TCT4_HUMAN;tr|H7C5M1|H7C5M1_HUMAN	sp|P42696|RBM34_HUMAN;tr|A2A2V2|A2A2V2_HUMAN	1.74089	1.63157	2.04595	1	1.04317	2602400	2557600	3323500	1	2399700	4530500	4172900	6799700	1	2503300	12;10;4;2	12;10;4;2	12;10;4;2	sp|P42696|RBM34_HUMAN RNA-binding protein 34 OS=Homo sapiens GN=RBM34 PE=1 SV=2;tr|A2A2V2|A2A2V2_HUMAN RNA-binding protein 34 (Fragment) OS=Homo sapiens GN=RBM34 PE=1 SV=1	4	12	12	12	5	3	4	0	2	4	6	8	0	2	5	3	4	0	2	4	6	8	0	2	5	3	4	0	2
sp|P56537|IF6_HUMAN;tr|B7ZBH1|B7ZBH1_HUMAN;tr|F8WD20|F8WD20_HUMAN;tr|A0A0B4J1Y7|A0A0B4J1Y7_HUMAN;tr|F8WDS6|F8WDS6_HUMAN	sp|P56537|IF6_HUMAN	1.17934	1.44241	2.2508	1.10287	1.60285	23637000	27043000	32217000	36209000	37694000	27876000	39007000	72514000	39934000	60418000	9;3;1;1;1	9;3;1;1;1	9;3;1;1;1	sp|P56537|IF6_HUMAN Eukaryotic translation initiation factor 6 OS=Homo sapiens GN=EIF6 PE=1 SV=1	5	9	9	9	7	5	5	4	6	4	5	5	5	6	7	5	5	4	6	4	5	5	5	6	7	5	5	4	6
sp|P05455|LA_HUMAN;tr|E7ERC4|E7ERC4_HUMAN;tr|E9PGX9|E9PGX9_HUMAN;tr|E9PFL9|E9PFL9_HUMAN	sp|P05455|LA_HUMAN;tr|E7ERC4|E7ERC4_HUMAN	1.70862	1.22314	5.99233e-07	1	0.972805	1223500	2601000	1668800	1	2040800	2090500	3181400	1	1	1985300	8;6;3;3	8;6;3;3	8;6;3;3	sp|P05455|LA_HUMAN Lupus La protein OS=Homo sapiens GN=SSB PE=1 SV=2;tr|E7ERC4|E7ERC4_HUMAN Lupus La protein (Fragment) OS=Homo sapiens GN=SSB PE=1 SV=1	4	8	8	8	2	3	4	0	3	2	4	2	0	3	2	3	4	0	3	2	4	2	0	3	2	3	4	0	3
sp|Q8IY37|DHX37_HUMAN;tr|F5H3Y4|F5H3Y4_HUMAN	sp|Q8IY37|DHX37_HUMAN;tr|F5H3Y4|F5H3Y4_HUMAN	1.64465	1.17394	1.3612	3182500	1.04648	2652600	2884900	2662500	1	4636600	4362600	3386700	3624200	3182500	4852100	13;10	13;10	13;10	sp|Q8IY37|DHX37_HUMAN Probable ATP-dependent RNA helicase DHX37 OS=Homo sapiens GN=DHX37 PE=1 SV=1;tr|F5H3Y4|F5H3Y4_HUMAN Probable ATP-dependent RNA helicase DHX37 OS=Homo sapiens GN=DHX37 PE=1 SV=1	2	13	13	13	7	5	4	1	8	8	5	2	3	7	7	5	4	1	8	8	5	2	3	7	7	5	4	1	8
sp|Q9Y3C1|NOP16_HUMAN;tr|D6RIC3|D6RIC3_HUMAN;tr|A0A0C4DGU5|A0A0C4DGU5_HUMAN;tr|A0A087X2G6|A0A087X2G6_HUMAN;tr|A0A087X1T1|A0A087X1T1_HUMAN;tr|D6RC60|D6RC60_HUMAN	sp|Q9Y3C1|NOP16_HUMAN;tr|D6RIC3|D6RIC3_HUMAN;tr|A0A0C4DGU5|A0A0C4DGU5_HUMAN;tr|A0A087X2G6|A0A087X2G6_HUMAN;tr|A0A087X1T1|A0A087X1T1_HUMAN	1.69265	0.923248	1.07257	6791600	1.28183	5722100	6068900	6330300	1	7447800	9685500	5603100	6789700	6791600	9546800	7;6;6;6;5;1	7;6;6;6;5;1	7;6;6;6;5;1	sp|Q9Y3C1|NOP16_HUMAN Nucleolar protein 16 OS=Homo sapiens GN=NOP16 PE=1 SV=2;tr|D6RIC3|D6RIC3_HUMAN Nucleolar protein 16 OS=Homo sapiens GN=NOP16 PE=1 SV=1;tr|A0A0C4DGU5|A0A0C4DGU5_HUMAN Nucleolar protein 16 OS=Homo sapiens GN=NOP16 PE=1 SV=1;tr|A0A087X2G	6	7	7	7	7	3	4	1	7	6	5	5	4	5	7	3	4	1	7	6	5	5	4	5	7	3	4	1	7
sp|Q9UMY1|NOL7_HUMAN;tr|H7C2B1|H7C2B1_HUMAN	sp|Q9UMY1|NOL7_HUMAN;tr|H7C2B1|H7C2B1_HUMAN	3341200	1.03342	1.27364	1.33565	1.21696	1	2283100	3642800	3073700	3616800	3341200	2359400	4639600	4105400	4401500	7;4	7;4	7;4	sp|Q9UMY1|NOL7_HUMAN Nucleolar protein 7 OS=Homo sapiens GN=NOL7 PE=1 SV=2;tr|H7C2B1|H7C2B1_HUMAN Nucleolar protein 7 (Fragment) OS=Homo sapiens GN=NOL7 PE=1 SV=1	2	7	7	7	1	3	3	2	2	5	3	2	2	5	1	3	3	2	2	5	3	2	2	5	1	3	3	2	2
sp|O76021|RL1D1_HUMAN;tr|J3QSV6|J3QSV6_HUMAN;tr|I3L3U9|I3L3U9_HUMAN;tr|I3L3C4|I3L3C4_HUMAN;tr|I3L234|I3L234_HUMAN;tr|J3KPU7|J3KPU7_HUMAN;tr|I3L2F2|I3L2F2_HUMAN;tr|I3L4T8|I3L4T8_HUMAN;tr|I3L1Y4|I3L1Y4_HUMAN	sp|O76021|RL1D1_HUMAN;tr|J3QSV6|J3QSV6_HUMAN;tr|I3L3U9|I3L3U9_HUMAN	1.68614	0.85253	0.666949	1.32106	1.74551	12340000	9269000	12175000	11409000	15384000	20807000	7902100	8120100	15072000	26853000	19;18;10;8;5;1;1;1;1	19;18;10;8;5;1;1;1;1	18;17;9;8;5;1;1;1;1	sp|O76021|RL1D1_HUMAN Ribosomal L1 domain-containing protein 1 OS=Homo sapiens GN=RSL1D1 PE=1 SV=3;tr|J3QSV6|J3QSV6_HUMAN Ribosomal L1 domain-containing protein 1 (Fragment) OS=Homo sapiens GN=RSL1D1 PE=1 SV=1;tr|I3L3U9|I3L3U9_HUMAN Ribosomal L1 domain-con	9	19	19	18	12	6	7	4	5	13	5	4	6	7	12	6	7	4	5	13	5	4	6	7	11	6	7	4	4
sp|Q9H9Y2|RPF1_HUMAN	sp|Q9H9Y2|RPF1_HUMAN	2.54123	1.25083	1.21127	1.09827	1.58177	4081100	4893300	4045500	6438400	6205000	10371000	6120700	4900200	7071100	9814900	9	9	9	sp|Q9H9Y2|RPF1_HUMAN Ribosome production factor 1 OS=Homo sapiens GN=RPF1 PE=1 SV=2	1	9	9	9	4	3	3	3	5	7	5	4	6	7	4	3	3	3	5	7	5	4	6	7	4	3	3	3	5
sp|Q9UHA3|RLP24_HUMAN;tr|H3BMQ2|H3BMQ2_HUMAN;tr|F5H823|F5H823_HUMAN;tr|A0A0D9SF81|A0A0D9SF81_HUMAN;tr|B4DLN1|B4DLN1_HUMAN;tr|H3BVC9|H3BVC9_HUMAN;tr|A0A0D9SEU5|A0A0D9SEU5_HUMAN	sp|Q9UHA3|RLP24_HUMAN	1.21431	12925000	1.08883	1.23967	1.06397	9548600	1	8455500	9728400	10864000	11595000	12925000	9206600	12060000	11559000	10;2;1;1;1;1;1	10;2;1;1;1;1;1	10;2;1;1;1;1;1	sp|Q9UHA3|RLP24_HUMAN Probable ribosome biogenesis protein RLP24 OS=Homo sapiens GN=RSL24D1 PE=1 SV=1	7	10	10	10	3	3	4	3	4	3	4	2	2	4	3	3	4	3	4	3	4	2	2	4	3	3	4	3	4
sp|Q5QJE6|TDIF2_HUMAN;tr|J3KP30|J3KP30_HUMAN	sp|Q5QJE6|TDIF2_HUMAN;tr|J3KP30|J3KP30_HUMAN	1.2013	1.18771	1.02053	2888100	1.45771	3022900	2052600	3136300	1	2530000	3631400	2437900	3200700	2888100	3688000	10;5	10;5	10;5	sp|Q5QJE6|TDIF2_HUMAN Deoxynucleotidyltransferase terminal-interacting protein 2 OS=Homo sapiens GN=DNTTIP2 PE=1 SV=2;tr|J3KP30|J3KP30_HUMAN Deoxynucleotidyltransferase terminal-interacting protein 2 OS=Homo sapiens GN=DNTTIP2 PE=1 SV=1	2	10	10	10	4	6	4	1	3	6	4	5	3	2	4	6	4	1	3	6	4	5	3	2	4	6	4	1	3
sp|Q13868|EXOS2_HUMAN;tr|A3KFL2|A3KFL2_HUMAN;tr|A3KFL5|A3KFL5_HUMAN;tr|A3KFL1|A3KFL1_HUMAN	sp|Q13868|EXOS2_HUMAN;tr|A3KFL2|A3KFL2_HUMAN;tr|A3KFL5|A3KFL5_HUMAN;tr|A3KFL1|A3KFL1_HUMAN	1.19065	1.28276	1.11924	6203600	1.25649	6052900	5921200	6163800	1	6134700	7206900	7595500	6898800	6203600	7708200	8;7;6;5	8;7;6;5	8;7;6;5	sp|Q13868|EXOS2_HUMAN Exosome complex component RRP4 OS=Homo sapiens GN=EXOSC2 PE=1 SV=2;tr|A3KFL2|A3KFL2_HUMAN Exosome complex component RRP4 OS=Homo sapiens GN=EXOSC2 PE=1 SV=1;tr|A3KFL5|A3KFL5_HUMAN Exosome complex component RRP4 (Fragment) OS=Homo sapi	4	8	8	8	3	4	3	1	2	4	5	3	2	6	3	4	3	1	2	4	5	3	2	6	3	4	3	1	2
tr|E9PLL6|E9PLL6_HUMAN;sp|P46776|RL27A_HUMAN;tr|E9PJD9|E9PJD9_HUMAN;tr|E9PLX7|E9PLX7_HUMAN	tr|E9PLL6|E9PLL6_HUMAN;sp|P46776|RL27A_HUMAN;tr|E9PJD9|E9PJD9_HUMAN	30556000	1.05911	0.903093	0.947778	28874000	1	43089000	59645000	16564000	1	30556000	45636000	53865000	15699000	28874000	4;4;2;1	4;4;2;1	4;4;2;1	tr|E9PLL6|E9PLL6_HUMAN 60S ribosomal protein L27a OS=Homo sapiens GN=RPL27A PE=1 SV=1;sp|P46776|RL27A_HUMAN 60S ribosomal protein L27a OS=Homo sapiens GN=RPL27A PE=1 SV=2;tr|E9PJD9|E9PJD9_HUMAN 60S ribosomal protein L27a OS=Homo sapiens GN=RPL27A PE=1 SV=1	4	4	4	4	1	2	2	3	2	2	2	3	2	2	1	2	2	3	2	2	2	3	2	2	1	2	2	3	2
sp|O15213|WDR46_HUMAN;tr|H0Y6G3|H0Y6G3_HUMAN	sp|O15213|WDR46_HUMAN	1.57154	0.829973	1.1267	1	1.21293	4126900	4166400	3246200	1	4307000	6485600	3458000	3657500	1	5224100	11;5	11;5	6;0	sp|O15213|WDR46_HUMAN WD repeat-containing protein 46 OS=Homo sapiens GN=WDR46 PE=1 SV=3	2	11	11	6	5	3	4	1	7	5	4	5	1	9	5	3	4	1	7	5	4	5	1	9	4	1	1	0	4
tr|A0A0A0MTB8|A0A0A0MTB8_HUMAN;sp|Q8NI36|WDR36_HUMAN	tr|A0A0A0MTB8|A0A0A0MTB8_HUMAN;sp|Q8NI36|WDR36_HUMAN	1.15408	1.04706	2.40423	1.73472	1.77002	14888000	8932100	3417600	4845000	10388000	17182000	9352400	8216700	8404700	18387000	20;20	20;20	20;20	tr|A0A0A0MTB8|A0A0A0MTB8_HUMAN WD repeat-containing protein 36 OS=Homo sapiens GN=WDR36 PE=1 SV=1;sp|Q8NI36|WDR36_HUMAN WD repeat-containing protein 36 OS=Homo sapiens GN=WDR36 PE=1 SV=1	2	20	20	20	15	7	4	3	11	12	7	6	5	17	15	7	4	3	11	12	7	6	5	17	15	7	4	3	11
sp|Q5RKV6|EXOS6_HUMAN	sp|Q5RKV6|EXOS6_HUMAN	1.27127	0.872749	1.19292	1.27028	4315400	3110500	4226300	3572400	3352100	1	3954300	3688500	4261600	4258100	4315400	5	5	5	sp|Q5RKV6|EXOS6_HUMAN Exosome complex component MTR3 OS=Homo sapiens GN=EXOSC6 PE=1 SV=1	1	5	5	5	2	3	2	2	1	4	3	2	3	4	2	3	2	2	1	4	3	2	3	4	2	3	2	2	1
tr|E7EVG2|E7EVG2_HUMAN;sp|Q86U86|PB1_HUMAN;tr|H0Y5B5|H0Y5B5_HUMAN;tr|C9JPI5|C9JPI5_HUMAN;tr|C9JQF1|C9JQF1_HUMAN	tr|E7EVG2|E7EVG2_HUMAN;sp|Q86U86|PB1_HUMAN;tr|H0Y5B5|H0Y5B5_HUMAN	1.56427	2.83094e-07	1.02848	1	1	1642300	3532400	1804700	1	1	2569000	1	1856100	1	1	11;11;9;2;1	11;11;9;2;1	11;11;9;2;1	tr|E7EVG2|E7EVG2_HUMAN Protein polybromo-1 (Fragment) OS=Homo sapiens GN=PBRM1 PE=1 SV=5;sp|Q86U86|PB1_HUMAN Protein polybromo-1 OS=Homo sapiens GN=PBRM1 PE=1 SV=1;tr|H0Y5B5|H0Y5B5_HUMAN Protein polybromo-1 (Fragment) OS=Homo sapiens GN=PBRM1 PE=1 SV=1	5	11	11	11	2	8	4	0	0	5	2	4	0	2	2	8	4	0	0	5	2	4	0	2	2	8	4	0	0
sp|P08238|HS90B_HUMAN;sp|Q58FF7|H90B3_HUMAN;tr|F8W026|F8W026_HUMAN;tr|Q96GW1|Q96GW1_HUMAN;sp|P14625|ENPL_HUMAN	sp|P08238|HS90B_HUMAN	1.56406	1.51523	1.41848	1	3.27869e-07	4501500	3306300	5162500	1	3050000	7040600	5009800	7322900	1	1	12;3;2;2;2	12;3;2;2;2	6;1;2;2;2	sp|P08238|HS90B_HUMAN Heat shock protein HSP 90-beta OS=Homo sapiens GN=HSP90AB1 PE=1 SV=4	5	12	12	6	6	3	5	1	4	9	5	6	1	1	6	3	5	1	4	9	5	6	1	1	2	1	3	0	1
sp|Q9BXY0|MAK16_HUMAN;tr|H0YBV6|H0YBV6_HUMAN	sp|Q9BXY0|MAK16_HUMAN	1.34017	1.34912	1.73279	1.13566	1.60021	5992900	5091700	4871900	7754500	9440000	8031500	6869300	8442000	8806500	15106000	6;2	6;2	6;2	sp|Q9BXY0|MAK16_HUMAN Protein MAK16 homolog OS=Homo sapiens GN=MAK16 PE=1 SV=2	2	6	6	6	4	3	5	3	2	4	4	5	3	3	4	3	5	3	2	4	4	5	3	3	4	3	5	3	2
tr|F6VRR5|F6VRR5_HUMAN;sp|Q9BY77|PDIP3_HUMAN;tr|Q8WUT1|Q8WUT1_HUMAN;tr|F8WCX5|F8WCX5_HUMAN;tr|Q6R954|Q6R954_HUMAN;tr|F8WEE2|F8WEE2_HUMAN	tr|F6VRR5|F6VRR5_HUMAN;sp|Q9BY77|PDIP3_HUMAN;tr|Q8WUT1|Q8WUT1_HUMAN;tr|F8WCX5|F8WCX5_HUMAN;tr|Q6R954|Q6R954_HUMAN;tr|F8WEE2|F8WEE2_HUMAN	1.53943	0.796205	1.00295	1	0.904978	1243900	1886700	2206800	1	1627000	1914900	1502200	2213300	1	1472400	6;6;5;5;3;3	6;6;5;5;3;3	6;6;5;5;3;3	tr|F6VRR5|F6VRR5_HUMAN Polymerase delta-interacting protein 3 OS=Homo sapiens GN=POLDIP3 PE=1 SV=1;sp|Q9BY77|PDIP3_HUMAN Polymerase delta-interacting protein 3 OS=Homo sapiens GN=POLDIP3 PE=1 SV=2;tr|Q8WUT1|Q8WUT1_HUMAN POLDIP3 protein OS=Homo sapiens GN=P	6	6	6	6	2	4	3	0	3	4	4	3	0	4	2	4	3	0	3	4	4	3	0	4	2	4	3	0	3
sp|O00566|MPP10_HUMAN;tr|U3KQ48|U3KQ48_HUMAN	sp|O00566|MPP10_HUMAN	1.53851	3153700	2804300	1	1.38703	2828000	1	1	1	2818100	4350900	3153700	2804300	1	3908800	10;4	10;4	10;4	sp|O00566|MPP10_HUMAN U3 small nucleolar ribonucleoprotein protein MPP10 OS=Homo sapiens GN=MPHOSPH10 PE=1 SV=2	2	10	10	10	2	1	2	0	3	4	4	4	1	6	2	1	2	0	3	4	4	4	1	6	2	1	2	0	3
sp|Q13243|SRSF5_HUMAN;tr|B4DJK0|B4DJK0_HUMAN;tr|B4DUA4|B4DUA4_HUMAN;tr|G3V5K8|G3V5K8_HUMAN	sp|Q13243|SRSF5_HUMAN	1.53273	2646200	1.17912	1.57267	1	1964600	1	2134900	1373400	1	3011200	2646200	2517300	2159900	1	5;2;2;1	4;1;1;1	4;1;1;1	sp|Q13243|SRSF5_HUMAN Serine/arginine-rich splicing factor 5 OS=Homo sapiens GN=SRSF5 PE=1 SV=1	4	5	4	4	2	2	3	3	2	2	3	2	3	2	2	1	3	2	2	2	2	2	2	1	2	1	3	2	2
sp|Q13610|PWP1_HUMAN;tr|B4DJV5|B4DJV5_HUMAN;tr|F8VZ56|F8VZ56_HUMAN	sp|Q13610|PWP1_HUMAN;tr|B4DJV5|B4DJV5_HUMAN	1.32291	1.73307	1.54055	1.18858	1.26784	4158100	5280500	5598000	3850400	6314600	5500800	9151500	8624000	4576500	8005900	8;7;1	8;7;1	8;7;1	sp|Q13610|PWP1_HUMAN Periodic tryptophan protein 1 homolog OS=Homo sapiens GN=PWP1 PE=1 SV=1;tr|B4DJV5|B4DJV5_HUMAN Periodic tryptophan protein 1 homolog OS=Homo sapiens GN=PWP1 PE=1 SV=1	3	8	8	8	2	5	1	2	6	4	6	5	3	3	2	5	1	2	6	4	6	5	3	3	2	5	1	2	6
sp|Q9BSC4|NOL10_HUMAN;tr|H7C1Z3|H7C1Z3_HUMAN	sp|Q9BSC4|NOL10_HUMAN	1.52924	0.772434	1.44085	1	1.16239	2409300	3410000	1976400	1	3018600	3684400	2634000	2847700	1	3508800	10;1	10;1	10;1	sp|Q9BSC4|NOL10_HUMAN Nucleolar protein 10 OS=Homo sapiens GN=NOL10 PE=1 SV=1	2	10	10	10	4	7	3	0	3	4	5	4	1	4	4	7	3	0	3	4	5	4	1	4	4	7	3	0	3
sp|P67809|YBOX1_HUMAN;tr|A0A087X1S2|A0A087X1S2_HUMAN;tr|H0Y449|H0Y449_HUMAN;tr|C9J5V9|C9J5V9_HUMAN;sp|Q9Y2T7|YBOX2_HUMAN	sp|P67809|YBOX1_HUMAN;tr|A0A087X1S2|A0A087X1S2_HUMAN;tr|H0Y449|H0Y449_HUMAN	1.52759	0.98264	0.693777	1.11183	0.865354	40816000	50690000	54026000	44691000	54142000	62350000	49810000	37482000	49689000	46852000	15;13;12;6;4	15;13;12;6;4	9;7;9;5;0	sp|P67809|YBOX1_HUMAN Nuclease-sensitive element-binding protein 1 OS=Homo sapiens GN=YBX1 PE=1 SV=3;tr|A0A087X1S2|A0A087X1S2_HUMAN Nuclease-sensitive element-binding protein 1 OS=Homo sapiens GN=YBX1 PE=1 SV=2;tr|H0Y449|H0Y449_HUMAN Nuclease-sensitive ele	5	15	15	9	12	11	11	11	13	12	13	9	9	14	12	11	11	11	13	12	13	9	9	14	7	8	8	7	8
sp|Q9P0M6|H2AW_HUMAN;tr|Q5SQT3|Q5SQT3_HUMAN	sp|Q9P0M6|H2AW_HUMAN	1.49644	2446800	1.10166	1	1.49473	2516900	1	2685300	1	1964900	3766400	2446800	2958300	1	2937000	9;4	7;3	7;3	sp|Q9P0M6|H2AW_HUMAN Core histone macro-H2A.2 OS=Homo sapiens GN=H2AFY2 PE=1 SV=3	2	9	7	7	3	3	4	2	4	6	3	3	2	4	2	2	2	1	3	5	3	3	1	3	2	2	2	1	3
sp|P62805|H4_HUMAN	sp|P62805|H4_HUMAN	1.45473	0.624087	1.12482	1.18796	1.3388	327780000	387270000	298840000	459990000	336130000	476830000	241690000	336140000	546450000	450010000	10	10	10	sp|P62805|H4_HUMAN Histone H4 OS=Homo sapiens GN=HIST1H4A PE=1 SV=2	1	10	10	10	7	8	6	8	8	7	9	7	6	8	7	8	6	8	8	7	9	7	6	8	7	8	6	8	8
sp|Q15149|PLEC_HUMAN;tr|E9PMV1|E9PMV1_HUMAN;tr|E9PKG0|E9PKG0_HUMAN;tr|E9PIA2|E9PIA2_HUMAN;tr|E9PQ28|E9PQ28_HUMAN;tr|H0YDN1|H0YDN1_HUMAN;sp|A1Z1Q3|MACD2_HUMAN;tr|H3BLW6|H3BLW6_HUMAN;tr|J3KNG8|J3KNG8_HUMAN	sp|Q15149|PLEC_HUMAN	1.74391	1.42018	1.5785	0.754526	1.35745	24784000	39305000	29485000	16405000	28471000	43221000	55820000	46542000	12378000	38648000	86;18;6;3;3;2;1;1;1	86;18;6;3;3;2;1;1;1	82;18;6;3;3;2;1;1;1	sp|Q15149|PLEC_HUMAN Plectin OS=Homo sapiens GN=PLEC PE=1 SV=3	9	86	86	82	26	45	31	12	28	47	56	33	9	37	26	45	31	12	28	47	56	33	9	37	26	44	31	12	26
sp|Q9H8H0|NOL11_HUMAN;tr|J3QR28|J3QR28_HUMAN;tr|J3QLQ6|J3QLQ6_HUMAN	sp|Q9H8H0|NOL11_HUMAN;tr|J3QR28|J3QR28_HUMAN	1.09489	4797000	1.53814	1.07663	1.25362	7043800	1	3770400	5046300	7551800	7712200	4797000	5799400	5433000	9467100	17;9;5	17;9;5	16;9;5	sp|Q9H8H0|NOL11_HUMAN Nucleolar protein 11 OS=Homo sapiens GN=NOL11 PE=1 SV=1;tr|J3QR28|J3QR28_HUMAN Nucleolar protein 11 (Fragment) OS=Homo sapiens GN=NOL11 PE=1 SV=1	3	17	17	16	7	2	4	3	6	5	6	5	3	9	7	2	4	3	6	5	6	5	3	9	6	2	4	3	6
sp|Q9BYG3|MK67I_HUMAN;tr|C9J808|C9J808_HUMAN;tr|C9J6C5|C9J6C5_HUMAN;tr|H7BZL0|H7BZL0_HUMAN	sp|Q9BYG3|MK67I_HUMAN	1.56843	1.0975	1.51036	1.06454	1.71454	13613000	10431000	10667000	14673000	16055000	21351000	11448000	16111000	15620000	27527000	13;6;6;4	13;6;6;4	13;6;6;4	sp|Q9BYG3|MK67I_HUMAN MKI67 FHA domain-interacting nucleolar phosphoprotein OS=Homo sapiens GN=NIFK PE=1 SV=1	4	13	13	13	10	6	8	8	10	9	10	8	6	9	10	6	8	8	10	9	10	8	6	9	10	6	8	8	10
sp|P52292|IMA1_HUMAN;tr|J3QLL0|J3QLL0_HUMAN;tr|J3KS65|J3KS65_HUMAN	sp|P52292|IMA1_HUMAN;tr|J3QLL0|J3QLL0_HUMAN;tr|J3KS65|J3KS65_HUMAN	1.44508	0.632397	0.801833	0.650099	0.93762	3427700	8302700	5926300	7675600	4257800	4953300	5250600	4751900	4989900	3992200	10;5;5	10;5;5	10;5;5	sp|P52292|IMA1_HUMAN Importin subunit alpha-1 OS=Homo sapiens GN=KPNA2 PE=1 SV=1;tr|J3QLL0|J3QLL0_HUMAN Importin subunit alpha-1 (Fragment) OS=Homo sapiens GN=KPNA2 PE=1 SV=1;tr|J3KS65|J3KS65_HUMAN Importin subunit alpha-1 (Fragment) OS=Homo sapiens GN=KPN	3	10	10	10	4	3	6	3	4	2	5	5	4	5	4	3	6	3	4	2	5	5	4	5	4	3	6	3	4
sp|O15269|SPTC1_HUMAN;tr|A0A0D9SER6|A0A0D9SER6_HUMAN;tr|A0A0D9SG83|A0A0D9SG83_HUMAN;tr|A0A0G2JNM9|A0A0G2JNM9_HUMAN	sp|O15269|SPTC1_HUMAN;tr|A0A0D9SER6|A0A0D9SER6_HUMAN	1.22547	1.67764	1.46081	1.24566	1.33111	29237000	28434000	25236000	12603000	25937000	35829000	47702000	36865000	15699000	34525000	84;80;5;2	84;80;5;2	2;1;0;0	sp|O15269|SPTC1_HUMAN Serine palmitoyltransferase 1 OS=Homo sapiens GN=SPTLC1 PE=1 SV=1;tr|A0A0D9SER6|A0A0D9SER6_HUMAN Zinc finger protein 630 (Fragment) OS=Homo sapiens GN=ZNF630 PE=4 SV=1	4	84	84	2	36	37	31	11	22	41	56	32	11	42	36	37	31	11	22	41	56	32	11	42	1	1	1	0	1
sp|Q8NHX4|SPTA3_HUMAN;tr|A0A087WWT4|A0A087WWT4_HUMAN;tr|F8WBR8|F8WBR8_HUMAN;tr|A4QPE4|A4QPE4_HUMAN	sp|Q8NHX4|SPTA3_HUMAN;tr|A0A087WWT4|A0A087WWT4_HUMAN	1.17732	1.83263	1.431	1.12255	1.307	23568000	19084000	18262000	8872300	18609000	27747000	34974000	26133000	9959600	24322000	64;63;17;2	61;60;15;0	61;60;15;0	sp|Q8NHX4|SPTA3_HUMAN Spermatogenesis-associated protein 3 OS=Homo sapiens GN=SPATA3 PE=2 SV=2;tr|A0A087WWT4|A0A087WWT4_HUMAN Tetraspanin OS=Homo sapiens GN=TSPAN10 PE=1 SV=1	4	64	61	61	32	22	30	9	26	29	44	29	10	35	31	19	28	9	25	27	41	29	10	32	31	19	28	9	25
sp|P62258|1433E_HUMAN;tr|B4DJF2|B4DJF2_HUMAN;tr|I3L3T1|I3L3T1_HUMAN;tr|K7EM20|K7EM20_HUMAN;tr|I3L0W5|I3L0W5_HUMAN	sp|P62258|1433E_HUMAN;tr|B4DJF2|B4DJF2_HUMAN;tr|I3L3T1|I3L3T1_HUMAN;tr|K7EM20|K7EM20_HUMAN	1.41656	1568400	1855600	1	1	1289600	1	1	1	1	1826800	1568400	1855600	1	1	4;2;2;2;1	4;2;2;2;1	2;1;1;1;1	sp|P62258|1433E_HUMAN 14-3-3 protein epsilon OS=Homo sapiens GN=YWHAE PE=1 SV=1;tr|B4DJF2|B4DJF2_HUMAN 14-3-3 protein epsilon OS=Homo sapiens GN=YWHAE PE=1 SV=1;tr|I3L3T1|I3L3T1_HUMAN 14-3-3 protein epsilon OS=Homo sapiens GN=YWHAE PE=1 SV=1;tr|K7EM20|K7EM	5	4	4	2	2	1	2	0	0	3	3	2	0	2	2	1	2	0	0	3	3	2	0	2	0	0	1	0	0
tr|A0A087X2D0|A0A087X2D0_HUMAN;sp|P84103|SRSF3_HUMAN	tr|A0A087X2D0|A0A087X2D0_HUMAN;sp|P84103|SRSF3_HUMAN	1.40505	1.06177	0.963405	1	1.10507	4085400	4456700	5399600	1	3303600	5740200	4732000	5202000	1	3650700	4;4	3;3	3;3	tr|A0A087X2D0|A0A087X2D0_HUMAN Serine/arginine-rich-splicing factor 3 OS=Homo sapiens GN=SRSF3 PE=1 SV=1;sp|P84103|SRSF3_HUMAN Serine/arginine-rich splicing factor 3 OS=Homo sapiens GN=SRSF3 PE=1 SV=1	2	4	3	3	3	3	3	2	4	4	3	3	2	4	2	2	2	1	3	3	2	2	1	3	2	2	2	1	3
tr|A0A087WV05|A0A087WV05_HUMAN;sp|Q99417|MYCBP_HUMAN;tr|A0A0D9SEI7|A0A0D9SEI7_HUMAN	tr|A0A087WV05|A0A087WV05_HUMAN;sp|Q99417|MYCBP_HUMAN	1754100	0.768116	1504800	0.957311	1.41259	1	3078700	1	3579400	1651500	1754100	2364800	1504800	3426600	2332900	5;5;1	5;5;1	5;5;1	tr|A0A087WV05|A0A087WV05_HUMAN Uncharacterized protein OS=Homo sapiens PE=4 SV=1;sp|Q99417|MYCBP_HUMAN C-Myc-binding protein OS=Homo sapiens GN=MYCBP PE=1 SV=3	3	5	5	5	1	4	1	2	2	2	4	2	2	4	1	4	1	2	2	2	4	2	2	4	1	4	1	2	2
sp|O60832|DKC1_HUMAN;tr|C9IYT0|C9IYT0_HUMAN;tr|H7C0M1|H7C0M1_HUMAN;tr|H7C2Q9|H7C2Q9_HUMAN;tr|H7C2Q2|H7C2Q2_HUMAN;tr|H7BZF2|H7BZF2_HUMAN	sp|O60832|DKC1_HUMAN;tr|C9IYT0|C9IYT0_HUMAN;tr|H7C0M1|H7C0M1_HUMAN	1.40207	0.93789	0.665896	1.36098	1.12892	15256000	16519000	20335000	8923000	16344000	21390000	15493000	13541000	12144000	18451000	18;11;9;5;5;4	18;11;9;5;5;4	18;11;9;5;5;4	sp|O60832|DKC1_HUMAN H/ACA ribonucleoprotein complex subunit 4 OS=Homo sapiens GN=DKC1 PE=1 SV=3;tr|C9IYT0|C9IYT0_HUMAN H/ACA ribonucleoprotein complex subunit 4 (Fragment) OS=Homo sapiens GN=DKC1 PE=1 SV=5;tr|H7C0M1|H7C0M1_HUMAN H/ACA ribonucleoprotein co	6	18	18	18	9	10	12	4	10	8	9	8	6	11	9	10	12	4	10	8	9	8	6	11	9	10	12	4	10
sp|Q9Y221|NIP7_HUMAN;tr|J3QLW7|J3QLW7_HUMAN;tr|J3QRD6|J3QRD6_HUMAN;tr|J3QRR4|J3QRR4_HUMAN	sp|Q9Y221|NIP7_HUMAN;tr|J3QLW7|J3QLW7_HUMAN	1.44898	1.1343	1.26028	0.818311	1.92045	11143000	13984000	15633000	7667500	14179000	16146000	15862000	19702000	6274400	27230000	8;5;2;2	8;5;2;2	8;5;2;2	sp|Q9Y221|NIP7_HUMAN 60S ribosome subunit biogenesis protein NIP7 homolog OS=Homo sapiens GN=NIP7 PE=1 SV=1;tr|J3QLW7|J3QLW7_HUMAN 60S ribosome subunit biogenesis protein NIP7 homolog OS=Homo sapiens GN=NIP7 PE=1 SV=1	4	8	8	8	5	5	5	1	4	4	5	3	2	6	5	5	5	1	4	4	5	3	2	6	5	5	5	1	4
sp|O95478|NSA2_HUMAN;tr|A0A0A0MQZ6|A0A0A0MQZ6_HUMAN;tr|H0YAI9|H0YAI9_HUMAN	sp|O95478|NSA2_HUMAN	1.54589	0.915195	1.04792	1.43308	1.62222	11255000	10931000	8839900	8012100	12523000	17399000	10004000	9263500	11482000	20315000	14;4;2	14;4;2	14;4;2	sp|O95478|NSA2_HUMAN Ribosome biogenesis protein NSA2 homolog OS=Homo sapiens GN=NSA2 PE=1 SV=1	3	14	14	14	5	3	8	2	6	5	5	6	2	7	5	3	8	2	6	5	5	6	2	7	5	3	8	2	6
sp|Q9UKD2|MRT4_HUMAN	sp|Q9UKD2|MRT4_HUMAN	1.31552	1.38638	1.18851	1.22055	1.46895	49800000	44218000	44299000	40295000	51624000	65513000	61303000	52650000	49182000	75833000	16	16	16	sp|Q9UKD2|MRT4_HUMAN mRNA turnover protein 4 homolog OS=Homo sapiens GN=MRTO4 PE=1 SV=2	1	16	16	16	12	12	11	9	12	11	11	12	8	12	12	12	11	9	12	11	11	12	8	12	12	12	11	9	12
sp|Q9BVJ6|UT14A_HUMAN;tr|X6RJY0|X6RJY0_HUMAN	sp|Q9BVJ6|UT14A_HUMAN	1.33073	0.92895	1.18614	1.77518	1.60629	10247000	11696000	11588000	7083800	9424200	13636000	10865000	13745000	12575000	15138000	25;7	25;7	18;5	sp|Q9BVJ6|UT14A_HUMAN U3 small nucleolar RNA-associated protein 14 homolog A OS=Homo sapiens GN=UTP14A PE=1 SV=1	2	25	25	18	12	13	11	4	11	13	17	12	8	12	12	13	11	4	11	13	17	12	8	12	8	9	7	2	9
sp|Q9Y2H1|ST38L_HUMAN;tr|F5H277|F5H277_HUMAN;tr|F5GY51|F5GY51_HUMAN;tr|F5H7Z3|F5H7Z3_HUMAN;tr|I3L0D0|I3L0D0_HUMAN;tr|F5H5E6|F5H5E6_HUMAN;tr|F5H0V1|F5H0V1_HUMAN;tr|H0YGN4|H0YGN4_HUMAN	sp|Q9Y2H1|ST38L_HUMAN	1.26501	1.62713	1.11502	0.90003	1.46322	4882800	8077400	5869400	4690400	4078000	6176800	13143000	6544500	4221500	5967000	16;6;5;4;4;1;1;1	14;5;4;3;3;1;1;1	14;5;4;3;3;1;1;1	sp|Q9Y2H1|ST38L_HUMAN Serine/threonine-protein kinase 38-like OS=Homo sapiens GN=STK38L PE=1 SV=3	8	16	14	14	4	9	10	4	4	8	11	9	2	5	3	8	9	3	3	8	10	8	2	3	3	8	9	3	3
sp|Q8IWL1|SFPA2_HUMAN;tr|H0YM97|H0YM97_HUMAN;tr|H0YM91|H0YM91_HUMAN;sp|Q9UPN6|SCAF8_HUMAN;tr|A0A0A0MT33|A0A0A0MT33_HUMAN	sp|Q8IWL1|SFPA2_HUMAN	1.83904	1.1205	1.12583	1.35529	1.15365	18725000	17876000	23087000	15894000	22707000	34436000	20030000	25992000	21541000	26196000	18;5;1;1;1	18;5;1;1;1	17;5;1;1;1	sp|Q8IWL1|SFPA2_HUMAN Pulmonary surfactant-associated protein A2 OS=Homo sapiens GN=SFTPA2 PE=1 SV=1	5	18	18	17	13	8	11	5	8	8	9	7	7	8	13	8	11	5	8	8	9	7	7	8	12	8	10	5	7
tr|A0A0D9SG12|A0A0D9SG12_HUMAN;tr|A0A0D9SFB3|A0A0D9SFB3_HUMAN;sp|O00571|DDX3X_HUMAN;tr|A0A0D9SF53|A0A0D9SF53_HUMAN;sp|O15523|DDX3Y_HUMAN;tr|A0A087WVZ1|A0A087WVZ1_HUMAN;tr|B4DLA0|B4DLA0_HUMAN;tr|C9J8G5|C9J8G5_HUMAN;tr|C9J081|C9J081_HUMAN;tr|A0A087WX09|A0A087WX09_HUMAN;sp|O95232|LC7L3_HUMAN;tr|D6RHH0|D6RHH0_HUMAN;tr|U3KQT3|U3KQT3_HUMAN;tr|D6RDI2|D6RDI2_HUMAN;tr|D6RCM4|D6RCM4_HUMAN;sp|Q9NQI0|DDX4_HU…	tr|A0A0D9SG12|A0A0D9SG12_HUMAN;tr|A0A0D9SFB3|A0A0D9SFB3_HUMAN;sp|O00571|DDX3X_HUMAN;tr|A0A0D9SF53|A0A0D9SF53_HUMAN;sp|O15523|DDX3Y_HUMAN	1.37644	1.07075	0.940788	0.522439	1.13274	13912000	19506000	20891000	17848000	16996000	19149000	20886000	19654000	9324500	19252000	23;21;21;21;13;3;3;3;3;2;2;1;1;1;1;1	22;20;20;20;12;3;3;3;3;2;2;1;1;1;1;1	22;20;20;20;12;3;3;3;3;2;2;1;1;1;1;1	tr|A0A0D9SG12|A0A0D9SG12_HUMAN ATP-dependent RNA helicase DDX3X OS=Homo sapiens GN=DDX3X PE=1 SV=1;tr|A0A0D9SFB3|A0A0D9SFB3_HUMAN ATP-dependent RNA helicase DDX3X OS=Homo sapiens GN=DDX3X PE=1 SV=1;sp|O00571|DDX3X_HUMAN ATP-dependent RNA helicase DDX3X OS=	16	23	22	22	9	11	13	7	10	15	13	13	5	11	8	10	12	6	9	14	12	12	4	10	8	10	12	6	9
sp|Q9Y5B9|SP16H_HUMAN;tr|G3V5A4|G3V5A4_HUMAN;tr|G3V401|G3V401_HUMAN;tr|G3V2X0|G3V2X0_HUMAN	sp|Q9Y5B9|SP16H_HUMAN	1.37449	1.19711	1.49831	1	0.979201	1657200	1479400	974900	1	1399100	2277800	1771000	1460700	1	1370000	7;1;1;1	7;1;1;1	7;1;1;1	sp|Q9Y5B9|SP16H_HUMAN FACT complex subunit SPT16 OS=Homo sapiens GN=SUPT16H PE=1 SV=1	4	7	7	7	4	2	2	0	2	5	3	2	1	3	4	2	2	0	2	5	3	2	1	3	4	2	2	0	2
sp|P56182|RRP1_HUMAN;tr|D6RE82|D6RE82_HUMAN	sp|P56182|RRP1_HUMAN	1.65728	1.02884	1.1471	1.33772	1.32719	9146300	9184400	8830100	10041000	11495000	15158000	9449300	10129000	13432000	15256000	15;2	15;2	15;2	sp|P56182|RRP1_HUMAN Ribosomal RNA processing protein 1 homolog A OS=Homo sapiens GN=RRP1 PE=1 SV=1	2	15	15	15	6	6	7	6	6	10	8	7	7	12	6	6	7	6	6	10	8	7	7	12	6	6	7	6	6
tr|F8VYE8|F8VYE8_HUMAN;sp|P36873|PP1G_HUMAN;tr|F8VR82|F8VR82_HUMAN;tr|F8W0W8|F8W0W8_HUMAN;tr|A0A087WYY5|A0A087WYY5_HUMAN;tr|E7ETD8|E7ETD8_HUMAN;tr|H0Y3Y6|H0Y3Y6_HUMAN;tr|F5H1L6|F5H1L6_HUMAN;tr|F5H037|F5H037_HUMAN;tr|F8WE71|F8WE71_HUMAN	tr|F8VYE8|F8VYE8_HUMAN;sp|P36873|PP1G_HUMAN;tr|F8VR82|F8VR82_HUMAN;tr|F8W0W8|F8W0W8_HUMAN;tr|A0A087WYY5|A0A087WYY5_HUMAN;tr|E7ETD8|E7ETD8_HUMAN	1.36758	0.664391	1.61174	1	0.97362	3986600	6768000	4438000	1	3741400	5452000	4496600	7152900	1	3642700	7;7;6;6;5;4;1;1;1;1	7;7;6;6;5;4;1;1;1;1	2;2;2;1;2;0;0;0;0;0	tr|F8VYE8|F8VYE8_HUMAN Serine/threonine-protein phosphatase OS=Homo sapiens GN=PPP1CC PE=1 SV=1;sp|P36873|PP1G_HUMAN Serine/threonine-protein phosphatase PP1-gamma catalytic subunit OS=Homo sapiens GN=PPP1CC PE=1 SV=1;tr|F8VR82|F8VR82_HUMAN Serine/threonin	10	7	7	2	4	4	4	1	3	5	5	4	0	4	4	4	4	1	3	5	5	4	0	4	2	2	1	0	1
sp|Q9Y3B4|SF3B6_HUMAN	sp|Q9Y3B4|SF3B6_HUMAN	0.935377	0.940263	1.11182	3056700	0.963745	1908000	2814000	2586300	1	2750000	1784700	2645900	2875500	3056700	2650300	3	3	3	sp|Q9Y3B4|SF3B6_HUMAN Splicing factor 3B subunit 6 OS=Homo sapiens GN=SF3B6 PE=1 SV=1	1	3	3	3	3	2	2	1	3	3	3	2	2	2	3	2	2	1	3	3	3	2	2	2	3	2	2	1	3
sp|Q9BZE4|NOG1_HUMAN;tr|Q5T3R7|Q5T3R7_HUMAN	sp|Q9BZE4|NOG1_HUMAN	1.56815	1.17503	1.32031	0.928362	1.54374	112840000	98789000	102620000	142940000	118990000	176950000	116080000	135490000	132700000	183690000	37;7	37;7	37;7	sp|Q9BZE4|NOG1_HUMAN Nucleolar GTP-binding protein 1 OS=Homo sapiens GN=GTPBP4 PE=1 SV=3	2	37	37	37	22	22	24	17	20	27	21	19	15	28	22	22	24	17	20	27	21	19	15	28	22	22	24	17	20
sp|Q9H583|HEAT1_HUMAN;tr|Q5T3Q7|Q5T3Q7_HUMAN;tr|Q6P664|Q6P664_HUMAN	sp|Q9H583|HEAT1_HUMAN;tr|Q5T3Q7|Q5T3Q7_HUMAN	1.14572	0.999589	1.35471	2.2068	1.35065	13327000	6318700	7262800	2286700	13167000	15269000	6316100	9839000	5046300	17784000	32;31;3	32;31;3	32;31;3	sp|Q9H583|HEAT1_HUMAN HEAT repeat-containing protein 1 OS=Homo sapiens GN=HEATR1 PE=1 SV=3;tr|Q5T3Q7|Q5T3Q7_HUMAN HEAT repeat-containing protein 1 OS=Homo sapiens GN=HEATR1 PE=1 SV=1	3	32	32	32	17	9	13	2	13	19	10	10	5	21	17	9	13	2	13	19	10	10	5	21	17	9	13	2	13
sp|O75691|UTP20_HUMAN	sp|O75691|UTP20_HUMAN	1.12646	1.27269	0.994463	2209900	1.35197	8999000	4963500	4839900	1	6864600	10137000	6317000	4813100	2209900	9280700	29	29	29	sp|O75691|UTP20_HUMAN Small subunit processome component 20 homolog OS=Homo sapiens GN=UTP20 PE=1 SV=3	1	29	29	29	13	9	10	0	7	15	10	7	2	15	13	9	10	0	7	15	10	7	2	15	13	9	10	0	7
tr|B4DXZ6|B4DXZ6_HUMAN;sp|P51114|FXR1_HUMAN;tr|E7EU85|E7EU85_HUMAN;tr|E9PFF5|E9PFF5_HUMAN;tr|C9JY20|C9JY20_HUMAN;tr|C9JZE0|C9JZE0_HUMAN;tr|C9JAJ4|C9JAJ4_HUMAN;tr|C9IZ22|C9IZ22_HUMAN;tr|H7C4S4|H7C4S4_HUMAN;tr|C9J5B4|C9J5B4_HUMAN	tr|B4DXZ6|B4DXZ6_HUMAN;sp|P51114|FXR1_HUMAN;tr|E7EU85|E7EU85_HUMAN;tr|E9PFF5|E9PFF5_HUMAN	1.44771	1.43504	1.04551	1.14736	1.2719	11961000	8544000	11777000	6846500	10353000	17316000	12261000	12313000	7855400	13168000	17;17;14;14;4;4;3;2;2;1	17;17;14;14;4;4;3;2;2;1	15;15;12;12;4;4;3;2;2;1	tr|B4DXZ6|B4DXZ6_HUMAN Fragile X mental retardation syndrome-related protein 1 OS=Homo sapiens GN=FXR1 PE=1 SV=1;sp|P51114|FXR1_HUMAN Fragile X mental retardation syndrome-related protein 1 OS=Homo sapiens GN=FXR1 PE=1 SV=3;tr|E7EU85|E7EU85_HUMAN Fragile X	10	17	17	15	6	7	9	3	7	14	12	5	4	8	6	7	9	3	7	14	12	5	4	8	5	7	8	2	5
sp|Q07020|RL18_HUMAN;tr|J3QQ67|J3QQ67_HUMAN;tr|G3V203|G3V203_HUMAN;tr|H0YHA7|H0YHA7_HUMAN;tr|F8VYV2|F8VYV2_HUMAN;tr|F8VUA6|F8VUA6_HUMAN;tr|A0A075B7A0|A0A075B7A0_HUMAN;tr|F8VXR6|F8VXR6_HUMAN	sp|Q07020|RL18_HUMAN;tr|J3QQ67|J3QQ67_HUMAN;tr|G3V203|G3V203_HUMAN;tr|H0YHA7|H0YHA7_HUMAN;tr|F8VYV2|F8VYV2_HUMAN;tr|F8VUA6|F8VUA6_HUMAN;tr|A0A075B7A0|A0A075B7A0_HUMAN	1.34077	0.947524	0.369477	0.776826	1.37907	560410000	661440000	501330000	548900000	365840000	751380000	626730000	185230000	426400000	504520000	11;11;10;10;9;8;7;1	11;11;10;10;9;8;7;1	11;11;10;10;9;8;7;1	sp|Q07020|RL18_HUMAN 60S ribosomal protein L18 OS=Homo sapiens GN=RPL18 PE=1 SV=2;tr|J3QQ67|J3QQ67_HUMAN 60S ribosomal protein L18 (Fragment) OS=Homo sapiens GN=RPL18 PE=1 SV=1;tr|G3V203|G3V203_HUMAN 60S ribosomal protein L18 OS=Homo sapiens GN=RPL18 PE=1	8	11	11	11	7	6	7	9	8	7	6	5	6	6	7	6	7	9	8	7	6	5	6	6	7	6	7	9	8
sp|Q9H7B2|RPF2_HUMAN;tr|Q5VXN0|Q5VXN0_HUMAN;tr|U3KQN5|U3KQN5_HUMAN;tr|Q5VXM9|Q5VXM9_HUMAN	sp|Q9H7B2|RPF2_HUMAN;tr|Q5VXN0|Q5VXN0_HUMAN	1.69509	1.1479	1.12579	1.01028	1.40317	38917000	43009000	40821000	49051000	48263000	65968000	49370000	45956000	49555000	67721000	14;12;1;1	14;12;1;1	14;12;1;1	sp|Q9H7B2|RPF2_HUMAN Ribosome production factor 2 homolog OS=Homo sapiens GN=RPF2 PE=1 SV=2;tr|Q5VXN0|Q5VXN0_HUMAN Ribosome production factor 2 homolog (Fragment) OS=Homo sapiens GN=RPF2 PE=1 SV=1	4	14	14	14	10	11	11	8	8	10	10	11	10	10	10	11	11	8	8	10	10	11	10	10	10	11	11	8	8
sp|O00139|KIF2A_HUMAN;tr|D6R9M0|D6R9M0_HUMAN;tr|H0Y8H2|H0Y8H2_HUMAN	sp|O00139|KIF2A_HUMAN	0.935084	1.31136	1.13412	2306700	1.1234	4578200	3494700	3788400	1	3671000	4281000	4582800	4296500	2306700	4124000	12;3;2	12;3;2	12;3;2	sp|O00139|KIF2A_HUMAN Kinesin-like protein KIF2A OS=Homo sapiens GN=KIF2A PE=1 SV=3	3	12	12	12	7	7	4	0	2	8	7	5	2	4	7	7	4	0	2	8	7	5	2	4	7	7	4	0	2
sp|Q9UNX4|WDR3_HUMAN;tr|Q6PDA5|Q6PDA5_HUMAN	sp|Q9UNX4|WDR3_HUMAN	1.33349	1.08845	1806900	1	2.84272	2833700	2125400	1	1	1358100	3778700	2313400	1806900	1	3860700	11;1	11;1	11;1	sp|Q9UNX4|WDR3_HUMAN WD repeat-containing protein 3 OS=Homo sapiens GN=WDR3 PE=1 SV=1	2	11	11	11	3	4	2	0	2	6	4	3	0	7	3	4	2	0	2	6	4	3	0	7	3	4	2	0	2
sp|Q15233|NONO_HUMAN;tr|H7C367|H7C367_HUMAN;tr|C9JYS8|C9JYS8_HUMAN;tr|C9IZL7|C9IZL7_HUMAN;tr|C9J4X2|C9J4X2_HUMAN	sp|Q15233|NONO_HUMAN;tr|H7C367|H7C367_HUMAN;tr|C9JYS8|C9JYS8_HUMAN	0.818511	1.71589	1.30943	1.69317	1.31095	13819000	5387300	11088000	5637000	7315700	11311000	9244000	14519000	9544400	9590500	16;10;8;6;2	15;9;8;5;2	14;8;8;5;2	sp|Q15233|NONO_HUMAN Non-POU domain-containing octamer-binding protein OS=Homo sapiens GN=NONO PE=1 SV=4;tr|H7C367|H7C367_HUMAN Non-POU domain-containing octamer-binding protein (Fragment) OS=Homo sapiens GN=NONO PE=1 SV=5;tr|C9JYS8|C9JYS8_HUMAN Non-POU do	5	16	15	14	9	6	10	3	7	9	8	8	4	7	8	6	9	3	6	9	7	8	4	7	7	6	9	3	6
tr|A0A087WX29|A0A087WX29_HUMAN;sp|Q13148|TADBP_HUMAN;tr|E7EPY2|E7EPY2_HUMAN;tr|A0A087WYY0|A0A087WYY0_HUMAN;tr|A0A087X260|A0A087X260_HUMAN;tr|B1AKP7|B1AKP7_HUMAN;tr|A0A087WV68|A0A087WV68_HUMAN;tr|A0A087WXQ5|A0A087WXQ5_HUMAN;tr|K7EJM5|K7EJM5_HUMAN;tr|K7EN94|K7EN94_HUMAN;tr|A0A087WXV3|A0A087WXV3_HUMAN;tr|A0A087WX67|A0A087WX67_HUMAN;tr|A0A087WW61|A0A087WW61_HUMAN;tr|A0A087WYE7|A0A087WYE7_HUMAN;tr|A0A…	tr|A0A087WX29|A0A087WX29_HUMAN;sp|Q13148|TADBP_HUMAN;tr|E7EPY2|E7EPY2_HUMAN;tr|A0A087WYY0|A0A087WYY0_HUMAN;tr|A0A087X260|A0A087X260_HUMAN;tr|B1AKP7|B1AKP7_HUMAN;tr|A0A087WV68|A0A087WV68_HUMAN;tr|A0A087WXQ5|A0A087WXQ5_HUMAN;tr|K7EJM5|K7EJM5_HUMAN;tr|K7EN94|K7EN94_HUMAN;tr|A0A087WXV3|A0A087WXV3_HUMAN;tr|A0A087WX67|A0A087WX67_HUMAN;tr|A0A087WW61|A0A087WW61_HUMAN	1.32359	1.10076	1.19799	3.92711e-07	1.2428	2193800	1455900	2055200	2546400	2298200	2903700	1602600	2462100	1	2856200	4;4;3;3;3;3;3;3;2;2;2;2;2;1;1;1;1	4;4;3;3;3;3;3;3;2;2;2;2;2;1;1;1;1	4;4;3;3;3;3;3;3;2;2;2;2;2;1;1;1;1	tr|A0A087WX29|A0A087WX29_HUMAN TAR DNA-binding protein 43 (Fragment) OS=Homo sapiens GN=TARDBP PE=1 SV=1;sp|Q13148|TADBP_HUMAN TAR DNA-binding protein 43 OS=Homo sapiens GN=TARDBP PE=1 SV=1;tr|E7EPY2|E7EPY2_HUMAN MDS1 and EVI1 complex locus protein EVI1 (F	17	4	4	4	3	3	3	2	2	2	3	3	1	3	3	3	3	2	2	2	3	3	1	3	3	3	3	2	2
tr|B5MCF9|B5MCF9_HUMAN;sp|O00541|PESC_HUMAN;tr|B3KXD6|B3KXD6_HUMAN;tr|H7BYY8|H7BYY8_HUMAN;tr|H7C267|H7C267_HUMAN	tr|B5MCF9|B5MCF9_HUMAN;sp|O00541|PESC_HUMAN;tr|B3KXD6|B3KXD6_HUMAN	1.44399	1.08134	1.07177	1.05315	1.51513	37627000	33429000	33902000	36258000	32854000	54333000	36148000	36335000	38185000	49778000	21;21;11;2;2	21;21;11;2;2	21;21;11;2;2	tr|B5MCF9|B5MCF9_HUMAN Pescadillo homolog OS=Homo sapiens GN=PES1 PE=1 SV=1;sp|O00541|PESC_HUMAN Pescadillo homolog OS=Homo sapiens GN=PES1 PE=1 SV=1;tr|B3KXD6|B3KXD6_HUMAN Pescadillo homolog OS=Homo sapiens GN=PES1 PE=1 SV=1	5	21	21	21	18	14	13	11	10	11	15	12	11	15	18	14	13	11	10	11	15	12	11	15	18	14	13	11	10
sp|Q15050|RRS1_HUMAN	sp|Q15050|RRS1_HUMAN	1.16984	1.3978	1.30343	1.07561	1.25826	46933000	31297000	44864000	41464000	45841000	54904000	43747000	58477000	44599000	57680000	19	19	19	sp|Q15050|RRS1_HUMAN Ribosome biogenesis regulatory protein homolog OS=Homo sapiens GN=RRS1 PE=1 SV=2	1	19	19	19	8	7	11	8	13	9	7	9	9	13	8	7	11	8	13	9	7	9	9	13	8	7	11	8	13
sp|P42766|RL35_HUMAN;tr|F2Z388|F2Z388_HUMAN	sp|P42766|RL35_HUMAN;tr|F2Z388|F2Z388_HUMAN	1.31742	0.984002	0.804626	1	1.00212	14889000	17627000	19757000	1	16044000	19615000	17345000	15897000	1	16078000	5;3	5;3	5;3	sp|P42766|RL35_HUMAN 60S ribosomal protein L35 OS=Homo sapiens GN=RPL35 PE=1 SV=2;tr|F2Z388|F2Z388_HUMAN 60S ribosomal protein L35 OS=Homo sapiens GN=RPL35 PE=1 SV=1	2	5	5	5	3	4	5	0	2	4	3	3	1	3	3	4	5	0	2	4	3	3	1	3	3	4	5	0	2
tr|E9PKG1|E9PKG1_HUMAN;sp|Q99873|ANM1_HUMAN;tr|H7C2I1|H7C2I1_HUMAN;tr|E9PQ98|E9PQ98_HUMAN;tr|E9PIX6|E9PIX6_HUMAN;tr|A0A087X1W2|A0A087X1W2_HUMAN;tr|E9PNR9|E9PNR9_HUMAN;tr|H0YDE4|H0YDE4_HUMAN;sp|Q9NR22|ANM8_HUMAN;tr|E9PMZ2|E9PMZ2_HUMAN;tr|E9PMW9|E9PMW9_HUMAN;tr|E9PI83|E9PI83_HUMAN	tr|E9PKG1|E9PKG1_HUMAN;sp|Q99873|ANM1_HUMAN;tr|H7C2I1|H7C2I1_HUMAN;tr|E9PQ98|E9PQ98_HUMAN;tr|E9PIX6|E9PIX6_HUMAN;tr|A0A087X1W2|A0A087X1W2_HUMAN;tr|E9PNR9|E9PNR9_HUMAN;tr|H0YDE4|H0YDE4_HUMAN	1.39746	0.972099	1.19553	1.13614	1.62697	12922000	20537000	9339800	13273000	12015000	18058000	19964000	11166000	15080000	19548000	14;14;14;10;10;9;8;8;2;1;1;1	14;14;14;10;10;9;8;8;2;1;1;1	14;14;14;10;10;9;8;8;2;1;1;1	tr|E9PKG1|E9PKG1_HUMAN Protein arginine N-methyltransferase 1 OS=Homo sapiens GN=PRMT1 PE=1 SV=1;sp|Q99873|ANM1_HUMAN Protein arginine N-methyltransferase 1 OS=Homo sapiens GN=PRMT1 PE=1 SV=2;tr|H7C2I1|H7C2I1_HUMAN Protein arginine N-methyltransferase 1 OS	12	14	14	14	10	10	8	4	6	8	12	8	4	9	10	10	8	4	6	8	12	8	4	9	10	10	8	4	6
sp|P46087|NOP2_HUMAN;tr|A0A087WV73|A0A087WV73_HUMAN;tr|F5GWB7|F5GWB7_HUMAN;tr|F5H5X6|F5H5X6_HUMAN;tr|F5H709|F5H709_HUMAN;tr|F5GYR3|F5GYR3_HUMAN;tr|F5H359|F5H359_HUMAN;tr|F5H8G6|F5H8G6_HUMAN	sp|P46087|NOP2_HUMAN;tr|A0A087WV73|A0A087WV73_HUMAN	1.29539	1.20816	1.06631	1.27429	1.3027	92420000	63841000	80549000	74258000	76548000	119720000	77130000	85890000	94626000	99719000	26;25;5;5;5;4;3;2	26;25;5;5;5;4;3;2	26;25;5;5;5;4;3;2	sp|P46087|NOP2_HUMAN Probable 28S rRNA (cytosine(4447)-C(5))-methyltransferase OS=Homo sapiens GN=NOP2 PE=1 SV=2;tr|A0A087WV73|A0A087WV73_HUMAN Probable 28S rRNA (cytosine(4447)-C(5))-methyltransferase OS=Homo sapiens GN=NOP2 PE=1 SV=1	8	26	26	26	19	18	17	16	18	21	16	16	15	22	19	18	17	16	18	21	16	16	15	22	19	18	17	16	18
sp|Q05481|ZNF91_HUMAN;sp|Q8N4W9|ZN808_HUMAN;sp|Q96N58|ZN578_HUMAN;sp|A2RRD8|ZN320_HUMAN;tr|M0R1D1|M0R1D1_HUMAN;tr|A0A087WZK5|A0A087WZK5_HUMAN;tr|A0A087X0A2|A0A087X0A2_HUMAN;sp|Q8N7Q3|ZN676_HUMAN;sp|Q03923|ZNF85_HUMAN;sp|O43309|ZSC12_HUMAN;tr|A0A087WZJ7|A0A087WZJ7_HUMAN;sp|A8MTY0|ZN724_HUMAN;sp|P0DKX0|ZN728_HUMAN;sp|Q96N22|ZN681_HUMAN;sp|Q6ZR52|ZN493_HUMAN;sp|O75437|ZN254_HUMAN;sp|Q03936|ZNF92_HUM…	sp|Q05481|ZNF91_HUMAN;sp|Q8N4W9|ZN808_HUMAN;sp|Q96N58|ZN578_HUMAN;sp|A2RRD8|ZN320_HUMAN	1.31374	1	2.12671e-07	1	2062600	4679300	1	4702100	1	1	6147400	1	1	1	2062600	3;2;2;2;1;1;1;1;1;1;1;1;1;1;1;1;1;1;1;1;1;1;1;1;1;1;1;1;1;1;1;1;1;1;1;1;1;1;1;1;1;1;1;1;1;1;1;1;1;1;1;1;1;1;1;1;1;1;1	3;2;2;2;1;1;1;1;1;1;1;1;1;1;1;1;1;1;1;1;1;1;1;1;1;1;1;1;1;1;1;1;1;1;1;1;1;1;1;1;1;1;1;1;1;1;1;1;1;1;1;1;1;1;1;1;1;1;1	1;0;0;0;0;0;0;0;0;0;0;0;0;0;0;0;0;0;0;0;0;0;0;0;0;0;0;0;0;0;0;0;0;0;0;0;0;0;0;0;0;0;0;0;0;0;0;0;0;0;0;0;0;0;0;0;0;0;0	sp|Q05481|ZNF91_HUMAN Zinc finger protein 91 OS=Homo sapiens GN=ZNF91 PE=2 SV=2;sp|Q8N4W9|ZN808_HUMAN Zinc finger protein 808 OS=Homo sapiens GN=ZNF808 PE=2 SV=2;sp|Q96N58|ZN578_HUMAN Zinc finger protein 578 OS=Homo sapiens GN=ZNF578 PE=2 SV=2;sp|A2RRD8|ZN	59	3	3	1	2	2	1	1	2	1	2	1	1	1	2	2	1	1	2	1	2	1	1	1	1	1	0	0	1
sp|P11388|TOP2A_HUMAN;tr|J3KTB7|J3KTB7_HUMAN	sp|P11388|TOP2A_HUMAN	1.42665	0.700406	1.39556	1.02649	2.58577	7057800	6965100	4606400	2246000	1354800	10069000	4878400	6428500	2305500	3503200	13;3	13;3	8;0	sp|P11388|TOP2A_HUMAN DNA topoisomerase 2-alpha OS=Homo sapiens GN=TOP2A PE=1 SV=3	2	13	13	8	10	9	6	2	2	9	6	9	2	4	10	9	6	2	2	9	6	9	2	4	7	6	4	1	2
sp|Q9UJV9|DDX41_HUMAN;tr|J3KNN5|J3KNN5_HUMAN;tr|H0YA06|H0YA06_HUMAN;tr|H0Y8L8|H0Y8L8_HUMAN;tr|D6RGI7|D6RGI7_HUMAN	sp|Q9UJV9|DDX41_HUMAN;tr|J3KNN5|J3KNN5_HUMAN	1.05592	1.03088	0.997395	3495400	1.1058	5264300	4679900	5796700	1	3628400	5558700	4824400	5781600	3495400	4012300	11;11;1;1;1	11;11;1;1;1	11;11;1;1;1	sp|Q9UJV9|DDX41_HUMAN Probable ATP-dependent RNA helicase DDX41 OS=Homo sapiens GN=DDX41 PE=1 SV=2;tr|J3KNN5|J3KNN5_HUMAN Probable ATP-dependent RNA helicase DDX41 (Fragment) OS=Homo sapiens GN=DDX41 PE=1 SV=1	5	11	11	11	6	5	8	1	3	7	5	7	3	5	6	5	8	1	3	7	5	7	3	5	6	5	8	1	3
sp|Q9NX24|NHP2_HUMAN;tr|D6RC52|D6RC52_HUMAN;tr|D6RCB9|D6RCB9_HUMAN;tr|H0YC83|H0YC83_HUMAN;tr|J3QSY4|J3QSY4_HUMAN	sp|Q9NX24|NHP2_HUMAN;tr|D6RC52|D6RC52_HUMAN;tr|D6RCB9|D6RCB9_HUMAN	1.61651	1.18173	1.23747	0.945327	1.10207	6083800	4707500	6490200	6882800	5826400	9834500	5563000	8031400	6506500	6421100	3;2;2;1;1	3;2;2;1;1	3;2;2;1;1	sp|Q9NX24|NHP2_HUMAN H/ACA ribonucleoprotein complex subunit 2 OS=Homo sapiens GN=NHP2 PE=1 SV=1;tr|D6RC52|D6RC52_HUMAN H/ACA ribonucleoprotein complex subunit 2 (Fragment) OS=Homo sapiens GN=NHP2 PE=1 SV=1;tr|D6RCB9|D6RCB9_HUMAN H/ACA ribonucleoprotein co	5	3	3	3	3	2	3	1	2	3	2	2	2	3	3	2	3	1	2	3	2	2	2	3	3	2	3	1	2
sp|P62280|RS11_HUMAN;tr|M0QZC5|M0QZC5_HUMAN;tr|M0R1H5|M0R1H5_HUMAN;tr|M0R1H6|M0R1H6_HUMAN	sp|P62280|RS11_HUMAN;tr|M0QZC5|M0QZC5_HUMAN	1.29139	3802000	2127700	1	1.14619	2346000	1	1	1	1859900	3029600	3802000	2127700	1	2131800	6;6;2;2	6;6;2;2	6;6;2;2	sp|P62280|RS11_HUMAN 40S ribosomal protein S11 OS=Homo sapiens GN=RPS11 PE=1 SV=3;tr|M0QZC5|M0QZC5_HUMAN 40S ribosomal protein S11 OS=Homo sapiens GN=RPS11 PE=1 SV=1	4	6	6	6	3	3	2	0	2	2	4	2	0	2	3	3	2	0	2	2	4	2	0	2	3	3	2	0	2
sp|P08670|VIME_HUMAN;tr|B0YJC4|B0YJC4_HUMAN;tr|B0YJC5|B0YJC5_HUMAN;tr|Q5JVS8|Q5JVS8_HUMAN;sp|P17661|DESM_HUMAN;tr|H7C5W5|H7C5W5_HUMAN;sp|P41219|PERI_HUMAN;sp|P14136|GFAP_HUMAN;tr|K7EKH6|K7EKH6_HUMAN;tr|F8W835|F8W835_HUMAN;sp|P12036|NFH_HUMAN	sp|P08670|VIME_HUMAN;tr|B0YJC4|B0YJC4_HUMAN	1.30069	1.25065	1.12143	1.05728	1.37483	155910000	218390000	194100000	198150000	131260000	202790000	273130000	217670000	209500000	180460000	42;39;19;13;5;4;4;2;1;1;1	39;36;19;13;3;2;2;1;1;1;1	38;35;18;13;2;2;2;1;1;1;0	sp|P08670|VIME_HUMAN Vimentin OS=Homo sapiens GN=VIM PE=1 SV=4;tr|B0YJC4|B0YJC4_HUMAN Vimentin OS=Homo sapiens GN=VIM PE=1 SV=1	11	42	39	38	30	28	27	26	27	32	28	26	26	29	30	26	25	25	25	30	27	25	24	27	29	25	24	24	24
sp|Q13242|SRSF9_HUMAN;tr|H0YIB4|H0YIB4_HUMAN;tr|S4R3G0|S4R3G0_HUMAN	sp|Q13242|SRSF9_HUMAN;tr|H0YIB4|H0YIB4_HUMAN;tr|S4R3G0|S4R3G0_HUMAN	1.28539	1	3067300	1	1	2568400	1	1	1	1	3301400	1	3067300	1	1	7;5;5	6;5;4	6;5;4	sp|Q13242|SRSF9_HUMAN Serine/arginine-rich splicing factor 9 OS=Homo sapiens GN=SRSF9 PE=1 SV=1;tr|H0YIB4|H0YIB4_HUMAN Serine/arginine-rich-splicing factor 9 (Fragment) OS=Homo sapiens GN=SRSF9 PE=1 SV=5;tr|S4R3G0|S4R3G0_HUMAN Serine/arginine-rich-splicing	3	7	6	6	3	2	3	0	2	4	1	3	0	2	3	2	3	0	1	4	1	3	0	2	3	2	3	0	1
sp|Q09028|RBBP4_HUMAN;tr|E9PC52|E9PC52_HUMAN;sp|Q16576|RBBP7_HUMAN;tr|H0YCT5|H0YCT5_HUMAN;tr|H0YDK2|H0YDK2_HUMAN;tr|H0YF10|H0YF10_HUMAN;tr|H0YEU5|H0YEU5_HUMAN;tr|Q5JP02|Q5JP02_HUMAN;tr|E9PNS2|E9PNS2_HUMAN;tr|E9PIC4|E9PIC4_HUMAN;tr|E9PNS6|E9PNS6_HUMAN;tr|Q5JP01|Q5JP01_HUMAN;tr|C9JAJ9|C9JAJ9_HUMAN;tr|Q5JNZ6|Q5JNZ6_HUMAN;tr|C9JPP3|C9JPP3_HUMAN	sp|Q09028|RBBP4_HUMAN;tr|E9PC52|E9PC52_HUMAN;sp|Q16576|RBBP7_HUMAN;tr|H0YCT5|H0YCT5_HUMAN;tr|H0YDK2|H0YDK2_HUMAN;tr|H0YF10|H0YF10_HUMAN	0.750024	0.749214	1.16395	0.969437	5067700	4120800	4928100	3858000	3517300	1	3090700	3692200	4490500	3409800	5067700	9;6;6;5;5;5;4;4;2;2;2;2;1;1;1	9;6;6;5;5;5;4;4;2;2;2;2;1;1;1	9;6;6;5;5;5;4;4;2;2;2;2;1;1;1	sp|Q09028|RBBP4_HUMAN Histone-binding protein RBBP4 OS=Homo sapiens GN=RBBP4 PE=1 SV=3;tr|E9PC52|E9PC52_HUMAN Histone-binding protein RBBP7 OS=Homo sapiens GN=RBBP7 PE=1 SV=1;sp|Q16576|RBBP7_HUMAN Histone-binding protein RBBP7 OS=Homo sapiens GN=RBBP7 PE=1	15	9	9	9	6	3	5	2	1	3	7	5	2	5	6	3	5	2	1	3	7	5	2	5	6	3	5	2	1
sp|Q13247|SRSF6_HUMAN;tr|A0A0D9SEM4|A0A0D9SEM4_HUMAN;sp|Q08170|SRSF4_HUMAN	sp|Q13247|SRSF6_HUMAN	1.3417	1.19061	0.946003	1.27853	1.21434	10161000	7943900	8800500	6381300	9783900	13633000	9458100	8325300	8158700	11881000	7;3;3	7;3;3	6;2;2	sp|Q13247|SRSF6_HUMAN Serine/arginine-rich splicing factor 6 OS=Homo sapiens GN=SRSF6 PE=1 SV=2	3	7	7	6	5	5	5	2	5	5	5	4	2	6	5	5	5	2	5	5	5	4	2	6	5	4	5	1	5
sp|O43818|U3IP2_HUMAN	sp|O43818|U3IP2_HUMAN	1.38094	1.05147	0.933314	1.26788	1.28335	11692000	9793900	8307600	6426100	7499500	16146000	10298000	7753600	8147500	9624500	12	12	12	sp|O43818|U3IP2_HUMAN U3 small nucleolar RNA-interacting protein 2 OS=Homo sapiens GN=RRP9 PE=1 SV=1	1	12	12	12	10	5	5	3	6	8	5	4	5	5	10	5	5	3	6	8	5	4	5	5	10	5	5	3	6
sp|Q12788|TBL3_HUMAN;tr|J3KNP2|J3KNP2_HUMAN;tr|A0A087WYP7|A0A087WYP7_HUMAN	sp|Q12788|TBL3_HUMAN;tr|J3KNP2|J3KNP2_HUMAN	1.27332	0.990444	1.14717	1	1.34424	3517800	2187200	1780200	1	3245100	4479300	2166300	2042200	1	4362200	9;8;2	9;8;2	9;8;2	sp|Q12788|TBL3_HUMAN Transducin beta-like protein 3 OS=Homo sapiens GN=TBL3 PE=1 SV=2;tr|J3KNP2|J3KNP2_HUMAN Transducin beta-like protein 3 (Fragment) OS=Homo sapiens GN=TBL3 PE=1 SV=1	3	9	9	9	3	3	2	1	3	5	4	2	0	6	3	3	2	1	3	5	4	2	0	6	3	3	2	1	3
sp|Q5VTE0|EF1A3_HUMAN;sp|P68104|EF1A1_HUMAN;tr|A0A087WVQ9|A0A087WVQ9_HUMAN;sp|Q05639|EF1A2_HUMAN;tr|A0A087WV01|A0A087WV01_HUMAN;tr|A6PW80|A6PW80_HUMAN;tr|Q5JR01|Q5JR01_HUMAN	sp|Q5VTE0|EF1A3_HUMAN;sp|P68104|EF1A1_HUMAN;tr|A0A087WVQ9|A0A087WVQ9_HUMAN;sp|Q05639|EF1A2_HUMAN;tr|A0A087WV01|A0A087WV01_HUMAN	1.53109	1.10456	1.25295	0.948251	1.07037	19251000	18563000	20921000	17005000	19922000	29475000	20504000	26213000	16125000	21324000	8;8;7;6;5;3;3	8;8;7;6;5;3;3	8;8;7;6;5;3;3	sp|Q5VTE0|EF1A3_HUMAN Putative elongation factor 1-alpha-like 3 OS=Homo sapiens GN=EEF1A1P5 PE=5 SV=1;sp|P68104|EF1A1_HUMAN Elongation factor 1-alpha 1 OS=Homo sapiens GN=EEF1A1 PE=1 SV=1;tr|A0A087WVQ9|A0A087WVQ9_HUMAN Elongation factor 1-alpha 1 OS=Homo s	7	8	8	8	5	7	4	3	5	6	5	6	4	4	5	7	4	3	5	6	5	6	4	4	5	7	4	3	5
tr|H0YN42|H0YN42_HUMAN;tr|H0YMU9|H0YMU9_HUMAN;tr|H0YMD0|H0YMD0_HUMAN;tr|H0YKS4|H0YKS4_HUMAN;sp|P07355|ANXA2_HUMAN;tr|H0YMM1|H0YMM1_HUMAN;tr|H0YMT9|H0YMT9_HUMAN;tr|H0YM50|H0YM50_HUMAN;tr|H0YMW4|H0YMW4_HUMAN;tr|H0YKX9|H0YKX9_HUMAN;tr|H0YLV6|H0YLV6_HUMAN;tr|H0YKZ7|H0YKZ7_HUMAN;sp|A6NMY6|AXA2L_HUMAN;tr|H0YKL9|H0YKL9_HUMAN;tr|H0YNP5|H0YNP5_HUMAN;tr|H0YKV8|H0YKV8_HUMAN;tr|H0YN28|H0YN28_HUMAN;tr|H0YN52|…	tr|H0YN42|H0YN42_HUMAN;tr|H0YMU9|H0YMU9_HUMAN;tr|H0YMD0|H0YMD0_HUMAN;tr|H0YKS4|H0YKS4_HUMAN;sp|P07355|ANXA2_HUMAN;tr|H0YMM1|H0YMM1_HUMAN;tr|H0YMT9|H0YMT9_HUMAN;tr|H0YM50|H0YM50_HUMAN;tr|H0YMW4|H0YMW4_HUMAN;tr|H0YKX9|H0YKX9_HUMAN;tr|H0YLV6|H0YLV6_HUMAN;tr|H0YKZ7|H0YKZ7_HUMAN;sp|A6NMY6|AXA2L_HUMAN;tr|H0YKL9|H0YKL9_HUMAN;tr|H0YNP5|H0YNP5_HUMAN;tr|H0YKV8|H0YKV8_HUMAN	1.27024	0.761096	1.06971	1	0.846955	1719200	2203400	1577900	1	1622400	2183800	1677000	1687900	1	1374100	6;6;6;6;6;5;4;4;4;4;4;4;4;3;3;3;2;2;2;2;2;1;1;1	6;6;6;6;6;5;4;4;4;4;4;4;4;3;3;3;2;2;2;2;2;1;1;1	6;6;6;6;6;5;4;4;4;4;4;4;4;3;3;3;2;2;2;2;2;1;1;1	tr|H0YN42|H0YN42_HUMAN Annexin (Fragment) OS=Homo sapiens GN=ANXA2 PE=1 SV=1;tr|H0YMU9|H0YMU9_HUMAN Annexin OS=Homo sapiens GN=ANXA2 PE=1 SV=1;tr|H0YMD0|H0YMD0_HUMAN Annexin (Fragment) OS=Homo sapiens GN=ANXA2 PE=1 SV=1;tr|H0YKS4|H0YKS4_HUMAN Annexin (Frag	24	6	6	6	5	3	3	0	4	4	2	2	0	4	5	3	3	0	4	4	2	2	0	4	5	3	3	0	4
sp|Q8TED0|UTP15_HUMAN;tr|H0Y8P4|H0Y8P4_HUMAN;tr|D6RF65|D6RF65_HUMAN;REV__sp|Q8TED0|UTP15_HUMAN;REV__tr|H0Y8P4|H0Y8P4_HUMAN	sp|Q8TED0|UTP15_HUMAN;tr|H0Y8P4|H0Y8P4_HUMAN	1.26308	1.04066	1.2263	0.833001	1.4114	12521000	9716900	11803000	8965900	12003000	15815000	10112000	14474000	7468600	16941000	20;18;3;1;1	20;18;3;1;1	20;18;3;1;1	sp|Q8TED0|UTP15_HUMAN U3 small nucleolar RNA-associated protein 15 homolog OS=Homo sapiens GN=UTP15 PE=1 SV=3;tr|H0Y8P4|H0Y8P4_HUMAN U3 small nucleolar RNA-associated protein 15 homolog (Fragment) OS=Homo sapiens GN=UTP15 PE=1 SV=1	5	20	20	20	10	9	10	7	7	7	10	6	4	8	10	9	10	7	7	7	10	6	4	8	10	9	10	7	7
sp|P08579|RU2B_HUMAN	sp|P08579|RU2B_HUMAN	1.26739	5973200	1.6309e-07	0.773902	1.87695e-07	3777200	1	6131600	4683800	5327800	4787200	5973200	1	3624800	1	5	5	4	sp|P08579|RU2B_HUMAN U2 small nuclear ribonucleoprotein B OS=Homo sapiens GN=SNRPB2 PE=1 SV=1	1	5	5	4	3	1	3	2	3	4	2	2	2	2	3	1	3	2	3	4	2	2	2	2	3	1	2	1	3
sp|P18077|RL35A_HUMAN;tr|C9K025|C9K025_HUMAN;tr|F8WB72|F8WB72_HUMAN;tr|F8WBS5|F8WBS5_HUMAN	sp|P18077|RL35A_HUMAN;tr|C9K025|C9K025_HUMAN	1.37241	0.815952	1.11595	1.48572	1.14429	105260000	98322000	95157000	74422000	76526000	144460000	80226000	106190000	110570000	87568000	9;7;4;4	9;7;4;4	9;7;4;4	sp|P18077|RL35A_HUMAN 60S ribosomal protein L35a OS=Homo sapiens GN=RPL35A PE=1 SV=2;tr|C9K025|C9K025_HUMAN 60S ribosomal protein L35a (Fragment) OS=Homo sapiens GN=RPL35A PE=1 SV=1	4	9	9	9	6	6	6	6	5	7	6	4	6	3	6	6	6	6	5	7	6	4	6	3	6	6	6	6	5
sp|Q13823|NOG2_HUMAN;tr|H0YG10|H0YG10_HUMAN	sp|Q13823|NOG2_HUMAN	1.16472	1.07456	1.10123	1.20579	1.27433	18893000	12915000	18463000	17887000	19761000	22005000	13878000	20332000	21568000	25182000	25;5	25;5	25;5	sp|Q13823|NOG2_HUMAN Nucleolar GTP-binding protein 2 OS=Homo sapiens GN=GNL2 PE=1 SV=1	2	25	25	25	15	8	17	9	11	17	11	13	8	14	15	8	17	9	11	17	11	13	8	14	15	8	17	9	11
tr|Q5JY65|Q5JY65_HUMAN;sp|Q9BZJ0|CRNL1_HUMAN	tr|Q5JY65|Q5JY65_HUMAN;sp|Q9BZJ0|CRNL1_HUMAN	1.26083	0.52612	0.935562	1	1.27655	1740600	2658900	1783100	1	1816300	2194600	1398900	1668200	1	2318600	9;9	9;9	9;9	tr|Q5JY65|Q5JY65_HUMAN Crooked neck-like protein 1 OS=Homo sapiens GN=CRNKL1 PE=1 SV=1;sp|Q9BZJ0|CRNL1_HUMAN Crooked neck-like protein 1 OS=Homo sapiens GN=CRNKL1 PE=1 SV=4	2	9	9	9	5	4	4	1	3	6	3	3	1	4	5	4	4	1	3	6	3	3	1	4	5	4	4	1	3
sp|P51116|FXR2_HUMAN;tr|I3L1Z2|I3L1Z2_HUMAN	sp|P51116|FXR2_HUMAN	1.26025	2.264	0.828217	1	0.963098	4706700	1764000	3478800	1	3297900	5931600	3993700	2881200	1	3176200	13;3	11;3	10;3	sp|P51116|FXR2_HUMAN Fragile X mental retardation syndrome-related protein 2 OS=Homo sapiens GN=FXR2 PE=1 SV=2	2	13	11	10	8	3	4	2	5	9	6	4	3	6	7	3	3	1	3	8	4	4	1	4	6	2	2	0	2
sp|Q9UQE7|SMC3_HUMAN	sp|Q9UQE7|SMC3_HUMAN	1.25846	1.04621	3.91988e-07	1	1	2097800	2229100	2551100	1	1	2640000	2332100	1	1	1	17	17	17	sp|Q9UQE7|SMC3_HUMAN Structural maintenance of chromosomes protein 3 OS=Homo sapiens GN=SMC3 PE=1 SV=2	1	17	17	17	5	5	6	0	0	7	5	0	0	1	5	5	6	0	0	7	5	0	0	1	5	5	6	0	0
tr|D6RAN4|D6RAN4_HUMAN;sp|P32969|RL9_HUMAN;tr|H0Y9V9|H0Y9V9_HUMAN;tr|E7ESE0|E7ESE0_HUMAN;tr|H0Y9R4|H0Y9R4_HUMAN	tr|D6RAN4|D6RAN4_HUMAN;sp|P32969|RL9_HUMAN;tr|H0Y9V9|H0Y9V9_HUMAN;tr|E7ESE0|E7ESE0_HUMAN	1.25469	0.87006	0.996918	3.06814e-08	1.45116	18391000	28190000	26931000	32593000	21992000	23075000	24527000	26848000	1	31914000	7;7;6;5;3	7;7;6;5;3	7;7;6;5;3	tr|D6RAN4|D6RAN4_HUMAN 60S ribosomal protein L9 (Fragment) OS=Homo sapiens GN=RPL9 PE=1 SV=5;sp|P32969|RL9_HUMAN 60S ribosomal protein L9 OS=Homo sapiens GN=RPL9 PE=1 SV=1;tr|H0Y9V9|H0Y9V9_HUMAN 60S ribosomal protein L9 (Fragment) OS=Homo sapiens GN=RPL9 P	5	7	7	7	5	4	4	2	4	3	5	3	1	5	5	4	4	2	4	3	5	3	1	5	5	4	4	2	4
sp|Q06830|PRDX1_HUMAN;tr|A0A0A0MSI0|A0A0A0MSI0_HUMAN;tr|A0A0A0MRQ5|A0A0A0MRQ5_HUMAN	sp|Q06830|PRDX1_HUMAN;tr|A0A0A0MSI0|A0A0A0MSI0_HUMAN;tr|A0A0A0MRQ5|A0A0A0MRQ5_HUMAN	1.24044	0.838627	5.18699e-07	1	1	1333400	2383300	1927900	1	1	1654000	1998700	1	1	1	6;6;3	6;6;3	4;4;1	sp|Q06830|PRDX1_HUMAN Peroxiredoxin-1 OS=Homo sapiens GN=PRDX1 PE=1 SV=1;tr|A0A0A0MSI0|A0A0A0MSI0_HUMAN Peroxiredoxin-1 (Fragment) OS=Homo sapiens GN=PRDX1 PE=1 SV=1;tr|A0A0A0MRQ5|A0A0A0MRQ5_HUMAN Peroxiredoxin-1 OS=Homo sapiens GN=PRDX1 PE=1 SV=1	3	6	6	4	3	3	2	1	2	3	3	2	0	2	3	3	2	1	2	3	3	2	0	2	2	2	1	1	2
sp|P60842|IF4A1_HUMAN;tr|J3QL43|J3QL43_HUMAN;tr|J3KT12|J3KT12_HUMAN;tr|J3QS69|J3QS69_HUMAN;tr|J3QR64|J3QR64_HUMAN;sp|Q14240|IF4A2_HUMAN;tr|E7EQG2|E7EQG2_HUMAN;tr|J3KTB5|J3KTB5_HUMAN;tr|J3QLN6|J3QLN6_HUMAN;tr|J3KS25|J3KS25_HUMAN;tr|J3KSZ0|J3KSZ0_HUMAN;tr|J3QKZ9|J3QKZ9_HUMAN;tr|J3KTN0|J3KTN0_HUMAN;tr|J3KSN7|J3KSN7_HUMAN;tr|J3KS93|J3KS93_HUMAN;tr|E7EMV8|E7EMV8_HUMAN;tr|J3KT04|J3KT04_HUMAN	sp|P60842|IF4A1_HUMAN;tr|J3QL43|J3QL43_HUMAN;tr|J3KT12|J3KT12_HUMAN;tr|J3QS69|J3QS69_HUMAN;tr|J3QR64|J3QR64_HUMAN;sp|Q14240|IF4A2_HUMAN;tr|E7EQG2|E7EQG2_HUMAN;tr|J3KTB5|J3KTB5_HUMAN;tr|J3QLN6|J3QLN6_HUMAN;tr|J3KS25|J3KS25_HUMAN	1.23784	1.00271	1.20297	1	0.92682	2715300	2137100	3269400	1	2749400	3361100	2142900	3933000	1	2548200	11;9;9;8;7;7;7;7;6;6;5;5;4;3;2;2;2	8;6;6;5;6;4;4;6;5;5;3;4;2;2;1;1;1	8;6;6;5;6;4;4;6;5;5;3;4;2;2;1;1;1	sp|P60842|IF4A1_HUMAN Eukaryotic initiation factor 4A-I OS=Homo sapiens GN=EIF4A1 PE=1 SV=1;tr|J3QL43|J3QL43_HUMAN Eukaryotic initiation factor 4A-I (Fragment) OS=Homo sapiens GN=EIF4A1 PE=1 SV=1;tr|J3KT12|J3KT12_HUMAN Eukaryotic initiation factor 4A-I OS=	17	11	8	8	7	6	6	2	3	6	4	6	1	5	5	5	4	1	2	5	3	5	0	3	5	5	4	1	2
sp|P23588|IF4B_HUMAN;tr|E7EX17|E7EX17_HUMAN;tr|F8VX11|F8VX11_HUMAN;tr|F8VP89|F8VP89_HUMAN;tr|F8VSC7|F8VSC7_HUMAN;tr|F8W0K0|F8W0K0_HUMAN;tr|F8VYE9|F8VYE9_HUMAN;tr|F8VRU1|F8VRU1_HUMAN;REV__tr|F8VX11|F8VX11_HUMAN;REV__sp|P23588|IF4B_HUMAN;REV__tr|E7EX17|E7EX17_HUMAN	sp|P23588|IF4B_HUMAN;tr|E7EX17|E7EX17_HUMAN	1.23764	1.09443	0.758569	0.832703	0.691441	128050000	171550000	174170000	304310000	216490000	158480000	187750000	132120000	253400000	149690000	36;36;15;14;11;9;5;3;2;2;2	36;36;15;14;11;9;5;3;2;2;2	36;36;15;14;11;9;5;3;2;2;2	sp|P23588|IF4B_HUMAN Eukaryotic translation initiation factor 4B OS=Homo sapiens GN=EIF4B PE=1 SV=2;tr|E7EX17|E7EX17_HUMAN Eukaryotic translation initiation factor 4B OS=Homo sapiens GN=EIF4B PE=1 SV=1	11	36	36	36	20	24	23	25	21	23	23	25	22	20	20	24	23	25	21	23	23	25	22	20	20	24	23	25	21
sp|Q9GZR2|REXO4_HUMAN;tr|A0A0C4DG22|A0A0C4DG22_HUMAN;tr|A0A0C4DG31|A0A0C4DG31_HUMAN	sp|Q9GZR2|REXO4_HUMAN	1.23423	1	1208100	1	1.25776	1477200	1	1	1	976180	1823200	1	1208100	1	1227800	5;2;1	5;2;1	5;2;1	sp|Q9GZR2|REXO4_HUMAN RNA exonuclease 4 OS=Homo sapiens GN=REXO4 PE=1 SV=2	3	5	5	5	2	2	1	0	2	3	1	2	0	4	2	2	1	0	2	3	1	2	0	4	2	2	1	0	2
sp|Q9BU76|MMTA2_HUMAN	sp|Q9BU76|MMTA2_HUMAN	1.23097	0.931241	3.5791e-07	2723500	1.0286	3308200	3695500	2794000	1	2790000	4072300	3441400	1	2723500	2869800	6	6	6	sp|Q9BU76|MMTA2_HUMAN Multiple myeloma tumor-associated protein 2 OS=Homo sapiens GN=MMTAG2 PE=1 SV=1	1	6	6	6	5	4	3	1	2	4	2	1	2	4	5	4	3	1	2	4	2	1	2	4	5	4	3	1	2
tr|U3KQC1|U3KQC1_HUMAN;tr|A0A0A0MQU0|A0A0A0MQU0_HUMAN;sp|Q9BV38|WDR18_HUMAN;tr|K7EIR0|K7EIR0_HUMAN;tr|K7EML4|K7EML4_HUMAN;tr|A0A087X237|A0A087X237_HUMAN;tr|K7EKX5|K7EKX5_HUMAN	tr|U3KQC1|U3KQC1_HUMAN;tr|A0A0A0MQU0|A0A0A0MQU0_HUMAN;sp|Q9BV38|WDR18_HUMAN;tr|K7EIR0|K7EIR0_HUMAN;tr|K7EML4|K7EML4_HUMAN	1.22961	0.935783	0.772706	1	1.39214	3911000	3690600	3833800	1	2845900	4809000	3453600	2962400	1	3961900	8;8;8;7;4;2;2	8;8;8;7;4;2;2	8;8;8;7;4;2;2	tr|U3KQC1|U3KQC1_HUMAN WD repeat-containing protein 18 (Fragment) OS=Homo sapiens GN=WDR18 PE=1 SV=1;tr|A0A0A0MQU0|A0A0A0MQU0_HUMAN WD repeat-containing protein 18 (Fragment) OS=Homo sapiens GN=WDR18 PE=1 SV=1;sp|Q9BV38|WDR18_HUMAN WD repeat-containing pro	7	8	8	8	3	5	4	1	3	4	4	2	1	3	3	5	4	1	3	4	4	2	1	3	3	5	4	1	3
tr|A0A0A0MRA5|A0A0A0MRA5_HUMAN;tr|B7Z4B8|B7Z4B8_HUMAN;sp|Q9BUJ2|HNRL1_HUMAN;tr|M0QYZ0|M0QYZ0_HUMAN;tr|M0R3F1|M0R3F1_HUMAN;tr|M0R203|M0R203_HUMAN;tr|M0QZV6|M0QZV6_HUMAN;tr|M0R0K8|M0R0K8_HUMAN;tr|M0QYI8|M0QYI8_HUMAN;tr|M0QYM5|M0QYM5_HUMAN	tr|A0A0A0MRA5|A0A0A0MRA5_HUMAN;tr|B7Z4B8|B7Z4B8_HUMAN;sp|Q9BUJ2|HNRL1_HUMAN;tr|M0QYZ0|M0QYZ0_HUMAN;tr|M0R3F1|M0R3F1_HUMAN	1.3817	1.24919	1.17964	1.03146	0.989154	5072100	4703200	4399400	4634700	4554700	7008100	5875200	5189700	4780500	4505300	9;9;9;7;6;3;3;3;2;1	9;9;9;7;6;3;3;3;2;1	9;9;9;7;6;3;3;3;2;1	tr|A0A0A0MRA5|A0A0A0MRA5_HUMAN Heterogeneous nuclear ribonucleoprotein U-like protein 1 OS=Homo sapiens GN=HNRNPUL1 PE=1 SV=1;tr|B7Z4B8|B7Z4B8_HUMAN Heterogeneous nuclear ribonucleoprotein U-like protein 1 OS=Homo sapiens GN=HNRNPUL1 PE=1 SV=1;sp|Q9BUJ2|HN	10	9	9	9	6	4	3	3	2	7	4	5	3	3	6	4	3	3	2	7	4	5	3	3	6	4	3	3	2
sp|Q9Y5J1|UTP18_HUMAN;tr|J3KSR7|J3KSR7_HUMAN;tr|J3QR85|J3QR85_HUMAN;tr|J3QLD6|J3QLD6_HUMAN;tr|J3QRG0|J3QRG0_HUMAN	sp|Q9Y5J1|UTP18_HUMAN	1.18857	1.19103	1.13523	1.11142	1.21915	9328000	6318400	8891600	7334100	8771700	11087000	7525400	10094000	8151300	10694000	13;5;3;1;1	13;5;3;1;1	13;5;3;1;1	sp|Q9Y5J1|UTP18_HUMAN U3 small nucleolar RNA-associated protein 18 homolog OS=Homo sapiens GN=UTP18 PE=1 SV=3	5	13	13	13	7	6	6	6	9	9	8	6	6	6	7	6	6	6	9	9	8	6	6	6	7	6	6	6	9
sp|Q8WWY3|PRP31_HUMAN;tr|E7EVX8|E7EVX8_HUMAN;tr|E7EU94|E7EU94_HUMAN;tr|E7ESX0|E7ESX0_HUMAN;tr|E7EN72|E7EN72_HUMAN	sp|Q8WWY3|PRP31_HUMAN;tr|E7EVX8|E7EVX8_HUMAN;tr|E7EU94|E7EU94_HUMAN;tr|E7ESX0|E7ESX0_HUMAN;tr|E7EN72|E7EN72_HUMAN	0.879883	1.22305	1.40779	0.983183	1.36064	7426100	7618600	7583500	8075300	7393600	6534100	9317900	10676000	7939500	10060000	14;13;8;8;8	14;13;8;8;8	14;13;8;8;8	sp|Q8WWY3|PRP31_HUMAN U4/U6 small nuclear ribonucleoprotein Prp31 OS=Homo sapiens GN=PRPF31 PE=1 SV=2;tr|E7EVX8|E7EVX8_HUMAN U4/U6 small nuclear ribonucleoprotein Prp31 OS=Homo sapiens GN=PRPF31 PE=1 SV=1;tr|E7EU94|E7EU94_HUMAN U4/U6 small nuclear ribonucl	5	14	14	14	7	6	6	3	5	7	8	9	6	9	7	6	6	3	5	7	8	9	6	9	7	6	6	3	5
sp|Q14146|URB2_HUMAN;tr|Q5VYD0|Q5VYD0_HUMAN	sp|Q14146|URB2_HUMAN	1.20442	1.33582	5.02058e-07	1	1.08191	3509900	1943600	1991800	1	3690700	4227400	2596300	1	1	3993000	16;1	16;1	16;1	sp|Q14146|URB2_HUMAN Unhealthy ribosome biogenesis protein 2 homolog OS=Homo sapiens GN=URB2 PE=2 SV=2	2	16	16	16	6	2	3	0	8	8	4	2	1	8	6	2	3	0	8	8	4	2	1	8	6	2	3	0	8
sp|Q9Y3T9|NOC2L_HUMAN	sp|Q9Y3T9|NOC2L_HUMAN	1.01516	1.20321	1.45813	1.71134	0.920962	20848000	12637000	13400000	4861800	15600000	21164000	15205000	19539000	8320200	14367000	20	20	20	sp|Q9Y3T9|NOC2L_HUMAN Nucleolar complex protein 2 homolog OS=Homo sapiens GN=NOC2L PE=1 SV=4	1	20	20	20	14	7	9	3	10	11	12	12	4	8	14	7	9	3	10	11	12	12	4	8	14	7	9	3	10
tr|Q7Z6E1|Q7Z6E1_HUMAN;tr|A0A0G2JM46|A0A0G2JM46_HUMAN;tr|A0A0G2JMJ3|A0A0G2JMJ3_HUMAN;sp|Q6ZW35|F231D_HUMAN;tr|I3L1B9|I3L1B9_HUMAN;tr|E9PKX0|E9PKX0_HUMAN;tr|Q8WYK7|Q8WYK7_HUMAN;sp|P0DMU3|F231L_HUMAN;tr|K4DI94|K4DI94_HUMAN;tr|A6NDI8|A6NDI8_HUMAN	tr|Q7Z6E1|Q7Z6E1_HUMAN;tr|A0A0G2JM46|A0A0G2JM46_HUMAN;tr|A0A0G2JMJ3|A0A0G2JMJ3_HUMAN;sp|Q6ZW35|F231D_HUMAN	1.40103	1.45067	1.26004	0.771482	1.06428	3355100	4296500	3660200	4961100	3917000	4700600	6232800	4612000	3827400	4168800	10;10;10;10;3;2;1;1;1;1	10;10;10;10;3;2;1;1;1;1	7;7;7;7;2;1;0;0;0;0	tr|Q7Z6E1|Q7Z6E1_HUMAN HKR1 protein OS=Homo sapiens GN=HKR1 PE=2 SV=1;tr|A0A0G2JM46|A0A0G2JM46_HUMAN Leukocyte immunoglobulin-like receptor subfamily B member 3 OS=Homo sapiens GN=LILRB3 PE=4 SV=1;tr|A0A0G2JMJ3|A0A0G2JMJ3_HUMAN Natural cytotoxicity trigger	10	10	10	7	2	5	5	4	5	6	6	6	3	5	2	5	5	4	5	6	6	6	3	5	1	4	3	3	4
sp|Q9NYF8|BCLF1_HUMAN;tr|E9PK09|E9PK09_HUMAN;tr|E9PQN2|E9PQN2_HUMAN;tr|E9PKI6|E9PKI6_HUMAN;tr|E9PJA7|E9PJA7_HUMAN;tr|H0YF14|H0YF14_HUMAN;tr|H0YF00|H0YF00_HUMAN	sp|Q9NYF8|BCLF1_HUMAN;tr|E9PK09|E9PK09_HUMAN;tr|E9PQN2|E9PQN2_HUMAN;tr|E9PKI6|E9PKI6_HUMAN	1.12443	1.07339	1.21036	1.06345	1.3652	133330000	127270000	117940000	144040000	119440000	149920000	136610000	142750000	153180000	163060000	38;29;29;29;13;9;5	37;29;29;29;13;8;5	1;0;0;0;0;1;0	sp|Q9NYF8|BCLF1_HUMAN Bcl-2-associated transcription factor 1 OS=Homo sapiens GN=BCLAF1 PE=1 SV=2;tr|E9PK09|E9PK09_HUMAN Bcl-2-associated transcription factor 1 (Fragment) OS=Homo sapiens GN=BCLAF1 PE=1 SV=5;tr|E9PQN2|E9PQN2_HUMAN Bcl-2-associated transcri	7	38	37	1	21	28	21	18	24	22	22	16	17	28	20	27	20	17	23	22	22	16	17	27	0	1	1	0	1
sp|O15446|RPA34_HUMAN;tr|F5H2I5|F5H2I5_HUMAN	sp|O15446|RPA34_HUMAN;tr|F5H2I5|F5H2I5_HUMAN	1.19262	1	6.88942e-07	1	1	1330100	1	1451500	1	1	1586300	1	1	1	1	4;2	4;2	4;2	sp|O15446|RPA34_HUMAN DNA-directed RNA polymerase I subunit RPA34 OS=Homo sapiens GN=CD3EAP PE=1 SV=1;tr|F5H2I5|F5H2I5_HUMAN M-phase phosphoprotein 9 OS=Homo sapiens GN=MPHOSPH9 PE=4 SV=1	2	4	4	4	2	1	3	0	0	2	1	1	0	0	2	1	3	0	0	2	1	1	0	0	2	1	3	0	0
sp|Q15397|K0020_HUMAN;tr|S4R3K8|S4R3K8_HUMAN	sp|Q15397|K0020_HUMAN	1.69397	0.948539	1.02439	1.20356	1.01557	14201000	18577000	15745000	13937000	18045000	24056000	17621000	16129000	16774000	18326000	21;1	21;1	21;1	sp|Q15397|K0020_HUMAN Pumilio domain-containing protein KIAA0020 OS=Homo sapiens GN=KIAA0020 PE=1 SV=3	2	21	21	21	13	10	13	6	8	8	9	11	7	16	13	10	13	6	8	8	9	11	7	16	13	10	13	6	8
sp|O14744|ANM5_HUMAN;tr|G3V580|G3V580_HUMAN;tr|H0YJX6|H0YJX6_HUMAN;tr|G3V5L5|G3V5L5_HUMAN;tr|G3V2L6|G3V2L6_HUMAN;tr|G3V2X6|G3V2X6_HUMAN;tr|C9JSX3|C9JSX3_HUMAN;tr|H0YJD3|H0YJD3_HUMAN;tr|H7BZ44|H7BZ44_HUMAN;tr|H0YJ77|H0YJ77_HUMAN;tr|G3V5T6|G3V5T6_HUMAN;tr|G3V507|G3V507_HUMAN;tr|G3V2F5|G3V2F5_HUMAN	sp|O14744|ANM5_HUMAN	1.29414	1.39137	1.27785	0.794379	1.06742	83515000	128190000	113840000	134860000	95501000	108080000	178360000	145470000	107130000	101940000	28;13;12;9;9;8;8;5;5;4;3;2;2	28;13;12;9;9;8;8;5;5;4;3;2;2	28;13;12;9;9;8;8;5;5;4;3;2;2	sp|O14744|ANM5_HUMAN Protein arginine N-methyltransferase 5 OS=Homo sapiens GN=PRMT5 PE=1 SV=4	13	28	28	28	15	13	12	13	15	17	20	14	10	15	15	13	12	13	15	17	20	14	10	15	15	13	12	13	15
tr|B7Z6D5|B7Z6D5_HUMAN;sp|Q96GQ7|DDX27_HUMAN;tr|A0A087X059|A0A087X059_HUMAN;tr|A0A087WYH5|A0A087WYH5_HUMAN	tr|B7Z6D5|B7Z6D5_HUMAN;sp|Q96GQ7|DDX27_HUMAN	1.14196	0.951792	1.3183	1.08559	1.27054	15702000	12446000	11398000	11964000	13621000	17931000	11846000	15026000	12988000	17306000	15;15;4;1	15;15;4;1	15;15;4;1	tr|B7Z6D5|B7Z6D5_HUMAN Probable ATP-dependent RNA helicase DDX27 OS=Homo sapiens GN=DDX27 PE=1 SV=1;sp|Q96GQ7|DDX27_HUMAN Probable ATP-dependent RNA helicase DDX27 OS=Homo sapiens GN=DDX27 PE=1 SV=2	4	15	15	15	12	10	9	9	8	11	10	13	7	12	12	10	9	9	8	11	10	13	7	12	12	10	9	9	8
sp|O75152|ZC11A_HUMAN;tr|E9PQ61|E9PQ61_HUMAN;tr|E9PBY7|E9PBY7_HUMAN	sp|O75152|ZC11A_HUMAN;tr|E9PQ61|E9PQ61_HUMAN;tr|E9PBY7|E9PBY7_HUMAN	1.19003	1.11094	1.11506	1	1	1520800	2038900	1977200	1	1	1809800	2265100	2204700	1	1	8;6;5	8;6;5	8;6;5	sp|O75152|ZC11A_HUMAN Zinc finger CCCH domain-containing protein 11A OS=Homo sapiens GN=ZC3H11A PE=1 SV=3;tr|E9PQ61|E9PQ61_HUMAN Zinc finger CCCH domain-containing protein 11A OS=Homo sapiens GN=ZC3H11A PE=1 SV=1;tr|E9PBY7|E9PBY7_HUMAN Zinc finger CCCH dom	3	8	8	8	2	4	3	0	1	3	6	3	0	1	2	4	3	0	1	3	6	3	0	1	2	4	3	0	1
tr|Q5TEC6|Q5TEC6_HUMAN	tr|Q5TEC6|Q5TEC6_HUMAN	1.11101	1.1	0.822689	1.05244	1.76785	65148000	64918000	69821000	62052000	53844000	72380000	71410000	57441000	65306000	95188000	2	2	1	tr|Q5TEC6|Q5TEC6_HUMAN Histone H3 OS=Homo sapiens GN=HIST2H3PS2 PE=1 SV=1	1	2	2	1	2	2	2	1	2	2	2	2	2	2	2	2	2	1	2	2	2	2	2	2	1	1	1	0	1
sp|P22087|FBRL_HUMAN;tr|M0QXL5|M0QXL5_HUMAN;tr|M0R299|M0R299_HUMAN;tr|M0R2Q4|M0R2Q4_HUMAN;tr|M0R0P1|M0R0P1_HUMAN;tr|M0R2U2|M0R2U2_HUMAN;tr|M0R2B0|M0R2B0_HUMAN;tr|M0R1H0|M0R1H0_HUMAN;tr|A0A0D9SFM2|A0A0D9SFM2_HUMAN;tr|M0QXC9|M0QXC9_HUMAN	sp|P22087|FBRL_HUMAN;tr|M0QXL5|M0QXL5_HUMAN;tr|M0R299|M0R299_HUMAN;tr|M0R2Q4|M0R2Q4_HUMAN;tr|M0R0P1|M0R0P1_HUMAN;tr|M0R2U2|M0R2U2_HUMAN;tr|M0R2B0|M0R2B0_HUMAN;tr|M0R1H0|M0R1H0_HUMAN	1.38929	1.12803	0.834379	1.20283	1.1545	63832000	51135000	60246000	41379000	50065000	88681000	57682000	50268000	49772000	57800000	16;15;14;14;11;9;9;9;1;1	16;15;14;14;11;9;9;9;1;1	14;13;12;12;9;8;8;8;1;1	sp|P22087|FBRL_HUMAN rRNA 2-O-methyltransferase fibrillarin OS=Homo sapiens GN=FBL PE=1 SV=2;tr|M0QXL5|M0QXL5_HUMAN rRNA 2-O-methyltransferase fibrillarin (Fragment) OS=Homo sapiens GN=FBL PE=1 SV=1;tr|M0R299|M0R299_HUMAN rRNA 2-O-methyltransferase fibr	10	16	16	14	11	9	9	5	8	8	10	9	8	11	11	9	9	5	8	8	10	9	8	11	9	8	8	4	7
sp|Q9H307|PININ_HUMAN;tr|G3V5F0|G3V5F0_HUMAN;tr|G3V579|G3V579_HUMAN	sp|Q9H307|PININ_HUMAN	1.02473	0.878067	0.902772	2083500	0.979348	3117100	1956000	2417000	1	4081900	3194200	1717500	2182000	2083500	3997600	13;4;4	13;4;4	13;4;4	sp|Q9H307|PININ_HUMAN Pinin OS=Homo sapiens GN=PNN PE=1 SV=4	3	13	13	13	5	3	5	1	7	5	3	5	2	8	5	3	5	1	7	5	3	5	2	8	5	3	5	1	7
sp|Q14152|EIF3A_HUMAN	sp|Q14152|EIF3A_HUMAN	1.18813	1.70289	1.09306	1	0.620005	1417100	1441200	2084700	1	3075300	1683700	2454200	2278700	1	1906700	8	8	8	sp|Q14152|EIF3A_HUMAN Eukaryotic translation initiation factor 3 subunit A OS=Homo sapiens GN=EIF3A PE=1 SV=1	1	8	8	8	4	4	4	0	3	2	4	3	0	3	4	4	4	0	3	2	4	3	0	3	4	4	4	0	3
sp|Q9NZI8|IF2B1_HUMAN	sp|Q9NZI8|IF2B1_HUMAN	1.18733	1.15526	1.11656	1	0.797809	4577000	3910800	5668500	1	4198500	5434400	4518000	6329200	1	3349600	12	10	10	sp|Q9NZI8|IF2B1_HUMAN Insulin-like growth factor 2 mRNA-binding protein 1 OS=Homo sapiens GN=IGF2BP1 PE=1 SV=2	1	12	10	10	8	6	9	0	5	8	6	8	1	6	6	4	7	0	3	7	4	7	0	5	6	4	7	0	3
sp|Q9NY93|DDX56_HUMAN;tr|H7C3E9|H7C3E9_HUMAN;tr|J3KQ18|J3KQ18_HUMAN;tr|F8WDT8|F8WDT8_HUMAN;tr|F8WEI3|F8WEI3_HUMAN;tr|H7BZN7|H7BZN7_HUMAN	sp|Q9NY93|DDX56_HUMAN;tr|H7C3E9|H7C3E9_HUMAN;tr|J3KQ18|J3KQ18_HUMAN;tr|F8WDT8|F8WDT8_HUMAN	1.06143	1.15515	1.04207	1.01562	1.47026	16116000	9937200	12883000	14596000	12323000	17106000	11479000	13425000	14824000	18118000	17;12;11;9;5;4	17;12;11;9;5;4	17;12;11;9;5;4	sp|Q9NY93|DDX56_HUMAN Probable ATP-dependent RNA helicase DDX56 OS=Homo sapiens GN=DDX56 PE=1 SV=1;tr|H7C3E9|H7C3E9_HUMAN Probable ATP-dependent RNA helicase DDX56 (Fragment) OS=Homo sapiens GN=DDX56 PE=1 SV=1;tr|J3KQ18|J3KQ18_HUMAN D-dopachrome decarboxyl	6	17	17	17	10	8	8	7	11	10	8	6	5	10	10	8	8	7	11	10	8	6	5	10	10	8	8	7	11
tr|H3BSB3|H3BSB3_HUMAN;tr|H3BNT4|H3BNT4_HUMAN;sp|Q99547|MPH6_HUMAN	tr|H3BSB3|H3BSB3_HUMAN;tr|H3BNT4|H3BNT4_HUMAN;sp|Q99547|MPH6_HUMAN	1.1826	0.948802	1.49269	1	2206400	2408000	2746200	2762200	1	1	2847700	2605600	4123100	1	2206400	4;4;4	4;4;4	4;4;4	tr|H3BSB3|H3BSB3_HUMAN M-phase phosphoprotein 6 OS=Homo sapiens GN=MPHOSPH6 PE=1 SV=1;tr|H3BNT4|H3BNT4_HUMAN M-phase phosphoprotein 6 OS=Homo sapiens GN=MPHOSPH6 PE=1 SV=1;sp|Q99547|MPH6_HUMAN M-phase phosphoprotein 6 OS=Homo sapiens GN=MPHOSPH6 PE=1 SV=2	3	4	4	4	2	2	3	0	1	4	3	3	0	3	2	2	3	0	1	4	3	3	0	3	2	2	3	0	1
sp|Q9NVP1|DDX18_HUMAN;tr|H7C452|H7C452_HUMAN	sp|Q9NVP1|DDX18_HUMAN	1.09601	1.14601	0.953263	1.16388	1.31316	28061000	16177000	23365000	22205000	26919000	30755000	18539000	22273000	25844000	35349000	22;7	22;7	22;7	sp|Q9NVP1|DDX18_HUMAN ATP-dependent RNA helicase DDX18 OS=Homo sapiens GN=DDX18 PE=1 SV=2	2	22	22	22	13	9	11	9	7	12	10	12	9	17	13	9	11	9	7	12	10	12	9	17	13	9	11	9	7
sp|Q9GZL7|WDR12_HUMAN	sp|Q9GZL7|WDR12_HUMAN	0.830234	1.00224	1.29911	0.916523	1.58359	17424000	12961000	17368000	15046000	17000000	14466000	12990000	22563000	13790000	26921000	12	12	12	sp|Q9GZL7|WDR12_HUMAN Ribosome biogenesis protein WDR12 OS=Homo sapiens GN=WDR12 PE=1 SV=2	1	12	12	12	10	7	6	6	8	6	8	9	5	7	10	7	6	6	8	6	8	9	5	7	10	7	6	6	8
sp|Q8N8A6|DDX51_HUMAN	sp|Q8N8A6|DDX51_HUMAN	1.35438	1.04506	0.993818	1.3503	1.02158	4943600	5203800	6486700	4207500	5323900	6695500	5438300	6446600	5681400	5438800	15	15	15	sp|Q8N8A6|DDX51_HUMAN ATP-dependent RNA helicase DDX51 OS=Homo sapiens GN=DDX51 PE=1 SV=3	1	15	15	15	7	5	9	3	3	8	10	8	4	7	7	5	9	3	3	8	10	8	4	7	7	5	9	3	3
sp|Q8IY81|SPB1_HUMAN;tr|J3KS36|J3KS36_HUMAN;tr|J3KS74|J3KS74_HUMAN;tr|J3QSE2|J3QSE2_HUMAN;tr|J3QRS5|J3QRS5_HUMAN;tr|J3QR05|J3QR05_HUMAN	sp|Q8IY81|SPB1_HUMAN	1.19246	0.897666	0.9791	1.43382	1.30122	79772000	79006000	70288000	50184000	57161000	95125000	70921000	68819000	71955000	74379000	26;3;2;2;1;1	26;3;2;2;1;1	26;3;2;2;1;1	sp|Q8IY81|SPB1_HUMAN pre-rRNA processing protein FTSJ3 OS=Homo sapiens GN=FTSJ3 PE=1 SV=2	6	26	26	26	17	18	17	13	14	20	19	16	16	17	17	18	17	13	14	20	19	16	16	17	17	18	17	13	14
sp|Q9UN86|G3BP2_HUMAN;tr|D6RAC7|D6RAC7_HUMAN;tr|D6RB17|D6RB17_HUMAN;tr|D6RGJ4|D6RGJ4_HUMAN;tr|D6RBM9|D6RBM9_HUMAN;tr|D6REX8|D6REX8_HUMAN;tr|D6RBR0|D6RBR0_HUMAN;tr|D6RE13|D6RE13_HUMAN;tr|D6RBW8|D6RBW8_HUMAN;tr|D6R9A4|D6R9A4_HUMAN;tr|D6R9X5|D6R9X5_HUMAN	sp|Q9UN86|G3BP2_HUMAN;tr|D6RAC7|D6RAC7_HUMAN;tr|D6RB17|D6RB17_HUMAN	1.17431	1.08158	3.76322e-07	1	1.15679	2935000	2444200	2657300	1	2634800	3446600	2643600	1	1	3047900	9;5;5;4;3;3;3;3;3;2;2	8;4;4;3;2;2;2;2;2;1;1	8;4;4;3;2;2;2;2;2;1;1	sp|Q9UN86|G3BP2_HUMAN Ras GTPase-activating protein-binding protein 2 OS=Homo sapiens GN=G3BP2 PE=1 SV=2;tr|D6RAC7|D6RAC7_HUMAN Ras GTPase-activating protein-binding protein 2 (Fragment) OS=Homo sapiens GN=G3BP2 PE=1 SV=1;tr|D6RB17|D6RB17_HUMAN Ras GTPase-	11	9	8	8	3	6	3	1	2	6	3	1	1	3	3	6	3	1	2	5	3	1	1	3	3	6	3	1	2
sp|P25205|MCM3_HUMAN;tr|J3KQ69|J3KQ69_HUMAN;tr|Q7Z6P5|Q7Z6P5_HUMAN	sp|P25205|MCM3_HUMAN;tr|J3KQ69|J3KQ69_HUMAN	1.17329	1231300	1.59814	1	899850	1082000	1	1063800	1	1	1269500	1231300	1700100	1	899850	4;3;1	4;3;1	4;3;1	sp|P25205|MCM3_HUMAN DNA replication licensing factor MCM3 OS=Homo sapiens GN=MCM3 PE=1 SV=3;tr|J3KQ69|J3KQ69_HUMAN DNA replication licensing factor MCM3 OS=Homo sapiens GN=MCM3 PE=1 SV=2	3	4	4	4	2	3	3	0	0	2	2	3	0	2	2	3	3	0	0	2	2	3	0	2	2	3	3	0	0
sp|Q9NQ55|SSF1_HUMAN;tr|A0A0A6YYI3|A0A0A6YYI3_HUMAN;tr|A0A0B4J1V8|A0A0B4J1V8_HUMAN;tr|Q5FC07|Q5FC07_HUMAN;tr|C9J3W3|C9J3W3_HUMAN;tr|C9JHF7|C9JHF7_HUMAN	sp|Q9NQ55|SSF1_HUMAN;tr|A0A0A6YYI3|A0A0A6YYI3_HUMAN;tr|A0A0B4J1V8|A0A0B4J1V8_HUMAN;tr|Q5FC07|Q5FC07_HUMAN	1.05845	1.06589	1.09721	1.03631	1.34686	16699000	17332000	17920000	17487000	20988000	17675000	18474000	19662000	18122000	28268000	13;13;13;11;6;3	13;13;13;11;6;3	8;8;8;6;6;3	sp|Q9NQ55|SSF1_HUMAN Suppressor of SWI4 1 homolog OS=Homo sapiens GN=PPAN PE=1 SV=1;tr|A0A0A6YYI3|A0A0A6YYI3_HUMAN Protein PPAN-P2RY11 OS=Homo sapiens GN=PPAN-P2RY11 PE=1 SV=1;tr|A0A0B4J1V8|A0A0B4J1V8_HUMAN HCG2039996 OS=Homo sapiens GN=PPAN-P2RY11 PE=1 SV	6	13	13	8	6	5	8	4	6	6	6	6	7	8	6	5	8	4	6	6	6	6	7	8	4	2	5	3	3
sp|Q9Y2X3|NOP58_HUMAN;tr|H7BZ72|H7BZ72_HUMAN;tr|F8WED0|F8WED0_HUMAN	sp|Q9Y2X3|NOP58_HUMAN	1.39122	1.11575	0.904155	1.03148	1.17686	46680000	38308000	45605000	32818000	39884000	64942000	42742000	41234000	33851000	46938000	21;6;3	21;6;3	21;6;3	sp|Q9Y2X3|NOP58_HUMAN Nucleolar protein 58 OS=Homo sapiens GN=NOP58 PE=1 SV=1	3	21	21	21	13	11	17	8	12	12	11	11	8	13	13	11	17	8	12	12	11	11	8	13	13	11	17	8	12
sp|O75367|H2AY_HUMAN;tr|B4DJC3|B4DJC3_HUMAN;tr|D6RCF2|D6RCF2_HUMAN	sp|O75367|H2AY_HUMAN;tr|B4DJC3|B4DJC3_HUMAN	1.14796	1.16142	1.2332	1.15346	0.922502	15092000	12241000	13006000	10172000	12310000	17325000	14217000	16039000	11733000	11356000	10;6;4	10;6;4	8;5;2	sp|O75367|H2AY_HUMAN Core histone macro-H2A.1 OS=Homo sapiens GN=H2AFY PE=1 SV=4;tr|B4DJC3|B4DJC3_HUMAN Histone H2A OS=Homo sapiens GN=H2AFY PE=1 SV=1	3	10	10	8	7	7	8	6	6	8	7	4	4	7	7	7	8	6	6	8	7	4	4	7	6	6	6	5	5
sp|O75683|SURF6_HUMAN	sp|O75683|SURF6_HUMAN	1.33369	0.853609	1.0737	1.08725	1.36548	9152800	10791000	9276500	7165700	6910300	12207000	9211300	9960200	7790900	9435900	12	12	12	sp|O75683|SURF6_HUMAN Surfeit locus protein 6 OS=Homo sapiens GN=SURF6 PE=1 SV=3	1	12	12	12	5	3	4	3	7	6	6	4	3	7	5	3	4	3	7	6	6	4	3	7	5	3	4	3	7
tr|E7ETK0|E7ETK0_HUMAN;tr|A0A087WUS0|A0A087WUS0_HUMAN;sp|P62847|RS24_HUMAN	tr|E7ETK0|E7ETK0_HUMAN;tr|A0A087WUS0|A0A087WUS0_HUMAN;sp|P62847|RS24_HUMAN	1.16445	0.679276	0.957587	0.988636	0.685106	10137000	14389000	12779000	10648000	12958000	11804000	9774100	12237000	10527000	8877600	5;5;5	5;5;5	5;5;5	tr|E7ETK0|E7ETK0_HUMAN 40S ribosomal protein S24 OS=Homo sapiens GN=RPS24 PE=1 SV=1;tr|A0A087WUS0|A0A087WUS0_HUMAN 40S ribosomal protein S24 OS=Homo sapiens GN=RPS24 PE=1 SV=1;sp|P62847|RS24_HUMAN 40S ribosomal protein S24 OS=Homo sapiens GN=RPS24 PE=1 SV=	3	5	5	5	4	4	3	2	3	5	4	3	3	3	4	4	3	2	3	5	4	3	3	3	4	4	3	2	3
sp|Q14966|ZN638_HUMAN;tr|A0A096LPH6|A0A096LPH6_HUMAN;tr|A0A096LNR2|A0A096LNR2_HUMAN;tr|A0A096LNX0|A0A096LNX0_HUMAN;tr|A0A096LPI0|A0A096LPI0_HUMAN;tr|A0A096LNQ0|A0A096LNQ0_HUMAN;tr|A0A096LPB4|A0A096LPB4_HUMAN	sp|Q14966|ZN638_HUMAN;tr|A0A096LPH6|A0A096LPH6_HUMAN	1.16422	7.09119e-07	6.0983e-07	1	1	1639300	1410200	1639800	1	1	1908500	1	1	1	1	6;5;1;1;1;1;1	6;5;1;1;1;1;1	6;5;1;1;1;1;1	sp|Q14966|ZN638_HUMAN Zinc finger protein 638 OS=Homo sapiens GN=ZNF638 PE=1 SV=2;tr|A0A096LPH6|A0A096LPH6_HUMAN Zinc finger protein 638 OS=Homo sapiens GN=ZNF638 PE=1 SV=1	7	6	6	6	4	4	4	0	1	5	0	0	0	1	4	4	4	0	1	5	0	0	0	1	4	4	4	0	1
sp|Q14444|CAPR1_HUMAN;tr|E9PLA9|E9PLA9_HUMAN;tr|G3V153|G3V153_HUMAN;tr|A0A087X082|A0A087X082_HUMAN	sp|Q14444|CAPR1_HUMAN;tr|E9PLA9|E9PLA9_HUMAN;tr|G3V153|G3V153_HUMAN;tr|A0A087X082|A0A087X082_HUMAN	1.08913	1.29649	0.845172	2091600	0.762373	4439800	2248000	3218400	1	4008800	4835500	2914500	2720100	2091600	3056200	6;5;5;5	6;5;5;5	6;5;5;5	sp|Q14444|CAPR1_HUMAN Caprin-1 OS=Homo sapiens GN=CAPRIN1 PE=1 SV=2;tr|E9PLA9|E9PLA9_HUMAN Caprin-1 (Fragment) OS=Homo sapiens GN=CAPRIN1 PE=1 SV=1;tr|G3V153|G3V153_HUMAN Caprin-1 OS=Homo sapiens GN=CAPRIN1 PE=1 SV=1;tr|A0A087X082|A0A087X082_HUMAN Caprin-1	4	6	6	6	4	3	3	1	5	3	3	2	2	3	4	3	3	1	5	3	3	2	2	3	4	3	3	1	5
sp|Q8N257|H2B3B_HUMAN;sp|Q16778|H2B2E_HUMAN;sp|P33778|H2B1B_HUMAN;sp|P23527|H2B1O_HUMAN;sp|P06899|H2B1J_HUMAN;sp|Q6DRA6|H2B2D_HUMAN;sp|Q6DN03|H2B2C_HUMAN	sp|Q8N257|H2B3B_HUMAN;sp|Q16778|H2B2E_HUMAN;sp|P33778|H2B1B_HUMAN;sp|P23527|H2B1O_HUMAN;sp|P06899|H2B1J_HUMAN;sp|Q6DRA6|H2B2D_HUMAN;sp|Q6DN03|H2B2C_HUMAN	1.61094	0.95582	0.877254	1.44276	0.928006	84696000	106610000	123100000	110150000	156680000	136440000	101900000	107990000	158920000	145400000	6;6;6;6;6;3;3	6;6;6;6;6;3;3	2;2;2;2;2;2;2	sp|Q8N257|H2B3B_HUMAN Histone H2B type 3-B OS=Homo sapiens GN=HIST3H2BB PE=1 SV=3;sp|Q16778|H2B2E_HUMAN Histone H2B type 2-E OS=Homo sapiens GN=HIST2H2BE PE=1 SV=3;sp|P33778|H2B1B_HUMAN Histone H2B type 1-B OS=Homo sapiens GN=HIST1H2BB PE=1 SV=2;sp|P23527|	7	6	6	2	3	5	4	3	5	5	4	4	4	5	3	5	4	3	5	5	4	4	4	5	1	1	1	0	2
sp|P61964|WDR5_HUMAN;tr|V9GZ59|V9GZ59_HUMAN;tr|V9GYQ5|V9GYQ5_HUMAN	sp|P61964|WDR5_HUMAN	1.15039	0.973106	1.40252	2322800	0.695291	2490800	2658600	2363100	1	2877500	2865400	2587100	3314300	2322800	2000700	5;2;1	5;2;1	5;2;1	sp|P61964|WDR5_HUMAN WD repeat-containing protein 5 OS=Homo sapiens GN=WDR5 PE=1 SV=1	3	5	5	5	3	2	2	1	2	3	4	3	2	3	3	2	2	1	2	3	4	3	2	3	3	2	2	1	2
sp|P42285|SK2L2_HUMAN;tr|H0YAC4|H0YAC4_HUMAN;tr|H0Y8U3|H0Y8U3_HUMAN;tr|D6REC7|D6REC7_HUMAN	sp|P42285|SK2L2_HUMAN	1.15034	1.14324	0.792386	1	1.17957	2704500	2500700	3882200	1	2096700	3111100	2858900	3076200	1	2473200	13;1;1;1	13;1;1;1	13;1;1;1	sp|P42285|SK2L2_HUMAN Superkiller viralicidic activity 2-like 2 OS=Homo sapiens GN=SKIV2L2 PE=1 SV=3	4	13	13	13	6	6	6	0	4	5	6	2	0	6	6	6	6	0	4	5	6	2	0	6	6	6	6	0	4
sp|P62995|TRA2B_HUMAN;tr|H7BXF3|H7BXF3_HUMAN;tr|H7C2L4|H7C2L4_HUMAN	sp|P62995|TRA2B_HUMAN;tr|H7BXF3|H7BXF3_HUMAN;tr|H7C2L4|H7C2L4_HUMAN	1.14877	1.03616	0.592869	1.09661	0.861539	21517000	18363000	21455000	8030000	25379000	24718000	19027000	12720000	8805800	21865000	8;6;4	8;6;4	6;4;4	sp|P62995|TRA2B_HUMAN Transformer-2 protein homolog beta OS=Homo sapiens GN=TRA2B PE=1 SV=1;tr|H7BXF3|H7BXF3_HUMAN Transformer-2 protein homolog beta (Fragment) OS=Homo sapiens GN=TRA2B PE=1 SV=1;tr|H7C2L4|H7C2L4_HUMAN Transformer-2 protein homolog beta (F	3	8	8	6	5	6	6	2	6	6	7	3	3	5	5	6	6	2	6	6	7	3	3	5	5	5	6	2	5
sp|Q9Y2W1|TR150_HUMAN	sp|Q9Y2W1|TR150_HUMAN	1.03176	1.15677	1.06234	1.25419	1.07919	105800000	103720000	91574000	109800000	112260000	109160000	119980000	97283000	137710000	121150000	40	40	39	sp|Q9Y2W1|TR150_HUMAN Thyroid hormone receptor-associated protein 3 OS=Homo sapiens GN=THRAP3 PE=1 SV=2	1	40	40	39	26	26	28	23	28	25	24	24	23	27	26	26	28	23	28	25	24	24	23	27	25	25	27	22	27
sp|Q9BQ67|GRWD1_HUMAN;tr|M0QX71|M0QX71_HUMAN	sp|Q9BQ67|GRWD1_HUMAN	1.18305	1.317	0.972581	1.15518	1.05355	16471000	20606000	29359000	17373000	23005000	19486000	27138000	28554000	20069000	24237000	10;4	10;4	10;4	sp|Q9BQ67|GRWD1_HUMAN Glutamate-rich WD repeat-containing protein 1 OS=Homo sapiens GN=GRWD1 PE=1 SV=1	2	10	10	10	7	8	7	5	7	5	7	7	4	6	7	8	7	5	7	5	7	7	4	6	7	8	7	5	7
sp|P62269|RS18_HUMAN;tr|A0A0G2JQH2|A0A0G2JQH2_HUMAN;tr|Q5GGW2|Q5GGW2_HUMAN;tr|J3JS69|J3JS69_HUMAN	sp|P62269|RS18_HUMAN	1.14259	1.05117	0.556853	0.96843	0.697375	56392000	60089000	64218000	29902000	61330000	64433000	63164000	35760000	28958000	42770000	13;4;4;3	13;4;4;3	13;4;4;3	sp|P62269|RS18_HUMAN 40S ribosomal protein S18 OS=Homo sapiens GN=RPS18 PE=1 SV=3	4	13	13	13	9	8	8	6	11	8	7	8	6	8	9	8	8	6	11	8	7	8	6	8	9	8	8	6	11
sp|Q4G0J3|LARP7_HUMAN;tr|D6RFF0|D6RFF0_HUMAN;tr|H0YA82|H0YA82_HUMAN;tr|D6R9Z6|D6R9Z6_HUMAN;tr|D6RF49|D6RF49_HUMAN;tr|D6RAF3|D6RAF3_HUMAN;tr|D6RF22|D6RF22_HUMAN	sp|Q4G0J3|LARP7_HUMAN;tr|D6RFF0|D6RFF0_HUMAN;tr|H0YA82|H0YA82_HUMAN	1.14222	0.751341	1.01596	1	1784300	2274000	3282000	2130800	1	1	2597400	2465900	2164800	1	1784300	10;5;5;3;2;2;1	10;5;5;3;2;2;1	10;5;5;3;2;2;1	sp|Q4G0J3|LARP7_HUMAN La-related protein 7 OS=Homo sapiens GN=LARP7 PE=1 SV=1;tr|D6RFF0|D6RFF0_HUMAN La-related protein 7 (Fragment) OS=Homo sapiens GN=LARP7 PE=1 SV=1;tr|H0YA82|H0YA82_HUMAN La-related protein 7 (Fragment) OS=Homo sapiens GN=LARP7 PE=1 SV=	7	10	10	10	4	3	7	0	2	4	3	4	0	4	4	3	7	0	2	4	3	4	0	4	4	3	7	0	2
sp|Q14690|RRP5_HUMAN;tr|S4R3Q4|S4R3Q4_HUMAN	sp|Q14690|RRP5_HUMAN	1.28966	1.01274	0.975318	1.1005	1.09755	43316000	30698000	27591000	26616000	37078000	55863000	31089000	26910000	29291000	40695000	53;1	53;1	53;1	sp|Q14690|RRP5_HUMAN Protein RRP5 homolog OS=Homo sapiens GN=PDCD11 PE=1 SV=3	2	53	53	53	35	25	24	15	20	38	29	23	16	31	35	25	24	15	20	38	29	23	16	31	35	25	24	15	20
sp|P62979|RS27A_HUMAN;sp|P0CG48|UBC_HUMAN;tr|F5H265|F5H265_HUMAN;tr|Q96C32|Q96C32_HUMAN;sp|P0CG47|UBB_HUMAN;tr|Q5PY61|Q5PY61_HUMAN;tr|J3QKN0|J3QKN0_HUMAN;tr|F5GXK7|F5GXK7_HUMAN;tr|F5H747|F5H747_HUMAN;tr|B4DV12|B4DV12_HUMAN;tr|F5H388|F5H388_HUMAN;tr|F5H2Z3|F5H2Z3_HUMAN;tr|F5GYU3|F5GYU3_HUMAN;sp|P62987|RL40_HUMAN;tr|F5H6Q2|F5H6Q2_HUMAN;tr|J3QTR3|J3QTR3_HUMAN;tr|J3QS39|J3QS39_HUMAN;tr|M0R2S1|M0R2S1_…	sp|P62979|RS27A_HUMAN;sp|P0CG48|UBC_HUMAN;tr|F5H265|F5H265_HUMAN;tr|Q96C32|Q96C32_HUMAN;sp|P0CG47|UBB_HUMAN;tr|Q5PY61|Q5PY61_HUMAN;tr|J3QKN0|J3QKN0_HUMAN;tr|F5GXK7|F5GXK7_HUMAN;tr|F5H747|F5H747_HUMAN;tr|B4DV12|B4DV12_HUMAN;tr|F5H388|F5H388_HUMAN;tr|F5H2Z3|F5H2Z3_HUMAN;tr|F5GYU3|F5GYU3_HUMAN;sp|P62987|RL40_HUMAN;tr|F5H6Q2|F5H6Q2_HUMAN;tr|J3QTR3|J3QTR3_HUMAN;tr|J3QS39|J3QS39_HUMAN;tr|M0R2S1|M0R2S1_…	1.14193	0.934417	1.11785	1.33138	1.11408	25364000	27568000	23165000	16754000	27463000	28964000	25760000	25895000	22306000	30596000	5;4;4;4;4;4;4;4;4;4;4;4;4;4;4;4;4;3;3;3;3;3;2;2;2;1	5;4;4;4;4;4;4;4;4;4;4;4;4;4;4;4;4;3;3;3;3;3;2;2;2;1	5;4;4;4;4;4;4;4;4;4;4;4;4;4;4;4;4;3;3;3;3;3;2;2;2;1	sp|P62979|RS27A_HUMAN Ubiquitin-40S ribosomal protein S27a OS=Homo sapiens GN=RPS27A PE=1 SV=2;sp|P0CG48|UBC_HUMAN Polyubiquitin-C OS=Homo sapiens GN=UBC PE=1 SV=3;tr|F5H265|F5H265_HUMAN Polyubiquitin-C (Fragment) OS=Homo sapiens GN=UBC PE=1 SV=1;tr|Q96C32	26	5	5	5	5	3	4	2	2	2	2	3	1	3	5	3	4	2	2	2	2	3	1	3	5	3	4	2	2
sp|Q13838|DX39B_HUMAN;tr|Q5STU3|Q5STU3_HUMAN;tr|F6WLT2|F6WLT2_HUMAN;tr|A0A0G2JJZ9|A0A0G2JJZ9_HUMAN;tr|A0A0A0MT12|A0A0A0MT12_HUMAN;tr|F6TRA5|F6TRA5_HUMAN;tr|F6S4E6|F6S4E6_HUMAN;tr|F6UJC5|F6UJC5_HUMAN;tr|F6R6M7|F6R6M7_HUMAN;tr|F6QYI9|F6QYI9_HUMAN;tr|A0A0G2JJL7|A0A0G2JJL7_HUMAN;tr|A0A0G2JHN7|A0A0G2JHN7_HUMAN;tr|F6U6E2|F6U6E2_HUMAN;tr|F6S2B7|F6S2B7_HUMAN;tr|H0YCC6|H0YCC6_HUMAN;tr|H0Y400|H0Y400_HUMAN	sp|Q13838|DX39B_HUMAN;tr|Q5STU3|Q5STU3_HUMAN;tr|F6WLT2|F6WLT2_HUMAN;tr|A0A0G2JJZ9|A0A0G2JJZ9_HUMAN;tr|A0A0A0MT12|A0A0A0MT12_HUMAN;tr|F6TRA5|F6TRA5_HUMAN;tr|F6S4E6|F6S4E6_HUMAN;tr|F6UJC5|F6UJC5_HUMAN	1.31752	0.709048	1.43327	1.1125	1.1211	15158000	35975000	30542000	30409000	38546000	19971000	25508000	43775000	33830000	43214000	13;13;11;10;9;9;8;7;6;5;5;3;3;3;3;3	13;13;11;10;9;9;8;7;6;5;5;3;3;3;3;3	5;5;4;4;3;3;2;3;2;1;1;1;1;1;2;1	sp|Q13838|DX39B_HUMAN Spliceosome RNA helicase DDX39B OS=Homo sapiens GN=DDX39B PE=1 SV=1;tr|Q5STU3|Q5STU3_HUMAN Spliceosome RNA helicase DDX39B OS=Homo sapiens GN=DDX39B PE=1 SV=2;tr|F6WLT2|F6WLT2_HUMAN Spliceosome RNA helicase DDX39B (Fragment) OS=Homo s	16	13	13	5	5	8	10	6	9	4	10	7	7	7	5	8	10	6	9	4	10	7	7	7	1	3	3	1	4
sp|P18583|SON_HUMAN;tr|J3QSZ5|J3QSZ5_HUMAN;tr|H7C2G8|H7C2G8_HUMAN	sp|P18583|SON_HUMAN	0.947132	0.823475	1.52825	1.43076	1.02917	8078600	2828500	2709700	4066300	7095900	7651500	2329200	4141100	5817900	7302900	21;5;3	21;5;3	9;3;0	sp|P18583|SON_HUMAN Protein SON OS=Homo sapiens GN=SON PE=1 SV=4	3	21	21	9	13	4	4	3	9	9	3	5	4	8	13	4	4	3	9	9	3	5	4	8	4	3	2	1	5
sp|Q13547|HDAC1_HUMAN;tr|Q5TEE2|Q5TEE2_HUMAN	sp|Q13547|HDAC1_HUMAN;tr|Q5TEE2|Q5TEE2_HUMAN	1.13231	0.613064	1.11997	1	0.968877	1994500	3311400	2365500	1	2509400	2258400	2030100	2649300	1	2431300	6;5	6;5	3;2	sp|Q13547|HDAC1_HUMAN Histone deacetylase 1 OS=Homo sapiens GN=HDAC1 PE=1 SV=1;tr|Q5TEE2|Q5TEE2_HUMAN Histone deacetylase 1 (Fragment) OS=Homo sapiens GN=HDAC1 PE=1 SV=1	2	6	6	3	5	3	2	0	3	3	2	2	1	4	5	3	2	0	3	3	2	2	1	4	2	2	0	0	2
sp|Q03701|CEBPZ_HUMAN;tr|A0A087X1N2|A0A087X1N2_HUMAN;tr|C9J9W7|C9J9W7_HUMAN	sp|Q03701|CEBPZ_HUMAN;tr|A0A087X1N2|A0A087X1N2_HUMAN	1.35541	0.863642	0.925878	1.42414	1.14943	20641000	25015000	23070000	11303000	18156000	27977000	21604000	21360000	16097000	20869000	29;29;3	29;29;3	29;29;3	sp|Q03701|CEBPZ_HUMAN CCAAT/enhancer-binding protein zeta OS=Homo sapiens GN=CEBPZ PE=1 SV=3;tr|A0A087X1N2|A0A087X1N2_HUMAN CCAAT/enhancer-binding protein zeta OS=Homo sapiens GN=CEBPZ PE=1 SV=1	3	29	29	29	19	17	18	5	13	14	16	16	7	14	19	17	18	5	13	14	16	16	7	14	19	17	18	5	13
tr|J3KTA4|J3KTA4_HUMAN;sp|P17844|DDX5_HUMAN;tr|J3KRZ1|J3KRZ1_HUMAN;tr|J3QSF1|J3QSF1_HUMAN;tr|J3QRQ7|J3QRQ7_HUMAN;tr|J3KRX8|J3KRX8_HUMAN;tr|J3QRN5|J3QRN5_HUMAN;tr|J3QR02|J3QR02_HUMAN;tr|J3QLG9|J3QLG9_HUMAN;tr|J3QR62|J3QR62_HUMAN;tr|X6RLV5|X6RLV5_HUMAN	tr|J3KTA4|J3KTA4_HUMAN;sp|P17844|DDX5_HUMAN	1.12296	0.987222	1.06464	0.966072	1.37129	15289000	15652000	18441000	16771000	15465000	17169000	15452000	19633000	16202000	21207000	23;23;10;9;7;2;2;2;1;1;1	15;15;3;4;5;2;2;2;1;1;1	15;15;3;4;5;2;2;2;1;1;1	tr|J3KTA4|J3KTA4_HUMAN Probable ATP-dependent RNA helicase DDX5 OS=Homo sapiens GN=DDX5 PE=1 SV=1;sp|P17844|DDX5_HUMAN Probable ATP-dependent RNA helicase DDX5 OS=Homo sapiens GN=DDX5 PE=1 SV=1	11	23	15	15	15	11	15	8	10	14	17	14	10	11	9	7	10	6	6	10	12	10	6	8	9	7	10	6	6
tr|A0A087X0X3|A0A087X0X3_HUMAN;sp|P52272|HNRPM_HUMAN;tr|M0R019|M0R019_HUMAN;tr|M0R2T0|M0R2T0_HUMAN;tr|M0R0N3|M0R0N3_HUMAN;tr|M0QYQ7|M0QYQ7_HUMAN;tr|M0R0Y6|M0R0Y6_HUMAN;tr|M0R2I7|M0R2I7_HUMAN;tr|M0QY96|M0QY96_HUMAN;tr|M0QYL3|M0QYL3_HUMAN	tr|A0A087X0X3|A0A087X0X3_HUMAN;sp|P52272|HNRPM_HUMAN;tr|M0R019|M0R019_HUMAN;tr|M0R2T0|M0R2T0_HUMAN	1.19643	1.20672	0.902196	1.25867	0.975576	343430000	291410000	369720000	261030000	282510000	410890000	351650000	333560000	328550000	275610000	39;39;23;22;18;17;9;8;5;4	39;39;23;22;18;17;9;8;5;4	24;24;19;17;15;14;9;3;3;1	tr|A0A087X0X3|A0A087X0X3_HUMAN Heterogeneous nuclear ribonucleoprotein M OS=Homo sapiens GN=HNRNPM PE=1 SV=1;sp|P52272|HNRPM_HUMAN Heterogeneous nuclear ribonucleoprotein M OS=Homo sapiens GN=HNRNPM PE=1 SV=3;tr|M0R019|M0R019_HUMAN Heterogeneous nuclear ri	10	39	39	24	34	30	29	31	27	31	34	28	30	29	34	30	29	31	27	31	34	28	30	29	22	18	18	19	15
sp|Q9Y3B2|EXOS1_HUMAN;tr|B1AMU3|B1AMU3_HUMAN;tr|R4GNH9|R4GNH9_HUMAN;tr|R4GMQ7|R4GMQ7_HUMAN;tr|B1AMU7|B1AMU7_HUMAN;tr|B1AMU4|B1AMU4_HUMAN	sp|Q9Y3B2|EXOS1_HUMAN;tr|B1AMU3|B1AMU3_HUMAN;tr|R4GNH9|R4GNH9_HUMAN;tr|R4GMQ7|R4GMQ7_HUMAN;tr|B1AMU7|B1AMU7_HUMAN;tr|B1AMU4|B1AMU4_HUMAN	1.12091	0.850842	1.03288	1	5.82038e-07	2960900	3283100	3381600	1	1718100	3318900	2793400	3492800	1	1	4;3;2;2;2;2	4;3;2;2;2;2	4;3;2;2;2;2	sp|Q9Y3B2|EXOS1_HUMAN Exosome complex component CSL4 OS=Homo sapiens GN=EXOSC1 PE=1 SV=1;tr|B1AMU3|B1AMU3_HUMAN Exosome complex component CSL4 OS=Homo sapiens GN=EXOSC1 PE=1 SV=1;tr|R4GNH9|R4GNH9_HUMAN Exosome complex component CSL4 OS=Homo sapiens GN=EXOS	6	4	4	4	2	2	3	1	2	3	3	3	2	1	2	2	3	1	2	3	3	3	2	1	2	2	3	1	2
sp|Q96A72|MGN2_HUMAN;tr|F5H6N1|F5H6N1_HUMAN;tr|F5H124|F5H124_HUMAN	sp|Q96A72|MGN2_HUMAN;tr|F5H6N1|F5H6N1_HUMAN	0.819172	0.771143	1.52865	1.16918	1.24891	11068000	11661000	9919200	10616000	10771000	9066600	8992300	15163000	12412000	13452000	9;6;1	9;6;1	1;1;1	sp|Q96A72|MGN2_HUMAN Protein mago nashi homolog 2 OS=Homo sapiens GN=MAGOHB PE=1 SV=1;tr|F5H6N1|F5H6N1_HUMAN Protein mago nashi homolog 2 OS=Homo sapiens GN=MAGOHB PE=1 SV=1	3	9	9	1	3	6	5	5	5	6	5	4	4	9	3	6	5	5	5	6	5	4	4	9	0	0	0	0	0
tr|J3QT28|J3QT28_HUMAN;sp|O43684|BUB3_HUMAN	tr|J3QT28|J3QT28_HUMAN;sp|O43684|BUB3_HUMAN	1.11064	1016100	1115500	1	1065600	1075600	1	1	1	1	1194600	1016100	1115500	1	1065600	3;3	3;3	3;3	tr|J3QT28|J3QT28_HUMAN Mitotic checkpoint protein BUB3 (Fragment) OS=Homo sapiens GN=BUB3 PE=1 SV=1;sp|O43684|BUB3_HUMAN Mitotic checkpoint protein BUB3 OS=Homo sapiens GN=BUB3 PE=1 SV=1	2	3	3	3	3	1	1	0	1	2	3	2	0	2	3	1	1	0	1	2	3	2	0	2	3	1	1	0	1
sp|Q07065|CKAP4_HUMAN	sp|Q07065|CKAP4_HUMAN	1.11012	0.964275	0.722308	1	0.84781	3235600	3582900	3221200	1	3223600	3591900	3454900	2326700	1	2733000	13	13	13	sp|Q07065|CKAP4_HUMAN Cytoskeleton-associated protein 4 OS=Homo sapiens GN=CKAP4 PE=1 SV=2	1	13	13	13	6	6	8	0	4	7	11	3	0	4	6	6	8	0	4	7	11	3	0	4	6	6	8	0	4
sp|P19338|NUCL_HUMAN;tr|H7BY16|H7BY16_HUMAN	sp|P19338|NUCL_HUMAN;tr|H7BY16|H7BY16_HUMAN	1.26926	0.980342	1.13502	0.880207	1.19629	16378000	19331000	14902000	13323000	11269000	20788000	18951000	16914000	11727000	13481000	17;12	17;12	17;12	sp|P19338|NUCL_HUMAN Nucleolin OS=Homo sapiens GN=NCL PE=1 SV=3;tr|H7BY16|H7BY16_HUMAN Nucleolin (Fragment) OS=Homo sapiens GN=NCL PE=1 SV=5	2	17	17	17	11	11	8	8	7	10	12	10	5	9	11	11	8	8	7	10	12	10	5	9	11	11	8	8	7
sp|Q9BQI3|E2AK1_HUMAN;tr|J3QQT8|J3QQT8_HUMAN;tr|B1ALA7|B1ALA7_HUMAN	sp|Q9BQI3|E2AK1_HUMAN	1.10845	0.851852	9.01144e-07	1	1515800	1187600	1225800	1109700	1	1	1316400	1044200	1	1	1515800	6;1;1	6;1;1	6;1;1	sp|Q9BQI3|E2AK1_HUMAN Eukaryotic translation initiation factor 2-alpha kinase 1 OS=Homo sapiens GN=EIF2AK1 PE=1 SV=2	3	6	6	6	2	2	3	0	0	3	4	1	0	3	2	2	3	0	0	3	4	1	0	3	2	2	3	0	0
sp|Q9BWF3|RBM4_HUMAN;tr|E9PB51|E9PB51_HUMAN;sp|Q9BQ04|RBM4B_HUMAN;tr|E9PLB0|E9PLB0_HUMAN;tr|E9PM61|E9PM61_HUMAN;tr|D6R9K7|D6R9K7_HUMAN;tr|U3KQD5|U3KQD5_HUMAN;tr|J3QRR5|J3QRR5_HUMAN	sp|Q9BWF3|RBM4_HUMAN;tr|E9PB51|E9PB51_HUMAN;sp|Q9BQ04|RBM4B_HUMAN;tr|E9PLB0|E9PLB0_HUMAN;tr|E9PM61|E9PM61_HUMAN;tr|D6R9K7|D6R9K7_HUMAN;tr|U3KQD5|U3KQD5_HUMAN;tr|J3QRR5|J3QRR5_HUMAN	1.10839	0.711237	0.747927	0.868665	0.684519	6120300	8940200	7620400	5078600	6871100	6783700	6358600	5699500	4411600	4703400	12;11;9;6;6;6;6;6	12;11;9;6;6;6;6;6	12;11;9;6;6;6;6;6	sp|Q9BWF3|RBM4_HUMAN RNA-binding protein 4 OS=Homo sapiens GN=RBM4 PE=1 SV=1;tr|E9PB51|E9PB51_HUMAN RNA-binding protein 4 (Fragment) OS=Homo sapiens GN=RBM4 PE=1 SV=1;sp|Q9BQ04|RBM4B_HUMAN RNA-binding protein 4B OS=Homo sapiens GN=RBM4B PE=1 SV=1;tr|E9PLB0	8	12	12	12	5	9	9	4	5	7	6	5	4	4	5	9	9	4	5	7	6	5	4	4	5	9	9	4	5
sp|Q9H0S4|DDX47_HUMAN;tr|F5H1N9|F5H1N9_HUMAN	sp|Q9H0S4|DDX47_HUMAN;tr|F5H1N9|F5H1N9_HUMAN	0.839217	0.747241	1.21058	1.82074	1.16655	6504400	5880700	5116400	3535100	5167800	5458600	4394300	6193800	6436500	6028500	13;7	13;7	13;7	sp|Q9H0S4|DDX47_HUMAN Probable ATP-dependent RNA helicase DDX47 OS=Homo sapiens GN=DDX47 PE=1 SV=1;tr|F5H1N9|F5H1N9_HUMAN Probable ATP-dependent RNA helicase DDX47 (Fragment) OS=Homo sapiens GN=DDX47 PE=1 SV=1	2	13	13	13	6	7	5	2	5	4	4	4	2	6	6	7	5	2	5	4	4	4	2	6	6	7	5	2	5
sp|P55265|DSRAD_HUMAN;tr|H0YCK3|H0YCK3_HUMAN	sp|P55265|DSRAD_HUMAN;tr|H0YCK3|H0YCK3_HUMAN	0.870649	1.28651	0.769167	3.24947	1.48016	24422000	12642000	19291000	2464800	8772000	21263000	16264000	14838000	8009300	12984000	26;24	26;24	26;24	sp|P55265|DSRAD_HUMAN Double-stranded RNA-specific adenosine deaminase OS=Homo sapiens GN=ADAR PE=1 SV=4;tr|H0YCK3|H0YCK3_HUMAN Double-stranded RNA-specific adenosine deaminase (Fragment) OS=Homo sapiens GN=ADAR PE=1 SV=1	2	26	26	26	18	14	15	5	7	18	14	12	6	12	18	14	15	5	7	18	14	12	6	12	18	14	15	5	7
sp|P54132|BLM_HUMAN;tr|H0YNU5|H0YNU5_HUMAN;tr|H0YLV8|H0YLV8_HUMAN	sp|P54132|BLM_HUMAN;tr|H0YNU5|H0YNU5_HUMAN	1.08323	0.749994	0.748107	2453100	1.08728	3588700	4096300	3249000	1	2881400	3887400	3072200	2430600	2453100	3132900	16;16;4	16;16;4	16;16;4	sp|P54132|BLM_HUMAN Bloom syndrome protein OS=Homo sapiens GN=BLM PE=1 SV=1;tr|H0YNU5|H0YNU5_HUMAN Bloom syndrome protein OS=Homo sapiens GN=BLM PE=1 SV=1	3	16	16	16	7	7	7	0	4	5	5	5	2	3	7	7	7	0	4	5	5	5	2	3	7	7	7	0	4
sp|P16989|YBOX3_HUMAN;tr|A0A0D9SEI8|A0A0D9SEI8_HUMAN	sp|P16989|YBOX3_HUMAN	1.09502	1.58951	0.825291	1	1.0732	3520200	3976500	4729000	1	4915300	3854700	6320700	3902800	1	5275100	15;4	9;1	9;1	sp|P16989|YBOX3_HUMAN Y-box-binding protein 3 OS=Homo sapiens GN=YBX3 PE=1 SV=4	2	15	9	9	8	9	8	5	7	11	11	9	4	11	3	6	5	1	2	5	7	5	1	5	3	6	5	1	2
sp|Q9Y657|SPIN1_HUMAN	sp|Q9Y657|SPIN1_HUMAN	0.891737	1.25301	1.45639	0.848025	0.950391	15721000	15711000	16337000	16029000	14977000	14019000	19686000	23793000	13593000	14234000	13	13	9	sp|Q9Y657|SPIN1_HUMAN Spindlin-1 OS=Homo sapiens GN=SPIN1 PE=1 SV=3	1	13	13	9	7	7	8	4	5	6	8	8	6	7	7	7	8	4	5	6	8	8	6	7	5	4	6	4	4
sp|P62829|RL23_HUMAN;tr|C9JD32|C9JD32_HUMAN;tr|J3KT29|J3KT29_HUMAN;tr|B9ZVP7|B9ZVP7_HUMAN;tr|J3KTJ3|J3KTJ3_HUMAN	sp|P62829|RL23_HUMAN;tr|C9JD32|C9JD32_HUMAN;tr|J3KT29|J3KT29_HUMAN;tr|B9ZVP7|B9ZVP7_HUMAN	0.742811	1.19033	1.02322	1.26888	1.44514	49310000	24337000	37862000	28920000	24033000	36628000	28969000	38741000	36696000	34731000	7;6;6;4;3	7;6;6;4;3	5;4;4;4;1	sp|P62829|RL23_HUMAN 60S ribosomal protein L23 OS=Homo sapiens GN=RPL23 PE=1 SV=1;tr|C9JD32|C9JD32_HUMAN 60S ribosomal protein L23 (Fragment) OS=Homo sapiens GN=RPL23 PE=1 SV=1;tr|J3KT29|J3KT29_HUMAN 60S ribosomal protein L23 OS=Homo sapiens GN=RPL23 PE=1	5	7	7	5	2	3	6	3	4	6	5	6	6	4	2	3	6	3	4	6	5	6	6	4	2	2	4	3	2
sp|Q6NW34|CC017_HUMAN;tr|E9PFF8|E9PFF8_HUMAN	sp|Q6NW34|CC017_HUMAN;tr|E9PFF8|E9PFF8_HUMAN	1.09038	1.37997	7.66342e-07	1	1534500	1632000	1155100	1304900	1	1	1779500	1594000	1	1	1534500	4;2	4;2	4;2	sp|Q6NW34|CC017_HUMAN Uncharacterized protein C3orf17 OS=Homo sapiens GN=C3orf17 PE=1 SV=3;tr|E9PFF8|E9PFF8_HUMAN Uncharacterized protein C3orf17 OS=Homo sapiens GN=C3orf17 PE=1 SV=1	2	4	4	4	3	2	3	1	1	4	2	1	1	3	3	2	3	1	1	4	2	1	1	3	3	2	3	1	1
tr|G5EA29|G5EA29_HUMAN;tr|H0YDP6|H0YDP6_HUMAN;tr|H0YEL0|H0YEL0_HUMAN	tr|G5EA29|G5EA29_HUMAN	1.08988	1.00765	1.01146	0.579976	1.02786	21228000	21046000	24958000	19137000	18305000	23136000	21207000	25244000	11099000	18815000	14;1;1	14;1;1	0;0;0	tr|G5EA29|G5EA29_HUMAN Gem-associated protein 2 OS=Homo sapiens GN=GEMIN2 PE=1 SV=1	3	14	14	0	9	9	6	5	8	7	7	9	5	7	9	9	6	5	8	7	7	9	5	7	0	0	0	0	0
sp|P84090|ERH_HUMAN;tr|G3V279|G3V279_HUMAN	sp|P84090|ERH_HUMAN;tr|G3V279|G3V279_HUMAN	0.759463	0.943935	1.49342	0.790944	2.83507	175690000	140550000	119370000	226160000	46856000	133430000	132670000	178270000	178880000	132840000	6;4	6;4	6;4	sp|P84090|ERH_HUMAN Enhancer of rudimentary homolog OS=Homo sapiens GN=ERH PE=1 SV=1;tr|G3V279|G3V279_HUMAN Enhancer of rudimentary homolog OS=Homo sapiens GN=ERH PE=1 SV=1	2	6	6	6	6	6	6	6	5	6	5	4	5	6	6	6	6	6	5	6	5	4	5	6	6	6	6	6	5
sp|Q9UH99|SUN2_HUMAN;tr|B0QY64|B0QY64_HUMAN;tr|H0Y686|H0Y686_HUMAN;tr|B0QY60|B0QY60_HUMAN;tr|B0QY63|B0QY63_HUMAN;tr|B0QY68|B0QY68_HUMAN;tr|B0QY66|B0QY66_HUMAN;tr|B0QY67|B0QY67_HUMAN	sp|Q9UH99|SUN2_HUMAN	1.08792	1.59779	0.946653	1	1.38722	2946000	3025300	3068600	1	2324800	3205000	4833800	2904900	1	3225000	10;3;2;2;2;1;1;1	10;3;2;2;2;1;1;1	10;3;2;2;2;1;1;1	sp|Q9UH99|SUN2_HUMAN SUN domain-containing protein 2 OS=Homo sapiens GN=SUN2 PE=1 SV=3	8	10	10	10	4	5	5	1	3	2	6	3	1	4	4	5	5	1	3	2	6	3	1	4	4	5	5	1	3
sp|Q14498|RBM39_HUMAN;tr|H0Y4X3|H0Y4X3_HUMAN;tr|G3XAC6|G3XAC6_HUMAN;tr|H0YJJ3|H0YJJ3_HUMAN;tr|Q5QP23|Q5QP23_HUMAN;sp|Q86U06|RBM23_HUMAN;tr|G3V5Z6|G3V5Z6_HUMAN;tr|G3XAP0|G3XAP0_HUMAN;tr|A0A087X122|A0A087X122_HUMAN;tr|G3V546|G3V546_HUMAN;tr|Q5QP22|Q5QP22_HUMAN	sp|Q14498|RBM39_HUMAN;tr|H0Y4X3|H0Y4X3_HUMAN;tr|G3XAC6|G3XAC6_HUMAN	1.08762	0.615344	1.01298	0.895428	0.644295	8640300	10115000	9477400	7605300	10324000	9397400	6224200	9600400	6810000	6651700	11;10;9;2;2;2;2;2;1;1;1	11;10;9;2;2;2;2;2;1;1;1	11;10;9;2;2;2;2;2;1;1;1	sp|Q14498|RBM39_HUMAN RNA-binding protein 39 OS=Homo sapiens GN=RBM39 PE=1 SV=2;tr|H0Y4X3|H0Y4X3_HUMAN RNA-binding protein 39 (Fragment) OS=Homo sapiens GN=RBM39 PE=1 SV=5;tr|G3XAC6|G3XAC6_HUMAN RNA-binding protein 39 OS=Homo sapiens GN=RBM39 PE=1 SV=1	11	11	11	11	7	7	5	3	6	6	5	4	3	4	7	7	5	3	6	6	5	4	3	4	7	7	5	3	6
sp|Q01780|EXOSX_HUMAN;tr|K7EJ37|K7EJ37_HUMAN	sp|Q01780|EXOSX_HUMAN	1.08621	0.906453	1.13478	1.16753	1.08719	23780000	27152000	26546000	15251000	19956000	25830000	24612000	30124000	17806000	21696000	33;5	33;5	33;5	sp|Q01780|EXOSX_HUMAN Exosome component 10 OS=Homo sapiens GN=EXOSC10 PE=1 SV=2	2	33	33	33	20	19	19	9	15	19	19	20	11	15	20	19	19	9	15	19	19	20	11	15	20	19	19	9	15
sp|Q15208|STK38_HUMAN	sp|Q15208|STK38_HUMAN	1.44929	1.28628	1.11387	0.81572	0.823461	18489000	25929000	21876000	31653000	25796000	26796000	33352000	24367000	25820000	21242000	17	17	15	sp|Q15208|STK38_HUMAN Serine/threonine-protein kinase 38 OS=Homo sapiens GN=STK38 PE=1 SV=1	1	17	17	15	10	7	11	7	7	11	10	7	7	11	10	7	11	7	7	11	10	7	7	11	9	6	10	6	6
sp|Q9Y3B9|RRP15_HUMAN	sp|Q9Y3B9|RRP15_HUMAN	1.18932	0.962712	0.918224	0.904935	1.35399	17521000	14911000	15897000	16736000	13876000	20838000	14355000	14597000	15145000	18788000	11	11	11	sp|Q9Y3B9|RRP15_HUMAN RRP15-like protein OS=Homo sapiens GN=RRP15 PE=1 SV=2	1	11	11	11	9	5	5	3	6	8	6	5	3	6	9	5	5	3	6	8	6	5	3	6	9	5	5	3	6
sp|Q1ED39|KNOP1_HUMAN;tr|H3BNU8|H3BNU8_HUMAN;tr|H3BPL4|H3BPL4_HUMAN;tr|H3BMC9|H3BMC9_HUMAN	sp|Q1ED39|KNOP1_HUMAN;tr|H3BNU8|H3BNU8_HUMAN	1.08511	1.17736	5.62778e-07	1	0.974539	2348700	1912500	1776900	1	1779200	2548600	2251700	1	1	1733900	8;4;2;1	8;4;2;1	8;4;2;1	sp|Q1ED39|KNOP1_HUMAN Lysine-rich nucleolar protein 1 OS=Homo sapiens GN=KNOP1 PE=1 SV=1;tr|H3BNU8|H3BNU8_HUMAN Lysine-rich nucleolar protein 1 OS=Homo sapiens GN=KNOP1 PE=1 SV=1	4	8	8	8	5	4	5	0	2	5	3	1	1	2	5	4	5	0	2	5	3	1	1	2	5	4	5	0	2
tr|A0A087WV66|A0A087WV66_HUMAN;sp|P46013|KI67_HUMAN	tr|A0A087WV66|A0A087WV66_HUMAN;sp|P46013|KI67_HUMAN	1.08501	0.925459	1.1248	1	1.08063	8663700	8294800	6871700	1	5973000	9400200	7676500	7729300	1	6454600	25;25	25;25	25;25	tr|A0A087WV66|A0A087WV66_HUMAN Antigen KI-67 OS=Homo sapiens GN=MKI67 PE=1 SV=1;sp|P46013|KI67_HUMAN Antigen KI-67 OS=Homo sapiens GN=MKI67 PE=1 SV=2	2	25	25	25	12	11	14	0	9	16	11	11	0	8	12	11	14	0	9	16	11	11	0	8	12	11	14	0	9
tr|A0A087X1A5|A0A087X1A5_HUMAN;tr|Q5JW30|Q5JW30_HUMAN;sp|O95793|STAU1_HUMAN;tr|F6UDC6|F6UDC6_HUMAN	tr|A0A087X1A5|A0A087X1A5_HUMAN;tr|Q5JW30|Q5JW30_HUMAN;sp|O95793|STAU1_HUMAN	1.08409	0.843204	0.812801	1	0.86542	3689100	3373800	3576400	1	3609000	3999300	2844800	2906900	1	3123300	11;11;11;1	9;9;9;1	5;5;5;0	tr|A0A087X1A5|A0A087X1A5_HUMAN Double-stranded RNA-binding protein Staufen homolog 1 OS=Homo sapiens GN=STAU1 PE=1 SV=1;tr|Q5JW30|Q5JW30_HUMAN Double-stranded RNA-binding protein Staufen homolog 1 OS=Homo sapiens GN=STAU1 PE=1 SV=1;sp|O95793|STAU1_HUMAN Do	4	11	9	5	7	6	7	0	3	5	5	5	1	2	6	6	6	0	3	5	5	5	1	2	2	3	2	0	1
sp|P49790|NU153_HUMAN	sp|P49790|NU153_HUMAN	1.0835	0.718519	0.72877	1	1	2002300	2403000	2222100	1	1	2169500	1726600	1619400	1	1	9	9	9	sp|P49790|NU153_HUMAN Nuclear pore complex protein Nup153 OS=Homo sapiens GN=NUP153 PE=1 SV=2	1	9	9	9	5	7	5	0	1	6	3	2	0	0	5	7	5	0	1	6	3	2	0	0	5	7	5	0	1
sp|Q15717|ELAV1_HUMAN;tr|M0QZR9|M0QZR9_HUMAN;tr|M0R055|M0R055_HUMAN	sp|Q15717|ELAV1_HUMAN;tr|M0QZR9|M0QZR9_HUMAN	1.27486	1.05786	1.20978	0.894143	0.865379	5776800	5967700	5630600	3698400	7798200	7364600	6313000	6811800	3306900	6748400	9;5;2	9;5;2	9;5;2	sp|Q15717|ELAV1_HUMAN ELAV-like protein 1 OS=Homo sapiens GN=ELAVL1 PE=1 SV=2;tr|M0QZR9|M0QZR9_HUMAN ELAV-like protein 1 OS=Homo sapiens GN=ELAVL1 PE=1 SV=1	3	9	9	9	5	6	5	2	6	5	7	6	2	6	5	6	5	2	6	5	7	6	2	6	5	6	5	2	6
sp|Q9Y5S9|RBM8A_HUMAN;tr|H3BU74|H3BU74_HUMAN;tr|A0A087X0Z4|A0A087X0Z4_HUMAN;tr|B4DTX8|B4DTX8_HUMAN;tr|A0A087WSX4|A0A087WSX4_HUMAN;tr|Q5T0C8|Q5T0C8_HUMAN;sp|Q6ZNA4|RN111_HUMAN	sp|Q9Y5S9|RBM8A_HUMAN	1.0623	0.849575	1.46133	1.05115	0.938231	9902100	11290000	9015100	9397700	11365000	10519000	9591700	13174000	9878400	10663000	11;3;3;2;2;1;1	11;3;3;2;2;1;1	8;1;1;0;1;0;0	sp|Q9Y5S9|RBM8A_HUMAN RNA-binding protein 8A OS=Homo sapiens GN=RBM8A PE=1 SV=1	7	11	11	8	8	7	6	4	5	8	7	5	4	6	8	7	6	4	5	8	7	5	4	6	5	5	4	4	4
sp|P62241|RS8_HUMAN;tr|Q5JR95|Q5JR95_HUMAN	sp|P62241|RS8_HUMAN;tr|Q5JR95|Q5JR95_HUMAN	1.08144	0.977477	0.6532	0.799843	0.830736	215630000	251300000	266840000	127700000	174520000	233190000	245640000	174300000	102140000	144980000	13;12	13;12	13;12	sp|P62241|RS8_HUMAN 40S ribosomal protein S8 OS=Homo sapiens GN=RPS8 PE=1 SV=2;tr|Q5JR95|Q5JR95_HUMAN 40S ribosomal protein S8 OS=Homo sapiens GN=RPS8 PE=1 SV=1	2	13	13	13	10	10	10	9	6	11	10	8	8	7	10	10	10	9	6	11	10	8	8	7	10	10	10	9	6
sp|Q13206|DDX10_HUMAN;tr|E9PIF2|E9PIF2_HUMAN	sp|Q13206|DDX10_HUMAN;tr|E9PIF2|E9PIF2_HUMAN	1.08111	0.645379	1.01704	0.459042	1.23494	6706600	4548800	4988400	4807400	6574900	7250600	2935700	5073400	2206800	8119600	22;21	22;21	22;21	sp|Q13206|DDX10_HUMAN Probable ATP-dependent RNA helicase DDX10 OS=Homo sapiens GN=DDX10 PE=1 SV=2;tr|E9PIF2|E9PIF2_HUMAN Probable ATP-dependent RNA helicase DDX10 OS=Homo sapiens GN=DDX10 PE=1 SV=1	2	22	22	22	8	6	6	4	10	11	4	7	2	14	8	6	6	4	10	11	4	7	2	14	8	6	6	4	10
sp|Q9Y5Q9|TF3C3_HUMAN;tr|H7C0C0|H7C0C0_HUMAN	sp|Q9Y5Q9|TF3C3_HUMAN	1.07977	7.97575e-07	1	1	1	1335100	1253800	1	1	1	1441600	1	1	1	1	4;1	4;1	4;1	sp|Q9Y5Q9|TF3C3_HUMAN General transcription factor 3C polypeptide 3 OS=Homo sapiens GN=GTF3C3 PE=1 SV=1	2	4	4	4	3	3	1	0	1	2	1	1	0	0	3	3	1	0	1	2	1	1	0	0	3	3	1	0	1
sp|Q9BUQ8|DDX23_HUMAN;tr|H0YI52|H0YI52_HUMAN;tr|F8VVA2|F8VVA2_HUMAN	sp|Q9BUQ8|DDX23_HUMAN	1.0758	0.783836	1.14024	1	7.8796e-07	2189900	2365800	2518600	1	1269100	2355900	1854400	2871800	1	1	11;1;1	11;1;1	11;1;1	sp|Q9BUQ8|DDX23_HUMAN Probable ATP-dependent RNA helicase DDX23 OS=Homo sapiens GN=DDX23 PE=1 SV=3	3	11	11	11	3	5	3	0	2	7	4	4	0	0	3	5	3	0	2	7	4	4	0	0	3	5	3	0	2
sp|Q9Y295|DRG1_HUMAN;tr|H0YI06|H0YI06_HUMAN	sp|Q9Y295|DRG1_HUMAN	1.06838	0.68556	0.835395	1	0.740931	1327800	1939000	1648800	1	1689900	1418600	1329300	1377400	1	1252100	5;1	5;1	5;1	sp|Q9Y295|DRG1_HUMAN Developmentally-regulated GTP-binding protein 1 OS=Homo sapiens GN=DRG1 PE=1 SV=1	2	5	5	5	2	3	3	0	3	2	4	2	0	2	2	3	3	0	3	2	4	2	0	2	2	3	3	0	3
sp|P02545|LMNA_HUMAN;tr|Q3BDU5|Q3BDU5_HUMAN;tr|Q5TCI8|Q5TCI8_HUMAN;tr|H0YAB0|H0YAB0_HUMAN;tr|A0A0C4DGC5|A0A0C4DGC5_HUMAN	sp|P02545|LMNA_HUMAN;tr|Q3BDU5|Q3BDU5_HUMAN;tr|Q5TCI8|Q5TCI8_HUMAN	1.06675	0.722448	2500300	1	0.62586	2536500	3180300	1	1	2529800	2705800	2297600	2500300	1	1583300	15;13;10;4;3	14;12;9;4;2	14;12;9;4;2	sp|P02545|LMNA_HUMAN Prelamin-A/C OS=Homo sapiens GN=LMNA PE=1 SV=1;tr|Q3BDU5|Q3BDU5_HUMAN Prelamin-A/C OS=Homo sapiens GN=LMNA PE=1 SV=1;tr|Q5TCI8|Q5TCI8_HUMAN Prelamin-A/C OS=Homo sapiens GN=LMNA PE=1 SV=1	5	15	14	14	4	7	3	2	5	5	3	3	0	4	3	7	3	1	4	4	3	3	0	4	3	7	3	1	4
sp|Q9H0A0|NAT10_HUMAN;tr|A0A087WV29|A0A087WV29_HUMAN;tr|E9PMU0|E9PMU0_HUMAN;tr|E9PJN6|E9PJN6_HUMAN	sp|Q9H0A0|NAT10_HUMAN;tr|A0A087WV29|A0A087WV29_HUMAN	1.27741	1.07529	0.893303	1.10518	0.933663	8546200	6257000	7971200	3571100	7594500	10917000	6728100	7120700	3946700	7090700	23;19;4;3	23;19;4;3	23;19;4;3	sp|Q9H0A0|NAT10_HUMAN N-acetyltransferase 10 OS=Homo sapiens GN=NAT10 PE=1 SV=2;tr|A0A087WV29|A0A087WV29_HUMAN N-acetyltransferase 10 OS=Homo sapiens GN=NAT10 PE=1 SV=1	4	23	23	23	9	8	13	3	7	9	7	7	3	9	9	8	13	3	7	9	7	7	3	9	9	8	13	3	7
sp|P52597|HNRPF_HUMAN	sp|P52597|HNRPF_HUMAN	1.71755	0.988961	1.10715	0.819003	0.71608	23218000	26996000	22978000	20028000	30336000	39878000	26698000	25440000	16403000	21723000	11	9	9	sp|P52597|HNRPF_HUMAN Heterogeneous nuclear ribonucleoprotein F OS=Homo sapiens GN=HNRNPF PE=1 SV=3	1	11	9	9	10	8	11	6	9	8	9	10	7	8	8	7	9	4	7	6	7	8	5	6	8	7	9	4	7
sp|Q14684|RRP1B_HUMAN	sp|Q14684|RRP1B_HUMAN	1.19164	1.07192	0.952593	1.07626	0.952813	22135000	21510000	24722000	16261000	19306000	26377000	23057000	23550000	17501000	18395000	21	21	21	sp|Q14684|RRP1B_HUMAN Ribosomal RNA processing protein 1 homolog B OS=Homo sapiens GN=RRP1B PE=1 SV=3	1	21	21	21	12	11	14	8	7	13	12	14	7	11	12	11	14	8	7	13	12	14	7	11	12	11	14	8	7
sp|Q9NR30|DDX21_HUMAN	sp|Q9NR30|DDX21_HUMAN	1.17287	1.06946	0.94519	0.963596	1.03071	104240000	90986000	82010000	77190000	83072000	122260000	97306000	77515000	74380000	85623000	39	39	37	sp|Q9NR30|DDX21_HUMAN Nucleolar RNA helicase 2 OS=Homo sapiens GN=DDX21 PE=1 SV=5	1	39	39	37	23	22	23	20	22	21	23	23	15	24	23	22	23	20	22	21	23	23	15	24	22	20	22	19	21
sp|Q9Y3A4|RRP7A_HUMAN;sp|Q9NSQ0|RRP7B_HUMAN	sp|Q9Y3A4|RRP7A_HUMAN	1.061	0.944095	0.720541	1	1.45923	2914600	2513200	3425900	1	1831100	3092400	2372700	2468500	1	2672000	8;1	8;1	8;1	sp|Q9Y3A4|RRP7A_HUMAN Ribosomal RNA-processing protein 7 homolog A OS=Homo sapiens GN=RRP7A PE=1 SV=2	2	8	8	8	4	3	4	0	2	4	5	2	0	1	4	3	4	0	2	4	5	2	0	1	4	3	4	0	2
sp|Q9Y4W2|LAS1L_HUMAN	sp|Q9Y4W2|LAS1L_HUMAN	0.898178	1.09601	1.19571	0.840281	1.22736	18660000	11697000	13505000	11045000	12377000	16760000	12820000	16148000	9280900	15191000	15	15	15	sp|Q9Y4W2|LAS1L_HUMAN Ribosomal biogenesis protein LAS1L OS=Homo sapiens GN=LAS1L PE=1 SV=2	1	15	15	15	6	7	7	3	8	5	10	8	3	11	6	7	7	3	8	5	10	8	3	11	6	7	7	3	8
sp|O43395|PRPF3_HUMAN	sp|O43395|PRPF3_HUMAN	1.0578	1	1	1	1	660010	1	1	1	1	698160	1	1	1	1	3	3	3	sp|O43395|PRPF3_HUMAN U4/U6 small nuclear ribonucleoprotein Prp3 OS=Homo sapiens GN=PRPF3 PE=1 SV=2	1	3	3	3	2	0	0	0	0	2	0	1	0	0	2	0	0	0	0	2	0	1	0	0	2	0	0	0	0
sp|O00567|NOP56_HUMAN;tr|H0YDU4|H0YDU4_HUMAN;tr|Q5JXT2|Q5JXT2_HUMAN;tr|H0Y653|H0Y653_HUMAN	sp|O00567|NOP56_HUMAN	1.36377	0.868257	0.867345	1.01108	1.14754	56219000	63768000	64905000	46759000	53470000	76670000	55367000	56295000	47277000	61359000	30;13;12;11	30;13;12;11	30;13;12;11	sp|O00567|NOP56_HUMAN Nucleolar protein 56 OS=Homo sapiens GN=NOP56 PE=1 SV=4	4	30	30	30	20	20	20	14	13	24	24	18	17	15	20	20	20	14	13	24	24	18	17	15	20	20	20	14	13
sp|Q9NQT5|EXOS3_HUMAN	sp|Q9NQT5|EXOS3_HUMAN	1.05569	1.03018	0.847278	1	3120400	5539300	4105900	4325500	1	1	5847800	4229800	3664900	1	3120400	6	6	6	sp|Q9NQT5|EXOS3_HUMAN Exosome complex component RRP40 OS=Homo sapiens GN=EXOSC3 PE=1 SV=3	1	6	6	6	3	3	3	2	0	3	4	2	0	5	3	3	3	2	0	3	4	2	0	5	3	3	3	2	0
sp|P22626|ROA2_HUMAN;tr|A0A087WUI2|A0A087WUI2_HUMAN	sp|P22626|ROA2_HUMAN;tr|A0A087WUI2|A0A087WUI2_HUMAN	1.05138	1.03199	1.80916	0.555821	1.57097	8265500	9364100	8846100	7069000	6616300	8690200	9663700	16004000	3929100	10394000	14;11	14;11	13;10	sp|P22626|ROA2_HUMAN Heterogeneous nuclear ribonucleoproteins A2/B1 OS=Homo sapiens GN=HNRNPA2B1 PE=1 SV=2;tr|A0A087WUI2|A0A087WUI2_HUMAN Heterogeneous nuclear ribonucleoproteins A2/B1 OS=Homo sapiens GN=HNRNPA2B1 PE=1 SV=1	2	14	14	13	5	9	5	5	6	8	7	9	3	8	5	9	5	5	6	8	7	9	3	8	5	9	5	5	6
sp|P62750|RL23A_HUMAN;tr|H7BY10|H7BY10_HUMAN;tr|K7EJV9|K7EJV9_HUMAN;tr|K7ERT8|K7ERT8_HUMAN;tr|A8MUS3|A8MUS3_HUMAN;tr|K7EMA7|K7EMA7_HUMAN	sp|P62750|RL23A_HUMAN;tr|H7BY10|H7BY10_HUMAN;tr|K7EJV9|K7EJV9_HUMAN;tr|K7ERT8|K7ERT8_HUMAN;tr|A8MUS3|A8MUS3_HUMAN;tr|K7EMA7|K7EMA7_HUMAN	1.05029	0.712489	0.956525	1	1.16968	8045200	11442000	9223700	1	3544400	8449800	8152300	8822700	1	4145800	7;7;7;7;7;5	7;7;7;7;7;5	7;7;7;7;7;5	sp|P62750|RL23A_HUMAN 60S ribosomal protein L23a OS=Homo sapiens GN=RPL23A PE=1 SV=1;tr|H7BY10|H7BY10_HUMAN 60S ribosomal protein L23a (Fragment) OS=Homo sapiens GN=RPL23A PE=1 SV=1;tr|K7EJV9|K7EJV9_HUMAN 60S ribosomal protein L23a (Fragment) OS=Homo sapie	6	7	7	7	4	7	4	1	2	5	3	5	1	3	4	7	4	1	2	5	3	5	1	3	4	7	4	1	2
sp|O43813|LANC1_HUMAN;tr|V9P921|V9P921_HUMAN;tr|H0YHL2|H0YHL2_HUMAN	sp|O43813|LANC1_HUMAN;tr|V9P921|V9P921_HUMAN;tr|H0YHL2|H0YHL2_HUMAN	1.05022	0.616122	0.860458	1.04667	1.03857	6385600	9079700	7325400	6337800	5144000	6706300	5594200	6303200	6633600	5342400	13;11;7	13;11;7	13;11;7	sp|O43813|LANC1_HUMAN LanC-like protein 1 OS=Homo sapiens GN=LANCL1 PE=1 SV=1;tr|V9P921|V9P921_HUMAN Interferon regulatory factor 1 OS=Homo sapiens GN=IRF1 PE=1 SV=1;tr|H0YHL2|H0YHL2_HUMAN Bromodomain adjacent to zinc finger domain protein 2A (Fragment) OS	3	13	13	13	5	9	8	3	5	6	4	5	3	4	5	9	8	3	5	6	4	5	3	4	5	9	8	3	5
sp|Q07955|SRSF1_HUMAN;tr|J3KTL2|J3KTL2_HUMAN;tr|J3KSR8|J3KSR8_HUMAN;tr|J3QQV5|J3QQV5_HUMAN;tr|J3KSW7|J3KSW7_HUMAN	sp|Q07955|SRSF1_HUMAN;tr|J3KTL2|J3KTL2_HUMAN	1.04449	1.07	0.996452	1	3454700	4596800	3855900	5891000	1	1	4801300	4125800	5870100	1	3454700	12;12;5;4;4	12;12;5;4;4	11;11;5;4;4	sp|Q07955|SRSF1_HUMAN Serine/arginine-rich splicing factor 1 OS=Homo sapiens GN=SRSF1 PE=1 SV=2;tr|J3KTL2|J3KTL2_HUMAN Serine/arginine-rich-splicing factor 1 OS=Homo sapiens GN=SRSF1 PE=1 SV=1	5	12	12	11	7	4	9	1	4	4	3	4	1	3	7	4	9	1	4	4	3	4	1	3	7	4	9	1	3
sp|Q9NW13|RBM28_HUMAN;tr|C9JAA9|C9JAA9_HUMAN;tr|H7C5G8|H7C5G8_HUMAN;tr|C9JE21|C9JE21_HUMAN	sp|Q9NW13|RBM28_HUMAN	1.0631	1.26302	0.86786	0.87689	1.10569	13440000	10615000	13849000	6779300	11486000	14288000	13407000	12019000	5944700	12700000	19;6;3;3	19;6;3;3	19;6;3;3	sp|Q9NW13|RBM28_HUMAN RNA-binding protein 28 OS=Homo sapiens GN=RBM28 PE=1 SV=3	4	19	19	19	10	8	15	5	10	13	15	10	4	6	10	8	15	5	10	13	15	10	4	6	10	8	15	5	10
sp|O43290|SNUT1_HUMAN;tr|E9PQI8|E9PQI8_HUMAN	sp|O43290|SNUT1_HUMAN	0.771271	0.871176	0.803924	3388200	1.03943	4772900	5495100	5561100	1	4190000	3681200	4787200	4470700	3388200	4355200	17;3	17;3	17;3	sp|O43290|SNUT1_HUMAN U4/U6.U5 tri-snRNP-associated protein 1 OS=Homo sapiens GN=SART1 PE=1 SV=1	2	17	17	17	5	7	12	1	5	6	8	5	3	6	5	7	12	1	5	6	8	5	3	6	5	7	12	1	5
sp|Q9H9L3|I20L2_HUMAN	sp|Q9H9L3|I20L2_HUMAN	1.04023	0.813289	0.951648	1	1.00058	2647000	2763100	2957500	1	2909700	2753500	2247200	2814500	1	2911400	8	8	8	sp|Q9H9L3|I20L2_HUMAN Interferon-stimulated 20 kDa exonuclease-like 2 OS=Homo sapiens GN=ISG20L2 PE=1 SV=1	1	8	8	8	6	4	4	1	2	4	5	5	0	3	6	4	4	1	2	4	5	5	0	3	6	4	4	1	2
sp|Q5T280|CI114_HUMAN;tr|R4GNG4|R4GNG4_HUMAN;tr|A0A087WYA7|A0A087WYA7_HUMAN	sp|Q5T280|CI114_HUMAN	1.1421	1.4319	0.822588	1.02856	0.858254	2848700	2242900	3412400	2678800	2840300	3253500	3211600	2807000	2755300	2437700	5;1;1	5;1;1	5;1;1	sp|Q5T280|CI114_HUMAN Putative methyltransferase C9orf114 OS=Homo sapiens GN=C9orf114 PE=1 SV=3	3	5	5	5	4	3	3	2	5	3	2	4	2	4	4	3	3	2	5	3	2	4	2	4	4	3	3	2	5
sp|O15381|NVL_HUMAN;tr|E7EWK7|E7EWK7_HUMAN;tr|E9PH71|E9PH71_HUMAN;tr|E9PGD8|E9PGD8_HUMAN;tr|C9JP83|C9JP83_HUMAN;tr|C9J6P7|C9J6P7_HUMAN;tr|F8WF01|F8WF01_HUMAN	sp|O15381|NVL_HUMAN	1.17978	0.959766	0.981943	0.875562	1.17518	13761000	13173000	14731000	14674000	12798000	16235000	12643000	14465000	12848000	15040000	22;8;7;5;4;4;2	22;8;7;5;4;4;2	22;8;7;5;4;4;2	sp|O15381|NVL_HUMAN Nuclear valosin-containing protein-like OS=Homo sapiens GN=NVL PE=1 SV=1	7	22	22	22	15	8	12	10	10	9	10	10	9	14	15	8	12	10	10	9	10	10	9	14	15	8	12	10	10
sp|Q9BZI7|REN3B_HUMAN;tr|A0A087WYC8|A0A087WYC8_HUMAN	sp|Q9BZI7|REN3B_HUMAN;tr|A0A087WYC8|A0A087WYC8_HUMAN	1.03569	1	7.67165e-07	1	1	1415000	1	1303500	1	1	1465500	1	1	1	1	8;6	8;6	8;6	sp|Q9BZI7|REN3B_HUMAN Regulator of nonsense transcripts 3B OS=Homo sapiens GN=UPF3B PE=1 SV=1;tr|A0A087WYC8|A0A087WYC8_HUMAN Regulator of nonsense transcripts 3B OS=Homo sapiens GN=UPF3B PE=1 SV=1	2	8	8	8	2	3	3	0	1	5	1	1	0	1	2	3	3	0	1	5	1	1	0	1	2	3	3	0	1
sp|Q9Y2R4|DDX52_HUMAN;tr|A0A087X1P7|A0A087X1P7_HUMAN;tr|A0A087WTD6|A0A087WTD6_HUMAN;tr|A0A087X069|A0A087X069_HUMAN;tr|A0A087X121|A0A087X121_HUMAN	sp|Q9Y2R4|DDX52_HUMAN	0.8	1.27862	0.984017	1.23238	1.02303	11232000	8162700	11012000	5026300	8960900	8985600	10437000	10836000	6194300	9167300	15;3;3;3;2	15;3;3;3;2	15;3;3;3;2	sp|Q9Y2R4|DDX52_HUMAN Probable ATP-dependent RNA helicase DDX52 OS=Homo sapiens GN=DDX52 PE=1 SV=3	5	15	15	15	9	6	10	2	5	4	9	7	3	9	9	6	10	2	5	4	9	7	3	9	9	6	10	2	5
sp|Q8NE71|ABCF1_HUMAN;tr|H0YGW7|H0YGW7_HUMAN;tr|Q5STZ8|Q5STZ8_HUMAN;tr|A0A0G2JIC2|A0A0G2JIC2_HUMAN;tr|F5GYK6|F5GYK6_HUMAN	sp|Q8NE71|ABCF1_HUMAN;tr|H0YGW7|H0YGW7_HUMAN	1.03295	1.0348	0.946682	5.27537e-07	1.08113	7956400	6531600	8040400	1895600	6208700	8218600	6758900	7611700	1	6712400	16;11;6;4;1	16;11;6;4;1	16;11;6;4;1	sp|Q8NE71|ABCF1_HUMAN ATP-binding cassette sub-family F member 1 OS=Homo sapiens GN=ABCF1 PE=1 SV=2;tr|H0YGW7|H0YGW7_HUMAN ATP-binding cassette sub-family F member 1 (Fragment) OS=Homo sapiens GN=ABCF1 PE=1 SV=1	5	16	16	16	13	9	12	2	7	12	9	9	1	9	13	9	12	2	7	12	9	9	1	9	13	9	12	2	7
sp|Q8TDF6|GRP4_HUMAN;tr|H3BTW2|H3BTW2_HUMAN;tr|A0A0A0MS18|A0A0A0MS18_HUMAN	sp|Q8TDF6|GRP4_HUMAN	1.03246	7.10026e-07	6.78564e-07	1	1	1367700	1408400	1473700	1	1	1412100	1	1	1	1	4;1;1	4;1;1	3;0;1	sp|Q8TDF6|GRP4_HUMAN RAS guanyl-releasing protein 4 OS=Homo sapiens GN=RASGRP4 PE=1 SV=2	3	4	4	3	2	3	2	0	1	3	1	1	0	1	2	3	2	0	1	3	1	1	0	1	2	2	2	0	1
sp|P61254|RL26_HUMAN;tr|J3QRI7|J3QRI7_HUMAN;tr|J3QQQ9|J3QQQ9_HUMAN;tr|J3QQV1|J3QQV1_HUMAN;tr|J3QRC4|J3QRC4_HUMAN;tr|J3KTJ8|J3KTJ8_HUMAN;tr|E5RIT6|E5RIT6_HUMAN;sp|Q9UNX3|RL26L_HUMAN;tr|J3KSS0|J3KSS0_HUMAN;tr|E5RHH1|E5RHH1_HUMAN;tr|J3KS10|J3KS10_HUMAN	sp|P61254|RL26_HUMAN;tr|J3QRI7|J3QRI7_HUMAN;tr|J3QQQ9|J3QQQ9_HUMAN;tr|J3QQV1|J3QQV1_HUMAN;tr|J3QRC4|J3QRC4_HUMAN;tr|J3KTJ8|J3KTJ8_HUMAN;tr|E5RIT6|E5RIT6_HUMAN;sp|Q9UNX3|RL26L_HUMAN	0.926032	1.23895	0.750792	1.46878	1.01214	18900000	17066000	21139000	9838100	15403000	17502000	21144000	15871000	14450000	15590000	8;7;7;7;7;6;6;6;3;2;2	8;7;7;7;7;6;6;6;3;2;2	8;7;7;7;7;6;6;6;3;2;2	sp|P61254|RL26_HUMAN 60S ribosomal protein L26 OS=Homo sapiens GN=RPL26 PE=1 SV=1;tr|J3QRI7|J3QRI7_HUMAN 60S ribosomal protein L26 (Fragment) OS=Homo sapiens GN=RPL26 PE=4 SV=1;tr|J3QQQ9|J3QQQ9_HUMAN Uncharacterized protein OS=Homo sapiens PE=4 SV=1;tr|J3Q	11	8	8	8	5	5	6	3	4	4	7	3	4	7	5	5	6	3	4	4	7	3	4	7	5	5	6	3	4
sp|Q13123|RED_HUMAN;tr|D6REL4|D6REL4_HUMAN;tr|Q9H4P6|Q9H4P6_HUMAN;tr|E7EQZ7|E7EQZ7_HUMAN;tr|D6RAY9|D6RAY9_HUMAN	sp|Q13123|RED_HUMAN;tr|D6REL4|D6REL4_HUMAN;tr|Q9H4P6|Q9H4P6_HUMAN;tr|E7EQZ7|E7EQZ7_HUMAN	1.02775	3.91374e-07	0.977204	4.561e-07	5.67215e-07	2991500	2555100	3114600	2192500	1763000	3074500	1	3043600	1	1	4;3;3;3;1	4;3;3;3;1	4;3;3;3;1	sp|Q13123|RED_HUMAN Protein Red OS=Homo sapiens GN=IK PE=1 SV=3;tr|D6REL4|D6REL4_HUMAN Protein Red (Fragment) OS=Homo sapiens GN=IK PE=1 SV=5;tr|Q9H4P6|Q9H4P6_HUMAN Clone TCCCIA00142 mRNA sequence OS=Homo sapiens GN=IK PE=1 SV=1;tr|E7EQZ7|E7EQZ7_HUMAN Prot	5	4	4	4	2	2	2	2	2	3	1	3	1	1	2	2	2	2	2	3	1	3	1	1	2	2	2	2	2
sp|Q9BRX2|PELO_HUMAN;tr|Q5STX8|Q5STX8_HUMAN;tr|C9IZE6|C9IZE6_HUMAN;tr|I3L492|I3L492_HUMAN;tr|H3BPL0|H3BPL0_HUMAN;tr|I3L2F3|I3L2F3_HUMAN;tr|K7ENU2|K7ENU2_HUMAN	sp|Q9BRX2|PELO_HUMAN;tr|Q5STX8|Q5STX8_HUMAN;tr|C9IZE6|C9IZE6_HUMAN;tr|I3L492|I3L492_HUMAN	1.02553	0.663097	1.07658	1	1.21037	6412100	6881800	4677400	1	4045200	6575800	4563300	5035600	1	4896200	10;10;7;5;2;2;2	10;10;7;5;2;2;2	10;10;7;5;2;2;2	sp|Q9BRX2|PELO_HUMAN Protein pelota homolog OS=Homo sapiens GN=PELO PE=1 SV=2;tr|Q5STX8|Q5STX8_HUMAN Allograft inflammatory factor 1 (Fragment) OS=Homo sapiens GN=AIF1 PE=1 SV=1;tr|C9IZE6|C9IZE6_HUMAN Nectin-3 (Fragment) OS=Homo sapiens GN=PVRL3 PE=4 SV=1;	7	10	10	10	4	5	7	0	4	5	8	6	1	4	4	5	7	0	4	5	8	6	1	4	4	5	7	0	4
sp|Q09161|NCBP1_HUMAN;tr|X6R941|X6R941_HUMAN	sp|Q09161|NCBP1_HUMAN	0.832477	1.00501	1.10386	1.02391	1.19873	8699700	8464400	8659100	6427300	7020700	7242300	8506800	9558400	6581000	8415900	12;2	12;2	12;2	sp|Q09161|NCBP1_HUMAN Nuclear cap-binding protein subunit 1 OS=Homo sapiens GN=NCBP1 PE=1 SV=1	2	12	12	12	6	7	7	3	7	7	7	5	3	9	6	7	7	3	7	7	7	5	3	9	6	7	7	3	7
sp|P78316|NOP14_HUMAN;tr|E9PFK5|E9PFK5_HUMAN	sp|P78316|NOP14_HUMAN;tr|E9PFK5|E9PFK5_HUMAN	1.02429	0.96405	0.696287	0.756589	1.01543	12021000	11516000	11876000	8612600	8604700	12313000	11102000	8269100	6516200	8737500	20;17	20;17	20;17	sp|P78316|NOP14_HUMAN Nucleolar protein 14 OS=Homo sapiens GN=NOP14 PE=1 SV=3;tr|E9PFK5|E9PFK5_HUMAN Nucleolar protein 14 OS=Homo sapiens GN=NOP14 PE=1 SV=1	2	20	20	20	12	12	9	4	9	11	13	9	4	11	12	12	9	4	9	11	13	9	4	11	12	12	9	4	9
sp|Q15782|CH3L2_HUMAN;tr|H7C408|H7C408_HUMAN;tr|J3QRJ1|J3QRJ1_HUMAN;tr|C9JW33|C9JW33_HUMAN;tr|C9JSB1|C9JSB1_HUMAN;tr|C9JEI3|C9JEI3_HUMAN	sp|Q15782|CH3L2_HUMAN	1.02105	0.892042	1.06888	1	4.06504e-07	2745200	3220700	2581200	1	2460000	2803000	2873000	2759000	1	1	8;3;3;2;1;1	8;3;3;2;1;1	8;3;3;2;1;1	sp|Q15782|CH3L2_HUMAN Chitinase-3-like protein 2 OS=Homo sapiens GN=CHI3L2 PE=1 SV=1	6	8	8	8	4	5	4	0	2	5	4	5	0	3	4	5	4	0	2	5	4	5	0	3	4	5	4	0	2
sp|Q2TAY7|SMU1_HUMAN	sp|Q2TAY7|SMU1_HUMAN	1.02057	1.02979	0.900299	1	0.680033	3894400	3283100	3348000	1	4050100	3974500	3380900	3014200	1	2754200	7	7	7	sp|Q2TAY7|SMU1_HUMAN WD40 repeat-containing protein SMU1 OS=Homo sapiens GN=SMU1 PE=1 SV=2	1	7	7	7	7	5	2	0	3	3	4	5	0	4	7	5	2	0	3	3	4	5	0	4	7	5	2	0	3
tr|A0A0A0MR02|A0A0A0MR02_HUMAN;sp|P45880|VDAC2_HUMAN;tr|Q5JSD2|Q5JSD2_HUMAN;tr|Q5JSD1|Q5JSD1_HUMAN	tr|A0A0A0MR02|A0A0A0MR02_HUMAN;sp|P45880|VDAC2_HUMAN	1.01836	2582100	1.03151	4.44523e-07	8.08342e-07	4460000	1	2545500	2249600	1237100	4541900	2582100	2625700	1	1	5;5;2;2	5;5;2;2	5;5;2;2	tr|A0A0A0MR02|A0A0A0MR02_HUMAN Voltage-dependent anion-selective channel protein 2 (Fragment) OS=Homo sapiens GN=VDAC2 PE=1 SV=1;sp|P45880|VDAC2_HUMAN Voltage-dependent anion-selective channel protein 2 OS=Homo sapiens GN=VDAC2 PE=1 SV=2	4	5	5	5	3	1	2	2	2	3	3	2	1	2	3	1	2	2	2	3	3	2	1	2	3	1	2	2	2
sp|Q96B26|EXOS8_HUMAN	sp|Q96B26|EXOS8_HUMAN	1.01801	2.89687e-07	1	3.97078e-07	1.27814	3702900	3452000	1	2518400	2607300	3769600	1	1	1	3332500	3	3	3	sp|Q96B26|EXOS8_HUMAN Exosome complex component RRP43 OS=Homo sapiens GN=EXOSC8 PE=1 SV=1	1	3	3	3	2	2	1	2	3	3	1	1	1	2	2	2	1	2	3	3	1	1	1	2	2	2	1	2	3
sp|Q9NWT1|PK1IP_HUMAN	sp|Q9NWT1|PK1IP_HUMAN	1.01616	1208800	1.03455e-06	1	1492400	1343000	1	966600	1	1	1364700	1208800	1	1	1492400	4	4	4	sp|Q9NWT1|PK1IP_HUMAN p21-activated protein kinase-interacting protein 1 OS=Homo sapiens GN=PAK1IP1 PE=1 SV=2	1	4	4	4	4	1	2	0	1	2	3	0	0	3	4	1	2	0	1	2	3	0	0	3	4	1	2	0	1
sp|Q8TDD1|DDX54_HUMAN;tr|F8VRX4|F8VRX4_HUMAN;tr|H0YHH7|H0YHH7_HUMAN	sp|Q8TDD1|DDX54_HUMAN	0.988778	1.03629	1.04222	0.937155	1.11612	16842000	13201000	13998000	11584000	13219000	16653000	13680000	14589000	10856000	14754000	23;8;4	23;8;4	23;8;4	sp|Q8TDD1|DDX54_HUMAN ATP-dependent RNA helicase DDX54 OS=Homo sapiens GN=DDX54 PE=1 SV=2	3	23	23	23	12	10	10	5	9	13	10	11	6	15	12	10	10	5	9	13	10	11	6	15	12	10	10	5	9
tr|F8W7C6|F8W7C6_HUMAN;tr|A0A087WV22|A0A087WV22_HUMAN;tr|X1WI28|X1WI28_HUMAN;sp|P27635|RL10_HUMAN;tr|H7C123|H7C123_HUMAN;tr|H7C2C5|H7C2C5_HUMAN;sp|Q96L21|RL10L_HUMAN;tr|B8A6G2|B8A6G2_HUMAN;tr|A6QRI9|A6QRI9_HUMAN;tr|H7C2U2|H7C2U2_HUMAN	tr|F8W7C6|F8W7C6_HUMAN;tr|A0A087WV22|A0A087WV22_HUMAN;tr|X1WI28|X1WI28_HUMAN;sp|P27635|RL10_HUMAN;tr|H7C123|H7C123_HUMAN;tr|H7C2C5|H7C2C5_HUMAN	1.60169	0.740542	1.09606	1.04922	0.804703	37298000	71025000	55819000	33928000	32663000	59740000	52597000	61181000	35598000	26284000	10;9;9;9;7;7;4;2;2;1	10;9;9;9;7;7;4;2;2;1	10;9;9;9;7;7;4;2;2;1	tr|F8W7C6|F8W7C6_HUMAN 60S ribosomal protein L10 OS=Homo sapiens GN=RPL10 PE=1 SV=2;tr|A0A087WV22|A0A087WV22_HUMAN 60S ribosomal protein L10 OS=Homo sapiens GN=RPL10 PE=1 SV=1;tr|X1WI28|X1WI28_HUMAN 60S ribosomal protein L10 (Fragment) OS=Homo sapiens GN=R	10	10	10	10	8	7	8	4	6	8	7	7	4	6	8	7	8	4	6	8	7	7	4	6	8	7	8	4	6
sp|Q13601|KRR1_HUMAN;tr|A0A087WZC7|A0A087WZC7_HUMAN;CON__O43790;CON__Q14533;tr|F8VW96|F8VW96_HUMAN	sp|Q13601|KRR1_HUMAN;tr|A0A087WZC7|A0A087WZC7_HUMAN	1.0126	0.550708	0.68697	0.884835	0.929642	10079000	15686000	9950800	7666400	7257200	10206000	8638400	6835900	6783500	6746600	14;7;2;2;2	11;7;1;1;1	11;7;1;1;1	sp|Q13601|KRR1_HUMAN KRR1 small subunit processome component homolog OS=Homo sapiens GN=KRR1 PE=1 SV=4;tr|A0A087WZC7|A0A087WZC7_HUMAN KRR1 small subunit processome component homolog OS=Homo sapiens GN=KRR1 PE=1 SV=1	5	14	11	11	4	9	6	4	5	6	4	4	5	4	4	7	5	3	4	5	4	3	3	3	4	7	5	3	4
sp|P0DMV9|HS71B_HUMAN;sp|P0DMV8|HS71A_HUMAN;tr|A0A0G2JIW1|A0A0G2JIW1_HUMAN;tr|V9GZ37|V9GZ37_HUMAN	sp|P0DMV9|HS71B_HUMAN;sp|P0DMV8|HS71A_HUMAN;tr|A0A0G2JIW1|A0A0G2JIW1_HUMAN;tr|V9GZ37|V9GZ37_HUMAN	0.979492	0.95657	1.3961	0.854233	0.900157	29501000	34884000	23080000	21404000	20322000	28896000	33369000	32222000	18284000	18293000	22;22;22;13	20;20;20;12	11;11;11;6	sp|P0DMV9|HS71B_HUMAN Heat shock 70 kDa protein 1B OS=Homo sapiens GN=HSPA1B PE=1 SV=1;sp|P0DMV8|HS71A_HUMAN Heat shock 70 kDa protein 1A OS=Homo sapiens GN=HSPA1A PE=1 SV=1;tr|A0A0G2JIW1|A0A0G2JIW1_HUMAN Heat shock 70 kDa protein 1B OS=Homo sapiens GN=HSP	4	22	20	11	13	12	10	12	11	10	15	13	10	9	11	11	9	11	10	9	14	12	9	8	5	4	4	6	5
sp|P78332|RBM6_HUMAN;tr|E9PGM9|E9PGM9_HUMAN;tr|F8WCA5|F8WCA5_HUMAN;tr|F8WF63|F8WF63_HUMAN;tr|C9JSL1|C9JSL1_HUMAN	sp|P78332|RBM6_HUMAN;tr|E9PGM9|E9PGM9_HUMAN;tr|F8WCA5|F8WCA5_HUMAN	1.01174	1.18378	1.25119	3.2759e-07	1.11276	3091800	2578600	3380700	3052600	3881700	3128100	3052500	4229900	1	4319400	14;12;10;2;1	13;11;10;2;1	13;11;10;2;1	sp|P78332|RBM6_HUMAN RNA-binding protein 6 OS=Homo sapiens GN=RBM6 PE=1 SV=5;tr|E9PGM9|E9PGM9_HUMAN RNA-binding protein 6 OS=Homo sapiens GN=RBM6 PE=1 SV=1;tr|F8WCA5|F8WCA5_HUMAN RNA-binding protein 6 OS=Homo sapiens GN=RBM6 PE=1 SV=1	5	14	13	13	6	9	9	4	5	7	10	8	2	8	5	8	8	3	4	7	9	7	1	8	5	8	8	3	4
tr|A0A0B4J1Z1|A0A0B4J1Z1_HUMAN;tr|C9JAB2|C9JAB2_HUMAN;sp|Q16629|SRSF7_HUMAN;tr|F8WEA1|F8WEA1_HUMAN	tr|A0A0B4J1Z1|A0A0B4J1Z1_HUMAN;tr|C9JAB2|C9JAB2_HUMAN;sp|Q16629|SRSF7_HUMAN	1.21341	1.00769	0.96638	1.09924	0.807083	19873000	23269000	28584000	11135000	16971000	24114000	23448000	27623000	12240000	13697000	7;7;7;2	7;7;7;2	6;6;6;2	tr|A0A0B4J1Z1|A0A0B4J1Z1_HUMAN Serine/arginine-rich-splicing factor 7 OS=Homo sapiens GN=SRSF7 PE=1 SV=1;tr|C9JAB2|C9JAB2_HUMAN Serine/arginine-rich-splicing factor 7 OS=Homo sapiens GN=SRSF7 PE=1 SV=1;sp|Q16629|SRSF7_HUMAN Serine/arginine-rich splicing fa	4	7	7	6	5	6	5	4	4	6	7	4	5	3	5	6	5	4	4	6	7	4	5	3	4	5	4	3	3
tr|J3QR09|J3QR09_HUMAN;sp|P84098|RL19_HUMAN;tr|J3KTE4|J3KTE4_HUMAN;tr|J3QL15|J3QL15_HUMAN	tr|J3QR09|J3QR09_HUMAN;sp|P84098|RL19_HUMAN;tr|J3KTE4|J3KTE4_HUMAN	1.00679	1.10337	0.684086	1.69258	0.989384	94864000	72152000	93921000	40300000	58118000	95508000	79610000	64250000	68211000	57501000	10;10;9;4	10;10;9;4	10;10;9;4	tr|J3QR09|J3QR09_HUMAN Ribosomal protein L19 OS=Homo sapiens GN=RPL19 PE=1 SV=1;sp|P84098|RL19_HUMAN 60S ribosomal protein L19 OS=Homo sapiens GN=RPL19 PE=1 SV=1;tr|J3KTE4|J3KTE4_HUMAN Ribosomal protein L19 OS=Homo sapiens GN=RPL19 PE=1 SV=1	4	10	10	10	6	8	8	7	4	6	8	8	3	5	6	8	8	7	4	6	8	8	3	5	6	8	8	7	4
sp|Q00839|HNRPU_HUMAN;tr|Q5RI18|Q5RI18_HUMAN	sp|Q00839|HNRPU_HUMAN	1.00609	0.953443	1.00853	1.07837	1.03855	138030000	143910000	116050000	102850000	101950000	138870000	137210000	117040000	110910000	105880000	24;6	24;6	24;6	sp|Q00839|HNRPU_HUMAN Heterogeneous nuclear ribonucleoprotein U OS=Homo sapiens GN=HNRNPU PE=1 SV=6	2	24	24	24	18	19	14	12	12	14	15	15	10	12	18	19	14	12	12	14	15	15	10	12	18	19	14	12	12
tr|J3KMX5|J3KMX5_HUMAN;sp|P62277|RS13_HUMAN;tr|E9PS50|E9PS50_HUMAN	tr|J3KMX5|J3KMX5_HUMAN;sp|P62277|RS13_HUMAN	1.00222	0.861542	2.09407e-07	1	0.857319	5323800	6020600	4775400	1	5197600	5335600	5187000	1	1	4456000	5;5;2	5;5;2	5;5;2	tr|J3KMX5|J3KMX5_HUMAN 40S ribosomal protein S13 OS=Homo sapiens GN=RPS13 PE=1 SV=1;sp|P62277|RS13_HUMAN 40S ribosomal protein S13 OS=Homo sapiens GN=RPS13 PE=1 SV=2	3	5	5	5	4	4	3	0	2	3	2	1	0	3	4	4	3	0	2	3	2	1	0	3	4	4	3	0	2
tr|A0A0A0MTQ6|A0A0A0MTQ6_HUMAN;tr|A0A087X0P6|A0A087X0P6_HUMAN;tr|A0A087X0Q4|A0A087X0Q4_HUMAN;tr|A0A087WW87|A0A087WW87_HUMAN;tr|A0A075B6R1|A0A075B6R1_HUMAN;sp|P01617|KV204_HUMAN;sp|P01614|KV201_HUMAN;sp|P06309|KV205_HUMAN;tr|A0A075B6S6|A0A075B6S6_HUMAN;tr|A0A075B6S3|A0A075B6S3_HUMAN;tr|A0A075B6S2|A0A075B6S2_HUMAN;sp|P06310|KV206_HUMAN;tr|A0A0A0MRZ7|A0A0A0MRZ7_HUMAN;tr|A0A075B6P5|A0A075B6P5_HUMAN	tr|A0A0A0MTQ6|A0A0A0MTQ6_HUMAN;tr|A0A087X0P6|A0A087X0P6_HUMAN;tr|A0A087X0Q4|A0A087X0Q4_HUMAN;tr|A0A087WW87|A0A087WW87_HUMAN;tr|A0A075B6R1|A0A075B6R1_HUMAN;sp|P01617|KV204_HUMAN;sp|P01614|KV201_HUMAN;sp|P06309|KV205_HUMAN;tr|A0A075B6S6|A0A075B6S6_HUMAN;tr|A0A075B6S3|A0A075B6S3_HUMAN;tr|A0A075B6S2|A0A075B6S2_HUMAN;sp|P06310|KV206_HUMAN;tr|A0A0A0MRZ7|A0A0A0MRZ7_HUMAN;tr|A0A075B6P5|A0A075B6P5_HUMAN	1	3.36349e-10	1.56341	1	1153900000	1	2973100000	849810000	1	1	1	1	1328600000	1	1153900000	2;2;2;2;2;2;2;2;2;2;2;2;2;2	2;2;2;2;2;2;2;2;2;2;2;2;2;2	2;2;2;2;2;2;2;2;2;2;2;2;2;2	tr|A0A0A0MTQ6|A0A0A0MTQ6_HUMAN Protein IGKV2D-28 OS=Homo sapiens GN=IGKV2D-28 PE=1 SV=1;tr|A0A087X0P6|A0A087X0P6_HUMAN Protein IGKV2D-29 OS=Homo sapiens GN=IGKV2D-29 PE=1 SV=1;tr|A0A087X0Q4|A0A087X0Q4_HUMAN Protein IGKV2-40 OS=Homo sapiens GN=IGKV2-40 PE=1	14	2	2	2	1	2	1	1	1	1	1	2	1	1	1	2	1	1	1	1	1	2	1	1	1	2	1	1	1
sp|Q96IM9|DYDC2_HUMAN;tr|U3KQD0|U3KQD0_HUMAN;tr|H7C4K4|H7C4K4_HUMAN	sp|Q96IM9|DYDC2_HUMAN	1	1	1	1	19346000	1	1	1	1	1	1	1	1	1	19346000	3;1;1	3;1;1	3;1;1	sp|Q96IM9|DYDC2_HUMAN DPY30 domain-containing protein 2 OS=Homo sapiens GN=DYDC2 PE=2 SV=1	3	3	3	3	1	1	1	1	1	2	1	0	1	2	1	1	1	1	1	2	1	0	1	2	1	1	1	1	1
sp|A6NHQ2|FBLL1_HUMAN	sp|A6NHQ2|FBLL1_HUMAN	1	6.97934e-08	12594000	1	16329000	1	14328000	1	1	1	1	1	12594000	1	16329000	4	2	2	sp|A6NHQ2|FBLL1_HUMAN rRNA/tRNA 2-O-methyltransferase fibrillarin-like protein 1 OS=Homo sapiens GN=FBLL1 PE=3 SV=2	1	4	2	2	3	3	2	1	2	2	2	2	1	3	1	2	1	0	1	1	1	2	0	2	1	2	1	0	1
sp|Q8IWA0|WDR75_HUMAN	sp|Q8IWA0|WDR75_HUMAN	1	1.22193	5.36078e-07	3.84882e-07	2.20483	1	1826700	1865400	2598200	4561800	1	2232100	1	1	10058000	13	13	13	sp|Q8IWA0|WDR75_HUMAN WD repeat-containing protein 75 OS=Homo sapiens GN=WDR75 PE=1 SV=1	1	13	13	13	5	3	3	2	4	4	2	2	0	9	5	3	3	2	4	4	2	2	0	9	5	3	3	2	4
sp|Q9BUA3|CK084_HUMAN;tr|H0YGK9|H0YGK9_HUMAN;tr|H0YGY5|H0YGY5_HUMAN	sp|Q9BUA3|CK084_HUMAN	1	1.24065	1.68769	1	0.946189	1	5446600	3991500	1	5549100	1	6757300	6736400	1	5250500	7;1;1	7;1;1	7;1;1	sp|Q9BUA3|CK084_HUMAN Uncharacterized protein C11orf84 OS=Homo sapiens GN=C11orf84 PE=1 SV=3	3	7	7	7	2	2	3	1	2	1	5	2	1	3	2	2	3	1	2	1	5	2	1	3	2	2	3	1	2
tr|B1AN99|B1AN99_HUMAN;sp|P35030|TRY3_HUMAN	tr|B1AN99|B1AN99_HUMAN;sp|P35030|TRY3_HUMAN	1	1	1	1	3905500	1	1	1	1	1	1	1	1	1	3905500	1;1	1;1	1;1	tr|B1AN99|B1AN99_HUMAN Trypsin-3 (Fragment) OS=Homo sapiens GN=PRSS3 PE=1 SV=5;sp|P35030|TRY3_HUMAN Trypsin-3 OS=Homo sapiens GN=PRSS3 PE=1 SV=2	2	1	1	1	0	0	0	0	0	0	0	0	0	1	0	0	0	0	0	0	0	0	0	1	0	0	0	0	0
sp|P16104|H2AX_HUMAN;sp|Q96QV6|H2A1A_HUMAN;sp|Q8IUE6|H2A2B_HUMAN	sp|P16104|H2AX_HUMAN;sp|Q96QV6|H2A1A_HUMAN;sp|Q8IUE6|H2A2B_HUMAN	1	1378300	1	1	1.08394	1	1	1	1	3567000	1	1378300	1	1	3866400	3;3;2	1;1;1	1;1;1	sp|P16104|H2AX_HUMAN Histone H2AX OS=Homo sapiens GN=H2AFX PE=1 SV=2;sp|Q96QV6|H2A1A_HUMAN Histone H2A type 1-A OS=Homo sapiens GN=HIST1H2AA PE=1 SV=3;sp|Q8IUE6|H2A2B_HUMAN Histone H2A type 2-B OS=Homo sapiens GN=HIST2H2AB PE=1 SV=3	3	3	1	1	1	1	2	2	2	2	2	1	0	2	0	0	1	0	1	0	1	0	0	1	0	0	1	0	1
tr|M0R221|M0R221_HUMAN;tr|M0R2B8|M0R2B8_HUMAN;sp|P09012|SNRPA_HUMAN;tr|M0R0G9|M0R0G9_HUMAN;tr|M0QXK2|M0QXK2_HUMAN;tr|M0QZG7|M0QZG7_HUMAN;tr|M0R268|M0R268_HUMAN	tr|M0R221|M0R221_HUMAN;tr|M0R2B8|M0R2B8_HUMAN;sp|P09012|SNRPA_HUMAN;tr|M0R0G9|M0R0G9_HUMAN;tr|M0QXK2|M0QXK2_HUMAN;tr|M0QZG7|M0QZG7_HUMAN;tr|M0R268|M0R268_HUMAN	1	0.78812	1.1615	1	3743800	1	5320000	4172200	1	1	1	4192800	4846000	1	3743800	4;4;4;3;3;3;2	3;3;3;2;2;2;1	3;3;3;2;2;2;1	tr|M0R221|M0R221_HUMAN U1 small nuclear ribonucleoprotein A (Fragment) OS=Homo sapiens GN=SNRPA PE=1 SV=1;tr|M0R2B8|M0R2B8_HUMAN U1 small nuclear ribonucleoprotein A (Fragment) OS=Homo sapiens GN=SNRPA PE=1 SV=1;sp|P09012|SNRPA_HUMAN U1 small nuclear ribon	7	4	3	3	1	2	3	1	0	2	3	3	1	3	1	2	2	0	0	1	2	3	0	2	1	2	2	0	0
sp|P52756|RBM5_HUMAN;tr|C9J9P7|C9J9P7_HUMAN;tr|C9JFQ5|C9JFQ5_HUMAN	sp|P52756|RBM5_HUMAN	1	1.39857	1	1	3147200	1	2426700	1	1	1	1	3393900	1	1	3147200	7;1;1	5;1;1	5;1;1	sp|P52756|RBM5_HUMAN RNA-binding protein 5 OS=Homo sapiens GN=RBM5 PE=1 SV=2	3	7	5	5	1	3	1	0	1	2	3	2	1	3	1	2	1	0	1	2	3	1	1	3	1	2	1	0	1
sp|P17066|HSP76_HUMAN;sp|P48741|HSP77_HUMAN	sp|P17066|HSP76_HUMAN;sp|P48741|HSP77_HUMAN	1	1	1	1	2935400	1	1	1	1	1	1	1	1	1	2935400	7;4	1;1	1;1	sp|P17066|HSP76_HUMAN Heat shock 70 kDa protein 6 OS=Homo sapiens GN=HSPA6 PE=1 SV=2;sp|P48741|HSP77_HUMAN Putative heat shock 70 kDa protein 7 OS=Homo sapiens GN=HSPA7 PE=5 SV=2	2	7	1	1	5	5	4	6	5	4	4	4	5	4	1	1	1	1	1	1	1	1	1	1	1	1	1	1	1
sp|P01859|IGHG2_HUMAN;tr|A0A0G2JN06|A0A0G2JN06_HUMAN	sp|P01859|IGHG2_HUMAN;tr|A0A0G2JN06|A0A0G2JN06_HUMAN	1	1	1	1	2603200	1	1	1	1	1	1	1	1	1	2603200	1;1	1;1	1;1	sp|P01859|IGHG2_HUMAN Ig gamma-2 chain C region OS=Homo sapiens GN=IGHG2 PE=1 SV=2;tr|A0A0G2JN06|A0A0G2JN06_HUMAN Uncharacterized protein OS=Homo sapiens PE=4 SV=1	2	1	1	1	0	1	1	0	0	0	1	1	0	1	0	1	1	0	0	0	1	1	0	1	0	1	1	0	0
sp|Q16643|DREB_HUMAN;tr|D6R9W4|D6R9W4_HUMAN;tr|D6R9Q9|D6R9Q9_HUMAN;tr|D6RFI1|D6RFI1_HUMAN	sp|Q16643|DREB_HUMAN;tr|D6R9W4|D6R9W4_HUMAN;tr|D6R9Q9|D6R9Q9_HUMAN	1	1.77978	1	1	2520600	1	1384500	1	1	1	1	2464100	1	1	2520600	6;4;3;2	6;4;3;2	5;3;3;1	sp|Q16643|DREB_HUMAN Drebrin OS=Homo sapiens GN=DBN1 PE=1 SV=4;tr|D6R9W4|D6R9W4_HUMAN Drebrin (Fragment) OS=Homo sapiens GN=DBN1 PE=1 SV=1;tr|D6R9Q9|D6R9Q9_HUMAN Drebrin OS=Homo sapiens GN=DBN1 PE=1 SV=1	4	6	6	5	0	2	1	0	0	2	4	1	0	4	0	2	1	0	0	2	4	1	0	4	0	2	0	0	0
tr|I3L2C7|I3L2C7_HUMAN;sp|P57678|GEMI4_HUMAN;tr|E7EN12|E7EN12_HUMAN;tr|I3L4M4|I3L4M4_HUMAN;tr|I3L4A4|I3L4A4_HUMAN;tr|I3L399|I3L399_HUMAN;tr|I3L1J7|I3L1J7_HUMAN	tr|I3L2C7|I3L2C7_HUMAN;sp|P57678|GEMI4_HUMAN	1	1	1	1	1.11952	1	1	1	1	2188000	1	1	1	1	2449500	7;7;2;2;2;2;1	7;7;2;2;2;2;1	7;7;2;2;2;2;1	tr|I3L2C7|I3L2C7_HUMAN Gem-associated protein 4 OS=Homo sapiens GN=GEMIN4 PE=1 SV=1;sp|P57678|GEMI4_HUMAN Gem-associated protein 4 OS=Homo sapiens GN=GEMIN4 PE=1 SV=2	7	7	7	7	0	0	0	0	3	2	0	0	0	6	0	0	0	0	3	2	0	0	0	6	0	0	0	0	3
sp|P49756|RBM25_HUMAN;tr|H0YE46|H0YE46_HUMAN;tr|E9PQU5|E9PQU5_HUMAN	sp|P49756|RBM25_HUMAN	1	1	1	1	1.11289	1	1	1	1	2154400	1	1	1	1	2397600	6;2;2	6;2;2	6;2;2	sp|P49756|RBM25_HUMAN RNA-binding protein 25 OS=Homo sapiens GN=RBM25 PE=1 SV=3	3	6	6	6	0	3	2	0	3	1	1	2	0	3	0	3	2	0	3	1	1	2	0	3	0	3	2	0	3
tr|D6RA57|D6RA57_HUMAN;sp|Q96EY4|TMA16_HUMAN;tr|H0Y9X1|H0Y9X1_HUMAN;tr|D6RE67|D6RE67_HUMAN;tr|D6RC31|D6RC31_HUMAN	tr|D6RA57|D6RA57_HUMAN;sp|Q96EY4|TMA16_HUMAN;tr|H0Y9X1|H0Y9X1_HUMAN;tr|D6RE67|D6RE67_HUMAN;tr|D6RC31|D6RC31_HUMAN	1	1	1	1	2150100	1	1	1	1	1	1	1	1	1	2150100	2;2;2;1;1	2;2;2;1;1	2;2;2;1;1	tr|D6RA57|D6RA57_HUMAN Translation machinery-associated protein 16 OS=Homo sapiens GN=TMA16 PE=1 SV=1;sp|Q96EY4|TMA16_HUMAN Translation machinery-associated protein 16 OS=Homo sapiens GN=TMA16 PE=1 SV=2;tr|H0Y9X1|H0Y9X1_HUMAN Translation machinery-associat	5	2	2	2	1	1	1	1	1	1	1	1	1	2	1	1	1	1	1	1	1	1	1	2	1	1	1	1	1
tr|Q5T4L4|Q5T4L4_HUMAN;sp|P42677|RS27_HUMAN;sp|Q71UM5|RS27L_HUMAN;tr|C9JLI6|C9JLI6_HUMAN;tr|H0YMV8|H0YMV8_HUMAN	tr|Q5T4L4|Q5T4L4_HUMAN;sp|P42677|RS27_HUMAN	1	0.855441	0.875326	1.06694	2071400	1	2888100	2335700	3358000	1	1	2470600	2044500	3582800	2071400	4;4;1;1;1	4;4;1;1;1	4;4;1;1;1	tr|Q5T4L4|Q5T4L4_HUMAN 40S ribosomal protein S27 OS=Homo sapiens GN=RPS27 PE=1 SV=1;sp|P42677|RS27_HUMAN 40S ribosomal protein S27 OS=Homo sapiens GN=RPS27 PE=1 SV=3	5	4	4	4	1	3	4	3	1	1	3	2	2	2	1	3	4	3	1	1	3	2	2	2	1	3	4	3	1
sp|O43159|RRP8_HUMAN;tr|E9PPY3|E9PPY3_HUMAN;tr|E9PPP6|E9PPP6_HUMAN	sp|O43159|RRP8_HUMAN;tr|E9PPY3|E9PPY3_HUMAN	1	0.888852	0.678634	1	1.01084	1	2696400	2615400	1	1817600	1	2396700	1774900	1	1837300	5;3;2	5;3;2	5;3;2	sp|O43159|RRP8_HUMAN Ribosomal RNA-processing protein 8 OS=Homo sapiens GN=RRP8 PE=1 SV=2;tr|E9PPY3|E9PPY3_HUMAN Ribosomal RNA-processing protein 8 OS=Homo sapiens GN=RRP8 PE=1 SV=1	3	5	5	5	2	4	2	0	3	1	3	2	0	3	2	4	2	0	3	1	3	2	0	3	2	4	2	0	3
sp|P62308|RUXG_HUMAN;sp|A8MWD9|RUXGL_HUMAN;tr|Q49AN9|Q49AN9_HUMAN;tr|F5H013|F5H013_HUMAN;tr|C9JVQ0|C9JVQ0_HUMAN	sp|P62308|RUXG_HUMAN;sp|A8MWD9|RUXGL_HUMAN;tr|Q49AN9|Q49AN9_HUMAN;tr|F5H013|F5H013_HUMAN	1	0.886686	2.08121	3.29837e-07	1782200	1	1957400	1586100	3031800	1	1	1735600	3301000	1	1782200	3;3;2;2;1	3;3;2;2;1	3;3;2;2;1	sp|P62308|RUXG_HUMAN Small nuclear ribonucleoprotein G OS=Homo sapiens GN=SNRPG PE=1 SV=1;sp|A8MWD9|RUXGL_HUMAN Putative small nuclear ribonucleoprotein G-like protein 15 OS=Homo sapiens GN=SNRPGP15 PE=5 SV=2;tr|Q49AN9|Q49AN9_HUMAN SNRPG protein OS=Homo sa	5	3	3	3	1	2	2	3	0	1	2	2	1	2	1	2	2	3	0	1	2	2	1	2	1	2	2	3	0
tr|H7C1M2|H7C1M2_HUMAN	tr|H7C1M2|H7C1M2_HUMAN	1	1	1	1	1749200	1	1	1	1	1	1	1	1	1	1749200	13	1	1	tr|H7C1M2|H7C1M2_HUMAN Protein SON (Fragment) OS=Homo sapiens GN=SON PE=1 SV=1	1	13	1	1	10	1	3	2	5	6	1	2	2	7	1	0	1	0	1	1	1	1	0	1	1	0	1	0	1
tr|H3BLU7|H3BLU7_HUMAN;sp|O43488|ARK72_HUMAN;sp|Q8NHP1|ARK74_HUMAN;tr|H7C5H7|H7C5H7_HUMAN	tr|H3BLU7|H3BLU7_HUMAN;sp|O43488|ARK72_HUMAN;sp|Q8NHP1|ARK74_HUMAN	1	2.10796	2.13893	1	1.11945	1	1797000	1192000	1	1539600	1	3788000	2549600	1	1723500	4;4;2;1	4;4;2;1	4;4;2;1	tr|H3BLU7|H3BLU7_HUMAN Aflatoxin B1 aldehyde reductase member 2 (Fragment) OS=Homo sapiens GN=AKR7A2 PE=1 SV=1;sp|O43488|ARK72_HUMAN Aflatoxin B1 aldehyde reductase member 2 OS=Homo sapiens GN=AKR7A2 PE=1 SV=3;sp|Q8NHP1|ARK74_HUMAN Aflatoxin B1 aldehyde re	4	4	4	4	1	2	2	0	2	1	3	3	0	2	1	2	2	0	2	1	3	3	0	2	1	2	2	0	2
sp|O60306|AQR_HUMAN	sp|O60306|AQR_HUMAN	1	1	0.794412	1	1.28321	1	1	1367300	1	1340700	1	1	1086200	1	1720400	3	3	3	sp|O60306|AQR_HUMAN Intron-binding protein aquarius OS=Homo sapiens GN=AQR PE=1 SV=4	1	3	3	3	1	2	2	0	2	2	2	2	0	2	1	2	2	0	2	2	2	2	0	2	1	2	2	0	2
tr|H3BU53|H3BU53_HUMAN	tr|H3BU53|H3BU53_HUMAN	1	4.03128e-07	1	1	1716600	1	2480600	1	1	1	1	1	1	1	1716600	17	2	2	tr|H3BU53|H3BU53_HUMAN MAX gene-associated protein (Fragment) OS=Homo sapiens GN=MGA PE=1 SV=1	1	17	2	2	7	11	7	7	6	7	9	8	6	10	1	2	1	1	0	1	1	1	1	2	1	2	1	1	0
sp|P23458|JAK1_HUMAN	sp|P23458|JAK1_HUMAN	1	2409100	1.27241	4.26221e-07	1647600	1	1	1490400	2346200	1	1	2409100	1896400	1	1647600	6	6	6	sp|P23458|JAK1_HUMAN Tyrosine-protein kinase JAK1 OS=Homo sapiens GN=JAK1 PE=1 SV=2	1	6	6	6	1	2	3	2	1	1	4	2	0	4	1	2	3	2	1	1	4	2	0	4	1	2	3	2	1
sp|P37108|SRP14_HUMAN;tr|H0YLA2|H0YLA2_HUMAN	sp|P37108|SRP14_HUMAN;tr|H0YLA2|H0YLA2_HUMAN	1	1777800	0.977444	1	1375200	1	1	1990600	1	1	1	1777800	1945700	1	1375200	3;2	3;2	3;2	sp|P37108|SRP14_HUMAN Signal recognition particle 14 kDa protein OS=Homo sapiens GN=SRP14 PE=1 SV=2;tr|H0YLA2|H0YLA2_HUMAN Signal recognition particle 14 kDa protein OS=Homo sapiens GN=SRP14 PE=1 SV=1	2	3	3	3	1	0	2	0	1	1	2	2	0	3	1	0	2	0	1	1	2	2	0	3	1	0	2	0	1
sp|Q86W42|THOC6_HUMAN	sp|Q86W42|THOC6_HUMAN	1	1	7.74413e-07	1	1349400	1	1	1291300	1	1	1	1	1	1	1349400	4	4	4	sp|Q86W42|THOC6_HUMAN THO complex subunit 6 homolog OS=Homo sapiens GN=THOC6 PE=1 SV=1	1	4	4	4	0	2	3	0	0	1	1	1	0	2	0	2	3	0	0	1	1	1	0	2	0	2	3	0	0
tr|X6RFN3|X6RFN3_HUMAN;sp|Q99496|RING2_HUMAN;sp|Q06587|RING1_HUMAN	tr|X6RFN3|X6RFN3_HUMAN;sp|Q99496|RING2_HUMAN;sp|Q06587|RING1_HUMAN	1	1	1	1	1348000	1	1	1	1	1	1	1	1	1	1348000	1;1;1	1;1;1	1;1;1	tr|X6RFN3|X6RFN3_HUMAN E3 ubiquitin-protein ligase RING2 (Fragment) OS=Homo sapiens GN=RNF2 PE=1 SV=2;sp|Q99496|RING2_HUMAN E3 ubiquitin-protein ligase RING2 OS=Homo sapiens GN=RNF2 PE=1 SV=1;sp|Q06587|RING1_HUMAN E3 ubiquitin-protein ligase RING1 OS=Homo	3	1	1	1	1	1	1	1	1	1	1	1	1	1	1	1	1	1	1	1	1	1	1	1	1	1	1	1	1
sp|Q9UK61|F208A_HUMAN;tr|A0A087X0F1|A0A087X0F1_HUMAN	sp|Q9UK61|F208A_HUMAN	1	0.805963	7.44713e-07	1	1316400	1	1241000	1342800	1	1	1	1000200	1	1	1316400	6;2	6;2	6;2	sp|Q9UK61|F208A_HUMAN Protein FAM208A OS=Homo sapiens GN=FAM208A PE=1 SV=3	2	6	6	6	1	4	3	0	1	1	3	0	0	3	1	4	3	0	1	1	3	0	0	3	1	4	3	0	1
sp|P50991|TCPD_HUMAN	sp|P50991|TCPD_HUMAN	1	1501500	1326800	1	1309200	1	1	1	1	1	1	1501500	1326800	1	1309200	3	3	3	sp|P50991|TCPD_HUMAN T-complex protein 1 subunit delta OS=Homo sapiens GN=CCT4 PE=1 SV=4	1	3	3	3	1	1	1	0	1	1	2	3	0	2	1	1	1	0	1	1	2	3	0	2	1	1	1	0	1
sp|P15924|DESP_HUMAN	sp|P15924|DESP_HUMAN	1	1	1	1	0.0688422	1	1	1	1	18846000	1	1	1	1	1297400	23	23	23	sp|P15924|DESP_HUMAN Desmoplakin OS=Homo sapiens GN=DSP PE=1 SV=3	1	23	23	23	0	0	0	0	22	0	0	0	0	4	0	0	0	0	22	0	0	0	0	4	0	0	0	0	22
sp|O43660|PLRG1_HUMAN;tr|D6RA26|D6RA26_HUMAN;tr|B7Z982|B7Z982_HUMAN;tr|H0YA24|H0YA24_HUMAN	sp|O43660|PLRG1_HUMAN;tr|D6RA26|D6RA26_HUMAN	1	1	1	1	1220600	1	1	1	1	1	1	1	1	1	1220600	4;2;1;1	4;2;1;1	4;2;1;1	sp|O43660|PLRG1_HUMAN Pleiotropic regulator 1 OS=Homo sapiens GN=PLRG1 PE=1 SV=1;tr|D6RA26|D6RA26_HUMAN Pleiotropic regulator 1 (Fragment) OS=Homo sapiens GN=PLRG1 PE=1 SV=1	4	4	4	4	0	1	1	0	1	0	1	0	0	2	0	1	1	0	1	0	1	0	0	2	0	1	1	0	1
sp|O15371|EIF3D_HUMAN;tr|B0QYA4|B0QYA4_HUMAN;tr|B0QYA5|B0QYA5_HUMAN	sp|O15371|EIF3D_HUMAN;tr|B0QYA4|B0QYA4_HUMAN	1	1	1	1	0.759093	1	1	1	1	1534200	1	1	1	1	1164600	3;2;1	3;2;1	3;2;1	sp|O15371|EIF3D_HUMAN Eukaryotic translation initiation factor 3 subunit D OS=Homo sapiens GN=EIF3D PE=1 SV=1;tr|B0QYA4|B0QYA4_HUMAN Eukaryotic translation initiation factor 3 subunit D (Fragment) OS=Homo sapiens GN=EIF3D PE=1 SV=2	3	3	3	3	1	0	1	0	2	1	2	1	0	2	1	0	1	0	2	1	2	1	0	2	1	0	1	0	2
tr|S4R402|S4R402_HUMAN;tr|S4R341|S4R341_HUMAN;tr|S4R349|S4R349_HUMAN;sp|Q14978|NOLC1_HUMAN;tr|A0A0A0MRM9|A0A0A0MRM9_HUMAN	tr|S4R402|S4R402_HUMAN;tr|S4R341|S4R341_HUMAN;tr|S4R349|S4R349_HUMAN;sp|Q14978|NOLC1_HUMAN;tr|A0A0A0MRM9|A0A0A0MRM9_HUMAN	1	1	1	1	1110800	1	1	1	1	1	1	1	1	1	1110800	1;1;1;1;1	1;1;1;1;1	1;1;1;1;1	tr|S4R402|S4R402_HUMAN Nucleolar and coiled-body phosphoprotein 1 OS=Homo sapiens GN=NOLC1 PE=1 SV=1;tr|S4R341|S4R341_HUMAN Nucleolar and coiled-body phosphoprotein 1 OS=Homo sapiens GN=NOLC1 PE=1 SV=1;tr|S4R349|S4R349_HUMAN Nucleolar and coiled-body phosp	5	1	1	1	0	0	0	0	1	0	0	0	0	1	0	0	0	0	1	0	0	0	0	1	0	0	0	0	1
tr|H3BQM0|H3BQM0_HUMAN;sp|Q8NDF8|PAPD5_HUMAN;tr|E9PC61|E9PC61_HUMAN	tr|H3BQM0|H3BQM0_HUMAN;sp|Q8NDF8|PAPD5_HUMAN;tr|E9PC61|E9PC61_HUMAN	1	1	6.33513e-07	1	1083300	1	1	1578500	1	1	1	1	1	1	1083300	6;5;3	6;5;3	6;5;3	tr|H3BQM0|H3BQM0_HUMAN Non-canonical poly(A) RNA polymerase PAPD5 OS=Homo sapiens GN=PAPD5 PE=1 SV=1;sp|Q8NDF8|PAPD5_HUMAN Non-canonical poly(A) RNA polymerase PAPD5 OS=Homo sapiens GN=PAPD5 PE=1 SV=2;tr|E9PC61|E9PC61_HUMAN Non-canonical poly(A) RNA polyme	3	6	6	6	2	1	3	0	1	2	0	2	0	2	2	1	3	0	1	2	0	2	0	2	2	1	3	0	1
sp|Q9H2P0|ADNP_HUMAN	sp|Q9H2P0|ADNP_HUMAN	1	1433900	1	1	1.18905	1	1	1	1	909210	1	1433900	1	1	1081100	4	4	4	sp|Q9H2P0|ADNP_HUMAN Activity-dependent neuroprotector homeobox protein OS=Homo sapiens GN=ADNP PE=1 SV=1	1	4	4	4	2	2	0	0	2	2	2	1	0	2	2	2	0	0	2	2	2	1	0	2	2	2	0	0	2
tr|A0A0G2JJL1|A0A0G2JJL1_HUMAN	tr|A0A0G2JJL1|A0A0G2JJL1_HUMAN	1	1	1	1	1012800	1	1	1	1	1	1	1	1	1	1012800	6	1	1	tr|A0A0G2JJL1|A0A0G2JJL1_HUMAN WD repeat-containing protein 46 (Fragment) OS=Homo sapiens GN=WDR46 PE=4 SV=1	1	6	1	1	2	3	4	1	4	4	3	4	1	5	1	1	1	0	1	1	0	1	0	1	1	1	1	0	1
tr|M0QZM1|M0QZM1_HUMAN	tr|M0QZM1|M0QZM1_HUMAN	1	1	1	1	1012200	1	1	1	1	1	1	1	1	1	1012200	16	1	1	tr|M0QZM1|M0QZM1_HUMAN Heterogeneous nuclear ribonucleoprotein M (Fragment) OS=Homo sapiens GN=HNRNPM PE=1 SV=1	1	16	1	1	12	13	12	12	12	14	13	12	13	13	0	1	1	0	0	0	0	1	1	1	0	1	1	0	0
sp|Q5VWN6|F208B_HUMAN	sp|Q5VWN6|F208B_HUMAN	1	1	1	1	0.924727	1	1	1	1	1081000	1	1	1	1	999630	2	2	2	sp|Q5VWN6|F208B_HUMAN Protein FAM208B OS=Homo sapiens GN=FAM208B PE=1 SV=1	1	2	2	2	0	0	1	0	2	0	0	0	0	2	0	0	1	0	2	0	0	0	0	2	0	0	1	0	2
sp|Q8NAV1|PR38A_HUMAN	sp|Q8NAV1|PR38A_HUMAN	1	1	1	1	905190	1	1	1	1	1	1	1	1	1	905190	3	3	3	sp|Q8NAV1|PR38A_HUMAN Pre-mRNA-splicing factor 38A OS=Homo sapiens GN=PRPF38A PE=1 SV=1	1	3	3	3	1	1	1	0	1	2	1	1	0	2	1	1	1	0	1	2	1	1	0	2	1	1	1	0	1
tr|E7EUT5|E7EUT5_HUMAN	tr|E7EUT5|E7EUT5_HUMAN	1	1	1	1	0.629458	1	1	1	1	1397600	1	1	1	1	879730	4	3	0	tr|E7EUT5|E7EUT5_HUMAN Glyceraldehyde-3-phosphate dehydrogenase OS=Homo sapiens GN=GAPDH PE=1 SV=1	1	4	3	0	0	0	1	1	2	0	1	0	1	3	0	0	1	1	2	0	1	0	0	2	0	0	0	0	0
sp|Q9UHI6|DDX20_HUMAN	sp|Q9UHI6|DDX20_HUMAN	1	1	1	1	0.943052	1	1	1	1	874830	1	1	1	1	825010	4	4	4	sp|Q9UHI6|DDX20_HUMAN Probable ATP-dependent RNA helicase DDX20 OS=Homo sapiens GN=DDX20 PE=1 SV=2	1	4	4	4	1	0	2	0	2	0	0	1	0	2	1	0	2	0	2	0	0	1	0	2	1	0	2	0	2
tr|H0Y3N9|H0Y3N9_HUMAN;sp|Q9UPP1|PHF8_HUMAN;tr|H0Y589|H0Y589_HUMAN;tr|E7ET14|E7ET14_HUMAN;tr|A0A087WW48|A0A087WW48_HUMAN;sp|O75151|PHF2_HUMAN	tr|H0Y3N9|H0Y3N9_HUMAN;sp|Q9UPP1|PHF8_HUMAN;tr|H0Y589|H0Y589_HUMAN	1	1	1	1	1.02866	1	1	1	1	768610	1	1	1	1	790640	3;3;2;1;1;1	3;3;2;1;1;1	3;3;2;1;1;1	tr|H0Y3N9|H0Y3N9_HUMAN Histone lysine demethylase PHF8 (Fragment) OS=Homo sapiens GN=PHF8 PE=1 SV=1;sp|Q9UPP1|PHF8_HUMAN Histone lysine demethylase PHF8 OS=Homo sapiens GN=PHF8 PE=1 SV=3;tr|H0Y589|H0Y589_HUMAN Histone lysine demethylase PHF8 (Fragment) OS=	6	3	3	3	1	0	0	0	2	0	0	0	0	3	1	0	0	0	2	0	0	0	0	3	1	0	0	0	2
sp|O75821|EIF3G_HUMAN;tr|K7EP16|K7EP16_HUMAN;tr|K7ER90|K7ER90_HUMAN;tr|K7EL20|K7EL20_HUMAN;tr|K7ENA8|K7ENA8_HUMAN	sp|O75821|EIF3G_HUMAN;tr|K7EP16|K7EP16_HUMAN;tr|K7ER90|K7ER90_HUMAN;tr|K7EL20|K7EL20_HUMAN;tr|K7ENA8|K7ENA8_HUMAN	1	1	1.20347e-06	1	769420	1	1	830930	1	1	1	1	1	1	769420	2;1;1;1;1	2;1;1;1;1	2;1;1;1;1	sp|O75821|EIF3G_HUMAN Eukaryotic translation initiation factor 3 subunit G OS=Homo sapiens GN=EIF3G PE=1 SV=2;tr|K7EP16|K7EP16_HUMAN Eukaryotic translation initiation factor 3 subunit G (Fragment) OS=Homo sapiens GN=EIF3G PE=1 SV=1;tr|K7ER90|K7ER90_HUMAN E	5	2	2	2	0	1	2	0	0	0	0	0	0	2	0	1	2	0	0	0	0	0	0	2	0	1	2	0	0
sp|Q9H6Y2|WDR55_HUMAN	sp|Q9H6Y2|WDR55_HUMAN	1	1	1	1	754850	1	1	1	1	1	1	1	1	1	754850	1	1	1	sp|Q9H6Y2|WDR55_HUMAN WD repeat-containing protein 55 OS=Homo sapiens GN=WDR55 PE=1 SV=2	1	1	1	1	0	0	1	0	1	0	1	1	0	1	0	0	1	0	1	0	1	1	0	1	0	0	1	0	1
sp|Q9ULW3|ABT1_HUMAN	sp|Q9ULW3|ABT1_HUMAN	1	1	1	1	740110	1	1	1	1	1	1	1	1	1	740110	3	3	3	sp|Q9ULW3|ABT1_HUMAN Activator of basal transcription 1 OS=Homo sapiens GN=ABT1 PE=1 SV=1	1	3	3	3	1	1	1	0	0	1	0	0	0	2	1	1	1	0	0	1	0	0	0	2	1	1	1	0	0
sp|Q6UN15|FIP1_HUMAN;tr|A0A0B4J203|A0A0B4J203_HUMAN	sp|Q6UN15|FIP1_HUMAN;tr|A0A0B4J203|A0A0B4J203_HUMAN	1	1	9.73899e-07	1	707900	1	1	1026800	1	1	1	1	1	1	707900	4;3	4;3	4;3	sp|Q6UN15|FIP1_HUMAN Pre-mRNA 3-end-processing factor FIP1 OS=Homo sapiens GN=FIP1L1 PE=1 SV=1;tr|A0A0B4J203|A0A0B4J203_HUMAN Pre-mRNA 3-end-processing factor FIP1 OS=Homo sapiens GN=FIP1L1 PE=1 SV=1	2	4	4	4	0	0	3	0	0	2	1	0	0	2	0	0	3	0	0	2	1	0	0	2	0	0	3	0	0
sp|P62306|RUXF_HUMAN	sp|P62306|RUXF_HUMAN	1	1	1	1	684130	1	1	1	1	1	1	1	1	1	684130	1	1	1	sp|P62306|RUXF_HUMAN Small nuclear ribonucleoprotein F OS=Homo sapiens GN=SNRPF PE=1 SV=1	1	1	1	1	1	0	0	1	0	1	0	1	1	1	1	0	0	1	0	1	0	1	1	1	1	0	0	1	0
sp|O95625|ZBT11_HUMAN;tr|C9J2L2|C9J2L2_HUMAN	sp|O95625|ZBT11_HUMAN	1	1	1	1	674490	1	1	1	1	1	1	1	1	1	674490	3;1	3;1	3;1	sp|O95625|ZBT11_HUMAN Zinc finger and BTB domain-containing protein 11 OS=Homo sapiens GN=ZBTB11 PE=1 SV=2	2	3	3	3	1	1	1	0	1	1	2	0	0	2	1	1	1	0	1	1	2	0	0	2	1	1	1	0	1
tr|H7C5M9|H7C5M9_HUMAN	tr|H7C5M9|H7C5M9_HUMAN	1	1	1	1	658390	1	1	1	1	1	1	1	1	1	658390	80	1	1	tr|H7C5M9|H7C5M9_HUMAN Programmed cell death protein 10 (Fragment) OS=Homo sapiens GN=PDCD10 PE=1 SV=1	1	80	1	1	34	33	28	11	20	39	53	31	11	38	0	0	0	0	0	1	1	0	0	1	0	0	0	0	0
tr|B9ZVN9|B9ZVN9_HUMAN;sp|O95602|RPA1_HUMAN	tr|B9ZVN9|B9ZVN9_HUMAN;sp|O95602|RPA1_HUMAN	1	1	1	1	631700	1	1	1	1	1	1	1	1	1	631700	2;2	2;2	2;2	tr|B9ZVN9|B9ZVN9_HUMAN DNA-directed RNA polymerase OS=Homo sapiens GN=POLR1A PE=1 SV=1;sp|O95602|RPA1_HUMAN DNA-directed RNA polymerase I subunit RPA1 OS=Homo sapiens GN=POLR1A PE=1 SV=2	2	2	2	2	0	0	1	0	0	1	1	0	0	2	0	0	1	0	0	1	1	0	0	2	0	0	1	0	0
tr|S4R3H4|S4R3H4_HUMAN;tr|G3V3B0|G3V3B0_HUMAN;tr|E7EQT4|E7EQT4_HUMAN;sp|Q9UKV3|ACINU_HUMAN	tr|S4R3H4|S4R3H4_HUMAN;tr|G3V3B0|G3V3B0_HUMAN;tr|E7EQT4|E7EQT4_HUMAN;sp|Q9UKV3|ACINU_HUMAN	1	1	1.27938e-06	1	578350	1	1	781630	1	1	1	1	1	1	578350	4;3;3;3	4;3;3;3	4;3;3;3	tr|S4R3H4|S4R3H4_HUMAN Apoptotic chromatin condensation inducer in the nucleus OS=Homo sapiens GN=ACIN1 PE=1 SV=1;tr|G3V3B0|G3V3B0_HUMAN Apoptotic chromatin condensation inducer in the nucleus OS=Homo sapiens GN=ACIN1 PE=1 SV=1;tr|E7EQT4|E7EQT4_HUMAN Apopt	4	4	4	4	1	1	2	0	0	0	2	1	0	2	1	1	2	0	0	0	2	1	0	2	1	1	2	0	0
sp|Q5W0B1|RN219_HUMAN	sp|Q5W0B1|RN219_HUMAN	1	1	1	1	551140	1	1	1	1	1	1	1	1	1	551140	2	2	2	sp|Q5W0B1|RN219_HUMAN RING finger protein 219 OS=Homo sapiens GN=RNF219 PE=1 SV=1	1	2	2	2	0	1	0	1	0	0	0	0	0	1	0	1	0	1	0	0	0	0	0	1	0	1	0	1	0
sp|Q9BVQ7|SPA5L_HUMAN	sp|Q9BVQ7|SPA5L_HUMAN	1	1	1	1	518770	1	1	1	1	1	1	1	1	1	518770	1	1	1	sp|Q9BVQ7|SPA5L_HUMAN Spermatogenesis-associated protein 5-like protein 1 OS=Homo sapiens GN=SPATA5L1 PE=1 SV=2	1	1	1	1	0	1	1	0	0	1	1	0	0	1	0	1	1	0	0	1	1	0	0	1	0	1	1	0	0
tr|D6RDJ3|D6RDJ3_HUMAN;tr|H0Y723|H0Y723_HUMAN;sp|O15160|RPAC1_HUMAN;tr|E7EQB9|E7EQB9_HUMAN	tr|D6RDJ3|D6RDJ3_HUMAN;tr|H0Y723|H0Y723_HUMAN;sp|O15160|RPAC1_HUMAN;tr|E7EQB9|E7EQB9_HUMAN	1	1	1	1	500390	1	1	1	1	1	1	1	1	1	500390	2;2;2;2	2;2;2;2	2;2;2;2	tr|D6RDJ3|D6RDJ3_HUMAN DNA-directed RNA polymerases I and III subunit RPAC1 (Fragment) OS=Homo sapiens GN=POLR1C PE=1 SV=1;tr|H0Y723|H0Y723_HUMAN DNA-directed RNA polymerases I and III subunit RPAC1 (Fragment) OS=Homo sapiens GN=POLR1C PE=1 SV=1;sp|O15160|	4	2	2	2	2	1	1	0	1	1	0	0	0	1	2	1	1	0	1	1	0	0	0	1	2	1	1	0	1
sp|O43663|PRC1_HUMAN;tr|H0YL53|H0YL53_HUMAN	sp|O43663|PRC1_HUMAN;tr|H0YL53|H0YL53_HUMAN	1	1	1	1	490870	1	1	1	1	1	1	1	1	1	490870	2;1	2;1	2;1	sp|O43663|PRC1_HUMAN Protein regulator of cytokinesis 1 OS=Homo sapiens GN=PRC1 PE=1 SV=2;tr|H0YL53|H0YL53_HUMAN Protein regulator of cytokinesis 1 (Fragment) OS=Homo sapiens GN=PRC1 PE=1 SV=1	2	2	2	2	1	1	1	0	1	1	0	0	0	1	1	1	1	0	1	1	0	0	0	1	1	1	1	0	1
sp|P78345|RPP38_HUMAN	sp|P78345|RPP38_HUMAN	1	1	1	1	484950	1	1	1	1	1	1	1	1	1	484950	1	1	1	sp|P78345|RPP38_HUMAN Ribonuclease P protein subunit p38 OS=Homo sapiens GN=RPP38 PE=1 SV=2	1	1	1	1	1	1	0	0	0	0	1	0	0	1	1	1	0	0	0	0	1	0	0	1	1	1	0	0	0
sp|Q96SB8|SMC6_HUMAN;tr|C9JMN1|C9JMN1_HUMAN;tr|A0A0A0MRY1|A0A0A0MRY1_HUMAN	sp|Q96SB8|SMC6_HUMAN;tr|C9JMN1|C9JMN1_HUMAN;tr|A0A0A0MRY1|A0A0A0MRY1_HUMAN	1	1	1	1	482070	1	1	1	1	1	1	1	1	1	482070	4;4;2	4;4;2	4;4;2	sp|Q96SB8|SMC6_HUMAN Structural maintenance of chromosomes protein 6 OS=Homo sapiens GN=SMC6 PE=1 SV=2;tr|C9JMN1|C9JMN1_HUMAN Structural maintenance of chromosomes protein 6 (Fragment) OS=Homo sapiens GN=SMC6 PE=1 SV=1;tr|A0A0A0MRY1|A0A0A0MRY1_HUMAN Struct	3	4	4	4	0	0	1	0	0	1	1	0	0	1	0	0	1	0	0	1	1	0	0	1	0	0	1	0	0
sp|Q9BYE7|PCGF6_HUMAN	sp|Q9BYE7|PCGF6_HUMAN	1	1	1	1	479060	1	1	1	1	1	1	1	1	1	479060	2	2	2	sp|Q9BYE7|PCGF6_HUMAN Polycomb group RING finger protein 6 OS=Homo sapiens GN=PCGF6 PE=1 SV=2	1	2	2	2	0	1	0	0	0	0	0	0	0	1	0	1	0	0	0	0	0	0	0	1	0	1	0	0	0
sp|P04406|G3P_HUMAN	sp|P04406|G3P_HUMAN	1	1	1	1	448370	1	1	1	1	1	1	1	1	1	448370	4	1	1	sp|P04406|G3P_HUMAN Glyceraldehyde-3-phosphate dehydrogenase OS=Homo sapiens GN=GAPDH PE=1 SV=3	1	4	1	1	0	0	2	1	2	0	2	1	0	3	0	0	1	0	0	0	1	1	0	1	0	0	1	0	0
sp|Q9HCD5|NCOA5_HUMAN	sp|Q9HCD5|NCOA5_HUMAN	1	1	1	1	431620	1	1	1	1	1	1	1	1	1	431620	2	2	2	sp|Q9HCD5|NCOA5_HUMAN Nuclear receptor coactivator 5 OS=Homo sapiens GN=NCOA5 PE=1 SV=2	1	2	2	2	1	0	0	0	0	0	0	0	0	1	1	0	0	0	0	0	0	0	0	1	1	0	0	0	0
tr|H7C464|H7C464_HUMAN;tr|B7WPG3|B7WPG3_HUMAN;tr|C9IYN3|C9IYN3_HUMAN;tr|D6W592|D6W592_HUMAN;sp|Q8WVV9|HNRLL_HUMAN	tr|H7C464|H7C464_HUMAN;tr|B7WPG3|B7WPG3_HUMAN;tr|C9IYN3|C9IYN3_HUMAN;tr|D6W592|D6W592_HUMAN;sp|Q8WVV9|HNRLL_HUMAN	1	1	1	1	389630	1	1	1	1	1	1	1	1	1	389630	1;1;1;1;1	1;1;1;1;1	1;1;1;1;1	tr|H7C464|H7C464_HUMAN Heterogeneous nuclear ribonucleoprotein L-like (Fragment) OS=Homo sapiens GN=HNRNPLL PE=1 SV=1;tr|B7WPG3|B7WPG3_HUMAN Heterogeneous nuclear ribonucleoprotein L-like OS=Homo sapiens GN=HNRNPLL PE=1 SV=1;tr|C9IYN3|C9IYN3_HUMAN Heteroge	5	1	1	1	1	1	1	0	0	0	1	1	0	1	1	1	1	0	0	0	1	1	0	1	1	1	1	0	0
tr|H3BNX5|H3BNX5_HUMAN;sp|Q9H2Y7|ZN106_HUMAN	tr|H3BNX5|H3BNX5_HUMAN;sp|Q9H2Y7|ZN106_HUMAN	1	1	1	1	386400	1	1	1	1	1	1	1	1	1	386400	1;1	1;1	1;1	tr|H3BNX5|H3BNX5_HUMAN Zinc finger protein 106 (Fragment) OS=Homo sapiens GN=ZNF106 PE=1 SV=1;sp|Q9H2Y7|ZN106_HUMAN Zinc finger protein 106 OS=Homo sapiens GN=ZNF106 PE=1 SV=1	2	1	1	1	0	0	0	0	0	1	0	0	0	1	0	0	0	0	0	1	0	0	0	1	0	0	0	0	0
sp|O95816|BAG2_HUMAN	sp|O95816|BAG2_HUMAN	1	1	1	1	382760	1	1	1	1	1	1	1	1	1	382760	2	2	2	sp|O95816|BAG2_HUMAN BAG family molecular chaperone regulator 2 OS=Homo sapiens GN=BAG2 PE=1 SV=1	1	2	2	2	1	1	1	0	1	1	0	1	0	1	1	1	1	0	1	1	0	1	0	1	1	1	1	0	1
sp|P31153|METK2_HUMAN	sp|P31153|METK2_HUMAN	1	1	1	1	372870	1	1	1	1	1	1	1	1	1	372870	1	1	1	sp|P31153|METK2_HUMAN S-adenosylmethionine synthase isoform type-2 OS=Homo sapiens GN=MAT2A PE=1 SV=1	1	1	1	1	0	0	0	0	0	0	0	0	0	1	0	0	0	0	0	0	0	0	0	1	0	0	0	0	0
tr|H7C446|H7C446_HUMAN	tr|H7C446|H7C446_HUMAN	1	1	1	1	362780	1	1	1	1	1	1	1	1	1	362780	6	1	1	tr|H7C446|H7C446_HUMAN Suppressor of SWI4 1 homolog (Fragment) OS=Homo sapiens GN=PPAN PE=1 SV=1	1	6	1	1	2	3	3	1	3	1	3	2	3	4	0	0	0	0	0	0	0	0	0	1	0	0	0	0	0
sp|P61962|DCAF7_HUMAN;tr|A0A087WWI6|A0A087WWI6_HUMAN	sp|P61962|DCAF7_HUMAN;tr|A0A087WWI6|A0A087WWI6_HUMAN	1	1	1	1	362720	1	1	1	1	1	1	1	1	1	362720	2;1	2;1	2;1	sp|P61962|DCAF7_HUMAN DDB1- and CUL4-associated factor 7 OS=Homo sapiens GN=DCAF7 PE=1 SV=1;tr|A0A087WWI6|A0A087WWI6_HUMAN DDB1- and CUL4-associated factor 7 (Fragment) OS=Homo sapiens GN=DCAF7 PE=1 SV=3	2	2	2	2	0	1	1	0	0	0	2	0	0	1	0	1	1	0	0	0	2	0	0	1	0	1	1	0	0
tr|B0QY90|B0QY90_HUMAN;sp|Q9Y262|EIF3L_HUMAN;tr|B0QY89|B0QY89_HUMAN	tr|B0QY90|B0QY90_HUMAN;sp|Q9Y262|EIF3L_HUMAN;tr|B0QY89|B0QY89_HUMAN	1	1	1	1	362510	1	1	1	1	1	1	1	1	1	362510	1;1;1	1;1;1	1;1;1	tr|B0QY90|B0QY90_HUMAN Eukaryotic translation initiation factor 3 subunit L OS=Homo sapiens GN=EIF3L PE=1 SV=1;sp|Q9Y262|EIF3L_HUMAN Eukaryotic translation initiation factor 3 subunit L OS=Homo sapiens GN=EIF3L PE=1 SV=1;tr|B0QY89|B0QY89_HUMAN Eukaryotic t	3	1	1	1	0	1	0	0	0	0	1	0	0	1	0	1	0	0	0	0	1	0	0	1	0	1	0	0	0
sp|Q8N5F7|NKAP_HUMAN	sp|Q8N5F7|NKAP_HUMAN	1	1	1	1	340600	1	1	1	1	1	1	1	1	1	340600	1	1	1	sp|Q8N5F7|NKAP_HUMAN NF-kappa-B-activating protein OS=Homo sapiens GN=NKAP PE=1 SV=1	1	1	1	1	0	0	0	0	0	0	0	0	0	1	0	0	0	0	0	0	0	0	0	1	0	0	0	0	0
sp|P48651|PTSS1_HUMAN	sp|P48651|PTSS1_HUMAN	1	1	1	1	324110	1	1	1	1	1	1	1	1	1	324110	1	1	1	sp|P48651|PTSS1_HUMAN Phosphatidylserine synthase 1 OS=Homo sapiens GN=PTDSS1 PE=1 SV=1	1	1	1	1	1	1	0	0	1	0	0	0	0	1	1	1	0	0	1	0	0	0	0	1	1	1	0	0	1
sp|Q14151|SAFB2_HUMAN	sp|Q14151|SAFB2_HUMAN	1	1	1	1	316150	1	1	1	1	1	1	1	1	1	316150	5	2	2	sp|Q14151|SAFB2_HUMAN Scaffold attachment factor B2 OS=Homo sapiens GN=SAFB2 PE=1 SV=1	1	5	2	2	1	0	0	0	1	3	1	0	0	2	0	0	0	0	0	1	0	0	0	1	0	0	0	0	0
sp|Q6P1J9|CDC73_HUMAN	sp|Q6P1J9|CDC73_HUMAN	1	1	1	1	300490	1	1	1	1	1	1	1	1	1	300490	2	2	2	sp|Q6P1J9|CDC73_HUMAN Parafibromin OS=Homo sapiens GN=CDC73 PE=1 SV=1	1	2	2	2	0	1	1	0	0	0	0	0	0	1	0	1	1	0	0	0	0	0	0	1	0	1	1	0	0
tr|E5RJR5|E5RJR5_HUMAN;sp|P63208|SKP1_HUMAN	tr|E5RJR5|E5RJR5_HUMAN;sp|P63208|SKP1_HUMAN	1	1	1	1	285560	1	1	1	1	1	1	1	1	1	285560	1;1	1;1	1;1	tr|E5RJR5|E5RJR5_HUMAN S-phase kinase-associated protein 1 OS=Homo sapiens GN=SKP1 PE=1 SV=1;sp|P63208|SKP1_HUMAN S-phase kinase-associated protein 1 OS=Homo sapiens GN=SKP1 PE=1 SV=2	2	1	1	1	0	1	0	0	0	1	0	0	0	1	0	1	0	0	0	1	0	0	0	1	0	1	0	0	0
sp|Q96QC0|PP1RA_HUMAN	sp|Q96QC0|PP1RA_HUMAN	1	1	1	1	285140	1	1	1	1	1	1	1	1	1	285140	2	2	2	sp|Q96QC0|PP1RA_HUMAN Serine/threonine-protein phosphatase 1 regulatory subunit 10 OS=Homo sapiens GN=PPP1R10 PE=1 SV=1	1	2	2	2	0	0	1	0	0	0	0	0	0	1	0	0	1	0	0	0	0	0	0	1	0	0	1	0	0
sp|Q9UDY8|MALT1_HUMAN	sp|Q9UDY8|MALT1_HUMAN	1	1	1	64466000	1	1	1	1	1	1	1	1	1	64466000	1	1	1	1	sp|Q9UDY8|MALT1_HUMAN Mucosa-associated lymphoid tissue lymphoma translocation protein 1 OS=Homo sapiens GN=MALT1 PE=1 SV=1	1	1	1	1	0	0	0	0	0	0	0	0	1	0	0	0	0	0	0	0	0	0	1	0	0	0	0	0	0
sp|P62854|RS26_HUMAN;sp|Q5JNZ5|RS26L_HUMAN	sp|P62854|RS26_HUMAN;sp|Q5JNZ5|RS26L_HUMAN	1	1	7906700	0.710177	1	1	1	1	7816500	1	1	1	7906700	5551100	1	2;1	2;1	2;1	sp|P62854|RS26_HUMAN 40S ribosomal protein S26 OS=Homo sapiens GN=RPS26 PE=1 SV=3;sp|Q5JNZ5|RS26L_HUMAN Putative 40S ribosomal protein S26-like 1 OS=Homo sapiens GN=RPS26P11 PE=5 SV=1	2	2	2	2	1	1	1	2	0	0	1	2	2	0	1	1	1	2	0	0	1	2	2	0	1	1	1	2	0
tr|K7EMV3|K7EMV3_HUMAN;tr|B4DEB1|B4DEB1_HUMAN;tr|K7EK07|K7EK07_HUMAN;sp|Q71DI3|H32_HUMAN;sp|Q16695|H31T_HUMAN;sp|P84243|H33_HUMAN;sp|P68431|H31_HUMAN;tr|K7ES00|K7ES00_HUMAN;tr|K7EP01|K7EP01_HUMAN;sp|Q6NXT2|H3C_HUMAN	tr|K7EMV3|K7EMV3_HUMAN;tr|B4DEB1|B4DEB1_HUMAN;tr|K7EK07|K7EK07_HUMAN;sp|Q71DI3|H32_HUMAN;sp|Q16695|H31T_HUMAN;sp|P84243|H33_HUMAN;sp|P68431|H31_HUMAN;tr|K7ES00|K7ES00_HUMAN;tr|K7EP01|K7EP01_HUMAN;sp|Q6NXT2|H3C_HUMAN	1	1	1	3766600	1	1	1	1	1	1	1	1	1	3766600	1	2;2;2;2;2;2;2;2;1;1	1;1;1;1;1;1;1;1;0;0	1;1;1;1;1;1;1;1;0;0	tr|K7EMV3|K7EMV3_HUMAN Histone H3 OS=Homo sapiens GN=H3F3B PE=1 SV=1;tr|B4DEB1|B4DEB1_HUMAN Histone H3 OS=Homo sapiens GN=H3F3A PE=1 SV=1;tr|K7EK07|K7EK07_HUMAN Histone H3 (Fragment) OS=Homo sapiens GN=H3F3B PE=1 SV=1;sp|Q71DI3|H32_HUMAN Histone H3.2 OS=Ho	10	2	1	1	1	1	1	1	1	2	1	1	2	1	0	0	0	0	0	1	0	0	1	0	0	0	0	0	0
tr|E9PK91|E9PK91_HUMAN;tr|H0YF63|H0YF63_HUMAN	tr|E9PK91|E9PK91_HUMAN	1	1	1	3414500	1	1	1	1	1	1	1	1	1	3414500	1	37;8	1;1	1;1	tr|E9PK91|E9PK91_HUMAN Bcl-2-associated transcription factor 1 OS=Homo sapiens GN=BCLAF1 PE=1 SV=1	2	37	1	1	21	26	20	18	22	21	22	16	18	26	1	0	1	1	0	0	1	1	1	0	1	0	1	1	0
sp|Q02413|DSG1_HUMAN	sp|Q02413|DSG1_HUMAN	1	1	1	3017800	3.7011e-07	1	1	1	1	2701900	1	1	1	3017800	1	4	4	4	sp|Q02413|DSG1_HUMAN Desmoglein-1 OS=Homo sapiens GN=DSG1 PE=1 SV=2	1	4	4	4	0	0	0	1	4	0	0	0	2	0	0	0	0	1	4	0	0	0	2	0	0	0	0	1	4
tr|A0A087WVS8|A0A087WVS8_HUMAN;sp|Q70IA6|MOB2_HUMAN	tr|A0A087WVS8|A0A087WVS8_HUMAN;sp|Q70IA6|MOB2_HUMAN	1	1	1	732470	1	1	1	1	1	1	1	1	1	732470	1	3;3	3;3	3;3	tr|A0A087WVS8|A0A087WVS8_HUMAN MOB kinase activator 2 OS=Homo sapiens GN=MOB2 PE=1 SV=1;sp|Q70IA6|MOB2_HUMAN MOB kinase activator 2 OS=Homo sapiens GN=MOB2 PE=1 SV=1	2	3	3	3	0	0	0	0	0	1	2	0	1	0	0	0	0	0	0	1	2	0	1	0	0	0	0	0	0
sp|Q8TF72|SHRM3_HUMAN	sp|Q8TF72|SHRM3_HUMAN	1	1	29095000	1	1	1	1	1	1	1	1	1	29095000	1	1	1	1	1	sp|Q8TF72|SHRM3_HUMAN Protein Shroom3 OS=Homo sapiens GN=SHROOM3 PE=1 SV=2	1	1	1	1	1	1	1	0	1	0	0	1	0	0	1	1	1	0	1	0	0	1	0	0	1	1	1	0	1
sp|Q9NV31|IMP3_HUMAN	sp|Q9NV31|IMP3_HUMAN	1	1	3828100	4.49297e-07	1	1	1	1	2225700	1	1	1	3828100	1	1	5	5	5	sp|Q9NV31|IMP3_HUMAN U3 small nucleolar ribonucleoprotein protein IMP3 OS=Homo sapiens GN=IMP3 PE=1 SV=1	1	5	5	5	2	1	1	2	1	1	2	2	1	2	2	1	1	2	1	1	2	2	1	2	2	1	1	2	1
tr|H0YB78|H0YB78_HUMAN;tr|A0A0G2JNW7|A0A0G2JNW7_HUMAN;sp|Q9Y666|S12A7_HUMAN	tr|H0YB78|H0YB78_HUMAN;tr|A0A0G2JNW7|A0A0G2JNW7_HUMAN;sp|Q9Y666|S12A7_HUMAN	1	1	3496100	1	1	1	1	1	1	1	1	1	3496100	1	1	1;1;1	1;1;1	1;1;1	tr|H0YB78|H0YB78_HUMAN Solute carrier family 12 member 7 (Fragment) OS=Homo sapiens GN=SLC12A7 PE=1 SV=1;tr|A0A0G2JNW7|A0A0G2JNW7_HUMAN Solute carrier family 12 member 7 OS=Homo sapiens GN=SLC12A7 PE=4 SV=1;sp|Q9Y666|S12A7_HUMAN Solute carrier family 12 me	3	1	1	1	0	0	0	0	0	0	0	1	0	0	0	0	0	0	0	0	0	1	0	0	0	0	0	0	0
tr|H0Y4R1|H0Y4R1_HUMAN;sp|P12268|IMDH2_HUMAN;tr|E7ETK5|E7ETK5_HUMAN	tr|H0Y4R1|H0Y4R1_HUMAN;sp|P12268|IMDH2_HUMAN	1	1	3115800	1	1	1	1	1	1	1	1	1	3115800	1	1	6;6;2	6;6;2	6;6;2	tr|H0Y4R1|H0Y4R1_HUMAN Inosine-5-monophosphate dehydrogenase 2 (Fragment) OS=Homo sapiens GN=IMPDH2 PE=1 SV=1;sp|P12268|IMDH2_HUMAN Inosine-5-monophosphate dehydrogenase 2 OS=Homo sapiens GN=IMPDH2 PE=1 SV=2	3	6	6	6	1	0	0	0	0	0	1	3	0	2	1	0	0	0	0	0	1	3	0	2	1	0	0	0	0
sp|Q01130|SRSF2_HUMAN;sp|Q9BRL6|SRSF8_HUMAN;tr|J3QL05|J3QL05_HUMAN;tr|J3KP15|J3KP15_HUMAN	sp|Q01130|SRSF2_HUMAN;sp|Q9BRL6|SRSF8_HUMAN;tr|J3QL05|J3QL05_HUMAN;tr|J3KP15|J3KP15_HUMAN	1	1	1933900	1	1	1	1	1	1	1	1	1	1933900	1	1	2;2;2;2	2;2;2;2	2;2;2;2	sp|Q01130|SRSF2_HUMAN Serine/arginine-rich splicing factor 2 OS=Homo sapiens GN=SRSF2 PE=1 SV=4;sp|Q9BRL6|SRSF8_HUMAN Serine/arginine-rich splicing factor 8 OS=Homo sapiens GN=SRSF8 PE=1 SV=1;tr|J3QL05|J3QL05_HUMAN Serine/arginine-rich-splicing factor 2 (F	4	2	2	2	1	0	1	0	1	1	0	2	1	0	1	0	1	0	1	1	0	2	1	0	1	0	1	0	1
tr|A0A0A0MRR7|A0A0A0MRR7_HUMAN;sp|P09234|RU1C_HUMAN;tr|Q5TAL2|Q5TAL2_HUMAN	tr|A0A0A0MRR7|A0A0A0MRR7_HUMAN;sp|P09234|RU1C_HUMAN	1	1854100	1842600	1	9.14077e-07	1	1	1	1	1094000	1	1854100	1842600	1	1	3;3;1	3;3;1	3;3;1	tr|A0A0A0MRR7|A0A0A0MRR7_HUMAN U1 small nuclear ribonucleoprotein C OS=Homo sapiens GN=SNRPC PE=1 SV=1;sp|P09234|RU1C_HUMAN U1 small nuclear ribonucleoprotein C OS=Homo sapiens GN=SNRPC PE=1 SV=1	3	3	3	3	2	0	1	0	2	0	2	2	0	1	2	0	1	0	2	0	2	2	0	1	2	0	1	0	2
tr|K7EIN2|K7EIN2_HUMAN;sp|Q9BRJ7|SDOS_HUMAN;tr|K7ENA3|K7ENA3_HUMAN;tr|A0A0G2JL33|A0A0G2JL33_HUMAN;sp|Q96DE0|NUD16_HUMAN	tr|K7EIN2|K7EIN2_HUMAN;sp|Q9BRJ7|SDOS_HUMAN;tr|K7ENA3|K7ENA3_HUMAN;tr|A0A0G2JL33|A0A0G2JL33_HUMAN	1	1	1821500	1	1	1	1	1	1	1	1	1	1821500	1	1	6;6;4;3;1	6;6;4;3;1	6;6;4;3;1	tr|K7EIN2|K7EIN2_HUMAN Protein syndesmos (Fragment) OS=Homo sapiens GN=NUDT16L1 PE=1 SV=1;sp|Q9BRJ7|SDOS_HUMAN Protein syndesmos OS=Homo sapiens GN=NUDT16L1 PE=1 SV=1;tr|K7ENA3|K7ENA3_HUMAN Protein syndesmos OS=Homo sapiens GN=NUDT16L1 PE=1 SV=1;tr|A0A0G2J	5	6	6	6	0	3	2	1	1	1	1	2	0	2	0	3	2	1	1	1	1	2	0	2	0	3	2	1	1
sp|Q14669|TRIPC_HUMAN;tr|H7C2Y1|H7C2Y1_HUMAN	sp|Q14669|TRIPC_HUMAN	1	6.15536e-07	0.739003	1	1	1	1624600	2257500	1	1	1	1	1668300	1	1	4;1	4;1	4;1	sp|Q14669|TRIPC_HUMAN E3 ubiquitin-protein ligase TRIP12 OS=Homo sapiens GN=TRIP12 PE=1 SV=1	2	4	4	4	1	4	3	0	1	0	1	3	0	1	1	4	3	0	1	0	1	3	0	1	1	4	3	0	1
sp|Q5JVF3|PCID2_HUMAN	sp|Q5JVF3|PCID2_HUMAN	1	1	1.49919	1	1	1	1	1047900	1	1	1	1	1571000	1	1	3	3	3	sp|Q5JVF3|PCID2_HUMAN PCI domain-containing protein 2 OS=Homo sapiens GN=PCID2 PE=1 SV=2	1	3	3	3	2	1	2	0	0	1	2	2	0	0	2	1	2	0	0	1	2	2	0	0	2	1	2	0	0
sp|Q86V81|THOC4_HUMAN;tr|E9PB61|E9PB61_HUMAN	sp|Q86V81|THOC4_HUMAN;tr|E9PB61|E9PB61_HUMAN	1	1	1504900	1	1	1	1	1	1	1	1	1	1504900	1	1	1;1	1;1	1;1	sp|Q86V81|THOC4_HUMAN THO complex subunit 4 OS=Homo sapiens GN=ALYREF PE=1 SV=3;tr|E9PB61|E9PB61_HUMAN THO complex subunit 4 OS=Homo sapiens GN=ALYREF PE=1 SV=1	2	1	1	1	0	0	0	0	0	0	1	1	0	0	0	0	0	0	0	0	1	1	0	0	0	0	0	0	0
tr|J3QR07|J3QR07_HUMAN;sp|Q96MU7|YTDC1_HUMAN;tr|J3KRG5|J3KRG5_HUMAN	tr|J3QR07|J3QR07_HUMAN;sp|Q96MU7|YTDC1_HUMAN;tr|J3KRG5|J3KRG5_HUMAN	1	1	1378400	1	1	1	1	1	1	1	1	1	1378400	1	1	2;2;1	2;2;1	2;2;1	tr|J3QR07|J3QR07_HUMAN YTH domain-containing protein 1 OS=Homo sapiens GN=YTHDC1 PE=1 SV=1;sp|Q96MU7|YTDC1_HUMAN YTH domain-containing protein 1 OS=Homo sapiens GN=YTHDC1 PE=1 SV=3;tr|J3KRG5|J3KRG5_HUMAN YTH domain-containing protein 1 (Fragment) OS=Homo s	3	2	2	2	1	1	1	0	0	1	1	2	0	0	1	1	1	0	0	1	1	2	0	0	1	1	1	0	0
sp|Q8WUA2|PPIL4_HUMAN	sp|Q8WUA2|PPIL4_HUMAN	1	1	1288100	1	1	1	1	1	1	1	1	1	1288100	1	1	3	3	3	sp|Q8WUA2|PPIL4_HUMAN Peptidyl-prolyl cis-trans isomerase-like 4 OS=Homo sapiens GN=PPIL4 PE=1 SV=1	1	3	3	3	0	0	1	0	0	0	1	2	0	1	0	0	1	0	0	0	1	2	0	1	0	0	1	0	0
tr|F8WE65|F8WE65_HUMAN;tr|C9J5S7|C9J5S7_HUMAN;sp|P62937|PPIA_HUMAN	tr|F8WE65|F8WE65_HUMAN;tr|C9J5S7|C9J5S7_HUMAN;sp|P62937|PPIA_HUMAN	1	1	1177500	1	1	1	1	1	1	1	1	1	1177500	1	1	2;2;2	2;2;2	2;2;2	tr|F8WE65|F8WE65_HUMAN Peptidyl-prolyl cis-trans isomerase OS=Homo sapiens GN=PPIA PE=1 SV=1;tr|C9J5S7|C9J5S7_HUMAN Peptidyl-prolyl cis-trans isomerase OS=Homo sapiens GN=PPIA PE=1 SV=1;sp|P62937|PPIA_HUMAN Peptidyl-prolyl cis-trans isomerase A OS=Homo sap	3	2	2	2	0	0	1	0	1	1	1	2	0	0	0	0	1	0	1	1	1	2	0	0	0	0	1	0	1
tr|E9PIN3|E9PIN3_HUMAN;sp|Q9UBU9|NXF1_HUMAN;tr|B4E227|B4E227_HUMAN;tr|E9PLA7|E9PLA7_HUMAN	tr|E9PIN3|E9PIN3_HUMAN;sp|Q9UBU9|NXF1_HUMAN;tr|B4E227|B4E227_HUMAN	1	1	1.25084	1	1	1	1	934970	1	1	1	1	1169500	1	1	3;3;2;1	3;3;2;1	3;3;2;1	tr|E9PIN3|E9PIN3_HUMAN Nuclear RNA export factor 1 (Fragment) OS=Homo sapiens GN=NXF1 PE=1 SV=1;sp|Q9UBU9|NXF1_HUMAN Nuclear RNA export factor 1 OS=Homo sapiens GN=NXF1 PE=1 SV=1;tr|B4E227|B4E227_HUMAN Nuclear RNA export factor 1 OS=Homo sapiens GN=NXF1 PE	4	3	3	3	0	1	2	0	0	0	1	2	0	1	0	1	2	0	0	0	1	2	0	1	0	1	2	0	0
tr|A0A087WUT6|A0A087WUT6_HUMAN;sp|O60841|IF2P_HUMAN	tr|A0A087WUT6|A0A087WUT6_HUMAN;sp|O60841|IF2P_HUMAN	1	1	0.96365	1	1	1	1	1213200	1	1	1	1	1169100	1	1	5;5	5;5	5;5	tr|A0A087WUT6|A0A087WUT6_HUMAN Eukaryotic translation initiation factor 5B OS=Homo sapiens GN=EIF5B PE=1 SV=1;sp|O60841|IF2P_HUMAN Eukaryotic translation initiation factor 5B OS=Homo sapiens GN=EIF5B PE=1 SV=4	2	5	5	5	1	1	3	0	2	1	0	2	0	1	1	1	3	0	2	1	0	2	0	1	1	1	3	0	2
tr|I3L3P7|I3L3P7_HUMAN;tr|I3L246|I3L246_HUMAN;sp|P62244|RS15A_HUMAN;tr|H3BN98|H3BN98_HUMAN;tr|H3BV27|H3BV27_HUMAN;tr|H3BT37|H3BT37_HUMAN;tr|I3L303|I3L303_HUMAN	tr|I3L3P7|I3L3P7_HUMAN;tr|I3L246|I3L246_HUMAN;sp|P62244|RS15A_HUMAN;tr|H3BN98|H3BN98_HUMAN;tr|H3BV27|H3BV27_HUMAN;tr|H3BT37|H3BT37_HUMAN;tr|I3L303|I3L303_HUMAN	1	1064600	1160700	1	1	1	1	1	1	1	1	1064600	1160700	1	1	2;2;2;2;1;1;1	2;2;2;2;1;1;1	2;2;2;2;1;1;1	tr|I3L3P7|I3L3P7_HUMAN 40S ribosomal protein S15a OS=Homo sapiens GN=RPS15A PE=1 SV=1;tr|I3L246|I3L246_HUMAN 40S ribosomal protein S15a OS=Homo sapiens GN=RPS15A PE=1 SV=1;sp|P62244|RS15A_HUMAN 40S ribosomal protein S15a OS=Homo sapiens GN=RPS15A PE=1 SV=2	7	2	2	2	0	1	0	0	0	1	2	2	0	0	0	1	0	0	0	1	2	2	0	0	0	1	0	0	0
tr|H7C1I8|H7C1I8_HUMAN	tr|H7C1I8|H7C1I8_HUMAN	1	1	1139300	1	1	1	1	1	1	1	1	1	1139300	1	1	1	1	1	tr|H7C1I8|H7C1I8_HUMAN Probable C-mannosyltransferase DPY19L1 (Fragment) OS=Homo sapiens GN=DPY19L1 PE=1 SV=1	1	1	1	1	0	1	0	0	0	0	0	1	0	0	0	1	0	0	0	0	0	1	0	0	0	1	0	0	0
sp|P01605|KV113_HUMAN	sp|P01605|KV113_HUMAN	1	1	1088900	1	1	1	1	1	1	1	1	1	1088900	1	1	1	1	1	sp|P01605|KV113_HUMAN Ig kappa chain V-I region Lay OS=Homo sapiens PE=1 SV=1	1	1	1	1	0	1	1	0	0	0	0	1	0	0	0	1	1	0	0	0	0	1	0	0	0	1	1	0	0
sp|Q5VTL8|PR38B_HUMAN;tr|Q9BRG6|Q9BRG6_HUMAN	sp|Q5VTL8|PR38B_HUMAN;tr|Q9BRG6|Q9BRG6_HUMAN	1	1	1005900	1	1	1	1	1	1	1	1	1	1005900	1	1	4;2	4;2	4;2	sp|Q5VTL8|PR38B_HUMAN Pre-mRNA-splicing factor 38B OS=Homo sapiens GN=PRPF38B PE=1 SV=1;tr|Q9BRG6|Q9BRG6_HUMAN APOL4 protein OS=Homo sapiens GN=APOL4 PE=1 SV=1	2	4	4	4	0	0	0	0	0	1	0	2	0	1	0	0	0	0	0	1	0	2	0	1	0	0	0	0	0
sp|O00505|IMA4_HUMAN;tr|H0Y4S9|H0Y4S9_HUMAN	sp|O00505|IMA4_HUMAN;tr|H0Y4S9|H0Y4S9_HUMAN	1	1	1003100	1	1	1	1	1	1	1	1	1	1003100	1	1	3;2	3;2	2;2	sp|O00505|IMA4_HUMAN Importin subunit alpha-4 OS=Homo sapiens GN=KPNA3 PE=1 SV=2;tr|H0Y4S9|H0Y4S9_HUMAN Importin subunit alpha-4 (Fragment) OS=Homo sapiens GN=KPNA3 PE=1 SV=1	2	3	3	2	1	3	1	0	0	1	2	2	0	1	1	3	1	0	0	1	2	2	0	1	1	2	1	0	0
sp|Q8N163|CCAR2_HUMAN;tr|H0YC69|H0YC69_HUMAN;tr|E5RGU7|E5RGU7_HUMAN;tr|E5RFJ3|E5RFJ3_HUMAN;tr|H0YC58|H0YC58_HUMAN;tr|E5RHJ4|E5RHJ4_HUMAN	sp|Q8N163|CCAR2_HUMAN;tr|H0YC69|H0YC69_HUMAN;tr|E5RGU7|E5RGU7_HUMAN;tr|E5RFJ3|E5RFJ3_HUMAN;tr|H0YC58|H0YC58_HUMAN;tr|E5RHJ4|E5RHJ4_HUMAN	1	1	996250	1	1	1	1	1	1	1	1	1	996250	1	1	2;1;1;1;1;1	2;1;1;1;1;1	2;1;1;1;1;1	sp|Q8N163|CCAR2_HUMAN Cell cycle and apoptosis regulator protein 2 OS=Homo sapiens GN=CCAR2 PE=1 SV=2;tr|H0YC69|H0YC69_HUMAN Cell cycle and apoptosis regulator protein 2 (Fragment) OS=Homo sapiens GN=CCAR2 PE=1 SV=1;tr|E5RGU7|E5RGU7_HUMAN Cell cycle and ap	6	2	2	2	0	0	0	0	0	0	0	2	0	0	0	0	0	0	0	0	0	2	0	0	0	0	0	0	0
sp|Q16514|TAF12_HUMAN	sp|Q16514|TAF12_HUMAN	1	1	994320	1	1	1	1	1	1	1	1	1	994320	1	1	2	2	2	sp|Q16514|TAF12_HUMAN Transcription initiation factor TFIID subunit 12 OS=Homo sapiens GN=TAF12 PE=1 SV=1	1	2	2	2	1	1	1	1	1	1	1	2	0	1	1	1	1	1	1	1	1	2	0	1	1	1	1	1	1
sp|O60506|HNRPQ_HUMAN;tr|B7Z645|B7Z645_HUMAN;tr|F6UXX1|F6UXX1_HUMAN	sp|O60506|HNRPQ_HUMAN;tr|B7Z645|B7Z645_HUMAN;tr|F6UXX1|F6UXX1_HUMAN	1	1	944170	1	1	1	1	1	1	1	1	1	944170	1	1	3;3;2	1;1;1	1;1;1	sp|O60506|HNRPQ_HUMAN Heterogeneous nuclear ribonucleoprotein Q OS=Homo sapiens GN=SYNCRIP PE=1 SV=2;tr|B7Z645|B7Z645_HUMAN Heterogeneous nuclear ribonucleoprotein Q OS=Homo sapiens GN=SYNCRIP PE=1 SV=1;tr|F6UXX1|F6UXX1_HUMAN Heterogeneous nuclear ribonucl	3	3	1	1	3	2	3	0	2	1	3	3	0	2	1	1	1	0	1	0	1	1	0	0	1	1	1	0	1
tr|G3V5S9|G3V5S9_HUMAN;sp|Q9Y324|FCF1_HUMAN;tr|B7ZB24|B7ZB24_HUMAN	tr|G3V5S9|G3V5S9_HUMAN;sp|Q9Y324|FCF1_HUMAN;tr|B7ZB24|B7ZB24_HUMAN	1	1	915230	1	1	1	1	1	1	1	1	1	915230	1	1	3;3;3	3;3;3	3;3;3	tr|G3V5S9|G3V5S9_HUMAN rRNA-processing protein FCF1 homolog OS=Homo sapiens GN=FCF1 PE=1 SV=1;sp|Q9Y324|FCF1_HUMAN rRNA-processing protein FCF1 homolog OS=Homo sapiens GN=FCF1 PE=2 SV=1;tr|B7ZB24|B7ZB24_HUMAN Multiple PDZ domain protein OS=Homo sapiens GN=	3	3	3	3	1	2	1	0	0	1	2	2	0	1	1	2	1	0	0	1	2	2	0	1	1	2	1	0	0
tr|A2AB09|A2AB09_HUMAN;sp|O75955|FLOT1_HUMAN	tr|A2AB09|A2AB09_HUMAN;sp|O75955|FLOT1_HUMAN	1	1	888220	1	1	1	1	1	1	1	1	1	888220	1	1	1;1	1;1	1;1	tr|A2AB09|A2AB09_HUMAN Flotillin-1 (Fragment) OS=Homo sapiens GN=FLOT1 PE=1 SV=1;sp|O75955|FLOT1_HUMAN Flotillin-1 OS=Homo sapiens GN=FLOT1 PE=1 SV=3	2	1	1	1	0	1	0	0	0	0	0	1	0	0	0	1	0	0	0	0	0	1	0	0	0	1	0	0	0
sp|P35580|MYH10_HUMAN;sp|P35749|MYH11_HUMAN;tr|B1PS43|B1PS43_HUMAN	sp|P35580|MYH10_HUMAN	1	1244100	869730	1	1	1	1	1	1	1	1	1244100	869730	1	1	5;2;2	5;2;2	3;2;2	sp|P35580|MYH10_HUMAN Myosin-10 OS=Homo sapiens GN=MYH10 PE=1 SV=3	3	5	5	3	0	0	0	0	1	4	2	4	0	2	0	0	0	0	1	4	2	4	0	2	0	0	0	0	0
sp|P55884|EIF3B_HUMAN	sp|P55884|EIF3B_HUMAN	1	1	805740	1	1	1	1	1	1	1	1	1	805740	1	1	1	1	1	sp|P55884|EIF3B_HUMAN Eukaryotic translation initiation factor 3 subunit B OS=Homo sapiens GN=EIF3B PE=1 SV=3	1	1	1	1	1	0	1	0	1	1	0	1	0	0	1	0	1	0	1	1	0	1	0	0	1	0	1	0	1
sp|Q6P6C2|ALKB5_HUMAN	sp|Q6P6C2|ALKB5_HUMAN	1	1	664610	1	1	1	1	1	1	1	1	1	664610	1	1	1	1	1	sp|Q6P6C2|ALKB5_HUMAN RNA demethylase ALKBH5 OS=Homo sapiens GN=ALKBH5 PE=1 SV=2	1	1	1	1	1	1	1	0	0	0	0	1	0	0	1	1	1	0	0	0	0	1	0	0	1	1	1	0	0
sp|Q9UHX1|PUF60_HUMAN;tr|E9PQ56|E9PQ56_HUMAN;tr|H0YEM1|H0YEM1_HUMAN;tr|E9PMU7|E9PMU7_HUMAN;tr|E9PN18|E9PN18_HUMAN;tr|E9PL19|E9PL19_HUMAN;tr|H0YCP8|H0YCP8_HUMAN	sp|Q9UHX1|PUF60_HUMAN;tr|E9PQ56|E9PQ56_HUMAN;tr|H0YEM1|H0YEM1_HUMAN;tr|E9PMU7|E9PMU7_HUMAN;tr|E9PN18|E9PN18_HUMAN	1	1	627170	1	1	1	1	1	1	1	1	1	627170	1	1	5;4;4;3;3;2;1	5;4;4;3;3;2;1	5;4;4;3;3;2;1	sp|Q9UHX1|PUF60_HUMAN Poly(U)-binding-splicing factor PUF60 OS=Homo sapiens GN=PUF60 PE=1 SV=1;tr|E9PQ56|E9PQ56_HUMAN Poly(U)-binding-splicing factor PUF60 (Fragment) OS=Homo sapiens GN=PUF60 PE=1 SV=5;tr|H0YEM1|H0YEM1_HUMAN Poly(U)-binding-splicing factor	7	5	5	5	0	1	1	0	0	1	1	2	0	1	0	1	1	0	0	1	1	2	0	1	0	1	1	0	0
sp|Q9NX58|LYAR_HUMAN	sp|Q9NX58|LYAR_HUMAN	1	1	616360	1	1	1	1	1	1	1	1	1	616360	1	1	1	1	1	sp|Q9NX58|LYAR_HUMAN Cell growth-regulating nucleolar protein OS=Homo sapiens GN=LYAR PE=1 SV=2	1	1	1	1	0	0	1	0	0	0	1	1	0	0	0	0	1	0	0	0	1	1	0	0	0	0	1	0	0
sp|P10599|THIO_HUMAN	sp|P10599|THIO_HUMAN	1	1	569380	1	1	1	1	1	1	1	1	1	569380	1	1	2	2	2	sp|P10599|THIO_HUMAN Thioredoxin OS=Homo sapiens GN=TXN PE=1 SV=3	1	2	2	2	0	1	0	1	0	0	1	1	0	0	0	1	0	1	0	0	1	1	0	0	0	1	0	1	0
sp|P50990|TCPQ_HUMAN;tr|H7C2U0|H7C2U0_HUMAN;tr|H7C4C8|H7C4C8_HUMAN	sp|P50990|TCPQ_HUMAN;tr|H7C2U0|H7C2U0_HUMAN;tr|H7C4C8|H7C4C8_HUMAN	1	1	530780	1	1	1	1	1	1	1	1	1	530780	1	1	2;1;1	2;1;1	2;1;1	sp|P50990|TCPQ_HUMAN T-complex protein 1 subunit theta OS=Homo sapiens GN=CCT8 PE=1 SV=4;tr|H7C2U0|H7C2U0_HUMAN T-complex protein 1 subunit theta (Fragment) OS=Homo sapiens GN=CCT8 PE=1 SV=1;tr|H7C4C8|H7C4C8_HUMAN T-complex protein 1 subunit theta (Fragmen	3	2	2	2	1	1	1	0	1	1	1	1	0	0	1	1	1	0	1	1	1	1	0	0	1	1	1	0	1
sp|Q92576|PHF3_HUMAN;tr|E7ER40|E7ER40_HUMAN;tr|E7EVH3|E7EVH3_HUMAN;tr|D6R9X2|D6R9X2_HUMAN;tr|E9PE34|E9PE34_HUMAN;tr|B3KP41|B3KP41_HUMAN	sp|Q92576|PHF3_HUMAN;tr|E7ER40|E7ER40_HUMAN;tr|E7EVH3|E7EVH3_HUMAN	1	1	470780	1	1	1	1	1	1	1	1	1	470780	1	1	4;3;2;1;1;1	4;3;2;1;1;1	4;3;2;1;1;1	sp|Q92576|PHF3_HUMAN PHD finger protein 3 OS=Homo sapiens GN=PHF3 PE=1 SV=3;tr|E7ER40|E7ER40_HUMAN PHD finger protein 3 (Fragment) OS=Homo sapiens GN=PHF3 PE=1 SV=5;tr|E7EVH3|E7EVH3_HUMAN PHD finger protein 3 (Fragment) OS=Homo sapiens GN=PHF3 PE=1 SV=1	6	4	4	4	0	0	1	0	0	2	1	1	0	0	0	0	1	0	0	2	1	1	0	0	0	0	1	0	0
tr|Q6ICH2|Q6ICH2_HUMAN;sp|Q96AK3|ABC3D_HUMAN;tr|A0A087WX48|A0A087WX48_HUMAN;sp|Q9NRW3|ABC3C_HUMAN;sp|Q8IUX4|ABC3F_HUMAN	tr|Q6ICH2|Q6ICH2_HUMAN;sp|Q96AK3|ABC3D_HUMAN;tr|A0A087WX48|A0A087WX48_HUMAN;sp|Q9NRW3|ABC3C_HUMAN;sp|Q8IUX4|ABC3F_HUMAN	1	1	468050	1	1	1	1	1	1	1	1	1	468050	1	1	2;2;1;1;1	1;1;1;1;1	1;1;1;1;1	tr|Q6ICH2|Q6ICH2_HUMAN BK150C2.9 protein OS=Homo sapiens GN=bK150C2.9 PE=1 SV=1;sp|Q96AK3|ABC3D_HUMAN DNA dC->dU-editing enzyme APOBEC-3D OS=Homo sapiens GN=APOBEC3D PE=1 SV=1;tr|A0A087WX48|A0A087WX48_HUMAN DNA dC->dU-editing enzyme APOBEC-3D OS=Homo sapie	5	2	1	1	1	1	1	0	0	1	1	1	0	1	0	1	0	0	0	1	1	1	0	0	0	1	0	0	0
sp|P83881|RL36A_HUMAN;tr|H0Y5B4|H0Y5B4_HUMAN;tr|H7BZ11|H7BZ11_HUMAN;tr|J3KQN4|J3KQN4_HUMAN;tr|H7BY91|H7BY91_HUMAN;tr|H0Y3V9|H0Y3V9_HUMAN;tr|R4GN19|R4GN19_HUMAN;sp|Q969Q0|RL36L_HUMAN	sp|P83881|RL36A_HUMAN;tr|H0Y5B4|H0Y5B4_HUMAN;tr|H7BZ11|H7BZ11_HUMAN;tr|J3KQN4|J3KQN4_HUMAN;tr|H7BY91|H7BY91_HUMAN;tr|H0Y3V9|H0Y3V9_HUMAN	1	1	442550	1	1	1	1	1	1	1	1	1	442550	1	1	3;3;3;3;2;2;1;1	3;3;3;3;2;2;1;1	3;3;3;3;2;2;1;1	sp|P83881|RL36A_HUMAN 60S ribosomal protein L36a OS=Homo sapiens GN=RPL36A PE=1 SV=2;tr|H0Y5B4|H0Y5B4_HUMAN 60S ribosomal protein L36a OS=Homo sapiens GN=RPL36A PE=3 SV=2;tr|H7BZ11|H7BZ11_HUMAN Protein RPL36A-HNRNPH2 OS=Homo sapiens GN=RPL36A-HNRNPH2 PE=3	8	3	3	3	1	0	1	0	0	1	1	1	0	0	1	0	1	0	0	1	1	1	0	0	1	0	1	0	0
sp|Q8N1G0|ZN687_HUMAN;tr|F8WCX2|F8WCX2_HUMAN;tr|H0Y5I5|H0Y5I5_HUMAN	sp|Q8N1G0|ZN687_HUMAN;tr|F8WCX2|F8WCX2_HUMAN;tr|H0Y5I5|H0Y5I5_HUMAN	1	1	429280	1	1	1	1	1	1	1	1	1	429280	1	1	2;2;1	2;2;1	2;2;1	sp|Q8N1G0|ZN687_HUMAN Zinc finger protein 687 OS=Homo sapiens GN=ZNF687 PE=1 SV=1;tr|F8WCX2|F8WCX2_HUMAN Zinc finger protein 687 OS=Homo sapiens GN=ZNF687 PE=1 SV=1;tr|H0Y5I5|H0Y5I5_HUMAN Zinc finger protein 687 (Fragment) OS=Homo sapiens GN=ZNF687 PE=1 SV	3	2	2	2	0	0	2	0	0	0	1	1	0	0	0	0	2	0	0	0	1	1	0	0	0	0	2	0	0
tr|F8W0Q9|F8W0Q9_HUMAN	tr|F8W0Q9|F8W0Q9_HUMAN	1	1	378480	1	1	1	1	1	1	1	1	1	378480	1	1	8	1	1	tr|F8W0Q9|F8W0Q9_HUMAN Periphilin-1 OS=Homo sapiens GN=PPHLN1 PE=1 SV=1	1	8	1	1	4	5	5	2	3	5	4	3	1	4	0	0	1	0	0	0	0	1	0	0	0	0	1	0	0
sp|Q9P013|CWC15_HUMAN	sp|Q9P013|CWC15_HUMAN	1	1	366900	1	1	1	1	1	1	1	1	1	366900	1	1	2	2	2	sp|Q9P013|CWC15_HUMAN Spliceosome-associated protein CWC15 homolog OS=Homo sapiens GN=CWC15 PE=1 SV=2	1	2	2	2	0	0	0	0	0	0	0	1	0	1	0	0	0	0	0	0	0	1	0	1	0	0	0	0	0
sp|Q8NB90|SPAT5_HUMAN;tr|J3QRR3|J3QRR3_HUMAN;tr|J3QRW1|J3QRW1_HUMAN;tr|J3QLH6|J3QLH6_HUMAN;tr|J3KRP2|J3KRP2_HUMAN;tr|J3QSA9|J3QSA9_HUMAN;tr|J3QQM1|J3QQM1_HUMAN;sp|P62195|PRS8_HUMAN	sp|Q8NB90|SPAT5_HUMAN	1	1	273180	1	1	1	1	1	1	1	1	1	273180	1	1	4;1;1;1;1;1;1;1	4;1;1;1;1;1;1;1	4;1;1;1;1;1;1;1	sp|Q8NB90|SPAT5_HUMAN Spermatogenesis-associated protein 5 OS=Homo sapiens GN=SPATA5 PE=1 SV=3	8	4	4	4	1	0	1	0	0	1	1	1	0	0	1	0	1	0	0	1	1	1	0	0	1	0	1	0	0
sp|Q15424|SAFB1_HUMAN;tr|K7ES42|K7ES42_HUMAN;tr|K7EII0|K7EII0_HUMAN	sp|Q15424|SAFB1_HUMAN	1	2415000	1	1	1	1	1	1	1	1	1	2415000	1	1	1	9;2;2	9;2;2	6;2;2	sp|Q15424|SAFB1_HUMAN Scaffold attachment factor B1 OS=Homo sapiens GN=SAFB PE=1 SV=4	3	9	9	6	2	2	2	0	1	3	3	2	0	1	2	2	2	0	1	3	3	2	0	1	1	2	2	0	0
sp|P0CW22|RS17L_HUMAN;sp|P08708|RS17_HUMAN;tr|H0YN88|H0YN88_HUMAN;tr|A0A075B716|A0A075B716_HUMAN;tr|H0YN73|H0YN73_HUMAN;tr|H3BNC9|H3BNC9_HUMAN	sp|P0CW22|RS17L_HUMAN;sp|P08708|RS17_HUMAN;tr|H0YN88|H0YN88_HUMAN;tr|A0A075B716|A0A075B716_HUMAN;tr|H0YN73|H0YN73_HUMAN;tr|H3BNC9|H3BNC9_HUMAN	1	1815500	5.05382e-07	1	1	1	1	1978700	1	1	1	1815500	1	1	1	4;4;4;4;2;2	4;4;4;4;2;2	4;4;4;4;2;2	sp|P0CW22|RS17L_HUMAN 40S ribosomal protein S17-like OS=Homo sapiens GN=RPS17L PE=1 SV=1;sp|P08708|RS17_HUMAN 40S ribosomal protein S17 OS=Homo sapiens GN=RPS17 PE=1 SV=2;tr|H0YN88|H0YN88_HUMAN 40S ribosomal protein S17 OS=Homo sapiens GN=RPS17 PE=1 SV=1;t	6	4	4	4	1	1	4	0	0	1	2	1	0	0	1	1	4	0	0	1	2	1	0	0	1	1	4	0	0
sp|Q15427|SF3B4_HUMAN;tr|Q5SZ64|Q5SZ64_HUMAN	sp|Q15427|SF3B4_HUMAN;tr|Q5SZ64|Q5SZ64_HUMAN	1	1806800	1	1	1	1	1	1	1	1	1	1806800	1	1	1	2;1	2;1	2;1	sp|Q15427|SF3B4_HUMAN Splicing factor 3B subunit 4 OS=Homo sapiens GN=SF3B4 PE=1 SV=1;tr|Q5SZ64|Q5SZ64_HUMAN Splicing factor 3B subunit 4 (Fragment) OS=Homo sapiens GN=SF3B4 PE=1 SV=1	2	2	2	2	1	1	1	1	1	1	2	1	1	1	1	1	1	1	1	1	2	1	1	1	1	1	1	1	1
sp|Q03252|LMNB2_HUMAN;tr|A8MZF5|A8MZF5_HUMAN	sp|Q03252|LMNB2_HUMAN;tr|A8MZF5|A8MZF5_HUMAN	1	1.00601	6.97058e-07	1	1	1	1681300	1434600	1	1	1	1691400	1	1	1	11;11	9;9	9;9	sp|Q03252|LMNB2_HUMAN Lamin-B2 OS=Homo sapiens GN=LMNB2 PE=1 SV=3;tr|A8MZF5|A8MZF5_HUMAN Post-GPI attachment to proteins factor 2 OS=Homo sapiens GN=PGAP2 PE=4 SV=3	2	11	9	9	5	5	4	1	1	3	5	1	0	1	3	5	4	0	0	1	5	1	0	1	3	5	4	0	0
tr|E9PL09|E9PL09_HUMAN;tr|H0YEU2|H0YEU2_HUMAN	tr|E9PL09|E9PL09_HUMAN;tr|H0YEU2|H0YEU2_HUMAN	1	1557700	1	1	1	1	1	1	1	1	1	1557700	1	1	1	14;10	1;1	0;0	tr|E9PL09|E9PL09_HUMAN 40S ribosomal protein S3 OS=Homo sapiens GN=RPS3 PE=1 SV=1;tr|H0YEU2|H0YEU2_HUMAN 40S ribosomal protein S3 (Fragment) OS=Homo sapiens GN=RPS3 PE=1 SV=1	2	14	1	0	11	11	10	4	9	12	8	10	4	7	1	1	0	0	1	1	1	0	0	0	0	0	0	0	0
sp|Q9NRX1|PNO1_HUMAN;tr|F8WBJ6|F8WBJ6_HUMAN	sp|Q9NRX1|PNO1_HUMAN	1	1538900	1	1	1	1	1	1	1	1	1	1538900	1	1	1	4;1	4;1	4;1	sp|Q9NRX1|PNO1_HUMAN RNA-binding protein PNO1 OS=Homo sapiens GN=PNO1 PE=1 SV=1	2	4	4	4	1	2	1	0	1	1	2	2	0	1	1	2	1	0	1	1	2	2	0	1	1	2	1	0	1
tr|A0A087WWY3|A0A087WWY3_HUMAN;tr|Q5HY54|Q5HY54_HUMAN;sp|P21333|FLNA_HUMAN;tr|Q60FE5|Q60FE5_HUMAN;tr|F8WE98|F8WE98_HUMAN;sp|O75369|FLNB_HUMAN;sp|Q14315|FLNC_HUMAN	tr|A0A087WWY3|A0A087WWY3_HUMAN;tr|Q5HY54|Q5HY54_HUMAN;sp|P21333|FLNA_HUMAN;tr|Q60FE5|Q60FE5_HUMAN;tr|F8WE98|F8WE98_HUMAN	1	1412100	1	1	1	1	1	1	1	1	1	1412100	1	1	1	6;6;6;6;4;1;1	6;6;6;6;4;1;1	6;6;6;6;4;1;1	tr|A0A087WWY3|A0A087WWY3_HUMAN Filamin-A OS=Homo sapiens GN=FLNA PE=1 SV=1;tr|Q5HY54|Q5HY54_HUMAN Filamin-A OS=Homo sapiens GN=FLNA PE=1 SV=1;sp|P21333|FLNA_HUMAN Filamin-A OS=Homo sapiens GN=FLNA PE=1 SV=4;tr|Q60FE5|Q60FE5_HUMAN Filamin A OS=Homo sapiens	7	6	6	6	1	2	1	0	0	0	4	2	0	0	1	2	1	0	0	0	4	2	0	0	1	2	1	0	0
sp|Q4G0N7|F229B_HUMAN;tr|K7ELI0|K7ELI0_HUMAN	sp|Q4G0N7|F229B_HUMAN	1	1333200	1	1	1	1	1	1	1	1	1	1333200	1	1	1	6;2	3;1	3;1	sp|Q4G0N7|F229B_HUMAN Protein FAM229B OS=Homo sapiens GN=FAM229B PE=3 SV=1	2	6	3	3	1	2	2	1	2	3	6	3	1	2	0	1	0	0	1	1	3	1	0	0	0	1	0	0	1
sp|Q15459|SF3A1_HUMAN;tr|H7C1L2|H7C1L2_HUMAN	sp|Q15459|SF3A1_HUMAN	1	1.00017	1	1	1	1	1169300	1	1	1	1	1169500	1	1	1	4;1	4;1	4;1	sp|Q15459|SF3A1_HUMAN Splicing factor 3A subunit 1 OS=Homo sapiens GN=SF3A1 PE=1 SV=1	2	4	4	4	1	3	2	1	0	1	2	1	0	0	1	3	2	1	0	1	2	1	0	0	1	3	2	1	0
sp|Q9H3K6|BOLA2_HUMAN;tr|H3BV85|H3BV85_HUMAN;tr|H3BTW0|H3BTW0_HUMAN;tr|A0A0B4J295|A0A0B4J295_HUMAN;tr|H3BVE0|H3BVE0_HUMAN	sp|Q9H3K6|BOLA2_HUMAN;tr|H3BV85|H3BV85_HUMAN;tr|H3BTW0|H3BTW0_HUMAN;tr|A0A0B4J295|A0A0B4J295_HUMAN;tr|H3BVE0|H3BVE0_HUMAN	1	0.5946	1	1	1	1	1966700	1	1	1	1	1169400	1	1	1	2;1;1;1;1	2;1;1;1;1	2;1;1;1;1	sp|Q9H3K6|BOLA2_HUMAN BolA-like protein 2 OS=Homo sapiens GN=BOLA2 PE=1 SV=1;tr|H3BV85|H3BV85_HUMAN BolA-like protein 2 (Fragment) OS=Homo sapiens GN=BOLA2B PE=1 SV=1;tr|H3BTW0|H3BTW0_HUMAN Uncharacterized protein (Fragment) OS=Homo sapiens PE=3 SV=1;tr|A0	5	2	2	2	0	2	0	0	0	0	2	1	0	0	0	2	0	0	0	0	2	1	0	0	0	2	0	0	0
sp|Q8NHQ9|DDX55_HUMAN;tr|F5H5U2|F5H5U2_HUMAN;tr|E7EX41|E7EX41_HUMAN	sp|Q8NHQ9|DDX55_HUMAN;tr|F5H5U2|F5H5U2_HUMAN;tr|E7EX41|E7EX41_HUMAN	1	1.15712	1	1	1	1	988140	1	1	1	1	1143400	1	1	1	2;2;1	2;2;1	2;2;1	sp|Q8NHQ9|DDX55_HUMAN ATP-dependent RNA helicase DDX55 OS=Homo sapiens GN=DDX55 PE=1 SV=3;tr|F5H5U2|F5H5U2_HUMAN ATP-dependent RNA helicase DDX55 OS=Homo sapiens GN=DDX55 PE=1 SV=1;tr|E7EX41|E7EX41_HUMAN ATP-dependent RNA helicase DDX55 OS=Homo sapiens GN=	3	2	2	2	0	2	1	0	0	1	2	0	0	0	0	2	1	0	0	1	2	0	0	0	0	2	1	0	0
sp|Q5SWX8|ODR4_HUMAN	sp|Q5SWX8|ODR4_HUMAN	1	1.54693	1	1	1	1	731770	1	1	1	1	1132000	1	1	1	2	2	2	sp|Q5SWX8|ODR4_HUMAN Protein odr-4 homolog OS=Homo sapiens GN=ODR4 PE=1 SV=1	1	2	2	2	0	2	0	0	0	0	2	0	0	0	0	2	0	0	0	0	2	0	0	0	0	2	0	0	0
sp|Q9NYL9|TMOD3_HUMAN;tr|H0YKU1|H0YKU1_HUMAN;tr|H0YNJ8|H0YNJ8_HUMAN	sp|Q9NYL9|TMOD3_HUMAN;tr|H0YKU1|H0YKU1_HUMAN;tr|H0YNJ8|H0YNJ8_HUMAN	1	1126500	1	1	1	1	1	1	1	1	1	1126500	1	1	1	3;2;2	3;2;2	3;2;2	sp|Q9NYL9|TMOD3_HUMAN Tropomodulin-3 OS=Homo sapiens GN=TMOD3 PE=1 SV=1;tr|H0YKU1|H0YKU1_HUMAN Tropomodulin-3 (Fragment) OS=Homo sapiens GN=TMOD3 PE=1 SV=1;tr|H0YNJ8|H0YNJ8_HUMAN Tropomodulin-3 OS=Homo sapiens GN=TMOD3 PE=1 SV=1	3	3	3	3	0	0	0	0	0	1	2	0	0	0	0	0	0	0	0	1	2	0	0	0	0	0	0	0	0
sp|Q14739|LBR_HUMAN;tr|C9JXK0|C9JXK0_HUMAN	sp|Q14739|LBR_HUMAN;tr|C9JXK0|C9JXK0_HUMAN	1	1106300	1	1	1	1	1	1	1	1	1	1106300	1	1	1	3;2	3;2	3;2	sp|Q14739|LBR_HUMAN Lamin-B receptor OS=Homo sapiens GN=LBR PE=1 SV=2;tr|C9JXK0|C9JXK0_HUMAN Lamin-B receptor (Fragment) OS=Homo sapiens GN=LBR PE=1 SV=1	2	3	3	3	1	1	0	0	0	1	2	0	0	0	1	1	0	0	0	1	2	0	0	0	1	1	0	0	0
sp|Q7Z353|HDX_HUMAN	sp|Q7Z353|HDX_HUMAN	1	1072400	1	1	1	1	1	1	1	1	1	1072400	1	1	1	2	2	2	sp|Q7Z353|HDX_HUMAN Highly divergent homeobox OS=Homo sapiens GN=HDX PE=1 SV=1	1	2	2	2	0	1	0	0	0	0	2	0	0	0	0	1	0	0	0	0	2	0	0	0	0	1	0	0	0
tr|F8W1R7|F8W1R7_HUMAN;sp|P60660|MYL6_HUMAN;tr|J3KND3|J3KND3_HUMAN;tr|G8JLA2|G8JLA2_HUMAN;tr|G3V1V0|G3V1V0_HUMAN;tr|B7Z6Z4|B7Z6Z4_HUMAN;tr|G3V1Y7|G3V1Y7_HUMAN;tr|F8VPF3|F8VPF3_HUMAN;tr|F8W1I5|F8W1I5_HUMAN;sp|P14649|MYL6B_HUMAN	tr|F8W1R7|F8W1R7_HUMAN;sp|P60660|MYL6_HUMAN;tr|J3KND3|J3KND3_HUMAN;tr|G8JLA2|G8JLA2_HUMAN;tr|G3V1V0|G3V1V0_HUMAN;tr|B7Z6Z4|B7Z6Z4_HUMAN;tr|G3V1Y7|G3V1Y7_HUMAN;tr|F8VPF3|F8VPF3_HUMAN;tr|F8W1I5|F8W1I5_HUMAN;sp|P14649|MYL6B_HUMAN	1	1028600	1	1	1	1	1	1	1	1	1	1028600	1	1	1	2;2;2;2;2;2;1;1;1;1	2;2;2;2;2;2;1;1;1;1	2;2;2;2;2;2;1;1;1;1	tr|F8W1R7|F8W1R7_HUMAN Myosin light polypeptide 6 OS=Homo sapiens GN=MYL6 PE=1 SV=1;sp|P60660|MYL6_HUMAN Myosin light polypeptide 6 OS=Homo sapiens GN=MYL6 PE=1 SV=2;tr|J3KND3|J3KND3_HUMAN Myosin light polypeptide 6 OS=Homo sapiens GN=MYL6 PE=1 SV=1;tr|G8J	10	2	2	2	1	0	0	0	0	0	2	0	0	0	1	0	0	0	0	0	2	0	0	0	1	0	0	0	0
tr|E9PDF6|E9PDF6_HUMAN;sp|O43795|MYO1B_HUMAN;tr|C9JYW1|C9JYW1_HUMAN;tr|E7EQD9|E7EQD9_HUMAN;tr|H7C2Y7|H7C2Y7_HUMAN;sp|Q9UBC5|MYO1A_HUMAN	tr|E9PDF6|E9PDF6_HUMAN;sp|O43795|MYO1B_HUMAN	1	997200	1	1	1	1	1	1	1	1	1	997200	1	1	1	3;3;1;1;1;1	3;3;1;1;1;1	3;3;1;1;1;1	tr|E9PDF6|E9PDF6_HUMAN Unconventional myosin-Ib OS=Homo sapiens GN=MYO1B PE=1 SV=1;sp|O43795|MYO1B_HUMAN Unconventional myosin-Ib OS=Homo sapiens GN=MYO1B PE=1 SV=3	6	3	3	3	1	1	0	0	0	1	2	1	0	1	1	1	0	0	0	1	2	1	0	1	1	1	0	0	0
tr|G3XAG1|G3XAG1_HUMAN;sp|Q96ME7|ZN512_HUMAN	tr|G3XAG1|G3XAG1_HUMAN;sp|Q96ME7|ZN512_HUMAN	1	0.448461	9.78282e-07	1	1	1	2219300	1022200	1	1	1	995270	1	1	1	5;5	5;5	5;5	tr|G3XAG1|G3XAG1_HUMAN Zinc finger protein 512 OS=Homo sapiens GN=ZNF512 PE=1 SV=1;sp|Q96ME7|ZN512_HUMAN Zinc finger protein 512 OS=Homo sapiens GN=ZNF512 PE=1 SV=2	2	5	5	5	2	3	3	0	0	1	2	1	0	0	2	3	3	0	0	1	2	1	0	0	2	3	3	0	0
sp|Q8IUF8|MINA_HUMAN;tr|H0Y9L8|H0Y9L8_HUMAN;tr|D6RCB6|D6RCB6_HUMAN	sp|Q8IUF8|MINA_HUMAN	1	946300	1	1	1	1	1	1	1	1	1	946300	1	1	1	4;1;1	4;1;1	4;1;1	sp|Q8IUF8|MINA_HUMAN Bifunctional lysine-specific demethylase and histidyl-hydroxylase MINA OS=Homo sapiens GN=MINA PE=1 SV=1	3	4	4	4	0	2	1	0	0	3	2	0	0	0	0	2	1	0	0	3	2	0	0	0	0	2	1	0	0
sp|Q9P219|DAPLE_HUMAN	sp|Q9P219|DAPLE_HUMAN	1	938040	1	1	1	1	1	1	1	1	1	938040	1	1	1	2	2	2	sp|Q9P219|DAPLE_HUMAN Protein Daple OS=Homo sapiens GN=CCDC88C PE=1 SV=3	1	2	2	2	0	0	0	0	0	0	2	0	0	0	0	0	0	0	0	0	2	0	0	0	0	0	0	0	0
sp|Q9Y4C8|RBM19_HUMAN;tr|H0YIL2|H0YIL2_HUMAN	sp|Q9Y4C8|RBM19_HUMAN	1	908870	1	1	1	1	1	1	1	1	1	908870	1	1	1	3;1	3;1	3;1	sp|Q9Y4C8|RBM19_HUMAN Probable RNA-binding protein 19 OS=Homo sapiens GN=RBM19 PE=1 SV=3	2	3	3	3	2	1	1	0	0	1	3	1	0	0	2	1	1	0	0	1	3	1	0	0	2	1	1	0	0
sp|O75818|RPP40_HUMAN;tr|B7ZM87|B7ZM87_HUMAN;tr|F8WC38|F8WC38_HUMAN;tr|X6RLL4|X6RLL4_HUMAN	sp|O75818|RPP40_HUMAN;tr|B7ZM87|B7ZM87_HUMAN;tr|F8WC38|F8WC38_HUMAN;tr|X6RLL4|X6RLL4_HUMAN	1	906960	1	1	1	1	1	1	1	1	1	906960	1	1	1	3;3;2;2	3;3;2;2	3;3;2;2	sp|O75818|RPP40_HUMAN Ribonuclease P protein subunit p40 OS=Homo sapiens GN=RPP40 PE=1 SV=3;tr|B7ZM87|B7ZM87_HUMAN SLIT-ROBO Rho GTPase-activating protein 2 OS=Homo sapiens GN=SRGAP2 PE=1 SV=1;tr|F8WC38|F8WC38_HUMAN Ribonuclease P protein subunit p40 OS=Ho	4	3	3	3	0	1	1	0	0	0	2	0	0	1	0	1	1	0	0	0	2	0	0	1	0	1	1	0	0
sp|P01040|CYTA_HUMAN;tr|C9J0E4|C9J0E4_HUMAN	sp|P01040|CYTA_HUMAN;tr|C9J0E4|C9J0E4_HUMAN	1	900770	1	1	1	1	1	1	1	1	1	900770	1	1	1	2;1	2;1	2;1	sp|P01040|CYTA_HUMAN Cystatin-A OS=Homo sapiens GN=CSTA PE=1 SV=1;tr|C9J0E4|C9J0E4_HUMAN Cystatin-A OS=Homo sapiens GN=CSTA PE=1 SV=1	2	2	2	2	0	1	1	0	0	0	2	0	0	0	0	1	1	0	0	0	2	0	0	0	0	1	1	0	0
sp|P19105|ML12A_HUMAN;sp|O14950|ML12B_HUMAN;tr|J3QRS3|J3QRS3_HUMAN	sp|P19105|ML12A_HUMAN;sp|O14950|ML12B_HUMAN;tr|J3QRS3|J3QRS3_HUMAN	1	868260	1	1	1	1	1	1	1	1	1	868260	1	1	1	2;2;2	2;2;2	2;2;2	sp|P19105|ML12A_HUMAN Myosin regulatory light chain 12A OS=Homo sapiens GN=MYL12A PE=1 SV=2;sp|O14950|ML12B_HUMAN Myosin regulatory light chain 12B OS=Homo sapiens GN=MYL12B PE=1 SV=2;tr|J3QRS3|J3QRS3_HUMAN Myosin regulatory light chain 12A OS=Homo sapiens	3	2	2	2	0	1	0	0	0	1	2	0	0	0	0	1	0	0	0	1	2	0	0	0	0	1	0	0	0
sp|Q9NPI1|BRD7_HUMAN	sp|Q9NPI1|BRD7_HUMAN	1	841740	1	1	1	1	1	1	1	1	1	841740	1	1	1	2	2	2	sp|Q9NPI1|BRD7_HUMAN Bromodomain-containing protein 7 OS=Homo sapiens GN=BRD7 PE=1 SV=1	1	2	2	2	0	1	0	0	0	0	2	0	0	0	0	1	0	0	0	0	2	0	0	0	0	1	0	0	0
sp|P62140|PP1B_HUMAN;tr|C9J9S3|C9J9S3_HUMAN;tr|C9JP48|C9JP48_HUMAN	sp|P62140|PP1B_HUMAN;tr|C9J9S3|C9J9S3_HUMAN;tr|C9JP48|C9JP48_HUMAN	1	807390	1	1	1	1	1	1	1	1	1	807390	1	1	1	7;4;4	2;1;1	2;1;1	sp|P62140|PP1B_HUMAN Serine/threonine-protein phosphatase PP1-beta catalytic subunit OS=Homo sapiens GN=PPP1CB PE=1 SV=3;tr|C9J9S3|C9J9S3_HUMAN Serine/threonine-protein phosphatase (Fragment) OS=Homo sapiens GN=PPP1CB PE=1 SV=1;tr|C9JP48|C9JP48_HUMAN Serin	3	7	2	2	3	3	3	1	3	3	5	2	0	4	1	1	0	0	1	0	2	0	0	1	1	1	0	0	1
sp|O43251|RFOX2_HUMAN;tr|S4R3K7|S4R3K7_HUMAN;tr|A0A0G2JRA5|A0A0G2JRA5_HUMAN;tr|B0QYV1|B0QYV1_HUMAN;tr|A0A0G2JRD1|A0A0G2JRD1_HUMAN;tr|S4R469|S4R469_HUMAN;tr|F8VR27|F8VR27_HUMAN;tr|F8VZY7|F8VZY7_HUMAN;tr|I3L1D4|I3L1D4_HUMAN;tr|B0QYY4|B0QYY4_HUMAN;tr|A0A087X2B1|A0A087X2B1_HUMAN;tr|B0QYY7|B0QYY7_HUMAN;sp|Q9NWB1|RFOX1_HUMAN;tr|J3KNW3|J3KNW3_HUMAN;tr|B7Z1U7|B7Z1U7_HUMAN;tr|F8VZG9|F8VZG9_HUMAN;tr|A0A0G2…	sp|O43251|RFOX2_HUMAN;tr|S4R3K7|S4R3K7_HUMAN;tr|A0A0G2JRA5|A0A0G2JRA5_HUMAN;tr|B0QYV1|B0QYV1_HUMAN;tr|A0A0G2JRD1|A0A0G2JRD1_HUMAN;tr|S4R469|S4R469_HUMAN;tr|F8VR27|F8VR27_HUMAN;tr|F8VZY7|F8VZY7_HUMAN;tr|I3L1D4|I3L1D4_HUMAN;tr|B0QYY4|B0QYY4_HUMAN;tr|A0A087X2B1|A0A087X2B1_HUMAN;tr|B0QYY7|B0QYY7_HUMAN;sp|Q9NWB1|RFOX1_HUMAN;tr|J3KNW3|J3KNW3_HUMAN;tr|B7Z1U7|B7Z1U7_HUMAN;tr|F8VZG9|F8VZG9_HUMAN;tr|A0A0G2…	1	800720	1.40744e-06	1	1	1	1	710510	1	1	1	800720	1	1	1	2;2;2;2;2;1;1;1;1;1;1;1;1;1;1;1;1	2;2;2;2;2;1;1;1;1;1;1;1;1;1;1;1;1	2;2;2;2;2;1;1;1;1;1;1;1;1;1;1;1;1	sp|O43251|RFOX2_HUMAN RNA binding protein fox-1 homolog 2 OS=Homo sapiens GN=RBFOX2 PE=1 SV=3;tr|S4R3K7|S4R3K7_HUMAN RNA-binding protein fox-1 homolog 2 (Fragment) OS=Homo sapiens GN=RBFOX2 PE=1 SV=1;tr|A0A0G2JRA5|A0A0G2JRA5_HUMAN RNA-binding protein fox-1	17	2	2	2	0	0	2	0	0	1	2	0	0	0	0	0	2	0	0	1	2	0	0	0	0	0	2	0	0
sp|Q08J23|NSUN2_HUMAN	sp|Q08J23|NSUN2_HUMAN	1	746220	1	1	1	1	1	1	1	1	1	746220	1	1	1	3	3	3	sp|Q08J23|NSUN2_HUMAN tRNA (cytosine(34)-C(5))-methyltransferase OS=Homo sapiens GN=NSUN2 PE=1 SV=2	1	3	3	3	1	1	1	0	0	1	2	0	0	0	1	1	1	0	0	1	2	0	0	0	1	1	1	0	0
sp|Q9BRS2|RIOK1_HUMAN	sp|Q9BRS2|RIOK1_HUMAN	1	688190	1	1	1	1	1	1	1	1	1	688190	1	1	1	4	4	4	sp|Q9BRS2|RIOK1_HUMAN Serine/threonine-protein kinase RIO1 OS=Homo sapiens GN=RIOK1 PE=1 SV=2	1	4	4	4	0	0	0	0	0	1	2	1	0	1	0	0	0	0	0	1	2	1	0	1	0	0	0	0	0
tr|A0A087WT34|A0A087WT34_HUMAN;tr|A0A087X1H1|A0A087X1H1_HUMAN;tr|A0A0A0MTS6|A0A0A0MTS6_HUMAN;sp|O95983|MBD3_HUMAN;tr|Q49AT5|Q49AT5_HUMAN	tr|A0A087WT34|A0A087WT34_HUMAN;tr|A0A087X1H1|A0A087X1H1_HUMAN;tr|A0A0A0MTS6|A0A0A0MTS6_HUMAN;sp|O95983|MBD3_HUMAN;tr|Q49AT5|Q49AT5_HUMAN	1	656530	1	1	1	1	1	1	1	1	1	656530	1	1	1	1;1;1;1;1	1;1;1;1;1	1;1;1;1;1	tr|A0A087WT34|A0A087WT34_HUMAN Methyl-CpG-binding domain protein 3 (Fragment) OS=Homo sapiens GN=MBD3 PE=1 SV=1;tr|A0A087X1H1|A0A087X1H1_HUMAN Methyl-CpG-binding domain protein 3 (Fragment) OS=Homo sapiens GN=MBD3 PE=1 SV=1;tr|A0A0A0MTS6|A0A0A0MTS6_HUMAN M	5	1	1	1	0	1	1	0	0	0	1	0	0	0	0	1	1	0	0	0	1	0	0	0	0	1	1	0	0
tr|E9PI46|E9PI46_HUMAN;tr|D6RBL0|D6RBL0_HUMAN;tr|F8WE35|F8WE35_HUMAN;sp|O95140|MFN2_HUMAN	tr|E9PI46|E9PI46_HUMAN;tr|D6RBL0|D6RBL0_HUMAN;tr|F8WE35|F8WE35_HUMAN;sp|O95140|MFN2_HUMAN	1	647910	1	1	1	1	1	1	1	1	1	647910	1	1	1	1;1;1;1	1;1;1;1	1;1;1;1	tr|E9PI46|E9PI46_HUMAN ATP-binding cassette sub-family D member 4 OS=Homo sapiens GN=ABCD4 PE=1 SV=1;tr|D6RBL0|D6RBL0_HUMAN Transmembrane protein 165 OS=Homo sapiens GN=TMEM165 PE=1 SV=1;tr|F8WE35|F8WE35_HUMAN Activating transcription factor 7-interacting	4	1	1	1	0	0	0	1	0	0	1	0	0	0	0	0	0	1	0	0	1	0	0	0	0	0	0	1	0
tr|C9JPJ8|C9JPJ8_HUMAN;sp|Q8IYP9|ZDH23_HUMAN;tr|E9PAP7|E9PAP7_HUMAN;tr|B3KXV3|B3KXV3_HUMAN	tr|C9JPJ8|C9JPJ8_HUMAN;sp|Q8IYP9|ZDH23_HUMAN;tr|E9PAP7|E9PAP7_HUMAN;tr|B3KXV3|B3KXV3_HUMAN	1	635830	1	1	1	1	1	1	1	1	1	635830	1	1	1	1;1;1;1	1;1;1;1	1;1;1;1	tr|C9JPJ8|C9JPJ8_HUMAN Palmitoyltransferase ZDHHC23 (Fragment) OS=Homo sapiens GN=ZDHHC23 PE=4 SV=1;sp|Q8IYP9|ZDH23_HUMAN Palmitoyltransferase ZDHHC23 OS=Homo sapiens GN=ZDHHC23 PE=1 SV=3;tr|E9PAP7|E9PAP7_HUMAN Palmitoyltransferase OS=Homo sapiens GN=ZDHHC	4	1	1	1	0	0	0	0	0	0	1	0	0	0	0	0	0	0	0	0	1	0	0	0	0	0	0	0	0
tr|H7C3A1|H7C3A1_HUMAN;sp|Q9BXP5|SRRT_HUMAN;tr|H7C1K0|H7C1K0_HUMAN;tr|A0A0A0MSP6|A0A0A0MSP6_HUMAN	tr|H7C3A1|H7C3A1_HUMAN;sp|Q9BXP5|SRRT_HUMAN	1	0.83901	1	1	1	1	746320	1	1	1	1	626170	1	1	1	4;4;1;1	4;4;1;1	4;4;1;1	tr|H7C3A1|H7C3A1_HUMAN Serrate RNA effector molecule homolog (Fragment) OS=Homo sapiens GN=SRRT PE=1 SV=1;sp|Q9BXP5|SRRT_HUMAN Serrate RNA effector molecule homolog OS=Homo sapiens GN=SRRT PE=1 SV=1	4	4	4	4	1	2	2	0	0	1	2	1	0	1	1	2	2	0	0	1	2	1	0	1	1	2	2	0	0
sp|Q13185|CBX3_HUMAN;tr|C9JMM0|C9JMM0_HUMAN;tr|S4R2Y4|S4R2Y4_HUMAN;tr|G3V481|G3V481_HUMAN;tr|K7ELA4|K7ELA4_HUMAN;tr|B5MD17|B5MD17_HUMAN;tr|J3KS05|J3KS05_HUMAN;sp|P83916|CBX1_HUMAN	sp|Q13185|CBX3_HUMAN;tr|C9JMM0|C9JMM0_HUMAN;tr|S4R2Y4|S4R2Y4_HUMAN;tr|G3V481|G3V481_HUMAN	1	625910	1	1	1	1	1	1	1	1	1	625910	1	1	1	4;2;2;2;1;1;1;1	4;2;2;2;1;1;1;1	4;2;2;2;1;1;1;1	sp|Q13185|CBX3_HUMAN Chromobox protein homolog 3 OS=Homo sapiens GN=CBX3 PE=1 SV=4;tr|C9JMM0|C9JMM0_HUMAN Chromobox protein homolog 3 (Fragment) OS=Homo sapiens GN=CBX3 PE=1 SV=1;tr|S4R2Y4|S4R2Y4_HUMAN Chromobox protein homolog 3 (Fragment) OS=Homo sapiens	8	4	4	4	1	1	0	0	1	1	2	0	0	2	1	1	0	0	1	1	2	0	0	2	1	1	0	0	1
sp|Q9UN81|LORF1_HUMAN	sp|Q9UN81|LORF1_HUMAN	1	617930	1	1	1	1	1	1	1	1	1	617930	1	1	1	2	2	2	sp|Q9UN81|LORF1_HUMAN LINE-1 retrotransposable element ORF1 protein OS=Homo sapiens GN=L1RE1 PE=1 SV=1	1	2	2	2	1	1	1	0	0	1	2	1	0	1	1	1	1	0	0	1	2	1	0	1	1	1	1	0	0
sp|P46821|MAP1B_HUMAN	sp|P46821|MAP1B_HUMAN	1	579620	1	1	1	1	1	1	1	1	1	579620	1	1	1	1	1	1	sp|P46821|MAP1B_HUMAN Microtubule-associated protein 1B OS=Homo sapiens GN=MAP1B PE=1 SV=2	1	1	1	1	0	0	1	0	0	0	1	0	0	0	0	0	1	0	0	0	1	0	0	0	0	0	1	0	0
sp|Q13347|EIF3I_HUMAN;tr|Q5TFK1|Q5TFK1_HUMAN	sp|Q13347|EIF3I_HUMAN	1	551690	1	1	1	1	1	1	1	1	1	551690	1	1	1	3;1	3;1	3;1	sp|Q13347|EIF3I_HUMAN Eukaryotic translation initiation factor 3 subunit I OS=Homo sapiens GN=EIF3I PE=1 SV=1	2	3	3	3	0	1	0	0	1	0	1	1	0	0	0	1	0	0	1	0	1	1	0	0	0	1	0	0	1
sp|Q9BQE3|TBA1C_HUMAN;tr|F5H5D3|F5H5D3_HUMAN;sp|Q9NY65|TBA8_HUMAN;tr|C9J2C0|C9J2C0_HUMAN	sp|Q9BQE3|TBA1C_HUMAN;tr|F5H5D3|F5H5D3_HUMAN;sp|Q9NY65|TBA8_HUMAN;tr|C9J2C0|C9J2C0_HUMAN	1	491380	1	1	1	1	1	1	1	1	1	491380	1	1	1	17;17;11;11	1;1;1;1	0;0;0;0	sp|Q9BQE3|TBA1C_HUMAN Tubulin alpha-1C chain OS=Homo sapiens GN=TUBA1C PE=1 SV=1;tr|F5H5D3|F5H5D3_HUMAN Tubulin alpha-1C chain OS=Homo sapiens GN=TUBA1C PE=1 SV=1;sp|Q9NY65|TBA8_HUMAN Tubulin alpha-8 chain OS=Homo sapiens GN=TUBA8 PE=1 SV=1;tr|C9J2C0|C9J2C	4	17	1	0	10	13	11	3	7	8	11	10	5	11	0	1	1	0	0	0	1	0	0	0	0	0	0	0	0
sp|Q96BK5|PINX1_HUMAN;tr|E5RJG9|E5RJG9_HUMAN;tr|E5RGR1|E5RGR1_HUMAN;tr|A0A0A6YYK5|A0A0A6YYK5_HUMAN	sp|Q96BK5|PINX1_HUMAN;tr|E5RJG9|E5RJG9_HUMAN;tr|E5RGR1|E5RGR1_HUMAN;tr|A0A0A6YYK5|A0A0A6YYK5_HUMAN	1	472650	1	1	1	1	1	1	1	1	1	472650	1	1	1	2;1;1;1	2;1;1;1	2;1;1;1	sp|Q96BK5|PINX1_HUMAN PIN2/TERF1-interacting telomerase inhibitor 1 OS=Homo sapiens GN=PINX1 PE=1 SV=2;tr|E5RJG9|E5RJG9_HUMAN PIN2/TERF1-interacting telomerase inhibitor 1 OS=Homo sapiens GN=PINX1 PE=4 SV=1;tr|E5RGR1|E5RGR1_HUMAN PIN2/TERF1-interacting tel	4	2	2	2	1	1	1	0	1	1	1	0	0	0	1	1	1	0	1	1	1	0	0	0	1	1	1	0	1
sp|Q9ULR0|ISY1_HUMAN;tr|D6RC18|D6RC18_HUMAN;tr|A8MVI5|A8MVI5_HUMAN	sp|Q9ULR0|ISY1_HUMAN;tr|D6RC18|D6RC18_HUMAN;tr|A8MVI5|A8MVI5_HUMAN	1	461140	1	1	1	1	1	1	1	1	1	461140	1	1	1	2;1;1	2;1;1	2;1;1	sp|Q9ULR0|ISY1_HUMAN Pre-mRNA-splicing factor ISY1 homolog OS=Homo sapiens GN=ISY1 PE=1 SV=3;tr|D6RC18|D6RC18_HUMAN Pre-mRNA-splicing factor ISY1 homolog OS=Homo sapiens GN=ISY1 PE=1 SV=1;tr|A8MVI5|A8MVI5_HUMAN Pre-mRNA-splicing factor ISY1 homolog OS=Homo	3	2	2	2	0	1	1	0	0	0	1	0	0	0	0	1	1	0	0	0	1	0	0	0	0	1	1	0	0
sp|Q9NVN8|GNL3L_HUMAN	sp|Q9NVN8|GNL3L_HUMAN	1	452530	1	1	1	1	1	1	1	1	1	452530	1	1	1	2	2	2	sp|Q9NVN8|GNL3L_HUMAN Guanine nucleotide-binding protein-like 3-like protein OS=Homo sapiens GN=GNL3L PE=1 SV=1	1	2	2	2	0	1	1	1	0	0	1	1	0	0	0	1	1	1	0	0	1	1	0	0	0	1	1	1	0
tr|E9PPG9|E9PPG9_HUMAN;sp|P78406|RAE1L_HUMAN;tr|E9PQ57|E9PQ57_HUMAN;tr|B0QZ36|B0QZ36_HUMAN	tr|E9PPG9|E9PPG9_HUMAN;sp|P78406|RAE1L_HUMAN;tr|E9PQ57|E9PQ57_HUMAN;tr|B0QZ36|B0QZ36_HUMAN	1	405360	1	1	1	1	1	1	1	1	1	405360	1	1	1	2;2;2;1	2;2;2;1	2;2;2;1	tr|E9PPG9|E9PPG9_HUMAN mRNA export factor OS=Homo sapiens GN=RAE1 PE=1 SV=1;sp|P78406|RAE1L_HUMAN mRNA export factor OS=Homo sapiens GN=RAE1 PE=1 SV=1;tr|E9PQ57|E9PQ57_HUMAN mRNA export factor OS=Homo sapiens GN=RAE1 PE=1 SV=1;tr|B0QZ36|B0QZ36_HUMAN mRNA e	4	2	2	2	0	0	1	0	0	0	1	0	0	0	0	0	1	0	0	0	1	0	0	0	0	0	1	0	0
tr|A0A0A0MR39|A0A0A0MR39_HUMAN;sp|Q9P2K5|MYEF2_HUMAN;tr|A0A0A0MQW0|A0A0A0MQW0_HUMAN;tr|A0A087WWC8|A0A087WWC8_HUMAN;tr|A0A087WUT0|A0A087WUT0_HUMAN	tr|A0A0A0MR39|A0A0A0MR39_HUMAN;sp|Q9P2K5|MYEF2_HUMAN;tr|A0A0A0MQW0|A0A0A0MQW0_HUMAN;tr|A0A087WWC8|A0A087WWC8_HUMAN;tr|A0A087WUT0|A0A087WUT0_HUMAN	1	359430	1	1	1	1	1	1	1	1	1	359430	1	1	1	2;2;2;1;1	2;2;2;1;1	2;2;2;1;1	tr|A0A0A0MR39|A0A0A0MR39_HUMAN Myelin expression factor 2 OS=Homo sapiens GN=MYEF2 PE=1 SV=1;sp|Q9P2K5|MYEF2_HUMAN Myelin expression factor 2 OS=Homo sapiens GN=MYEF2 PE=1 SV=3;tr|A0A0A0MQW0|A0A0A0MQW0_HUMAN Myelin expression factor 2 OS=Homo sapiens GN=MY	5	2	2	2	0	0	0	0	0	1	1	0	0	0	0	0	0	0	0	1	1	0	0	0	0	0	0	0	0
tr|E7ENZ3|E7ENZ3_HUMAN;tr|B7ZAR1|B7ZAR1_HUMAN;tr|E9PCA1|E9PCA1_HUMAN;sp|P48643|TCPE_HUMAN	tr|E7ENZ3|E7ENZ3_HUMAN;tr|B7ZAR1|B7ZAR1_HUMAN;tr|E9PCA1|E9PCA1_HUMAN;sp|P48643|TCPE_HUMAN	1	350630	1	1	1	1	1	1	1	1	1	350630	1	1	1	1;1;1;1	1;1;1;1	1;1;1;1	tr|E7ENZ3|E7ENZ3_HUMAN T-complex protein 1 subunit epsilon OS=Homo sapiens GN=CCT5 PE=1 SV=1;tr|B7ZAR1|B7ZAR1_HUMAN T-complex protein 1 subunit epsilon OS=Homo sapiens GN=CCT5 PE=1 SV=1;tr|E9PCA1|E9PCA1_HUMAN T-complex protein 1 subunit epsilon OS=Homo sap	4	1	1	1	0	1	0	0	1	0	1	0	0	0	0	1	0	0	1	0	1	0	0	0	0	1	0	0	1
sp|Q68D10|SPT2_HUMAN	sp|Q68D10|SPT2_HUMAN	1	344420	1	1	1	1	1	1	1	1	1	344420	1	1	1	2	2	2	sp|Q68D10|SPT2_HUMAN Protein SPT2 homolog OS=Homo sapiens GN=SPTY2D1 PE=1 SV=3	1	2	2	2	0	0	0	0	0	0	1	1	0	0	0	0	0	0	0	0	1	1	0	0	0	0	0	0	0
tr|E9PMI6|E9PMI6_HUMAN;tr|J3KN38|J3KN38_HUMAN;sp|P54105|ICLN_HUMAN	tr|E9PMI6|E9PMI6_HUMAN;tr|J3KN38|J3KN38_HUMAN;sp|P54105|ICLN_HUMAN	1	338520	1	1	1	1	1	1	1	1	1	338520	1	1	1	1;1;1	1;1;1	1;1;1	tr|E9PMI6|E9PMI6_HUMAN Methylosome subunit pICln OS=Homo sapiens GN=CLNS1A PE=1 SV=1;tr|J3KN38|J3KN38_HUMAN Methylosome subunit pICln OS=Homo sapiens GN=CLNS1A PE=1 SV=1;sp|P54105|ICLN_HUMAN Methylosome subunit pICln OS=Homo sapiens GN=CLNS1A PE=1 SV=1	3	1	1	1	0	0	0	0	0	0	1	0	0	0	0	0	0	0	0	0	1	0	0	0	0	0	0	0	0
sp|P53621|COPA_HUMAN	sp|P53621|COPA_HUMAN	1	317220	1	1	1	1	1	1	1	1	1	317220	1	1	1	4	4	4	sp|P53621|COPA_HUMAN Coatomer subunit alpha OS=Homo sapiens GN=COPA PE=1 SV=2	1	4	4	4	1	1	0	0	1	1	1	0	0	0	1	1	0	0	1	1	1	0	0	0	1	1	0	0	1
sp|Q5JUX0|SPIN3_HUMAN	sp|Q5JUX0|SPIN3_HUMAN	1	316290	1	1	1	1	1	1	1	1	1	316290	1	1	1	5	1	1	sp|Q5JUX0|SPIN3_HUMAN Spindlin-3 OS=Homo sapiens GN=SPIN3 PE=1 SV=1	1	5	1	1	2	4	3	0	1	2	3	2	1	1	0	1	1	0	0	0	1	0	0	0	0	1	1	0	0
sp|P55008|AIF1_HUMAN	sp|P55008|AIF1_HUMAN	1	315810	1	1	1	1	1	1	1	1	1	315810	1	1	1	1	1	1	sp|P55008|AIF1_HUMAN Allograft inflammatory factor 1 OS=Homo sapiens GN=AIF1 PE=1 SV=1	1	1	1	1	0	1	1	0	0	0	1	0	0	0	0	1	1	0	0	0	1	0	0	0	0	1	1	0	0
tr|C9JYA6|C9JYA6_HUMAN;sp|O75319|DUS11_HUMAN;tr|H7C0E6|H7C0E6_HUMAN	tr|C9JYA6|C9JYA6_HUMAN;sp|O75319|DUS11_HUMAN;tr|H7C0E6|H7C0E6_HUMAN	1	311270	1	1	1	1	1	1	1	1	1	311270	1	1	1	2;2;2	2;2;2	2;2;2	tr|C9JYA6|C9JYA6_HUMAN RNA/RNP complex-1-interacting phosphatase OS=Homo sapiens GN=DUSP11 PE=1 SV=1;sp|O75319|DUS11_HUMAN RNA/RNP complex-1-interacting phosphatase OS=Homo sapiens GN=DUSP11 PE=1 SV=1;tr|H7C0E6|H7C0E6_HUMAN RNA/RNP complex-1-interacting ph	3	2	2	2	0	0	0	0	0	1	1	0	0	0	0	0	0	0	0	1	1	0	0	0	0	0	0	0	0
sp|Q9UBS4|DJB11_HUMAN;tr|H7C2Y5|H7C2Y5_HUMAN	sp|Q9UBS4|DJB11_HUMAN;tr|H7C2Y5|H7C2Y5_HUMAN	1	302060	1	1	1	1	1	1	1	1	1	302060	1	1	1	2;1	2;1	2;1	sp|Q9UBS4|DJB11_HUMAN DnaJ homolog subfamily B member 11 OS=Homo sapiens GN=DNAJB11 PE=1 SV=1;tr|H7C2Y5|H7C2Y5_HUMAN DnaJ homolog subfamily B member 11 (Fragment) OS=Homo sapiens GN=DNAJB11 PE=1 SV=5	2	2	2	2	1	1	0	0	0	1	1	0	0	0	1	1	0	0	0	1	1	0	0	0	1	1	0	0	0
sp|Q07157|ZO1_HUMAN;tr|A0A087X0K9|A0A087X0K9_HUMAN;tr|B4DMI0|B4DMI0_HUMAN;tr|A8K0B5|A8K0B5_HUMAN	sp|Q07157|ZO1_HUMAN;tr|A0A087X0K9|A0A087X0K9_HUMAN;tr|B4DMI0|B4DMI0_HUMAN;tr|A8K0B5|A8K0B5_HUMAN	1	291940	1	1	1	1	1	1	1	1	1	291940	1	1	1	2;2;2;2	2;2;2;2	2;2;2;2	sp|Q07157|ZO1_HUMAN Tight junction protein ZO-1 OS=Homo sapiens GN=TJP1 PE=1 SV=3;tr|A0A087X0K9|A0A087X0K9_HUMAN Tight junction protein ZO-1 OS=Homo sapiens GN=TJP1 PE=1 SV=1;tr|B4DMI0|B4DMI0_HUMAN Protein FAM172A OS=Homo sapiens GN=FAM172A PE=1 SV=1;tr|A8	4	2	2	2	0	0	0	0	0	0	1	1	0	0	0	0	0	0	0	0	1	1	0	0	0	0	0	0	0
sp|Q9P1Y5|CAMP3_HUMAN	sp|Q9P1Y5|CAMP3_HUMAN	1	277660	1	1	1	1	1	1	1	1	1	277660	1	1	1	3	3	3	sp|Q9P1Y5|CAMP3_HUMAN Calmodulin-regulated spectrin-associated protein 3 OS=Homo sapiens GN=CAMSAP3 PE=1 SV=2	1	3	3	3	0	0	0	0	1	1	1	1	0	1	0	0	0	0	1	1	1	1	0	1	0	0	0	0	1
tr|H0Y2N6|H0Y2N6_HUMAN;tr|J3QQI9|J3QQI9_HUMAN;tr|B0QY36|B0QY36_HUMAN;tr|B0QY35|B0QY35_HUMAN;sp|P48730|KC1D_HUMAN;sp|P49674|KC1E_HUMAN;tr|H7BYT1|H7BYT1_HUMAN;tr|B0QY34|B0QY34_HUMAN;tr|H0Y645|H0Y645_HUMAN	tr|H0Y2N6|H0Y2N6_HUMAN;tr|J3QQI9|J3QQI9_HUMAN;tr|B0QY36|B0QY36_HUMAN;tr|B0QY35|B0QY35_HUMAN;sp|P48730|KC1D_HUMAN;sp|P49674|KC1E_HUMAN;tr|H7BYT1|H7BYT1_HUMAN;tr|B0QY34|B0QY34_HUMAN;tr|H0Y645|H0Y645_HUMAN	1	277220	1	1	1	1	1	1	1	1	1	277220	1	1	1	1;1;1;1;1;1;1;1;1	1;1;1;1;1;1;1;1;1	1;1;1;1;1;1;1;1;1	tr|H0Y2N6|H0Y2N6_HUMAN Casein kinase I isoform delta (Fragment) OS=Homo sapiens GN=CSNK1D PE=4 SV=1;tr|J3QQI9|J3QQI9_HUMAN Casein kinase I isoform delta (Fragment) OS=Homo sapiens GN=CSNK1D PE=4 SV=1;tr|B0QY36|B0QY36_HUMAN Casein kinase I isoform epsilon (	9	1	1	1	1	0	1	0	0	0	1	0	0	0	1	0	1	0	0	0	1	0	0	0	1	0	1	0	0
sp|P63104|1433Z_HUMAN;tr|E7EX29|E7EX29_HUMAN;tr|H0YB80|H0YB80_HUMAN;sp|P61981|1433G_HUMAN;sp|Q04917|1433F_HUMAN;dazap1_5;sp|P27348|1433T_HUMAN;tr|B0AZS6|B0AZS6_HUMAN;tr|E5RGE1|E5RGE1_HUMAN;tr|B7Z2E6|B7Z2E6_HUMAN;tr|E7EVZ2|E7EVZ2_HUMAN;tr|E9PD24|E9PD24_HUMAN;tr|E5RIR4|E5RIR4_HUMAN;tr|E7ESK7|E7ESK7_HUMAN;tr|Q4VY20|Q4VY20_HUMAN;tr|E9PG15|E9PG15_HUMAN;tr|A2IDB2|A2IDB2_HUMAN;tr|K7EIT4|K7EIT4_HUMAN;tr|…	sp|P63104|1433Z_HUMAN;tr|E7EX29|E7EX29_HUMAN;tr|H0YB80|H0YB80_HUMAN;sp|P61981|1433G_HUMAN;sp|Q04917|1433F_HUMAN;dazap1_5;sp|P27348|1433T_HUMAN;tr|B0AZS6|B0AZS6_HUMAN;tr|E5RGE1|E5RGE1_HUMAN;tr|B7Z2E6|B7Z2E6_HUMAN;tr|E7EVZ2|E7EVZ2_HUMAN;tr|E9PD24|E9PD24_HUMAN;tr|E5RIR4|E5RIR4_HUMAN;tr|E7ESK7|E7ESK7_HUMAN	1	265650	1	1	1	1	1	1	1	1	1	265650	1	1	1	4;4;2;2;2;2;2;2;2;2;2;2;2;2;1;1;1;1;1	2;2;1;0;0;0;0;1;1;1;1;1;1;1;0;0;0;0;0	2;2;1;0;0;0;0;1;1;1;1;1;1;1;0;0;0;0;0	sp|P63104|1433Z_HUMAN 14-3-3 protein zeta/delta OS=Homo sapiens GN=YWHAZ PE=1 SV=1;tr|E7EX29|E7EX29_HUMAN 14-3-3 protein zeta/delta (Fragment) OS=Homo sapiens GN=YWHAZ PE=1 SV=1;tr|H0YB80|H0YB80_HUMAN 14-3-3 protein zeta/delta (Fragment) OS=Homo sapiens GN	19	4	2	2	2	1	1	0	1	1	3	1	0	2	0	0	0	0	1	0	1	0	0	0	0	0	0	0	1
tr|F5H658|F5H658_HUMAN;sp|Q14562|DHX8_HUMAN	tr|F5H658|F5H658_HUMAN;sp|Q14562|DHX8_HUMAN	1	242200	1	1	1	1	1	1	1	1	1	242200	1	1	1	2;2	1;1	1;1	tr|F5H658|F5H658_HUMAN ATP-dependent RNA helicase DHX8 OS=Homo sapiens GN=DHX8 PE=1 SV=1;sp|Q14562|DHX8_HUMAN ATP-dependent RNA helicase DHX8 OS=Homo sapiens GN=DHX8 PE=1 SV=1	2	2	1	1	1	1	1	0	1	1	2	1	1	1	0	0	0	0	0	0	1	0	0	0	0	0	0	0	0
sp|Q8TD26|CHD6_HUMAN;tr|C9JFU2|C9JFU2_HUMAN;tr|H7C294|H7C294_HUMAN;tr|H0YJG4|H0YJG4_HUMAN;tr|A0A087WU44|A0A087WU44_HUMAN;sp|Q9HCK8|CHD8_HUMAN;sp|Q3L8U1|CHD9_HUMAN;sp|Q9P2D1|CHD7_HUMAN	sp|Q8TD26|CHD6_HUMAN;tr|C9JFU2|C9JFU2_HUMAN;tr|H7C294|H7C294_HUMAN;tr|H0YJG4|H0YJG4_HUMAN;tr|A0A087WU44|A0A087WU44_HUMAN;sp|Q9HCK8|CHD8_HUMAN;sp|Q3L8U1|CHD9_HUMAN;sp|Q9P2D1|CHD7_HUMAN	1	239680	1	1	1	1	1	1	1	1	1	239680	1	1	1	2;1;1;1;1;1;1;1	2;1;1;1;1;1;1;1	2;1;1;1;1;1;1;1	sp|Q8TD26|CHD6_HUMAN Chromodomain-helicase-DNA-binding protein 6 OS=Homo sapiens GN=CHD6 PE=1 SV=4;tr|C9JFU2|C9JFU2_HUMAN Chromodomain-helicase-DNA-binding protein 6 OS=Homo sapiens GN=CHD6 PE=1 SV=2;tr|H7C294|H7C294_HUMAN Chromodomain-helicase-DNA-binding	8	2	2	2	0	0	0	0	0	1	1	0	0	0	0	0	0	0	0	1	1	0	0	0	0	0	0	0	0
sp|P48634|PRC2A_HUMAN	sp|P48634|PRC2A_HUMAN	1	228890	1	1	1	1	1	1	1	1	1	228890	1	1	1	2	2	2	sp|P48634|PRC2A_HUMAN Protein PRRC2A OS=Homo sapiens GN=PRRC2A PE=1 SV=3	1	2	2	2	1	0	0	0	1	1	1	0	0	0	1	0	0	0	1	1	1	0	0	0	1	0	0	0	1
tr|H0YLJ3|H0YLJ3_HUMAN;sp|Q15014|MO4L2_HUMAN;tr|B3KTM8|B3KTM8_HUMAN;sp|Q9UBU8|MO4L1_HUMAN;tr|A0A0A0MT59|A0A0A0MT59_HUMAN	tr|H0YLJ3|H0YLJ3_HUMAN;sp|Q15014|MO4L2_HUMAN;tr|B3KTM8|B3KTM8_HUMAN;sp|Q9UBU8|MO4L1_HUMAN;tr|A0A0A0MT59|A0A0A0MT59_HUMAN	1	210000	1	1	1	1	1	1	1	1	1	210000	1	1	1	1;1;1;1;1	1;1;1;1;1	1;1;1;1;1	tr|H0YLJ3|H0YLJ3_HUMAN Mortality factor 4-like protein 1 OS=Homo sapiens GN=MORF4L1 PE=1 SV=1;sp|Q15014|MO4L2_HUMAN Mortality factor 4-like protein 2 OS=Homo sapiens GN=MORF4L2 PE=1 SV=1;tr|B3KTM8|B3KTM8_HUMAN Mortality factor 4-like protein 1 OS=Homo sapi	5	1	1	1	0	0	0	0	0	0	1	0	0	0	0	0	0	0	0	0	1	0	0	0	0	0	0	0	0
sp|P06702|S10A9_HUMAN	sp|P06702|S10A9_HUMAN	1	1	1	1	6.13798e-08	1	1	1	1	16292000	1	1	1	1	1	4	4	4	sp|P06702|S10A9_HUMAN Protein S100-A9 OS=Homo sapiens GN=S100A9 PE=1 SV=1	1	4	4	4	0	0	0	0	4	0	1	0	1	0	0	0	0	0	4	0	1	0	1	0	0	0	0	0	4
sp|Q9NZT1|CALL5_HUMAN	sp|Q9NZT1|CALL5_HUMAN	1	1	1	1	1.38875e-07	1	1	1	1	7200700	1	1	1	1	1	4	4	4	sp|Q9NZT1|CALL5_HUMAN Calmodulin-like protein 5 OS=Homo sapiens GN=CALML5 PE=1 SV=2	1	4	4	4	0	0	0	0	4	0	0	0	0	0	0	0	0	0	4	0	0	0	0	0	0	0	0	0	4
sp|P05109|S10A8_HUMAN	sp|P05109|S10A8_HUMAN	1	1	1	1	1.61426e-07	1	1	1	1	6194800	1	1	1	1	1	1	1	1	sp|P05109|S10A8_HUMAN Protein S100-A8 OS=Homo sapiens GN=S100A8 PE=1 SV=1	1	1	1	1	0	0	0	0	1	0	0	0	0	0	0	0	0	0	1	0	0	0	0	0	0	0	0	0	1
sp|P29508|SPB3_HUMAN;tr|Q5K684|Q5K684_HUMAN	sp|P29508|SPB3_HUMAN;tr|Q5K684|Q5K684_HUMAN	1	1	1	1	1.96649e-07	1	1	1	1	5085200	1	1	1	1	1	5;4	5;4	2;1	sp|P29508|SPB3_HUMAN Serpin B3 OS=Homo sapiens GN=SERPINB3 PE=1 SV=2;tr|Q5K684|Q5K684_HUMAN SCCA1/SCCA2 fusion protein OS=Homo sapiens GN=SERPINB3 PE=1 SV=1	2	5	5	2	0	0	0	0	5	0	0	0	0	0	0	0	0	0	5	0	0	0	0	0	0	0	0	0	2
tr|D6R9E3|D6R9E3_HUMAN	tr|D6R9E3|D6R9E3_HUMAN	1	1	1	1	1.98629e-07	1	1	1	1	5034500	1	1	1	1	1	1	1	1	tr|D6R9E3|D6R9E3_HUMAN Meiotic nuclear division protein 1 homolog OS=Homo sapiens GN=MND1 PE=1 SV=1	1	1	1	1	0	0	0	0	1	0	0	0	0	0	0	0	0	0	1	0	0	0	0	0	0	0	0	0	1
sp|P14923|PLAK_HUMAN;tr|C9JTX4|C9JTX4_HUMAN;tr|C9J826|C9J826_HUMAN;tr|C9JK18|C9JK18_HUMAN;tr|C9JKY1|C9JKY1_HUMAN	sp|P14923|PLAK_HUMAN;tr|C9JTX4|C9JTX4_HUMAN;tr|C9J826|C9J826_HUMAN;tr|C9JK18|C9JK18_HUMAN;tr|C9JKY1|C9JKY1_HUMAN	1	1	1	1	2.77731e-07	1	1	1	1	3600600	1	1	1	1	1	3;2;2;2;2	3;2;2;2;2	3;2;2;2;2	sp|P14923|PLAK_HUMAN Junction plakoglobin OS=Homo sapiens GN=JUP PE=1 SV=3;tr|C9JTX4|C9JTX4_HUMAN Junction plakoglobin (Fragment) OS=Homo sapiens GN=JUP PE=1 SV=1;tr|C9J826|C9J826_HUMAN Junction plakoglobin (Fragment) OS=Homo sapiens GN=JUP PE=1 SV=5;tr|C9	5	3	3	3	0	0	0	0	3	0	0	0	0	0	0	0	0	0	3	0	0	0	0	0	0	0	0	0	3
sp|P47929|LEG7_HUMAN	sp|P47929|LEG7_HUMAN	1	1	1	1	4.54773e-07	1	1	1	1	2198900	1	1	1	1	1	1	1	1	sp|P47929|LEG7_HUMAN Galectin-7 OS=Homo sapiens GN=LGALS7 PE=1 SV=2	1	1	1	1	0	0	0	0	1	0	0	0	0	0	0	0	0	0	1	0	0	0	0	0	0	0	0	0	1
sp|P04792|HSPB1_HUMAN;tr|C9J3N8|C9J3N8_HUMAN;tr|F8WE04|F8WE04_HUMAN	sp|P04792|HSPB1_HUMAN;tr|C9J3N8|C9J3N8_HUMAN;tr|F8WE04|F8WE04_HUMAN	1	1	1	1	5.83397e-07	1	1	1	1	1714100	1	1	1	1	1	2;1;1	2;1;1	2;1;1	sp|P04792|HSPB1_HUMAN Heat shock protein beta-1 OS=Homo sapiens GN=HSPB1 PE=1 SV=2;tr|C9J3N8|C9J3N8_HUMAN Heat shock protein beta-1 OS=Homo sapiens GN=HSPB1 PE=1 SV=1;tr|F8WE04|F8WE04_HUMAN Heat shock protein beta-1 OS=Homo sapiens GN=HSPB1 PE=1 SV=1	3	2	2	2	0	0	0	0	2	0	0	0	0	0	0	0	0	0	2	0	0	0	0	0	0	0	0	0	2
tr|A0A075B730|A0A075B730_HUMAN;tr|A0A087X1U6|A0A087X1U6_HUMAN;sp|P58107|EPIPL_HUMAN	tr|A0A075B730|A0A075B730_HUMAN;tr|A0A087X1U6|A0A087X1U6_HUMAN;sp|P58107|EPIPL_HUMAN	1	1	1	1	6.95217e-07	1	1	1	1	1438400	1	1	1	1	1	6;6;6	2;2;2	2;2;2	tr|A0A075B730|A0A075B730_HUMAN Epiplakin OS=Homo sapiens GN=EPPK1 PE=1 SV=2;tr|A0A087X1U6|A0A087X1U6_HUMAN Epiplakin OS=Homo sapiens GN=EPPK1 PE=1 SV=1;sp|P58107|EPIPL_HUMAN Epiplakin OS=Homo sapiens GN=EPPK1 PE=1 SV=2	3	6	2	2	0	1	0	0	4	1	0	2	0	0	0	0	0	0	2	0	0	0	0	0	0	0	0	0	2
sp|Q8WVV4|POF1B_HUMAN	sp|Q8WVV4|POF1B_HUMAN	1	1	1	1	1.08765e-06	1	1	1	1	919410	1	1	1	1	1	2	2	2	sp|Q8WVV4|POF1B_HUMAN Protein POF1B OS=Homo sapiens GN=POF1B PE=1 SV=3	1	2	2	2	0	0	0	0	2	0	0	0	0	0	0	0	0	0	2	0	0	0	0	0	0	0	0	0	2
sp|Q86WX3|AROS_HUMAN;tr|F8WFE7|F8WFE7_HUMAN	sp|Q86WX3|AROS_HUMAN;tr|F8WFE7|F8WFE7_HUMAN	1	1	1.1362e-06	1	1.1885e-06	1	1	880130	1	841400	1	1	1	1	1	2;1	2;1	2;1	sp|Q86WX3|AROS_HUMAN Active regulator of SIRT1 OS=Homo sapiens GN=RPS19BP1 PE=1 SV=1;tr|F8WFE7|F8WFE7_HUMAN Active regulator of SIRT1 OS=Homo sapiens GN=RPS19BP1 PE=1 SV=1	2	2	2	2	0	1	2	0	2	1	0	1	0	1	0	1	2	0	2	1	0	1	0	1	0	1	2	0	2
sp|P31947|1433S_HUMAN	sp|P31947|1433S_HUMAN	1	1	1	1	2.08616e-06	1	1	1	1	479350	1	1	1	1	1	3	1	1	sp|P31947|1433S_HUMAN 14-3-3 protein sigma OS=Homo sapiens GN=SFN PE=1 SV=1	1	3	1	1	2	1	1	0	1	1	2	1	0	2	0	0	0	0	1	0	0	0	0	0	0	0	0	0	1
sp|P68366|TBA4A_HUMAN;tr|C9JEV8|C9JEV8_HUMAN;tr|C9JQ00|C9JQ00_HUMAN;tr|C9JJQ8|C9JJQ8_HUMAN	sp|P68366|TBA4A_HUMAN	1	1	1	1	2.12431e-06	1	1	1	1	470740	1	1	1	1	1	15;4;4;4	1;1;1;1	1;1;1;1	sp|P68366|TBA4A_HUMAN Tubulin alpha-4A chain OS=Homo sapiens GN=TUBA4A PE=1 SV=1	4	15	1	1	7	9	9	0	5	5	8	7	3	8	0	0	0	0	1	0	0	0	0	0	0	0	0	0	1
sp|Q10570|CPSF1_HUMAN	sp|Q10570|CPSF1_HUMAN	1	1	1	1	2.59302e-06	1	1	1	1	385650	1	1	1	1	1	2	2	2	sp|Q10570|CPSF1_HUMAN Cleavage and polyadenylation specificity factor subunit 1 OS=Homo sapiens GN=CPSF1 PE=1 SV=2	1	2	2	2	0	0	0	0	1	1	0	0	0	0	0	0	0	0	1	1	0	0	0	0	0	0	0	0	1
tr|H3BPE7|H3BPE7_HUMAN;sp|P35637|FUS_HUMAN;tr|A0A075B7D9|A0A075B7D9_HUMAN;sp|Q92804|RBP56_HUMAN	tr|H3BPE7|H3BPE7_HUMAN;sp|P35637|FUS_HUMAN;tr|A0A075B7D9|A0A075B7D9_HUMAN;sp|Q92804|RBP56_HUMAN	1	1	1	5.19157e-07	1	1	1	1	1926200	1	1	1	1	1	1	4;4;2;2	4;4;2;2	4;4;2;2	tr|H3BPE7|H3BPE7_HUMAN RNA-binding protein FUS OS=Homo sapiens GN=FUS PE=1 SV=1;sp|P35637|FUS_HUMAN RNA-binding protein FUS OS=Homo sapiens GN=FUS PE=1 SV=1;tr|A0A075B7D9|A0A075B7D9_HUMAN TATA-binding protein-associated factor 2N OS=Homo sapiens GN=TAF15 P	4	4	4	4	1	2	1	2	1	0	1	2	0	1	1	2	1	2	1	0	1	2	0	1	1	2	1	2	1
tr|H0YMZ1|H0YMZ1_HUMAN;tr|H0YN18|H0YN18_HUMAN;sp|P25789|PSA4_HUMAN;tr|H0YL69|H0YL69_HUMAN;tr|H0YLS6|H0YLS6_HUMAN;tr|H0YKT8|H0YKT8_HUMAN;tr|H0YMI6|H0YMI6_HUMAN;tr|H0YMA1|H0YMA1_HUMAN;tr|H0YLC2|H0YLC2_HUMAN	tr|H0YMZ1|H0YMZ1_HUMAN;tr|H0YN18|H0YN18_HUMAN;sp|P25789|PSA4_HUMAN;tr|H0YL69|H0YL69_HUMAN;tr|H0YLS6|H0YLS6_HUMAN;tr|H0YKT8|H0YKT8_HUMAN;tr|H0YMI6|H0YMI6_HUMAN;tr|H0YMA1|H0YMA1_HUMAN;tr|H0YLC2|H0YLC2_HUMAN	1	1	3.27966e-07	1	1	1	1	3049100	1	1	1	1	1	1	1	2;2;2;2;1;1;1;1;1	2;2;2;2;1;1;1;1;1	2;2;2;2;1;1;1;1;1	tr|H0YMZ1|H0YMZ1_HUMAN Proteasome subunit alpha type (Fragment) OS=Homo sapiens GN=PSMA4 PE=1 SV=5;tr|H0YN18|H0YN18_HUMAN Proteasome subunit alpha type-4 OS=Homo sapiens GN=PSMA4 PE=1 SV=1;sp|P25789|PSA4_HUMAN Proteasome subunit alpha type-4 OS=Homo sapien	9	2	2	2	1	1	2	1	0	1	1	1	1	1	1	1	2	1	0	1	1	1	1	1	1	1	2	1	0
sp|Q13637|RAB32_HUMAN	sp|Q13637|RAB32_HUMAN	1	1	4.36929e-07	1	1	1	1	2288700	1	1	1	1	1	1	1	1	1	1	sp|Q13637|RAB32_HUMAN Ras-related protein Rab-32 OS=Homo sapiens GN=RAB32 PE=1 SV=3	1	1	1	1	0	0	1	0	0	0	0	0	0	0	0	0	1	0	0	0	0	0	0	0	0	0	1	0	0
sp|Q8NCM8|DYHC2_HUMAN	sp|Q8NCM8|DYHC2_HUMAN	1	1	4.98579e-07	1	1	1	1	2005700	1	1	1	1	1	1	1	1	1	1	sp|Q8NCM8|DYHC2_HUMAN Cytoplasmic dynein 2 heavy chain 1 OS=Homo sapiens GN=DYNC2H1 PE=1 SV=4	1	1	1	1	1	1	1	0	0	1	1	1	0	1	1	1	1	0	0	1	1	1	0	1	1	1	1	0	0
sp|P62273|RS29_HUMAN	sp|P62273|RS29_HUMAN	1	1	5.82004e-07	1	1	1	1	1718200	1	1	1	1	1	1	1	1	1	1	sp|P62273|RS29_HUMAN 40S ribosomal protein S29 OS=Homo sapiens GN=RPS29 PE=1 SV=2	1	1	1	1	0	0	1	0	0	0	0	0	0	0	0	0	1	0	0	0	0	0	0	0	0	0	1	0	0
sp|Q9H501|ESF1_HUMAN;tr|A0A087WX71|A0A087WX71_HUMAN	sp|Q9H501|ESF1_HUMAN;tr|A0A087WX71|A0A087WX71_HUMAN	1	1	6.69748e-07	1	1	1	1	1493100	1	1	1	1	1	1	1	6;3	6;3	6;3	sp|Q9H501|ESF1_HUMAN ESF1 homolog OS=Homo sapiens GN=ESF1 PE=1 SV=1;tr|A0A087WX71|A0A087WX71_HUMAN ESF1 homolog OS=Homo sapiens GN=ESF1 PE=1 SV=1	2	6	6	6	1	2	3	0	0	3	1	1	0	2	1	2	3	0	0	3	1	1	0	2	1	2	3	0	0
tr|E7EVI1|E7EVI1_HUMAN;tr|E5RFK1|E5RFK1_HUMAN	tr|E7EVI1|E7EVI1_HUMAN	1	1	7.46491e-07	1	1	1	1	1339600	1	1	1	1	1	1	1	13;1	6;1	0;0	tr|E7EVI1|E7EVI1_HUMAN Double-stranded RNA-binding protein Staufen homolog 2 OS=Homo sapiens GN=STAU2 PE=1 SV=1	2	13	6	0	8	7	7	5	5	7	6	5	6	6	3	2	3	0	0	1	1	1	0	1	0	0	0	0	0
tr|E7ESY4|E7ESY4_HUMAN;sp|Q13330|MTA1_HUMAN;tr|H0Y4T7|H0Y4T7_HUMAN;tr|F8VSM3|F8VSM3_HUMAN;tr|F8W9Y9|F8W9Y9_HUMAN;tr|E9PCS8|E9PCS8_HUMAN;tr|E7EQY4|E7EQY4_HUMAN;tr|E7EV10|E7EV10_HUMAN;sp|Q9BTC8|MTA3_HUMAN;tr|H7C3F3|H7C3F3_HUMAN;tr|H0YIT0|H0YIT0_HUMAN;tr|E9PF88|E9PF88_HUMAN	tr|E7ESY4|E7ESY4_HUMAN;sp|Q13330|MTA1_HUMAN;tr|H0Y4T7|H0Y4T7_HUMAN	1	5.98229e-07	8.25423e-07	1	1	1	1671600	1211500	1	1	1	1	1	1	1	8;8;5;3;3;2;2;2;2;1;1;1	7;7;4;2;3;1;1;1;1;1;1;1	7;7;4;2;3;1;1;1;1;1;1;1	tr|E7ESY4|E7ESY4_HUMAN Metastasis-associated protein MTA1 OS=Homo sapiens GN=MTA1 PE=1 SV=1;sp|Q13330|MTA1_HUMAN Metastasis-associated protein MTA1 OS=Homo sapiens GN=MTA1 PE=1 SV=2;tr|H0Y4T7|H0Y4T7_HUMAN Metastasis-associated protein MTA1 (Fragment) OS=Ho	12	8	7	7	2	5	2	1	2	3	3	3	1	2	1	4	2	0	1	2	2	2	0	1	1	4	2	0	1
sp|Q92615|LAR4B_HUMAN;tr|H0Y641|H0Y641_HUMAN;tr|H0Y4V9|H0Y4V9_HUMAN	sp|Q92615|LAR4B_HUMAN	1	1	8.31808e-07	1	1	1	1	1202200	1	1	1	1	1	1	1	5;2;2	5;2;2	5;2;2	sp|Q92615|LAR4B_HUMAN La-related protein 4B OS=Homo sapiens GN=LARP4B PE=1 SV=3	3	5	5	5	1	0	3	0	0	2	1	0	0	0	1	0	3	0	0	2	1	0	0	0	1	0	3	0	0
sp|Q9NQB0|TF7L2_HUMAN	sp|Q9NQB0|TF7L2_HUMAN	1	1	9.86582e-07	1	1	1	1	1013600	1	1	1	1	1	1	1	2	2	2	sp|Q9NQB0|TF7L2_HUMAN Transcription factor 7-like 2 OS=Homo sapiens GN=TCF7L2 PE=1 SV=2	1	2	2	2	1	1	2	0	0	1	1	1	0	0	1	1	2	0	0	1	1	1	0	0	1	1	2	0	0
sp|P49750|YLPM1_HUMAN;tr|F8VU51|F8VU51_HUMAN;tr|H0YIQ2|H0YIQ2_HUMAN	sp|P49750|YLPM1_HUMAN;tr|F8VU51|F8VU51_HUMAN	1	1	1.1817e-06	1	1	1	1	846240	1	1	1	1	1	1	1	3;2;1	3;2;1	3;2;1	sp|P49750|YLPM1_HUMAN YLP motif-containing protein 1 OS=Homo sapiens GN=YLPM1 PE=1 SV=3;tr|F8VU51|F8VU51_HUMAN YLP motif-containing protein 1 OS=Homo sapiens GN=YLPM1 PE=1 SV=1	3	3	3	3	1	0	2	0	0	1	0	2	0	0	1	0	2	0	0	1	0	2	0	0	1	0	2	0	0
sp|P19387|RPB3_HUMAN;tr|H3BRR2|H3BRR2_HUMAN	sp|P19387|RPB3_HUMAN;tr|H3BRR2|H3BRR2_HUMAN	1	1	1.19466e-06	1	1	1	1	837060	1	1	1	1	1	1	1	2;1	2;1	2;1	sp|P19387|RPB3_HUMAN DNA-directed RNA polymerase II subunit RPB3 OS=Homo sapiens GN=POLR2C PE=1 SV=2;tr|H3BRR2|H3BRR2_HUMAN DNA-directed RNA polymerase II subunit RPB3 OS=Homo sapiens GN=POLR2C PE=1 SV=1	2	2	2	2	0	0	1	0	0	0	1	0	0	0	0	0	1	0	0	0	1	0	0	0	0	0	1	0	0
tr|K7EIG7|K7EIG7_HUMAN;tr|J3QRN6|J3QRN6_HUMAN;sp|O94832|MYO1D_HUMAN;tr|J3KRL0|J3KRL0_HUMAN	tr|K7EIG7|K7EIG7_HUMAN;tr|J3QRN6|J3QRN6_HUMAN;sp|O94832|MYO1D_HUMAN;tr|J3KRL0|J3KRL0_HUMAN	1	1	1.20751e-06	1	1	1	1	828150	1	1	1	1	1	1	1	4;4;4;2	4;4;4;2	4;4;4;2	tr|K7EIG7|K7EIG7_HUMAN Unconventional myosin-Id OS=Homo sapiens GN=MYO1D PE=1 SV=1;tr|J3QRN6|J3QRN6_HUMAN Unconventional myosin-Id OS=Homo sapiens GN=MYO1D PE=1 SV=1;sp|O94832|MYO1D_HUMAN Unconventional myosin-Id OS=Homo sapiens GN=MYO1D PE=1 SV=2;tr|J3KRL	4	4	4	4	1	1	2	0	0	0	1	1	0	0	1	1	2	0	0	0	1	1	0	0	1	1	2	0	0
tr|E5RJN7|E5RJN7_HUMAN;tr|A0A0A0MTC4|A0A0A0MTC4_HUMAN;tr|A0A0A0MTD1|A0A0A0MTD1_HUMAN;tr|F8VPI7|F8VPI7_HUMAN;tr|E7EPX0|E7EPX0_HUMAN;tr|A0A0A0MTC6|A0A0A0MTC6_HUMAN;tr|E7EVJ4|E7EVJ4_HUMAN;tr|E9PH62|E9PH62_HUMAN;sp|Q9NUL3|STAU2_HUMAN;tr|A0A0A0MTC5|A0A0A0MTC5_HUMAN;tr|G5EA18|G5EA18_HUMAN;tr|E5RJ67|E5RJ67_HUMAN;tr|H0YBY0|H0YBY0_HUMAN	tr|E5RJN7|E5RJN7_HUMAN;tr|A0A0A0MTC4|A0A0A0MTC4_HUMAN;tr|A0A0A0MTD1|A0A0A0MTD1_HUMAN;tr|F8VPI7|F8VPI7_HUMAN;tr|E7EPX0|E7EPX0_HUMAN;tr|A0A0A0MTC6|A0A0A0MTC6_HUMAN;tr|E7EVJ4|E7EVJ4_HUMAN;tr|E9PH62|E9PH62_HUMAN;sp|Q9NUL3|STAU2_HUMAN;tr|A0A0A0MTC5|A0A0A0MTC5_HUMAN;tr|G5EA18|G5EA18_HUMAN	1	1	1.27657e-06	1	1	1	1	783350	1	1	1	1	1	1	1	8;8;8;8;8;8;8;8;8;8;7;3;2	2;2;2;2;2;2;2;2;2;2;2;2;2	2;2;2;2;2;2;2;2;2;2;2;2;2	tr|E5RJN7|E5RJN7_HUMAN Double-stranded RNA-binding protein Staufen homolog 2 (Fragment) OS=Homo sapiens GN=STAU2 PE=1 SV=1;tr|A0A0A0MTC4|A0A0A0MTC4_HUMAN Double-stranded RNA-binding protein Staufen homolog 2 OS=Homo sapiens GN=STAU2 PE=1 SV=1;tr|A0A0A0MTD1	13	8	2	2	4	2	5	0	0	1	1	1	0	1	1	0	2	0	0	0	0	0	0	0	1	0	2	0	0
sp|P07196|NFL_HUMAN;tr|A0A087X0W2|A0A087X0W2_HUMAN;tr|A0A087WYG8|A0A087WYG8_HUMAN;sp|Q16352|AINX_HUMAN	sp|P07196|NFL_HUMAN;tr|A0A087X0W2|A0A087X0W2_HUMAN	1	7.85731e-07	1.32959e-06	1	1	1	1272700	752110	1	1	1	1	1	1	1	9;5;2;2	7;5;0;0	7;5;0;0	sp|P07196|NFL_HUMAN Neurofilament light polypeptide OS=Homo sapiens GN=NEFL PE=1 SV=3;tr|A0A087X0W2|A0A087X0W2_HUMAN Neurofilament light polypeptide OS=Homo sapiens GN=NEFL PE=1 SV=1	4	9	7	7	1	4	5	1	2	3	4	0	1	2	0	2	4	0	1	3	3	0	0	1	0	2	4	0	1
tr|C9JNV2|C9JNV2_HUMAN;sp|P41223|BUD31_HUMAN	tr|C9JNV2|C9JNV2_HUMAN;sp|P41223|BUD31_HUMAN	1	1	1.40015e-06	1	1	1	1	714210	1	1	1	1	1	1	1	2;2	2;2	2;2	tr|C9JNV2|C9JNV2_HUMAN Protein BUD31 homolog OS=Homo sapiens GN=BUD31 PE=1 SV=1;sp|P41223|BUD31_HUMAN Protein BUD31 homolog OS=Homo sapiens GN=BUD31 PE=1 SV=2	2	2	2	2	0	1	2	0	0	0	0	0	0	0	0	1	2	0	0	0	0	0	0	0	0	1	2	0	0
tr|B4DYT9|B4DYT9_HUMAN;sp|Q86TD4|SRCA_HUMAN	tr|B4DYT9|B4DYT9_HUMAN;sp|Q86TD4|SRCA_HUMAN	1	1	1.52851e-06	1	1	1	1	654230	1	1	1	1	1	1	1	2;1	1;1	1;1	tr|B4DYT9|B4DYT9_HUMAN Sarcalumenin OS=Homo sapiens GN=SRL PE=1 SV=1;sp|Q86TD4|SRCA_HUMAN Sarcalumenin OS=Homo sapiens GN=SRL PE=2 SV=2	2	2	1	1	1	1	1	1	1	1	1	1	1	1	0	0	1	0	0	0	0	0	0	0	0	0	1	0	0
sp|O14734|ACOT8_HUMAN;tr|H7C0M6|H7C0M6_HUMAN	sp|O14734|ACOT8_HUMAN;tr|H7C0M6|H7C0M6_HUMAN	1	1	1.56116e-06	1	1	1	1	640550	1	1	1	1	1	1	1	2;1	2;1	2;1	sp|O14734|ACOT8_HUMAN Acyl-coenzyme A thioesterase 8 OS=Homo sapiens GN=ACOT8 PE=1 SV=1;tr|H7C0M6|H7C0M6_HUMAN Sialoadhesin (Fragment) OS=Homo sapiens GN=SIGLEC1 PE=1 SV=1	2	2	2	2	1	0	2	0	0	0	0	0	0	0	1	0	2	0	0	0	0	0	0	0	1	0	2	0	0
tr|E9PE20|E9PE20_HUMAN;sp|P49458|SRP09_HUMAN	tr|E9PE20|E9PE20_HUMAN;sp|P49458|SRP09_HUMAN	1	1	1.61637e-06	1	1	1	1	618670	1	1	1	1	1	1	1	2;2	2;2	2;2	tr|E9PE20|E9PE20_HUMAN Signal recognition particle 9 kDa protein OS=Homo sapiens GN=SRP9 PE=1 SV=1;sp|P49458|SRP09_HUMAN Signal recognition particle 9 kDa protein OS=Homo sapiens GN=SRP9 PE=1 SV=2	2	2	2	2	1	0	1	0	0	0	0	0	0	0	1	0	1	0	0	0	0	0	0	0	1	0	1	0	0
sp|Q96AG4|LRC59_HUMAN	sp|Q96AG4|LRC59_HUMAN	1	1	1.7191e-06	1	1	1	1	581700	1	1	1	1	1	1	1	1	1	1	sp|Q96AG4|LRC59_HUMAN Leucine-rich repeat-containing protein 59 OS=Homo sapiens GN=LRRC59 PE=1 SV=1	1	1	1	1	0	1	1	0	0	0	0	0	0	0	0	1	1	0	0	0	0	0	0	0	0	1	1	0	0
sp|Q86Y07|VRK2_HUMAN	sp|Q86Y07|VRK2_HUMAN	1	1	1.71916e-06	1	1	1	1	581680	1	1	1	1	1	1	1	2	2	2	sp|Q86Y07|VRK2_HUMAN Serine/threonine-protein kinase VRK2 OS=Homo sapiens GN=VRK2 PE=1 SV=3	1	2	2	2	0	0	2	0	0	0	1	0	0	1	0	0	2	0	0	0	1	0	0	1	0	0	2	0	0
sp|O60870|KIN17_HUMAN;tr|S4R357|S4R357_HUMAN	sp|O60870|KIN17_HUMAN;tr|S4R357|S4R357_HUMAN	1	1	1.73467e-06	1	1	1	1	576480	1	1	1	1	1	1	1	2;1	2;1	2;1	sp|O60870|KIN17_HUMAN DNA/RNA-binding protein KIN17 OS=Homo sapiens GN=KIN PE=1 SV=2;tr|S4R357|S4R357_HUMAN DNA/RNA-binding protein KIN17 (Fragment) OS=Homo sapiens GN=KIN PE=1 SV=1	2	2	2	2	0	1	2	0	0	0	1	0	0	0	0	1	2	0	0	0	1	0	0	0	0	1	2	0	0
tr|F5H3K2|F5H3K2_HUMAN;tr|F5H8B7|F5H8B7_HUMAN;tr|E7ENF1|E7ENF1_HUMAN;sp|Q96C57|CL043_HUMAN;tr|A0A0G2JMC9|A0A0G2JMC9_HUMAN;tr|F5H4Y8|F5H4Y8_HUMAN	tr|F5H3K2|F5H3K2_HUMAN;tr|F5H8B7|F5H8B7_HUMAN;tr|E7ENF1|E7ENF1_HUMAN;sp|Q96C57|CL043_HUMAN;tr|A0A0G2JMC9|A0A0G2JMC9_HUMAN	1	1	2.00168e-06	1	1	1	1	499580	1	1	1	1	1	1	1	3;3;3;3;3;1	3;3;3;3;3;1	3;3;3;3;3;1	tr|F5H3K2|F5H3K2_HUMAN Uncharacterized protein C12orf43 (Fragment) OS=Homo sapiens GN=C12orf43 PE=1 SV=1;tr|F5H8B7|F5H8B7_HUMAN Uncharacterized protein C12orf43 (Fragment) OS=Homo sapiens GN=C12orf43 PE=1 SV=2;tr|E7ENF1|E7ENF1_HUMAN Uncharacterized protein	6	3	3	3	1	1	2	0	0	2	1	0	0	1	1	1	2	0	0	2	1	0	0	1	1	1	2	0	0
tr|A0A087WWP4|A0A087WWP4_HUMAN;sp|Q96T37|RBM15_HUMAN	tr|A0A087WWP4|A0A087WWP4_HUMAN;sp|Q96T37|RBM15_HUMAN	1	1	2.0429e-06	1	1	1	1	489500	1	1	1	1	1	1	1	3;3	3;3	3;3	tr|A0A087WWP4|A0A087WWP4_HUMAN Putative RNA-binding protein 15 OS=Homo sapiens GN=RBM15 PE=1 SV=1;sp|Q96T37|RBM15_HUMAN Putative RNA-binding protein 15 OS=Homo sapiens GN=RBM15 PE=1 SV=2	2	3	3	3	0	1	1	0	0	1	1	0	0	0	0	1	1	0	0	1	1	0	0	0	0	1	1	0	0
sp|Q9Y6M1|IF2B2_HUMAN;tr|F8W930|F8W930_HUMAN	sp|Q9Y6M1|IF2B2_HUMAN;tr|F8W930|F8W930_HUMAN	1	1	2.12242e-06	1	1	1	1	471160	1	1	1	1	1	1	1	4;4	3;3	3;3	sp|Q9Y6M1|IF2B2_HUMAN Insulin-like growth factor 2 mRNA-binding protein 2 OS=Homo sapiens GN=IGF2BP2 PE=1 SV=2;tr|F8W930|F8W930_HUMAN Insulin-like growth factor 2 mRNA-binding protein 2 OS=Homo sapiens GN=IGF2BP2 PE=1 SV=1	2	4	3	3	2	1	3	0	1	0	1	2	0	1	1	0	2	0	0	0	0	1	0	1	1	0	2	0	0
sp|Q7Z417|NUFP2_HUMAN	sp|Q7Z417|NUFP2_HUMAN	1	1	2.26907e-06	1	1	1	1	440710	1	1	1	1	1	1	1	2	2	2	sp|Q7Z417|NUFP2_HUMAN Nuclear fragile X mental retardation-interacting protein 2 OS=Homo sapiens GN=NUFIP2 PE=1 SV=1	1	2	2	2	1	1	1	0	0	0	0	0	0	0	1	1	1	0	0	0	0	0	0	0	1	1	1	0	0
sp|Q9NZB2|F120A_HUMAN;tr|A0A0C4DH52|A0A0C4DH52_HUMAN;tr|A0A0C4DG79|A0A0C4DG79_HUMAN	sp|Q9NZB2|F120A_HUMAN;tr|A0A0C4DH52|A0A0C4DH52_HUMAN;tr|A0A0C4DG79|A0A0C4DG79_HUMAN	1	1	2.33416e-06	1	1	1	1	428420	1	1	1	1	1	1	1	2;1;1	2;1;1	2;1;1	sp|Q9NZB2|F120A_HUMAN Constitutive coactivator of PPAR-gamma-like protein 1 OS=Homo sapiens GN=FAM120A PE=1 SV=2;tr|A0A0C4DH52|A0A0C4DH52_HUMAN Constitutive coactivator of PPAR-gamma-like protein 1 (Fragment) OS=Homo sapiens GN=FAM120A PE=1 SV=1;tr|A0A0C4D	3	2	2	2	1	1	1	0	0	0	0	0	0	0	1	1	1	0	0	0	0	0	0	0	1	1	1	0	0
tr|E9PMP7|E9PMP7_HUMAN;tr|F8WD26|F8WD26_HUMAN;tr|J3KP06|J3KP06_HUMAN;sp|Q8WWI1|LMO7_HUMAN;tr|E9PMS6|E9PMS6_HUMAN;tr|H0Y424|H0Y424_HUMAN;tr|A0A0A0MTE2|A0A0A0MTE2_HUMAN;tr|E9PMT2|E9PMT2_HUMAN	tr|E9PMP7|E9PMP7_HUMAN;tr|F8WD26|F8WD26_HUMAN;tr|J3KP06|J3KP06_HUMAN;sp|Q8WWI1|LMO7_HUMAN;tr|E9PMS6|E9PMS6_HUMAN	1	1	2.61253e-06	1	1	1	1	382770	1	1	1	1	1	1	1	3;3;3;3;2;1;1;1	3;3;3;3;2;1;1;1	3;3;3;3;2;1;1;1	tr|E9PMP7|E9PMP7_HUMAN LIM domain only protein 7 (Fragment) OS=Homo sapiens GN=LMO7 PE=1 SV=5;tr|F8WD26|F8WD26_HUMAN LIM domain only protein 7 OS=Homo sapiens GN=LMO7 PE=1 SV=2;tr|J3KP06|J3KP06_HUMAN LIM domain only protein 7 OS=Homo sapiens GN=LMO7 PE=1 S	8	3	3	3	0	0	2	0	0	2	1	0	0	0	0	0	2	0	0	2	1	0	0	0	0	0	2	0	0
sp|O95059|RPP14_HUMAN	sp|O95059|RPP14_HUMAN	1	1	2.63123e-06	1	1	1	1	380050	1	1	1	1	1	1	1	1	1	1	sp|O95059|RPP14_HUMAN Ribonuclease P protein subunit p14 OS=Homo sapiens GN=RPP14 PE=1 SV=3	1	1	1	1	0	1	1	0	0	0	0	0	0	0	0	1	1	0	0	0	0	0	0	0	0	1	1	0	0
sp|O00629|IMA3_HUMAN;tr|H7C4F6|H7C4F6_HUMAN	sp|O00629|IMA3_HUMAN	1	1	2.74484e-06	1	1	1	1	364320	1	1	1	1	1	1	1	3;1	2;1	2;1	sp|O00629|IMA3_HUMAN Importin subunit alpha-3 OS=Homo sapiens GN=KPNA4 PE=1 SV=1	2	3	2	2	0	2	1	0	0	0	0	1	0	0	0	1	1	0	0	0	0	0	0	0	0	1	1	0	0
tr|E9PJK2|E9PJK2_HUMAN;sp|O75530|EED_HUMAN;tr|E9PMU3|E9PMU3_HUMAN;tr|H0YEL4|H0YEL4_HUMAN	tr|E9PJK2|E9PJK2_HUMAN;sp|O75530|EED_HUMAN;tr|E9PMU3|E9PMU3_HUMAN;tr|H0YEL4|H0YEL4_HUMAN	1	1	2.79603e-06	1	1	1	1	357650	1	1	1	1	1	1	1	3;3;2;2	3;3;2;2	3;3;2;2	tr|E9PJK2|E9PJK2_HUMAN Polycomb protein EED OS=Homo sapiens GN=EED PE=1 SV=1;sp|O75530|EED_HUMAN Polycomb protein EED OS=Homo sapiens GN=EED PE=1 SV=2;tr|E9PMU3|E9PMU3_HUMAN Polycomb protein EED OS=Homo sapiens GN=EED PE=1 SV=1;tr|H0YEL4|H0YEL4_HUMAN Polyc	4	3	3	3	1	0	2	0	0	0	0	0	0	0	1	0	2	0	0	0	0	0	0	0	1	0	2	0	0
sp|O96019|ACL6A_HUMAN	sp|O96019|ACL6A_HUMAN	1	1	2.86148e-06	1	1	1	1	349470	1	1	1	1	1	1	1	1	1	1	sp|O96019|ACL6A_HUMAN Actin-like protein 6A OS=Homo sapiens GN=ACTL6A PE=1 SV=1	1	1	1	1	0	1	1	0	0	0	0	0	0	0	0	1	1	0	0	0	0	0	0	0	0	1	1	0	0
sp|Q8NDT2|RB15B_HUMAN	sp|Q8NDT2|RB15B_HUMAN	1	1	3.20883e-06	1	1	1	1	311640	1	1	1	1	1	1	1	2	2	2	sp|Q8NDT2|RB15B_HUMAN Putative RNA-binding protein 15B OS=Homo sapiens GN=RBM15B PE=1 SV=3	1	2	2	2	0	0	1	0	0	0	0	0	0	1	0	0	1	0	0	0	0	0	0	1	0	0	1	0	0
tr|B7Z4J8|B7Z4J8_HUMAN;sp|Q9UL40|ZN346_HUMAN;tr|D6RJ07|D6RJ07_HUMAN;tr|B7Z4N4|B7Z4N4_HUMAN;tr|B7Z6B6|B7Z6B6_HUMAN;tr|B7Z6Q2|B7Z6Q2_HUMAN	tr|B7Z4J8|B7Z4J8_HUMAN;sp|Q9UL40|ZN346_HUMAN;tr|D6RJ07|D6RJ07_HUMAN;tr|B7Z4N4|B7Z4N4_HUMAN;tr|B7Z6B6|B7Z6B6_HUMAN;tr|B7Z6Q2|B7Z6Q2_HUMAN	1	1	3.22685e-06	1	1	1	1	309900	1	1	1	1	1	1	1	2;2;2;2;1;1	2;2;2;2;1;1	2;2;2;2;1;1	tr|B7Z4J8|B7Z4J8_HUMAN Zinc finger protein 346 OS=Homo sapiens GN=ZNF346 PE=1 SV=1;sp|Q9UL40|ZN346_HUMAN Zinc finger protein 346 OS=Homo sapiens GN=ZNF346 PE=1 SV=1;tr|D6RJ07|D6RJ07_HUMAN Zinc finger protein 346 OS=Homo sapiens GN=ZNF346 PE=1 SV=1;tr|B7Z4N	6	2	2	2	1	0	1	0	0	1	0	0	0	0	1	0	1	0	0	1	0	0	0	0	1	0	1	0	0
sp|P35251|RFC1_HUMAN;tr|H0Y8U4|H0Y8U4_HUMAN	sp|P35251|RFC1_HUMAN;tr|H0Y8U4|H0Y8U4_HUMAN	1	1	3.3695e-06	1	1	1	1	296780	1	1	1	1	1	1	1	2;1	2;1	2;1	sp|P35251|RFC1_HUMAN Replication factor C subunit 1 OS=Homo sapiens GN=RFC1 PE=1 SV=4;tr|H0Y8U4|H0Y8U4_HUMAN Replication factor C subunit 1 (Fragment) OS=Homo sapiens GN=RFC1 PE=1 SV=1	2	2	2	2	0	0	1	0	0	0	1	0	0	0	0	0	1	0	0	0	1	0	0	0	0	0	1	0	0
sp|Q9HCS7|SYF1_HUMAN	sp|Q9HCS7|SYF1_HUMAN	1	1	3.50103e-06	1	1	1	1	285630	1	1	1	1	1	1	1	2	2	2	sp|Q9HCS7|SYF1_HUMAN Pre-mRNA-splicing factor SYF1 OS=Homo sapiens GN=XAB2 PE=1 SV=2	1	2	2	2	0	0	2	0	0	0	0	0	0	0	0	0	2	0	0	0	0	0	0	0	0	0	2	0	0
sp|Q9Y5B6|PAXB1_HUMAN	sp|Q9Y5B6|PAXB1_HUMAN	1	1	3.9557e-06	1	1	1	1	252800	1	1	1	1	1	1	1	1	1	1	sp|Q9Y5B6|PAXB1_HUMAN PAX3- and PAX7-binding protein 1 OS=Homo sapiens GN=PAXBP1 PE=1 SV=2	1	1	1	1	0	0	1	0	0	0	0	0	0	0	0	0	1	0	0	0	0	0	0	0	0	0	1	0	0
sp|Q9UJA5|TRM6_HUMAN	sp|Q9UJA5|TRM6_HUMAN	1	1	4.19129e-06	1	1	1	1	238590	1	1	1	1	1	1	1	1	1	1	sp|Q9UJA5|TRM6_HUMAN tRNA (adenine(58)-N(1))-methyltransferase non-catalytic subunit TRM6 OS=Homo sapiens GN=TRMT6 PE=1 SV=1	1	1	1	1	0	0	1	0	0	0	0	0	0	0	0	0	1	0	0	0	0	0	0	0	0	0	1	0	0
tr|H7BZW6|H7BZW6_HUMAN;sp|O00422|SAP18_HUMAN;tr|X6RAL5|X6RAL5_HUMAN	tr|H7BZW6|H7BZW6_HUMAN;sp|O00422|SAP18_HUMAN;tr|X6RAL5|X6RAL5_HUMAN	1	1	4.64987e-06	1	1	1	1	215060	1	1	1	1	1	1	1	2;2;2	2;2;2	2;2;2	tr|H7BZW6|H7BZW6_HUMAN Histone deacetylase complex subunit SAP18 (Fragment) OS=Homo sapiens GN=SAP18 PE=1 SV=2;sp|O00422|SAP18_HUMAN Histone deacetylase complex subunit SAP18 OS=Homo sapiens GN=SAP18 PE=1 SV=1;tr|X6RAL5|X6RAL5_HUMAN Histone deacetylase com	3	2	2	2	0	1	1	0	0	0	0	0	0	0	0	1	1	0	0	0	0	0	0	0	0	1	1	0	0
sp|P52294|IMA5_HUMAN;tr|H0Y3K0|H0Y3K0_HUMAN;tr|C9J352|C9J352_HUMAN;tr|C9JWD9|C9JWD9_HUMAN;tr|F2Z3G4|F2Z3G4_HUMAN;tr|C9J4U1|C9J4U1_HUMAN;tr|C9JYI4|C9JYI4_HUMAN;sp|O60684|IMA7_HUMAN;sp|O15131|IMA6_HUMAN	sp|P52294|IMA5_HUMAN;tr|H0Y3K0|H0Y3K0_HUMAN;tr|C9J352|C9J352_HUMAN;tr|C9JWD9|C9JWD9_HUMAN;tr|F2Z3G4|F2Z3G4_HUMAN;tr|C9J4U1|C9J4U1_HUMAN;tr|C9JYI4|C9JYI4_HUMAN;sp|O60684|IMA7_HUMAN;sp|O15131|IMA6_HUMAN	1	1	4.761e-06	1	1	1	1	210040	1	1	1	1	1	1	1	2;1;1;1;1;1;1;1;1	2;1;1;1;1;1;1;1;1	2;1;1;1;1;1;1;1;1	sp|P52294|IMA5_HUMAN Importin subunit alpha-5 OS=Homo sapiens GN=KPNA1 PE=1 SV=3;tr|H0Y3K0|H0Y3K0_HUMAN Importin subunit alpha-6 (Fragment) OS=Homo sapiens GN=KPNA5 PE=4 SV=1;tr|C9J352|C9J352_HUMAN Importin subunit alpha-5 (Fragment) OS=Homo sapiens GN=KPN	9	2	2	2	1	1	1	0	0	1	0	0	0	0	1	1	1	0	0	1	0	0	0	0	1	1	1	0	0
sp|P60228|EIF3E_HUMAN;tr|E5RGA2|E5RGA2_HUMAN;tr|E5RHS5|E5RHS5_HUMAN;tr|E5RIT4|E5RIT4_HUMAN;tr|H0YAW4|H0YAW4_HUMAN;tr|H0YBR5|H0YBR5_HUMAN	sp|P60228|EIF3E_HUMAN;tr|E5RGA2|E5RGA2_HUMAN;tr|E5RHS5|E5RHS5_HUMAN	1	1	5.35131e-06	1	1	1	1	186870	1	1	1	1	1	1	1	3;2;2;1;1;1	3;2;2;1;1;1	3;2;2;1;1;1	sp|P60228|EIF3E_HUMAN Eukaryotic translation initiation factor 3 subunit E OS=Homo sapiens GN=EIF3E PE=1 SV=1;tr|E5RGA2|E5RGA2_HUMAN Eukaryotic translation initiation factor 3 subunit E OS=Homo sapiens GN=EIF3E PE=1 SV=1;tr|E5RHS5|E5RHS5_HUMAN Eukaryotic t	6	3	3	3	1	1	1	0	1	0	1	0	0	1	1	1	1	0	1	0	1	0	0	1	1	1	1	0	1
sp|Q8N5C6|SRBD1_HUMAN	sp|Q8N5C6|SRBD1_HUMAN	1	1	5.99772e-06	1	1	1	1	166730	1	1	1	1	1	1	1	2	2	2	sp|Q8N5C6|SRBD1_HUMAN S1 RNA-binding domain-containing protein 1 OS=Homo sapiens GN=SRBD1 PE=1 SV=2	1	2	2	2	1	0	1	0	0	0	0	0	0	0	1	0	1	0	0	0	0	0	0	0	1	0	1	0	0
sp|P01034|CYTC_HUMAN	sp|P01034|CYTC_HUMAN	1	2.52404e-08	1	1	1	1	39619000	1	1	1	1	1	1	1	1	1	1	1	sp|P01034|CYTC_HUMAN Cystatin-C OS=Homo sapiens GN=CST3 PE=1 SV=1	1	1	1	1	0	1	0	0	0	0	0	0	0	0	0	1	0	0	0	0	0	0	0	0	0	1	0	0	0
tr|B4DUR8|B4DUR8_HUMAN;sp|P49368|TCPG_HUMAN	tr|B4DUR8|B4DUR8_HUMAN;sp|P49368|TCPG_HUMAN	1	1.36565e-07	1	1	1	1	7322500	1	1	1	1	1	1	1	1	4;4	4;4	4;4	tr|B4DUR8|B4DUR8_HUMAN T-complex protein 1 subunit gamma OS=Homo sapiens GN=CCT3 PE=1 SV=1;sp|P49368|TCPG_HUMAN T-complex protein 1 subunit gamma OS=Homo sapiens GN=CCT3 PE=1 SV=4	2	4	4	4	0	3	0	0	0	1	0	0	0	0	0	3	0	0	0	1	0	0	0	0	0	3	0	0	0
sp|Q8WW22|DNJA4_HUMAN	sp|Q8WW22|DNJA4_HUMAN	1	4.59095e-07	1	1	1	1	2178200	1	1	1	1	1	1	1	1	4	4	4	sp|Q8WW22|DNJA4_HUMAN DnaJ homolog subfamily A member 4 OS=Homo sapiens GN=DNAJA4 PE=1 SV=1	1	4	4	4	2	3	1	0	0	1	1	0	0	1	2	3	1	0	0	1	1	0	0	1	2	3	1	0	0
sp|Q9BPZ2|SPI2B_HUMAN;sp|Q99865|SPI2A_HUMAN;tr|Q5JZB8|Q5JZB8_HUMAN;tr|Q5JZB7|Q5JZB7_HUMAN;tr|A0A087X074|A0A087X074_HUMAN	sp|Q9BPZ2|SPI2B_HUMAN;sp|Q99865|SPI2A_HUMAN;tr|Q5JZB8|Q5JZB8_HUMAN;tr|Q5JZB7|Q5JZB7_HUMAN;tr|A0A087X074|A0A087X074_HUMAN	1	5.21512e-07	1	1	1	1	1917500	1	1	1	1	1	1	1	1	6;6;5;4;4	5;5;5;3;3	5;5;5;3;3	sp|Q9BPZ2|SPI2B_HUMAN Spindlin-2B OS=Homo sapiens GN=SPIN2B PE=2 SV=1;sp|Q99865|SPI2A_HUMAN Spindlin-2A OS=Homo sapiens GN=SPIN2A PE=1 SV=3;tr|Q5JZB8|Q5JZB8_HUMAN Spindlin-2B (Fragment) OS=Homo sapiens GN=SPIN2B PE=4 SV=1;tr|Q5JZB7|Q5JZB7_HUMAN Spindlin-2B	5	6	5	5	3	2	1	1	0	2	2	0	0	0	3	2	1	1	0	2	1	0	0	0	3	2	1	1	0
sp|Q5QFB9|PAPAS_HUMAN	sp|Q5QFB9|PAPAS_HUMAN	1	5.46508e-07	1	1	1	1	1829800	1	1	1	1	1	1	1	1	4	3	3	sp|Q5QFB9|PAPAS_HUMAN Protein PAPPAS OS=Homo sapiens GN=PAPPA-AS1 PE=5 SV=1	1	4	3	3	1	2	0	0	1	1	2	0	0	1	1	2	0	0	1	0	2	0	0	1	1	2	0	0	1
sp|Q9BWJ5|SF3B5_HUMAN	sp|Q9BWJ5|SF3B5_HUMAN	1	6.86813e-07	1	1	1	1	1456000	1	1	1	1	1	1	1	1	2	2	2	sp|Q9BWJ5|SF3B5_HUMAN Splicing factor 3B subunit 5 OS=Homo sapiens GN=SF3B5 PE=1 SV=1	1	2	2	2	1	2	1	1	0	1	1	1	0	0	1	2	1	1	0	1	1	1	0	0	1	2	1	1	0
sp|Q76KP1|B4GN4_HUMAN	sp|Q76KP1|B4GN4_HUMAN	1	7.61209e-07	1	1	1	1	1313700	1	1	1	1	1	1	1	1	1	1	1	sp|Q76KP1|B4GN4_HUMAN N-acetyl-beta-glucosaminyl-glycoprotein 4-beta-N-acetylgalactosaminyltransferase 1 OS=Homo sapiens GN=B4GALNT4 PE=1 SV=1	1	1	1	1	0	1	0	0	0	0	0	0	0	0	0	1	0	0	0	0	0	0	0	0	0	1	0	0	0
sp|Q71F23|CENPU_HUMAN;tr|Q09GN1|Q09GN1_HUMAN	sp|Q71F23|CENPU_HUMAN;tr|Q09GN1|Q09GN1_HUMAN	1	7.68699e-07	1	1	1	1	1300900	1	1	1	1	1	1	1	1	2;1	2;1	2;1	sp|Q71F23|CENPU_HUMAN Centromere protein U OS=Homo sapiens GN=CENPU PE=1 SV=1;tr|Q09GN1|Q09GN1_HUMAN Centromere protein U OS=Homo sapiens GN=MLF1IP PE=1 SV=1	2	2	2	2	0	2	0	0	0	0	1	0	0	0	0	2	0	0	0	0	1	0	0	0	0	2	0	0	0
sp|Q9NP73|ALG13_HUMAN;tr|A0A096LPI3|A0A096LPI3_HUMAN	sp|Q9NP73|ALG13_HUMAN	1	7.89827e-07	1	1	1	1	1266100	1	1	1	1	1	1	1	1	4;1	4;1	4;1	sp|Q9NP73|ALG13_HUMAN Putative bifunctional UDP-N-acetylglucosamine transferase and deubiquitinase ALG13 OS=Homo sapiens GN=ALG13 PE=1 SV=2	2	4	4	4	1	4	0	0	0	0	0	0	0	0	1	4	0	0	0	0	0	0	0	0	1	4	0	0	0
tr|K7ERD7|K7ERD7_HUMAN;sp|O95707|RPP29_HUMAN;tr|K7ESH8|K7ESH8_HUMAN;tr|K7EK50|K7EK50_HUMAN;tr|A0A0A0MQS4|A0A0A0MQS4_HUMAN	tr|K7ERD7|K7ERD7_HUMAN;sp|O95707|RPP29_HUMAN;tr|K7ESH8|K7ESH8_HUMAN;tr|K7EK50|K7EK50_HUMAN;tr|A0A0A0MQS4|A0A0A0MQS4_HUMAN	1	8.32709e-07	1	1	1	1	1200900	1	1	1	1	1	1	1	1	2;2;1;1;1	2;2;1;1;1	2;2;1;1;1	tr|K7ERD7|K7ERD7_HUMAN Ribonuclease P protein subunit p29 (Fragment) OS=Homo sapiens GN=POP4 PE=1 SV=1;sp|O95707|RPP29_HUMAN Ribonuclease P protein subunit p29 OS=Homo sapiens GN=POP4 PE=1 SV=2;tr|K7ESH8|K7ESH8_HUMAN Ribonuclease P protein subunit p29 OS=H	5	2	2	2	1	2	0	0	0	0	1	1	0	0	1	2	0	0	0	0	1	1	0	0	1	2	0	0	0
tr|Q96G26|Q96G26_HUMAN;sp|Q9Y483|MTF2_HUMAN;tr|D6RIZ7|D6RIZ7_HUMAN	tr|Q96G26|Q96G26_HUMAN;sp|Q9Y483|MTF2_HUMAN;tr|D6RIZ7|D6RIZ7_HUMAN	1	8.52079e-07	1	1	1	1	1173600	1	1	1	1	1	1	1	1	2;2;2	2;2;2	2;2;2	tr|Q96G26|Q96G26_HUMAN MTF2 protein OS=Homo sapiens GN=MTF2 PE=1 SV=1;sp|Q9Y483|MTF2_HUMAN Metal-response element-binding transcription factor 2 OS=Homo sapiens GN=MTF2 PE=1 SV=2;tr|D6RIZ7|D6RIZ7_HUMAN T-complex protein 1 subunit epsilon OS=Homo sapiens GN	3	2	2	2	0	2	0	0	0	0	0	0	0	1	0	2	0	0	0	0	0	0	0	1	0	2	0	0	0
sp|P35249|RFC4_HUMAN;tr|H7C1P0|H7C1P0_HUMAN;tr|C9JXZ7|C9JXZ7_HUMAN;tr|C9JTT7|C9JTT7_HUMAN;tr|C9J8M3|C9J8M3_HUMAN;tr|C9JZI1|C9JZI1_HUMAN	sp|P35249|RFC4_HUMAN;tr|H7C1P0|H7C1P0_HUMAN;tr|C9JXZ7|C9JXZ7_HUMAN;tr|C9JTT7|C9JTT7_HUMAN;tr|C9J8M3|C9J8M3_HUMAN;tr|C9JZI1|C9JZI1_HUMAN	1	8.58811e-07	1	1	1	1	1164400	1	1	1	1	1	1	1	1	2;1;1;1;1;1	2;1;1;1;1;1	2;1;1;1;1;1	sp|P35249|RFC4_HUMAN Replication factor C subunit 4 OS=Homo sapiens GN=RFC4 PE=1 SV=2;tr|H7C1P0|H7C1P0_HUMAN Replication factor C subunit 4 (Fragment) OS=Homo sapiens GN=RFC4 PE=1 SV=1;tr|C9JXZ7|C9JXZ7_HUMAN Replication factor C subunit 4 (Fragment) OS=Hom	6	2	2	2	1	2	1	0	0	1	1	1	0	1	1	2	1	0	0	1	1	1	0	1	1	2	1	0	0
sp|Q8N7H5|PAF1_HUMAN;tr|B4DGJ5|B4DGJ5_HUMAN	sp|Q8N7H5|PAF1_HUMAN;tr|B4DGJ5|B4DGJ5_HUMAN	1	8.84251e-07	1	1	1	1	1130900	1	1	1	1	1	1	1	1	4;2	4;2	4;2	sp|Q8N7H5|PAF1_HUMAN RNA polymerase II-associated factor 1 homolog OS=Homo sapiens GN=PAF1 PE=1 SV=2;tr|B4DGJ5|B4DGJ5_HUMAN RNA polymerase II-associated factor 1 homolog OS=Homo sapiens GN=PAF1 PE=1 SV=1	2	4	4	4	1	3	1	0	0	0	0	0	0	0	1	3	1	0	0	0	0	0	0	0	1	3	1	0	0
sp|O43823|AKAP8_HUMAN	sp|O43823|AKAP8_HUMAN	1	9.71723e-07	1	1	1	1	1029100	1	1	1	1	1	1	1	1	4	4	4	sp|O43823|AKAP8_HUMAN A-kinase anchor protein 8 OS=Homo sapiens GN=AKAP8 PE=1 SV=1	1	4	4	4	0	2	1	0	1	3	1	1	0	2	0	2	1	0	1	3	1	1	0	2	0	2	1	0	1
sp|Q9H0M0|WWP1_HUMAN	sp|Q9H0M0|WWP1_HUMAN	1	1.04811e-06	1	1	1	1	954100	1	1	1	1	1	1	1	1	1	1	1	sp|Q9H0M0|WWP1_HUMAN NEDD4-like E3 ubiquitin-protein ligase WWP1 OS=Homo sapiens GN=WWP1 PE=1 SV=1	1	1	1	1	0	1	0	0	0	1	0	0	0	0	0	1	0	0	0	1	0	0	0	0	0	1	0	0	0
tr|E9PF10|E9PF10_HUMAN;sp|O75694|NU155_HUMAN	tr|E9PF10|E9PF10_HUMAN;sp|O75694|NU155_HUMAN	1	1.0593e-06	1	1	1	1	944020	1	1	1	1	1	1	1	1	3;3	3;3	3;3	tr|E9PF10|E9PF10_HUMAN Nuclear pore complex protein Nup155 OS=Homo sapiens GN=NUP155 PE=1 SV=1;sp|O75694|NU155_HUMAN Nuclear pore complex protein Nup155 OS=Homo sapiens GN=NUP155 PE=1 SV=1	2	3	3	3	1	2	0	0	0	0	1	1	0	0	1	2	0	0	0	0	1	1	0	0	1	2	0	0	0
tr|H7C2W9|H7C2W9_HUMAN;tr|C9JU56|C9JU56_HUMAN;tr|B7Z4E3|B7Z4E3_HUMAN;sp|P62899|RL31_HUMAN;tr|B7Z4C8|B7Z4C8_HUMAN;tr|B8ZZK4|B8ZZK4_HUMAN	tr|H7C2W9|H7C2W9_HUMAN;tr|C9JU56|C9JU56_HUMAN;tr|B7Z4E3|B7Z4E3_HUMAN;sp|P62899|RL31_HUMAN;tr|B7Z4C8|B7Z4C8_HUMAN;tr|B8ZZK4|B8ZZK4_HUMAN	1	1.06289e-06	1	1	1	1	940830	1	1	1	1	1	1	1	1	2;2;2;2;2;1	2;2;2;2;2;1	2;2;2;2;2;1	tr|H7C2W9|H7C2W9_HUMAN 60S ribosomal protein L31 (Fragment) OS=Homo sapiens GN=RPL31 PE=1 SV=1;tr|C9JU56|C9JU56_HUMAN 60S ribosomal protein L31 (Fragment) OS=Homo sapiens GN=RPL31 PE=1 SV=1;tr|B7Z4E3|B7Z4E3_HUMAN 60S ribosomal protein L31 OS=Homo sapiens G	6	2	2	2	1	2	1	0	0	0	1	0	0	0	1	2	1	0	0	0	1	0	0	0	1	2	1	0	0
sp|Q8WUD4|CCD12_HUMAN;tr|G3V3A0|G3V3A0_HUMAN	sp|Q8WUD4|CCD12_HUMAN;tr|G3V3A0|G3V3A0_HUMAN	1	1.13102e-06	1	1	1	1	884160	1	1	1	1	1	1	1	1	2;2	2;2	2;2	sp|Q8WUD4|CCD12_HUMAN Coiled-coil domain-containing protein 12 OS=Homo sapiens GN=CCDC12 PE=1 SV=1;tr|G3V3A0|G3V3A0_HUMAN Alpha-1-antichymotrypsin OS=Homo sapiens GN=SERPINA3 PE=1 SV=1	2	2	2	2	0	2	0	0	0	0	0	0	0	1	0	2	0	0	0	0	0	0	0	1	0	2	0	0	0
sp|Q9NYU2|UGGG1_HUMAN	sp|Q9NYU2|UGGG1_HUMAN	1	1.14792e-06	1	1	1	1	871140	1	1	1	1	1	1	1	1	2	2	2	sp|Q9NYU2|UGGG1_HUMAN UDP-glucose:glycoprotein glucosyltransferase 1 OS=Homo sapiens GN=UGGT1 PE=1 SV=3	1	2	2	2	0	2	0	0	0	0	0	0	0	0	0	2	0	0	0	0	0	0	0	0	0	2	0	0	0
sp|Q01081|U2AF1_HUMAN;tr|K7EJM7|K7EJM7_HUMAN;tr|M0R2N4|M0R2N4_HUMAN;sp|Q8WU68|U2AF4_HUMAN;tr|K7EJH3|K7EJH3_HUMAN;tr|M0QYK5|M0QYK5_HUMAN	sp|Q01081|U2AF1_HUMAN;tr|K7EJM7|K7EJM7_HUMAN;tr|M0R2N4|M0R2N4_HUMAN;sp|Q8WU68|U2AF4_HUMAN;tr|K7EJH3|K7EJH3_HUMAN;tr|M0QYK5|M0QYK5_HUMAN	1	1.2044e-06	1	1	1	1	830290	1	1	1	1	1	1	1	1	3;2;2;2;2;2	3;2;2;2;2;2	3;2;2;2;2;2	sp|Q01081|U2AF1_HUMAN Splicing factor U2AF 35 kDa subunit OS=Homo sapiens GN=U2AF1 PE=1 SV=3;tr|K7EJM7|K7EJM7_HUMAN Splicing factor U2AF 26 kDa subunit OS=Homo sapiens GN=U2AF1L4 PE=4 SV=1;tr|M0R2N4|M0R2N4_HUMAN Uncharacterized protein OS=Homo sapiens PE=4	6	3	3	3	0	2	1	0	1	0	2	1	0	0	0	2	1	0	1	0	2	1	0	0	0	2	1	0	1
sp|Q9Y3F4|STRAP_HUMAN;tr|H0YH33|H0YH33_HUMAN	sp|Q9Y3F4|STRAP_HUMAN	1	1.22384e-06	1	1	1	1	817100	1	1	1	1	1	1	1	1	5;1	5;1	5;1	sp|Q9Y3F4|STRAP_HUMAN Serine-threonine kinase receptor-associated protein OS=Homo sapiens GN=STRAP PE=1 SV=1	2	5	5	5	1	2	0	0	1	1	0	1	0	2	1	2	0	0	1	1	0	1	0	2	1	2	0	0	1
sp|O00303|EIF3F_HUMAN;tr|H0YDT6|H0YDT6_HUMAN;tr|E9PQV8|E9PQV8_HUMAN	sp|O00303|EIF3F_HUMAN	1	1.35062e-06	1	1	1	1	740400	1	1	1	1	1	1	1	1	4;1;1	4;1;1	4;1;1	sp|O00303|EIF3F_HUMAN Eukaryotic translation initiation factor 3 subunit F OS=Homo sapiens GN=EIF3F PE=1 SV=1	3	4	4	4	1	2	0	0	0	0	2	1	0	2	1	2	0	0	0	0	2	1	0	2	1	2	0	0	0
sp|Q9NPE3|NOP10_HUMAN;tr|H0YM60|H0YM60_HUMAN	sp|Q9NPE3|NOP10_HUMAN	1	1.35768e-06	1	1	1	1	736550	1	1	1	1	1	1	1	1	3;1	3;1	3;1	sp|Q9NPE3|NOP10_HUMAN H/ACA ribonucleoprotein complex subunit 3 OS=Homo sapiens GN=NOP10 PE=1 SV=1	2	3	3	3	1	1	1	0	0	1	0	0	0	0	1	1	1	0	0	1	0	0	0	0	1	1	1	0	0
tr|B0QYD3|B0QYD3_HUMAN;sp|Q9UH17|ABC3B_HUMAN;sp|P31941|ABC3A_HUMAN	tr|B0QYD3|B0QYD3_HUMAN;sp|Q9UH17|ABC3B_HUMAN	1	1.505e-06	1	1	1	1	664450	1	1	1	1	1	1	1	1	3;3;1	3;3;1	2;2;1	tr|B0QYD3|B0QYD3_HUMAN DNA dC->dU-editing enzyme APOBEC-3B OS=Homo sapiens GN=APOBEC3B PE=1 SV=1;sp|Q9UH17|ABC3B_HUMAN DNA dC->dU-editing enzyme APOBEC-3B OS=Homo sapiens GN=APOBEC3B PE=1 SV=1	3	3	3	2	1	2	1	0	0	1	0	0	0	1	1	2	1	0	0	1	0	0	0	1	0	2	0	0	0
sp|Q3KQU3|MA7D1_HUMAN	sp|Q3KQU3|MA7D1_HUMAN	1	1.64449e-06	1	1	1	1	608090	1	1	1	1	1	1	1	1	3	3	3	sp|Q3KQU3|MA7D1_HUMAN MAP7 domain-containing protein 1 OS=Homo sapiens GN=MAP7D1 PE=1 SV=1	1	3	3	3	0	3	0	0	0	0	1	0	0	1	0	3	0	0	0	0	1	0	0	1	0	3	0	0	0
sp|P61326|MGN_HUMAN;tr|F5H6P7|F5H6P7_HUMAN;tr|F5H3U9|F5H3U9_HUMAN	sp|P61326|MGN_HUMAN;tr|F5H6P7|F5H6P7_HUMAN	1	1.67442e-06	1	1	1	1	597220	1	1	1	1	1	1	1	1	9;6;3	1;0;0	1;0;0	sp|P61326|MGN_HUMAN Protein mago nashi homolog OS=Homo sapiens GN=MAGOH PE=1 SV=1;tr|F5H6P7|F5H6P7_HUMAN Protein mago nashi homolog 2 OS=Homo sapiens GN=MAGOHB PE=4 SV=1	3	9	1	1	3	7	5	5	5	6	5	4	4	8	0	1	0	0	0	0	0	0	0	0	0	1	0	0	0
sp|Q9ULG1|INO80_HUMAN;tr|H0YMN5|H0YMN5_HUMAN	sp|Q9ULG1|INO80_HUMAN;tr|H0YMN5|H0YMN5_HUMAN	1	1.74706e-06	1	1	1	1	572390	1	1	1	1	1	1	1	1	2;1	2;1	2;1	sp|Q9ULG1|INO80_HUMAN DNA helicase INO80 OS=Homo sapiens GN=INO80 PE=1 SV=2;tr|H0YMN5|H0YMN5_HUMAN DNA helicase INO80 OS=Homo sapiens GN=INO80 PE=1 SV=1	2	2	2	2	1	2	0	0	0	0	1	0	0	1	1	2	0	0	0	0	1	0	0	1	1	2	0	0	0
sp|Q9UKX7|NUP50_HUMAN;tr|B0QY21|B0QY21_HUMAN	sp|Q9UKX7|NUP50_HUMAN	1	1.88701e-06	1	1	1	1	529940	1	1	1	1	1	1	1	1	3;1	3;1	3;1	sp|Q9UKX7|NUP50_HUMAN Nuclear pore complex protein Nup50 OS=Homo sapiens GN=NUP50 PE=1 SV=2	2	3	3	3	0	2	1	0	0	1	0	0	0	0	0	2	1	0	0	1	0	0	0	0	0	2	1	0	0
sp|Q6ZQY3|GADL1_HUMAN	sp|Q6ZQY3|GADL1_HUMAN	1	1.91876e-06	1	1	1	1	521170	1	1	1	1	1	1	1	1	1	1	1	sp|Q6ZQY3|GADL1_HUMAN Acidic amino acid decarboxylase GADL1 OS=Homo sapiens GN=GADL1 PE=1 SV=4	1	1	1	1	0	1	0	0	0	0	0	0	0	0	0	1	0	0	0	0	0	0	0	0	0	1	0	0	0
sp|Q96SI9|STRBP_HUMAN	sp|Q96SI9|STRBP_HUMAN	1	1.94466e-06	1	1	1	1	514230	1	1	1	1	1	1	1	1	4	1	1	sp|Q96SI9|STRBP_HUMAN Spermatid perinuclear RNA-binding protein OS=Homo sapiens GN=STRBP PE=1 SV=1	1	4	1	1	1	4	3	2	1	1	1	1	2	2	0	1	0	0	0	0	0	0	0	0	0	1	0	0	0
tr|J3QQW9|J3QQW9_HUMAN;sp|Q15022|SUZ12_HUMAN	tr|J3QQW9|J3QQW9_HUMAN;sp|Q15022|SUZ12_HUMAN	1	2.26178e-06	1	1	1	1	442130	1	1	1	1	1	1	1	1	2;2	2;2	2;2	tr|J3QQW9|J3QQW9_HUMAN Polycomb protein SUZ12 OS=Homo sapiens GN=SUZ12 PE=1 SV=1;sp|Q15022|SUZ12_HUMAN Polycomb protein SUZ12 OS=Homo sapiens GN=SUZ12 PE=1 SV=3	2	2	2	2	0	1	1	0	0	0	0	0	0	0	0	1	1	0	0	0	0	0	0	0	0	1	1	0	0
tr|A2IDA3|A2IDA3_HUMAN;sp|P29372|3MG_HUMAN	tr|A2IDA3|A2IDA3_HUMAN;sp|P29372|3MG_HUMAN	1	2.63706e-06	1	1	1	1	379210	1	1	1	1	1	1	1	1	2;2	2;2	2;2	tr|A2IDA3|A2IDA3_HUMAN DNA-3-methyladenine glycosylase (Fragment) OS=Homo sapiens GN=MPG PE=1 SV=1;sp|P29372|3MG_HUMAN DNA-3-methyladenine glycosylase OS=Homo sapiens GN=MPG PE=1 SV=3	2	2	2	2	0	1	0	0	0	1	0	0	0	0	0	1	0	0	0	1	0	0	0	0	0	1	0	0	0
tr|H3BPZ1|H3BPZ1_HUMAN;sp|Q9P035|HACD3_HUMAN;tr|H3BS72|H3BS72_HUMAN;tr|H3BMZ1|H3BMZ1_HUMAN;tr|H3BRL8|H3BRL8_HUMAN	tr|H3BPZ1|H3BPZ1_HUMAN;sp|Q9P035|HACD3_HUMAN;tr|H3BS72|H3BS72_HUMAN	1	3.17834e-06	1	1	1	1	314630	1	1	1	1	1	1	1	1	3;3;3;1;1	3;3;3;1;1	3;3;3;1;1	tr|H3BPZ1|H3BPZ1_HUMAN Very-long-chain (3R)-3-hydroxyacyl-CoA dehydratase 3 OS=Homo sapiens GN=HACD3 PE=1 SV=1;sp|Q9P035|HACD3_HUMAN Very-long-chain (3R)-3-hydroxyacyl-CoA dehydratase 3 OS=Homo sapiens GN=HACD3 PE=1 SV=2;tr|H3BS72|H3BS72_HUMAN Very-long-ch	5	3	3	3	1	1	1	0	0	1	0	0	0	0	1	1	1	0	0	1	0	0	0	0	1	1	1	0	0
sp|P28370|SMCA1_HUMAN;tr|A0A0A0MRP6|A0A0A0MRP6_HUMAN;tr|B7ZLQ5|B7ZLQ5_HUMAN	sp|P28370|SMCA1_HUMAN;tr|A0A0A0MRP6|A0A0A0MRP6_HUMAN;tr|B7ZLQ5|B7ZLQ5_HUMAN	1	4.73552e-06	1	1	1	1	211170	1	1	1	1	1	1	1	1	8;8;8	1;1;1	1;1;1	sp|P28370|SMCA1_HUMAN Probable global transcription activator SNF2L1 OS=Homo sapiens GN=SMARCA1 PE=1 SV=2;tr|A0A0A0MRP6|A0A0A0MRP6_HUMAN Probable global transcription activator SNF2L1 OS=Homo sapiens GN=SMARCA1 PE=1 SV=1;tr|B7ZLQ5|B7ZLQ5_HUMAN Probable glo	3	8	1	1	3	4	4	0	6	2	4	4	0	4	0	1	0	0	0	0	0	0	0	0	0	1	0	0	0
sp|P51587|BRCA2_HUMAN	sp|P51587|BRCA2_HUMAN	1	4.77737e-06	1	1	1	1	209320	1	1	1	1	1	1	1	1	1	1	1	sp|P51587|BRCA2_HUMAN Breast cancer type 2 susceptibility protein OS=Homo sapiens GN=BRCA2 PE=1 SV=2	1	1	1	1	0	1	0	0	0	0	0	0	0	0	0	1	0	0	0	0	0	0	0	0	0	1	0	0	0
sp|O60231|DHX16_HUMAN;tr|A0A0G2JNQ6|A0A0G2JNQ6_HUMAN	sp|O60231|DHX16_HUMAN;tr|A0A0G2JNQ6|A0A0G2JNQ6_HUMAN	1	1	1	1	1	1	1	1	1	1	1	1	1	1	1	2;1	1;1	1;1	sp|O60231|DHX16_HUMAN Putative pre-mRNA-splicing factor ATP-dependent RNA helicase DHX16 OS=Homo sapiens GN=DHX16 PE=1 SV=2;tr|A0A0G2JNQ6|A0A0G2JNQ6_HUMAN Leukocyte immunoglobulin-like receptor subfamily B member 1 OS=Homo sapiens GN=LILRB1 PE=4 SV=1	2	2	1	1	1	1	1	0	1	1	2	1	1	1	0	0	0	0	0	0	1	0	0	0	0	0	0	0	0
sp|Q9Y265|RUVB1_HUMAN;tr|E7ETR0|E7ETR0_HUMAN;tr|H7C4G5|H7C4G5_HUMAN;tr|J3QLR1|J3QLR1_HUMAN;tr|H7C4I3|H7C4I3_HUMAN	sp|Q9Y265|RUVB1_HUMAN;tr|E7ETR0|E7ETR0_HUMAN	0.911391	1.06991	1.16138	0.967772	0.931133	9244000	7548300	8572700	7555600	7346000	8424900	8076000	9956200	7312100	6840100	13;8;5;3;2	13;8;5;3;2	13;8;5;3;2	sp|Q9Y265|RUVB1_HUMAN RuvB-like 1 OS=Homo sapiens GN=RUVBL1 PE=1 SV=1;tr|E7ETR0|E7ETR0_HUMAN RuvB-like 1 OS=Homo sapiens GN=RUVBL1 PE=1 SV=1	5	13	13	13	9	5	4	6	6	9	4	8	5	8	9	5	4	6	6	9	4	8	5	8	9	5	4	6	6
sp|O00268|TAF4_HUMAN;tr|A0A0G2JRY5|A0A0G2JRY5_HUMAN;tr|V9GY14|V9GY14_HUMAN;tr|V9GY03|V9GY03_HUMAN;sp|Q92750|TAF4B_HUMAN;tr|A0A0A0MSA8|A0A0A0MSA8_HUMAN;tr|H7BY22|H7BY22_HUMAN	sp|O00268|TAF4_HUMAN;tr|A0A0G2JRY5|A0A0G2JRY5_HUMAN	0.868552	1.08268	1.49493	0.781022	1.00812	50225000	49574000	42434000	76405000	65035000	43623000	53673000	63436000	59674000	65563000	32;21;6;3;1;1;1	32;21;6;3;1;1;1	32;21;6;3;1;1;1	sp|O00268|TAF4_HUMAN Transcription initiation factor TFIID subunit 4 OS=Homo sapiens GN=TAF4 PE=1 SV=2;tr|A0A0G2JRY5|A0A0G2JRY5_HUMAN Transcription initiation factor TFIID subunit 4 (Fragment) OS=Homo sapiens GN=TAF4 PE=4 SV=1	7	32	32	32	18	20	19	17	21	14	17	19	12	21	18	20	19	17	21	14	17	19	12	21	18	20	19	17	21
sp|P62314|SMD1_HUMAN;tr|J3QLI9|J3QLI9_HUMAN;tr|J3QLR7|J3QLR7_HUMAN	sp|P62314|SMD1_HUMAN;tr|J3QLI9|J3QLI9_HUMAN	0.994943	0.981852	1.13936	9.90393e-08	1.15976	16610000	22978000	17502000	10097000	10841000	16526000	22561000	19941000	1	12573000	4;2;1	4;2;1	4;2;1	sp|P62314|SMD1_HUMAN Small nuclear ribonucleoprotein Sm D1 OS=Homo sapiens GN=SNRPD1 PE=1 SV=1;tr|J3QLI9|J3QLI9_HUMAN Small nuclear ribonucleoprotein Sm D1 OS=Homo sapiens GN=SNRPD1 PE=1 SV=1	3	4	4	4	4	4	4	3	3	4	4	4	0	3	4	4	4	3	3	4	4	4	0	3	4	4	4	3	3
sp|P62888|RL30_HUMAN;tr|E5RI99|E5RI99_HUMAN;tr|A0A0C4DH44|A0A0C4DH44_HUMAN;tr|A0A0B4J213|A0A0B4J213_HUMAN;tr|E5RJH3|E5RJH3_HUMAN	sp|P62888|RL30_HUMAN;tr|E5RI99|E5RI99_HUMAN;tr|A0A0C4DH44|A0A0C4DH44_HUMAN	0.879689	1.20318	1.02165	0.906483	1.14577	174880000	125010000	176020000	143610000	60546000	153840000	150410000	179830000	130180000	69372000	8;7;4;3;3	8;7;4;3;3	8;7;4;3;3	sp|P62888|RL30_HUMAN 60S ribosomal protein L30 OS=Homo sapiens GN=RPL30 PE=1 SV=2;tr|E5RI99|E5RI99_HUMAN 60S ribosomal protein L30 (Fragment) OS=Homo sapiens GN=RPL30 PE=1 SV=1;tr|A0A0C4DH44|A0A0C4DH44_HUMAN 60S ribosomal protein L30 OS=Homo sapiens GN=RPL	5	8	8	8	7	8	6	7	6	7	7	7	7	6	7	8	6	7	6	7	7	7	7	6	7	8	6	7	6
sp|Q96PK6|RBM14_HUMAN;tr|A0A0A6YYI9|A0A0A6YYI9_HUMAN;tr|F8WDX3|F8WDX3_HUMAN;tr|A0A0A0MSL8|A0A0A0MSL8_HUMAN;tr|B8ZZ74|B8ZZ74_HUMAN	sp|Q96PK6|RBM14_HUMAN	0.880529	1.13862	0.881938	1.10927	1.1617	8724300	4179900	6711700	4374400	5385800	7682000	4759300	5919300	4852400	6256700	14;2;2;2;2	14;2;2;2;2	14;2;2;2;2	sp|Q96PK6|RBM14_HUMAN RNA-binding protein 14 OS=Homo sapiens GN=RBM14 PE=1 SV=2	5	14	14	14	9	7	8	5	8	8	7	6	3	7	9	7	8	5	8	8	7	6	3	7	9	7	8	5	8
tr|F8WAJ0|F8WAJ0_HUMAN;sp|Q9H8H2|DDX31_HUMAN	tr|F8WAJ0|F8WAJ0_HUMAN;sp|Q9H8H2|DDX31_HUMAN	0.990438	0.817514	0.895446	1	1.71059	3838000	5308900	4170100	1	2379700	3801300	4340100	3734100	1	4070700	12;11	12;11	12;11	tr|F8WAJ0|F8WAJ0_HUMAN Probable ATP-dependent RNA helicase DDX31 OS=Homo sapiens GN=DDX31 PE=1 SV=2;sp|Q9H8H2|DDX31_HUMAN Probable ATP-dependent RNA helicase DDX31 OS=Homo sapiens GN=DDX31 PE=2 SV=2	2	12	12	12	6	8	6	1	2	4	5	3	1	5	6	8	6	1	2	4	5	3	1	5	6	8	6	1	2
sp|P06748|NPM_HUMAN;tr|E5RGW4|E5RGW4_HUMAN;tr|E5RI98|E5RI98_HUMAN	sp|P06748|NPM_HUMAN	1.01258	1.06193	0.799948	1.02497	1.24233	69151000	71357000	91811000	44810000	49784000	70021000	75776000	73444000	45929000	61848000	10;1;1	10;1;1	10;1;1	sp|P06748|NPM_HUMAN Nucleophosmin OS=Homo sapiens GN=NPM1 PE=1 SV=2	3	10	10	10	7	7	6	6	6	7	9	7	5	7	7	7	6	6	6	7	9	7	5	7	7	7	6	6	6
sp|Q9BQG0|MBB1A_HUMAN;tr|I3L1L3|I3L1L3_HUMAN;tr|I3L2H8|I3L2H8_HUMAN;tr|I3L311|I3L311_HUMAN	sp|Q9BQG0|MBB1A_HUMAN;tr|I3L1L3|I3L1L3_HUMAN	1.08687	0.956559	1.01009	0.89869	1.02693	138370000	127070000	125820000	106120000	108800000	150390000	121550000	127090000	95369000	111730000	46;43;3;2	46;43;3;2	46;43;3;2	sp|Q9BQG0|MBB1A_HUMAN Myb-binding protein 1A OS=Homo sapiens GN=MYBBP1A PE=1 SV=2;tr|I3L1L3|I3L1L3_HUMAN Myb-binding protein 1A (Fragment) OS=Homo sapiens GN=MYBBP1A PE=1 SV=1	4	46	46	46	35	30	31	20	22	26	30	26	17	24	35	30	31	20	22	26	30	26	17	24	35	30	31	20	22
sp|Q08211|DHX9_HUMAN	sp|Q08211|DHX9_HUMAN	1.0415	0.88802	1.16511	0.874682	1.005	52123000	38105000	35231000	36212000	44606000	54286000	33838000	41048000	31674000	44829000	37	37	37	sp|Q08211|DHX9_HUMAN ATP-dependent RNA helicase A OS=Homo sapiens GN=DHX9 PE=1 SV=4	1	37	37	37	24	23	22	15	27	24	22	22	14	24	24	23	22	15	27	24	22	22	14	24	24	23	22	15	27
sp|Q7Z2T5|TRM1L_HUMAN;tr|X6RK96|X6RK96_HUMAN	sp|Q7Z2T5|TRM1L_HUMAN	0.979241	0.848019	0.697198	1	0.610148	2871000	2837200	3001300	1	2567900	2811400	2406000	2092500	1	1566800	11;2	11;2	11;2	sp|Q7Z2T5|TRM1L_HUMAN TRMT1-like protein OS=Homo sapiens GN=TRMT1L PE=1 SV=2	2	11	11	11	6	4	6	1	3	4	4	3	0	4	6	4	6	1	3	4	4	3	0	4	6	4	6	1	3
sp|P62913|RL11_HUMAN;tr|Q5VVC8|Q5VVC8_HUMAN;tr|Q5VVC9|Q5VVC9_HUMAN	sp|P62913|RL11_HUMAN;tr|Q5VVC8|Q5VVC8_HUMAN;tr|Q5VVC9|Q5VVC9_HUMAN	0.778598	1.17616	0.814947	1.20215	1.17601	266800000	172680000	188270000	155530000	166180000	207730000	203100000	153430000	186970000	195430000	10;8;6	10;8;6	10;8;6	sp|P62913|RL11_HUMAN 60S ribosomal protein L11 OS=Homo sapiens GN=RPL11 PE=1 SV=2;tr|Q5VVC8|Q5VVC8_HUMAN 60S ribosomal protein L11 (Fragment) OS=Homo sapiens GN=RPL11 PE=1 SV=1;tr|Q5VVC9|Q5VVC9_HUMAN 60S ribosomal protein L11 (Fragment) OS=Homo sapiens GN=	3	10	10	10	7	7	7	4	3	8	8	4	5	4	7	7	7	4	3	8	8	4	5	4	7	7	7	4	3
sp|P62316|SMD2_HUMAN;tr|K7ERG4|K7ERG4_HUMAN;tr|K7EJB5|K7EJB5_HUMAN	sp|P62316|SMD2_HUMAN;tr|K7ERG4|K7ERG4_HUMAN	0.937774	0.98583	0.918309	1.03649	1.13992	15299000	16161000	20394000	11510000	14130000	14347000	15932000	18728000	11930000	16107000	6;3;2	6;3;2	6;3;2	sp|P62316|SMD2_HUMAN Small nuclear ribonucleoprotein Sm D2 OS=Homo sapiens GN=SNRPD2 PE=1 SV=1;tr|K7ERG4|K7ERG4_HUMAN Small nuclear ribonucleoprotein Sm D2 OS=Homo sapiens GN=SNRPD2 PE=1 SV=1	3	6	6	6	4	4	3	3	4	5	4	5	4	6	4	4	3	3	4	5	4	5	4	6	4	4	3	3	4
tr|Q5T6W2|Q5T6W2_HUMAN;tr|S4R457|S4R457_HUMAN	tr|Q5T6W2|Q5T6W2_HUMAN	0.906811	1.12535	0.955909	1.09351	0.927268	125230000	117670000	134720000	75262000	107930000	113560000	132420000	128780000	82300000	100080000	25;4	25;4	1;0	tr|Q5T6W2|Q5T6W2_HUMAN Heterogeneous nuclear ribonucleoprotein K (Fragment) OS=Homo sapiens GN=HNRNPK PE=1 SV=1	2	25	25	1	15	15	13	15	16	18	17	15	14	18	15	15	13	15	16	18	17	15	14	18	0	0	0	0	1
sp|P18124|RL7_HUMAN;tr|A8MUD9|A8MUD9_HUMAN;tr|C9JZ88|C9JZ88_HUMAN;tr|C9JIJ5|C9JIJ5_HUMAN	sp|P18124|RL7_HUMAN;tr|A8MUD9|A8MUD9_HUMAN	1.08269	1.10201	0.829424	0.973777	0.949815	811870000	647260000	673130000	839350000	734090000	879000000	713290000	558310000	817340000	697250000	19;15;3;3	19;15;3;3	19;15;3;3	sp|P18124|RL7_HUMAN 60S ribosomal protein L7 OS=Homo sapiens GN=RPL7 PE=1 SV=1;tr|A8MUD9|A8MUD9_HUMAN 60S ribosomal protein L7 OS=Homo sapiens GN=RPL7 PE=1 SV=1	4	19	19	19	13	15	13	14	11	13	11	12	15	11	13	15	13	14	11	13	11	12	15	11	13	15	13	14	11
sp|Q8NEY8|PPHLN_HUMAN;tr|F8W6A0|F8W6A0_HUMAN;tr|F8WF16|F8WF16_HUMAN;tr|B7Z8L1|B7Z8L1_HUMAN;tr|F8VPY7|F8VPY7_HUMAN;tr|F8VWU8|F8VWU8_HUMAN;tr|F8VRK2|F8VRK2_HUMAN	sp|Q8NEY8|PPHLN_HUMAN;tr|F8W6A0|F8W6A0_HUMAN;tr|F8WF16|F8WF16_HUMAN;tr|B7Z8L1|B7Z8L1_HUMAN	0.964972	0.956958	1.30136	2.82127e-07	0.806739	2281000	3347900	2579300	3544500	3439900	2201100	3203800	3356600	1	2775100	8;6;5;5;3;3;2	8;6;5;5;3;3;2	1;1;0;0;0;0;0	sp|Q8NEY8|PPHLN_HUMAN Periphilin-1 OS=Homo sapiens GN=PPHLN1 PE=1 SV=2;tr|F8W6A0|F8W6A0_HUMAN Periphilin-1 OS=Homo sapiens GN=PPHLN1 PE=1 SV=1;tr|F8WF16|F8WF16_HUMAN Periphilin-1 OS=Homo sapiens GN=PPHLN1 PE=1 SV=1;tr|B7Z8L1|B7Z8L1_HUMAN Periphilin-1 OS=Ho	7	8	8	1	4	5	5	2	3	5	4	3	1	4	4	5	5	2	3	5	4	3	1	4	0	0	1	0	0
sp|Q9NXF1|TEX10_HUMAN;tr|A0A0A0MSR3|A0A0A0MSR3_HUMAN	sp|Q9NXF1|TEX10_HUMAN	0.962122	0.956389	0.822818	0.363037	1.40277	25265000	20935000	29354000	14915000	17355000	24308000	20022000	24153000	5414700	24345000	27;7	27;7	27;7	sp|Q9NXF1|TEX10_HUMAN Testis-expressed sequence 10 protein OS=Homo sapiens GN=TEX10 PE=1 SV=2	2	27	27	27	17	17	15	7	13	14	15	14	4	18	17	17	15	7	13	14	15	14	4	18	17	17	15	7	13
tr|Q5QPL9|Q5QPL9_HUMAN;sp|Q9UKM9|RALY_HUMAN;tr|Q5QPM1|Q5QPM1_HUMAN;tr|Q5QPM2|Q5QPM2_HUMAN;tr|Q5QPM0|Q5QPM0_HUMAN	tr|Q5QPL9|Q5QPL9_HUMAN;sp|Q9UKM9|RALY_HUMAN;tr|Q5QPM1|Q5QPM1_HUMAN;tr|Q5QPM2|Q5QPM2_HUMAN;tr|Q5QPM0|Q5QPM0_HUMAN	0.968125	0.941583	1.05449	0.865562	1.09116	10014000	13010000	11984000	7991800	8744400	9694800	12250000	12637000	6917400	9541500	9;9;6;5;5	9;9;6;5;5	9;9;6;5;5	tr|Q5QPL9|Q5QPL9_HUMAN RNA-binding protein Raly (Fragment) OS=Homo sapiens GN=RALY PE=1 SV=1;sp|Q9UKM9|RALY_HUMAN RNA-binding protein Raly OS=Homo sapiens GN=RALY PE=1 SV=1;tr|Q5QPM1|Q5QPM1_HUMAN RNA-binding protein Raly (Fragment) OS=Homo sapiens GN=RALY	5	9	9	9	4	6	7	5	3	6	6	5	4	5	4	6	7	5	3	6	6	5	4	5	4	6	7	5	3
tr|F1T0B3|F1T0B3_HUMAN;tr|A0A087X2G1|A0A087X2G1_HUMAN;sp|Q92499|DDX1_HUMAN	tr|F1T0B3|F1T0B3_HUMAN;tr|A0A087X2G1|A0A087X2G1_HUMAN;sp|Q92499|DDX1_HUMAN	0.953739	1.35064	1.18952	1	0.9854	3726700	4086800	3974300	1	3445200	3554300	5519800	4727500	1	3394900	12;12;12	12;12;12	12;12;12	tr|F1T0B3|F1T0B3_HUMAN ATP-dependent RNA helicase DDX1 OS=Homo sapiens GN=DDX1 PE=1 SV=1;tr|A0A087X2G1|A0A087X2G1_HUMAN ATP-dependent RNA helicase DDX1 OS=Homo sapiens GN=DDX1 PE=1 SV=1;sp|Q92499|DDX1_HUMAN ATP-dependent RNA helicase DDX1 OS=Homo sapiens G	3	12	12	12	4	6	7	0	4	4	7	4	0	5	4	6	7	0	4	4	7	4	0	5	4	6	7	0	4
sp|Q8IWX8|CHERP_HUMAN;tr|J3QK89|J3QK89_HUMAN	sp|Q8IWX8|CHERP_HUMAN;tr|J3QK89|J3QK89_HUMAN	0.952572	0.672554	1.00765	1	0.647245	3173200	3844300	2719800	1	3228300	3022700	2585500	2740600	1	2089500	7;7	7;7	7;7	sp|Q8IWX8|CHERP_HUMAN Calcium homeostasis endoplasmic reticulum protein OS=Homo sapiens GN=CHERP PE=1 SV=3;tr|J3QK89|J3QK89_HUMAN Calcium homeostasis endoplasmic reticulum protein OS=Homo sapiens GN=CHERP PE=1 SV=1	2	7	7	7	4	6	3	0	3	2	4	4	1	2	4	6	3	0	3	2	4	4	1	2	4	6	3	0	3
sp|O75131|CPNE3_HUMAN;tr|A0A087WYQ3|A0A087WYQ3_HUMAN;tr|E5RHZ0|E5RHZ0_HUMAN;tr|A0A087WUS8|A0A087WUS8_HUMAN;tr|A0A087WXR6|A0A087WXR6_HUMAN;tr|H0YB26|H0YB26_HUMAN;sp|Q96FN4|CPNE2_HUMAN;sp|Q96A23|CPNE4_HUMAN;sp|O95741|CPNE6_HUMAN;sp|Q9UBL6|CPNE7_HUMAN	sp|O75131|CPNE3_HUMAN;tr|A0A087WYQ3|A0A087WYQ3_HUMAN	0.949281	0.771464	3.97251e-07	1	1	3748100	4067200	2517300	1	1	3558000	3137700	1	1	1	6;3;2;1;1;1;1;1;1;1	6;3;2;1;1;1;1;1;1;1	5;3;2;1;1;1;0;0;0;0	sp|O75131|CPNE3_HUMAN Copine-3 OS=Homo sapiens GN=CPNE3 PE=1 SV=1;tr|A0A087WYQ3|A0A087WYQ3_HUMAN Copine-3 (Fragment) OS=Homo sapiens GN=CPNE3 PE=1 SV=1	10	6	6	5	4	3	3	1	1	4	3	1	0	1	4	3	3	1	1	4	3	1	0	1	3	2	2	0	1
sp|P62910|RL32_HUMAN;tr|F8W727|F8W727_HUMAN;tr|D3YTB1|D3YTB1_HUMAN;tr|D3YTI8|D3YTI8_HUMAN	sp|P62910|RL32_HUMAN;tr|F8W727|F8W727_HUMAN;tr|D3YTB1|D3YTB1_HUMAN	0.948445	1.16393	0.667803	0.880347	0.983722	198040000	128960000	199400000	168070000	112420000	187830000	150100000	133160000	147960000	110590000	15;15;14;2	15;15;14;2	15;15;14;2	sp|P62910|RL32_HUMAN 60S ribosomal protein L32 OS=Homo sapiens GN=RPL32 PE=1 SV=2;tr|F8W727|F8W727_HUMAN 60S ribosomal protein L32 OS=Homo sapiens GN=RPL32 PE=1 SV=1;tr|D3YTB1|D3YTB1_HUMAN 60S ribosomal protein L32 (Fragment) OS=Homo sapiens GN=RPL32 PE=1	4	15	15	15	11	12	11	10	11	13	12	12	11	10	11	12	11	10	11	13	12	12	11	10	11	12	11	10	11
sp|P46781|RS9_HUMAN;tr|B5MCT8|B5MCT8_HUMAN;tr|C9JM19|C9JM19_HUMAN;tr|F2Z3C0|F2Z3C0_HUMAN;tr|A8MXK4|A8MXK4_HUMAN	sp|P46781|RS9_HUMAN;tr|B5MCT8|B5MCT8_HUMAN;tr|C9JM19|C9JM19_HUMAN	0.947184	0.98199	0.683834	1.04975	0.888758	131020000	139920000	145180000	84355000	118840000	124100000	137400000	99279000	88552000	105620000	14;11;11;5;5	14;11;11;5;5	14;11;11;5;5	sp|P46781|RS9_HUMAN 40S ribosomal protein S9 OS=Homo sapiens GN=RPS9 PE=1 SV=3;tr|B5MCT8|B5MCT8_HUMAN 40S ribosomal protein S9 OS=Homo sapiens GN=RPS9 PE=1 SV=1;tr|C9JM19|C9JM19_HUMAN 40S ribosomal protein S9 OS=Homo sapiens GN=RPS9 PE=1 SV=1	5	14	14	14	11	7	9	8	8	11	9	7	9	10	11	7	9	8	8	11	9	7	9	10	11	7	9	8	8
tr|B1ANR0|B1ANR0_HUMAN;sp|Q13310|PABP4_HUMAN;tr|H0Y5F5|H0Y5F5_HUMAN;tr|H0YEU6|H0YEU6_HUMAN;tr|H0YCC8|H0YCC8_HUMAN;tr|H0YEQ8|H0YEQ8_HUMAN;tr|B1ANR1|B1ANR1_HUMAN;tr|H0Y6X6|H0Y6X6_HUMAN;tr|H0YER0|H0YER0_HUMAN;sp|P0CB38|PAB4L_HUMAN	tr|B1ANR0|B1ANR0_HUMAN;sp|Q13310|PABP4_HUMAN;tr|H0Y5F5|H0Y5F5_HUMAN	0.971736	1.13384	1.00028	1.00666	0.863311	25651000	19045000	17561000	19381000	25130000	24926000	21594000	17566000	19510000	21695000	27;27;23;11;8;5;5;3;2;2	16;16;15;8;4;1;1;3;2;2	16;16;15;8;4;1;1;3;2;2	tr|B1ANR0|B1ANR0_HUMAN Polyadenylate-binding protein OS=Homo sapiens GN=PABPC4 PE=1 SV=1;sp|Q13310|PABP4_HUMAN Polyadenylate-binding protein 4 OS=Homo sapiens GN=PABPC4 PE=1 SV=1;tr|H0Y5F5|H0Y5F5_HUMAN Polyadenylate-binding protein (Fragment) OS=Homo sapie	10	27	16	16	20	17	15	11	16	18	15	17	12	16	11	9	7	5	9	10	9	8	6	10	11	9	7	5	9
sp|Q5SY16|NOL9_HUMAN	sp|Q5SY16|NOL9_HUMAN	1.27396	0.7703	1.03311	0.993344	0.925206	11060000	12845000	8426700	7557500	15028000	14090000	9894500	8705700	7507200	13904000	11	11	11	sp|Q5SY16|NOL9_HUMAN Polynucleotide 5-hydroxyl-kinase NOL9 OS=Homo sapiens GN=NOL9 PE=1 SV=1	1	11	11	11	8	8	6	3	6	8	9	4	3	8	8	8	6	3	6	8	9	4	3	8	8	8	6	3	6
sp|Q9NW64|RBM22_HUMAN;tr|E5RJW4|E5RJW4_HUMAN	sp|Q9NW64|RBM22_HUMAN	0.937237	0.936946	0.891274	1	1	1827500	1535200	2035400	1	1	1712800	1438400	1814100	1	1	4;1	4;1	4;1	sp|Q9NW64|RBM22_HUMAN Pre-mRNA-splicing factor RBM22 OS=Homo sapiens GN=RBM22 PE=1 SV=1	2	4	4	4	3	3	2	1	2	2	3	2	0	1	3	3	2	1	2	2	3	2	0	1	3	3	2	1	2
sp|Q9UMS4|PRP19_HUMAN;tr|F5GY56|F5GY56_HUMAN;tr|H0YGF3|H0YGF3_HUMAN;tr|F5H2I0|F5H2I0_HUMAN;tr|H0YGZ5|H0YGZ5_HUMAN	sp|Q9UMS4|PRP19_HUMAN	1.04052	0.89583	0.971028	0.908922	1.11199	19399000	24604000	22159000	19423000	22752000	20185000	22041000	21517000	17654000	25300000	12;5;2;1;1	12;5;2;1;1	12;5;2;1;1	sp|Q9UMS4|PRP19_HUMAN Pre-mRNA-processing factor 19 OS=Homo sapiens GN=PRPF19 PE=1 SV=1	5	12	12	12	8	7	9	7	7	8	9	10	7	9	8	7	9	7	7	8	9	10	7	9	8	7	9	7	7
sp|Q9H2U1|DHX36_HUMAN;tr|E7EWK3|E7EWK3_HUMAN;tr|A0A0G2JQU7|A0A0G2JQU7_HUMAN;tr|A0A0G2JRP3|A0A0G2JRP3_HUMAN;tr|H7C514|H7C514_HUMAN;tr|H7C5F5|H7C5F5_HUMAN	sp|Q9H2U1|DHX36_HUMAN;tr|E7EWK3|E7EWK3_HUMAN	1.14219	1.04364	1.19265	0.711528	0.886031	4570600	4711500	4047200	4785900	5509400	5220500	4917100	4826900	3405300	4881500	15;12;4;2;2;2	15;12;4;2;2;2	15;12;4;2;2;2	sp|Q9H2U1|DHX36_HUMAN ATP-dependent RNA helicase DHX36 OS=Homo sapiens GN=DHX36 PE=1 SV=2;tr|E7EWK3|E7EWK3_HUMAN ATP-dependent RNA helicase DHX36 (Fragment) OS=Homo sapiens GN=DHX36 PE=1 SV=1	6	15	15	15	6	6	7	4	8	7	5	7	2	6	6	6	7	4	8	7	5	7	2	6	6	6	7	4	8
sp|P39023|RL3_HUMAN;tr|G5E9G0|G5E9G0_HUMAN;tr|H7C422|H7C422_HUMAN;tr|H7C3M2|H7C3M2_HUMAN;tr|B5MCW2|B5MCW2_HUMAN;tr|F8WCR1|F8WCR1_HUMAN;sp|Q92901|RL3L_HUMAN	sp|P39023|RL3_HUMAN;tr|G5E9G0|G5E9G0_HUMAN;tr|H7C422|H7C422_HUMAN;tr|H7C3M2|H7C3M2_HUMAN;tr|B5MCW2|B5MCW2_HUMAN	0.991885	1.07111	1.08236	0.904861	0.879111	645710000	458430000	500130000	576000000	493840000	640470000	491030000	541320000	521200000	434140000	24;19;16;14;13;7;2	24;19;16;14;13;7;2	24;19;16;14;13;7;2	sp|P39023|RL3_HUMAN 60S ribosomal protein L3 OS=Homo sapiens GN=RPL3 PE=1 SV=2;tr|G5E9G0|G5E9G0_HUMAN 60S ribosomal protein L3 OS=Homo sapiens GN=RPL3 PE=1 SV=1;tr|H7C422|H7C422_HUMAN 60S ribosomal protein L3 (Fragment) OS=Homo sapiens GN=RPL3 PE=1 SV=1;tr	7	24	24	24	22	18	19	20	20	20	18	18	18	20	22	18	19	20	20	20	18	18	18	20	22	18	19	20	20
sp|O14654|IRS4_HUMAN	sp|O14654|IRS4_HUMAN	0.928486	0.964883	1	1	0.74755	1932500	1506400	1	1	2438900	1794300	1453500	1	1	1823200	11	11	11	sp|O14654|IRS4_HUMAN Insulin receptor substrate 4 OS=Homo sapiens GN=IRS4 PE=1 SV=1	1	11	11	11	4	3	2	0	4	6	3	1	0	5	4	3	2	0	4	6	3	1	0	5	4	3	2	0	4
sp|Q9Y3I0|RTCB_HUMAN	sp|Q9Y3I0|RTCB_HUMAN	0.928317	0.969571	0.868954	1	1.03455	4154400	3841700	4322900	1	2850700	3856600	3724800	3756400	1	2949200	12	12	12	sp|Q9Y3I0|RTCB_HUMAN tRNA-splicing ligase RtcB homolog OS=Homo sapiens GN=RTCB PE=1 SV=1	1	12	12	12	8	7	9	0	3	6	5	5	0	5	8	7	9	0	3	6	5	5	0	5	8	7	9	0	3
sp|P50402|EMD_HUMAN;tr|Q5HY57|Q5HY57_HUMAN;tr|F8WEQ1|F8WEQ1_HUMAN	sp|P50402|EMD_HUMAN;tr|Q5HY57|Q5HY57_HUMAN	1.19397	1.11738	0.760105	0.831047	0.892687	10548000	16034000	14102000	6385800	6514600	12594000	17916000	10719000	5306900	5815500	12;7;1	12;7;1	12;7;1	sp|P50402|EMD_HUMAN Emerin OS=Homo sapiens GN=EMD PE=1 SV=1;tr|Q5HY57|Q5HY57_HUMAN Emerin OS=Homo sapiens GN=EMD PE=1 SV=1	3	12	12	12	7	8	8	3	5	9	9	7	2	5	7	8	8	3	5	9	9	7	2	5	7	8	8	3	5
sp|P30050|RL12_HUMAN	sp|P30050|RL12_HUMAN	1.06607	1.3424	0.937346	0.931143	0.761683	250780000	216210000	243880000	319650000	373410000	267350000	290240000	228600000	297640000	284420000	6	6	6	sp|P30050|RL12_HUMAN 60S ribosomal protein L12 OS=Homo sapiens GN=RPL12 PE=1 SV=1	1	6	6	6	5	5	6	5	5	4	5	5	4	4	5	5	6	5	5	4	5	5	4	4	5	5	6	5	5
sp|P61353|RL27_HUMAN;tr|K7ELC7|K7ELC7_HUMAN;tr|K7EQQ9|K7EQQ9_HUMAN;tr|K7ERY7|K7ERY7_HUMAN	sp|P61353|RL27_HUMAN;tr|K7ELC7|K7ELC7_HUMAN;tr|K7EQQ9|K7EQQ9_HUMAN	1.1751	0.972971	0.874023	0.986234	0.861335	405660000	405120000	414680000	457660000	438250000	476690000	394170000	362440000	451360000	377480000	11;10;6;1	11;10;6;1	11;10;6;1	sp|P61353|RL27_HUMAN 60S ribosomal protein L27 OS=Homo sapiens GN=RPL27 PE=1 SV=2;tr|K7ELC7|K7ELC7_HUMAN 60S ribosomal protein L27 (Fragment) OS=Homo sapiens GN=RPL27 PE=1 SV=1;tr|K7EQQ9|K7EQQ9_HUMAN 60S ribosomal protein L27 OS=Homo sapiens GN=RPL27 PE=1	4	11	11	11	8	7	6	8	9	10	7	7	7	9	8	7	6	8	9	10	7	7	7	9	8	7	6	8	9
tr|J3KT86|J3KT86_HUMAN;sp|Q96GD4|AURKB_HUMAN;tr|J3QLN8|J3QLN8_HUMAN;tr|J3QR41|J3QR41_HUMAN;tr|J3KTD6|J3KTD6_HUMAN;tr|J3KRJ2|J3KRJ2_HUMAN;tr|B4DXA6|B4DXA6_HUMAN;tr|A3KFJ1|A3KFJ1_HUMAN;tr|Q5QPD4|Q5QPD4_HUMAN;tr|A0A0A0MSY3|A0A0A0MSY3_HUMAN;tr|Q5Y191|Q5Y191_HUMAN;sp|Q9UQB9|AURKC_HUMAN;tr|A3KFJ0|A3KFJ0_HUMAN;sp|O14965|AURKA_HUMAN	tr|J3KT86|J3KT86_HUMAN;sp|Q96GD4|AURKB_HUMAN;tr|J3QLN8|J3QLN8_HUMAN;tr|J3QR41|J3QR41_HUMAN;tr|J3KTD6|J3KTD6_HUMAN	0.924577	1.22184	1.05869	1	1.1831	2004700	1233300	1375100	1	1627500	1853500	1506900	1455800	1	1925500	6;6;5;4;4;1;1;1;1;1;1;1;1;1	6;6;5;4;4;1;1;1;1;1;1;1;1;1	6;6;5;4;4;1;1;1;1;1;1;1;1;1	tr|J3KT86|J3KT86_HUMAN Aurora kinase B (Fragment) OS=Homo sapiens GN=AURKB PE=1 SV=1;sp|Q96GD4|AURKB_HUMAN Aurora kinase B OS=Homo sapiens GN=AURKB PE=1 SV=3;tr|J3QLN8|J3QLN8_HUMAN Aurora kinase B (Fragment) OS=Homo sapiens GN=AURKB PE=1 SV=5;tr|J3QR41|J3Q	14	6	6	6	4	2	3	0	3	2	2	3	1	4	4	2	3	0	3	2	2	3	1	4	4	2	3	0	3
sp|Q15024|EXOS7_HUMAN	sp|Q15024|EXOS7_HUMAN	0.92406	0.638835	1.02744	0.969888	1.26576	7004200	9672600	7240400	5104300	4326900	6472300	6179200	7439100	4950600	5476800	6	6	6	sp|Q15024|EXOS7_HUMAN Exosome complex component RRP42 OS=Homo sapiens GN=EXOSC7 PE=1 SV=3	1	6	6	6	3	3	5	3	3	3	5	5	3	4	3	3	5	3	3	3	5	5	3	4	3	3	5	3	3
tr|D6R9P3|D6R9P3_HUMAN;tr|D6RD18|D6RD18_HUMAN;tr|D6RBZ0|D6RBZ0_HUMAN;tr|A0A087WZV1|A0A087WZV1_HUMAN;sp|Q99729|ROAA_HUMAN	tr|D6R9P3|D6R9P3_HUMAN;tr|D6RD18|D6RD18_HUMAN;tr|D6RBZ0|D6RBZ0_HUMAN;tr|A0A087WZV1|A0A087WZV1_HUMAN;sp|Q99729|ROAA_HUMAN	0.923511	1412100	1.81742	1	1407500	1770200	1	1064200	1	1	1634800	1412100	1934100	1	1407500	4;4;4;4;3	4;4;4;4;3	4;4;4;4;3	tr|D6R9P3|D6R9P3_HUMAN Heterogeneous nuclear ribonucleoprotein A/B OS=Homo sapiens GN=HNRNPAB PE=1 SV=1;tr|D6RD18|D6RD18_HUMAN Heterogeneous nuclear ribonucleoprotein A/B OS=Homo sapiens GN=HNRNPAB PE=1 SV=1;tr|D6RBZ0|D6RBZ0_HUMAN Heterogeneous nuclear rib	5	4	4	4	3	1	2	0	1	2	2	3	0	3	3	1	2	0	1	2	2	3	0	3	3	1	2	0	1
sp|P26373|RL13_HUMAN;tr|J3QSB4|J3QSB4_HUMAN;tr|H3BTH3|H3BTH3_HUMAN;tr|J3KS98|J3KS98_HUMAN;tr|H3BUK8|H3BUK8_HUMAN	sp|P26373|RL13_HUMAN;tr|J3QSB4|J3QSB4_HUMAN	0.895582	1.099	0.794319	0.941848	1.16199	360570000	264760000	386910000	220630000	290260000	322920000	290970000	307330000	207800000	337280000	15;8;3;3;1	15;8;3;3;1	15;8;3;3;1	sp|P26373|RL13_HUMAN 60S ribosomal protein L13 OS=Homo sapiens GN=RPL13 PE=1 SV=4;tr|J3QSB4|J3QSB4_HUMAN 60S ribosomal protein L13 (Fragment) OS=Homo sapiens GN=RPL13 PE=1 SV=1	5	15	15	15	10	7	9	9	8	13	9	9	9	9	10	7	9	9	8	13	9	9	9	9	10	7	9	9	8
tr|G8JLB6|G8JLB6_HUMAN;sp|P31943|HNRH1_HUMAN;tr|E9PCY7|E9PCY7_HUMAN;tr|D6RBM0|D6RBM0_HUMAN;tr|H0YB39|H0YB39_HUMAN;tr|E7EN40|E7EN40_HUMAN;tr|D6RIT2|D6RIT2_HUMAN;tr|D6RIU0|D6RIU0_HUMAN;tr|H0YBD7|H0YBD7_HUMAN;tr|D6R9T0|D6R9T0_HUMAN;tr|D6RFM3|D6RFM3_HUMAN;tr|D6RDU3|D6RDU3_HUMAN;tr|D6RJ04|D6RJ04_HUMAN;tr|D6RIH9|D6RIH9_HUMAN;tr|D6RAM1|D6RAM1_HUMAN;tr|E7EQJ0|E7EQJ0_HUMAN;tr|E5RGV0|E5RGV0_HUMAN;tr|D6RDL0…	tr|G8JLB6|G8JLB6_HUMAN;sp|P31943|HNRH1_HUMAN;tr|E9PCY7|E9PCY7_HUMAN;tr|D6RBM0|D6RBM0_HUMAN;tr|H0YB39|H0YB39_HUMAN;tr|E7EN40|E7EN40_HUMAN	0.954389	0.754999	1.22379	0.93164	1.01559	145580000	168040000	121720000	109860000	132130000	138940000	126870000	148960000	102350000	134190000	21;21;20;13;12;11;10;10;10;9;9;9;9;9;9;9;8;7;6;4;3;3;3;2;1	21;21;20;13;12;11;10;10;10;9;9;9;9;9;9;9;8;7;6;4;3;3;3;2;1	11;11;10;7;4;6;8;7;3;7;7;7;7;7;7;7;4;6;2;4;3;1;1;2;0	tr|G8JLB6|G8JLB6_HUMAN Heterogeneous nuclear ribonucleoprotein H OS=Homo sapiens GN=HNRNPH1 PE=1 SV=1;sp|P31943|HNRH1_HUMAN Heterogeneous nuclear ribonucleoprotein H OS=Homo sapiens GN=HNRNPH1 PE=1 SV=4;tr|E9PCY7|E9PCY7_HUMAN Heterogeneous nuclear ribonucl	25	21	21	11	17	14	15	11	13	16	17	16	12	12	17	14	15	11	13	16	17	16	12	12	9	8	8	6	8
sp|Q6P3W7|SCYL2_HUMAN;tr|F8VSC5|F8VSC5_HUMAN;tr|H0YIK6|H0YIK6_HUMAN	sp|Q6P3W7|SCYL2_HUMAN;tr|F8VSC5|F8VSC5_HUMAN	0.922404	1.30059	1.26866	4.36186e-07	1.1487	2228200	2359000	1971300	2292600	2229300	2055300	3068100	2500900	1	2560800	5;5;1	5;5;1	5;5;1	sp|Q6P3W7|SCYL2_HUMAN SCY1-like protein 2 OS=Homo sapiens GN=SCYL2 PE=1 SV=1;tr|F8VSC5|F8VSC5_HUMAN SCY1-like protein 2 (Fragment) OS=Homo sapiens GN=SCYL2 PE=1 SV=1	3	5	5	5	4	2	4	2	4	3	5	5	0	4	4	2	4	2	4	3	5	5	0	4	4	2	4	2	4
sp|Q13595|TRA2A_HUMAN;tr|F8WEH2|F8WEH2_HUMAN	sp|Q13595|TRA2A_HUMAN	1.16192	1.00185	0.842609	0.783652	0.971439	6866900	8310100	7949000	5660800	7538200	7978800	8325500	6697900	4436100	7322900	8;1	6;1	6;1	sp|Q13595|TRA2A_HUMAN Transformer-2 protein homolog alpha OS=Homo sapiens GN=TRA2A PE=1 SV=1	2	8	6	6	5	5	5	2	5	6	4	3	2	5	5	4	5	2	4	6	3	3	2	5	5	4	5	2	4
sp|O75643|U520_HUMAN;tr|B4E0P5|B4E0P5_HUMAN	sp|O75643|U520_HUMAN	0.920969	0.961467	1.02793	0.930014	0.955201	33759000	29455000	26064000	31349000	39220000	31091000	28320000	26792000	29155000	37463000	62;14	62;14	62;14	sp|O75643|U520_HUMAN U5 small nuclear ribonucleoprotein 200 kDa helicase OS=Homo sapiens GN=SNRNP200 PE=1 SV=2	2	62	62	62	30	26	31	14	31	31	27	24	13	32	30	26	31	14	31	31	27	24	13	32	30	26	31	14	31
tr|H3BRU6|H3BRU6_HUMAN;tr|F8VZX2|F8VZX2_HUMAN;sp|Q15366|PCBP2_HUMAN;tr|F8VXH9|F8VXH9_HUMAN;tr|F8W0G4|F8W0G4_HUMAN;tr|F8W1G6|F8W1G6_HUMAN;tr|J3QT27|J3QT27_HUMAN;sp|P57721|PCBP3_HUMAN;tr|F8VRH0|F8VRH0_HUMAN;tr|E9PFP8|E9PFP8_HUMAN;tr|H3BND9|H3BND9_HUMAN;tr|H3BSS4|H3BSS4_HUMAN	tr|H3BRU6|H3BRU6_HUMAN;tr|F8VZX2|F8VZX2_HUMAN;sp|Q15366|PCBP2_HUMAN;tr|F8VXH9|F8VXH9_HUMAN;tr|F8W0G4|F8W0G4_HUMAN	0.918663	1.17686	1.66397	2.846e-07	0.999445	4658400	4161500	2805400	3513700	4140500	4279500	4897500	4668100	1	4138200	5;5;5;4;3;2;2;2;2;2;1;1	5;5;5;4;3;2;2;2;2;2;1;1	4;4;4;3;2;2;1;1;2;1;1;1	tr|H3BRU6|H3BRU6_HUMAN Poly(rC)-binding protein 2 (Fragment) OS=Homo sapiens GN=PCBP2 PE=1 SV=1;tr|F8VZX2|F8VZX2_HUMAN Poly(rC)-binding protein 2 OS=Homo sapiens GN=PCBP2 PE=1 SV=1;sp|Q15366|PCBP2_HUMAN Poly(rC)-binding protein 2 OS=Homo sapiens GN=PCBP2 P	12	5	5	4	4	2	2	2	2	3	3	3	1	3	4	2	2	2	2	3	3	3	1	3	3	1	1	1	1
sp|P46779|RL28_HUMAN;tr|H0YKD8|H0YKD8_HUMAN;tr|H0YMF4|H0YMF4_HUMAN;tr|H0YLP6|H0YLP6_HUMAN	sp|P46779|RL28_HUMAN;tr|H0YKD8|H0YKD8_HUMAN;tr|H0YMF4|H0YMF4_HUMAN;tr|H0YLP6|H0YLP6_HUMAN	0.918266	1.31216	0.838861	0.640443	0.722897	296570000	167030000	270760000	274560000	233740000	272330000	219170000	227130000	175840000	168970000	10;9;8;7	10;9;8;7	10;9;8;7	sp|P46779|RL28_HUMAN 60S ribosomal protein L28 OS=Homo sapiens GN=RPL28 PE=1 SV=3;tr|H0YKD8|H0YKD8_HUMAN 60S ribosomal protein L28 OS=Homo sapiens GN=RPL28 PE=1 SV=1;tr|H0YMF4|H0YMF4_HUMAN 60S ribosomal protein L28 OS=Homo sapiens GN=RPL28 PE=1 SV=1;tr|H0Y	4	10	10	10	6	5	4	6	4	9	6	6	6	6	6	5	4	6	4	9	6	6	6	6	6	5	4	6	4
sp|Q8IWI9|MGAP_HUMAN;tr|H3BP52|H3BP52_HUMAN;tr|H3BTF4|H3BTF4_HUMAN	sp|Q8IWI9|MGAP_HUMAN	1.03638	0.873171	1.16329	0.865893	0.918073	14458000	20642000	14269000	21192000	16295000	14984000	18024000	16599000	18350000	14960000	29;1;1	29;1;1	14;1;1	sp|Q8IWI9|MGAP_HUMAN MAX gene-associated protein OS=Homo sapiens GN=MGA PE=1 SV=3	3	29	29	14	14	16	15	13	14	13	18	16	10	17	14	16	15	13	14	13	18	16	10	17	8	7	9	7	8
sp|P05387|RLA2_HUMAN;tr|H0YDD8|H0YDD8_HUMAN	sp|P05387|RLA2_HUMAN;tr|H0YDD8|H0YDD8_HUMAN	1.08665	1.05381	0.918065	0.764438	0.982191	530780000	635050000	480990000	725670000	576110000	576770000	669220000	441580000	554730000	565850000	10;5	10;5	9;4	sp|P05387|RLA2_HUMAN 60S acidic ribosomal protein P2 OS=Homo sapiens GN=RPLP2 PE=1 SV=1;tr|H0YDD8|H0YDD8_HUMAN 60S acidic ribosomal protein P2 (Fragment) OS=Homo sapiens GN=RPLP2 PE=1 SV=1	2	10	10	9	9	9	10	9	10	9	8	9	7	10	9	9	10	9	10	9	8	9	7	10	8	8	9	8	9
sp|P40429|RL13A_HUMAN;tr|M0QYS1|M0QYS1_HUMAN;tr|Q8J015|Q8J015_HUMAN;sp|Q6NVV1|R13P3_HUMAN;tr|M0QZU1|M0QZU1_HUMAN	sp|P40429|RL13A_HUMAN;tr|M0QYS1|M0QYS1_HUMAN;tr|Q8J015|Q8J015_HUMAN	0.863095	1.13144	0.701846	1.15725	0.942018	299770000	184040000	230720000	252080000	185920000	258730000	208230000	161930000	291720000	175140000	12;11;9;5;2	12;11;9;5;2	10;10;9;5;0	sp|P40429|RL13A_HUMAN 60S ribosomal protein L13a OS=Homo sapiens GN=RPL13A PE=1 SV=2;tr|M0QYS1|M0QYS1_HUMAN 60S ribosomal protein L13a (Fragment) OS=Homo sapiens GN=RPL13A PE=1 SV=2;tr|Q8J015|Q8J015_HUMAN 60S ribosomal protein L13a OS=Homo sapiens GN=RPL13	5	12	12	10	11	8	8	8	8	8	9	7	5	7	11	8	8	8	8	8	9	7	5	7	9	7	7	7	7
sp|Q8NEJ9|NGDN_HUMAN;tr|H0YJ17|H0YJ17_HUMAN;tr|G3V4G1|G3V4G1_HUMAN	sp|Q8NEJ9|NGDN_HUMAN;tr|H0YJ17|H0YJ17_HUMAN	0.910197	2060400	0.512168	1	1.5452	2925300	1	3611900	1	2516500	2662600	2060400	1849900	1	3888500	6;4;2	6;4;2	6;4;2	sp|Q8NEJ9|NGDN_HUMAN Neuroguidin OS=Homo sapiens GN=NGDN PE=1 SV=1;tr|H0YJ17|H0YJ17_HUMAN Neuroguidin (Fragment) OS=Homo sapiens GN=NGDN PE=1 SV=1	3	6	6	6	4	0	2	1	2	3	2	3	1	3	4	0	2	1	2	3	2	3	1	3	4	0	2	1	2
sp|P62917|RL8_HUMAN;tr|E9PKZ0|E9PKZ0_HUMAN;tr|G3V1A1|G3V1A1_HUMAN;tr|E9PKU4|E9PKU4_HUMAN;tr|E9PP36|E9PP36_HUMAN	sp|P62917|RL8_HUMAN;tr|E9PKZ0|E9PKZ0_HUMAN;tr|G3V1A1|G3V1A1_HUMAN;tr|E9PKU4|E9PKU4_HUMAN	0.84325	1.35299	0.72191	1.06307	0.892142	407720000	309950000	457010000	389390000	371970000	343810000	419360000	329920000	413950000	331850000	14;12;11;10;4	14;12;11;10;4	14;12;11;10;4	sp|P62917|RL8_HUMAN 60S ribosomal protein L8 OS=Homo sapiens GN=RPL8 PE=1 SV=2;tr|E9PKZ0|E9PKZ0_HUMAN 60S ribosomal protein L8 (Fragment) OS=Homo sapiens GN=RPL8 PE=1 SV=1;tr|G3V1A1|G3V1A1_HUMAN 60S ribosomal protein L8 OS=Homo sapiens GN=RPL8 PE=1 SV=1;tr	5	14	14	14	8	7	9	7	7	6	11	6	6	10	8	7	9	7	7	6	11	6	6	10	8	7	9	7	7
sp|Q9Y2P8|RCL1_HUMAN;tr|Q5VYW8|Q5VYW8_HUMAN;tr|Q5VZU3|Q5VZU3_HUMAN;tr|A0A087X1L9|A0A087X1L9_HUMAN;tr|Q5VZU2|Q5VZU2_HUMAN	sp|Q9Y2P8|RCL1_HUMAN	0.991704	0.967462	0.827856	0.794437	1.21663	14223000	15121000	15975000	10678000	10114000	14105000	14629000	13225000	8483000	12305000	12;5;5;5;3	12;5;5;5;3	12;5;5;5;3	sp|Q9Y2P8|RCL1_HUMAN RNA 3-terminal phosphate cyclase-like protein OS=Homo sapiens GN=RCL1 PE=1 SV=3	5	12	12	12	10	8	6	4	5	8	10	8	4	7	10	8	6	4	5	8	10	8	4	7	10	8	6	4	5
sp|P08621|RU17_HUMAN;tr|M0QYR1|M0QYR1_HUMAN;tr|M0QX04|M0QX04_HUMAN	sp|P08621|RU17_HUMAN;tr|M0QYR1|M0QYR1_HUMAN	0.998371	1.04143	0.802398	0.883775	1.07457	12894000	12695000	16265000	11994000	10769000	12873000	13221000	13051000	10600000	11572000	10;7;2	10;7;2	10;7;2	sp|P08621|RU17_HUMAN U1 small nuclear ribonucleoprotein 70 kDa OS=Homo sapiens GN=SNRNP70 PE=1 SV=2;tr|M0QYR1|M0QYR1_HUMAN U1 small nuclear ribonucleoprotein 70 kDa (Fragment) OS=Homo sapiens GN=SNRNP70 PE=1 SV=1	3	10	10	10	6	6	8	7	7	6	5	8	7	8	6	6	8	7	7	6	5	8	7	8	6	6	8	7	7
sp|Q9Y224|CN166_HUMAN;tr|H0YJB9|H0YJB9_HUMAN;tr|G3V4C6|G3V4C6_HUMAN	sp|Q9Y224|CN166_HUMAN;tr|H0YJB9|H0YJB9_HUMAN;tr|G3V4C6|G3V4C6_HUMAN	0.906319	1.07656	0.879428	1	2166000	3115900	3432500	4968800	1	1	2824000	3695300	4369700	1	2166000	5;3;3	5;3;3	5;3;3	sp|Q9Y224|CN166_HUMAN UPF0568 protein C14orf166 OS=Homo sapiens GN=C14orf166 PE=1 SV=1;tr|H0YJB9|H0YJB9_HUMAN UPF0568 protein C14orf166 (Fragment) OS=Homo sapiens GN=C14orf166 PE=1 SV=1;tr|G3V4C6|G3V4C6_HUMAN UPF0568 protein C14orf166 OS=Homo sapiens GN=C1	3	5	5	5	4	4	4	1	1	3	5	4	1	2	4	4	4	1	1	3	5	4	1	2	4	4	4	1	1
sp|Q13895|BYST_HUMAN;tr|H7BY94|H7BY94_HUMAN;tr|F8WBL2|F8WBL2_HUMAN	sp|Q13895|BYST_HUMAN	0.904444	0.601318	1.03723	1	1.3767	2097200	4022500	2511400	1	2325200	1896800	2418800	2604900	1	3201100	7;2;2	7;2;2	7;2;2	sp|Q13895|BYST_HUMAN Bystin OS=Homo sapiens GN=BYSL PE=1 SV=3	3	7	7	7	3	4	3	1	5	2	2	3	0	6	3	4	3	1	5	2	2	3	0	6	3	4	3	1	5
sp|O15226|NKRF_HUMAN;tr|A0A087WXT2|A0A087WXT2_HUMAN	sp|O15226|NKRF_HUMAN	0.843301	1.0566	0.789902	1.02259	1.18112	56803000	40566000	55793000	35762000	32856000	47902000	42862000	44071000	36570000	38807000	32;10	32;10	32;10	sp|O15226|NKRF_HUMAN NF-kappa-B-repressing factor OS=Homo sapiens GN=NKRF PE=1 SV=2	2	32	32	32	19	17	22	18	16	21	20	14	12	19	19	17	22	18	16	21	20	14	12	19	19	17	22	18	16
sp|Q9Y230|RUVB2_HUMAN;tr|M0R0Y3|M0R0Y3_HUMAN;tr|X6R2L4|X6R2L4_HUMAN;tr|M0QXI6|M0QXI6_HUMAN;tr|M0R0Z0|M0R0Z0_HUMAN	sp|Q9Y230|RUVB2_HUMAN;tr|M0R0Y3|M0R0Y3_HUMAN	0.972192	0.812027	1.11813	0.938411	0.906039	7012400	8913000	7704200	5960500	5431000	6817400	7237600	8614300	5593400	4920700	16;11;5;3;1	16;11;5;3;1	16;11;5;3;1	sp|Q9Y230|RUVB2_HUMAN RuvB-like 2 OS=Homo sapiens GN=RUVBL2 PE=1 SV=3;tr|M0R0Y3|M0R0Y3_HUMAN RuvB-like 2 OS=Homo sapiens GN=RUVBL2 PE=1 SV=1	5	16	16	16	9	8	12	5	8	9	5	8	4	7	9	8	12	5	8	9	5	8	4	7	9	8	12	5	8
sp|Q9Y3U8|RL36_HUMAN;tr|J3QSB5|J3QSB5_HUMAN;tr|J3KTD3|J3KTD3_HUMAN	sp|Q9Y3U8|RL36_HUMAN	0.886655	0.978901	0.842229	0.822508	1.38647	205920000	139340000	177980000	157190000	104380000	182580000	136400000	149900000	129290000	144720000	5;2;1	5;2;1	5;2;1	sp|Q9Y3U8|RL36_HUMAN 60S ribosomal protein L36 OS=Homo sapiens GN=RPL36 PE=1 SV=3	3	5	5	5	5	5	5	5	5	5	5	4	5	3	5	5	5	5	5	5	5	4	5	3	5	5	5	5	5
sp|O60264|SMCA5_HUMAN	sp|O60264|SMCA5_HUMAN	0.898048	0.860736	0.93683	1	0.987499	9781100	8616700	8670200	1	6863500	8783900	7416700	8122500	1	6777700	24	24	17	sp|O60264|SMCA5_HUMAN SWI/SNF-related matrix-associated actin-dependent regulator of chromatin subfamily A member 5 OS=Homo sapiens GN=SMARCA5 PE=1 SV=1	1	24	24	17	14	11	10	1	13	9	11	12	1	9	14	11	10	1	13	9	11	12	1	9	11	8	6	1	7
sp|Q8N0Y7|PGAM4_HUMAN;tr|Q53RS6|Q53RS6_HUMAN	sp|Q8N0Y7|PGAM4_HUMAN	0.897489	0.592638	0.878563	0.651574	0.778722	8672200	9239700	8441400	7164800	7991300	7783200	5475800	7416300	4668400	6223000	12;3	12;3	12;3	sp|Q8N0Y7|PGAM4_HUMAN Probable phosphoglycerate mutase 4 OS=Homo sapiens GN=PGAM4 PE=3 SV=1	2	12	12	12	7	7	8	4	7	6	6	9	2	6	7	7	8	4	7	6	6	9	2	6	7	7	8	4	7
sp|Q86U38|NOP9_HUMAN	sp|Q86U38|NOP9_HUMAN	0.895708	0.976235	0.790074	1	1.50636	2882300	2583600	2893400	1	2713700	2581700	2522200	2286000	1	4087800	5	5	5	sp|Q86U38|NOP9_HUMAN Nucleolar protein 9 OS=Homo sapiens GN=NOP9 PE=1 SV=1	1	5	5	5	3	4	5	1	2	3	4	2	1	3	3	4	5	1	2	3	4	2	1	3	3	4	5	1	2
sp|Q8WTT2|NOC3L_HUMAN	sp|Q8WTT2|NOC3L_HUMAN	0.994996	0.832188	1.15396	0.828266	0.913204	42969000	61718000	46221000	29668000	34967000	42754000	51361000	53337000	24573000	31932000	21	21	21	sp|Q8WTT2|NOC3L_HUMAN Nucleolar complex protein 3 homolog OS=Homo sapiens GN=NOC3L PE=1 SV=1	1	21	21	21	14	17	16	9	11	14	15	17	9	13	14	17	16	9	11	14	15	17	9	13	14	17	16	9	11
sp|P62263|RS14_HUMAN;tr|H0YB22|H0YB22_HUMAN;tr|E5RH77|E5RH77_HUMAN	sp|P62263|RS14_HUMAN;tr|H0YB22|H0YB22_HUMAN;tr|E5RH77|E5RH77_HUMAN	0.893159	0.932985	0.944057	1	0.926138	11241000	13594000	11333000	1	10980000	10040000	12683000	10699000	1	10169000	6;4;4	6;4;4	6;4;4	sp|P62263|RS14_HUMAN 40S ribosomal protein S14 OS=Homo sapiens GN=RPS14 PE=1 SV=3;tr|H0YB22|H0YB22_HUMAN 40S ribosomal protein S14 (Fragment) OS=Homo sapiens GN=RPS14 PE=1 SV=1;tr|E5RH77|E5RH77_HUMAN 40S ribosomal protein S14 OS=Homo sapiens GN=RPS14 PE=1	3	6	6	6	4	5	4	2	4	3	5	4	1	4	4	5	4	2	4	3	5	4	1	4	4	5	4	2	4
tr|C9J4Z3|C9J4Z3_HUMAN;sp|P61513|RL37A_HUMAN;tr|M0R0A1|M0R0A1_HUMAN;tr|Q6P4E4|Q6P4E4_HUMAN;tr|E9PEL3|E9PEL3_HUMAN;tr|M0R2L6|M0R2L6_HUMAN;tr|G5E9R3|G5E9R3_HUMAN;sp|A6NKH3|RL37L_HUMAN	tr|C9J4Z3|C9J4Z3_HUMAN;sp|P61513|RL37A_HUMAN;tr|M0R0A1|M0R0A1_HUMAN;tr|Q6P4E4|Q6P4E4_HUMAN;tr|E9PEL3|E9PEL3_HUMAN;tr|M0R2L6|M0R2L6_HUMAN;tr|G5E9R3|G5E9R3_HUMAN	0.858096	1.06128	0.913338	0.929776	1.00466	39259000	40634000	55803000	30716000	17825000	33688000	43124000	50967000	28559000	17908000	5;5;4;4;4;4;3;1	5;5;4;4;4;4;3;1	5;5;4;4;4;4;3;1	tr|C9J4Z3|C9J4Z3_HUMAN 60S ribosomal protein L37a OS=Homo sapiens GN=RPL37A PE=1 SV=1;sp|P61513|RL37A_HUMAN 60S ribosomal protein L37a OS=Homo sapiens GN=RPL37A PE=1 SV=2;tr|M0R0A1|M0R0A1_HUMAN 60S ribosomal protein L37a OS=Homo sapiens GN=RPL37A PE=1 SV=1	8	5	5	5	4	3	5	2	3	3	4	5	2	4	4	3	5	2	3	3	4	5	2	4	4	3	5	2	3
sp|Q7Z2W4|ZCCHV_HUMAN;tr|C9J6P4|C9J6P4_HUMAN;tr|H7C5K1|H7C5K1_HUMAN	sp|Q7Z2W4|ZCCHV_HUMAN;tr|C9J6P4|C9J6P4_HUMAN	0.901575	0.929186	0.979344	1.18289	0.767115	6729000	5569500	5378700	4867900	5518600	6066700	5175100	5267600	5758200	4233400	15;14;4	15;14;4	15;14;4	sp|Q7Z2W4|ZCCHV_HUMAN Zinc finger CCCH-type antiviral protein 1 OS=Homo sapiens GN=ZC3HAV1 PE=1 SV=3;tr|C9J6P4|C9J6P4_HUMAN Zinc finger CCCH-type antiviral protein 1 OS=Homo sapiens GN=ZC3HAV1 PE=1 SV=1	3	15	15	15	7	7	12	3	6	8	7	5	4	6	7	7	12	3	6	8	7	5	4	6	7	7	12	3	6
sp|Q92900|RENT1_HUMAN	sp|Q92900|RENT1_HUMAN	1.09941	0.98675	0.790212	1.0089	0.827759	17895000	16227000	14262000	16292000	20721000	19674000	16012000	11270000	16437000	17152000	29	29	29	sp|Q92900|RENT1_HUMAN Regulator of nonsense transcripts 1 OS=Homo sapiens GN=UPF1 PE=1 SV=2	1	29	29	29	17	16	15	8	18	16	18	12	9	18	17	16	15	8	18	16	18	12	9	18	17	16	15	8	18
sp|Q13435|SF3B2_HUMAN;tr|A0A087WZZ5|A0A087WZZ5_HUMAN;tr|E9PPJ0|E9PPJ0_HUMAN;tr|E9PJ04|E9PJ04_HUMAN;tr|E9PJT3|E9PJT3_HUMAN;tr|H0YCG1|H0YCG1_HUMAN;tr|H0YEX5|H0YEX5_HUMAN;tr|E9PIL8|E9PIL8_HUMAN	sp|Q13435|SF3B2_HUMAN;tr|A0A087WZZ5|A0A087WZZ5_HUMAN;tr|E9PPJ0|E9PPJ0_HUMAN	0.881512	0.748174	0.871655	0.534202	1.1476	17968000	20669000	21450000	15619000	12398000	15839000	15464000	18697000	8343700	14228000	24;23;23;10;9;9;8;2	24;23;23;10;9;9;8;2	24;23;23;10;9;9;8;2	sp|Q13435|SF3B2_HUMAN Splicing factor 3B subunit 2 OS=Homo sapiens GN=SF3B2 PE=1 SV=2;tr|A0A087WZZ5|A0A087WZZ5_HUMAN Splicing factor 3B subunit 2 OS=Homo sapiens GN=SF3B2 PE=1 SV=1;tr|E9PPJ0|E9PPJ0_HUMAN Splicing factor 3B subunit 2 OS=Homo sapiens GN=SF3B	8	24	24	24	16	15	17	9	7	14	15	14	4	11	16	15	17	9	7	14	15	14	4	11	16	15	17	9	7
tr|J3QLE5|J3QLE5_HUMAN;sp|P63162|RSMN_HUMAN;sp|P14678|RSMB_HUMAN;tr|A8MT02|A8MT02_HUMAN;tr|J3KRY3|J3KRY3_HUMAN;tr|S4R3P3|S4R3P3_HUMAN	tr|J3QLE5|J3QLE5_HUMAN;sp|P63162|RSMN_HUMAN;sp|P14678|RSMB_HUMAN;tr|A8MT02|A8MT02_HUMAN	0.88079	0.968518	0.902718	0.501027	1.10839	8624300	7772800	9823000	10223000	4335100	7596200	7528100	8867400	5122000	4805000	5;5;5;5;2;2	5;5;5;5;2;2	5;5;5;5;2;2	tr|J3QLE5|J3QLE5_HUMAN Small nuclear ribonucleoprotein-associated protein N (Fragment) OS=Homo sapiens GN=SNRPN PE=4 SV=1;sp|P63162|RSMN_HUMAN Small nuclear ribonucleoprotein-associated protein N OS=Homo sapiens GN=SNRPN PE=1 SV=1;sp|P14678|RSMB_HUMAN Smal	6	5	5	5	2	2	2	1	2	4	4	4	2	3	2	2	2	1	2	4	4	4	2	3	2	2	2	1	2
tr|G3V4W0|G3V4W0_HUMAN;tr|B4DY08|B4DY08_HUMAN;tr|G3V4C1|G3V4C1_HUMAN;tr|B2R5W2|B2R5W2_HUMAN;tr|G3V2Q1|G3V2Q1_HUMAN;sp|P07910|HNRPC_HUMAN;tr|G3V576|G3V576_HUMAN;tr|G3V2D6|G3V2D6_HUMAN;tr|G3V5V7|G3V5V7_HUMAN;tr|G3V555|G3V555_HUMAN;tr|G3V575|G3V575_HUMAN;sp|P0DMR1|HNRC4_HUMAN;tr|G3V5X6|G3V5X6_HUMAN;sp|O60812|HNRC1_HUMAN;tr|A0A0G2JPF8|A0A0G2JPF8_HUMAN;tr|A0A0G2JNQ3|A0A0G2JNQ3_HUMAN;tr|G3V3K6|G3V3K6_H…	tr|G3V4W0|G3V4W0_HUMAN;tr|B4DY08|B4DY08_HUMAN;tr|G3V4C1|G3V4C1_HUMAN;tr|B2R5W2|B2R5W2_HUMAN;tr|G3V2Q1|G3V2Q1_HUMAN;sp|P07910|HNRPC_HUMAN;tr|G3V576|G3V576_HUMAN;tr|G3V2D6|G3V2D6_HUMAN;tr|G3V5V7|G3V5V7_HUMAN;tr|G3V555|G3V555_HUMAN;tr|G3V575|G3V575_HUMAN	1.03563	0.914902	0.886537	0.906338	0.990286	236290000	323980000	302300000	177020000	224420000	244710000	296410000	268000000	160440000	222240000	17;17;17;17;16;16;14;11;10;9;9;7;7;7;7;7;7;7;7;7;6;5;4	17;17;17;17;16;16;14;11;10;9;9;7;7;7;7;7;7;7;7;7;6;5;4	17;17;17;17;16;16;14;11;10;9;9;7;7;7;7;7;7;7;7;7;6;5;4	tr|G3V4W0|G3V4W0_HUMAN Heterogeneous nuclear ribonucleoproteins C1/C2 (Fragment) OS=Homo sapiens GN=HNRNPC PE=1 SV=1;tr|B4DY08|B4DY08_HUMAN Heterogeneous nuclear ribonucleoproteins C1/C2 OS=Homo sapiens GN=HNRNPC PE=1 SV=1;tr|G3V4C1|G3V4C1_HUMAN Heterogene	23	17	17	17	13	14	12	10	12	14	14	13	11	12	13	14	12	10	12	14	14	13	11	12	13	14	12	10	12
sp|P62906|RL10A_HUMAN	sp|P62906|RL10A_HUMAN	0.889287	1.12441	0.906202	0.775014	1.05283	544470000	420220000	516110000	435360000	387690000	484190000	472500000	467700000	337410000	408170000	14	14	14	sp|P62906|RL10A_HUMAN 60S ribosomal protein L10a OS=Homo sapiens GN=RPL10A PE=1 SV=2	1	14	14	14	9	10	10	7	4	11	8	8	8	5	9	10	10	7	4	11	8	8	8	5	9	10	10	7	4
sp|P38432|COIL_HUMAN	sp|P38432|COIL_HUMAN	0.760058	0.952657	0.983454	1.15505	0.965595	13795000	6961900	10637000	7292700	12934000	10485000	6632300	10461000	8423400	12489000	12	12	12	sp|P38432|COIL_HUMAN Coilin OS=Homo sapiens GN=COIL PE=1 SV=1	1	12	12	12	10	7	8	6	5	7	6	7	6	8	10	7	8	6	5	7	6	7	6	8	10	7	8	6	5
sp|Q14137|BOP1_HUMAN;tr|A0A075B729|A0A075B729_HUMAN	sp|Q14137|BOP1_HUMAN	0.781306	0.753915	0.704327	1.09436	1.40054	27303000	24268000	29766000	15579000	28714000	21332000	18296000	20965000	17049000	40215000	18;7	18;7	18;7	sp|Q14137|BOP1_HUMAN Ribosome biogenesis protein BOP1 OS=Homo sapiens GN=BOP1 PE=1 SV=2	2	18	18	18	14	9	10	4	12	8	8	9	5	13	14	9	10	4	12	8	8	9	5	13	14	9	10	4	12
tr|A8MXP9|A8MXP9_HUMAN;sp|P43243|MATR3_HUMAN;tr|D6REM6|D6REM6_HUMAN;tr|D6R991|D6R991_HUMAN;tr|H0Y8T4|H0Y8T4_HUMAN;tr|B3KM87|B3KM87_HUMAN;tr|Q68E03|Q68E03_HUMAN;tr|D6RIA2|D6RIA2_HUMAN;tr|D6R8Z5|D6R8Z5_HUMAN;tr|D6RBI2|D6RBI2_HUMAN;tr|D6RE02|D6RE02_HUMAN;tr|D6RB45|D6RB45_HUMAN;tr|D6R9F3|D6R9F3_HUMAN;tr|D6REK4|D6REK4_HUMAN;tr|D6RCM3|D6RCM3_HUMAN;tr|D6RBS2|D6RBS2_HUMAN;tr|D6RAY2|D6RAY2_HUMAN;tr|D6RAM9…	tr|A8MXP9|A8MXP9_HUMAN;sp|P43243|MATR3_HUMAN;tr|D6REM6|D6REM6_HUMAN;tr|D6R991|D6R991_HUMAN	1.09481	0.800312	0.86771	0.915169	1.05405	95788000	128000000	107060000	78662000	78744000	104870000	102440000	92897000	71989000	83000000	32;32;29;24;12;11;6;3;3;3;3;2;2;2;2;2;2;2;2	32;32;29;24;12;11;6;3;3;3;3;2;2;2;2;2;2;2;2	32;32;29;24;12;11;6;3;3;3;3;2;2;2;2;2;2;2;2	tr|A8MXP9|A8MXP9_HUMAN Matrin-3 OS=Homo sapiens GN=MATR3 PE=1 SV=1;sp|P43243|MATR3_HUMAN Matrin-3 OS=Homo sapiens GN=MATR3 PE=1 SV=2;tr|D6REM6|D6REM6_HUMAN Matrin-3 OS=Homo sapiens GN=MATR3 PE=1 SV=1;tr|D6R991|D6R991_HUMAN Matrin-3 (Fragment) OS=Homo sapie	19	32	32	32	19	21	20	14	19	19	19	21	13	21	19	21	20	14	19	19	19	21	13	21	19	21	20	14	19
sp|Q9BQ39|DDX50_HUMAN;tr|A0A087WVC1|A0A087WVC1_HUMAN	sp|Q9BQ39|DDX50_HUMAN;tr|A0A087WVC1|A0A087WVC1_HUMAN	0.923013	0.897744	0.896	0.770294	1.25804	19120000	18219000	18798000	12701000	10103000	17648000	16356000	16843000	9783500	12710000	26;24	24;22	24;22	sp|Q9BQ39|DDX50_HUMAN ATP-dependent RNA helicase DDX50 OS=Homo sapiens GN=DDX50 PE=1 SV=1;tr|A0A087WVC1|A0A087WVC1_HUMAN ATP-dependent RNA helicase DDX50 OS=Homo sapiens GN=DDX50 PE=1 SV=1	2	26	24	24	15	16	15	7	10	17	14	11	6	11	14	14	14	6	9	16	12	10	4	10	14	14	14	6	9
tr|M0R3D6|M0R3D6_HUMAN;tr|M0R1A7|M0R1A7_HUMAN;sp|Q02543|RL18A_HUMAN;tr|M0R117|M0R117_HUMAN;tr|M0R0P7|M0R0P7_HUMAN	tr|M0R3D6|M0R3D6_HUMAN;tr|M0R1A7|M0R1A7_HUMAN;sp|Q02543|RL18A_HUMAN;tr|M0R117|M0R117_HUMAN;tr|M0R0P7|M0R0P7_HUMAN	0.813979	0.949685	0.981344	0.968359	0.963267	339800000	252610000	304990000	258210000	175590000	276590000	239900000	299300000	250040000	169140000	11;11;11;10;8	11;11;11;10;8	11;11;11;10;8	tr|M0R3D6|M0R3D6_HUMAN 60S ribosomal protein L18a (Fragment) OS=Homo sapiens GN=RPL18A PE=1 SV=1;tr|M0R1A7|M0R1A7_HUMAN 60S ribosomal protein L18a OS=Homo sapiens GN=RPL18A PE=1 SV=1;sp|Q02543|RL18A_HUMAN 60S ribosomal protein L18a OS=Homo sapiens GN=RPL18	5	11	11	11	11	9	9	9	10	9	9	9	8	8	11	9	9	9	10	9	9	9	8	8	11	9	9	9	10
sp|P61313|RL15_HUMAN;tr|E7EQV9|E7EQV9_HUMAN;tr|E7ENU7|E7ENU7_HUMAN;tr|E7EX53|E7EX53_HUMAN;tr|E7ERA2|E7ERA2_HUMAN	sp|P61313|RL15_HUMAN;tr|E7EQV9|E7EQV9_HUMAN;tr|E7ENU7|E7ENU7_HUMAN	0.926815	1.11776	0.725164	0.895046	1.03629	521690000	489570000	612620000	640470000	478370000	483510000	547220000	444250000	573250000	495730000	15;12;11;7;2	15;12;11;7;2	15;12;11;7;2	sp|P61313|RL15_HUMAN 60S ribosomal protein L15 OS=Homo sapiens GN=RPL15 PE=1 SV=2;tr|E7EQV9|E7EQV9_HUMAN Ribosomal protein L15 (Fragment) OS=Homo sapiens GN=RPL15 PE=1 SV=1;tr|E7ENU7|E7ENU7_HUMAN Ribosomal protein L15 (Fragment) OS=Homo sapiens GN=RPL15 PE	5	15	15	15	13	11	13	12	11	12	13	11	13	12	13	11	13	12	11	12	13	11	13	12	13	11	13	12	11
sp|Q9H6R4|NOL6_HUMAN;tr|A0A0A0MRW6|A0A0A0MRW6_HUMAN;tr|A0A0C4DFX0|A0A0C4DFX0_HUMAN	sp|Q9H6R4|NOL6_HUMAN;tr|A0A0A0MRW6|A0A0A0MRW6_HUMAN	0.866419	1.04735	1.12885	1	1.25844	12090000	6541100	8232000	1	6520400	10475000	6850800	9292700	1	8205500	17;16;1	17;16;1	17;16;1	sp|Q9H6R4|NOL6_HUMAN Nucleolar protein 6 OS=Homo sapiens GN=NOL6 PE=1 SV=2;tr|A0A0A0MRW6|A0A0A0MRW6_HUMAN Nucleolar protein 6 OS=Homo sapiens GN=NOL6 PE=1 SV=1	3	17	17	17	11	9	10	1	7	9	8	6	1	8	11	9	10	1	7	9	8	6	1	8	11	9	10	1	7
sp|Q99848|EBP2_HUMAN;tr|Q6ZWE5|Q6ZWE5_HUMAN	sp|Q99848|EBP2_HUMAN;tr|Q6ZWE5|Q6ZWE5_HUMAN	0.880093	1.03343	1.04328	0.712603	1.04749	429250000	546550000	452430000	668240000	433370000	377780000	564820000	472010000	476190000	453950000	20;20	20;20	20;20	sp|Q99848|EBP2_HUMAN Probable rRNA-processing protein EBP2 OS=Homo sapiens GN=EBNA1BP2 PE=1 SV=2;tr|Q6ZWE5|Q6ZWE5_HUMAN Monocarboxylate transporter 14 (Fragment) OS=Homo sapiens GN=SLC16A14 PE=2 SV=1	2	20	20	20	16	13	14	13	11	16	16	12	15	15	16	13	14	13	11	16	16	12	15	15	16	13	14	13	11
sp|Q5C9Z4|NOM1_HUMAN	sp|Q5C9Z4|NOM1_HUMAN	0.862568	0.76142	1	4900200	1.1049	7082800	11620000	1	1	5488900	6109400	8847700	1	4900200	6064700	9	9	9	sp|Q5C9Z4|NOM1_HUMAN Nucleolar MIF4G domain-containing protein 1 OS=Homo sapiens GN=NOM1 PE=1 SV=1	1	9	9	9	3	7	1	0	3	5	3	2	2	4	3	7	1	0	3	5	3	2	2	4	3	7	1	0	3
sp|Q5T3I0|GPTC4_HUMAN;tr|A0A0A0MRK1|A0A0A0MRK1_HUMAN;tr|E9PAV9|E9PAV9_HUMAN;tr|F8W895|F8W895_HUMAN;tr|E9PPY4|E9PPY4_HUMAN;tr|F2Z3C6|F2Z3C6_HUMAN	sp|Q5T3I0|GPTC4_HUMAN;tr|A0A0A0MRK1|A0A0A0MRK1_HUMAN;tr|E9PAV9|E9PAV9_HUMAN;tr|F8W895|F8W895_HUMAN	1.3574	0.892879	0.889087	0.854212	0.712438	7599100	7597000	7180400	10363000	9788500	10315000	6783200	6384000	8852200	6973700	12;10;10;6;2;2	12;10;10;6;2;2	12;10;10;6;2;2	sp|Q5T3I0|GPTC4_HUMAN G patch domain-containing protein 4 OS=Homo sapiens GN=GPATCH4 PE=1 SV=2;tr|A0A0A0MRK1|A0A0A0MRK1_HUMAN G patch domain-containing protein 4 OS=Homo sapiens GN=GPATCH4 PE=1 SV=1;tr|E9PAV9|E9PAV9_HUMAN G patch domain-containing protein	6	12	12	12	7	8	5	4	5	11	5	4	4	3	7	8	5	4	5	11	5	4	4	3	7	8	5	4	5
sp|P78346|RPP30_HUMAN;tr|Q5VU11|Q5VU11_HUMAN;tr|Q5VU10|Q5VU10_HUMAN	sp|P78346|RPP30_HUMAN;tr|Q5VU11|Q5VU11_HUMAN;tr|Q5VU10|Q5VU10_HUMAN	0.862076	0.691443	0.768171	1	0.894537	6130200	5522800	4566300	1	3995700	5284700	3818700	3507700	1	3574300	8;7;4	8;7;4	8;7;4	sp|P78346|RPP30_HUMAN Ribonuclease P protein subunit p30 OS=Homo sapiens GN=RPP30 PE=1 SV=1;tr|Q5VU11|Q5VU11_HUMAN Ribonuclease P protein subunit p30 (Fragment) OS=Homo sapiens GN=RPP30 PE=1 SV=1;tr|Q5VU10|Q5VU10_HUMAN Ribonuclease P protein subunit p30 (F	3	8	8	8	4	3	2	1	4	4	5	2	1	2	4	3	2	1	4	4	5	2	1	2	4	3	2	1	4
sp|Q9H0D6|XRN2_HUMAN	sp|Q9H0D6|XRN2_HUMAN	0.983789	0.89473	0.947757	0.805854	0.993682	35901000	36810000	38436000	38677000	33081000	35319000	32935000	36428000	31168000	32872000	29	29	29	sp|Q9H0D6|XRN2_HUMAN 5-3 exoribonuclease 2 OS=Homo sapiens GN=XRN2 PE=1 SV=1	1	29	29	29	18	16	20	11	13	20	19	14	9	15	18	16	20	11	13	20	19	14	9	15	18	16	20	11	13
sp|P46777|RL5_HUMAN;tr|Q5T7N0|Q5T7N0_HUMAN;tr|R4GNJ2|R4GNJ2_HUMAN	sp|P46777|RL5_HUMAN	0.856391	0.890783	0.648778	0.871144	1.10335	380130000	283930000	335030000	296300000	235320000	325540000	252920000	217360000	258120000	259640000	20;5;1	20;5;1	20;5;1	sp|P46777|RL5_HUMAN 60S ribosomal protein L5 OS=Homo sapiens GN=RPL5 PE=1 SV=3	3	20	20	20	15	12	15	12	13	16	14	13	14	13	15	12	15	12	13	16	14	13	14	13	15	12	15	12	13
sp|P62851|RS25_HUMAN;tr|E9PQK3|E9PQK3_HUMAN;tr|E9PK60|E9PK60_HUMAN	sp|P62851|RS25_HUMAN	0.854103	1.11057	0.693227	0.750651	0.700607	60426000	47145000	63415000	33423000	61314000	51610000	52358000	43961000	25089000	42957000	5;1;1	5;1;1	5;1;1	sp|P62851|RS25_HUMAN 40S ribosomal protein S25 OS=Homo sapiens GN=RPS25 PE=1 SV=1	3	5	5	5	4	3	2	3	2	4	4	3	3	4	4	3	2	3	2	4	4	3	3	4	4	3	2	3	2
sp|Q8N9T8|KRI1_HUMAN;tr|F8WFC1|F8WFC1_HUMAN;tr|H0YH26|H0YH26_HUMAN	sp|Q8N9T8|KRI1_HUMAN	0.851796	0.753976	0.741313	1	1.02128	4916200	6343700	5070600	1	2922800	4187600	4783000	3758900	1	2985000	9;4;1	9;4;1	6;1;1	sp|Q8N9T8|KRI1_HUMAN Protein KRI1 homolog OS=Homo sapiens GN=KRI1 PE=1 SV=3	3	9	9	6	7	6	7	1	2	5	4	5	0	2	7	6	7	1	2	5	4	5	0	2	4	4	5	0	0
sp|Q9Y6V7|DDX49_HUMAN;tr|M0R1S3|M0R1S3_HUMAN;tr|M0QZC0|M0QZC0_HUMAN;tr|Q5XG96|Q5XG96_HUMAN	sp|Q9Y6V7|DDX49_HUMAN	0.847891	1379500	1.28698	1	0.761422	1332600	1	1231100	1	1676600	1129900	1379500	1584400	1	1276600	3;1;1;1	3;1;1;1	3;1;1;1	sp|Q9Y6V7|DDX49_HUMAN Probable ATP-dependent RNA helicase DDX49 OS=Homo sapiens GN=DDX49 PE=1 SV=1	4	3	3	3	2	1	3	1	2	3	2	2	0	3	2	1	3	1	2	3	2	2	0	3	2	1	3	1	2
sp|Q9H4L4|SENP3_HUMAN;tr|A0A087X0R7|A0A087X0R7_HUMAN;tr|J3QL36|J3QL36_HUMAN;tr|J3QRE4|J3QRE4_HUMAN;tr|A0A087WV50|A0A087WV50_HUMAN;tr|J3KSF5|J3KSF5_HUMAN	sp|Q9H4L4|SENP3_HUMAN;tr|A0A087X0R7|A0A087X0R7_HUMAN;tr|J3QL36|J3QL36_HUMAN	0.846148	0.946277	3.18776e-07	1	1.62072	3966800	3425000	3137000	1	2361600	3356500	3241000	1	1	3827500	12;11;7;4;4;2	12;11;7;4;4;2	12;11;7;4;4;2	sp|Q9H4L4|SENP3_HUMAN Sentrin-specific protease 3 OS=Homo sapiens GN=SENP3 PE=1 SV=2;tr|A0A087X0R7|A0A087X0R7_HUMAN Protein SENP3-EIF4A1 (Fragment) OS=Homo sapiens GN=SENP3-EIF4A1 PE=4 SV=1;tr|J3QL36|J3QL36_HUMAN Sentrin-specific protease 3 (Fragment) OS=H	6	12	12	12	7	5	5	0	5	4	6	2	0	3	7	5	5	0	5	4	6	2	0	3	7	5	5	0	5
sp|O15042|SR140_HUMAN;tr|E7ET15|E7ET15_HUMAN;tr|H7C4V2|H7C4V2_HUMAN;tr|E7EW00|E7EW00_HUMAN;tr|H0Y8D9|H0Y8D9_HUMAN	sp|O15042|SR140_HUMAN;tr|E7ET15|E7ET15_HUMAN	0.84478	0.683445	0.826208	1.44296e-07	0.626838	7912000	9917400	8407200	6930200	10854000	6683900	6778000	6946100	1	6803700	18;17;5;4;4	18;17;5;4;4	18;17;5;4;4	sp|O15042|SR140_HUMAN U2 snRNP-associated SURP motif-containing protein OS=Homo sapiens GN=U2SURP PE=1 SV=2;tr|E7ET15|E7ET15_HUMAN U2 snRNP-associated SURP motif-containing protein OS=Homo sapiens GN=U2SURP PE=1 SV=1	5	18	18	18	9	7	5	5	8	7	6	5	1	9	9	7	5	5	8	7	6	5	1	9	9	7	5	5	8
sp|P38919|IF4A3_HUMAN;tr|I3L3H2|I3L3H2_HUMAN;tr|J3QL52|J3QL52_HUMAN;tr|J3QQP0|J3QQP0_HUMAN;tr|E9PBH4|E9PBH4_HUMAN;tr|F8WE11|F8WE11_HUMAN	sp|P38919|IF4A3_HUMAN	0.911775	0.857132	0.966015	0.966438	0.893022	41190000	38959000	44814000	44247000	42392000	37556000	33393000	43291000	42762000	37857000	22;5;2;1;1;1	22;5;2;1;1;1	19;4;0;0;0;0	sp|P38919|IF4A3_HUMAN Eukaryotic initiation factor 4A-III OS=Homo sapiens GN=EIF4A3 PE=1 SV=4	6	22	22	19	15	14	14	14	13	11	11	13	12	12	15	14	14	14	13	11	11	13	12	12	13	13	12	13	12
sp|P46778|RL21_HUMAN;tr|G3V1B3|G3V1B3_HUMAN;tr|M0R181|M0R181_HUMAN;tr|M0R3I5|M0R3I5_HUMAN	sp|P46778|RL21_HUMAN;tr|G3V1B3|G3V1B3_HUMAN;tr|M0R181|M0R181_HUMAN	0.763122	1.0469	0.810348	0.985441	1.01844	218340000	258630000	321800000	225980000	206670000	166620000	270760000	260770000	222690000	210480000	11;6;6;1	11;6;6;1	11;6;6;1	sp|P46778|RL21_HUMAN 60S ribosomal protein L21 OS=Homo sapiens GN=RPL21 PE=1 SV=2;tr|G3V1B3|G3V1B3_HUMAN 60S ribosomal protein L21 OS=Homo sapiens GN=RPL21 PE=1 SV=1;tr|M0R181|M0R181_HUMAN 60S ribosomal protein L21 (Fragment) OS=Homo sapiens GN=RPL21 PE=1	4	11	11	11	6	7	6	7	6	8	6	6	7	7	6	7	6	7	6	8	6	6	7	7	6	7	6	7	6
sp|P51532|SMCA4_HUMAN;tr|A0A0A0MT49|A0A0A0MT49_HUMAN;tr|Q9HBD4|Q9HBD4_HUMAN;sp|P51531|SMCA2_HUMAN;tr|K7EP28|K7EP28_HUMAN;tr|A0A0A0MSS5|A0A0A0MSS5_HUMAN;tr|F6UH26|F6UH26_HUMAN;tr|B1ALG1|B1ALG1_HUMAN;tr|F6T8Q0|F6T8Q0_HUMAN;tr|B1ALG2|B1ALG2_HUMAN;tr|F6XG14|F6XG14_HUMAN;tr|B1ALF6|B1ALF6_HUMAN;tr|F6XE55|F6XE55_HUMAN;tr|A0A0A0MS59|A0A0A0MS59_HUMAN;sp|Q6ZRS2|SRCAP_HUMAN;tr|F6VDE0|F6VDE0_HUMAN;tr|A0A087X…	sp|P51532|SMCA4_HUMAN;tr|A0A0A0MT49|A0A0A0MT49_HUMAN;tr|Q9HBD4|Q9HBD4_HUMAN	0.843214	0.534163	0.980129	2.71091e-07	0.86968	6386400	9915700	5993600	3688800	6510900	5385100	5296600	5874500	1	5662400	20;20;20;9;2;2;2;2;2;2;2;2;2;1;1;1;1;1	20;20;20;9;2;2;2;2;2;2;2;2;2;1;1;1;1;1	20;20;20;9;2;2;2;2;2;2;2;2;2;1;1;1;1;1	sp|P51532|SMCA4_HUMAN Transcription activator BRG1 OS=Homo sapiens GN=SMARCA4 PE=1 SV=2;tr|A0A0A0MT49|A0A0A0MT49_HUMAN Transcription activator BRG1 OS=Homo sapiens GN=SMARCA4 PE=1 SV=1;tr|Q9HBD4|Q9HBD4_HUMAN SMARCA4 isoform 2 OS=Homo sapiens GN=SMARCA4 PE=	18	20	20	20	9	12	12	3	8	10	10	5	1	9	9	12	12	3	8	10	10	5	1	9	9	12	12	3	8
sp|Q9GZR7|DDX24_HUMAN;tr|G3V529|G3V529_HUMAN;tr|F5GYL3|F5GYL3_HUMAN;tr|A0A087WXU8|A0A087WXU8_HUMAN	sp|Q9GZR7|DDX24_HUMAN;tr|G3V529|G3V529_HUMAN;tr|F5GYL3|F5GYL3_HUMAN;tr|A0A087WXU8|A0A087WXU8_HUMAN	1.03577	0.901287	0.932234	0.70545	1.05629	16688000	17951000	15096000	20533000	14531000	17285000	16179000	14073000	14485000	15349000	23;22;16;14	23;22;16;14	23;22;16;14	sp|Q9GZR7|DDX24_HUMAN ATP-dependent RNA helicase DDX24 OS=Homo sapiens GN=DDX24 PE=1 SV=1;tr|G3V529|G3V529_HUMAN ATP-dependent RNA helicase DDX24 OS=Homo sapiens GN=DDX24 PE=1 SV=1;tr|F5GYL3|F5GYL3_HUMAN ATP-dependent RNA helicase DDX24 OS=Homo sapiens GN=	4	23	23	23	15	12	11	12	14	12	13	11	7	14	15	12	11	12	14	12	13	11	7	14	15	12	11	12	14
sp|Q9NPD3|EXOS4_HUMAN;tr|E9PI41|E9PI41_HUMAN;tr|E9PPI9|E9PPI9_HUMAN	sp|Q9NPD3|EXOS4_HUMAN;tr|E9PI41|E9PI41_HUMAN	0.922868	1.05364	0.771528	0.810557	1.02549	6832400	6054700	7825900	5778000	6195500	6305400	6379500	6037900	4683400	6353400	5;3;2	5;3;2	5;3;2	sp|Q9NPD3|EXOS4_HUMAN Exosome complex component RRP41 OS=Homo sapiens GN=EXOSC4 PE=1 SV=3;tr|E9PI41|E9PI41_HUMAN Exosome complex component RRP41 (Fragment) OS=Homo sapiens GN=EXOSC4 PE=1 SV=5	3	5	5	5	5	3	3	3	3	4	2	2	3	5	5	3	3	3	3	4	2	2	3	5	5	3	3	3	3
sp|O75400|PR40A_HUMAN;tr|H7C2N3|H7C2N3_HUMAN;tr|F5H578|F5H578_HUMAN	sp|O75400|PR40A_HUMAN	0.835709	1	1	1	0.996413	3129200	1	1	1	3233900	2615100	1	1	1	3222300	4;1;1	4;1;1	4;1;1	sp|O75400|PR40A_HUMAN Pre-mRNA-processing factor 40 homolog A OS=Homo sapiens GN=PRPF40A PE=1 SV=2	3	4	4	4	3	0	2	1	2	3	0	0	0	2	3	0	2	1	2	3	0	0	0	2	3	0	2	1	2
sp|P09661|RU2A_HUMAN;tr|Q8TDP4|Q8TDP4_HUMAN;tr|H0YMA0|H0YMA0_HUMAN;tr|H0YLR3|H0YLR3_HUMAN	sp|P09661|RU2A_HUMAN;tr|Q8TDP4|Q8TDP4_HUMAN;tr|H0YMA0|H0YMA0_HUMAN	0.878119	0.983756	0.870355	0.845908	0.985489	8232600	7707600	9327800	7160000	6884300	7229200	7582400	8118500	6056700	6784400	8;5;4;3	8;5;4;3	8;5;4;3	sp|P09661|RU2A_HUMAN U2 small nuclear ribonucleoprotein A OS=Homo sapiens GN=SNRPA1 PE=1 SV=2;tr|Q8TDP4|Q8TDP4_HUMAN C-C chemokine receptor type 3 (Fragment) OS=Homo sapiens GN=CCR3 PE=2 SV=1;tr|H0YMA0|H0YMA0_HUMAN U2 small nuclear ribonucleoprotein A (F	4	8	8	8	5	4	4	3	4	5	1	6	3	4	5	4	4	3	4	5	1	6	3	4	5	4	4	3	4
sp|Q9BVI4|NOC4L_HUMAN;tr|F5H303|F5H303_HUMAN	sp|Q9BVI4|NOC4L_HUMAN	0.832444	0.631895	0.928711	1.51944	1.00646	7737700	13165000	7256400	3429300	7722900	6441200	8318900	6739100	5210600	7772800	17;6	17;6	17;6	sp|Q9BVI4|NOC4L_HUMAN Nucleolar complex protein 4 homolog OS=Homo sapiens GN=NOC4L PE=1 SV=1	2	17	17	17	7	12	9	2	6	5	12	7	3	6	7	12	9	2	6	5	12	7	3	6	7	12	9	2	6
sp|Q15393|SF3B3_HUMAN;tr|I3L4G7|I3L4G7_HUMAN;tr|H3BMB0|H3BMB0_HUMAN;tr|J3QRB2|J3QRB2_HUMAN;tr|J3QL37|J3QL37_HUMAN;tr|J3QKV4|J3QKV4_HUMAN	sp|Q15393|SF3B3_HUMAN	0.831564	0.770782	0.780674	0.277238	0.903495	17146000	17106000	18069000	14700000	15595000	14258000	13185000	14106000	4075400	14090000	28;4;2;2;2;1	28;4;2;2;2;1	28;4;2;2;2;1	sp|Q15393|SF3B3_HUMAN Splicing factor 3B subunit 3 OS=Homo sapiens GN=SF3B3 PE=1 SV=4	6	28	28	28	16	17	16	8	16	10	13	14	2	21	16	17	16	8	16	10	13	14	2	21	16	17	16	8	16
sp|P62424|RL7A_HUMAN;tr|Q5T8U2|Q5T8U2_HUMAN;tr|Q5T8U3|Q5T8U3_HUMAN	sp|P62424|RL7A_HUMAN;tr|Q5T8U2|Q5T8U2_HUMAN;tr|Q5T8U3|Q5T8U3_HUMAN	0.911089	0.903565	0.812429	0.922627	1.00953	822620000	753150000	778480000	787480000	656580000	749480000	680520000	632460000	726550000	662840000	17;10;9	17;10;9	17;10;9	sp|P62424|RL7A_HUMAN 60S ribosomal protein L7a OS=Homo sapiens GN=RPL7A PE=1 SV=2;tr|Q5T8U2|Q5T8U2_HUMAN 60S ribosomal protein L7a OS=Homo sapiens GN=RPL7A PE=1 SV=1;tr|Q5T8U3|Q5T8U3_HUMAN 60S ribosomal protein L7a (Fragment) OS=Homo sapiens GN=RPL7A PE=1	3	17	17	17	15	13	15	13	11	14	15	13	11	12	15	13	15	13	11	14	15	13	11	12	15	13	15	13	11
sp|Q13283|G3BP1_HUMAN;tr|E5RIZ6|E5RIZ6_HUMAN;tr|E5RH00|E5RH00_HUMAN;tr|E5RI46|E5RI46_HUMAN;tr|E5RIF8|E5RIF8_HUMAN;tr|E5RJU8|E5RJU8_HUMAN;tr|E5RH42|E5RH42_HUMAN	sp|Q13283|G3BP1_HUMAN	0.829622	0.956704	0.854994	1	0.84423	4378500	4686300	5909400	1	4129800	3632500	4483400	5052500	1	3486500	9;3;2;2;2;2;2	9;3;2;2;2;2;2	8;2;1;1;1;1;1	sp|Q13283|G3BP1_HUMAN Ras GTPase-activating protein-binding protein 1 OS=Homo sapiens GN=G3BP1 PE=1 SV=1	7	9	9	8	6	6	5	1	4	5	7	6	0	5	6	6	5	1	4	5	7	6	0	5	6	6	5	1	4
sp|Q92841|DDX17_HUMAN;tr|H3BLZ8|H3BLZ8_HUMAN	sp|Q92841|DDX17_HUMAN;tr|H3BLZ8|H3BLZ8_HUMAN	0.907514	0.949689	0.93735	0.844072	0.899177	62907000	55157000	62123000	55269000	51526000	57089000	52382000	58231000	46651000	46331000	31;31	31;31	23;23	sp|Q92841|DDX17_HUMAN Probable ATP-dependent RNA helicase DDX17 OS=Homo sapiens GN=DDX17 PE=1 SV=2;tr|H3BLZ8|H3BLZ8_HUMAN Probable ATP-dependent RNA helicase DDX17 OS=Homo sapiens GN=DDX17 PE=1 SV=1	2	31	31	23	23	18	20	13	17	14	17	15	14	16	23	18	20	13	17	14	17	15	14	16	17	14	15	11	13
sp|Q13573|SNW1_HUMAN;tr|G3V3A4|G3V3A4_HUMAN;tr|G3V4X8|G3V4X8_HUMAN;tr|G3V5R3|G3V5R3_HUMAN	sp|Q13573|SNW1_HUMAN;tr|G3V3A4|G3V3A4_HUMAN;tr|G3V4X8|G3V4X8_HUMAN	0.927437	0.82835	0.938824	0.849779	0.989857	5439400	5231000	6347300	7025000	5777500	5044700	4333100	5959000	5969700	5718900	17;14;13;6	17;14;13;6	17;14;13;6	sp|Q13573|SNW1_HUMAN SNW domain-containing protein 1 OS=Homo sapiens GN=SNW1 PE=1 SV=1;tr|G3V3A4|G3V3A4_HUMAN SNW domain-containing protein 1 OS=Homo sapiens GN=SNW1 PE=1 SV=1;tr|G3V4X8|G3V4X8_HUMAN SNW domain-containing protein 1 OS=Homo sapiens GN=SNW1 P	4	17	17	17	6	7	6	5	7	10	5	4	3	8	6	7	6	5	7	10	5	4	3	8	6	7	6	5	7
sp|O60508|PRP17_HUMAN;tr|Q5SRN1|Q5SRN1_HUMAN	sp|O60508|PRP17_HUMAN;tr|Q5SRN1|Q5SRN1_HUMAN	0.822973	1.0749	1.00615	1	1.23613	2335800	2697100	2797000	1	2674800	1922300	2899100	2814200	1	3306400	9;8	9;8	9;8	sp|O60508|PRP17_HUMAN Pre-mRNA-processing factor 17 OS=Homo sapiens GN=CDC40 PE=1 SV=1;tr|Q5SRN1|Q5SRN1_HUMAN Pre-mRNA-processing factor 17 OS=Homo sapiens GN=CDC40 PE=1 SV=1	2	9	9	9	3	5	4	1	2	4	3	4	1	9	3	5	4	1	2	4	3	4	1	9	3	5	4	1	2
sp|Q6PKG0|LARP1_HUMAN;tr|A0A0B4J210|A0A0B4J210_HUMAN;tr|E5RH50|E5RH50_HUMAN;tr|H0YC33|H0YC33_HUMAN;tr|H0YBW1|H0YBW1_HUMAN;sp|Q659C4|LAR1B_HUMAN;tr|H0YC73|H0YC73_HUMAN;tr|H0YAN4|H0YAN4_HUMAN;tr|H0YBM7|H0YBM7_HUMAN;tr|H0YBR8|H0YBR8_HUMAN;tr|H0YAX9|H0YAX9_HUMAN;tr|H0YBJ5|H0YBJ5_HUMAN;tr|E5RHK4|E5RHK4_HUMAN;tr|D6RJB0|D6RJB0_HUMAN	sp|Q6PKG0|LARP1_HUMAN;tr|A0A0B4J210|A0A0B4J210_HUMAN;tr|E5RH50|E5RH50_HUMAN	0.822598	1.28359	0.616355	1.17427e-07	0.820634	18940000	11016000	19664000	8515900	16235000	15580000	14140000	12120000	1	13323000	26;19;13;6;4;4;3;2;2;1;1;1;1;1	26;19;13;6;4;4;3;2;2;1;1;1;1;1	26;19;13;6;4;4;3;2;2;1;1;1;1;1	sp|Q6PKG0|LARP1_HUMAN La-related protein 1 OS=Homo sapiens GN=LARP1 PE=1 SV=2;tr|A0A0B4J210|A0A0B4J210_HUMAN La-related protein 1 (Fragment) OS=Homo sapiens GN=LARP1 PE=1 SV=2;tr|E5RH50|E5RH50_HUMAN La-related protein 1 (Fragment) OS=Homo sapiens GN=LARP1	14	26	26	26	15	10	17	5	11	12	13	8	1	11	15	10	17	5	11	12	13	8	1	11	15	10	17	5	11
sp|P51991|ROA3_HUMAN;tr|H7C1J8|H7C1J8_HUMAN	sp|P51991|ROA3_HUMAN	0.821779	0.74476	1.28829	1	0.852208	9109500	9789600	6083200	1	6351500	7486000	7290900	7836900	1	5412800	7;1	7;1	7;1	sp|P51991|ROA3_HUMAN Heterogeneous nuclear ribonucleoprotein A3 OS=Homo sapiens GN=HNRNPA3 PE=1 SV=2	2	7	7	7	3	7	5	1	5	3	6	6	1	4	3	7	5	1	5	3	6	6	1	4	3	7	5	1	5
sp|Q02878|RL6_HUMAN;tr|F8VZ45|F8VZ45_HUMAN;tr|U3KQR5|U3KQR5_HUMAN;tr|F8VR69|F8VR69_HUMAN;tr|F8VZA3|F8VZA3_HUMAN;tr|F8VWR1|F8VWR1_HUMAN;tr|F8VU16|F8VU16_HUMAN	sp|Q02878|RL6_HUMAN	0.973855	0.902338	0.815778	0.907846	0.909457	1139800000	1069200000	931050000	1062900000	1069000000	1110000000	964780000	759530000	964950000	972210000	22;9;9;5;4;4;4	22;9;9;5;4;4;4	22;9;9;5;4;4;4	sp|Q02878|RL6_HUMAN 60S ribosomal protein L6 OS=Homo sapiens GN=RPL6 PE=1 SV=3	7	22	22	22	16	13	17	18	16	20	17	14	16	13	16	13	17	18	16	20	17	14	16	13	16	13	17	18	16
sp|Q99459|CDC5L_HUMAN	sp|Q99459|CDC5L_HUMAN	0.759892	0.789863	1.06243	1.00629	0.922906	11075000	10102000	10507000	9047400	8669900	8415800	7979200	11163000	9104300	8001500	20	20	20	sp|Q99459|CDC5L_HUMAN Cell division cycle 5-like protein OS=Homo sapiens GN=CDC5L PE=1 SV=2	1	20	20	20	10	9	5	7	9	10	9	10	7	10	10	9	5	7	9	10	9	10	7	10	10	9	5	7	9
sp|Q9NVI7|ATD3A_HUMAN	sp|Q9NVI7|ATD3A_HUMAN	0.818213	1.02948	0.670665	0.769869	0.714442	14429000	12075000	14341000	12333000	14589000	11806000	12431000	9618000	9494800	10423000	20	20	1	sp|Q9NVI7|ATD3A_HUMAN ATPase family AAA domain-containing protein 3A OS=Homo sapiens GN=ATAD3A PE=1 SV=2	1	20	20	1	10	4	10	6	7	10	9	8	5	8	10	4	10	6	7	10	9	8	5	8	0	0	0	1	0
sp|P25398|RS12_HUMAN	sp|P25398|RS12_HUMAN	1.09611	0.724739	0.712652	0.86236	1.2899	12944000	12838000	11824000	5353100	5793700	14188000	9304200	8426400	4616300	7473300	5	5	5	sp|P25398|RS12_HUMAN 40S ribosomal protein S12 OS=Homo sapiens GN=RPS12 PE=1 SV=3	1	5	5	5	3	4	4	2	3	2	3	2	2	3	3	4	4	2	3	2	3	2	2	3	3	4	4	2	3
tr|E7EPB3|E7EPB3_HUMAN;sp|P50914|RL14_HUMAN	tr|E7EPB3|E7EPB3_HUMAN;sp|P50914|RL14_HUMAN	0.823556	1.04847	0.833227	0.969606	0.890594	288760000	169390000	172450000	176680000	245600000	237810000	177600000	143690000	171310000	218730000	5;5	5;5	5;5	tr|E7EPB3|E7EPB3_HUMAN 60S ribosomal protein L14 OS=Homo sapiens GN=RPL14 PE=1 SV=1;sp|P50914|RL14_HUMAN 60S ribosomal protein L14 OS=Homo sapiens GN=RPL14 PE=1 SV=4	2	5	5	5	4	4	3	4	3	5	5	4	3	4	4	4	3	4	3	5	5	4	3	4	4	4	3	4	3
sp|Q14694|UBP10_HUMAN;tr|J3KT19|J3KT19_HUMAN;tr|H3BQP1|H3BQP1_HUMAN;tr|H3BNS8|H3BNS8_HUMAN;tr|H3BQC6|H3BQC6_HUMAN;tr|H3BNA1|H3BNA1_HUMAN	sp|Q14694|UBP10_HUMAN	0.809005	0.981252	3.21958e-07	1	0.836924	3782300	2587000	3106000	1	4117100	3059900	2538500	1	1	3445700	9;3;2;1;1;1	9;3;2;1;1;1	9;3;2;1;1;1	sp|Q14694|UBP10_HUMAN Ubiquitin carboxyl-terminal hydrolase 10 OS=Homo sapiens GN=USP10 PE=1 SV=2	6	9	9	9	5	4	7	0	6	6	5	1	0	5	5	4	7	0	6	6	5	1	0	5	5	4	7	0	6
tr|F5GWX5|F5GWX5_HUMAN;sp|Q14839|CHD4_HUMAN;tr|A0A0C4DGG9|A0A0C4DGG9_HUMAN;sp|Q8TDI0|CHD5_HUMAN;tr|K7EMY3|K7EMY3_HUMAN;tr|I3L229|I3L229_HUMAN;tr|H7C3H7|H7C3H7_HUMAN;tr|F5H6N4|F5H6N4_HUMAN;tr|H7C0J3|H7C0J3_HUMAN;tr|F2Z2R5|F2Z2R5_HUMAN	tr|F5GWX5|F5GWX5_HUMAN;sp|Q14839|CHD4_HUMAN;tr|A0A0C4DGG9|A0A0C4DGG9_HUMAN	0.806896	0.671194	0.868165	1	0.856725	6682400	4557100	3185800	1	4715400	5392000	3058700	2765800	1	4039800	25;25;25;9;7;2;2;2;2;2	25;25;25;9;7;2;2;2;2;2	17;17;17;3;3;0;0;2;0;1	tr|F5GWX5|F5GWX5_HUMAN Chromodomain-helicase-DNA-binding protein 4 OS=Homo sapiens GN=CHD4 PE=1 SV=1;sp|Q14839|CHD4_HUMAN Chromodomain-helicase-DNA-binding protein 4 OS=Homo sapiens GN=CHD4 PE=1 SV=2;tr|A0A0C4DGG9|A0A0C4DGG9_HUMAN Chromodomain-helicase-DNA	10	25	25	17	10	9	9	1	6	13	5	5	1	5	10	9	9	1	6	13	5	5	1	5	6	5	5	1	4
sp|B5ME19|EIFCL_HUMAN;sp|Q99613|EIF3C_HUMAN;tr|H3BPE4|H3BPE4_HUMAN	sp|B5ME19|EIFCL_HUMAN;sp|Q99613|EIF3C_HUMAN	0.805821	1.60953	9.1954e-07	1	1	749720	879450	1087500	1	1	604140	1415500	1	1	1	5;5;1	5;5;1	5;5;1	sp|B5ME19|EIFCL_HUMAN Eukaryotic translation initiation factor 3 subunit C-like protein OS=Homo sapiens GN=EIF3CL PE=3 SV=1;sp|Q99613|EIF3C_HUMAN Eukaryotic translation initiation factor 3 subunit C OS=Homo sapiens GN=EIF3C PE=1 SV=1	3	5	5	5	2	3	3	0	2	2	2	1	0	2	2	3	3	0	2	2	2	1	0	2	2	3	3	0	2
sp|O94776|MTA2_HUMAN	sp|O94776|MTA2_HUMAN	0.802964	0.730538	1	1393800	1	1747900	2177300	1	1	1	1403500	1590600	1	1393800	1	8	8	7	sp|O94776|MTA2_HUMAN Metastasis-associated protein MTA2 OS=Homo sapiens GN=MTA2 PE=1 SV=1	1	8	8	7	3	5	2	1	1	3	2	1	2	3	3	5	2	1	1	3	2	1	2	3	2	4	2	0	0
sp|Q5JTH9|RRP12_HUMAN;tr|A0A087X1U8|A0A087X1U8_HUMAN;tr|A0A087X0G0|A0A087X0G0_HUMAN;tr|H7C1M8|H7C1M8_HUMAN	sp|Q5JTH9|RRP12_HUMAN	0.802141	0.903396	0.622107	0.747672	1.11846	29794000	19699000	24409000	14390000	20547000	23899000	17796000	15185000	10759000	22981000	30;5;2;2	30;5;2;2	30;5;2;2	sp|Q5JTH9|RRP12_HUMAN RRP12-like protein OS=Homo sapiens GN=RRP12 PE=1 SV=2	4	30	30	30	15	17	18	7	13	18	15	12	6	12	15	17	18	7	13	18	15	12	6	12	15	17	18	7	13
sp|Q8TDN6|BRX1_HUMAN	sp|Q8TDN6|BRX1_HUMAN	1.01372	0.941963	0.762128	0.891556	0.937119	507170000	878570000	741280000	804380000	481230000	514130000	827580000	564950000	717150000	450970000	29	29	29	sp|Q8TDN6|BRX1_HUMAN Ribosome biogenesis protein BRX1 homolog OS=Homo sapiens GN=BRIX1 PE=1 SV=2	1	29	29	29	20	22	18	20	22	17	23	23	16	21	20	22	18	20	22	17	23	23	16	21	20	22	18	20	22
sp|Q9H6R0|DHX33_HUMAN;tr|I3L1L6|I3L1L6_HUMAN;tr|Q5JXI3|Q5JXI3_HUMAN;tr|I3L0M5|I3L0M5_HUMAN	sp|Q9H6R0|DHX33_HUMAN;tr|I3L1L6|I3L1L6_HUMAN	0.79773	1	1	1	1959800	1982500	1	1	1	1	1581500	1	1	1	1959800	8;5;2;1	8;5;2;1	8;5;2;1	sp|Q9H6R0|DHX33_HUMAN Putative ATP-dependent RNA helicase DHX33 OS=Homo sapiens GN=DHX33 PE=1 SV=2;tr|I3L1L6|I3L1L6_HUMAN Putative ATP-dependent RNA helicase DHX33 (Fragment) OS=Homo sapiens GN=DHX33 PE=1 SV=1	4	8	8	8	3	0	2	0	0	4	0	1	0	5	3	0	2	0	0	4	0	1	0	5	3	0	2	0	0
tr|K7EMM8|K7EMM8_HUMAN;sp|Q49A26|GLYR1_HUMAN;tr|K7EPU6|K7EPU6_HUMAN;tr|K7EQB2|K7EQB2_HUMAN	tr|K7EMM8|K7EMM8_HUMAN;sp|Q49A26|GLYR1_HUMAN	0.79674	0.541922	0.736046	1	1954600	2577000	3677100	2836100	1	1	2053200	1992700	2087500	1	1954600	5;5;1;1	5;5;1;1	5;5;1;1	tr|K7EMM8|K7EMM8_HUMAN Putative oxidoreductase GLYR1 (Fragment) OS=Homo sapiens GN=GLYR1 PE=1 SV=2;sp|Q49A26|GLYR1_HUMAN Putative oxidoreductase GLYR1 OS=Homo sapiens GN=GLYR1 PE=1 SV=3	4	5	5	5	5	2	5	0	1	3	4	4	1	3	5	2	5	0	1	3	4	4	1	3	5	2	5	0	1
sp|Q9H7E9|CH033_HUMAN	sp|Q9H7E9|CH033_HUMAN	0.796651	2536400	0.883659	1	0.863452	3027800	1	2702400	1	2440900	2412100	2536400	2388000	1	2107600	6	6	6	sp|Q9H7E9|CH033_HUMAN UPF0488 protein C8orf33 OS=Homo sapiens GN=C8orf33 PE=1 SV=1	1	6	6	6	3	1	5	1	2	2	4	3	1	3	3	1	5	1	2	2	4	3	1	3	3	1	5	1	2
sp|P68363|TBA1B_HUMAN;tr|F8VVB9|F8VVB9_HUMAN;tr|F8VQQ4|F8VQQ4_HUMAN;tr|F8VRZ4|F8VRZ4_HUMAN;tr|F8VS66|F8VS66_HUMAN;tr|F8VX09|F8VX09_HUMAN;tr|F8VWV9|F8VWV9_HUMAN;tr|C9JDS9|C9JDS9_HUMAN;tr|C9K0S6|C9K0S6_HUMAN;tr|C9JDL2|C9JDL2_HUMAN;sp|A6NHL2|TBAL3_HUMAN;tr|F8VRK0|F8VRK0_HUMAN;tr|F8VXZ7|F8VXZ7_HUMAN;tr|F8W0F6|F8W0F6_HUMAN;sp|Q9H853|TBA4B_HUMAN	sp|P68363|TBA1B_HUMAN;tr|F8VVB9|F8VVB9_HUMAN	0.793743	0.693249	0.882143	1.89237	2.77354	35417000	76303000	38886000	12478000	17491000	28112000	52897000	34303000	23613000	48512000	18;10;7;6;6;5;5;5;3;3;3;2;1;1;1	18;10;7;6;6;5;5;5;3;3;3;2;1;1;1	0;0;0;0;0;0;0;0;0;0;0;0;0;0;0	sp|P68363|TBA1B_HUMAN Tubulin alpha-1B chain OS=Homo sapiens GN=TUBA1B PE=1 SV=1;tr|F8VVB9|F8VVB9_HUMAN Tubulin alpha-1B chain (Fragment) OS=Homo sapiens GN=TUBA1B PE=1 SV=5	15	18	18	0	11	13	12	3	7	8	11	11	5	12	11	13	12	3	7	8	11	11	5	12	0	0	0	0	0
sp|Q9ULX6|AKP8L_HUMAN;tr|D6RAD4|D6RAD4_HUMAN	sp|Q9ULX6|AKP8L_HUMAN	0.792456	0.856416	1.07248	1	1	2333000	2595000	2036500	1	1	1848800	2222400	2184100	1	1	4;1	4;1	4;1	sp|Q9ULX6|AKP8L_HUMAN A-kinase anchor protein 8-like OS=Homo sapiens GN=AKAP8L PE=1 SV=3	2	4	4	4	3	3	3	1	1	3	3	3	0	1	3	3	3	1	1	3	3	3	0	1	3	3	3	1	1
sp|Q9BVP2|GNL3_HUMAN;tr|C9JYH9|C9JYH9_HUMAN;tr|C9JZT7|C9JZT7_HUMAN;tr|B4DMU5|B4DMU5_HUMAN	sp|Q9BVP2|GNL3_HUMAN	0.933736	0.816847	0.85593	0.90843	0.997484	32461000	30379000	45360000	33024000	31791000	30310000	24815000	38825000	30000000	31711000	16;2;2;2	16;2;2;2	16;2;2;2	sp|Q9BVP2|GNL3_HUMAN Guanine nucleotide-binding protein-like 3 OS=Homo sapiens GN=GNL3 PE=1 SV=2	4	16	16	16	11	10	8	8	10	7	9	8	8	13	11	10	8	8	10	7	9	8	8	13	11	10	8	8	10
sp|Q6P2Q9|PRP8_HUMAN;tr|I3L0J9|I3L0J9_HUMAN;tr|I3L3Z8|I3L3Z8_HUMAN;tr|I3L1T8|I3L1T8_HUMAN	sp|Q6P2Q9|PRP8_HUMAN	0.727823	1.00971	1.04687	0.772081	0.961238	45610000	35742000	32300000	31169000	45508000	33196000	36089000	33814000	24065000	43744000	74;24;9;2	74;24;9;2	74;24;9;2	sp|Q6P2Q9|PRP8_HUMAN Pre-mRNA-processing-splicing factor 8 OS=Homo sapiens GN=PRPF8 PE=1 SV=2	4	74	74	74	43	37	29	16	32	31	35	32	13	38	43	37	29	16	32	31	35	32	13	38	43	37	29	16	32
sp|P39019|RS19_HUMAN;tr|A0A075B6E2|A0A075B6E2_HUMAN;tr|M0R2L9|M0R2L9_HUMAN;tr|M0QXK4|M0QXK4_HUMAN;tr|M0QYF7|M0QYF7_HUMAN;tr|M0R140|M0R140_HUMAN	sp|P39019|RS19_HUMAN;tr|A0A075B6E2|A0A075B6E2_HUMAN	0.780303	0.941144	0.647675	0.965375	0.694212	53642000	53911000	72226000	21776000	37611000	41857000	50738000	46779000	21022000	26110000	12;6;5;5;5;5	12;6;5;5;5;5	12;6;5;5;5;5	sp|P39019|RS19_HUMAN 40S ribosomal protein S19 OS=Homo sapiens GN=RPS19 PE=1 SV=2;tr|A0A075B6E2|A0A075B6E2_HUMAN 40S ribosomal protein S19 OS=Homo sapiens GN=RPS19 PE=1 SV=1	6	12	12	12	9	10	7	4	7	7	8	6	5	8	9	10	7	4	7	7	8	6	5	8	9	10	7	4	7
tr|H7BXY3|H7BXY3_HUMAN;sp|Q7L2E3|DHX30_HUMAN	tr|H7BXY3|H7BXY3_HUMAN;sp|Q7L2E3|DHX30_HUMAN	0.77939	1.25913	0.89451	0.294149	1.01942	22116000	13943000	18305000	10973000	12613000	17237000	17556000	16374000	3227700	12858000	34;34	34;34	34;34	tr|H7BXY3|H7BXY3_HUMAN Putative ATP-dependent RNA helicase DHX30 OS=Homo sapiens GN=DHX30 PE=1 SV=1;sp|Q7L2E3|DHX30_HUMAN Putative ATP-dependent RNA helicase DHX30 OS=Homo sapiens GN=DHX30 PE=1 SV=1	2	34	34	34	26	17	22	8	12	17	16	16	4	15	26	17	22	8	12	17	16	16	4	15	26	17	22	8	12
tr|A0A0B4J2E5|A0A0B4J2E5_HUMAN;sp|Q15269|PWP2_HUMAN;tr|C9J544|C9J544_HUMAN;tr|A0A096LPI6|A0A096LPI6_HUMAN	tr|A0A0B4J2E5|A0A0B4J2E5_HUMAN;sp|Q15269|PWP2_HUMAN	0.712493	0.753916	1.18356	1.06137	0.824084	6113600	5266500	4606000	7101100	8582500	4355900	3970500	5451500	7536900	7072700	9;9;2;1	9;9;2;1	9;9;2;1	tr|A0A0B4J2E5|A0A0B4J2E5_HUMAN Uncharacterized protein OS=Homo sapiens PE=1 SV=1;sp|Q15269|PWP2_HUMAN Periodic tryptophan protein 2 homolog OS=Homo sapiens GN=PWP2 PE=1 SV=2	4	9	9	9	4	3	3	3	5	5	5	5	5	5	4	3	3	3	5	5	5	5	5	5	4	3	3	3	5
sp|Q7KZF4|SND1_HUMAN;tr|H7C597|H7C597_HUMAN	sp|Q7KZF4|SND1_HUMAN	0.77601	0.798582	7.5188e-07	1	1	1408100	1142800	1330000	1	1	1092700	912620	1	1	1	6;2	6;2	6;2	sp|Q7KZF4|SND1_HUMAN Staphylococcal nuclease domain-containing protein 1 OS=Homo sapiens GN=SND1 PE=1 SV=1	2	6	6	6	3	2	5	0	1	2	3	0	0	0	3	2	5	0	1	2	3	0	0	0	3	2	5	0	1
sp|O75688|PPM1B_HUMAN;tr|C9JIR6|C9JIR6_HUMAN;tr|B8ZZF0|B8ZZF0_HUMAN;tr|E9PKB5|E9PKB5_HUMAN;sp|P35813|PPM1A_HUMAN	sp|O75688|PPM1B_HUMAN;tr|C9JIR6|C9JIR6_HUMAN;tr|B8ZZF0|B8ZZF0_HUMAN	0.773658	1.18952	1.39307	0.684253	0.91348	4058900	3041300	3328400	4171700	4390900	3140200	3617700	4636700	2854500	4011000	8;7;6;1;1	8;7;6;1;1	8;7;6;1;1	sp|O75688|PPM1B_HUMAN Protein phosphatase 1B OS=Homo sapiens GN=PPM1B PE=1 SV=1;tr|C9JIR6|C9JIR6_HUMAN Protein phosphatase 1B (Fragment) OS=Homo sapiens GN=PPM1B PE=1 SV=1;tr|B8ZZF0|B8ZZF0_HUMAN Protein phosphatase 1B (Fragment) OS=Homo sapiens GN=PPM1B PE	5	8	8	8	8	3	4	3	4	3	4	7	2	3	8	3	4	3	4	3	4	7	2	3	8	3	4	3	4
sp|P36578|RL4_HUMAN;tr|H3BM89|H3BM89_HUMAN;tr|H3BTP7|H3BTP7_HUMAN;tr|H3BU31|H3BU31_HUMAN	sp|P36578|RL4_HUMAN;tr|H3BM89|H3BM89_HUMAN	0.764507	0.983513	0.842509	0.905106	1.05498	1447600000	1049300000	1316900000	1175000000	971300000	1106700000	1032000000	1109500000	1063500000	1024700000	24;17;11;8	24;17;11;8	24;17;11;8	sp|P36578|RL4_HUMAN 60S ribosomal protein L4 OS=Homo sapiens GN=RPL4 PE=1 SV=5;tr|H3BM89|H3BM89_HUMAN 60S ribosomal protein L4 OS=Homo sapiens GN=RPL4 PE=1 SV=1	4	24	24	24	19	19	19	22	17	18	17	17	19	19	19	19	19	22	17	18	17	17	19	19	19	19	19	22	17
sp|P11940|PABP1_HUMAN;tr|E7EQV3|E7EQV3_HUMAN;tr|A0A087WTT1|A0A087WTT1_HUMAN;tr|E7ERJ7|E7ERJ7_HUMAN;tr|H0YAR2|H0YAR2_HUMAN;sp|Q9H361|PABP3_HUMAN;tr|H0YBN4|H0YBN4_HUMAN;sp|Q4VXU2|PAP1L_HUMAN;tr|H0YB86|H0YB86_HUMAN;tr|E5RGH3|E5RGH3_HUMAN;tr|E5RJB9|E5RJB9_HUMAN;tr|H0YAP2|H0YAP2_HUMAN;tr|E5RH24|E5RH24_HUMAN;tr|H0YB75|H0YB75_HUMAN;tr|H0YAS6|H0YAS6_HUMAN;tr|H0YAS7|H0YAS7_HUMAN;tr|E5RHG7|E5RHG7_HUMAN;tr|…	sp|P11940|PABP1_HUMAN;tr|E7EQV3|E7EQV3_HUMAN;tr|A0A087WTT1|A0A087WTT1_HUMAN;tr|E7ERJ7|E7ERJ7_HUMAN;tr|H0YAR2|H0YAR2_HUMAN;sp|Q9H361|PABP3_HUMAN	0.874204	0.947293	0.77402	1.01948	0.883591	157080000	132050000	145190000	119620000	152480000	137320000	125090000	112380000	121950000	134730000	31;30;30;29;19;16;13;7;7;6;6;6;5;5;5;4;3;3;1;1;1;1;1	31;30;30;29;19;16;13;7;7;6;6;6;5;5;5;4;3;3;1;1;1;1;1	20;19;19;19;12;13;6;4;4;2;2;6;2;5;5;4;1;3;1;1;1;1;1	sp|P11940|PABP1_HUMAN Polyadenylate-binding protein 1 OS=Homo sapiens GN=PABPC1 PE=1 SV=2;tr|E7EQV3|E7EQV3_HUMAN Polyadenylate-binding protein OS=Homo sapiens GN=PABPC1 PE=1 SV=1;tr|A0A087WTT1|A0A087WTT1_HUMAN Polyadenylate-binding protein OS=Homo sapiens	23	31	31	20	21	21	22	18	21	22	22	17	13	21	21	21	22	18	21	22	22	17	13	21	12	13	14	12	14
sp|Q12906|ILF3_HUMAN;tr|K7EKJ9|K7EKJ9_HUMAN;tr|K7ER69|K7ER69_HUMAN;tr|K7EQR9|K7EQR9_HUMAN;tr|K7ERM6|K7ERM6_HUMAN;tr|K7ENK6|K7ENK6_HUMAN;tr|K7EM82|K7EM82_HUMAN;tr|K7EJ09|K7EJ09_HUMAN;tr|K7EPG3|K7EPG3_HUMAN;tr|K7EQ75|K7EQ75_HUMAN	sp|Q12906|ILF3_HUMAN	0.907933	0.966574	0.768434	0.860378	0.929303	21115000	18040000	17563000	15764000	14654000	19171000	17437000	13496000	13563000	13618000	21;7;4;4;3;3;3;3;1;1	21;7;4;4;3;3;3;3;1;1	16;5;3;3;3;3;3;3;0;1	sp|Q12906|ILF3_HUMAN Interleukin enhancer-binding factor 3 OS=Homo sapiens GN=ILF3 PE=1 SV=3	10	21	21	16	12	16	14	9	7	7	10	11	6	12	12	16	14	9	7	7	10	11	6	12	10	11	10	7	6
sp|P49792|RBP2_HUMAN;sp|A6NKT7|RGPD3_HUMAN;tr|J3KNE0|J3KNE0_HUMAN;tr|J3KQ37|J3KQ37_HUMAN;sp|P0DJD0|RGPD1_HUMAN;tr|F8VYC4|F8VYC4_HUMAN;sp|P0DJD1|RGPD2_HUMAN;sp|Q7Z3J3|RGPD4_HUMAN;sp|Q99666|RGPD5_HUMAN;sp|O14715|RGPD8_HUMAN;tr|F8W705|F8W705_HUMAN;tr|F8WBP7|F8WBP7_HUMAN	sp|P49792|RBP2_HUMAN;sp|A6NKT7|RGPD3_HUMAN;tr|J3KNE0|J3KNE0_HUMAN	0.762565	3.99728e-07	2331000	1	3.81432e-07	2670200	2501700	1	1	2621700	2036200	1	2331000	1	1	8;5;5;3;3;3;3;3;3;3;2;1	8;5;5;3;3;3;3;3;3;3;2;1	8;5;5;3;3;3;3;3;3;3;2;1	sp|P49792|RBP2_HUMAN E3 SUMO-protein ligase RanBP2 OS=Homo sapiens GN=RANBP2 PE=1 SV=2;sp|A6NKT7|RGPD3_HUMAN RanBP2-like and GRIP domain-containing protein 3 OS=Homo sapiens GN=RGPD3 PE=3 SV=2;tr|J3KNE0|J3KNE0_HUMAN RanBP2-like and GRIP domain-containing p	12	8	8	8	7	4	1	0	3	6	1	2	1	1	7	4	1	0	3	6	1	2	1	1	7	4	1	0	3
sp|P49207|RL34_HUMAN	sp|P49207|RL34_HUMAN	0.754825	0.997626	0.861522	0.851159	1.05261	199980000	143190000	154320000	163060000	121080000	150950000	142850000	132950000	138790000	127450000	6	6	6	sp|P49207|RL34_HUMAN 60S ribosomal protein L34 OS=Homo sapiens GN=RPL34 PE=1 SV=3	1	6	6	6	5	4	5	6	4	4	6	4	3	4	5	4	5	6	4	4	6	4	3	4	5	4	5	6	4
tr|B4DY09|B4DY09_HUMAN;sp|Q12905|ILF2_HUMAN;tr|X6R6Z1|X6R6Z1_HUMAN;tr|A0A0A0MRL0|A0A0A0MRL0_HUMAN	tr|B4DY09|B4DY09_HUMAN;sp|Q12905|ILF2_HUMAN	0.919782	0.703338	0.867709	1.12242	0.86311	19310000	20852000	17008000	11975000	15107000	17761000	14666000	14758000	13441000	13039000	11;11;4;3	11;11;4;3	11;11;4;3	tr|B4DY09|B4DY09_HUMAN Interleukin enhancer-binding factor 2 OS=Homo sapiens GN=ILF2 PE=1 SV=1;sp|Q12905|ILF2_HUMAN Interleukin enhancer-binding factor 2 OS=Homo sapiens GN=ILF2 PE=1 SV=2	4	11	11	11	8	7	8	5	7	8	6	8	4	6	8	7	8	5	7	8	6	8	4	6	8	7	8	5	7
sp|Q5BKZ1|ZN326_HUMAN;tr|A0A0A0MRN4|A0A0A0MRN4_HUMAN;tr|E2QRN4|E2QRN4_HUMAN	sp|Q5BKZ1|ZN326_HUMAN;tr|A0A0A0MRN4|A0A0A0MRN4_HUMAN	0.724191	0.755935	0.83054	1.03852	1.22681	10388000	8479700	9592800	5996900	5416000	7522900	6410100	7967200	6227900	6644400	13;7;1	13;7;1	13;7;1	sp|Q5BKZ1|ZN326_HUMAN DBIRD complex subunit ZNF326 OS=Homo sapiens GN=ZNF326 PE=1 SV=2;tr|A0A0A0MRN4|A0A0A0MRN4_HUMAN DBIRD complex subunit ZNF326 OS=Homo sapiens GN=ZNF326 PE=1 SV=1	3	13	13	13	7	7	7	4	3	6	6	5	3	4	7	7	7	4	3	6	6	5	3	4	7	7	7	4	3
sp|O00425|IF2B3_HUMAN;tr|F8WD15|F8WD15_HUMAN	sp|O00425|IF2B3_HUMAN	0.757782	0.898696	0.695421	2897000	0.986927	7540300	7164600	10461000	1	5652800	5713900	6438800	7274800	2897000	5578900	15;3	15;3	13;3	sp|O00425|IF2B3_HUMAN Insulin-like growth factor 2 mRNA-binding protein 3 OS=Homo sapiens GN=IGF2BP3 PE=1 SV=2	2	15	15	13	8	8	12	1	5	7	7	6	2	7	8	8	12	1	5	7	7	6	2	7	6	6	10	1	3
sp|O43143|DHX15_HUMAN	sp|O43143|DHX15_HUMAN	0.829304	0.862592	0.893677	0.805276	0.951084	94466000	76291000	84281000	70695000	78093000	78341000	65808000	75320000	56929000	74273000	36	36	35	sp|O43143|DHX15_HUMAN Pre-mRNA-splicing factor ATP-dependent RNA helicase DHX15 OS=Homo sapiens GN=DHX15 PE=1 SV=2	1	36	36	35	27	21	25	17	25	22	23	23	20	24	27	21	25	17	25	22	23	23	20	24	26	20	24	17	24
sp|Q9UKN8|TF3C4_HUMAN;tr|F2Z356|F2Z356_HUMAN	sp|Q9UKN8|TF3C4_HUMAN	0.753829	0.856503	7.15973e-07	1	1400500	1925900	2032800	1396700	1	1	1451800	1741100	1	1	1400500	6;1	6;1	6;1	sp|Q9UKN8|TF3C4_HUMAN General transcription factor 3C polypeptide 4 OS=Homo sapiens GN=GTF3C4 PE=1 SV=2	2	6	6	6	4	3	3	0	1	3	3	1	0	2	4	3	3	0	1	3	3	1	0	2	4	3	3	0	1
sp|P23396|RS3_HUMAN;tr|F2Z2S8|F2Z2S8_HUMAN;tr|H0YCJ7|H0YCJ7_HUMAN;tr|H0YF32|H0YF32_HUMAN;tr|E9PQ96|E9PQ96_HUMAN;tr|E9PJH4|E9PJH4_HUMAN;tr|E9PK82|E9PK82_HUMAN;tr|C9JNE2|C9JNE2_HUMAN;tr|E9PSF4|E9PSF4_HUMAN;tr|E9PQX2|E9PQX2_HUMAN;tr|H0YES8|H0YES8_HUMAN	sp|P23396|RS3_HUMAN	0.80968	0.882602	0.760314	1.05741	0.844419	86050000	96790000	99981000	43565000	80556000	69673000	85427000	76017000	46066000	68023000	28;10;10;8;7;7;7;6;5;3;1	28;10;10;8;7;7;7;6;5;3;1	9;1;1;1;0;0;0;4;0;0;0	sp|P23396|RS3_HUMAN 40S ribosomal protein S3 OS=Homo sapiens GN=RPS3 PE=1 SV=2	11	28	28	9	21	21	18	12	18	24	19	20	14	17	21	21	18	12	18	24	19	20	14	17	6	6	5	4	5
tr|X6R700|X6R700_HUMAN;sp|Q9Y3Y2|CHTOP_HUMAN;tr|A0A087X1B7|A0A087X1B7_HUMAN;tr|Q5T7Y7|Q5T7Y7_HUMAN	tr|X6R700|X6R700_HUMAN;sp|Q9Y3Y2|CHTOP_HUMAN;tr|A0A087X1B7|A0A087X1B7_HUMAN	0.748782	1.21122	1.20861	1	1	1723600	1229500	2461500	1	1	1290600	1489200	2975000	1	1	3;3;2;1	3;3;2;1	3;3;2;1	tr|X6R700|X6R700_HUMAN Chromatin target of PRMT1 protein OS=Homo sapiens GN=CHTOP PE=1 SV=1;sp|Q9Y3Y2|CHTOP_HUMAN Chromatin target of PRMT1 protein OS=Homo sapiens GN=CHTOP PE=1 SV=2;tr|A0A087X1B7|A0A087X1B7_HUMAN Chromatin target of PRMT1 protein OS=Homo	4	3	3	3	2	3	2	0	0	3	2	3	0	1	2	3	2	0	0	3	2	3	0	1	2	3	2	0	0
sp|P11021|GRP78_HUMAN	sp|P11021|GRP78_HUMAN	0.745948	0.752622	1.33296	1	0.818864	3553600	4395300	2932500	1	3728700	2650800	3308000	3908900	1	3053300	12	11	11	sp|P11021|GRP78_HUMAN 78 kDa glucose-regulated protein OS=Homo sapiens GN=HSPA5 PE=1 SV=2	1	12	11	11	9	9	8	2	4	8	9	6	2	6	8	8	7	1	3	7	8	5	1	5	8	8	7	1	3
sp|P60866|RS20_HUMAN;tr|G3XAN0|G3XAN0_HUMAN;tr|E5RJX2|E5RJX2_HUMAN;tr|E5RIP1|E5RIP1_HUMAN	sp|P60866|RS20_HUMAN;tr|G3XAN0|G3XAN0_HUMAN	0.744008	0.803894	0.601874	0.840052	1.17883	18860000	19622000	15527000	5750000	10300000	14032000	15774000	9345300	4830300	12142000	3;2;1;1	3;2;1;1	3;2;1;1	sp|P60866|RS20_HUMAN 40S ribosomal protein S20 OS=Homo sapiens GN=RPS20 PE=1 SV=1;tr|G3XAN0|G3XAN0_HUMAN 40S ribosomal protein S20 OS=Homo sapiens GN=RPS20 PE=1 SV=1	4	3	3	3	3	3	3	2	2	3	3	2	2	2	3	3	3	2	2	3	3	2	2	2	3	3	3	2	2
tr|A0A087WXM6|A0A087WXM6_HUMAN;tr|J3QQT2|J3QQT2_HUMAN;tr|J3KRX5|J3KRX5_HUMAN;sp|P18621|RL17_HUMAN;tr|A0A0A6YYL6|A0A0A6YYL6_HUMAN;tr|J3QLC8|J3QLC8_HUMAN;tr|A0A0A0MRF8|A0A0A0MRF8_HUMAN;tr|J3KRB3|J3KRB3_HUMAN;tr|A0A087WWH0|A0A087WWH0_HUMAN;tr|J3QS96|J3QS96_HUMAN;tr|A0A087WY81|A0A087WY81_HUMAN;tr|J3KSJ0|J3KSJ0_HUMAN	tr|A0A087WXM6|A0A087WXM6_HUMAN;tr|J3QQT2|J3QQT2_HUMAN;tr|J3KRX5|J3KRX5_HUMAN;sp|P18621|RL17_HUMAN;tr|A0A0A6YYL6|A0A0A6YYL6_HUMAN;tr|J3QLC8|J3QLC8_HUMAN;tr|A0A0A0MRF8|A0A0A0MRF8_HUMAN;tr|J3KRB3|J3KRB3_HUMAN;tr|A0A087WWH0|A0A087WWH0_HUMAN;tr|J3QS96|J3QS96_HUMAN	0.862145	0.943259	0.721899	0.96644	0.811197	48261000	80894000	84854000	29887000	60550000	41608000	76304000	61256000	28884000	49118000	9;9;9;9;9;8;8;6;6;6;4;1	9;9;9;9;9;8;8;6;6;6;4;1	9;9;9;9;9;8;8;6;6;6;4;1	tr|A0A087WXM6|A0A087WXM6_HUMAN 60S ribosomal protein L17 (Fragment) OS=Homo sapiens GN=RPL17 PE=1 SV=1;tr|J3QQT2|J3QQT2_HUMAN 60S ribosomal protein L17 (Fragment) OS=Homo sapiens GN=RPL17 PE=1 SV=1;tr|J3KRX5|J3KRX5_HUMAN 60S ribosomal protein L17 (Fragment	12	9	9	9	7	7	9	6	6	6	7	6	6	6	7	7	9	6	6	6	7	6	6	6	7	7	9	6	6
tr|F8W6I7|F8W6I7_HUMAN;sp|P09651|ROA1_HUMAN;tr|F8VTQ5|F8VTQ5_HUMAN;sp|Q32P51|RA1L2_HUMAN;tr|F8VZ49|F8VZ49_HUMAN;tr|H0YH80|H0YH80_HUMAN;tr|F8W646|F8W646_HUMAN;tr|F8VYN5|F8VYN5_HUMAN	tr|F8W6I7|F8W6I7_HUMAN;sp|P09651|ROA1_HUMAN;tr|F8VTQ5|F8VTQ5_HUMAN;sp|Q32P51|RA1L2_HUMAN;tr|F8VZ49|F8VZ49_HUMAN	0.742459	0.997757	1.86062	0.423698	1.39456	9826800	8605600	8172000	8394900	7708500	7296000	8586300	15205000	3556900	10750000	13;13;9;9;8;6;5;4	12;12;8;8;7;6;5;3	12;12;8;8;7;6;5;3	tr|F8W6I7|F8W6I7_HUMAN Heterogeneous nuclear ribonucleoprotein A1 OS=Homo sapiens GN=HNRNPA1 PE=1 SV=2;sp|P09651|ROA1_HUMAN Heterogeneous nuclear ribonucleoprotein A1 OS=Homo sapiens GN=HNRNPA1 PE=1 SV=5;tr|F8VTQ5|F8VTQ5_HUMAN Heterogeneous nuclear ribonuc	8	13	12	12	7	6	7	6	5	6	7	10	2	5	7	6	7	6	5	6	7	9	2	5	7	6	7	6	5
sp|Q96KR1|ZFR_HUMAN	sp|Q96KR1|ZFR_HUMAN	0.735883	0.792833	1.08295	5.10048e-07	0.967771	5004600	3432500	2929400	1960600	1973400	3682800	2721400	3172400	1	1909800	10	10	10	sp|Q96KR1|ZFR_HUMAN Zinc finger RNA-binding protein OS=Homo sapiens GN=ZFR PE=1 SV=2	1	10	10	10	9	6	5	2	2	5	4	4	1	2	9	6	5	2	2	5	4	4	1	2	9	6	5	2	2
sp|Q15029|U5S1_HUMAN;tr|K7EP67|K7EP67_HUMAN;tr|K7EJ74|K7EJ74_HUMAN	sp|Q15029|U5S1_HUMAN	0.902823	0.785933	0.873531	0.741458	0.935783	32127000	39128000	39915000	40566000	35894000	29005000	30752000	34867000	30078000	33589000	31;10;5	31;10;5	30;9;4	sp|Q15029|U5S1_HUMAN 116 kDa U5 small nuclear ribonucleoprotein component OS=Homo sapiens GN=EFTUD2 PE=1 SV=1	3	31	31	30	18	20	21	19	17	16	19	19	14	18	18	20	21	19	17	16	19	19	14	18	18	20	21	19	17
tr|C9JXB8|C9JXB8_HUMAN;tr|C9JNW5|C9JNW5_HUMAN;sp|P83731|RL24_HUMAN	tr|C9JXB8|C9JXB8_HUMAN;tr|C9JNW5|C9JNW5_HUMAN;sp|P83731|RL24_HUMAN	0.840496	0.862332	0.80778	0.77174	0.909589	23291000	20702000	29331000	21677000	23747000	19576000	17852000	23693000	16729000	21600000	7;7;7	7;7;7	7;7;7	tr|C9JXB8|C9JXB8_HUMAN 60S ribosomal protein L24 OS=Homo sapiens GN=RPL24 PE=1 SV=1;tr|C9JNW5|C9JNW5_HUMAN 60S ribosomal protein L24 OS=Homo sapiens GN=RPL24 PE=1 SV=1;sp|P83731|RL24_HUMAN 60S ribosomal protein L24 OS=Homo sapiens GN=RPL24 PE=1 SV=1	3	7	7	7	6	4	6	2	4	5	4	5	4	3	6	4	6	2	4	5	4	5	4	3	6	4	6	2	4
sp|P11142|HSP7C_HUMAN;tr|E9PKE3|E9PKE3_HUMAN;tr|E9PN89|E9PN89_HUMAN;tr|E9PNE6|E9PNE6_HUMAN;tr|E9PLF4|E9PLF4_HUMAN;tr|E9PQQ4|E9PQQ4_HUMAN;tr|E9PQK7|E9PQK7_HUMAN;tr|E9PK54|E9PK54_HUMAN;tr|A8K7Q2|A8K7Q2_HUMAN;tr|E9PPY6|E9PPY6_HUMAN;sp|P54652|HSP72_HUMAN;tr|E9PI65|E9PI65_HUMAN;tr|E9PN25|E9PN25_HUMAN;tr|E9PS65|E9PS65_HUMAN;tr|E9PM13|E9PM13_HUMAN	sp|P11142|HSP7C_HUMAN;tr|E9PKE3|E9PKE3_HUMAN;tr|E9PN89|E9PN89_HUMAN;tr|E9PNE6|E9PNE6_HUMAN;tr|E9PLF4|E9PLF4_HUMAN	0.781525	0.771914	1.00415	0.729345	0.797791	41071000	45610000	40961000	34701000	32318000	32098000	35207000	41131000	25309000	25783000	24;23;17;14;12;11;11;11;10;9;9;8;7;4;3	24;23;17;14;12;11;11;11;10;9;9;8;7;4;3	20;19;15;11;10;10;10;10;8;8;5;6;6;3;2	sp|P11142|HSP7C_HUMAN Heat shock cognate 71 kDa protein OS=Homo sapiens GN=HSPA8 PE=1 SV=1;tr|E9PKE3|E9PKE3_HUMAN Heat shock cognate 71 kDa protein OS=Homo sapiens GN=HSPA8 PE=1 SV=1;tr|E9PN89|E9PN89_HUMAN Heat shock cognate 71 kDa protein (Fragment) OS=Ho	15	24	24	20	19	15	18	13	17	10	18	14	9	14	19	15	18	13	17	10	18	14	9	14	16	13	15	10	14
sp|P62249|RS16_HUMAN;tr|M0R210|M0R210_HUMAN;tr|A0A087WZ27|A0A087WZ27_HUMAN;tr|M0R3H0|M0R3H0_HUMAN;tr|M0R1M5|M0R1M5_HUMAN;tr|Q6IPX4|Q6IPX4_HUMAN;tr|M0QX76|M0QX76_HUMAN	sp|P62249|RS16_HUMAN;tr|M0R210|M0R210_HUMAN;tr|A0A087WZ27|A0A087WZ27_HUMAN;tr|M0R3H0|M0R3H0_HUMAN;tr|M0R1M5|M0R1M5_HUMAN	0.71869	0.898173	0.645132	0.442275	0.793923	75678000	74116000	69840000	19489000	46866000	54389000	66569000	45056000	8619500	37208000	10;8;7;6;5;4;3	10;8;7;6;5;4;3	10;8;7;6;5;4;3	sp|P62249|RS16_HUMAN 40S ribosomal protein S16 OS=Homo sapiens GN=RPS16 PE=1 SV=2;tr|M0R210|M0R210_HUMAN 40S ribosomal protein S16 OS=Homo sapiens GN=RPS16 PE=1 SV=1;tr|A0A087WZ27|A0A087WZ27_HUMAN Zinc finger protein 90 OS=Homo sapiens GN=ZNF90 PE=4 SV=2;t	7	10	10	10	8	9	7	4	5	7	8	8	2	5	8	9	7	4	5	7	8	8	2	5	8	9	7	4	5
sp|P62266|RS23_HUMAN;tr|D6RD47|D6RD47_HUMAN;tr|D6RDJ2|D6RDJ2_HUMAN;tr|D6RIX0|D6RIX0_HUMAN;tr|D6R9I7|D6R9I7_HUMAN	sp|P62266|RS23_HUMAN;tr|D6RD47|D6RD47_HUMAN	0.730938	0.773444	0.706421	0.807308	0.772805	26046000	34967000	26194000	19513000	19349000	19038000	27045000	18504000	15753000	14953000	5;4;2;2;2	5;4;2;2;2	5;4;2;2;2	sp|P62266|RS23_HUMAN 40S ribosomal protein S23 OS=Homo sapiens GN=RPS23 PE=1 SV=3;tr|D6RD47|D6RD47_HUMAN 40S ribosomal protein S23 OS=Homo sapiens GN=RPS23 PE=1 SV=1	5	5	5	5	3	4	5	3	2	2	5	4	2	3	3	4	5	3	2	2	5	4	2	3	3	4	5	3	2
sp|Q99575|POP1_HUMAN;tr|E5RK39|E5RK39_HUMAN	sp|Q99575|POP1_HUMAN	0.71086	0.719677	0.936132	1	0.816257	8378300	7682200	6325500	1	4950400	5955800	5528700	5921500	1	4040800	13;5	13;5	13;5	sp|Q99575|POP1_HUMAN Ribonucleases P/MRP protein subunit POP1 OS=Homo sapiens GN=POP1 PE=1 SV=2	2	13	13	13	9	9	7	1	3	7	4	6	1	5	9	9	7	1	3	7	4	6	1	5	9	9	7	1	3
sp|Q4VCS5|AMOT_HUMAN;tr|E7ERM3|E7ERM3_HUMAN;tr|A6NP16|A6NP16_HUMAN;sp|Q8IY63|AMOL1_HUMAN	sp|Q4VCS5|AMOT_HUMAN;tr|E7ERM3|E7ERM3_HUMAN;tr|A6NP16|A6NP16_HUMAN	0.710731	0.718017	0.825857	1	3.97362e-07	3476700	3809800	3377100	1	2516600	2471000	2735500	2789000	1	1	12;9;8;1	12;9;8;1	12;9;8;1	sp|Q4VCS5|AMOT_HUMAN Angiomotin OS=Homo sapiens GN=AMOT PE=1 SV=1;tr|E7ERM3|E7ERM3_HUMAN Angiomotin OS=Homo sapiens GN=AMOT PE=1 SV=1;tr|A6NP16|A6NP16_HUMAN Angiomotin OS=Homo sapiens GN=AMOT PE=1 SV=1	4	12	12	12	6	6	6	0	2	3	4	4	0	2	6	6	6	0	2	3	4	4	0	2	6	6	6	0	2
sp|P46783|RS10_HUMAN;tr|F6U211|F6U211_HUMAN;tr|S4R435|S4R435_HUMAN;sp|Q9NQ39|RS10L_HUMAN	sp|P46783|RS10_HUMAN;tr|F6U211|F6U211_HUMAN;tr|S4R435|S4R435_HUMAN;sp|Q9NQ39|RS10L_HUMAN	0.700706	1.27584	0.336367	5968500	0.685223	19683000	18409000	31650000	1	19490000	13792000	23487000	10646000	5968500	13355000	8;6;6;4	8;6;6;4	8;6;6;4	sp|P46783|RS10_HUMAN 40S ribosomal protein S10 OS=Homo sapiens GN=RPS10 PE=1 SV=1;tr|F6U211|F6U211_HUMAN 40S ribosomal protein S10 OS=Homo sapiens GN=RPS10 PE=4 SV=1;tr|S4R435|S4R435_HUMAN Protein RPS10-NUDT3 (Fragment) OS=Homo sapiens GN=RPS10-NUDT3 PE=3	4	8	8	8	4	5	8	1	3	6	7	3	2	2	4	5	8	1	3	6	7	3	2	2	4	5	8	1	3
sp|Q9H6S0|YTDC2_HUMAN;tr|D6RA70|D6RA70_HUMAN;tr|D6R9T8|D6R9T8_HUMAN;tr|D6RF50|D6RF50_HUMAN	sp|Q9H6S0|YTDC2_HUMAN	0.7	1.32502	0.82294	1	1.1745	5083000	3103800	5340000	1	2996500	3558100	4112600	4394500	1	3519400	24;10;3;2	24;10;3;2	24;10;3;2	sp|Q9H6S0|YTDC2_HUMAN Probable ATP-dependent RNA helicase YTHDC2 OS=Homo sapiens GN=YTHDC2 PE=1 SV=2	4	24	24	24	14	5	13	0	4	5	8	8	0	5	14	5	13	0	4	5	8	8	0	5	14	5	13	0	4
sp|P20700|LMNB1_HUMAN;tr|E9PBF6|E9PBF6_HUMAN;tr|F5H5P2|F5H5P2_HUMAN;tr|A0A0D9SFY5|A0A0D9SFY5_HUMAN	sp|P20700|LMNB1_HUMAN;tr|E9PBF6|E9PBF6_HUMAN;tr|F5H5P2|F5H5P2_HUMAN	0.693174	0.881446	1.31309	1.955e-07	0.86939	7147700	6540500	3819400	5115100	3493600	4954600	5765100	5015200	1	3037300	20;18;16;8	20;18;16;8	18;16;15;7	sp|P20700|LMNB1_HUMAN Lamin-B1 OS=Homo sapiens GN=LMNB1 PE=1 SV=2;tr|E9PBF6|E9PBF6_HUMAN Lamin-B1 OS=Homo sapiens GN=LMNB1 PE=1 SV=1;tr|F5H5P2|F5H5P2_HUMAN Uncharacterized protein OS=Homo sapiens PE=4 SV=1	4	20	20	18	12	7	5	4	6	6	6	6	1	5	12	7	5	4	6	6	6	6	1	5	10	7	5	3	5
tr|D6RF44|D6RF44_HUMAN;tr|H0YA96|H0YA96_HUMAN;tr|D6RAF8|D6RAF8_HUMAN;tr|H0Y8G5|H0Y8G5_HUMAN;sp|Q14103|HNRPD_HUMAN;tr|D6RBQ9|D6RBQ9_HUMAN;tr|A0A087WUK2|A0A087WUK2_HUMAN;sp|O14979|HNRDL_HUMAN	tr|D6RF44|D6RF44_HUMAN;tr|H0YA96|H0YA96_HUMAN;tr|D6RAF8|D6RAF8_HUMAN;tr|H0Y8G5|H0Y8G5_HUMAN;sp|Q14103|HNRPD_HUMAN;tr|D6RBQ9|D6RBQ9_HUMAN;tr|A0A087WUK2|A0A087WUK2_HUMAN;sp|O14979|HNRDL_HUMAN	0.690483	1.02607	1	3.96244e-07	1	3263800	2236100	1	2523700	1	2253600	2294400	1	1	1	2;2;2;2;2;1;1;1	2;2;2;2;2;1;1;1	2;2;2;2;2;1;1;1	tr|D6RF44|D6RF44_HUMAN Heterogeneous nuclear ribonucleoprotein D0 (Fragment) OS=Homo sapiens GN=HNRNPD PE=1 SV=5;tr|H0YA96|H0YA96_HUMAN Heterogeneous nuclear ribonucleoprotein D0 (Fragment) OS=Homo sapiens GN=HNRNPD PE=1 SV=1;tr|D6RAF8|D6RAF8_HUMAN Heterog	8	2	2	2	2	2	1	2	1	2	2	1	1	1	2	2	1	2	1	2	2	1	1	1	2	2	1	2	1
sp|P52298|NCBP2_HUMAN;tr|C9JQX9|C9JQX9_HUMAN;tr|E9PJ16|E9PJ16_HUMAN;sp|A6PVI3|NCB2L_HUMAN;tr|F8WE41|F8WE41_HUMAN	sp|P52298|NCBP2_HUMAN;tr|C9JQX9|C9JQX9_HUMAN;tr|E9PJ16|E9PJ16_HUMAN	0.67947	0.919917	1.02572	1	2066300	2408200	1920500	2760000	1	1	1636300	1766700	2831000	1	2066300	3;2;2;1;1	3;2;2;1;1	3;2;2;1;1	sp|P52298|NCBP2_HUMAN Nuclear cap-binding protein subunit 2 OS=Homo sapiens GN=NCBP2 PE=1 SV=1;tr|C9JQX9|C9JQX9_HUMAN Nuclear cap-binding protein subunit 2 (Fragment) OS=Homo sapiens GN=NCBP2 PE=1 SV=1;tr|E9PJ16|E9PJ16_HUMAN Coiled-coil domain-containing p	5	3	3	3	2	2	3	1	1	2	2	2	1	2	2	2	3	1	1	2	2	2	1	2	2	2	3	1	1
sp|P05388|RLA0_HUMAN;tr|F8VWS0|F8VWS0_HUMAN;tr|F8VW21|F8VW21_HUMAN;tr|F8VU65|F8VU65_HUMAN;sp|Q8NHW5|RLA0L_HUMAN;tr|F8VPE8|F8VPE8_HUMAN;tr|G3V210|G3V210_HUMAN;tr|F8VQY6|F8VQY6_HUMAN;tr|F8VRK7|F8VRK7_HUMAN;tr|F8VZS0|F8VZS0_HUMAN;tr|F8VWV4|F8VWV4_HUMAN;tr|F8W1K8|F8W1K8_HUMAN;tr|F8VS58|F8VS58_HUMAN	sp|P05388|RLA0_HUMAN;tr|F8VWS0|F8VWS0_HUMAN;tr|F8VW21|F8VW21_HUMAN;tr|F8VU65|F8VU65_HUMAN;sp|Q8NHW5|RLA0L_HUMAN;tr|F8VPE8|F8VPE8_HUMAN;tr|G3V210|G3V210_HUMAN;tr|F8VQY6|F8VQY6_HUMAN;tr|F8VRK7|F8VRK7_HUMAN;tr|F8VZS0|F8VZS0_HUMAN	0.676588	0.767801	0.984135	0.949535	0.880648	829870000	635790000	612020000	548900000	557680000	561480000	488160000	602310000	521200000	491120000	17;16;13;12;11;10;10;9;9;9;7;6;6	17;16;13;12;11;10;10;9;9;9;7;6;6	17;16;13;12;11;10;10;9;9;9;7;6;6	sp|P05388|RLA0_HUMAN 60S acidic ribosomal protein P0 OS=Homo sapiens GN=RPLP0 PE=1 SV=1;tr|F8VWS0|F8VWS0_HUMAN 60S acidic ribosomal protein P0 OS=Homo sapiens GN=RPLP0 PE=1 SV=1;tr|F8VW21|F8VW21_HUMAN 60S acidic ribosomal protein P0 (Fragment) OS=Homo sapi	13	17	17	17	8	8	9	12	10	10	9	9	9	11	8	8	9	12	10	10	9	9	9	11	8	8	9	12	10
sp|Q14683|SMC1A_HUMAN;tr|G8JLG1|G8JLG1_HUMAN;tr|H0Y7K8|H0Y7K8_HUMAN;tr|V9GYN9|V9GYN9_HUMAN	sp|Q14683|SMC1A_HUMAN;tr|G8JLG1|G8JLG1_HUMAN	0.67613	0.651785	3.69959e-07	1	1	3902800	3574800	2703000	1	1	2638800	2330000	1	1	1	15;14;6;1	15;14;6;1	15;14;6;1	sp|Q14683|SMC1A_HUMAN Structural maintenance of chromosomes protein 1A OS=Homo sapiens GN=SMC1A PE=1 SV=2;tr|G8JLG1|G8JLG1_HUMAN Structural maintenance of chromosomes protein OS=Homo sapiens GN=SMC1A PE=1 SV=2	4	15	15	15	8	7	3	0	1	6	2	0	0	1	8	7	3	0	1	6	2	0	0	1	8	7	3	0	1
sp|P62304|RUXE_HUMAN;tr|A6NHK2|A6NHK2_HUMAN	sp|P62304|RUXE_HUMAN;tr|A6NHK2|A6NHK2_HUMAN	0.676068	1.34575	1.12546	1.05234	2.3896e-07	8265000	7118700	8627500	11597000	4184800	5587700	9580000	9709900	12204000	1	2;1	2;1	2;1	sp|P62304|RUXE_HUMAN Small nuclear ribonucleoprotein E OS=Homo sapiens GN=SNRPE PE=1 SV=1;tr|A6NHK2|A6NHK2_HUMAN Small nuclear ribonucleoprotein E OS=Homo sapiens GN=SNRPE PE=1 SV=1	2	2	2	2	2	2	2	2	2	2	2	2	2	1	2	2	2	2	2	2	2	2	2	1	2	2	2	2	2
tr|H3BV80|H3BV80_HUMAN;tr|H3BMS0|H3BMS0_HUMAN;tr|H3BMM9|H3BMM9_HUMAN;tr|H3BTC0|H3BTC0_HUMAN;sp|Q15287|RNPS1_HUMAN;tr|Q5TEE8|Q5TEE8_HUMAN	tr|H3BV80|H3BV80_HUMAN;tr|H3BMS0|H3BMS0_HUMAN;tr|H3BMM9|H3BMM9_HUMAN;tr|H3BTC0|H3BTC0_HUMAN;sp|Q15287|RNPS1_HUMAN;tr|Q5TEE8|Q5TEE8_HUMAN	0.674161	1	1	1	1	1370400	1	1	1	1	923870	1	1	1	1	2;2;2;2;2;2	2;2;2;2;2;2	2;2;2;2;2;2	tr|H3BV80|H3BV80_HUMAN RNA-binding protein with serine-rich domain 1 OS=Homo sapiens GN=RNPS1 PE=1 SV=2;tr|H3BMS0|H3BMS0_HUMAN RNA-binding protein with serine-rich domain 1 OS=Homo sapiens GN=RNPS1 PE=1 SV=1;tr|H3BMM9|H3BMM9_HUMAN RNA-binding protein with	6	2	2	2	2	0	0	0	0	2	0	0	0	2	2	0	0	0	0	2	0	0	0	2	2	0	0	0	0
sp|Q99878|H2A1J_HUMAN;sp|Q96KK5|H2A1H_HUMAN;sp|Q9BTM1|H2AJ_HUMAN;sp|Q16777|H2A2C_HUMAN;sp|Q6FI13|H2A2A_HUMAN;sp|P20671|H2A1D_HUMAN;sp|P0C0S8|H2A1_HUMAN;tr|H0YFX9|H0YFX9_HUMAN;sp|Q93077|H2A1C_HUMAN;sp|Q7L7L0|H2A3_HUMAN;sp|P04908|H2A1B_HUMAN	sp|Q99878|H2A1J_HUMAN;sp|Q96KK5|H2A1H_HUMAN;sp|Q9BTM1|H2AJ_HUMAN;sp|Q16777|H2A2C_HUMAN;sp|Q6FI13|H2A2A_HUMAN;sp|P20671|H2A1D_HUMAN;sp|P0C0S8|H2A1_HUMAN;tr|H0YFX9|H0YFX9_HUMAN;sp|Q93077|H2A1C_HUMAN;sp|Q7L7L0|H2A3_HUMAN;sp|P04908|H2A1B_HUMAN	0.669619	0.538106	1.00655	1.20608	0.640061	163690000	152730000	206150000	248110000	398790000	109610000	82185000	207500000	299240000	255250000	4;4;4;4;4;4;4;3;3;3;3	4;4;4;4;4;4;4;3;3;3;3	2;2;2;2;2;2;2;2;1;1;1	sp|Q99878|H2A1J_HUMAN Histone H2A type 1-J OS=Homo sapiens GN=HIST1H2AJ PE=1 SV=3;sp|Q96KK5|H2A1H_HUMAN Histone H2A type 1-H OS=Homo sapiens GN=HIST1H2AH PE=1 SV=3;sp|Q9BTM1|H2AJ_HUMAN Histone H2A.J OS=Homo sapiens GN=H2AFJ PE=1 SV=1;sp|Q16777|H2A2C_HUMAN	11	4	4	2	3	2	2	4	3	4	2	2	2	3	3	2	2	4	3	4	2	2	2	3	2	1	1	2	2
tr|Q5JP53|Q5JP53_HUMAN;sp|P07437|TBB5_HUMAN;tr|Q5ST81|Q5ST81_HUMAN;tr|Q5SQY0|Q5SQY0_HUMAN;sp|Q9BUF5|TBB6_HUMAN;tr|K7ESM5|K7ESM5_HUMAN;tr|A0A075B736|A0A075B736_HUMAN;tr|I3L2F9|I3L2F9_HUMAN;sp|A6NNZ2|TBB8L_HUMAN;CON__ENSEMBL:ENSBTAP00000025008;sp|Q9H4B7|TBB1_HUMAN;tr|G3V2A3|G3V2A3_HUMAN;tr|M0R2D3|M0R2D3_HUMAN;tr|F6U341|F6U341_HUMAN;tr|G3V5W4|G3V5W4_HUMAN;tr|M0R042|M0R042_HUMAN;tr|J3KP27|J3KP27_HUMA…	tr|Q5JP53|Q5JP53_HUMAN;sp|P07437|TBB5_HUMAN;tr|Q5ST81|Q5ST81_HUMAN	0.667795	0.930925	0.898323	1.01309	3.15466	32489000	47615000	34344000	17261000	11845000	21696000	44326000	30852000	17487000	37367000	16;16;13;5;5;5;5;5;5;4;4;3;2;1;1;1;1;1;1	16;16;13;5;5;5;5;5;5;4;4;3;2;1;1;1;1;1;1	4;4;2;0;0;0;0;0;0;0;0;0;0;0;0;0;0;0;0	tr|Q5JP53|Q5JP53_HUMAN Tubulin beta chain OS=Homo sapiens GN=TUBB PE=1 SV=1;sp|P07437|TBB5_HUMAN Tubulin beta chain OS=Homo sapiens GN=TUBB PE=1 SV=2;tr|Q5ST81|Q5ST81_HUMAN Tubulin beta chain OS=Homo sapiens GN=TUBB PE=1 SV=1	19	16	16	4	11	13	12	7	7	9	16	13	7	9	11	13	12	7	7	9	16	13	7	9	2	3	3	1	1
sp|Q14692|BMS1_HUMAN	sp|Q14692|BMS1_HUMAN	0.662485	0.906335	1.03387	0.775164	1.09657	36351000	38862000	29375000	26357000	26270000	24082000	35222000	30370000	20431000	28807000	28	28	28	sp|Q14692|BMS1_HUMAN Ribosome biogenesis protein BMS1 homolog OS=Homo sapiens GN=BMS1 PE=1 SV=1	1	28	28	28	21	21	16	10	15	13	20	14	7	15	21	21	16	10	15	13	20	14	7	15	21	21	16	10	15
sp|Q9HCE1|MOV10_HUMAN;tr|H0Y6A5|H0Y6A5_HUMAN	sp|Q9HCE1|MOV10_HUMAN;tr|H0Y6A5|H0Y6A5_HUMAN	0.658704	0.703507	0.646293	0.46924	0.589552	26833000	21471000	19960000	13046000	19659000	17675000	15105000	12900000	6121700	11590000	30;30	30;30	30;30	sp|Q9HCE1|MOV10_HUMAN Putative helicase MOV-10 OS=Homo sapiens GN=MOV10 PE=1 SV=2;tr|H0Y6A5|H0Y6A5_HUMAN Palmitoyltransferase (Fragment) OS=Homo sapiens GN=ZDHHC3 PE=1 SV=1	2	30	30	30	17	15	18	9	17	14	12	12	5	10	17	15	18	9	17	14	12	12	5	10	17	15	18	9	17
tr|K7ENG2|K7ENG2_HUMAN;sp|P26368|U2AF2_HUMAN	tr|K7ENG2|K7ENG2_HUMAN;sp|P26368|U2AF2_HUMAN	0.652097	2815000	1.10599	1	1.06596	1438100	1	2842600	1	1855800	937780	2815000	3143900	1	1978200	4;4	4;4	4;4	tr|K7ENG2|K7ENG2_HUMAN Splicing factor U2AF 65 kDa subunit OS=Homo sapiens GN=U2AF2 PE=1 SV=1;sp|P26368|U2AF2_HUMAN Splicing factor U2AF 65 kDa subunit OS=Homo sapiens GN=U2AF2 PE=1 SV=4	2	4	4	4	3	1	2	0	3	2	3	3	0	3	3	1	2	0	3	2	3	3	0	3	3	1	2	0	3
sp|Q12789|TF3C1_HUMAN;tr|H3BRD0|H3BRD0_HUMAN;tr|I3L1Z3|I3L1Z3_HUMAN;tr|H3BU37|H3BU37_HUMAN	sp|Q12789|TF3C1_HUMAN	0.650094	0.820316	2.23514e-07	1	0.364893	5863000	4255800	4474000	1	4348400	3811500	3491100	1	1	1586700	17;4;1;1	17;4;1;1	17;4;1;1	sp|Q12789|TF3C1_HUMAN General transcription factor 3C polypeptide 1 OS=Homo sapiens GN=GTF3C1 PE=1 SV=4	4	17	17	17	14	7	8	1	6	9	5	1	0	2	14	7	8	1	6	9	5	1	0	2	14	7	8	1	6
sp|P63173|RL38_HUMAN;tr|J3KT73|J3KT73_HUMAN;tr|J3QL01|J3QL01_HUMAN;tr|J3KSP2|J3KSP2_HUMAN	sp|P63173|RL38_HUMAN;tr|J3KT73|J3KT73_HUMAN;tr|J3QL01|J3QL01_HUMAN	0.64805	0.806971	0.986223	1.24425e-07	1.86906	6035800	7901400	8311200	8037000	4214200	3911500	6376200	8196700	1	7876600	5;4;4;2	5;4;4;2	5;4;4;2	sp|P63173|RL38_HUMAN 60S ribosomal protein L38 OS=Homo sapiens GN=RPL38 PE=1 SV=2;tr|J3KT73|J3KT73_HUMAN 60S ribosomal protein L38 OS=Homo sapiens GN=RPL38 PE=1 SV=1;tr|J3QL01|J3QL01_HUMAN 60S ribosomal protein L38 OS=Homo sapiens GN=RPL38 PE=1 SV=1	4	5	5	5	2	4	2	2	2	4	3	3	1	2	2	4	2	2	2	4	3	3	1	2	2	4	2	2	2
sp|O60287|NPA1P_HUMAN	sp|O60287|NPA1P_HUMAN	0.643665	1.28754	0.77083	1	1.18295	4217100	2952300	4059000	1	4857500	2714400	3801200	3128800	1	5746200	19	19	19	sp|O60287|NPA1P_HUMAN Nucleolar pre-ribosomal-associated protein 1 OS=Homo sapiens GN=URB1 PE=1 SV=4	1	19	19	19	8	7	8	1	7	4	8	3	1	9	8	7	8	1	7	4	8	3	1	9	8	7	8	1	7
sp|Q15061|WDR43_HUMAN;tr|C9IZK7|C9IZK7_HUMAN;tr|C9JEE7|C9JEE7_HUMAN	sp|Q15061|WDR43_HUMAN	0.635151	1.02109	1.42953	1.1376	1.48418	7079100	3841400	4575700	4800000	7963300	4496300	3922400	6541100	5460500	11819000	11;3;1	11;3;1	11;3;1	sp|Q15061|WDR43_HUMAN WD repeat-containing protein 43 OS=Homo sapiens GN=WDR43 PE=1 SV=3	3	11	11	11	6	3	4	3	5	4	4	5	2	8	6	3	4	3	5	4	4	5	2	8	6	3	4	3	5
sp|P61247|RS3A_HUMAN;tr|D6RG13|D6RG13_HUMAN;tr|E9PFI5|E9PFI5_HUMAN;tr|D6RAT0|D6RAT0_HUMAN;tr|H0Y8L7|H0Y8L7_HUMAN;tr|D6RB09|D6RB09_HUMAN;tr|D6RAS7|D6RAS7_HUMAN;tr|D6R9B6|D6R9B6_HUMAN;tr|H0Y9Y4|H0Y9Y4_HUMAN;tr|D6RED7|D6RED7_HUMAN;tr|D6RGE0|D6RGE0_HUMAN;tr|D6RI02|D6RI02_HUMAN	sp|P61247|RS3A_HUMAN;tr|D6RG13|D6RG13_HUMAN;tr|E9PFI5|E9PFI5_HUMAN;tr|D6RAT0|D6RAT0_HUMAN;tr|H0Y8L7|H0Y8L7_HUMAN;tr|D6RB09|D6RB09_HUMAN;tr|D6RAS7|D6RAS7_HUMAN;tr|D6R9B6|D6R9B6_HUMAN;tr|H0Y9Y4|H0Y9Y4_HUMAN	0.632407	0.841631	2668600	1	3.58256e-07	3437500	2986700	1	1	2791300	2173900	2513700	2668600	1	1	9;8;7;7;6;6;5;5;5;3;2;2	9;8;7;7;6;6;5;5;5;3;2;2	9;8;7;7;6;6;5;5;5;3;2;2	sp|P61247|RS3A_HUMAN 40S ribosomal protein S3a OS=Homo sapiens GN=RPS3A PE=1 SV=2;tr|D6RG13|D6RG13_HUMAN 40S ribosomal protein S3a (Fragment) OS=Homo sapiens GN=RPS3A PE=1 SV=1;tr|E9PFI5|E9PFI5_HUMAN 40S ribosomal protein S3a OS=Homo sapiens GN=RPS3A PE=1	12	9	9	9	4	4	3	0	2	3	5	2	0	1	4	4	3	0	2	3	5	2	0	1	4	4	3	0	2
sp|Q96SB4|SRPK1_HUMAN;tr|H3BLV9|H3BLV9_HUMAN;tr|Q5R363|Q5R363_HUMAN;tr|D6RBF8|D6RBF8_HUMAN;tr|D6RBM8|D6RBM8_HUMAN	sp|Q96SB4|SRPK1_HUMAN;tr|H3BLV9|H3BLV9_HUMAN;tr|Q5R363|Q5R363_HUMAN	0.632304	1.30018	0.838342	1	1.00993	3229300	1963800	3487600	1	2567900	2041900	2553300	2923800	1	2593400	7;6;6;1;1	7;6;6;1;1	7;6;6;1;1	sp|Q96SB4|SRPK1_HUMAN SRSF protein kinase 1 OS=Homo sapiens GN=SRPK1 PE=1 SV=2;tr|H3BLV9|H3BLV9_HUMAN SRSF protein kinase 1 (Fragment) OS=Homo sapiens GN=SRPK1 PE=1 SV=1;tr|Q5R363|Q5R363_HUMAN SRSF protein kinase 1 OS=Homo sapiens GN=SRPK1 PE=1 SV=2	5	7	7	7	4	5	6	0	2	4	4	3	0	2	4	5	6	0	2	4	4	3	0	2	4	5	6	0	2
sp|Q8WY36|BBX_HUMAN;tr|C9JA69|C9JA69_HUMAN;tr|C9J8D0|C9J8D0_HUMAN	sp|Q8WY36|BBX_HUMAN;tr|C9JA69|C9JA69_HUMAN	0.627627	1	1	1	1	1760600	1	1	1	1	1105000	1	1	1	1	3;3;1	3;3;1	3;3;1	sp|Q8WY36|BBX_HUMAN HMG box transcription factor BBX OS=Homo sapiens GN=BBX PE=1 SV=1;tr|C9JA69|C9JA69_HUMAN HMG box transcription factor BBX OS=Homo sapiens GN=BBX PE=1 SV=1	3	3	3	3	3	0	1	0	1	2	0	0	0	0	3	0	1	0	1	2	0	0	0	0	3	0	1	0	1
sp|Q9NYH9|UTP6_HUMAN;tr|J3KRR8|J3KRR8_HUMAN	sp|Q9NYH9|UTP6_HUMAN	0.618609	1365400	0.842922	1	6174600	3409100	1	2151800	1	1	2108900	1365400	1813800	1	6174600	14;1	14;1	14;1	sp|Q9NYH9|UTP6_HUMAN U3 small nucleolar RNA-associated protein 6 homolog OS=Homo sapiens GN=UTP6 PE=2 SV=2	2	14	14	14	5	0	5	0	3	6	2	3	0	9	5	0	5	0	3	6	2	3	0	9	5	0	5	0	3
tr|D6RIY6|D6RIY6_HUMAN;sp|Q06265|EXOS9_HUMAN;tr|D6R905|D6R905_HUMAN;tr|D6RA17|D6RA17_HUMAN;tr|H0Y9L5|H0Y9L5_HUMAN;tr|D6RAP4|D6RAP4_HUMAN	tr|D6RIY6|D6RIY6_HUMAN;sp|Q06265|EXOS9_HUMAN;tr|D6R905|D6R905_HUMAN;tr|D6RA17|D6RA17_HUMAN	0.615048	1.09194	1.29704	1.09319	0.987827	6887100	4476900	4753200	3537000	4830500	4235900	4888500	6165100	3866600	4771700	5;5;3;3;2;1	5;5;3;3;2;1	5;5;3;3;2;1	tr|D6RIY6|D6RIY6_HUMAN Exosome complex component RRP45 OS=Homo sapiens GN=EXOSC9 PE=1 SV=1;sp|Q06265|EXOS9_HUMAN Exosome complex component RRP45 OS=Homo sapiens GN=EXOSC9 PE=1 SV=3;tr|D6R905|D6R905_HUMAN Exosome complex component RRP45 (Fragment) OS=Homo s	6	5	5	5	5	3	3	2	2	2	4	4	2	4	5	3	3	2	2	2	4	4	2	4	5	3	3	2	2
sp|Q13428|TCOF_HUMAN;tr|J3KQ96|J3KQ96_HUMAN;tr|H0YA99|H0YA99_HUMAN	sp|Q13428|TCOF_HUMAN;tr|J3KQ96|J3KQ96_HUMAN	0.609769	0.565175	4.41404e-07	1	2243400	5511100	4415800	2265500	1	1	3360500	2495700	1	1	2243400	11;9;2	11;9;2	2;0;0	sp|Q13428|TCOF_HUMAN Treacle protein OS=Homo sapiens GN=TCOF1 PE=1 SV=3;tr|J3KQ96|J3KQ96_HUMAN Treacle protein (Fragment) OS=Homo sapiens GN=TCOF1 PE=1 SV=1	3	11	11	2	7	6	3	1	1	5	3	1	1	2	7	6	3	1	1	5	3	1	1	2	2	1	0	0	0
sp|Q14974|IMB1_HUMAN;tr|J3KTM9|J3KTM9_HUMAN;tr|J3QR48|J3QR48_HUMAN;tr|J3QKQ5|J3QKQ5_HUMAN	sp|Q14974|IMB1_HUMAN;tr|J3KTM9|J3KTM9_HUMAN	0.601563	0.821016	0.837942	3.29707e-07	0.800306	4581400	4166300	6046000	3033000	3665100	2756000	3420600	5066200	1	2933200	12;8;4;2	12;8;4;2	12;8;4;2	sp|Q14974|IMB1_HUMAN Importin subunit beta-1 OS=Homo sapiens GN=KPNB1 PE=1 SV=2;tr|J3KTM9|J3KTM9_HUMAN Importin subunit beta-1 (Fragment) OS=Homo sapiens GN=KPNB1 PE=1 SV=1	4	12	12	12	7	6	7	2	3	2	4	6	0	3	7	6	7	2	3	2	4	6	0	3	7	6	7	2	3
sp|Q9NUD5|ZCHC3_HUMAN	sp|Q9NUD5|ZCHC3_HUMAN	0.597804	8.56678e-07	1239100	1	7.28969e-07	2294900	1167300	1	1	1371800	1371900	1	1239100	1	1	6	6	6	sp|Q9NUD5|ZCHC3_HUMAN Zinc finger CCHC domain-containing protein 3 OS=Homo sapiens GN=ZCCHC3 PE=1 SV=1	1	6	6	6	5	3	2	1	2	2	1	2	0	1	5	3	2	1	2	2	1	2	0	1	5	3	2	1	2
sp|P14866|HNRPL_HUMAN;tr|M0QXS5|M0QXS5_HUMAN;tr|M0QYT0|M0QYT0_HUMAN;tr|M0R1W6|M0R1W6_HUMAN;tr|M0R076|M0R076_HUMAN;tr|B4DVF8|B4DVF8_HUMAN;tr|M0QYL7|M0QYL7_HUMAN	sp|P14866|HNRPL_HUMAN;tr|M0QXS5|M0QXS5_HUMAN	0.583992	1.08606	1.02184	0.534631	1.48921	17204000	13153000	17859000	9788800	9732700	10047000	14285000	18249000	5233400	14494000	15;13;6;4;3;3;3	15;13;6;4;3;3;3	15;13;6;4;3;3;3	sp|P14866|HNRPL_HUMAN Heterogeneous nuclear ribonucleoprotein L OS=Homo sapiens GN=HNRNPL PE=1 SV=2;tr|M0QXS5|M0QXS5_HUMAN Heterogeneous nuclear ribonucleoprotein L (Fragment) OS=Homo sapiens GN=HNRNPL PE=1 SV=1	7	15	15	15	10	10	10	5	5	10	7	9	3	9	10	10	10	5	5	10	7	9	3	9	10	10	10	5	5
sp|O43390|HNRPR_HUMAN;tr|B4DT28|B4DT28_HUMAN	sp|O43390|HNRPR_HUMAN;tr|B4DT28|B4DT28_HUMAN	0.579353	0.870999	1.32227	1	2065000	3502700	2896100	2698700	1	1	2029300	2522500	3568400	1	2065000	7;4	7;4	5;3	sp|O43390|HNRPR_HUMAN Heterogeneous nuclear ribonucleoprotein R OS=Homo sapiens GN=HNRNPR PE=1 SV=1;tr|B4DT28|B4DT28_HUMAN Heterogeneous nuclear ribonucleoprotein R OS=Homo sapiens GN=HNRNPR PE=1 SV=1	2	7	7	5	5	3	5	0	1	4	4	4	0	4	5	3	5	0	1	4	4	4	0	4	3	2	3	0	0
sp|O94906|PRP6_HUMAN	sp|O94906|PRP6_HUMAN	0.577779	1.04926	0.791825	1	0.776382	6170700	3437000	5125500	1	6369800	3565300	3606300	4058500	1	4945400	18	18	18	sp|O94906|PRP6_HUMAN Pre-mRNA-processing factor 6 OS=Homo sapiens GN=PRPF6 PE=1 SV=1	1	18	18	18	6	7	10	0	8	5	9	4	2	7	6	7	10	0	8	5	9	4	2	7	6	7	10	0	8
sp|Q8IX01|SUGP2_HUMAN;tr|M0R2Z9|M0R2Z9_HUMAN;tr|M0R3F6|M0R3F6_HUMAN;tr|M0R065|M0R065_HUMAN;tr|M0R216|M0R216_HUMAN	sp|Q8IX01|SUGP2_HUMAN;tr|M0R2Z9|M0R2Z9_HUMAN;tr|M0R3F6|M0R3F6_HUMAN	0.558368	0.402288	0.499903	0.647411	0.758381	13223000	11278000	9285000	4047200	6034300	7383300	4537000	4641600	2620200	4576300	23;23;20;5;4	23;23;20;5;4	23;23;20;5;4	sp|Q8IX01|SUGP2_HUMAN SURP and G-patch domain-containing protein 2 OS=Homo sapiens GN=SUGP2 PE=1 SV=2;tr|M0R2Z9|M0R2Z9_HUMAN SURP and G-patch domain-containing protein 2 OS=Homo sapiens GN=SUGP2 PE=1 SV=1;tr|M0R3F6|M0R3F6_HUMAN SURP and G-patch domain-cont	5	23	23	23	12	13	11	4	7	9	5	6	3	6	12	13	11	4	7	9	5	6	3	6	12	13	11	4	7
sp|O75533|SF3B1_HUMAN;tr|H7C341|H7C341_HUMAN;tr|B4DGZ4|B4DGZ4_HUMAN	sp|O75533|SF3B1_HUMAN	0.543384	0.760692	0.747909	0.597759	0.852419	20065000	22072000	23436000	12939000	19867000	10903000	16790000	17528000	7734400	16935000	34;3;2	34;3;2	34;3;2	sp|O75533|SF3B1_HUMAN Splicing factor 3B subunit 1 OS=Homo sapiens GN=SF3B1 PE=1 SV=3	3	34	34	34	20	19	22	7	19	14	16	15	6	17	20	19	22	7	19	14	16	15	6	17	20	19	22	7	19
sp|Q96DI7|SNR40_HUMAN;tr|Q9NSS8|Q9NSS8_HUMAN	sp|Q96DI7|SNR40_HUMAN	0.539601	0.956287	0.739866	1.17856	1.17734	5972000	4312200	7889400	3799800	3507900	3222500	4123700	5837100	4478300	4130000	10;4	10;4	10;4	sp|Q96DI7|SNR40_HUMAN U5 small nuclear ribonucleoprotein 40 kDa protein OS=Homo sapiens GN=SNRNP40 PE=1 SV=1	2	10	10	10	4	5	5	3	3	5	6	4	2	4	4	5	5	3	3	5	6	4	2	4	4	5	5	3	3
sp|Q6P158|DHX57_HUMAN;tr|H7C109|H7C109_HUMAN;tr|A0A087WZ11|A0A087WZ11_HUMAN	sp|Q6P158|DHX57_HUMAN	0.539376	0.842571	1.1133	1	5.11404e-07	2692000	2754900	1746700	1	1955400	1452000	2321200	1944600	1	1	9;4;3	9;4;3	9;4;3	sp|Q6P158|DHX57_HUMAN Putative ATP-dependent RNA helicase DHX57 OS=Homo sapiens GN=DHX57 PE=1 SV=2	3	9	9	9	3	4	5	0	3	2	7	3	0	1	3	4	5	0	3	2	7	3	0	1	3	4	5	0	3
tr|M0R0F0|M0R0F0_HUMAN;sp|P46782|RS5_HUMAN;tr|M0R0R2|M0R0R2_HUMAN;tr|M0QZN2|M0QZN2_HUMAN	tr|M0R0F0|M0R0F0_HUMAN;sp|P46782|RS5_HUMAN;tr|M0R0R2|M0R0R2_HUMAN;tr|M0QZN2|M0QZN2_HUMAN	0.517266	0.963877	0.679069	0.833947	0.450717	27597000	19240000	31552000	10864000	19741000	14275000	18545000	21426000	9060000	8897600	12;12;12;9	12;12;12;9	12;12;12;9	tr|M0R0F0|M0R0F0_HUMAN 40S ribosomal protein S5 (Fragment) OS=Homo sapiens GN=RPS5 PE=1 SV=1;sp|P46782|RS5_HUMAN 40S ribosomal protein S5 OS=Homo sapiens GN=RPS5 PE=1 SV=4;tr|M0R0R2|M0R0R2_HUMAN 40S ribosomal protein S5 OS=Homo sapiens GN=RPS5 PE=1 SV=1;tr	4	12	12	12	10	6	7	4	5	6	9	5	3	5	10	6	7	4	5	6	9	5	3	5	10	6	7	4	5
sp|P55795|HNRH2_HUMAN	sp|P55795|HNRH2_HUMAN	0.515205	1.44771	0.722428	0.749037	1.34133	4390100	4613500	5325100	3999800	4904300	2261800	6679000	3847000	2996000	6578300	15	6	6	sp|P55795|HNRH2_HUMAN Heterogeneous nuclear ribonucleoprotein H2 OS=Homo sapiens GN=HNRNPH2 PE=1 SV=1	1	15	6	6	12	11	10	7	8	8	12	10	7	8	5	5	4	3	4	2	5	4	2	5	5	5	4	3	4
sp|Q15404|RSU1_HUMAN;tr|G3V0E4|G3V0E4_HUMAN;tr|B4DLP0|B4DLP0_HUMAN;tr|G3V238|G3V238_HUMAN;tr|H0Y6Z9|H0Y6Z9_HUMAN;tr|E7ER68|E7ER68_HUMAN;tr|F8WDF7|F8WDF7_HUMAN;tr|Q5TBH0|Q5TBH0_HUMAN;tr|E7EVF8|E7EVF8_HUMAN;tr|E7ENX0|E7ENX0_HUMAN;tr|D6RDV5|D6RDV5_HUMAN;tr|R4GNI9|R4GNI9_HUMAN;tr|A6PW57|A6PW57_HUMAN;tr|C9JFC9|C9JFC9_HUMAN;tr|A0A087WUX2|A0A087WUX2_HUMAN;tr|A2A282|A2A282_HUMAN;tr|A0A5A5|A0A5A5_HUMAN;tr…	sp|Q15404|RSU1_HUMAN	0.464696	0.517978	0.64619	1	0.5773	9549900	13839000	8067600	1	4160400	4437800	7168300	5213200	1	2401800	31;9;9;8;7;5;4;4;4;2;2;2;2;2;2;2;1;1;1;1;1;1;1;1;1;1;1	31;9;9;8;7;5;4;4;4;2;2;2;2;2;2;2;1;1;1;1;1;1;1;1;1;1;1	31;9;9;8;7;5;4;4;4;2;2;2;2;2;2;2;1;1;1;1;1;1;1;1;1;1;1	sp|Q15404|RSU1_HUMAN Ras suppressor protein 1 OS=Homo sapiens GN=RSU1 PE=1 SV=3	27	31	31	31	17	26	12	0	4	7	11	6	0	5	17	26	12	0	4	7	11	6	0	5	17	26	12	0	4
sp|Q8NC51|PAIRB_HUMAN	sp|Q8NC51|PAIRB_HUMAN	0.431952	0.522202	0.595286	0.898474	0.610703	10566000	15174000	9711800	5649800	5430300	4564000	7923900	5781300	5076200	3316300	13	13	13	sp|Q8NC51|PAIRB_HUMAN Plasminogen activator inhibitor 1 RNA-binding protein OS=Homo sapiens GN=SERBP1 PE=1 SV=2	1	13	13	13	9	12	7	3	4	3	6	6	3	3	9	12	7	3	4	3	6	6	3	3	9	12	7	3	4
sp|P13489|RINI_HUMAN;tr|E9PMJ3|E9PMJ3_HUMAN;tr|E9PLZ3|E9PLZ3_HUMAN;tr|E9PIM9|E9PIM9_HUMAN;tr|H0YCR7|H0YCR7_HUMAN;tr|E9PMN0|E9PMN0_HUMAN;tr|E9PIK5|E9PIK5_HUMAN;tr|E9PMA9|E9PMA9_HUMAN;tr|E9PR82|E9PR82_HUMAN;tr|E9PMI1|E9PMI1_HUMAN	sp|P13489|RINI_HUMAN	0.398095	1.08181	1.17418	0.784167	0.689688	75369000	49955000	59041000	133390000	60639000	30004000	54042000	69325000	104600000	41822000	15;7;7;7;6;5;5;4;2;2	15;7;7;7;6;5;5;4;2;2	15;7;7;7;6;5;5;4;2;2	sp|P13489|RINI_HUMAN Ribonuclease inhibitor OS=Homo sapiens GN=RNH1 PE=1 SV=2	10	15	15	15	9	7	10	9	6	4	9	10	5	8	9	7	10	9	6	4	9	10	5	8	9	7	10	9	6
sp|P15880|RS2_HUMAN;tr|H0YEN5|H0YEN5_HUMAN;tr|E9PQD7|E9PQD7_HUMAN;tr|E9PMM9|E9PMM9_HUMAN;tr|I3L404|I3L404_HUMAN;tr|E9PPT0|E9PPT0_HUMAN;tr|E9PM36|E9PM36_HUMAN;tr|H3BNG3|H3BNG3_HUMAN;tr|H0YE27|H0YE27_HUMAN	sp|P15880|RS2_HUMAN;tr|H0YEN5|H0YEN5_HUMAN;tr|E9PQD7|E9PQD7_HUMAN;tr|E9PMM9|E9PMM9_HUMAN;tr|I3L404|I3L404_HUMAN;tr|E9PPT0|E9PPT0_HUMAN;tr|E9PM36|E9PM36_HUMAN	0.368745	0.863501	0.66882	1.262e-07	0.926499	14836000	14132000	20436000	7923900	10857000	5470700	12203000	13668000	1	10059000	8;7;6;5;4;4;4;1;1	8;7;6;5;4;4;4;1;1	8;7;6;5;4;4;4;1;1	sp|P15880|RS2_HUMAN 40S ribosomal protein S2 OS=Homo sapiens GN=RPS2 PE=1 SV=2;tr|H0YEN5|H0YEN5_HUMAN 40S ribosomal protein S2 (Fragment) OS=Homo sapiens GN=RPS2 PE=1 SV=1;tr|E9PQD7|E9PQD7_HUMAN 40S ribosomal protein S2 OS=Homo sapiens GN=RPS2 PE=1 SV=1;tr	9	8	8	8	6	4	7	2	5	4	4	3	1	4	6	4	7	2	5	4	4	3	1	4	6	4	7	2	5
sp|P62753|RS6_HUMAN;tr|A2A3R7|A2A3R7_HUMAN;tr|A2A3R5|A2A3R5_HUMAN	sp|P62753|RS6_HUMAN;tr|A2A3R7|A2A3R7_HUMAN;tr|A2A3R5|A2A3R5_HUMAN	0.349685	0.678349	0.585958	0.924157	0.782589	29069000	17519000	21906000	12394000	13233000	10165000	11884000	12836000	11454000	10356000	7;4;4	7;4;4	7;4;4	sp|P62753|RS6_HUMAN 40S ribosomal protein S6 OS=Homo sapiens GN=RPS6 PE=1 SV=1;tr|A2A3R7|A2A3R7_HUMAN 40S ribosomal protein S6 OS=Homo sapiens GN=RPS6 PE=1 SV=1;tr|A2A3R5|A2A3R5_HUMAN 40S ribosomal protein S6 OS=Homo sapiens GN=RPS6 PE=1 SV=1	3	7	7	7	3	5	3	5	3	4	4	4	4	3	3	5	3	5	3	4	4	4	4	3	3	5	3	5	3
tr|A0A024R5I4|A0A024R5I4_HUMAN;sp|P98175|RBM10_HUMAN	tr|A0A024R5I4|A0A024R5I4_HUMAN;sp|P98175|RBM10_HUMAN	0.216773	0.248892	0.298463	0.185434	0.209085	302870000	310790000	359140000	346090000	324940000	65654000	77353000	107190000	64177000	67940000	54;50	54;50	51;47	tr|A0A024R5I4|A0A024R5I4_HUMAN Solute carrier organic anion transporter family member OS=Homo sapiens GN=SLCO2B1 PE=1 SV=1;sp|P98175|RBM10_HUMAN RNA-binding protein 10 OS=Homo sapiens GN=RBM10 PE=1 SV=3	2	54	54	51	44	38	38	40	41	27	31	24	17	28	44	38	38	40	41	27	31	24	17	28	43	36	37	39	40
sp|P47914|RL29_HUMAN	sp|P47914|RL29_HUMAN	0.0481033	8.77116e-09	0.766808	145860000	1	204200000	114010000	127050000	1	1	9822700	1	97423000	145860000	1	2	2	2	sp|P47914|RL29_HUMAN 60S ribosomal protein L29 OS=Homo sapiens GN=RPL29 PE=1 SV=2	1	2	2	2	2	2	2	1	1	2	1	2	2	1	2	2	2	1	1	2	1	2	2	1	2	2	2	1	1
sp|Q16630|CPSF6_HUMAN;tr|F8WJN3|F8WJN3_HUMAN;tr|F8W084|F8W084_HUMAN	sp|Q16630|CPSF6_HUMAN;tr|F8WJN3|F8WJN3_HUMAN;tr|F8W084|F8W084_HUMAN	3.02361e-06	1	1	1	1	330730	1	1	1	1	1	1	1	1	1	2;2;1	2;2;1	2;2;1	sp|Q16630|CPSF6_HUMAN Cleavage and polyadenylation specificity factor subunit 6 OS=Homo sapiens GN=CPSF6 PE=1 SV=2;tr|F8WJN3|F8WJN3_HUMAN Cleavage and polyadenylation-specificity factor subunit 6 OS=Homo sapiens GN=CPSF6 PE=1 SV=1;tr|F8W084|F8W084_HUMAN Cl	3	2	2	2	1	0	0	0	0	0	0	0	0	1	1	0	0	0	0	0	0	0	0	1	1	0	0	0	0
sp|Q92759|TF2H4_HUMAN	sp|Q92759|TF2H4_HUMAN	2.99491e-06	1	1	1	1	333900	1	1	1	1	1	1	1	1	1	2	2	2	sp|Q92759|TF2H4_HUMAN General transcription factor IIH subunit 4 OS=Homo sapiens GN=GTF2H4 PE=2 SV=1	1	2	2	2	1	0	0	0	0	1	1	0	0	0	1	0	0	0	0	1	1	0	0	0	1	0	0	0	0
sp|Q9Y277|VDAC3_HUMAN;tr|E5RK27|E5RK27_HUMAN;tr|E5RFP6|E5RFP6_HUMAN;tr|E5RJN6|E5RJN6_HUMAN;tr|E5RHZ6|E5RHZ6_HUMAN	sp|Q9Y277|VDAC3_HUMAN;tr|E5RK27|E5RK27_HUMAN;tr|E5RFP6|E5RFP6_HUMAN;tr|E5RJN6|E5RJN6_HUMAN;tr|E5RHZ6|E5RHZ6_HUMAN	2.29769e-06	1	1	1	1	435220	1	1	1	1	1	1	1	1	1	2;1;1;1;1	2;1;1;1;1	2;1;1;1;1	sp|Q9Y277|VDAC3_HUMAN Voltage-dependent anion-selective channel protein 3 OS=Homo sapiens GN=VDAC3 PE=1 SV=1;tr|E5RK27|E5RK27_HUMAN Voltage-dependent anion-selective channel protein 3 (Fragment) OS=Homo sapiens GN=VDAC3 PE=1 SV=1;tr|E5RFP6|E5RFP6_HUMAN Vol	5	2	2	2	1	0	0	0	0	1	1	0	0	0	1	0	0	0	0	1	1	0	0	0	1	0	0	0	0
tr|X6RAJ1|X6RAJ1_HUMAN;sp|Q02040|AK17A_HUMAN	tr|X6RAJ1|X6RAJ1_HUMAN;sp|Q02040|AK17A_HUMAN	1.70692e-06	1	1	1	1	585850	1	1	1	1	1	1	1	1	1	2;2	2;2	2;2	tr|X6RAJ1|X6RAJ1_HUMAN A-kinase anchor protein 17A OS=Homo sapiens GN=AKAP17A PE=1 SV=1;sp|Q02040|AK17A_HUMAN A-kinase anchor protein 17A OS=Homo sapiens GN=AKAP17A PE=1 SV=2	2	2	2	2	1	0	0	0	0	1	0	0	0	0	1	0	0	0	0	1	0	0	0	0	1	0	0	0	0
tr|H0Y4R5|H0Y4R5_HUMAN;sp|Q5SNT2|TM201_HUMAN	tr|H0Y4R5|H0Y4R5_HUMAN;sp|Q5SNT2|TM201_HUMAN	1.47462e-06	1	1	1	1	678140	1	1	1	1	1	1	1	1	1	3;3	3;3	3;3	tr|H0Y4R5|H0Y4R5_HUMAN Transmembrane protein 201 (Fragment) OS=Homo sapiens GN=TMEM201 PE=1 SV=1;sp|Q5SNT2|TM201_HUMAN Transmembrane protein 201 OS=Homo sapiens GN=TMEM201 PE=1 SV=1	2	3	3	3	2	1	1	0	0	1	1	0	0	0	2	1	1	0	0	1	1	0	0	0	2	1	1	0	0
sp|P12273|PIP_HUMAN	sp|P12273|PIP_HUMAN	1.38464e-06	1	1	1	1	722210	1	1	1	1	1	1	1	1	1	2	2	2	sp|P12273|PIP_HUMAN Prolactin-inducible protein OS=Homo sapiens GN=PIP PE=1 SV=1	1	2	2	2	1	0	1	0	0	0	0	0	0	0	1	0	1	0	0	0	0	0	0	0	1	0	1	0	0
sp|Q8IY18|SMC5_HUMAN	sp|Q8IY18|SMC5_HUMAN	1.36219e-06	1	1	1	1	734110	1	1	1	1	1	1	1	1	1	3	3	3	sp|Q8IY18|SMC5_HUMAN Structural maintenance of chromosomes protein 5 OS=Homo sapiens GN=SMC5 PE=1 SV=2	1	3	3	3	2	0	0	0	0	0	0	0	0	1	2	0	0	0	0	0	0	0	0	1	2	0	0	0	0
tr|A0A0C4DGT8|A0A0C4DGT8_HUMAN;tr|A0A087WWP8|A0A087WWP8_HUMAN;sp|Q5VWQ0|RSBN1_HUMAN;tr|A0A0C4DH79|A0A0C4DH79_HUMAN	tr|A0A0C4DGT8|A0A0C4DGT8_HUMAN;tr|A0A087WWP8|A0A087WWP8_HUMAN;sp|Q5VWQ0|RSBN1_HUMAN	1.17403e-06	1	1.21694e-06	1	1	851770	1	821730	1	1	1	1	1	1	1	3;3;3;1	3;3;3;1	3;3;3;1	tr|A0A0C4DGT8|A0A0C4DGT8_HUMAN Round spermatid basic protein 1 OS=Homo sapiens GN=RSBN1 PE=1 SV=1;tr|A0A087WWP8|A0A087WWP8_HUMAN Round spermatid basic protein 1 OS=Homo sapiens GN=RSBN1 PE=1 SV=1;sp|Q5VWQ0|RSBN1_HUMAN Round spermatid basic protein 1 OS=Hom	4	3	3	3	2	0	3	0	0	1	0	0	0	1	2	0	3	0	0	1	0	0	0	1	2	0	3	0	0
sp|Q86YP4|P66A_HUMAN	sp|Q86YP4|P66A_HUMAN	1.16135e-06	1	1.16705e-06	1	1	861070	1	856860	1	1	1	1	1	1	1	4	4	3	sp|Q86YP4|P66A_HUMAN Transcriptional repressor p66-alpha OS=Homo sapiens GN=GATAD2A PE=1 SV=1	1	4	4	3	2	1	2	0	1	1	0	1	0	1	2	1	2	0	1	1	0	1	0	1	1	0	1	0	0
tr|E9PD14|E9PD14_HUMAN;tr|D6RFZ9|D6RFZ9_HUMAN;sp|P63244|GBLP_HUMAN;tr|D6R9L0|D6R9L0_HUMAN;tr|D6RHH4|D6RHH4_HUMAN;tr|D6R9Z1|D6R9Z1_HUMAN;tr|D6RFX4|D6RFX4_HUMAN;tr|D6RAU2|D6RAU2_HUMAN;tr|H0YAF8|H0YAF8_HUMAN;tr|J3KPE3|J3KPE3_HUMAN;tr|H0Y8W2|H0Y8W2_HUMAN;tr|D6R909|D6R909_HUMAN;tr|H0YAM7|H0YAM7_HUMAN;tr|D6RAC2|D6RAC2_HUMAN;tr|D6RBD0|D6RBD0_HUMAN;tr|D6REE5|D6REE5_HUMAN;tr|D6RGK8|D6RGK8_HUMAN	tr|E9PD14|E9PD14_HUMAN;tr|D6RFZ9|D6RFZ9_HUMAN;sp|P63244|GBLP_HUMAN;tr|D6R9L0|D6R9L0_HUMAN;tr|D6RHH4|D6RHH4_HUMAN;tr|D6R9Z1|D6R9Z1_HUMAN;tr|D6RFX4|D6RFX4_HUMAN;tr|D6RAU2|D6RAU2_HUMAN;tr|H0YAF8|H0YAF8_HUMAN;tr|J3KPE3|J3KPE3_HUMAN;tr|H0Y8W2|H0Y8W2_HUMAN	1.14929e-06	1	0.969515	1	0.999908	870100	1	960160	1	1089400	1	1	930890	1	1089300	3;3;3;3;3;3;3;3;2;2;2;1;1;1;1;1;1	3;3;3;3;3;3;3;3;2;2;2;1;1;1;1;1;1	3;3;3;3;3;3;3;3;2;2;2;1;1;1;1;1;1	tr|E9PD14|E9PD14_HUMAN Guanine nucleotide-binding protein subunit beta-2-like 1 OS=Homo sapiens GN=GNB2L1 PE=1 SV=1;tr|D6RFZ9|D6RFZ9_HUMAN Guanine nucleotide-binding protein subunit beta-2-like 1 (Fragment) OS=Homo sapiens GN=GNB2L1 PE=1 SV=5;sp|P63244|GBL	17	3	3	3	2	1	2	0	2	1	1	2	0	3	2	1	2	0	2	1	1	2	0	3	2	1	2	0	2
tr|H7C3T4|H7C3T4_HUMAN;sp|Q13162|PRDX4_HUMAN;tr|A6NJJ0|A6NJJ0_HUMAN	tr|H7C3T4|H7C3T4_HUMAN;sp|Q13162|PRDX4_HUMAN	1.14799e-06	1	1	1	1	871090	1	1	1	1	1	1	1	1	1	4;4;1	2;2;1	2;2;1	tr|H7C3T4|H7C3T4_HUMAN Peroxiredoxin-4 (Fragment) OS=Homo sapiens GN=PRDX4 PE=1 SV=1;sp|Q13162|PRDX4_HUMAN Peroxiredoxin-4 OS=Homo sapiens GN=PRDX4 PE=1 SV=1	3	4	2	2	2	2	1	0	0	2	1	0	0	0	1	1	0	0	0	0	0	0	0	0	1	1	0	0	0
tr|B5MCP9|B5MCP9_HUMAN;sp|P62081|RS7_HUMAN	tr|B5MCP9|B5MCP9_HUMAN;sp|P62081|RS7_HUMAN	1.13262e-06	600320	1	1	1	882910	1	1	1	1	1	600320	1	1	1	2;2	2;2	2;2	tr|B5MCP9|B5MCP9_HUMAN 40S ribosomal protein S7 OS=Homo sapiens GN=RPS7 PE=1 SV=1;sp|P62081|RS7_HUMAN 40S ribosomal protein S7 OS=Homo sapiens GN=RPS7 PE=1 SV=1	2	2	2	2	2	1	0	1	1	1	2	1	0	1	2	1	0	1	1	1	2	1	0	1	2	1	0	1	1
sp|P40938|RFC3_HUMAN;tr|A0A087X270|A0A087X270_HUMAN	sp|P40938|RFC3_HUMAN	1.11513e-06	1.31832e-06	1.12395e-06	1	1	896760	758540	889720	1	1	1	1	1	1	1	4;1	4;1	4;1	sp|P40938|RFC3_HUMAN Replication factor C subunit 3 OS=Homo sapiens GN=RFC3 PE=1 SV=2	2	4	4	4	3	2	2	0	0	2	0	1	0	0	3	2	2	0	0	2	0	1	0	0	3	2	2	0	0
sp|O95400|CD2B2_HUMAN	sp|O95400|CD2B2_HUMAN	1.11362e-06	1	1	1	1	897970	1	1	1	1	1	1	1	1	1	3	3	3	sp|O95400|CD2B2_HUMAN CD2 antigen cytoplasmic tail-binding protein 2 OS=Homo sapiens GN=CD2BP2 PE=1 SV=1	1	3	3	3	2	1	0	0	1	1	0	1	0	0	2	1	0	0	1	1	0	1	0	0	2	1	0	0	1
sp|P26641|EF1G_HUMAN	sp|P26641|EF1G_HUMAN	1.07311e-06	1.02922e-06	1.34492	1	0.695282	931870	971610	1041100	1	1466600	1	1	1400200	1	1019700	3	3	3	sp|P26641|EF1G_HUMAN Elongation factor 1-gamma OS=Homo sapiens GN=EEF1G PE=1 SV=3	1	3	3	3	3	2	2	0	2	1	1	3	0	2	3	2	2	0	2	1	1	3	0	2	3	2	2	0	2
sp|Q96QD9|UIF_HUMAN;tr|H9KVC6|H9KVC6_HUMAN	sp|Q96QD9|UIF_HUMAN;tr|H9KVC6|H9KVC6_HUMAN	1.05146e-06	1	1	1	1	951060	1	1	1	1	1	1	1	1	1	2;1	2;1	2;1	sp|Q96QD9|UIF_HUMAN UAP56-interacting factor OS=Homo sapiens GN=FYTTD1 PE=1 SV=3;tr|H9KVC6|H9KVC6_HUMAN UAP56-interacting factor (Fragment) OS=Homo sapiens GN=FYTTD1 PE=1 SV=5	2	2	2	2	2	1	0	0	0	0	1	0	0	1	2	1	0	0	0	0	1	0	0	1	2	1	0	0	0
sp|Q12874|SF3A3_HUMAN	sp|Q12874|SF3A3_HUMAN	1.02911e-06	6.71592e-07	1	1	1	971710	1489000	1	1	1	1	1	1	1	1	2	2	2	sp|Q12874|SF3A3_HUMAN Splicing factor 3A subunit 3 OS=Homo sapiens GN=SF3A3 PE=1 SV=1	1	2	2	2	2	2	1	1	1	1	1	1	0	1	2	2	1	1	1	1	1	1	0	1	2	2	1	1	1
tr|B1AHB1|B1AHB1_HUMAN;sp|P33992|MCM5_HUMAN;tr|B1AHB2|B1AHB2_HUMAN;tr|B1AHA9|B1AHA9_HUMAN	tr|B1AHB1|B1AHB1_HUMAN;sp|P33992|MCM5_HUMAN	1.02905e-06	1	1	1	1	971770	1	1	1	1	1	1	1	1	1	5;5;2;1	5;5;2;1	5;5;2;1	tr|B1AHB1|B1AHB1_HUMAN DNA helicase OS=Homo sapiens GN=MCM5 PE=1 SV=1;sp|P33992|MCM5_HUMAN DNA replication licensing factor MCM5 OS=Homo sapiens GN=MCM5 PE=1 SV=5	4	5	5	5	2	1	1	0	1	1	2	1	0	0	2	1	1	0	1	1	2	1	0	0	2	1	1	0	1
sp|O00148|DX39A_HUMAN;tr|K7EQN7|K7EQN7_HUMAN;tr|K7EPJ3|K7EPJ3_HUMAN;tr|A0A0D9SEM9|A0A0D9SEM9_HUMAN;tr|K7EN69|K7EN69_HUMAN;tr|K7ENP6|K7ENP6_HUMAN;tr|K7EL56|K7EL56_HUMAN;tr|K7EIL8|K7EIL8_HUMAN;tr|F6SXL5|F6SXL5_HUMAN	sp|O00148|DX39A_HUMAN;tr|K7EQN7|K7EQN7_HUMAN	9.51384e-07	1	6.54065e-07	1	6.18812e-07	1051100	1	1528900	1	1616000	1	1	1	1	1	10;7;4;3;3;2;2;2;2	2;1;0;1;0;0;0;0;0	2;1;0;1;0;0;0;0;0	sp|O00148|DX39A_HUMAN ATP-dependent RNA helicase DDX39A OS=Homo sapiens GN=DDX39A PE=1 SV=2;tr|K7EQN7|K7EQN7_HUMAN ATP-dependent RNA helicase DDX39A (Fragment) OS=Homo sapiens GN=DDX39A PE=1 SV=1	9	10	2	2	6	6	9	6	7	3	7	6	5	5	2	1	2	1	2	1	1	1	0	1	2	1	2	1	2
sp|Q8WUA4|TF3C2_HUMAN;tr|A0A087WZD8|A0A087WZD8_HUMAN;tr|H0Y4Q6|H0Y4Q6_HUMAN	sp|Q8WUA4|TF3C2_HUMAN;tr|A0A087WZD8|A0A087WZD8_HUMAN	9.19371e-07	1	1	1	1	1087700	1	1	1	1	1	1	1	1	1	3;2;1	3;2;1	3;2;1	sp|Q8WUA4|TF3C2_HUMAN General transcription factor 3C polypeptide 2 OS=Homo sapiens GN=GTF3C2 PE=1 SV=2;tr|A0A087WZD8|A0A087WZD8_HUMAN General transcription factor 3C polypeptide 2 OS=Homo sapiens GN=GTF3C2 PE=1 SV=1	3	3	3	3	2	1	0	0	0	2	0	1	0	1	2	1	0	0	0	2	0	1	0	1	2	1	0	0	0
sp|Q9Y3C6|PPIL1_HUMAN	sp|Q9Y3C6|PPIL1_HUMAN	8.43739e-07	1	1	1	1	1185200	1	1	1	1	1	1	1	1	1	2	2	2	sp|Q9Y3C6|PPIL1_HUMAN Peptidyl-prolyl cis-trans isomerase-like 1 OS=Homo sapiens GN=PPIL1 PE=1 SV=1	1	2	2	2	2	1	1	1	1	0	0	0	0	1	2	1	1	1	1	0	0	0	0	1	2	1	1	1	1
sp|Q5T9A4|ATD3B_HUMAN	sp|Q5T9A4|ATD3B_HUMAN	8.17661e-07	6.70196e-07	4.95786e-07	1	1	1223000	1492100	2017000	1	1	1	1	1	1	1	16	3	1	sp|Q5T9A4|ATD3B_HUMAN ATPase family AAA domain-containing protein 3B OS=Homo sapiens GN=ATAD3B PE=1 SV=1	1	16	3	1	8	4	10	3	4	5	6	5	3	5	2	2	3	1	1	0	1	0	0	0	0	0	1	0	0
sp|O95453|PARN_HUMAN;tr|H3BRK1|H3BRK1_HUMAN	sp|O95453|PARN_HUMAN;tr|H3BRK1|H3BRK1_HUMAN	7.92519e-07	1	1.14957e-06	1	1	1261800	1	869890	1	1	1	1	1	1	1	4;2	4;2	4;2	sp|O95453|PARN_HUMAN Poly(A)-specific ribonuclease PARN OS=Homo sapiens GN=PARN PE=1 SV=1;tr|H3BRK1|H3BRK1_HUMAN Poly(A)-specific ribonuclease PARN (Fragment) OS=Homo sapiens GN=PARN PE=1 SV=1	2	4	4	4	3	0	2	0	0	1	0	0	0	1	3	0	2	0	0	1	0	0	0	1	3	0	2	0	0
sp|Q00577|PURA_HUMAN	sp|Q00577|PURA_HUMAN	7.54262e-07	1	1854600	1	1	1325800	1	1	1	1	1	1	1854600	1	1	5	5	5	sp|Q00577|PURA_HUMAN Transcriptional activator protein Pur-alpha OS=Homo sapiens GN=PURA PE=1 SV=2	1	5	5	5	4	1	2	0	2	0	2	2	0	1	4	1	2	0	2	0	2	2	0	1	4	1	2	0	2
sp|O75940|SPF30_HUMAN	sp|O75940|SPF30_HUMAN	7.50188e-07	0.912989	0.960729	1	0.943678	1333000	1933100	1624600	1	1166500	1	1764900	1560800	1	1100800	3	3	3	sp|O75940|SPF30_HUMAN Survival of motor neuron-related-splicing factor 30 OS=Homo sapiens GN=SMNDC1 PE=1 SV=1	1	3	3	3	3	2	2	0	2	1	2	2	0	2	3	2	2	0	2	1	2	2	0	2	3	2	2	0	2
sp|O14880|MGST3_HUMAN;tr|Q5VV89|Q5VV89_HUMAN;tr|Q5VV87|Q5VV87_HUMAN	sp|O14880|MGST3_HUMAN;tr|Q5VV89|Q5VV89_HUMAN	7.17412e-07	0.699178	7.16743e-07	1	1	1393900	2213600	1395200	1	1	1	1547700	1	1	1	3;3;1	3;3;1	3;3;1	sp|O14880|MGST3_HUMAN Microsomal glutathione S-transferase 3 OS=Homo sapiens GN=MGST3 PE=1 SV=1;tr|Q5VV89|Q5VV89_HUMAN Microsomal glutathione S-transferase 3 OS=Homo sapiens GN=MGST3 PE=1 SV=1	3	3	3	3	3	2	2	0	1	1	3	1	0	1	3	2	2	0	1	1	3	1	0	1	3	2	2	0	1
sp|Q8IX12|CCAR1_HUMAN;tr|A0A0C4DGG8|A0A0C4DGG8_HUMAN;tr|F5H2E6|F5H2E6_HUMAN;tr|H0YFJ7|H0YFJ7_HUMAN;tr|F5H3E1|F5H3E1_HUMAN;tr|F5H1H2|F5H1H2_HUMAN	sp|Q8IX12|CCAR1_HUMAN;tr|A0A0C4DGG8|A0A0C4DGG8_HUMAN	7.06864e-07	4.46768e-07	1	1	1	1414700	2238300	1	1	1	1	1	1	1	1	5;3;2;1;1;1	5;3;2;1;1;1	5;3;2;1;1;1	sp|Q8IX12|CCAR1_HUMAN Cell division cycle and apoptosis regulator protein 1 OS=Homo sapiens GN=CCAR1 PE=1 SV=2;tr|A0A0C4DGG8|A0A0C4DGG8_HUMAN Cell division cycle and apoptosis regulator protein 1 (Fragment) OS=Homo sapiens GN=CCAR1 PE=1 SV=1	6	5	5	5	3	4	1	1	1	0	0	1	0	0	3	4	1	1	1	0	0	1	0	0	3	4	1	1	1
tr|K7ER16|K7ER16_HUMAN;sp|Q9Y285|SYFA_HUMAN;tr|K7EK06|K7EK06_HUMAN;tr|K7ER00|K7ER00_HUMAN;tr|K7EPH2|K7EPH2_HUMAN	tr|K7ER16|K7ER16_HUMAN;sp|Q9Y285|SYFA_HUMAN;tr|K7EK06|K7EK06_HUMAN;tr|K7ER00|K7ER00_HUMAN	6.44371e-07	1	7.27855e-07	1	1	1551900	1	1373900	1	1	1	1	1	1	1	3;3;2;2;1	3;3;2;2;1	3;3;2;2;1	tr|K7ER16|K7ER16_HUMAN Phenylalanine--tRNA ligase alpha subunit OS=Homo sapiens GN=FARSA PE=1 SV=1;sp|Q9Y285|SYFA_HUMAN Phenylalanine--tRNA ligase alpha subunit OS=Homo sapiens GN=FARSA PE=1 SV=3;tr|K7EK06|K7EK06_HUMAN Phenylalanine--tRNA ligase alpha subu	5	3	3	3	2	1	3	0	0	1	1	0	0	0	2	1	3	0	0	1	1	0	0	0	2	1	3	0	0
tr|A0A087WZU8|A0A087WZU8_HUMAN;sp|P04637|P53_HUMAN;tr|A0A087X1Q1|A0A087X1Q1_HUMAN;tr|J3KP33|J3KP33_HUMAN;tr|A0A087WXZ1|A0A087WXZ1_HUMAN;tr|A0A087WT22|A0A087WT22_HUMAN;tr|E7ESS1|E7ESS1_HUMAN;tr|E7EQX7|E7EQX7_HUMAN;tr|E9PCY9|E9PCY9_HUMAN;tr|S4R334|S4R334_HUMAN;tr|E9PFT5|E9PFT5_HUMAN;tr|E7EMR6|E7EMR6_HUMAN	tr|A0A087WZU8|A0A087WZU8_HUMAN;sp|P04637|P53_HUMAN;tr|A0A087X1Q1|A0A087X1Q1_HUMAN;tr|J3KP33|J3KP33_HUMAN;tr|A0A087WXZ1|A0A087WXZ1_HUMAN;tr|A0A087WT22|A0A087WT22_HUMAN;tr|E7ESS1|E7ESS1_HUMAN;tr|E7EQX7|E7EQX7_HUMAN	6.4156e-07	1.16579	7.51033e-07	1792800	1.34748	1558700	1681600	1331500	1	1293600	1	1960400	1	1792800	1743100	4;4;3;3;2;2;2;2;1;1;1;1	4;4;3;3;2;2;2;2;1;1;1;1	4;4;3;3;2;2;2;2;1;1;1;1	tr|A0A087WZU8|A0A087WZU8_HUMAN Cellular tumor antigen p53 OS=Homo sapiens GN=TP53 PE=1 SV=1;sp|P04637|P53_HUMAN Cellular tumor antigen p53 OS=Homo sapiens GN=TP53 PE=1 SV=4;tr|A0A087X1Q1|A0A087X1Q1_HUMAN Cellular tumor antigen p53 OS=Homo sapiens GN=TP53 P	12	4	4	4	2	2	2	0	2	2	4	1	2	2	2	2	2	0	2	2	4	1	2	2	2	2	2	0	2
sp|Q8NI27|THOC2_HUMAN;tr|A0A0C4DG98|A0A0C4DG98_HUMAN;tr|F2Z2V2|F2Z2V2_HUMAN;tr|H0Y815|H0Y815_HUMAN	sp|Q8NI27|THOC2_HUMAN;tr|A0A0C4DG98|A0A0C4DG98_HUMAN	6.37918e-07	7.18184e-07	1.48234	1	5.1725e-07	1567600	1392400	1449400	1	1933300	1	1	2148500	1	1	6;5;1;1	6;5;1;1	6;5;1;1	sp|Q8NI27|THOC2_HUMAN THO complex subunit 2 OS=Homo sapiens GN=THOC2 PE=1 SV=2;tr|A0A0C4DG98|A0A0C4DG98_HUMAN THO complex subunit 2 OS=Homo sapiens GN=THOC2 PE=1 SV=1	4	6	6	6	2	2	4	0	2	1	1	3	0	2	2	2	4	0	2	1	1	3	0	2	2	2	4	0	2
tr|B9ZVT1|B9ZVT1_HUMAN;sp|Q8IXT5|RB12B_HUMAN;tr|E5RJW8|E5RJW8_HUMAN;tr|E5RHG1|E5RHG1_HUMAN;tr|E5RJ83|E5RJ83_HUMAN;tr|E5RJV8|E5RJV8_HUMAN	tr|B9ZVT1|B9ZVT1_HUMAN;sp|Q8IXT5|RB12B_HUMAN	6.01359e-07	1.21889	1981700	1	1696800	1662900	1361400	1	1	1	1	1659400	1981700	1	1696800	6;6;1;1;1;1	6;6;1;1;1;1	6;6;1;1;1;1	tr|B9ZVT1|B9ZVT1_HUMAN RNA-binding protein 12B OS=Homo sapiens GN=RBM12B PE=1 SV=2;sp|Q8IXT5|RB12B_HUMAN RNA-binding protein 12B OS=Homo sapiens GN=RBM12B PE=1 SV=2	6	6	6	6	3	4	1	0	0	2	3	2	0	4	3	4	1	0	0	2	3	2	0	4	3	4	1	0	0
sp|Q16637|SMN_HUMAN;tr|E7EQZ4|E7EQZ4_HUMAN;tr|B4DP61|B4DP61_HUMAN	sp|Q16637|SMN_HUMAN;tr|E7EQZ4|E7EQZ4_HUMAN;tr|B4DP61|B4DP61_HUMAN	5.76302e-07	1	1	1	1	1735200	1	1	1	1	1	1	1	1	1	2;2;1	2;2;1	2;2;1	sp|Q16637|SMN_HUMAN Survival motor neuron protein OS=Homo sapiens GN=SMN1 PE=1 SV=1;tr|E7EQZ4|E7EQZ4_HUMAN Survival motor neuron protein OS=Homo sapiens GN=SMN1 PE=1 SV=1;tr|B4DP61|B4DP61_HUMAN Survival motor neuron protein OS=Homo sapiens GN=SMN1 PE=1 SV=	3	2	2	2	2	0	0	0	0	0	0	0	0	1	2	0	0	0	0	0	0	0	0	1	2	0	0	0	0
sp|P04844|RPN2_HUMAN;tr|C9JIZ3|C9JIZ3_HUMAN;tr|J3KPG2|J3KPG2_HUMAN	sp|P04844|RPN2_HUMAN	5.58005e-07	1	1	1	1	1792100	1	1	1	1	1	1	1	1	1	5;1;1	5;1;1	5;1;1	sp|P04844|RPN2_HUMAN Dolichyl-diphosphooligosaccharide--protein glycosyltransferase subunit 2 OS=Homo sapiens GN=RPN2 PE=1 SV=3	3	5	5	5	3	1	0	0	1	1	1	0	0	1	3	1	0	0	1	1	1	0	0	1	3	1	0	0	1
sp|O75934|SPF27_HUMAN	sp|O75934|SPF27_HUMAN	5.38445e-07	0.715381	2.85453e-07	1	1	1857200	4605800	3503200	1	1	1	3294900	1	1	1	5	5	5	sp|O75934|SPF27_HUMAN Pre-mRNA-splicing factor SPF27 OS=Homo sapiens GN=BCAS2 PE=1 SV=1	1	5	5	5	2	2	3	1	2	1	2	1	2	3	2	2	3	1	2	1	2	1	2	3	2	2	3	1	2
sp|O43281|EFS_HUMAN;tr|H3BR04|H3BR04_HUMAN	sp|O43281|EFS_HUMAN	5.33874e-07	8.10833e-07	1	1	1	1873100	1233300	1	1	1	1	1	1	1	1	3;1	3;1	3;1	sp|O43281|EFS_HUMAN Embryonal Fyn-associated substrate OS=Homo sapiens GN=EFS PE=1 SV=1	2	3	3	3	2	2	0	0	0	1	1	0	0	0	2	2	0	0	0	1	1	0	0	0	2	2	0	0	0
tr|Q96J85|Q96J85_HUMAN;sp|Q71RC2|LARP4_HUMAN;tr|F8W1I4|F8W1I4_HUMAN;tr|Q8TBL5|Q8TBL5_HUMAN;tr|A0A087WTL9|A0A087WTL9_HUMAN;tr|F8VY40|F8VY40_HUMAN;tr|Q6P4E2|Q6P4E2_HUMAN;tr|X6RLN4|X6RLN4_HUMAN	tr|Q96J85|Q96J85_HUMAN;sp|Q71RC2|LARP4_HUMAN;tr|F8W1I4|F8W1I4_HUMAN;tr|Q8TBL5|Q8TBL5_HUMAN;tr|A0A087WTL9|A0A087WTL9_HUMAN;tr|F8VY40|F8VY40_HUMAN;tr|Q6P4E2|Q6P4E2_HUMAN;tr|X6RLN4|X6RLN4_HUMAN	5.23368e-07	1	1	1	1	1910700	1	1	1	1	1	1	1	1	1	2;2;1;1;1;1;1;1	2;2;1;1;1;1;1;1	2;2;1;1;1;1;1;1	tr|Q96J85|Q96J85_HUMAN C-Mpl binding protein OS=Homo sapiens GN=LARP4 PE=1 SV=1;sp|Q71RC2|LARP4_HUMAN La-related protein 4 OS=Homo sapiens GN=LARP4 PE=1 SV=3;tr|F8W1I4|F8W1I4_HUMAN La-related protein 4 (Fragment) OS=Homo sapiens GN=LARP4 PE=1 SV=1;tr|Q8TBL	8	2	2	2	2	0	1	1	1	1	1	1	1	0	2	0	1	1	1	1	1	1	1	0	2	0	1	1	1
tr|Q5T7U1|Q5T7U1_HUMAN;sp|Q9Y5Q8|TF3C5_HUMAN;tr|Q5T7U0|Q5T7U0_HUMAN;tr|Q5T7U4|Q5T7U4_HUMAN;tr|H7BY84|H7BY84_HUMAN	tr|Q5T7U1|Q5T7U1_HUMAN;sp|Q9Y5Q8|TF3C5_HUMAN;tr|Q5T7U0|Q5T7U0_HUMAN;tr|Q5T7U4|Q5T7U4_HUMAN	5.12899e-07	0.597398	0.932361	1	1	1949700	1737200	1515400	1	1	1	1037800	1412900	1	1	5;5;3;3;1	5;5;3;3;1	5;5;3;3;1	tr|Q5T7U1|Q5T7U1_HUMAN General transcription factor 3C polypeptide 5 OS=Homo sapiens GN=GTF3C5 PE=1 SV=1;sp|Q9Y5Q8|TF3C5_HUMAN General transcription factor 3C polypeptide 5 OS=Homo sapiens GN=GTF3C5 PE=1 SV=2;tr|Q5T7U0|Q5T7U0_HUMAN General transcription fa	5	5	5	5	2	4	2	0	0	1	4	2	0	0	2	4	2	0	0	1	4	2	0	0	2	4	2	0	0
tr|C9J9K3|C9J9K3_HUMAN;sp|P08865|RSSA_HUMAN;tr|A0A0C4DG17|A0A0C4DG17_HUMAN;tr|A6NE09|A6NE09_HUMAN;tr|C9JQR9|C9JQR9_HUMAN	tr|C9J9K3|C9J9K3_HUMAN;sp|P08865|RSSA_HUMAN;tr|A0A0C4DG17|A0A0C4DG17_HUMAN;tr|A6NE09|A6NE09_HUMAN	4.76077e-07	1.20034	0.588177	1	4.44998e-07	2100500	1872300	3051800	1	2247200	1	2247400	1795000	1	1	4;4;4;3;1	4;4;4;3;1	4;4;4;3;1	tr|C9J9K3|C9J9K3_HUMAN 40S ribosomal protein SA (Fragment) OS=Homo sapiens GN=RPSA PE=1 SV=5;sp|P08865|RSSA_HUMAN 40S ribosomal protein SA OS=Homo sapiens GN=RPSA PE=1 SV=4;tr|A0A0C4DG17|A0A0C4DG17_HUMAN 40S ribosomal protein SA OS=Homo sapiens GN=RPSA PE=	5	4	4	4	4	2	3	0	2	1	2	3	0	1	4	2	3	0	2	1	2	3	0	1	4	2	3	0	2
sp|Q96I25|SPF45_HUMAN;tr|Q5W011|Q5W011_HUMAN;tr|Q5W010|Q5W010_HUMAN;tr|H0Y6J6|H0Y6J6_HUMAN;tr|Q5W012|Q5W012_HUMAN	sp|Q96I25|SPF45_HUMAN;tr|Q5W011|Q5W011_HUMAN;tr|Q5W010|Q5W010_HUMAN;tr|H0Y6J6|H0Y6J6_HUMAN;tr|Q5W012|Q5W012_HUMAN	4.56059e-07	5.53526e-07	0.742618	1	4.31779e-07	2192700	1806600	1801600	1	2316000	1	1	1337900	1	1	4;3;3;2;2	4;3;3;2;2	4;3;3;2;2	sp|Q96I25|SPF45_HUMAN Splicing factor 45 OS=Homo sapiens GN=RBM17 PE=1 SV=1;tr|Q5W011|Q5W011_HUMAN Splicing factor 45 (Fragment) OS=Homo sapiens GN=RBM17 PE=1 SV=1;tr|Q5W010|Q5W010_HUMAN Splicing factor 45 (Fragment) OS=Homo sapiens GN=RBM17 PE=1 SV=1;tr|H	5	4	4	4	3	3	4	1	2	0	1	3	0	0	3	3	4	1	2	0	1	3	0	0	3	3	4	1	2
tr|S4R456|S4R456_HUMAN;tr|K7EM56|K7EM56_HUMAN;tr|A0A0B4J2B4|A0A0B4J2B4_HUMAN;tr|K7EJ78|K7EJ78_HUMAN;tr|S4R417|S4R417_HUMAN;tr|K7EQJ5|K7EQJ5_HUMAN;sp|P62841|RS15_HUMAN;tr|K7ELC2|K7ELC2_HUMAN	tr|S4R456|S4R456_HUMAN;tr|K7EM56|K7EM56_HUMAN;tr|A0A0B4J2B4|A0A0B4J2B4_HUMAN;tr|K7EJ78|K7EJ78_HUMAN;tr|S4R417|S4R417_HUMAN;tr|K7EQJ5|K7EQJ5_HUMAN;sp|P62841|RS15_HUMAN;tr|K7ELC2|K7ELC2_HUMAN	4.42087e-07	1.31475	1	1	1	2262000	1736000	1	1	1	1	2282400	1	1	1	2;2;2;2;2;2;2;2	2;2;2;2;2;2;2;2	2;2;2;2;2;2;2;2	tr|S4R456|S4R456_HUMAN 40S ribosomal protein S15 (Fragment) OS=Homo sapiens GN=RPS15 PE=1 SV=1;tr|K7EM56|K7EM56_HUMAN 40S ribosomal protein S15 OS=Homo sapiens GN=RPS15 PE=1 SV=2;tr|A0A0B4J2B4|A0A0B4J2B4_HUMAN 40S ribosomal protein S15 OS=Homo sapiens GN=R	8	2	2	2	2	2	1	0	1	1	2	0	0	1	2	2	1	0	1	1	2	0	0	1	2	2	1	0	1
sp|Q9P031|TAP26_HUMAN;tr|F8VNY5|F8VNY5_HUMAN	sp|Q9P031|TAP26_HUMAN;tr|F8VNY5|F8VNY5_HUMAN	4.39792e-07	1	0.745714	1	1.00639	2273800	1	1860500	1	1331100	1	1	1387400	1	1339600	4;2	4;2	4;2	sp|Q9P031|TAP26_HUMAN Thyroid transcription factor 1-associated protein 26 OS=Homo sapiens GN=CCDC59 PE=1 SV=2;tr|F8VNY5|F8VNY5_HUMAN Thyroid transcription factor 1-associated protein 26 (Fragment) OS=Homo sapiens GN=CCDC59 PE=1 SV=1	2	4	4	4	2	1	3	1	2	1	1	3	1	2	2	1	3	1	2	1	1	3	1	2	2	1	3	1	2
[truncated: 16 more rows]
[truncated: 57 more columns]
