# Supplementary material for: Nascent alt-protein chemoproteomics reveals a repressor of ribosome biogenesis
Source: Research Square preprint supplement (doi:10.21203/rs.3.rs-871945/v1), 2021-09-09
Supplement: Supplementary file 7 [file 0b3df1e7f98058ed75301706.xlsx]

## Sheet: MS peptides
Peptide ID	Peptide detected by shotgun proteomics	Position relative to annotated ORF	Start Codon	Putative Length (aa)	Treatment	Transcript	Putative protein sequence
1	SGLAACTAPLPGSR	5'UTR	non-AUG	317	Arsenite	C1orf122-204	MATTAPARSSATAARSASVQPARSGLAACTAPLPGSRNSRAPGAAGAGLGGRKRRPLREPAGPSLNPTLAATAALIPLHRRAGDIRPGPLPGGSDAPSQLPVQETRPRLCAGQLKGTTTPRRIEGDRWGRGGAQPCEALTQRWGGGRPKGGRWSGRASGDGMGPGLRLVTGGGCRRGPREGGAGARREATPTAAPGGARPAAAGRGGAAAAAAPGHHRSLRGDVTAAGPPAPGAGWWRERLSQTWSAPPAGCLRQRRLSKGCWRWSCGALTIPEQNTLTSLPPQGRWLDSEQLPSVKGPVFTGSGWYLALSLEWQLC
	AGDIRPGPLPGGSDAPSQLPVQETR				Arsenite
	PGPLPGGSDAPSQLPVQETRPR				Etoposide
	AGDIRPGPLPGGSDAPSQLPVQETR				Etoposide
	EPAGPSLNPTLAATAALIPLHR				Etoposide
	AGDIRPGPLPGGSDAPSQLPVQETR				DMSO
	EPAGPSLNPTLAATAALIPLHR				DMSO
2	EVHAQLPGQLEEGEQGAGEPLAEDAVR	5'UTR	AUG	72	Arsenite	PRH1	MLAPEAVSLVMALNMYLQSDVEDHRARDVEVREVHAQLPGQLEEGEQGAGEPLAEDAVRGSPAFGSRPQGHM
	EVHAQLPGQLEEGEQGAGEPLAEDAVR				DMSO
3	GDDGGTGGAGVPALR	5'UTR	AUG	84	DMSO	NLRX1	MEAGRGDDGGTGGAGVPALRLLRSTGPLSLTPSSQDPAGPSAWARPLSRPLPGQKSVLGPPGSDLLSQDEVGPPFAQGLLGLWF
4	EAESSPATDTAAAPAAR	5'UTR	AUG	93	DMSO	PRR3-202	MPGRDGGRQLAPECGRRRCSPQPSGSGMAGASALLPTDPPEAETESPRAPSSLPSKSRCSHCRRHDAETKEAESSPATDTAAAPAARAGRDWR
5	DAEQEEEVQR	5'UTR	non-AUG	90	DMSO	DRAP1-201	MDPTRRERPRDAEQEEEVQRAVPAGADQEDHADGRRDWEGGGGGACHHLPGARALPRVAVEEGLPGDPVAEREDHDHIPPEAVHRAGAAV
6	LGLAGPASGGPAGNR	5'UTR	non-AUG	85	Etoposide	CNPY2	MENPGQPCSLQPGVVSGATGAKVRVQRSSSAWATAAALGAEVERPHYAKDERLGLAGPASGGPAGNRLGSEEPGSPLWSMQGSGG
7	GTFGARAETR	5'UTR	non-AUG	<199	DMSO	PPP1R18	ERGRGAGLAGAGEKRHGAGPWHSGVAWGSRWGRQAVVTGQGGGGR QGSGNALAALTPGFRKSRGWLFPPTRLGGGVRGRGVGAGERRGPSGAGSGAGTFGARAET RPAAAAALLSPLPWFPFSSRPVRSPPLLASPTPPQVPLPPGPFRDSWSFLPTLASLGYR
8	LSVGGGGGTGTAPPAR	CDS	AUG	130	DMSO	RBM10	MKDVVVVVTGLAAMEPLTARRMMVGRTAAETTTTGTWTTVHILASMAARRASMTMTTHLRSRVRRIPTRPPRAPRLSVGGGGGTGTAPPARQASPETATIGTRTIGPSKGRRRRRRRMRRRRRRPVTSSC
9	EVVDIVPMKALDTGGPMATGLMMSLVTEAMTIEGR	CDS	AUG	290	Arsenite	PPP1R10-001	MVSHQGVLGAPRACSTFPLDLGDLCQVPMEALVGQWVHVFWVLHPLPGEVIPSGMARATLCGVAQCGGVQDQVLDHTIEAEVAEEETNLLLLLLHSEAPEEVALEEDPQMDEGALVGAWLEVVGIVLTKALVGAWATAVDIVPTKALAVAWEVGIAPMKALVVAWVGVEDIVPTKALAVASVVAVAIVPMKALAEEWVPVVDIAPTKALAEAWVEVVDIVPMKALDTGGPMATGLMMSLVTEAMTIEGRHLMSTVAMMVLATGEGATEGTMEATAMEETCQTALSADIS*
10	DGADGGGGAGSAGQIQR	CDS	AUG	102	DMSO	CACTIN	MGGETDGAGRTRDGADGGGGAGSAGQIQRKSGGSAQGCEAGAPRGPSGTQEMGPLSRTQERSSHGASGLAGDGAHARGLLAPQHPAPRLQGDPRAPGRPRLP
11	APQSLLSMPLVPLETLS	CDS	AUG	162	Arsenite	MICALL1-201	MEAPRRWPSRAQRPAWSPNPITPLRRRRRTRRKRLQLHPAWPPALPWATRSPHPS PCTPGTASPLPAAPRQRSALPRAHPARPHWLSTPPASRTRSRPRPHHRQRSAWRACRLRA PARLQVQSFWSRQLCPRAPQSLLSMPLVPLETLSASLPTPPWPPLGN
12	GGGGGGGGGGGSDGPGPGDGGAEGPGEAPHR	CDS	non-AUG	<140	DMSO	KMT5A-202	WPGAFTAADFVWQEDVQAPRGGGGGGGGGGGSDGPGPGDGGAEGPGEAPHRRGERIYRAV KDLFLHEPEQMLWNAFPPSGRELSYTSRSQMPGETISRNLQETRREKKCWERSTERHEVR GTEDQRRQERSPGTFSKPKI
13	LPLQDPPLK	CDS	non-AUG	<110	DTT	ARL10	VWGSCSGSWVYRLSI TSGRFSSWQPALPLQDPPLKSLAPCTSGNCSWSSSPRLELSCLPPACQDHSCTAAASLPD WAWGKSHMAAFPFSPPLPFKSRAWARPRTMQKPSW
14	APTAAAAACPAGAAPR	CDS	non-AUG	<133	Arsenite	FOXC1	TASTSSSWTASPSTGTTSRAGRTASATTSRSTSASSRCRATTRSRARAATGRWTRTPTTCSRTAASCGGGGASRRRTR- RTRRRRTGCTSRSRPRPAASPRPRRRSRPTATRPVRSRRPCASRTSRPRTVRAPRRPSPC PRPPPWAAAAPPRCPRSRAPTAAAAACPAGAAPRAACRRRGRSAWTVRIPRRRRPRPPPR RRTIARASAWTTS
15	GSTSGFPTASVSGCPGHEQAPDSSAR	CDS	non-AUG	192	DMSO	DAZAP1	MNNSGADEIGWLWTAPCRKRSPPATPTVHLLHRVHPSWRLSPSPGLPSGLRCPATVQFWL RASTSTARSVCPSGGSSSTSHSRGSTSGFPTASVSGCPGHEQAPDSSARLPLWSVCRLRA GLEWLRTGLLRPQPAASFLRGSLRARVGGPPRRRQRLWTRAEPQRARVPPLPTLARGAAT SARPRPRIPNL
	GSTSGFPTASVSGCPGHEQAPDSSAR				DTT
	GSTSGFPTASVSGCPGHEQAPDSSAR				Etoposide
	GSTSGFPTASVSGCPGHEQAPDSSAR				Arsenite
16	QQVWFRSPPTPLCSFEANV	3'UTR	non-AUG	<73	Arsenite	DLG3	AVKPCCFFPESDGSDCDQGNLHRHKCRQQVWFR SPPTPLCSFEANVPPSPPYWRDDAGENREVLGPRIEALVS
17	LTDGLTDLCTH	3'UTR	non-AUG	<42	DTT	TMEM47	ISKCLSRGVEFIWLSPGPLKLTDGLTDLCTHLGWIYVK GITY
18	PVSLLAPLIPPR	N-terminal extension	non-AUG	1036	DMSO	PRPF40A-202	MQAT PSEAEAGGESPQSCVSAAHSDWTAGKPVSLLAPLIPPRSAGQPLTFSPSGRQPLRSLLVG MCSGSGRRRSSLSPTMRPGTGAERGGLMMGHPGMHYAPMGMHPMGQRANMPPVPHGMMPQ MMPPMGGPPMGQMPGMMSSVMPGMMMSHMSQASMQPALPPGVNSMDVAAGTASGAKSMWT EHKSPDGRTYYYNTETKQSTWEKPDDLKTPAEQLLSKCPWKEYKSDSGKPYYYNSQTKES RWAKPKELEDLEGYQNTIVAGSLITKSNLHAMIKAEESSKQEECTTTSTAPVPTTEIPTT MSTMAAAEAAAAVVAAAAAAAAAAAAANANASTSASNTVSGTVPVVPEPEVTSIVATVVD NENTVTISTEEQAQLTSTPAIQDQSVEV…
19	AAPELGPGATIEAGAAR	N-terminal extension	non-AUG	<345	Etoposide	HDGF	EEEWGPGGGWRKRPRAEEGAIEFQTQTTARARTHRAGALPRSAPAPSVRRAGGDAVAAPE LGPGATIEAGAARGPERSGAATAARANLGSRFPARRGARGARSPAMSRSNRQKEYKCGDL VFAKMKGYPHWPARIDEMPEAAVKSTANKYQVFFFGTHETAFLGPKDLFPYEESKEKFGK PNKRKGFSEGLWEIENNPTVKASGYQSSQKKSCVEEPEPEPEAAEGDGDKKGNAEGSSDE EGKLVIDEPAKEKNEKGALKRRAGDLLEDSPKRPKEAENPEGEEKEAATLEVERPLPMEV EKNSTPSEPGSGRGPPQEEEEEEDEEEEATKEDAEAPGIRDHESL
	AAPELGPGATIEAGAAR				Arsenite
	AAPELGPGATIEAGAAR				DMSO
20	ADAGAMAATDIAR	N-terminal extension	non-AUG	<522	DTT	SEPTIN6	KNWNWSGHRGKRRVKSAPSPYPTFKGWAVEGRLGLEQRRGGPSLAPPPTGLGRARSVTLS LCRRSSSVSCAVAPVAAAPVAALADAGAMAATDIARQVGEGCRTVPLAGHVGFDSLPDQL VNKSVSQGFCFNILCVGETGLGKSTLMDTLFNTKFEGEPATHTQPGVQLQSNTYDLQESN VRLKLTIVSTVGFGDQINKEDSYKPIVEFIDAQFEAYLQEELKIRRVLHTYHDSRIHVCL YFIAPTGHSLKSLDLVTMKKLDSKVNIIPIIAKADAISKSELTKFKIKITSELVSNGVQI YQFPTDDESVAEINGTMNAHLPFAVIGSTEELKIGNKMMRARQYPWGTVQVENEAHCDFV KLREMLIRVNMEDLREQTHTRHYELYRRCKLEE…
21	AAAAEEAAAAGPR	N-terminal extension	non-AUG	<321	DMSO	UBE2M-201	PHPLA EGSAERPNGTVGGAPSPQLQRGLRPELARARKERPRAVGAGPGGPENSRIWPSAAERVRG AGPGRSRTTGAEAGRAVGAERSGAARQAGRVAAAAEEAAAAGPRSGGDAGGGGGPGGRGP GPRGGGSGGGGGRMIKLFSLKQQKKEEESAGGTKGSSKKASAAQLRIQKDINELNLPKTC DISFSDPDDLLNFKLVICPDEGFYKSGKFVFSFKVGQGYPHDPPKVKCETMVYHPNIDLE GNVCLNILREDWKPVLTINSIIYGLQYLFLEPNPEDPLNKEAAEVLQNNRRLFEQNVQRS MRGGYIGSTYFERCLK
22	AAAAAAAAAAAAAAGTR	N-terminal extension	non-AUG	<539	Arsenite	PHF10	GAGPGRRGARAAAAAAAAAAAAAAGTRRRRRRRRRRGALGLMAAAAGPGAALSPRPCDSDPATPGAQSPKDDNEDNSNDGTQPSKRRRMGSGDSSRSCETSSQDLGFSYYPAENLIEYKWPPDETGEYYMLQEQVSEYLGVTSFKRKYPDLERRDLSHKEKLYLRELNVITETQCTLGLTALRSDEVIDLMIKEYPAKHAEYSVILQEKERQRITDHYKEYSQMQQQNTQKVEASKVPEYIKKAAKKAAEFNSNLNRERMEERRAYFDLQTHVIQVPQGKYKVLPTERTKVSSYPVALIPGQFQEYYKRYSPDELRYLPLNTALYEPPLDPELPALDSDGDSDDGEDGRGDEKRKNKGTSDSSSGNVSEGESPPDSQEDSFQGRQKSKDKAATPRKDGP…
