# Supplementary material for: Nascent alt-protein chemoproteomics reveals a repressor of ribosome biogenesis
Source: Research Square preprint supplement (doi:10.21203/rs.3.rs-871945/v1), 2021-09-09
Supplement: Supplementary file 8 [file 39fc3ed74da05c0271d55388.xlsx]

## Sheet: Key
Abbreviations used for protein and peptide identification summary tables
Peptide Identifications
Database Accession	UniProt + MINAS-60 protein; contaminants
Peptide m/z	Observed mass over charge
Peptide Mass	Observed relative molecular mass
Peptide Score	Peptide match score
Sequence	Sequence of the peptide in 1-letter code
Modifications	Any variable modifications found in the peptide
Protein Identifications
LFQ intensity	Label-free quantification intensity
Protein IDs	The name of protein identified
Worksheets
S1	Key
S2	Interacted partner protein level evidence

## Sheet: Interacted partner of MINAS-60
Protein IDs	Majority protein IDs	KI/Ctrl-1	KI/Ctrl-2	KI/Ctrl-3	ave_ctrl	LFQ intensity Ctrl-1	LFQ intensity Ctrl-2	LFQ intensity Ctrl-3	LFQ intensity KI-1	LFQ intensity KI-2	LFQ intensity KI-3	Peptide counts (all)	Peptide counts (razor+unique)	Peptide counts (unique)	Fasta headers	Number of proteins	Peptides	Razor + unique peptides	Unique peptides	Peptides ctrl-1	Peptides ctrl-2	Peptides ctrl-3	Peptides pd-1	Peptides pd-2	Peptides pd-3	Razor + unique peptides ctrl-1	Razor + unique peptides ctrl-2	Razor + unique peptides ctrl-3	Razor + unique peptides pd-1	Razor + unique peptides pd-2	Razor + unique peptides pd-3	Unique peptides ctrl-1	Unique peptides ctrl-2	Unique peptides ctrl-3	Unique peptides pd-1	Unique peptides pd-2	Unique peptides pd-3	Sequence coverage [%]	Unique + razor sequence coverage [%]	Unique sequence coverage [%]	Mol. weight [kDa]	Sequence length	Sequence lengths	Q-value	Score	Sequence coverage ctrl-1 [%]	Sequence coverage ctrl-2 [%]	Sequence coverage ctrl-3 [%]	Sequence coverage pd-1 [%]
sp|Q02878|RL6_HUMAN60SribosomalproteinL6OS=HomosapiensGN=RPL6PE=1SV=3;tr|F8VZ45|F8VZ45_HUMAN60SribosomalproteinL6(Fragment)OS=HomosapiensGN=RPL6PE=1SV=1;tr|U3KQR5|U3KQR5_HUMAN60SribosomalproteinL6(Fragment)OS=HomosapiensGN=RPL6PE=1SV=1;tr|F8VR69|F8VR69_HUMAN60SribosomalproteinL6(Fragment)OS=HomosapiensGN=RPL6PE=1SV=5;tr|F8VZA3|F8VZA3_HUMAN60SribosomalproteinL6(Fragment)OS=HomosapiensGN=RPL6PE=1SV…	sp|Q02878|RL6_HUMAN60SribosomalproteinL6OS=HomosapiensGN=RPL6PE=1SV=3	6984200000	2393800000	2848200000	1	0	0	0	6984200000	2393800000	2848200000	20;7;7;4;3;3;3	20;7;7;4;3;3;3	20;7;7;4;3;3;3		7	20	20	20	1	1	0	17	13	11	1	1	0	17	13	11	1	1	0	17	13	11	50.7	50.7	50.7	32.728	288	288;159;160;64;105;118;120	0	323.31	3.1	4.5	0	47.6
tr|J3KTD2|J3KTD2_HUMANRotatinOS=HomosapiensGN=RTTNPE=1SV=1;sp|Q86VV8|RTTN_HUMANRotatinOS=HomosapiensGN=RTTNPE=1SV=3	tr|J3KTD2|J3KTD2_HUMANRotatinOS=HomosapiensGN=RTTNPE=1SV=1;sp|Q86VV8|RTTN_HUMANRotatinOS=HomosapiensGN=RTTNPE=1SV=3	0	0	393370000	1	0	0	0	0	0	393370000	1;1	1;1	1;1	;	2	1	1	1	1	0	0	1	1	1	1	0	0	1	1	1	1	0	0	1	1	1	1.4	1.4	1.4	56.318	500	500;2226	0.0039683	6.2633	1.4	0	0	1.4
sp|Q8TDN6|BRX1_HUMANRibosomebiogenesisproteinBRX1homologOS=HomosapiensGN=BRIX1PE=1SV=2	sp|Q8TDN6|BRX1_HUMANRibosomebiogenesisproteinBRX1homologOS=HomosapiensGN=BRIX1PE=1SV=2	27961000	60620000	279240000	1	0	0	0	27961000	60620000	279240000	7	7	7		1	7	7	7	0	0	0	4	3	5	0	0	0	4	3	5	0	0	0	4	3	5	23.8	23.8	23.8	41.401	353	353	0	57.81	0	0	0	15.9
sp|P39023|RL3_HUMAN60SribosomalproteinL3OS=HomosapiensGN=RPL3PE=1SV=2;tr|G5E9G0|G5E9G0_HUMAN60SribosomalproteinL3OS=HomosapiensGN=RPL3PE=1SV=1;tr|H7C3M2|H7C3M2_HUMAN60SribosomalproteinL3(Fragment)OS=HomosapiensGN=RPL3PE=1SV=1;tr|H7C422|H7C422_HUMAN60SribosomalproteinL3(Fragment)OS=HomosapiensGN=RPL3PE=1SV=1;tr|B5MCW2|B5MCW2_HUMAN60SribosomalproteinL3(Fragment)OS=HomosapiensGN=RPL3PE=1SV=1;tr|F8WC…	sp|P39023|RL3_HUMAN60SribosomalproteinL3OS=HomosapiensGN=RPL3PE=1SV=2;tr|G5E9G0|G5E9G0_HUMAN60SribosomalproteinL3OS=HomosapiensGN=RPL3PE=1SV=1;tr|H7C3M2|H7C3M2_HUMAN60SribosomalproteinL3(Fragment)OS=HomosapiensGN=RPL3PE=1SV=1;tr|H7C422|H7C422_HUMAN60SribosomalproteinL3(Fragment)OS=HomosapiensGN=RPL3PE=1SV=1	87781000	104810000	143750000	1	0	0	0	87781000	104810000	143750000	12;9;6;6;5;3	12;9;6;6;5;3	12;9;6;6;5;3	;;;	6	12	12	12	0	0	0	4	9	8	0	0	0	4	9	8	0	0	0	4	9	8	32.8	32.8	32.8	46.108	403	403;351;261;305;272;180	0	88.957	0	0	0	11.9
sp|Q9H7B2|RPF2_HUMANRibosomeproductionfactor2homologOS=HomosapiensGN=RPF2PE=1SV=2;tr|Q5VXN0|Q5VXN0_HUMANRibosomeproductionfactor2homolog(Fragment)OS=HomosapiensGN=RPF2PE=1SV=1	sp|Q9H7B2|RPF2_HUMANRibosomeproductionfactor2homologOS=HomosapiensGN=RPF2PE=1SV=2;tr|Q5VXN0|Q5VXN0_HUMANRibosomeproductionfactor2homolog(Fragment)OS=HomosapiensGN=RPF2PE=1SV=1	267510000	153820000	138860000	1	0	0	0	267510000	153820000	138860000	10;9	10;9	10;9	;	2	10	10	10	0	0	0	9	6	5	0	0	0	9	6	5	0	0	0	9	6	5	34.6	34.6	34.6	35.582	306	306;214	0	238.64	0	0	0	29.4
sp|P22087|FBRL_HUMANrRNA2'-O-methyltransferasefibrillarinOS=HomosapiensGN=FBLPE=1SV=2;tr|M0QXL5|M0QXL5_HUMANrRNA2'-O-methyltransferasefibrillarin(Fragment)OS=HomosapiensGN=FBLPE=1SV=1;tr|M0R0P1|M0R0P1_HUMANrRNA2'-O-methyltransferasefibrillarin(Fragment)OS=HomosapiensGN=FBLPE=1SV=1;tr|M0R299|M0R299_HUMANrRNA2'-O-methyltransferasefibrillarin(Fragment)OS=HomosapiensGN=FBLPE=1SV=1;tr|M0R2Q4|M0R2Q4_HU…	sp|P22087|FBRL_HUMANrRNA2'-O-methyltransferasefibrillarinOS=HomosapiensGN=FBLPE=1SV=2;tr|M0QXL5|M0QXL5_HUMANrRNA2'-O-methyltransferasefibrillarin(Fragment)OS=HomosapiensGN=FBLPE=1SV=1;tr|M0R0P1|M0R0P1_HUMANrRNA2'-O-methyltransferasefibrillarin(Fragment)OS=HomosapiensGN=FBLPE=1SV=1;tr|M0R299|M0R299_HUMANrRNA2'-O-methyltransferasefibrillarin(Fragment)OS=HomosapiensGN=FBLPE=1SV=1;tr|M0R2Q4|M0R2Q4_HU…	312110000	105580000	118670000	1	0	0	0	312110000	105580000	118670000	11;10;9;9;9;7;7;7;1;1	11;10;9;9;9;7;7;7;1;1	9;8;7;7;7;6;6;6;1;1	;;;;;;;	10	11	11	9	0	0	0	10	6	7	0	0	0	10	6	7	0	0	0	8	4	6	35.2	35.2	31.8	33.784	321	321;244;228;229;273;157;178;182;37;40	0	168.28	0	0	0	34.9
sp|Q99848|EBP2_HUMANProbablerRNA-processingproteinEBP2OS=HomosapiensGN=EBNA1BP2PE=1SV=2;tr|H7C2Q8|H7C2Q8_HUMANEBNA1bindingprotein2,isoformCRA_dOS=HomosapiensGN=EBNA1BP2PE=1SV=1	sp|Q99848|EBP2_HUMANProbablerRNA-processingproteinEBP2OS=HomosapiensGN=EBNA1BP2PE=1SV=2;tr|H7C2Q8|H7C2Q8_HUMANEBNA1bindingprotein2,isoformCRA_dOS=HomosapiensGN=EBNA1BP2PE=1SV=1	23593000	86200000	84009000	1	0	0	0	23593000	86200000	84009000	8;8	8;8	8;8	;	2	8	8	8	0	0	0	5	5	5	0	0	0	5	5	5	0	0	0	5	5	5	31	31	31	34.852	306	306;361	0	58.931	0	0	0	22.2
sp|Q9BYG3|MK67I_HUMANMKI67FHAdomain-interactingnucleolarphosphoproteinOS=HomosapiensGN=NIFKPE=1SV=1;tr|C9J6C5|C9J6C5_HUMANMKI67FHAdomain-interactingnucleolarphosphoprotein(Fragment)OS=HomosapiensGN=NIFKPE=1SV=1;tr|C9J808|C9J808_HUMANMKI67FHAdomain-interactingnucleolarphosphoprotein(Fragment)OS=HomosapiensGN=NIFKPE=1SV=5;tr|H7BZL0|H7BZL0_HUMANMKI67FHAdomain-interactingnucleolarphosphoprotein(Fragm…	sp|Q9BYG3|MK67I_HUMANMKI67FHAdomain-interactingnucleolarphosphoproteinOS=HomosapiensGN=NIFKPE=1SV=1;tr|C9J6C5|C9J6C5_HUMANMKI67FHAdomain-interactingnucleolarphosphoprotein(Fragment)OS=HomosapiensGN=NIFKPE=1SV=1	92890000	57295000	72408000	1	0	0	0	92890000	57295000	72408000	12;6;5;3	12;6;5;3	12;6;5;3	;	4	12	12	12	0	0	0	12	4	5	0	0	0	12	4	5	0	0	0	12	4	5	43.3	43.3	43.3	34.222	293	293;166;165;102	0	223.98	0	0	0	43.3
sp|P36578|RL4_HUMAN60SribosomalproteinL4OS=HomosapiensGN=RPL4PE=1SV=5;tr|H3BU31|H3BU31_HUMAN60SribosomalproteinL4(Fragment)OS=HomosapiensGN=RPL4PE=1SV=1;tr|H3BM89|H3BM89_HUMAN60SribosomalproteinL4OS=HomosapiensGN=RPL4PE=1SV=1;tr|H3BTP7|H3BTP7_HUMAN60SribosomalproteinL4(Fragment)OS=HomosapiensGN=RPL4PE=1SV=1	sp|P36578|RL4_HUMAN60SribosomalproteinL4OS=HomosapiensGN=RPL4PE=1SV=5;tr|H3BU31|H3BU31_HUMAN60SribosomalproteinL4(Fragment)OS=HomosapiensGN=RPL4PE=1SV=1;tr|H3BM89|H3BM89_HUMAN60SribosomalproteinL4OS=HomosapiensGN=RPL4PE=1SV=1	37841000	70570000	56099000	1	0	0	0	37841000	70570000	56099000	9;5;5;4	9;5;5;4	9;5;5;4	;;	4	9	9	9	0	1	0	6	8	7	0	1	0	6	8	7	0	1	0	6	8	7	25.3	25.3	25.3	47.697	427	427;171;333;170	0	60.868	0	2.1	0	16.6
sp|Q86W42|THOC6_HUMANTHOcomplexsubunit6homologOS=HomosapiensGN=THOC6PE=1SV=1	sp|Q86W42|THOC6_HUMANTHOcomplexsubunit6homologOS=HomosapiensGN=THOC6PE=1SV=1	9613700	23587000	52938000	1	0	0	0	9613700	23587000	52938000	7	7	7		1	7	7	7	1	0	1	5	3	3	1	0	1	5	3	3	1	0	1	5	3	3	26.4	26.4	26.4	37.535	341	341	0	87.27	4.1	0	4.7	20.2
tr|Q5QPL9|Q5QPL9_HUMANRNA-bindingproteinRaly(Fragment)OS=HomosapiensGN=RALYPE=1SV=1;sp|Q9UKM9|RALY_HUMANRNA-bindingproteinRalyOS=HomosapiensGN=RALYPE=1SV=1;tr|Q5QPM1|Q5QPM1_HUMANRNA-bindingproteinRaly(Fragment)OS=HomosapiensGN=RALYPE=1SV=1;tr|Q5QPM2|Q5QPM2_HUMANRNA-bindingproteinRaly(Fragment)OS=HomosapiensGN=RALYPE=1SV=1;tr|Q5QPM0|Q5QPM0_HUMANRNA-bindingproteinRaly(Fragment)OS=HomosapiensGN=RALY…	tr|Q5QPL9|Q5QPL9_HUMANRNA-bindingproteinRaly(Fragment)OS=HomosapiensGN=RALYPE=1SV=1;sp|Q9UKM9|RALY_HUMANRNA-bindingproteinRalyOS=HomosapiensGN=RALYPE=1SV=1;tr|Q5QPM1|Q5QPM1_HUMANRNA-bindingproteinRaly(Fragment)OS=HomosapiensGN=RALYPE=1SV=1;tr|Q5QPM2|Q5QPM2_HUMANRNA-bindingproteinRaly(Fragment)OS=HomosapiensGN=RALYPE=1SV=1;tr|Q5QPM0|Q5QPM0_HUMANRNA-bindingproteinRaly(Fragment)OS=HomosapiensGN=RALY…	95042000	48377000	37641000	1	0	0	0	95042000	48377000	37641000	8;8;6;4;4	8;8;6;4;4	8;8;6;4;4	;;;;	5	8	8	8	0	0	0	8	3	3	0	0	0	8	3	3	0	0	0	8	3	3	32.9	32.9	32.9	24.665	237	237;306;181;89;172	0	76.733	0	0	0	32.9
sp|O75367|H2AY_HUMANCorehistonemacro-H2A.1OS=HomosapiensGN=H2AFYPE=1SV=4;tr|B4DJC3|B4DJC3_HUMANHistoneH2AOS=HomosapiensGN=H2AFYPE=1SV=1;tr|D6RCF2|D6RCF2_HUMANHistoneH2AOS=HomosapiensGN=H2AFYPE=1SV=1	sp|O75367|H2AY_HUMANCorehistonemacro-H2A.1OS=HomosapiensGN=H2AFYPE=1SV=4;tr|B4DJC3|B4DJC3_HUMANHistoneH2AOS=HomosapiensGN=H2AFYPE=1SV=1	0	36133000	36894000	1	0	0	0	0	36133000	36894000	6;4;1	6;4;1	6;4;1	;	3	6	6	6	0	0	0	0	6	2	0	0	0	0	6	2	0	0	0	0	6	2	26.1	26.1	26.1	39.617	372	372;200;165	0	37.85	0	0	0	0
sp|Q9Y2P8|RCL1_HUMANRNA3'-terminalphosphatecyclase-likeproteinOS=HomosapiensGN=RCL1PE=1SV=3;tr|Q5VYW8|Q5VYW8_HUMANRNA3'-terminalphosphatecyclase-likeproteinOS=HomosapiensGN=RCL1PE=1SV=1;tr|Q5VZU3|Q5VZU3_HUMANRNA3'-terminalphosphatecyclase-likeprotein(Fragment)OS=HomosapiensGN=RCL1PE=1SV=1;tr|A0A087X1L9|A0A087X1L9_HUMANRNA3'-terminalphosphatecyclase-likeproteinOS=HomosapiensGN=RCL1PE=1SV=1;tr|Q5VZ…	sp|Q9Y2P8|RCL1_HUMANRNA3'-terminalphosphatecyclase-likeproteinOS=HomosapiensGN=RCL1PE=1SV=3	17244000	22877000	35486000	1	0	0	0	17244000	22877000	35486000	8;3;3;3;1	8;3;3;3;1	8;3;3;3;1		5	8	8	8	0	0	0	6	4	4	0	0	0	6	4	4	0	0	0	6	4	4	22	22	22	40.842	373	373;175;182;215;138	0	70.002	0	0	0	18.8
tr|A0A087X0X3|A0A087X0X3_HUMANHeterogeneousnuclearribonucleoproteinMOS=HomosapiensGN=HNRNPMPE=1SV=1;sp|P52272|HNRPM_HUMANHeterogeneousnuclearribonucleoproteinMOS=HomosapiensGN=HNRNPMPE=1SV=3;tr|M0R019|M0R019_HUMANHeterogeneousnuclearribonucleoproteinM(Fragment)OS=HomosapiensGN=HNRNPMPE=1SV=5;tr|M0QYQ7|M0QYQ7_HUMANHeterogeneousnuclearribonucleoproteinM(Fragment)OS=HomosapiensGN=HNRNPMPE=1SV=1;tr|M…	tr|A0A087X0X3|A0A087X0X3_HUMANHeterogeneousnuclearribonucleoproteinMOS=HomosapiensGN=HNRNPMPE=1SV=1;sp|P52272|HNRPM_HUMANHeterogeneousnuclearribonucleoproteinMOS=HomosapiensGN=HNRNPMPE=1SV=3;tr|M0R019|M0R019_HUMANHeterogeneousnuclearribonucleoproteinM(Fragment)OS=HomosapiensGN=HNRNPMPE=1SV=5	15624000	18306000	31140000	1	0	0	0	15624000	18306000	31140000	7;7;4;3;3;2;2;2;2;1	7;7;4;3;3;2;2;2;2;1	7;7;4;3;3;2;2;2;2;1	;;	10	7	7	7	0	1	3	2	3	3	0	1	3	2	3	3	0	1	3	2	3	3	13.3	13.3	13.3	77.569	730	730;730;353;219;357;99;116;214;276;383	0	86.53	0	1.2	4.9	3.7
sp|O95478|NSA2_HUMANRibosomebiogenesisproteinNSA2homologOS=HomosapiensGN=NSA2PE=1SV=1;tr|A0A0A0MQZ6|A0A0A0MQZ6_HUMANRibosomebiogenesisproteinNSA2homologOS=HomosapiensGN=NSA2PE=1SV=1	sp|O95478|NSA2_HUMANRibosomebiogenesisproteinNSA2homologOS=HomosapiensGN=NSA2PE=1SV=1;tr|A0A0A0MQZ6|A0A0A0MQZ6_HUMANRibosomebiogenesisproteinNSA2homologOS=HomosapiensGN=NSA2PE=1SV=1	0	25461000	27650000	1	0	0	0	0	25461000	27650000	4;2	4;2	4;2	;	2	4	4	4	1	0	0	0	3	3	1	0	0	0	3	3	1	0	0	0	3	3	18.8	18.8	18.8	30.065	260	260;189	0	31.875	3.8	0	0	0
tr|E7EPB3|E7EPB3_HUMAN60SribosomalproteinL14OS=HomosapiensGN=RPL14PE=1SV=1;sp|P50914|RL14_HUMAN60SribosomalproteinL14OS=HomosapiensGN=RPL14PE=1SV=4	tr|E7EPB3|E7EPB3_HUMAN60SribosomalproteinL14OS=HomosapiensGN=RPL14PE=1SV=1;sp|P50914|RL14_HUMAN60SribosomalproteinL14OS=HomosapiensGN=RPL14PE=1SV=4	0	21465000	24455000	1	0	0	0	0	21465000	24455000	2;2	2;2	2;2	;	2	2	2	2	1	0	0	1	1	2	1	0	0	1	1	2	1	0	0	1	1	2	19.4	19.4	19.4	14.558	124	124;215	0	15.523	9.7	0	0	9.7
sp|P51991|ROA3_HUMANHeterogeneousnuclearribonucleoproteinA3OS=HomosapiensGN=HNRNPA3PE=1SV=2;tr|H7C1J8|H7C1J8_HUMANHeterogeneousnuclearribonucleoproteinA3(Fragment)OS=HomosapiensGN=HNRNPA3PE=1SV=1	sp|P51991|ROA3_HUMANHeterogeneousnuclearribonucleoproteinA3OS=HomosapiensGN=HNRNPA3PE=1SV=2	0	31486000	23916000	1	0	0	0	0	31486000	23916000	6;1	6;1	6;1		2	6	6	6	0	0	0	1	3	4	0	0	0	1	3	4	0	0	0	1	3	4	24.3	24.3	24.3	39.594	378	378;115	0	55.04	0	0	0	3.4
sp|O43143|DHX15_HUMANPre-mRNA-splicingfactorATP-dependentRNAhelicaseDHX15OS=HomosapiensGN=DHX15PE=1SV=2	sp|O43143|DHX15_HUMANPre-mRNA-splicingfactorATP-dependentRNAhelicaseDHX15OS=HomosapiensGN=DHX15PE=1SV=2	0	19557000	22991000	1	0	0	0	0	19557000	22991000	9	9	9		1	9	9	9	2	2	3	0	2	3	2	2	3	0	2	3	2	2	3	0	2	3	15.2	15.2	15.2	90.932	795	795	0	63.648	2.6	3.4	5.8	0
tr|E7EQV9|E7EQV9_HUMANRibosomalproteinL15(Fragment)OS=HomosapiensGN=RPL15PE=1SV=1;sp|P61313|RL15_HUMAN60SribosomalproteinL15OS=HomosapiensGN=RPL15PE=1SV=2;tr|E7EX53|E7EX53_HUMANRibosomalproteinL15(Fragment)OS=HomosapiensGN=RPL15PE=1SV=1;tr|E7ENU7|E7ENU7_HUMANRibosomalproteinL15(Fragment)OS=HomosapiensGN=RPL15PE=1SV=1;tr|E7ERA2|E7ERA2_HUMANRibosomalproteinL15OS=HomosapiensGN=RPL15PE=1SV=1	tr|E7EQV9|E7EQV9_HUMANRibosomalproteinL15(Fragment)OS=HomosapiensGN=RPL15PE=1SV=1;sp|P61313|RL15_HUMAN60SribosomalproteinL15OS=HomosapiensGN=RPL15PE=1SV=2;tr|E7EX53|E7EX53_HUMANRibosomalproteinL15(Fragment)OS=HomosapiensGN=RPL15PE=1SV=1;tr|E7ENU7|E7ENU7_HUMANRibosomalproteinL15(Fragment)OS=HomosapiensGN=RPL15PE=1SV=1	0	16199000	21561000	1	0	0	0	0	16199000	21561000	4;4;3;3;1	4;4;3;3;1	4;4;3;3;1	;;;	5	4	4	4	0	0	0	2	3	3	0	0	0	2	3	3	0	0	0	2	3	3	24.1	24.1	24.1	20.51	174	174;204;133;175;59	0	36.132	0	0	0	12.1
tr|H3BR27|H3BR27_HUMANRNA-bindingmotifprotein,XchromosomeOS=HomosapiensGN=RBMXPE=1SV=1;tr|H0Y6E7|H0Y6E7_HUMANRNA-bindingmotifprotein,Xchromosome(Fragment)OS=HomosapiensGN=RBMXPE=1SV=2;tr|H3BT71|H3BT71_HUMANRNA-bindingmotifprotein,XchromosomeOS=HomosapiensGN=RBMXPE=1SV=1;sp|P38159|RBMX_HUMANRNA-bindingmotifprotein,XchromosomeOS=HomosapiensGN=RBMXPE=1SV=3;sp|Q96E39|RMXL1_HUMANRNAbindingmotifprotein…	tr|H3BR27|H3BR27_HUMANRNA-bindingmotifprotein,XchromosomeOS=HomosapiensGN=RBMXPE=1SV=1;tr|H0Y6E7|H0Y6E7_HUMANRNA-bindingmotifprotein,Xchromosome(Fragment)OS=HomosapiensGN=RBMXPE=1SV=2;tr|H3BT71|H3BT71_HUMANRNA-bindingmotifprotein,XchromosomeOS=HomosapiensGN=RBMXPE=1SV=1;sp|P38159|RBMX_HUMANRNA-bindingmotifprotein,XchromosomeOS=HomosapiensGN=RBMXPE=1SV=3;sp|Q96E39|RMXL1_HUMANRNAbindingmotifprotein…	0	19691000	20583000	1	0	0	0	0	19691000	20583000	3;3;3;3;2;2;1;1	3;3;3;3;2;2;1;1	3;3;3;3;2;2;1;1	;;;;;	8	3	3	3	0	0	0	0	3	3	0	0	0	0	3	3	0	0	0	0	3	3	44.9	44.9	44.9	8.6098	78	78;292;296;391;390;392;37;1067	0	20.024	0	0	0	0
tr|F8W6I7|F8W6I7_HUMANHeterogeneousnuclearribonucleoproteinA1OS=HomosapiensGN=HNRNPA1PE=1SV=2;sp|P09651|ROA1_HUMANHeterogeneousnuclearribonucleoproteinA1OS=HomosapiensGN=HNRNPA1PE=1SV=5;sp|Q32P51|RA1L2_HUMANHeterogeneousnuclearribonucleoproteinA1-like2OS=HomosapiensGN=HNRNPA1L2PE=2SV=2;tr|F8VZ49|F8VZ49_HUMANHeterogeneousnuclearribonucleoproteinA1(Fragment)OS=HomosapiensGN=HNRNPA1PE=1SV=1;tr|F8VTQ…	tr|F8W6I7|F8W6I7_HUMANHeterogeneousnuclearribonucleoproteinA1OS=HomosapiensGN=HNRNPA1PE=1SV=2;sp|P09651|ROA1_HUMANHeterogeneousnuclearribonucleoproteinA1OS=HomosapiensGN=HNRNPA1PE=1SV=5;sp|Q32P51|RA1L2_HUMANHeterogeneousnuclearribonucleoproteinA1-like2OS=HomosapiensGN=HNRNPA1L2PE=2SV=2;tr|F8VZ49|F8VZ49_HUMANHeterogeneousnuclearribonucleoproteinA1(Fragment)OS=HomosapiensGN=HNRNPA1PE=1SV=1;tr|F8VTQ…	10859000	41800000	20269000	1	0	0	0	10859000	41800000	20269000	8;8;7;6;5;4;3;3	8;8;7;6;5;4;3;3	8;8;7;6;5;4;3;3	;;;;;	8	8	8	8	1	0	0	7	4	4	1	0	0	7	4	4	1	0	0	7	4	4	25.7	25.7	25.7	33.155	307	307;372;320;231;145;191;113;156	0	68.311	3.3	0	0	25.1
sp|P22626|ROA2_HUMANHeterogeneousnuclearribonucleoproteinsA2/B1OS=HomosapiensGN=HNRNPA2B1PE=1SV=2;tr|A0A087WUI2|A0A087WUI2_HUMANHeterogeneousnuclearribonucleoproteinsA2/B1OS=HomosapiensGN=HNRNPA2B1PE=1SV=1	sp|P22626|ROA2_HUMANHeterogeneousnuclearribonucleoproteinsA2/B1OS=HomosapiensGN=HNRNPA2B1PE=1SV=2;tr|A0A087WUI2|A0A087WUI2_HUMANHeterogeneousnuclearribonucleoproteinsA2/B1OS=HomosapiensGN=HNRNPA2B1PE=1SV=1	48836000	21000000	19787000	1	0	0	0	48836000	21000000	19787000	8;5	8;5	8;5	;	2	8	8	8	0	1	1	4	5	5	0	1	1	4	5	5	0	1	1	4	5	5	30.6	30.6	30.6	37.429	353	353;261	0	66.005	0	4.2	4.2	13.6
tr|K7EJH3|K7EJH3_HUMANSplicingfactorU2AF26kDasubunitOS=HomosapiensGN=U2AF1L4PE=4SV=1;tr|K7EJM7|K7EJM7_HUMANSplicingfactorU2AF26kDasubunitOS=HomosapiensGN=U2AF1L4PE=4SV=1;tr|M0QYK5|M0QYK5_HUMANSplicingfactorU2AF26kDasubunitOS=HomosapiensGN=U2AF1L4PE=4SV=1;tr|M0R2N4|M0R2N4_HUMANUncharacterizedproteinOS=HomosapiensPE=4SV=1;sp|Q8WU68|U2AF4_HUMANSplicingfactorU2AF26kDasubunitOS=HomosapiensGN=U2AF1L4PE…	tr|K7EJH3|K7EJH3_HUMANSplicingfactorU2AF26kDasubunitOS=HomosapiensGN=U2AF1L4PE=4SV=1;tr|K7EJM7|K7EJM7_HUMANSplicingfactorU2AF26kDasubunitOS=HomosapiensGN=U2AF1L4PE=4SV=1;tr|M0QYK5|M0QYK5_HUMANSplicingfactorU2AF26kDasubunitOS=HomosapiensGN=U2AF1L4PE=4SV=1;tr|M0R2N4|M0R2N4_HUMANUncharacterizedproteinOS=HomosapiensPE=4SV=1;sp|Q8WU68|U2AF4_HUMANSplicingfactorU2AF26kDasubunitOS=HomosapiensGN=U2AF1L4PE…	0	0	19283000	1	0	0	0	0	0	19283000	1;1;1;1;1;1	1;1;1;1;1;1	1;1;1;1;1;1	;;;;;	6	1	1	1	0	0	1	1	1	1	0	0	1	1	1	1	0	0	1	1	1	1	30.8	30.8	30.8	3.8602	39	39;51;66;97;220;240	0	30.509	0	0	30.8	30.8
sp|P05386|RLA1_HUMAN60SacidicribosomalproteinP1OS=HomosapiensGN=RPLP1PE=1SV=1	sp|P05386|RLA1_HUMAN60SacidicribosomalproteinP1OS=HomosapiensGN=RPLP1PE=1SV=1	0	0	17485000	1	0	0	0	0	0	17485000	1	1	1		1	1	1	1	0	0	1	0	1	1	0	0	1	0	1	1	0	0	1	0	1	1	14	14	14	11.514	114	114	0	47.808	0	0	14	0
tr|H3BRU6|H3BRU6_HUMANPoly(rC)-bindingprotein2(Fragment)OS=HomosapiensGN=PCBP2PE=1SV=1;tr|F8VZX2|F8VZX2_HUMANPoly(rC)-bindingprotein2OS=HomosapiensGN=PCBP2PE=1SV=1;sp|Q15366|PCBP2_HUMANPoly(rC)-bindingprotein2OS=HomosapiensGN=PCBP2PE=1SV=1;tr|F8W0G4|F8W0G4_HUMANPoly(rC)-bindingprotein2(Fragment)OS=HomosapiensGN=PCBP2PE=1SV=1;tr|F8VXH9|F8VXH9_HUMANPoly(rC)-bindingprotein2(Fragment)OS=HomosapiensGN…	tr|H3BRU6|H3BRU6_HUMANPoly(rC)-bindingprotein2(Fragment)OS=HomosapiensGN=PCBP2PE=1SV=1;tr|F8VZX2|F8VZX2_HUMANPoly(rC)-bindingprotein2OS=HomosapiensGN=PCBP2PE=1SV=1;sp|Q15366|PCBP2_HUMANPoly(rC)-bindingprotein2OS=HomosapiensGN=PCBP2PE=1SV=1;tr|F8W0G4|F8W0G4_HUMANPoly(rC)-bindingprotein2(Fragment)OS=HomosapiensGN=PCBP2PE=1SV=1;tr|F8VXH9|F8VXH9_HUMANPoly(rC)-bindingprotein2(Fragment)OS=HomosapiensGN…	11732000	28439000	15913000	1	0	0	0	11732000	28439000	15913000	3;3;3;2;2;1;1;1;1;1;1	3;3;3;2;2;1;1;1;1;1;1	2;2;2;1;1;1;1;1;0;0;0	;;;;	11	3	3	2	0	1	1	2	2	3	0	1	1	2	2	3	0	1	1	1	1	2	14.6	14.6	8	31.6	301	301;321;365;158;160;184;202;310;322;361;371	0	33.374	0	4.3	4.3	10.3
sp|Q8IY81|SPB1_HUMANpre-rRNAprocessingproteinFTSJ3OS=HomosapiensGN=FTSJ3PE=1SV=2	sp|Q8IY81|SPB1_HUMANpre-rRNAprocessingproteinFTSJ3OS=HomosapiensGN=FTSJ3PE=1SV=2	0	13953000	14908000	1	0	0	0	0	13953000	14908000	2	2	2		1	2	2	2	0	0	0	1	1	1	0	0	0	1	1	1	0	0	0	1	1	1	3	3	3	96.557	847	847	0	22.797	0	0	0	0.9
sp|P62906|RL10A_HUMAN60SribosomalproteinL10aOS=HomosapiensGN=RPL10APE=1SV=2	sp|P62906|RL10A_HUMAN60SribosomalproteinL10aOS=HomosapiensGN=RPL10APE=1SV=2	0	13654000	14028000	1	0	0	0	0	13654000	14028000	5	5	5		1	5	5	5	2	0	0	1	4	3	2	0	0	1	4	3	2	0	0	1	4	3	19.8	19.8	19.8	24.831	217	217	0	28.814	9.7	0	0	6
sp|Q07955|SRSF1_HUMANSerine/arginine-richsplicingfactor1OS=HomosapiensGN=SRSF1PE=1SV=2;tr|J3KTL2|J3KTL2_HUMANSerine/arginine-rich-splicingfactor1OS=HomosapiensGN=SRSF1PE=1SV=1;tr|J3QQV5|J3QQV5_HUMANSerine/arginine-rich-splicingfactor1OS=HomosapiensGN=SRSF1PE=1SV=1;tr|J3KSW7|J3KSW7_HUMANSerine/arginine-rich-splicingfactor1OS=HomosapiensGN=SRSF1PE=1SV=1;tr|J3KSR8|J3KSR8_HUMANSerine/arginine-rich-sp…	sp|Q07955|SRSF1_HUMANSerine/arginine-richsplicingfactor1OS=HomosapiensGN=SRSF1PE=1SV=2;tr|J3KTL2|J3KTL2_HUMANSerine/arginine-rich-splicingfactor1OS=HomosapiensGN=SRSF1PE=1SV=1	0	13523000	13114000	1	0	0	0	0	13523000	13114000	5;5;2;2;2	5;5;2;2;2	5;5;2;2;2	;	5	5	5	5	2	0	0	1	3	3	2	0	0	1	3	3	2	0	0	1	3	3	19.4	19.4	19.4	27.744	248	248;253;65;73;143	0	30.989	7.3	0	0	4
sp|Q5VTL8|PR38B_HUMANPre-mRNA-splicingfactor38BOS=HomosapiensGN=PRPF38BPE=1SV=1;tr|A0A0A0MRN0|A0A0A0MRN0_HUMANPRP38pre-mRNAprocessingfactor38(Yeast)domaincontainingB,isoformCRA_bOS=HomosapiensGN=PRPF38BPE=1SV=1	sp|Q5VTL8|PR38B_HUMANPre-mRNA-splicingfactor38BOS=HomosapiensGN=PRPF38BPE=1SV=1;tr|A0A0A0MRN0|A0A0A0MRN0_HUMANPRP38pre-mRNAprocessingfactor38(Yeast)domaincontainingB,isoformCRA_bOS=HomosapiensGN=PRPF38BPE=1SV=1	0	0	13097000	1	0	0	0	0	0	13097000	4;3	4;3	4;3	;	2	4	4	4	0	0	0	1	2	3	0	0	0	1	2	3	0	0	0	1	2	3	8.2	8.2	8.2	64.467	546	546;435	0	27.024	0	0	0	2.2
sp|P40429|RL13A_HUMAN60SribosomalproteinL13aOS=HomosapiensGN=RPL13APE=1SV=2;tr|M0QYS1|M0QYS1_HUMAN60SribosomalproteinL13a(Fragment)OS=HomosapiensGN=RPL13APE=1SV=2;tr|M0QZU1|M0QZU1_HUMAN60SribosomalproteinL13aOS=HomosapiensGN=RPL13APE=1SV=1;tr|A0A096LPE0|A0A096LPE0_HUMAN60SribosomalproteinL13aOS=HomosapiensGN=RPL13APE=1SV=1;sp|Q6NVV1|R13P3_HUMANPutative60SribosomalproteinL13aproteinRPL13AP3OS=Homo…	sp|P40429|RL13A_HUMAN60SribosomalproteinL13aOS=HomosapiensGN=RPL13APE=1SV=2;tr|M0QYS1|M0QYS1_HUMAN60SribosomalproteinL13a(Fragment)OS=HomosapiensGN=RPL13APE=1SV=2;tr|M0QZU1|M0QZU1_HUMAN60SribosomalproteinL13aOS=HomosapiensGN=RPL13APE=1SV=1;tr|A0A096LPE0|A0A096LPE0_HUMAN60SribosomalproteinL13aOS=HomosapiensGN=RPL13APE=1SV=1;sp|Q6NVV1|R13P3_HUMANPutative60SribosomalproteinL13aproteinRPL13AP3OS=Homo…	0	12508000	11974000	1	0	0	0	0	12508000	11974000	4;3;2;2;2;2	4;3;2;2;2;2	4;3;2;2;2;2	;;;;;	6	4	4	4	0	0	0	0	4	2	0	0	0	0	4	2	0	0	0	0	4	2	19.7	19.7	19.7	23.577	203	203;210;46;48;102;142	0	25.463	0	0	0	0
tr|I3L1L3|I3L1L3_HUMANMyb-bindingprotein1A(Fragment)OS=HomosapiensGN=MYBBP1APE=1SV=1;sp|Q9BQG0|MBB1A_HUMANMyb-bindingprotein1AOS=HomosapiensGN=MYBBP1APE=1SV=2	tr|I3L1L3|I3L1L3_HUMANMyb-bindingprotein1A(Fragment)OS=HomosapiensGN=MYBBP1APE=1SV=1;sp|Q9BQG0|MBB1A_HUMANMyb-bindingprotein1AOS=HomosapiensGN=MYBBP1APE=1SV=2	0	9465400	11915000	1	0	0	0	0	9465400	11915000	5;5	5;5	5;5	;	2	5	5	5	0	0	0	0	4	4	0	0	0	0	4	4	0	0	0	0	4	4	5.2	5.2	5.2	140.13	1252	1252;1328	0	29.876	0	0	0	0
tr|J3QR09|J3QR09_HUMANRibosomalproteinL19OS=HomosapiensGN=RPL19PE=1SV=1;tr|J3KTE4|J3KTE4_HUMANRibosomalproteinL19OS=HomosapiensGN=RPL19PE=1SV=1;sp|P84098|RL19_HUMAN60SribosomalproteinL19OS=HomosapiensGN=RPL19PE=1SV=1;tr|J3QL15|J3QL15_HUMANRibosomalproteinL19(Fragment)OS=HomosapiensGN=RPL19PE=1SV=1	tr|J3QR09|J3QR09_HUMANRibosomalproteinL19OS=HomosapiensGN=RPL19PE=1SV=1;tr|J3KTE4|J3KTE4_HUMANRibosomalproteinL19OS=HomosapiensGN=RPL19PE=1SV=1;sp|P84098|RL19_HUMAN60SribosomalproteinL19OS=HomosapiensGN=RPL19PE=1SV=1;tr|J3QL15|J3QL15_HUMANRibosomalproteinL19(Fragment)OS=HomosapiensGN=RPL19PE=1SV=1	0	16133000	11841000	1	0	0	0	0	16133000	11841000	2;2;2;1	2;2;2;1	2;2;2;1	;;;	4	2	2	2	0	0	0	1	2	2	0	0	0	1	2	2	0	0	0	1	2	2	13.5	13.5	13.5	23.134	193	193;194;196;128	0	23.089	0	0	0	8.8
sp|Q9Y3A4|RRP7A_HUMANRibosomalRNA-processingprotein7homologAOS=HomosapiensGN=RRP7APE=1SV=2	sp|Q9Y3A4|RRP7A_HUMANRibosomalRNA-processingprotein7homologAOS=HomosapiensGN=RRP7APE=1SV=2	0	9920700	11569000	1	0	0	0	0	9920700	11569000	5	5	5		1	5	5	5	0	0	0	1	2	5	0	0	0	1	2	5	0	0	0	1	2	5	20.7	20.7	20.7	32.334	280	280	0	31.93	0	0	0	4.6
tr|J3KT86|J3KT86_HUMANAurorakinaseB(Fragment)OS=HomosapiensGN=AURKBPE=1SV=1;sp|Q96GD4|AURKB_HUMANAurorakinaseBOS=HomosapiensGN=AURKBPE=1SV=3;tr|J3QLN8|J3QLN8_HUMANAurorakinaseB(Fragment)OS=HomosapiensGN=AURKBPE=1SV=5;tr|J3QR41|J3QR41_HUMANAurorakinaseB(Fragment)OS=HomosapiensGN=AURKBPE=1SV=1;tr|J3KTD6|J3KTD6_HUMANAurorakinaseB(Fragment)OS=HomosapiensGN=AURKBPE=1SV=1	tr|J3KT86|J3KT86_HUMANAurorakinaseB(Fragment)OS=HomosapiensGN=AURKBPE=1SV=1;sp|Q96GD4|AURKB_HUMANAurorakinaseBOS=HomosapiensGN=AURKBPE=1SV=3;tr|J3QLN8|J3QLN8_HUMANAurorakinaseB(Fragment)OS=HomosapiensGN=AURKBPE=1SV=5	0	0	9391700	1	0	0	0	0	0	9391700	3;3;2;1;1	3;3;2;1;1	3;3;2;1;1	;;	5	3	3	3	0	0	0	0	1	3	0	0	0	0	1	3	0	0	0	0	1	3	16.1	16.1	16.1	27.956	242	242;344;231;172;228	0	20.033	0	0	0	0
sp|P52597|HNRPF_HUMANHeterogeneousnuclearribonucleoproteinFOS=HomosapiensGN=HNRNPFPE=1SV=3	sp|P52597|HNRPF_HUMANHeterogeneousnuclearribonucleoproteinFOS=HomosapiensGN=HNRNPFPE=1SV=3	0	0	9077500	1	0	0	0	0	0	9077500	6	4	4		1	6	4	4	3	4	3	3	3	4	1	2	1	1	1	2	1	2	1	1	1	2	19.5	13	13	45.671	415	415	0	27.398	10.6	12.5	9.6	10.4
sp|Q13868|EXOS2_HUMANExosomecomplexcomponentRRP4OS=HomosapiensGN=EXOSC2PE=1SV=2;tr|A3KFL1|A3KFL1_HUMANExosomecomplexcomponentRRP4(Fragment)OS=HomosapiensGN=EXOSC2PE=1SV=1;tr|A3KFL5|A3KFL5_HUMANExosomecomplexcomponentRRP4(Fragment)OS=HomosapiensGN=EXOSC2PE=1SV=2;tr|A3KFL2|A3KFL2_HUMANExosomecomplexcomponentRRP4OS=HomosapiensGN=EXOSC2PE=1SV=1	sp|Q13868|EXOS2_HUMANExosomecomplexcomponentRRP4OS=HomosapiensGN=EXOSC2PE=1SV=2;tr|A3KFL1|A3KFL1_HUMANExosomecomplexcomponentRRP4(Fragment)OS=HomosapiensGN=EXOSC2PE=1SV=1;tr|A3KFL5|A3KFL5_HUMANExosomecomplexcomponentRRP4(Fragment)OS=HomosapiensGN=EXOSC2PE=1SV=2;tr|A3KFL2|A3KFL2_HUMANExosomecomplexcomponentRRP4OS=HomosapiensGN=EXOSC2PE=1SV=1	0	23005000	8671100	1	0	0	0	0	23005000	8671100	3;2;2;2	3;2;2;2	3;2;2;2	;;;	4	3	3	3	1	0	0	0	2	3	1	0	0	0	2	3	1	0	0	0	2	3	13	13	13	32.789	293	293;200;237;285	0	27.941	3.8	0	0	0
sp|Q96MG7|MAGG1_HUMANMelanoma-associatedantigenG1OS=HomosapiensGN=NDNL2PE=1SV=1	sp|Q96MG7|MAGG1_HUMANMelanoma-associatedantigenG1OS=HomosapiensGN=NDNL2PE=1SV=1	0	0	8637300	1	0	0	0	0	0	8637300	3	3	3		1	3	3	3	0	0	0	2	1	1	0	0	0	2	1	1	0	0	0	2	1	1	8.6	8.6	8.6	34.308	304	304	0	30.772	0	0	0	4.9
sp|Q9P013|CWC15_HUMANSpliceosome-associatedproteinCWC15homologOS=HomosapiensGN=CWC15PE=1SV=2	sp|Q9P013|CWC15_HUMANSpliceosome-associatedproteinCWC15homologOS=HomosapiensGN=CWC15PE=1SV=2	0	0	8521800	1	0	0	0	0	0	8521800	1	1	1		1	1	1	1	0	0	0	0	1	1	0	0	0	0	1	1	0	0	0	0	1	1	10.5	10.5	10.5	26.624	229	229	0	11.09	0	0	0	0
sp|Q9ULR0|ISY1_HUMANPre-mRNA-splicingfactorISY1homologOS=HomosapiensGN=ISY1PE=1SV=3;tr|D6RC18|D6RC18_HUMANPre-mRNA-splicingfactorISY1homologOS=HomosapiensGN=ISY1PE=1SV=1;tr|A8MVI5|A8MVI5_HUMANPre-mRNA-splicingfactorISY1homologOS=HomosapiensGN=ISY1PE=1SV=1	sp|Q9ULR0|ISY1_HUMANPre-mRNA-splicingfactorISY1homologOS=HomosapiensGN=ISY1PE=1SV=3;tr|D6RC18|D6RC18_HUMANPre-mRNA-splicingfactorISY1homologOS=HomosapiensGN=ISY1PE=1SV=1;tr|A8MVI5|A8MVI5_HUMANPre-mRNA-splicingfactorISY1homologOS=HomosapiensGN=ISY1PE=1SV=1	0	0	8430200	1	0	0	0	0	0	8430200	2;1;1	2;1;1	2;1;1	;;	3	2	2	2	0	0	0	0	1	2	0	0	0	0	1	2	0	0	0	0	1	2	11.2	11.2	11.2	32.992	285	285;124;252	0	13.535	0	0	0	0
sp|Q96QD9|UIF_HUMANUAP56-interactingfactorOS=HomosapiensGN=FYTTD1PE=1SV=3;tr|H9KVC6|H9KVC6_HUMANUAP56-interactingfactor(Fragment)OS=HomosapiensGN=FYTTD1PE=1SV=5;tr|H9KVC1|H9KVC1_HUMANUAP56-interactingfactor(Fragment)OS=HomosapiensGN=FYTTD1PE=1SV=1;tr|H9KVD1|H9KVD1_HUMANUAP56-interactingfactorOS=HomosapiensGN=FYTTD1PE=1SV=1;tr|H9KVD5|H9KVD5_HUMANUAP56-interactingfactor(Fragment)OS=HomosapiensGN=FY…	sp|Q96QD9|UIF_HUMANUAP56-interactingfactorOS=HomosapiensGN=FYTTD1PE=1SV=3;tr|H9KVC6|H9KVC6_HUMANUAP56-interactingfactor(Fragment)OS=HomosapiensGN=FYTTD1PE=1SV=5	40454000	0	8005200	1	0	0	0	40454000	0	8005200	7;4;2;1;1	7;4;2;1;1	7;4;2;1;1	;	5	7	7	7	0	0	0	7	1	2	0	0	0	7	1	2	0	0	0	7	1	2	25.2	25.2	25.2	35.818	318	318;177;71;121;126	0	83.237	0	0	0	25.2
sp|O60832|DKC1_HUMANH/ACAribonucleoproteincomplexsubunit4OS=HomosapiensGN=DKC1PE=1SV=3;tr|H7BZF2|H7BZF2_HUMANH/ACAribonucleoproteincomplexsubunit4(Fragment)OS=HomosapiensGN=DKC1PE=1SV=1;tr|H7C0M1|H7C0M1_HUMANH/ACAribonucleoproteincomplexsubunit4(Fragment)OS=HomosapiensGN=DKC1PE=1SV=1;tr|C9IYT0|C9IYT0_HUMANH/ACAribonucleoproteincomplexsubunit4(Fragment)OS=HomosapiensGN=DKC1PE=1SV=5	sp|O60832|DKC1_HUMANH/ACAribonucleoproteincomplexsubunit4OS=HomosapiensGN=DKC1PE=1SV=3;tr|H7BZF2|H7BZF2_HUMANH/ACAribonucleoproteincomplexsubunit4(Fragment)OS=HomosapiensGN=DKC1PE=1SV=1;tr|H7C0M1|H7C0M1_HUMANH/ACAribonucleoproteincomplexsubunit4(Fragment)OS=HomosapiensGN=DKC1PE=1SV=1;tr|C9IYT0|C9IYT0_HUMANH/ACAribonucleoproteincomplexsubunit4(Fragment)OS=HomosapiensGN=DKC1PE=1SV=5	0	0	7318600	1	0	0	0	0	0	7318600	2;1;1;1	2;1;1;1	2;1;1;1	;;;	4	2	2	2	0	0	0	1	0	1	0	0	0	1	0	1	0	0	0	1	0	1	5.8	5.8	5.8	57.673	514	514;76;229;259	0	12.164	0	0	0	1.9
tr|B1AN99|B1AN99_HUMANTrypsin-3(Fragment)OS=HomosapiensGN=PRSS3PE=1SV=5;sp|P35030|TRY3_HUMANTrypsin-3OS=HomosapiensGN=PRSS3PE=1SV=2	tr|B1AN99|B1AN99_HUMANTrypsin-3(Fragment)OS=HomosapiensGN=PRSS3PE=1SV=5;sp|P35030|TRY3_HUMANTrypsin-3OS=HomosapiensGN=PRSS3PE=1SV=2	0	0	7270600	1	0	0	0	0	0	7270600	1;1	1;1	1;1	;	2	1	1	1	1	0	0	1	1	1	1	0	0	1	1	1	1	0	0	1	1	1	7.3	7.3	7.3	19.401	178	178;304	0	13.808	7.3	0	0	7.3
sp|Q9H9L3|I20L2_HUMANInterferon-stimulated20kDaexonuclease-like2OS=HomosapiensGN=ISG20L2PE=1SV=1	sp|Q9H9L3|I20L2_HUMANInterferon-stimulated20kDaexonuclease-like2OS=HomosapiensGN=ISG20L2PE=1SV=1	0	0	7260000	1	0	0	0	0	0	7260000	1	1	1		1	1	1	1	0	0	0	0	1	1	0	0	0	0	1	1	0	0	0	0	1	1	3.7	3.7	3.7	39.153	353	353	0	7.3227	0	0	0	0
sp|Q15024|EXOS7_HUMANExosomecomplexcomponentRRP42OS=HomosapiensGN=EXOSC7PE=1SV=3	sp|Q15024|EXOS7_HUMANExosomecomplexcomponentRRP42OS=HomosapiensGN=EXOSC7PE=1SV=3	13028000	6711700	7070000	1	0	0	0	13028000	6711700	7070000	4	4	4		1	4	4	4	1	0	0	4	2	3	1	0	0	4	2	3	1	0	0	4	2	3	16.5	16.5	16.5	31.821	291	291	0	30.746	3.8	0	0	16.5
sp|P38432|COIL_HUMANCoilinOS=HomosapiensGN=COILPE=1SV=1	sp|P38432|COIL_HUMANCoilinOS=HomosapiensGN=COILPE=1SV=1	0	10667000	6804100	1	0	0	0	0	10667000	6804100	3	3	3		1	3	3	3	0	0	0	0	2	3	0	0	0	0	2	3	0	0	0	0	2	3	7.5	7.5	7.5	62.608	576	576	0	24.509	0	0	0	0
sp|Q14137|BOP1_HUMANRibosomebiogenesisproteinBOP1OS=HomosapiensGN=BOP1PE=1SV=2	sp|Q14137|BOP1_HUMANRibosomebiogenesisproteinBOP1OS=HomosapiensGN=BOP1PE=1SV=2	0	0	6267900	1	0	0	0	0	0	6267900	1	1	1		1	1	1	1	0	0	0	0	1	1	0	0	0	0	1	1	0	0	0	0	1	1	3.4	3.4	3.4	83.629	746	746	0	7.6054	0	0	0	0
sp|Q9BWF3|RBM4_HUMANRNA-bindingprotein4OS=HomosapiensGN=RBM4PE=1SV=1;tr|E9PB51|E9PB51_HUMANRNA-bindingprotein4(Fragment)OS=HomosapiensGN=RBM4PE=1SV=1;tr|E9PLB0|E9PLB0_HUMANRNA-bindingprotein4BOS=HomosapiensGN=RBM4BPE=1SV=1;tr|E9PM61|E9PM61_HUMANRNA-bindingprotein4BOS=HomosapiensGN=RBM4BPE=1SV=1;tr|D6R9K7|D6R9K7_HUMANRNA-bindingprotein4OS=HomosapiensGN=RBM4PE=1SV=1;tr|U3KQD5|U3KQD5_HUMANRNA-bindin…	sp|Q9BWF3|RBM4_HUMANRNA-bindingprotein4OS=HomosapiensGN=RBM4PE=1SV=1;tr|E9PB51|E9PB51_HUMANRNA-bindingprotein4(Fragment)OS=HomosapiensGN=RBM4PE=1SV=1	0	0	5960900	1	0	0	0	0	0	5960900	3;2;1;1;1;1;1;1	3;2;1;1;1;1;1;1	3;2;1;1;1;1;1;1	;	8	3	3	3	0	0	0	0	2	2	0	0	0	0	2	2	0	0	0	0	2	2	14.3	14.3	14.3	40.313	364	364;240;143;147;150;151;155;359	0	32.365	0	0	0	0
sp|Q9Y2R4|DDX52_HUMANProbableATP-dependentRNAhelicaseDDX52OS=HomosapiensGN=DDX52PE=1SV=3	sp|Q9Y2R4|DDX52_HUMANProbableATP-dependentRNAhelicaseDDX52OS=HomosapiensGN=DDX52PE=1SV=3	0	0	5941000	1	0	0	0	0	0	5941000	2	2	2		1	2	2	2	0	0	0	0	0	2	0	0	0	0	0	2	0	0	0	0	0	2	6	6	6	67.497	599	599	0	13.161	0	0	0	0
sp|Q5RKV6|EXOS6_HUMANExosomecomplexcomponentMTR3OS=HomosapiensGN=EXOSC6PE=1SV=1	sp|Q5RKV6|EXOS6_HUMANExosomecomplexcomponentMTR3OS=HomosapiensGN=EXOSC6PE=1SV=1	0	0	5885200	1	0	0	0	0	0	5885200	5	5	5		1	5	5	5	3	0	0	0	2	2	3	0	0	0	2	2	3	0	0	0	2	2	27.2	27.2	27.2	28.235	272	272	0	39.651	17.6	0	0	0
sp|P01859|IGHG2_HUMANIggamma-2chainCregionOS=HomosapiensGN=IGHG2PE=1SV=2;tr|A0A0G2JN06|A0A0G2JN06_HUMANUncharacterizedproteinOS=HomosapiensPE=4SV=1	sp|P01859|IGHG2_HUMANIggamma-2chainCregionOS=HomosapiensGN=IGHG2PE=1SV=2;tr|A0A0G2JN06|A0A0G2JN06_HUMANUncharacterizedproteinOS=HomosapiensPE=4SV=1	0	0	5504200	1	0	0	0	0	0	5504200	1;1	1;1	1;1	;	2	1	1	1	0	0	0	0	1	1	0	0	0	0	1	1	0	0	0	0	1	1	2.8	2.8	2.8	35.9	326	326;327	0.0058594	6.2031	0	0	0	0
tr|M0QX71|M0QX71_HUMANGlutamate-richWDrepeat-containingprotein1(Fragment)OS=HomosapiensGN=GRWD1PE=1SV=1;sp|Q9BQ67|GRWD1_HUMANGlutamate-richWDrepeat-containingprotein1OS=HomosapiensGN=GRWD1PE=1SV=1	tr|M0QX71|M0QX71_HUMANGlutamate-richWDrepeat-containingprotein1(Fragment)OS=HomosapiensGN=GRWD1PE=1SV=1;sp|Q9BQ67|GRWD1_HUMANGlutamate-richWDrepeat-containingprotein1OS=HomosapiensGN=GRWD1PE=1SV=1	0	0	5120900	1	0	0	0	0	0	5120900	1;1	1;1	1;1	;	2	1	1	1	0	0	0	0	0	1	0	0	0	0	0	1	0	0	0	0	0	1	7	7	7	25.477	228	228;446	0.0021186	6.5196	0	0	0	0
sp|Q96AG4|LRC59_HUMANLeucine-richrepeat-containingprotein59OS=HomosapiensGN=LRRC59PE=1SV=1	sp|Q96AG4|LRC59_HUMANLeucine-richrepeat-containingprotein59OS=HomosapiensGN=LRRC59PE=1SV=1	0	0	4933900	1	0	0	0	0	0	4933900	1	1	1		1	1	1	1	0	0	0	0	1	1	0	0	0	0	1	1	0	0	0	0	1	1	3.9	3.9	3.9	34.93	307	307	0	7.1476	0	0	0	0
tr|E9PJD9|E9PJD9_HUMAN60SribosomalproteinL27aOS=HomosapiensGN=RPL27APE=1SV=1;tr|E9PLL6|E9PLL6_HUMAN60SribosomalproteinL27aOS=HomosapiensGN=RPL27APE=1SV=1;sp|P46776|RL27A_HUMAN60SribosomalproteinL27aOS=HomosapiensGN=RPL27APE=1SV=2;tr|E9PLX7|E9PLX7_HUMAN60SribosomalproteinL27aOS=HomosapiensGN=RPL27APE=1SV=1	tr|E9PJD9|E9PJD9_HUMAN60SribosomalproteinL27aOS=HomosapiensGN=RPL27APE=1SV=1;tr|E9PLL6|E9PLL6_HUMAN60SribosomalproteinL27aOS=HomosapiensGN=RPL27APE=1SV=1;sp|P46776|RL27A_HUMAN60SribosomalproteinL27aOS=HomosapiensGN=RPL27APE=1SV=2;tr|E9PLX7|E9PLX7_HUMAN60SribosomalproteinL27aOS=HomosapiensGN=RPL27APE=1SV=1	0	0	4916300	1	0	0	0	0	0	4916300	2;2;2;1	2;2;2;1	2;2;2;1	;;;	4	2	2	2	0	0	0	1	1	2	0	0	0	1	1	2	0	0	0	1	1	2	23.1	23.1	23.1	10.127	91	91;108;148;113	0	13.419	0	0	0	12.1
tr|A0A0A0MSV6|A0A0A0MSV6_HUMANComplementC1qsubcomponentsubunitB(Fragment)OS=HomosapiensGN=C1QBPE=1SV=3;tr|D6R934|D6R934_HUMANComplementC1qsubcomponentsubunitBOS=HomosapiensGN=C1QBPE=1SV=1;sp|P02746|C1QB_HUMANComplementC1qsubcomponentsubunitBOS=HomosapiensGN=C1QBPE=1SV=3	tr|A0A0A0MSV6|A0A0A0MSV6_HUMANComplementC1qsubcomponentsubunitB(Fragment)OS=HomosapiensGN=C1QBPE=1SV=3;tr|D6R934|D6R934_HUMANComplementC1qsubcomponentsubunitBOS=HomosapiensGN=C1QBPE=1SV=1;sp|P02746|C1QB_HUMANComplementC1qsubcomponentsubunitBOS=HomosapiensGN=C1QBPE=1SV=3	0	0	4798900	1	0	0	0	0	0	4798900	1;1;1	1;1;1	1;1;1	;;	3	1	1	1	0	0	0	0	1	1	0	0	0	0	1	1	0	0	0	0	1	1	6.1	6.1	6.1	24.117	229	229;251;253	0	7.1565	0	0	0	0
sp|Q13247|SRSF6_HUMANSerine/arginine-richsplicingfactor6OS=HomosapiensGN=SRSF6PE=1SV=2	sp|Q13247|SRSF6_HUMANSerine/arginine-richsplicingfactor6OS=HomosapiensGN=SRSF6PE=1SV=2	0	5288700	4256600	1	0	0	0	0	5288700	4256600	4	3	3		1	4	3	3	0	0	0	2	4	2	0	0	0	1	3	2	0	0	0	1	3	2	12.5	9.9	9.9	39.586	344	344	0	19.057	0	0	0	5.2
sp|P30050|RL12_HUMAN60SribosomalproteinL12OS=HomosapiensGN=RPL12PE=1SV=1	sp|P30050|RL12_HUMAN60SribosomalproteinL12OS=HomosapiensGN=RPL12PE=1SV=1	0	0	3887200	1	0	0	0	0	0	3887200	1	1	1		1	1	1	1	0	0	0	0	0	1	0	0	0	0	0	1	0	0	0	0	0	1	9.7	9.7	9.7	17.818	165	165	0.0058252	6.1314	0	0	0	0
sp|Q96FX7|TRM61_HUMANtRNA(adenine(58)-N(1))-methyltransferasecatalyticsubunitTRMT61AOS=HomosapiensGN=TRMT61APE=1SV=1;tr|H0Y2Q1|H0Y2Q1_HUMANtRNA(adenine(58)-N(1))-methyltransferasecatalyticsubunitTRMT61A(Fragment)OS=HomosapiensGN=TRMT61APE=1SV=1	sp|Q96FX7|TRM61_HUMANtRNA(adenine(58)-N(1))-methyltransferasecatalyticsubunitTRMT61AOS=HomosapiensGN=TRMT61APE=1SV=1;tr|H0Y2Q1|H0Y2Q1_HUMANtRNA(adenine(58)-N(1))-methyltransferasecatalyticsubunitTRMT61A(Fragment)OS=HomosapiensGN=TRMT61APE=1SV=1	0	0	3430600	1	0	0	0	0	0	3430600	2;1	2;1	2;1	;	2	2	2	2	1	0	0	0	1	1	1	0	0	0	1	1	1	0	0	0	1	1	8.3	8.3	8.3	31.381	289	289;191	0	11.756	4.8	0	0	0
tr|M0R3D6|M0R3D6_HUMAN60SribosomalproteinL18a(Fragment)OS=HomosapiensGN=RPL18APE=1SV=1;tr|M0R1A7|M0R1A7_HUMAN60SribosomalproteinL18aOS=HomosapiensGN=RPL18APE=1SV=1;tr|M0R117|M0R117_HUMAN60SribosomalproteinL18aOS=HomosapiensGN=RPL18APE=1SV=1;sp|Q02543|RL18A_HUMAN60SribosomalproteinL18aOS=HomosapiensGN=RPL18APE=1SV=2	tr|M0R3D6|M0R3D6_HUMAN60SribosomalproteinL18a(Fragment)OS=HomosapiensGN=RPL18APE=1SV=1;tr|M0R1A7|M0R1A7_HUMAN60SribosomalproteinL18aOS=HomosapiensGN=RPL18APE=1SV=1;tr|M0R117|M0R117_HUMAN60SribosomalproteinL18aOS=HomosapiensGN=RPL18APE=1SV=1;sp|Q02543|RL18A_HUMAN60SribosomalproteinL18aOS=HomosapiensGN=RPL18APE=1SV=2	0	0	3054300	1	0	0	0	0	0	3054300	2;2;2;2	2;2;2;2	2;2;2;2	;;;	4	2	2	2	0	1	0	1	1	2	0	1	0	1	1	2	0	1	0	1	1	2	13.5	13.5	13.5	16.714	141	141;147;154;176	0	12.786	0	7.1	0	7.1
tr|J3QT28|J3QT28_HUMANMitoticcheckpointproteinBUB3(Fragment)OS=HomosapiensGN=BUB3PE=1SV=1;sp|O43684|BUB3_HUMANMitoticcheckpointproteinBUB3OS=HomosapiensGN=BUB3PE=1SV=1;tr|J3QSX4|J3QSX4_HUMANMitoticcheckpointproteinBUB3OS=HomosapiensGN=BUB3PE=1SV=1	tr|J3QT28|J3QT28_HUMANMitoticcheckpointproteinBUB3(Fragment)OS=HomosapiensGN=BUB3PE=1SV=1;sp|O43684|BUB3_HUMANMitoticcheckpointproteinBUB3OS=HomosapiensGN=BUB3PE=1SV=1	0	3665000	2843300	1	0	0	0	0	3665000	2843300	5;5;1	5;5;1	5;5;1	;	3	5	5	5	0	0	1	3	3	2	0	0	1	3	3	2	0	0	1	3	3	2	20.1	20.1	20.1	31.703	278	278;328;145	0	33.291	0	0	5	12.6
sp|Q9BXY0|MAK16_HUMANProteinMAK16homologOS=HomosapiensGN=MAK16PE=1SV=2;tr|H0YBV6|H0YBV6_HUMANProteinMAK16homolog(Fragment)OS=HomosapiensGN=MAK16PE=1SV=1	sp|Q9BXY0|MAK16_HUMANProteinMAK16homologOS=HomosapiensGN=MAK16PE=1SV=2;tr|H0YBV6|H0YBV6_HUMANProteinMAK16homolog(Fragment)OS=HomosapiensGN=MAK16PE=1SV=1	0	0	2761700	1	0	0	0	0	0	2761700	2;1	2;1	2;1	;	2	2	2	2	0	0	0	0	2	2	0	0	0	0	2	2	0	0	0	0	2	2	9	9	9	35.368	300	300;137	0	13.606	0	0	0	0
tr|E9PMI6|E9PMI6_HUMANMethylosomesubunitpIClnOS=HomosapiensGN=CLNS1APE=1SV=1;tr|E9PJF4|E9PJF4_HUMANMethylosomesubunitpIClnOS=HomosapiensGN=CLNS1APE=1SV=1;tr|J3KN38|J3KN38_HUMANMethylosomesubunitpIClnOS=HomosapiensGN=CLNS1APE=1SV=1;sp|P54105|ICLN_HUMANMethylosomesubunitpIClnOS=HomosapiensGN=CLNS1APE=1SV=1	tr|E9PMI6|E9PMI6_HUMANMethylosomesubunitpIClnOS=HomosapiensGN=CLNS1APE=1SV=1;tr|E9PJF4|E9PJF4_HUMANMethylosomesubunitpIClnOS=HomosapiensGN=CLNS1APE=1SV=1;tr|J3KN38|J3KN38_HUMANMethylosomesubunitpIClnOS=HomosapiensGN=CLNS1APE=1SV=1;sp|P54105|ICLN_HUMANMethylosomesubunitpIClnOS=HomosapiensGN=CLNS1APE=1SV=1	0	0	2683800	1	0	0	0	0	0	2683800	1;1;1;1	1;1;1;1	1;1;1;1	;;;	4	1	1	1	0	1	1	1	1	1	0	1	1	1	1	1	0	1	1	1	1	1	7.8	7.8	7.8	18.259	167	167;179;203;237	0	11.26	0	7.8	7.8	7.8
tr|H3BV80|H3BV80_HUMANRNA-bindingproteinwithserine-richdomain1OS=HomosapiensGN=RNPS1PE=1SV=2;tr|H3BMS0|H3BMS0_HUMANRNA-bindingproteinwithserine-richdomain1OS=HomosapiensGN=RNPS1PE=1SV=1;tr|H3BMM9|H3BMM9_HUMANRNA-bindingproteinwithserine-richdomain1(Fragment)OS=HomosapiensGN=RNPS1PE=1SV=1;tr|H3BTC0|H3BTC0_HUMANRNA-bindingproteinwithserine-richdomain1(Fragment)OS=HomosapiensGN=RNPS1PE=1SV=1;sp|Q152…	tr|H3BV80|H3BV80_HUMANRNA-bindingproteinwithserine-richdomain1OS=HomosapiensGN=RNPS1PE=1SV=2;tr|H3BMS0|H3BMS0_HUMANRNA-bindingproteinwithserine-richdomain1OS=HomosapiensGN=RNPS1PE=1SV=1;tr|H3BMM9|H3BMM9_HUMANRNA-bindingproteinwithserine-richdomain1(Fragment)OS=HomosapiensGN=RNPS1PE=1SV=1;tr|H3BTC0|H3BTC0_HUMANRNA-bindingproteinwithserine-richdomain1(Fragment)OS=HomosapiensGN=RNPS1PE=1SV=1;sp|Q152…	0	0	2666400	1	0	0	0	0	0	2666400	2;2;2;2;2;1	2;2;2;2;2;1	2;2;2;2;2;1	;;;;;	6	2	2	2	0	0	0	1	1	2	0	0	0	1	1	2	0	0	0	1	1	2	12.8	12.8	12.8	24.561	211	211;257;284;302;305;128	0	19.963	0	0	0	7.1
tr|A0A0B4J210|A0A0B4J210_HUMANLa-relatedprotein1(Fragment)OS=HomosapiensGN=LARP1PE=1SV=2;sp|Q6PKG0|LARP1_HUMANLa-relatedprotein1OS=HomosapiensGN=LARP1PE=1SV=2	tr|A0A0B4J210|A0A0B4J210_HUMANLa-relatedprotein1(Fragment)OS=HomosapiensGN=LARP1PE=1SV=2;sp|Q6PKG0|LARP1_HUMANLa-relatedprotein1OS=HomosapiensGN=LARP1PE=1SV=2	0	0	2573600	1	0	0	0	0	0	2573600	1;1	1;1	1;1	;	2	1	1	1	0	0	0	0	0	1	0	0	0	0	0	1	0	0	0	0	0	1	3.1	3.1	3.1	90.978	816	816;1096	0	10.077	0	0	0	0
sp|Q13283|G3BP1_HUMANRasGTPase-activatingprotein-bindingprotein1OS=HomosapiensGN=G3BP1PE=1SV=1	sp|Q13283|G3BP1_HUMANRasGTPase-activatingprotein-bindingprotein1OS=HomosapiensGN=G3BP1PE=1SV=1	0	0	2511700	1	0	0	0	0	0	2511700	1	1	1		1	1	1	1	0	0	0	0	0	1	0	0	0	0	0	1	0	0	0	0	0	1	3.6	3.6	3.6	52.164	466	466	0	6.7166	0	0	0	0
sp|O95232|LC7L3_HUMANLuc7-likeprotein3OS=HomosapiensGN=LUC7L3PE=1SV=2;tr|J3KPP4|J3KPP4_HUMANCisplatinresistance-associatedoverexpressedprotein,isoformCRA_bOS=HomosapiensGN=LUC7L3PE=1SV=1;tr|D6RDI2|D6RDI2_HUMANLuc7-likeprotein3(Fragment)OS=HomosapiensGN=LUC7L3PE=1SV=1;tr|D6RHH0|D6RHH0_HUMANLuc7-likeprotein3(Fragment)OS=HomosapiensGN=LUC7L3PE=1SV=1;tr|U3KQT3|U3KQT3_HUMANLuc7-likeprotein3(Fragment)O…	sp|O95232|LC7L3_HUMANLuc7-likeprotein3OS=HomosapiensGN=LUC7L3PE=1SV=2;tr|J3KPP4|J3KPP4_HUMANCisplatinresistance-associatedoverexpressedprotein,isoformCRA_bOS=HomosapiensGN=LUC7L3PE=1SV=1;tr|D6RDI2|D6RDI2_HUMANLuc7-likeprotein3(Fragment)OS=HomosapiensGN=LUC7L3PE=1SV=1	0	0	2362400	1	0	0	0	0	0	2362400	4;4;3;1;1;1;1	4;4;3;1;1;1;1	4;4;3;1;1;1;1	;;	7	4	4	4	0	1	0	2	1	1	0	1	0	2	1	1	0	1	0	2	1	1	13.2	13.2	13.2	51.466	432	432;489;184;36;47;54;79	0	37.249	0	3.2	0	7.4
tr|E9PRI2|E9PRI2_HUMANEukaryotictranslationinitiationfactor3subunitMOS=HomosapiensGN=EIF3MPE=1SV=1;tr|E7ESM3|E7ESM3_HUMANEukaryotictranslationinitiationfactor3subunitMOS=HomosapiensGN=EIF3MPE=1SV=1;sp|Q7L2H7|EIF3M_HUMANEukaryotictranslationinitiationfactor3subunitMOS=HomosapiensGN=EIF3MPE=1SV=1	tr|E9PRI2|E9PRI2_HUMANEukaryotictranslationinitiationfactor3subunitMOS=HomosapiensGN=EIF3MPE=1SV=1;tr|E7ESM3|E7ESM3_HUMANEukaryotictranslationinitiationfactor3subunitMOS=HomosapiensGN=EIF3MPE=1SV=1;sp|Q7L2H7|EIF3M_HUMANEukaryotictranslationinitiationfactor3subunitMOS=HomosapiensGN=EIF3MPE=1SV=1	0	0	2304600	1	0	0	0	0	0	2304600	1;1;1	1;1;1	1;1;1	;;	3	1	1	1	0	1	0	0	1	1	0	1	0	0	1	1	0	1	0	0	1	1	30.5	30.5	30.5	6.382	59	59;123;374	0	7.6238	0	30.5	0	0
sp|Q7Z7K6|CENPV_HUMANCentromereproteinVOS=HomosapiensGN=CENPVPE=1SV=1	sp|Q7Z7K6|CENPV_HUMANCentromereproteinVOS=HomosapiensGN=CENPVPE=1SV=1	0	0	2218900	1	0	0	0	0	0	2218900	1	1	1		1	1	1	1	0	0	0	0	1	1	0	0	0	0	1	1	0	0	0	0	1	1	4.7	4.7	4.7	29.946	275	275	0.0020619	6.4049	0	0	0	0
REV__sp|Q6YN16|HSDL2_HUMANHydroxysteroiddehydrogenase-likeprotein2OS=HomosapiensGN=HSDL2PE=1SV=1	REV__sp|Q6YN16|HSDL2_HUMANHydroxysteroiddehydrogenase-likeprotein2OS=HomosapiensGN=HSDL2PE=1SV=1	0	0	1570500	1	0	0	0	0	0	1570500	1	1	1		1	1	1	1	0	0	0	0	0	1	0	0	0	0	0	1	0	0	0	0	0	1	0	0	0	45.394	418	418	0.0094162	6.0409	0	0	0	0
tr|E5RJW8|E5RJW8_HUMANRNA-bindingprotein12B(Fragment)OS=HomosapiensGN=RBM12BPE=1SV=1;tr|E5RHG1|E5RHG1_HUMANRNA-bindingprotein12B(Fragment)OS=HomosapiensGN=RBM12BPE=1SV=2;tr|E5RJ83|E5RJ83_HUMANRNA-bindingprotein12B(Fragment)OS=HomosapiensGN=RBM12BPE=1SV=1;tr|E5RJV8|E5RJV8_HUMANRNA-bindingprotein12B(Fragment)OS=HomosapiensGN=RBM12BPE=1SV=1;tr|B9ZVT1|B9ZVT1_HUMANRNA-bindingprotein12BOS=HomosapiensGN…	tr|E5RJW8|E5RJW8_HUMANRNA-bindingprotein12B(Fragment)OS=HomosapiensGN=RBM12BPE=1SV=1;tr|E5RHG1|E5RHG1_HUMANRNA-bindingprotein12B(Fragment)OS=HomosapiensGN=RBM12BPE=1SV=2;tr|E5RJ83|E5RJ83_HUMANRNA-bindingprotein12B(Fragment)OS=HomosapiensGN=RBM12BPE=1SV=1;tr|E5RJV8|E5RJV8_HUMANRNA-bindingprotein12B(Fragment)OS=HomosapiensGN=RBM12BPE=1SV=1;tr|B9ZVT1|B9ZVT1_HUMANRNA-bindingprotein12BOS=HomosapiensGN…	0	0	1337300	1	0	0	0	0	0	1337300	1;1;1;1;1;1	1;1;1;1;1;1	1;1;1;1;1;1	;;;;;	6	1	1	1	0	0	0	0	0	1	0	0	0	0	0	1	0	0	0	0	0	1	17.1	17.1	17.1	8.8051	82	82;122;143;149;881;1001	0.005814	6.1211	0	0	0	0
sp|Q9NUD5|ZCHC3_HUMANZincfingerCCHCdomain-containingprotein3OS=HomosapiensGN=ZCCHC3PE=1SV=1	sp|Q9NUD5|ZCHC3_HUMANZincfingerCCHCdomain-containingprotein3OS=HomosapiensGN=ZCCHC3PE=1SV=1	0	0	1176200	1	0	0	0	0	0	1176200	3	3	3		1	3	3	3	0	0	0	1	1	1	0	0	0	1	1	1	0	0	0	1	1	1	8.9	8.9	8.9	43.618	404	404	0	18.605	0	0	0	1.7
sp|P47914|RL29_HUMAN60SribosomalproteinL29OS=HomosapiensGN=RPL29PE=1SV=2	sp|P47914|RL29_HUMAN60SribosomalproteinL29OS=HomosapiensGN=RPL29PE=1SV=2	0	0	1091200	1	0	0	0	0	0	1091200	1	1	1		1	1	1	1	1	0	0	1	0	1	1	0	0	1	0	1	1	0	0	1	0	1	9.4	9.4	9.4	17.752	159	159	0	6.9836	9.4	0	0	9.4
tr|E9PRR7|E9PRR7_HUMANProteinFRG1(Fragment)OS=HomosapiensGN=FRG1PE=1SV=1;sp|Q14331|FRG1_HUMANProteinFRG1OS=HomosapiensGN=FRG1PE=1SV=1	tr|E9PRR7|E9PRR7_HUMANProteinFRG1(Fragment)OS=HomosapiensGN=FRG1PE=1SV=1;sp|Q14331|FRG1_HUMANProteinFRG1OS=HomosapiensGN=FRG1PE=1SV=1	0	0	1003800	1	0	0	0	0	0	1003800	1;1	1;1	1;1	;	2	1	1	1	0	0	0	0	1	1	0	0	0	0	1	1	0	0	0	0	1	1	11.2	11.2	11.2	12.516	116	116;258	0	7.0808	0	0	0	0
sp|P05388|RLA0_HUMAN60SacidicribosomalproteinP0OS=HomosapiensGN=RPLP0PE=1SV=1;tr|F8VWS0|F8VWS0_HUMAN60SacidicribosomalproteinP0OS=HomosapiensGN=RPLP0PE=1SV=1;tr|F8VU65|F8VU65_HUMAN60SacidicribosomalproteinP0(Fragment)OS=HomosapiensGN=RPLP0PE=1SV=1;tr|F8VPE8|F8VPE8_HUMAN60SacidicribosomalproteinP0(Fragment)OS=HomosapiensGN=RPLP0PE=1SV=1;tr|G3V210|G3V210_HUMAN60SacidicribosomalproteinP0OS=Homosapie…	sp|P05388|RLA0_HUMAN60SacidicribosomalproteinP0OS=HomosapiensGN=RPLP0PE=1SV=1;tr|F8VWS0|F8VWS0_HUMAN60SacidicribosomalproteinP0OS=HomosapiensGN=RPLP0PE=1SV=1;tr|F8VU65|F8VU65_HUMAN60SacidicribosomalproteinP0(Fragment)OS=HomosapiensGN=RPLP0PE=1SV=1;tr|F8VPE8|F8VPE8_HUMAN60SacidicribosomalproteinP0(Fragment)OS=HomosapiensGN=RPLP0PE=1SV=1;tr|G3V210|G3V210_HUMAN60SacidicribosomalproteinP0OS=Homosapie…	200.121	173.523	169.643	1.60313e+07	48094000	0	0	3208200000	2781800000	2719600000	15;14;11;10;10;10;10;10;9;9;9;8;4	15;14;11;10;10;10;10;10;9;9;9;8;4	15;14;11;10;10;10;10;10;9;9;9;8;4	;;;;;;;;;;;	13	15	15	15	5	1	1	15	9	8	5	1	1	15	9	8	5	1	1	15	9	8	49.2	49.2	49.2	34.273	317	317;281;247;153;166;244;246;317;121;142;156;111;107	0	323.31	21.8	9.8	3.2	49.2
sp|P06748|NPM_HUMANNucleophosminOS=HomosapiensGN=NPM1PE=1SV=2;tr|E5RGW4|E5RGW4_HUMANNucleophosmin(Fragment)OS=HomosapiensGN=NPM1PE=1SV=1;tr|E5RI98|E5RI98_HUMANNucleophosmin(Fragment)OS=HomosapiensGN=NPM1PE=1SV=1	sp|P06748|NPM_HUMANNucleophosminOS=HomosapiensGN=NPM1PE=1SV=2	6.78333	15.8826	48.133	1.10668e+07	8933700	9648800	14618000	75070000	175770000	532680000	8;2;2	8;2;2	8;2;2		3	8	8	8	3	2	2	6	6	7	3	2	2	6	6	7	3	2	2	6	6	7	31.3	31.3	31.3	32.575	294	294;59;111	0	323.31	16.7	9.5	9.5	28.9
sp|P23396|RS3_HUMAN40SribosomalproteinS3OS=HomosapiensGN=RPS3PE=1SV=2;tr|E9PPU1|E9PPU1_HUMAN40SribosomalproteinS3OS=HomosapiensGN=RPS3PE=1SV=1;tr|E9PL09|E9PL09_HUMAN40SribosomalproteinS3OS=HomosapiensGN=RPS3PE=1SV=1;tr|F2Z2S8|F2Z2S8_HUMAN40SribosomalproteinS3OS=HomosapiensGN=RPS3PE=1SV=1;tr|H0YCJ7|H0YCJ7_HUMAN40SribosomalproteinS3(Fragment)OS=HomosapiensGN=RPS3PE=1SV=1;tr|H0YEU2|H0YEU2_HUMAN40Sri…	sp|P23396|RS3_HUMAN40SribosomalproteinS3OS=HomosapiensGN=RPS3PE=1SV=2;tr|E9PPU1|E9PPU1_HUMAN40SribosomalproteinS3OS=HomosapiensGN=RPS3PE=1SV=1;tr|E9PL09|E9PL09_HUMAN40SribosomalproteinS3OS=HomosapiensGN=RPS3PE=1SV=1;tr|F2Z2S8|F2Z2S8_HUMAN40SribosomalproteinS3OS=HomosapiensGN=RPS3PE=1SV=1;tr|H0YCJ7|H0YCJ7_HUMAN40SribosomalproteinS3(Fragment)OS=HomosapiensGN=RPS3PE=1SV=1;tr|H0YEU2|H0YEU2_HUMAN40Sri…	0	63.3292	32.1656	7.37527e+06	20103000	0	2022800	0	467070000	237230000	12;10;10;8;8;7;6;6;6;6;3;3;1	12;10;10;8;8;7;6;6;6;6;3;3;1	12;10;10;8;8;7;6;6;6;6;3;3;1	;;;;;;;;;	13	12	12	12	3	1	2	1	10	10	3	1	2	1	10	10	3	1	2	1	10	10	47.7	47.7	47.7	26.688	243	243;158;231;117;135;171;91;115;123;128;44;103;33	0	88.108	12.8	3.7	9.1	5.3
sp|Q96DI7|SNR40_HUMANU5smallnuclearribonucleoprotein40kDaproteinOS=HomosapiensGN=SNRNP40PE=1SV=1;tr|Q9NSS8|Q9NSS8_HUMANPutativeuncharacterizedproteinDKFZp434D199OS=HomosapiensGN=DKFZp434D199PE=1SV=1	sp|Q96DI7|SNR40_HUMANU5smallnuclearribonucleoprotein40kDaproteinOS=HomosapiensGN=SNRNP40PE=1SV=1;tr|Q9NSS8|Q9NSS8_HUMANPutativeuncharacterizedproteinDKFZp434D199OS=HomosapiensGN=DKFZp434D199PE=1SV=1	66.4527	46.1699	24.3732	709467	0	2128400	0	47146000	32756000	17292000	9;5	9;5	9;5	;	2	9	9	9	0	3	1	9	4	3	0	3	1	9	4	3	0	3	1	9	4	3	35.6	35.6	35.6	39.31	357	357;127	0	128.46	0	10.4	4.2	35.6
sp|P07355|ANXA2_HUMANAnnexinA2OS=HomosapiensGN=ANXA2PE=1SV=2;tr|H0YN42|H0YN42_HUMANAnnexin(Fragment)OS=HomosapiensGN=ANXA2PE=1SV=1;tr|H0YMD0|H0YMD0_HUMANAnnexin(Fragment)OS=HomosapiensGN=ANXA2PE=1SV=1;tr|H0YMU9|H0YMU9_HUMANAnnexinOS=HomosapiensGN=ANXA2PE=1SV=1;tr|H0YKS4|H0YKS4_HUMANAnnexin(Fragment)OS=HomosapiensGN=ANXA2PE=1SV=1;sp|A6NMY6|AXA2L_HUMANPutativeannexinA2-likeproteinOS=HomosapiensGN=A…	sp|P07355|ANXA2_HUMANAnnexinA2OS=HomosapiensGN=ANXA2PE=1SV=2;tr|H0YN42|H0YN42_HUMANAnnexin(Fragment)OS=HomosapiensGN=ANXA2PE=1SV=1;tr|H0YMD0|H0YMD0_HUMANAnnexin(Fragment)OS=HomosapiensGN=ANXA2PE=1SV=1;tr|H0YMU9|H0YMU9_HUMANAnnexinOS=HomosapiensGN=ANXA2PE=1SV=1;tr|H0YKS4|H0YKS4_HUMANAnnexin(Fragment)OS=HomosapiensGN=ANXA2PE=1SV=1;sp|A6NMY6|AXA2L_HUMANPutativeannexinA2-likeproteinOS=HomosapiensGN=A…	36.168	23.5491	22.5032	1703800	0	5111400	0	61623000	40123000	38341000	12;11;10;10;8;8;7;6;6;6;5;5;5;5;5;5;5;5;5;4;3;3;3;1	12;11;10;10;8;8;7;6;6;6;5;5;5;5;5;5;5;5;5;4;3;3;3;1	12;11;10;10;8;8;7;6;6;6;5;5;5;5;5;5;5;5;5;4;3;3;3;1	;;;;;;;;;	24	12	12	12	0	5	1	10	8	6	0	5	1	10	8	6	0	5	1	10	8	6	37.8	37.8	37.8	38.604	339	339;256;227;230;176;339;248;139;142;149;79;81;110;119;132;133;134;146;175;65;47;59;69;45	0	197.75	0	20.4	5.3	33.3
sp|P62995|TRA2B_HUMANTransformer-2proteinhomologbetaOS=HomosapiensGN=TRA2BPE=1SV=1;tr|H7BXF3|H7BXF3_HUMANTransformer-2proteinhomologbeta(Fragment)OS=HomosapiensGN=TRA2BPE=1SV=1;tr|H7C2L4|H7C2L4_HUMANTransformer-2proteinhomologbeta(Fragment)OS=HomosapiensGN=TRA2BPE=1SV=1	sp|P62995|TRA2B_HUMANTransformer-2proteinhomologbetaOS=HomosapiensGN=TRA2BPE=1SV=1;tr|H7BXF3|H7BXF3_HUMANTransformer-2proteinhomologbeta(Fragment)OS=HomosapiensGN=TRA2BPE=1SV=1;tr|H7C2L4|H7C2L4_HUMANTransformer-2proteinhomologbeta(Fragment)OS=HomosapiensGN=TRA2BPE=1SV=1	13.2419	24.6693	21.8527	3.04163e+06	9124900	0	0	40277000	75035000	66468000	8;6;5	8;6;5	7;5;5	;;	3	8	8	7	2	0	0	5	5	5	2	0	0	5	5	5	2	0	0	4	5	5	28.1	28.1	25	33.665	288	288;127;107	0	98.81	10.4	0	0	20.5
tr|B4DY09|B4DY09_HUMANInterleukinenhancer-bindingfactor2OS=HomosapiensGN=ILF2PE=1SV=1;sp|Q12905|ILF2_HUMANInterleukinenhancer-bindingfactor2OS=HomosapiensGN=ILF2PE=1SV=2;tr|X6R6Z1|X6R6Z1_HUMANInterleukinenhancer-bindingfactor2(Fragment)OS=HomosapiensGN=ILF2PE=1SV=1;tr|A0A0A0MRL0|A0A0A0MRL0_HUMANInterleukinenhancer-bindingfactor2OS=HomosapiensGN=ILF2PE=1SV=1	tr|B4DY09|B4DY09_HUMANInterleukinenhancer-bindingfactor2OS=HomosapiensGN=ILF2PE=1SV=1;sp|Q12905|ILF2_HUMANInterleukinenhancer-bindingfactor2OS=HomosapiensGN=ILF2PE=1SV=2;tr|X6R6Z1|X6R6Z1_HUMANInterleukinenhancer-bindingfactor2(Fragment)OS=HomosapiensGN=ILF2PE=1SV=1	0	21.9481	20.518	391500	0	1174500	0	0	8592700	8032800	3;3;2;1	3;3;2;1	3;3;2;1	;;	4	3	3	3	0	2	1	0	2	3	0	2	1	0	2	3	0	2	1	0	2	3	12.5	12.5	12.5	38.91	352	352;390;115;150	0	22.329	0	6.8	2.8	0
sp|Q13595|TRA2A_HUMANTransformer-2proteinhomologalphaOS=HomosapiensGN=TRA2APE=1SV=1	sp|Q13595|TRA2A_HUMANTransformer-2proteinhomologalphaOS=HomosapiensGN=TRA2APE=1SV=1	18.4577	24.6942	20.1215	2.16197e+06	6485900	0	0	39905000	53388000	43502000	5	4	4		1	5	4	4	2	0	1	3	3	4	2	0	1	2	3	4	2	0	1	2	3	4	18.4	15.2	15.2	32.688	282	282	0	46.007	8.2	0	5	11.3
sp|Q15717|ELAV1_HUMANELAV-likeprotein1OS=HomosapiensGN=ELAVL1PE=1SV=2;tr|M0QZR9|M0QZR9_HUMANELAV-likeprotein1OS=HomosapiensGN=ELAVL1PE=1SV=1;tr|M0R055|M0R055_HUMANELAV-likeprotein1(Fragment)OS=HomosapiensGN=ELAVL1PE=1SV=1	sp|Q15717|ELAV1_HUMANELAV-likeprotein1OS=HomosapiensGN=ELAVL1PE=1SV=2;tr|M0QZR9|M0QZR9_HUMANELAV-likeprotein1OS=HomosapiensGN=ELAVL1PE=1SV=1	10.5977	8.70177	8.84956	3.70787e+06	7198400	0	3925200	39295000	32265000	32813000	10;5;2	10;5;2	10;5;2	;	3	10	10	10	2	1	2	8	5	5	2	1	2	8	5	5	2	1	2	8	5	5	36.5	36.5	36.5	36.091	326	326;153;133	0	185	7.4	3.4	7.7	27.9
tr|B2R5W2|B2R5W2_HUMANHeterogeneousnuclearribonucleoproteinsC1/C2OS=HomosapiensGN=HNRNPCPE=1SV=1;tr|G3V4C1|G3V4C1_HUMANHeterogeneousnuclearribonucleoproteinsC1/C2OS=HomosapiensGN=HNRNPCPE=1SV=1;tr|G3V4W0|G3V4W0_HUMANHeterogeneousnuclearribonucleoproteinsC1/C2(Fragment)OS=HomosapiensGN=HNRNPCPE=1SV=1;tr|B4DY08|B4DY08_HUMANHeterogeneousnuclearribonucleoproteinsC1/C2OS=HomosapiensGN=HNRNPCPE=1SV=1;t…	tr|B2R5W2|B2R5W2_HUMANHeterogeneousnuclearribonucleoproteinsC1/C2OS=HomosapiensGN=HNRNPCPE=1SV=1;tr|G3V4C1|G3V4C1_HUMANHeterogeneousnuclearribonucleoproteinsC1/C2OS=HomosapiensGN=HNRNPCPE=1SV=1;tr|G3V4W0|G3V4W0_HUMANHeterogeneousnuclearribonucleoproteinsC1/C2(Fragment)OS=HomosapiensGN=HNRNPCPE=1SV=1;tr|B4DY08|B4DY08_HUMANHeterogeneousnuclearribonucleoproteinsC1/C2OS=HomosapiensGN=HNRNPCPE=1SV=1;t…	9.28535	12.0595	8.44741	1.17335e+08	208360000	68553000	75093000	1089500000	1415000000	991180000	15;15;14;14;14;14;13;9;9;8;8;8;8;8;8;7;7;5;4	15;15;14;14;14;14;13;9;9;8;8;8;8;8;8;7;7;5;4	7;7;6;6;6;6;5;4;4;3;3;3;5;0;0;2;4;1;0	;;;;;;;;;;;;;;	19	15	15	7	10	5	6	13	10	11	10	5	6	13	10	11	4	3	3	6	4	4	46.6	46.6	29.3	31.948	290	290;292;262;288;305;306;231;175;187;117;121;126;214;293;293;147;180;66;54	0	243.52	27.9	16.2	19.7	41
sp|P08621|RU17_HUMANU1smallnuclearribonucleoprotein70kDaOS=HomosapiensGN=SNRNP70PE=1SV=2;tr|M0QYR1|M0QYR1_HUMANU1smallnuclearribonucleoprotein70kDa(Fragment)OS=HomosapiensGN=SNRNP70PE=1SV=1	sp|P08621|RU17_HUMANU1smallnuclearribonucleoprotein70kDaOS=HomosapiensGN=SNRNP70PE=1SV=2;tr|M0QYR1|M0QYR1_HUMANU1smallnuclearribonucleoprotein70kDa(Fragment)OS=HomosapiensGN=SNRNP70PE=1SV=1	0	8.64364	7.90554	922100	0	2766300	0	0	7970300	7289700	7;4	7;4	7;4	;	2	7	7	7	0	3	4	1	2	3	0	3	4	1	2	3	0	3	4	1	2	3	18.1	18.1	18.1	51.556	437	437;94	0	42.473	0	9.2	11.4	2.5
sp|P62424|RL7A_HUMAN60SribosomalproteinL7aOS=HomosapiensGN=RPL7APE=1SV=2;tr|Q5T8U3|Q5T8U3_HUMAN60SribosomalproteinL7a(Fragment)OS=HomosapiensGN=RPL7APE=1SV=1;tr|Q5T8U2|Q5T8U2_HUMAN60SribosomalproteinL7aOS=HomosapiensGN=RPL7APE=1SV=1	sp|P62424|RL7A_HUMAN60SribosomalproteinL7aOS=HomosapiensGN=RPL7APE=1SV=2;tr|Q5T8U3|Q5T8U3_HUMAN60SribosomalproteinL7a(Fragment)OS=HomosapiensGN=RPL7APE=1SV=1	0.372367	6.55016	6.83085	2.10193e+08	630580000	0	0	78269000	1376800000	1435800000	13;10;5	13;10;5	13;10;5	;	3	13	13	13	10	0	0	8	10	9	10	0	0	8	10	9	10	0	0	8	10	9	33.8	33.8	33.8	29.995	266	266;191;151	0	188.75	28.9	0	0	25.9
tr|A0A0B4J1Z1|A0A0B4J1Z1_HUMANSerine/arginine-rich-splicingfactor7OS=HomosapiensGN=SRSF7PE=1SV=1;tr|C9JAB2|C9JAB2_HUMANSerine/arginine-rich-splicingfactor7OS=HomosapiensGN=SRSF7PE=1SV=1;sp|Q16629|SRSF7_HUMANSerine/arginine-richsplicingfactor7OS=HomosapiensGN=SRSF7PE=1SV=1;tr|F8WEA1|F8WEA1_HUMANSerine/arginine-rich-splicingfactor7OS=HomosapiensGN=SRSF7PE=1SV=1;tr|A0A087X2D0|A0A087X2D0_HUMANSerine/…	tr|A0A0B4J1Z1|A0A0B4J1Z1_HUMANSerine/arginine-rich-splicingfactor7OS=HomosapiensGN=SRSF7PE=1SV=1;tr|C9JAB2|C9JAB2_HUMANSerine/arginine-rich-splicingfactor7OS=HomosapiensGN=SRSF7PE=1SV=1;sp|Q16629|SRSF7_HUMANSerine/arginine-richsplicingfactor7OS=HomosapiensGN=SRSF7PE=1SV=1	0	6.60427	6.66139	12938000	38814000	0	0	0	85446000	86185000	6;6;6;1;1;1	6;6;6;1;1;1	6;6;6;1;1;1	;;	6	6	6	6	2	0	0	1	5	6	2	0	0	1	5	6	2	0	0	1	5	6	44.5	44.5	44.5	15.763	137	137;235;238;51;95;164	0	49.113	15.3	0	0	6.6
sp|P62753|RS6_HUMAN40SribosomalproteinS6OS=HomosapiensGN=RPS6PE=1SV=1;tr|A2A3R7|A2A3R7_HUMAN40SribosomalproteinS6OS=HomosapiensGN=RPS6PE=1SV=1;tr|A2A3R5|A2A3R5_HUMAN40SribosomalproteinS6OS=HomosapiensGN=RPS6PE=1SV=1	sp|P62753|RS6_HUMAN40SribosomalproteinS6OS=HomosapiensGN=RPS6PE=1SV=1;tr|A2A3R7|A2A3R7_HUMAN40SribosomalproteinS6OS=HomosapiensGN=RPS6PE=1SV=1;tr|A2A3R5|A2A3R5_HUMAN40SribosomalproteinS6OS=HomosapiensGN=RPS6PE=1SV=1	0.31912	2.82379	5.50802	1.80697e+07	54209000	0	0	5766400	51025000	99528000	3;2;2	3;2;2	3;2;2	;;	3	3	3	3	2	0	0	2	2	3	2	0	0	2	2	3	2	0	0	2	2	3	14.1	14.1	14.1	28.68	249	249;91;218	0	36.002	8	0	0	8
sp|P52907|CAZA1_HUMANF-actin-cappingproteinsubunitalpha-1OS=HomosapiensGN=CAPZA1PE=1SV=3	sp|P52907|CAZA1_HUMANF-actin-cappingproteinsubunitalpha-1OS=HomosapiensGN=CAPZA1PE=1SV=3	14.8339	3.6622	5.0295	1.03277e+07	0	15662000	15321000	153200000	37822000	51943000	9	9	7		1	9	9	7	0	4	3	9	3	3	0	4	3	9	3	3	0	3	2	7	2	2	54.5	54.5	45.1	32.922	286	286	0	323.31	0	20.6	15	54.5
sp|P18124|RL7_HUMAN60SribosomalproteinL7OS=HomosapiensGN=RPL7PE=1SV=1;tr|A8MUD9|A8MUD9_HUMAN60SribosomalproteinL7OS=HomosapiensGN=RPL7PE=1SV=1;tr|C9JIJ5|C9JIJ5_HUMAN60SribosomalproteinL7(Fragment)OS=HomosapiensGN=RPL7PE=1SV=1;tr|C9JZ88|C9JZ88_HUMAN60SribosomalproteinL7(Fragment)OS=HomosapiensGN=RPL7PE=1SV=1	sp|P18124|RL7_HUMAN60SribosomalproteinL7OS=HomosapiensGN=RPL7PE=1SV=1;tr|A8MUD9|A8MUD9_HUMAN60SribosomalproteinL7OS=HomosapiensGN=RPL7PE=1SV=1	0.139288	6.08686	4.88432	2.79077e+08	837230000	0	0	38872000	1698700000	1363100000	14;11;4;3	14;11;4;3	14;11;4;3	;	4	14	14	14	12	1	1	6	10	10	12	1	1	6	10	10	12	1	1	6	10	10	44	44	44	29.225	248	248;208;99;88	0	155.99	40.7	4.4	4.4	27
sp|O95983|MBD3_HUMANMethyl-CpG-bindingdomainprotein3OS=HomosapiensGN=MBD3PE=1SV=1;tr|K7EIE8|K7EIE8_HUMANMethyl-CpGbindingdomainprotein3,isoformCRA_bOS=HomosapiensGN=MBD3PE=1SV=1;tr|A0A087WT34|A0A087WT34_HUMANMethyl-CpG-bindingdomainprotein3(Fragment)OS=HomosapiensGN=MBD3PE=1SV=1;tr|A0A087X1H1|A0A087X1H1_HUMANMethyl-CpG-bindingdomainprotein3(Fragment)OS=HomosapiensGN=MBD3PE=1SV=1;tr|A0A0A0MTS6|A0A…	sp|O95983|MBD3_HUMANMethyl-CpG-bindingdomainprotein3OS=HomosapiensGN=MBD3PE=1SV=1;tr|K7EIE8|K7EIE8_HUMANMethyl-CpGbindingdomainprotein3,isoformCRA_bOS=HomosapiensGN=MBD3PE=1SV=1	2.51004	2.71762	4.72257	6349300	17121000	1926900	0	15937000	17255000	29985000	6;4;2;2;2	6;4;2;2;2	6;4;2;2;2	;	5	6	6	6	3	2	0	6	3	3	3	2	0	6	3	3	3	2	0	6	3	3	24.4	24.4	24.4	32.844	291	291;235;130;147;185	0	127.37	12	10	0	24.4
sp|P62136|PP1A_HUMANSerine/threonine-proteinphosphatasePP1-alphacatalyticsubunitOS=HomosapiensGN=PPP1CAPE=1SV=1;tr|E9PMD7|E9PMD7_HUMANSerine/threonine-proteinphosphatase(Fragment)OS=HomosapiensGN=PPP1CAPE=1SV=1;tr|F5H1L6|F5H1L6_HUMANSerine/threonine-proteinphosphatasePP1-alphacatalyticsubunit(Fragment)OS=HomosapiensGN=PPP1CAPE=1SV=1;tr|F5H037|F5H037_HUMANSerine/threonine-proteinphosphatasePP1-alp…	sp|P62136|PP1A_HUMANSerine/threonine-proteinphosphatasePP1-alphacatalyticsubunitOS=HomosapiensGN=PPP1CAPE=1SV=1;tr|E9PMD7|E9PMD7_HUMANSerine/threonine-proteinphosphatase(Fragment)OS=HomosapiensGN=PPP1CAPE=1SV=1	17.4932	5.78465	4.69579	4704000	14112000	0	0	82288000	27211000	22089000	9;8;2;2	9;8;2;2	5;4;1;1	;	4	9	9	5	3	1	1	9	3	3	3	1	1	9	3	3	1	1	1	5	1	1	25.5	25.5	12.7	37.512	330	330;253;169;180	0	132.32	10.3	3.3	3.3	25.5
sp|P50402|EMD_HUMANEmerinOS=HomosapiensGN=EMDPE=1SV=1;tr|Q5HY57|Q5HY57_HUMANEmerinOS=HomosapiensGN=EMDPE=1SV=1;tr|F8WEQ1|F8WEQ1_HUMANEmerinOS=HomosapiensGN=EMDPE=1SV=1	sp|P50402|EMD_HUMANEmerinOS=HomosapiensGN=EMDPE=1SV=1;tr|Q5HY57|Q5HY57_HUMANEmerinOS=HomosapiensGN=EMDPE=1SV=1	10.3966	6.29472	4.43142	5.05503e+06	12755000	2410100	0	52555000	31820000	22401000	9;5;1	9;5;1	9;5;1	;	3	9	9	9	5	2	1	8	3	3	5	2	1	8	3	3	5	2	1	8	3	3	44.1	44.1	44.1	28.994	254	254;219;21	0	176.46	30.3	13.4	6.7	43.7
sp|P31942|HNRH3_HUMANHeterogeneousnuclearribonucleoproteinH3OS=HomosapiensGN=HNRNPH3PE=1SV=2	sp|P31942|HNRH3_HUMANHeterogeneousnuclearribonucleoproteinH3OS=HomosapiensGN=HNRNPH3PE=1SV=2	4.38751	4.60489	3.7553	8285100	0	16049000	8806300	36351000	38152000	31113000	5	5	5		1	5	5	5	0	2	3	3	2	3	0	2	3	3	2	3	0	2	3	3	2	3	19.9	19.9	19.9	36.926	346	346	0	122.28	0	7.8	11.3	14.5
sp|Q9UKD2|MRT4_HUMANmRNAturnoverprotein4homologOS=HomosapiensGN=MRTO4PE=1SV=2	sp|Q9UKD2|MRT4_HUMANmRNAturnoverprotein4homologOS=HomosapiensGN=MRTO4PE=1SV=2	0	6.30413	3.69576	5.86267e+06	17588000	0	0	0	36959000	21667000	9	9	9		1	9	9	9	3	0	0	0	7	4	3	0	0	0	7	4	3	0	0	0	7	4	35.1	35.1	35.1	27.56	239	239	0	54.11	12.6	0	0	0
sp|P46777|RL5_HUMAN60SribosomalproteinL5OS=HomosapiensGN=RPL5PE=1SV=3;tr|Q5T7N0|Q5T7N0_HUMAN60SribosomalproteinL5(Fragment)OS=HomosapiensGN=RPL5PE=1SV=2;tr|R4GNJ2|R4GNJ2_HUMAN60SribosomalproteinL5OS=HomosapiensGN=RPL5PE=1SV=1	sp|P46777|RL5_HUMAN60SribosomalproteinL5OS=HomosapiensGN=RPL5PE=1SV=3	10.9812	1.95854	3.67142	5.32437e+07	12685000	50541000	96505000	584680000	104280000	195480000	13;3;1	13;3;1	13;3;1		3	13	13	13	1	5	2	10	7	8	1	5	2	10	7	8	1	5	2	10	7	8	40.1	40.1	40.1	34.362	297	297;130;63	0	266.8	4.7	17.8	7.1	28.3
sp|P15880|RS2_HUMAN40SribosomalproteinS2OS=HomosapiensGN=RPS2PE=1SV=2;tr|H0YEN5|H0YEN5_HUMAN40SribosomalproteinS2(Fragment)OS=HomosapiensGN=RPS2PE=1SV=1;tr|E9PQD7|E9PQD7_HUMAN40SribosomalproteinS2OS=HomosapiensGN=RPS2PE=1SV=1;tr|E9PMM9|E9PMM9_HUMAN40SribosomalproteinS2(Fragment)OS=HomosapiensGN=RPS2PE=1SV=1;tr|E9PPT0|E9PPT0_HUMAN40SribosomalproteinS2OS=HomosapiensGN=RPS2PE=1SV=1;tr|I3L404|I3L404_…	sp|P15880|RS2_HUMAN40SribosomalproteinS2OS=HomosapiensGN=RPS2PE=1SV=2;tr|H0YEN5|H0YEN5_HUMAN40SribosomalproteinS2(Fragment)OS=HomosapiensGN=RPS2PE=1SV=1;tr|E9PQD7|E9PQD7_HUMAN40SribosomalproteinS2OS=HomosapiensGN=RPS2PE=1SV=1;tr|E9PMM9|E9PMM9_HUMAN40SribosomalproteinS2(Fragment)OS=HomosapiensGN=RPS2PE=1SV=1;tr|E9PPT0|E9PPT0_HUMAN40SribosomalproteinS2OS=HomosapiensGN=RPS2PE=1SV=1	0	3.31641	3.46728	4.08967e+07	122690000	0	0	0	135630000	141800000	6;5;5;4;3;2;2;1;1	6;5;5;4;3;2;2;1;1	6;5;5;4;3;2;2;1;1	;;;;	9	6	6	6	5	0	0	0	5	5	5	0	0	0	5	5	5	0	0	0	5	5	22.2	22.2	22.2	31.324	293	293;195;235;218;197;155;209;44;63	0	261.93	18.4	0	0	0
tr|Q5JRI1|Q5JRI1_HUMANSerine/arginine-rich-splicingfactor10OS=HomosapiensGN=SRSF10PE=1SV=1;sp|O75494|SRS10_HUMANSerine/arginine-richsplicingfactor10OS=HomosapiensGN=SRSF10PE=1SV=1;tr|Q6IQ42|Q6IQ42_HUMANFUSIP1proteinOS=HomosapiensGN=FUSIP1PE=1SV=1;tr|R4GMP8|R4GMP8_HUMANSerine/arginine-rich-splicingfactor10OS=HomosapiensGN=SRSF10PE=1SV=1	tr|Q5JRI1|Q5JRI1_HUMANSerine/arginine-rich-splicingfactor10OS=HomosapiensGN=SRSF10PE=1SV=1;sp|O75494|SRS10_HUMANSerine/arginine-richsplicingfactor10OS=HomosapiensGN=SRSF10PE=1SV=1	3.99036	5.61386	3.44235	5.01633e+06	15049000	0	0	20017000	28161000	17268000	6;6;2;1	6;6;2;1	3;3;2;1	;	4	6	6	3	2	0	0	5	3	4	2	0	0	5	3	4	1	0	0	2	1	1	36	36	22.7	20.913	172	172;262;69;40	0	142.42	13.4	0	0	26.7
tr|A0A087WTT1|A0A087WTT1_HUMANPolyadenylate-bindingproteinOS=HomosapiensGN=PABPC1PE=1SV=1;sp|P11940|PABP1_HUMANPolyadenylate-bindingprotein1OS=HomosapiensGN=PABPC1PE=1SV=2;tr|E7EQV3|E7EQV3_HUMANPolyadenylate-bindingproteinOS=HomosapiensGN=PABPC1PE=1SV=1;tr|E7ERJ7|E7ERJ7_HUMANPolyadenylate-bindingproteinOS=HomosapiensGN=PABPC1PE=1SV=1;tr|H0YAR2|H0YAR2_HUMANPolyadenylate-bindingprotein1(Fragment)OS…	tr|A0A087WTT1|A0A087WTT1_HUMANPolyadenylate-bindingproteinOS=HomosapiensGN=PABPC1PE=1SV=1;sp|P11940|PABP1_HUMANPolyadenylate-bindingprotein1OS=HomosapiensGN=PABPC1PE=1SV=2;tr|E7EQV3|E7EQV3_HUMANPolyadenylate-bindingproteinOS=HomosapiensGN=PABPC1PE=1SV=1;tr|E7ERJ7|E7ERJ7_HUMANPolyadenylate-bindingproteinOS=HomosapiensGN=PABPC1PE=1SV=1;tr|H0YAR2|H0YAR2_HUMANPolyadenylate-bindingprotein1(Fragment)OS…	4.00478	3.4848	2.72073	5444500	0	8012900	8320600	21804000	18973000	14813000	12;12;11;11;7;6;4;4;4;3;3;3;2;2;2;1;1;1;1;1;1;1;1;1	12;12;11;11;7;6;4;4;4;3;3;3;2;2;2;1;1;1;1;1;1;1;1;1	7;7;6;6;5;2;2;2;2;3;3;3;1;0;2;1;1;0;0;0;0;0;1;1	;;;;;	24	12	12	7	0	5	5	8	5	4	0	5	5	8	5	4	0	1	3	5	3	2	27	27	15.1	58.535	522	522;636;591;604;284;175;108;118;129;131;614;631;75;129;165;43;61;68;136;169;183;195;200;382	0	207.29	0	10	12.5	18
sp|P29372|3MG_HUMANDNA-3-methyladenineglycosylaseOS=HomosapiensGN=MPGPE=1SV=3;tr|A2IDA3|A2IDA3_HUMANDNA-3-methyladenineglycosylase(Fragment)OS=HomosapiensGN=MPGPE=1SV=1	sp|P29372|3MG_HUMANDNA-3-methyladenineglycosylaseOS=HomosapiensGN=MPGPE=1SV=3;tr|A2IDA3|A2IDA3_HUMANDNA-3-methyladenineglycosylase(Fragment)OS=HomosapiensGN=MPGPE=1SV=1	6.30736	2.62766	2.38292	3.01013e+06	9030400	0	0	18986000	7909600	7172900	6;5	6;5	6;5	;	2	6	6	6	2	0	0	5	5	2	2	0	0	5	5	2	2	0	0	5	5	2	26.5	26.5	26.5	32.868	298	298;251	0	75.192	8.1	0	0	22.5
tr|G3V203|G3V203_HUMAN60SribosomalproteinL18OS=HomosapiensGN=RPL18PE=1SV=1;tr|H0YHA7|H0YHA7_HUMAN60SribosomalproteinL18(Fragment)OS=HomosapiensGN=RPL18PE=1SV=1;sp|Q07020|RL18_HUMAN60SribosomalproteinL18OS=HomosapiensGN=RPL18PE=1SV=2;tr|J3QQ67|J3QQ67_HUMAN60SribosomalproteinL18(Fragment)OS=HomosapiensGN=RPL18PE=1SV=1;tr|F8VUA6|F8VUA6_HUMAN60SribosomalproteinL18(Fragment)OS=HomosapiensGN=RPL18PE=1S…	tr|G3V203|G3V203_HUMAN60SribosomalproteinL18OS=HomosapiensGN=RPL18PE=1SV=1;tr|H0YHA7|H0YHA7_HUMAN60SribosomalproteinL18(Fragment)OS=HomosapiensGN=RPL18PE=1SV=1;sp|Q07020|RL18_HUMAN60SribosomalproteinL18OS=HomosapiensGN=RPL18PE=1SV=2;tr|J3QQ67|J3QQ67_HUMAN60SribosomalproteinL18(Fragment)OS=HomosapiensGN=RPL18PE=1SV=1;tr|F8VUA6|F8VUA6_HUMAN60SribosomalproteinL18(Fragment)OS=HomosapiensGN=RPL18PE=1S…	14.3049	4.97512	2.33666	5.03667e+06	15110000	0	0	72049000	25058000	11769000	4;4;4;4;3;3;3	4;4;4;4;3;3;3	4;4;4;4;3;3;3	;;;;;;	7	4	4	4	3	1	0	3	3	4	3	1	0	3	3	4	3	1	0	3	3	4	28.7	28.7	28.7	18.756	164	164;167;188;190;130;133;138	0	46.191	20.7	6.1	0	20.7
sp|O75940|SPF30_HUMANSurvivalofmotorneuron-related-splicingfactor30OS=HomosapiensGN=SMNDC1PE=1SV=1	sp|O75940|SPF30_HUMANSurvivalofmotorneuron-related-splicingfactor30OS=HomosapiensGN=SMNDC1PE=1SV=1	0	1.35605	2.32561	6259000	18777000	0	0	0	8487500	14556000	4	4	4		1	4	4	4	4	0	0	0	2	3	4	0	0	0	2	3	4	0	0	0	2	3	29.4	29.4	29.4	26.711	238	238	0	27.642	29.4	0	0	0
CON__P00761;tr|A6XGL3|A6XGL3_HUMANProteaseserine1OS=HomosapiensGN=PRSS1PE=1SV=1;tr|A0A087WWD8|A0A087WWD8_HUMANTransmembraneproteaseserine13OS=HomosapiensGN=TMPRSS13PE=3SV=1;tr|E9PRA0|E9PRA0_HUMANTransmembraneproteaseserine13OS=HomosapiensGN=TMPRSS13PE=3SV=1;tr|J3KQC6|J3KQC6_HUMANTransmembraneproteaseserine13OS=HomosapiensGN=TMPRSS13PE=3SV=1;sp|Q9BYE2|TMPSD_HUMANTransmembraneproteaseserine13OS=Hom…	CON__P00761	1.4032	1.37539	2.21715	1.37736e+10	26482000000	4506700000	10332000000	19327000000	18944000000	30538000000	12;1;1;1;1;1	12;1;1;1;1;1	11;0;0;0;0;0		6	12	12	11	7	7	7	7	4	5	7	7	7	7	4	5	7	6	7	7	4	5	51.5	51.5	48.1	24.409	231	231;237;562;567;586;586	0	323.31	34.2	32.9	26.8	32.9
tr|E9PCY7|E9PCY7_HUMANHeterogeneousnuclearribonucleoproteinHOS=HomosapiensGN=HNRNPH1PE=1SV=1;sp|P31943|HNRH1_HUMANHeterogeneousnuclearribonucleoproteinHOS=HomosapiensGN=HNRNPH1PE=1SV=4;tr|G8JLB6|G8JLB6_HUMANHeterogeneousnuclearribonucleoproteinHOS=HomosapiensGN=HNRNPH1PE=1SV=1;tr|D6RIU0|D6RIU0_HUMANHeterogeneousnuclearribonucleoproteinH(Fragment)OS=HomosapiensGN=HNRNPH1PE=1SV=1;tr|D6RBM0|D6RBM0_H…	tr|E9PCY7|E9PCY7_HUMANHeterogeneousnuclearribonucleoproteinHOS=HomosapiensGN=HNRNPH1PE=1SV=1;sp|P31943|HNRH1_HUMANHeterogeneousnuclearribonucleoproteinHOS=HomosapiensGN=HNRNPH1PE=1SV=4;tr|G8JLB6|G8JLB6_HUMANHeterogeneousnuclearribonucleoproteinHOS=HomosapiensGN=HNRNPH1PE=1SV=1;tr|D6RIU0|D6RIU0_HUMANHeterogeneousnuclearribonucleoproteinH(Fragment)OS=HomosapiensGN=HNRNPH1PE=1SV=1;tr|D6RBM0|D6RBM0_H…	0.35994	1.03824	1.89711	6.18047e+07	47382000	61434000	76598000	22246000	64168000	117250000	8;8;8;5;5;4;4;4;4;4;4;4;4;4;4;4;3;3;3;3;2;2;2;1	8;8;8;5;5;4;4;4;4;4;4;4;4;4;4;4;3;3;3;3;2;2;2;1	4;4;4;3;3;3;3;2;3;3;3;3;3;3;3;1;3;3;1;1;2;2;0;0	;;;;;;;;;;;;;;;	24	8	8	4	3	6	6	3	6	5	3	6	6	3	6	5	0	3	2	0	2	1	24.2	24.2	10.3	47.087	429	429;449;472;168;212;115;130;155;162;163;164;166;171;172;184;277;49;84;185;195;28;40;100;131	0	323.31	10.3	15.4	17.2	10.3
sp|P62913|RL11_HUMAN60SribosomalproteinL11OS=HomosapiensGN=RPL11PE=1SV=2;tr|Q5VVC9|Q5VVC9_HUMAN60SribosomalproteinL11(Fragment)OS=HomosapiensGN=RPL11PE=1SV=1;tr|Q5VVC8|Q5VVC8_HUMAN60SribosomalproteinL11(Fragment)OS=HomosapiensGN=RPL11PE=1SV=1	sp|P62913|RL11_HUMAN60SribosomalproteinL11OS=HomosapiensGN=RPL11PE=1SV=2;tr|Q5VVC9|Q5VVC9_HUMAN60SribosomalproteinL11(Fragment)OS=HomosapiensGN=RPL11PE=1SV=1;tr|Q5VVC8|Q5VVC8_HUMAN60SribosomalproteinL11(Fragment)OS=HomosapiensGN=RPL11PE=1SV=1	2.15791	1.79218	1.54593	3.76647e+06	0	4814700	6484700	8127700	6750200	5822700	2;1;1	2;1;1	2;1;1	;;	3	2	2	2	1	2	1	2	2	2	1	2	1	2	2	2	1	2	1	2	2	2	12.9	12.9	12.9	20.252	178	178;131;174	0	28.927	5.1	12.9	7.9	12.9
sp|Q9Y314|NOSIP_HUMANNitricoxidesynthase-interactingproteinOS=HomosapiensGN=NOSIPPE=1SV=1;tr|A0A075B6F9|A0A075B6F9_HUMANNitricoxidesynthase-interactingproteinOS=HomosapiensGN=NOSIPPE=1SV=1;tr|M0R3B2|M0R3B2_HUMANNitricoxidesynthase-interactingprotein(Fragment)OS=HomosapiensGN=NOSIPPE=1SV=5;tr|M0R1K2|M0R1K2_HUMANNitricoxidesynthase-interactingprotein(Fragment)OS=HomosapiensGN=NOSIPPE=1SV=1;tr|A0A07…	sp|Q9Y314|NOSIP_HUMANNitricoxidesynthase-interactingproteinOS=HomosapiensGN=NOSIPPE=1SV=1;tr|A0A075B6F9|A0A075B6F9_HUMANNitricoxidesynthase-interactingproteinOS=HomosapiensGN=NOSIPPE=1SV=1;tr|M0R3B2|M0R3B2_HUMANNitricoxidesynthase-interactingprotein(Fragment)OS=HomosapiensGN=NOSIPPE=1SV=5;tr|M0R1K2|M0R1K2_HUMANNitricoxidesynthase-interactingprotein(Fragment)OS=HomosapiensGN=NOSIPPE=1SV=1;tr|A0A07…	1.22766	1.31518	1.46465	11882000	35646000	0	0	14587000	15627000	17403000	6;6;5;3;3;2;1	6;6;5;3;3;2;1	6;6;5;3;3;2;1	;;;;	7	6	6	6	5	0	0	4	3	2	5	0	0	4	3	2	5	0	0	4	3	2	25.2	25.2	25.2	33.172	301	301;304;242;176;232;96;63	0	44.945	20.3	0	0	15
sp|P26373|RL13_HUMAN60SribosomalproteinL13OS=HomosapiensGN=RPL13PE=1SV=4;tr|J3QSB4|J3QSB4_HUMAN60SribosomalproteinL13(Fragment)OS=HomosapiensGN=RPL13PE=1SV=1;tr|H3BTH3|H3BTH3_HUMAN60SribosomalproteinL13OS=HomosapiensGN=RPL13PE=1SV=1	sp|P26373|RL13_HUMAN60SribosomalproteinL13OS=HomosapiensGN=RPL13PE=1SV=4;tr|J3QSB4|J3QSB4_HUMAN60SribosomalproteinL13(Fragment)OS=HomosapiensGN=RPL13PE=1SV=1	0.748906	1.14735	1.32773	2.46707e+07	74012000	0	0	18476000	28306000	32756000	5;4;1	5;4;1	5;4;1	;	3	5	5	5	4	1	0	4	5	4	4	1	0	4	5	4	4	1	0	4	5	4	25.1	25.1	25.1	24.261	211	211;126;63	0	82.735	20.4	5.2	0	20.4
sp|Q07021|C1QBP_HUMANComplementcomponent1Qsubcomponent-bindingprotein,mitochondrialOS=HomosapiensGN=C1QBPPE=1SV=1;tr|I3L3Q7|I3L3Q7_HUMANComplementcomponent1Qsubcomponent-bindingprotein,mitochondrial(Fragment)OS=HomosapiensGN=C1QBPPE=1SV=1;tr|I3L3B0|I3L3B0_HUMANComplementcomponent1Qsubcomponent-bindingprotein,mitochondrialOS=HomosapiensGN=C1QBPPE=1SV=1	sp|Q07021|C1QBP_HUMANComplementcomponent1Qsubcomponent-bindingprotein,mitochondrialOS=HomosapiensGN=C1QBPPE=1SV=1;tr|I3L3Q7|I3L3Q7_HUMANComplementcomponent1Qsubcomponent-bindingprotein,mitochondrial(Fragment)OS=HomosapiensGN=C1QBPPE=1SV=1;tr|I3L3B0|I3L3B0_HUMANComplementcomponent1Qsubcomponent-bindingprotein,mitochondrialOS=HomosapiensGN=C1QBPPE=1SV=1	0	3.60727	1.21294	1.18547e+07	35564000	0	0	0	42763000	14379000	5;3;3	5;3;3	5;3;3	;;	3	5	5	5	3	0	1	1	4	2	3	0	1	1	4	2	3	0	1	1	4	2	22	22	22	31.362	282	282;177;178	0	38.911	16.7	0	5	4.6
sp|Q92841|DDX17_HUMANProbableATP-dependentRNAhelicaseDDX17OS=HomosapiensGN=DDX17PE=1SV=2;tr|H3BLZ8|H3BLZ8_HUMANProbableATP-dependentRNAhelicaseDDX17OS=HomosapiensGN=DDX17PE=1SV=1	sp|Q92841|DDX17_HUMANProbableATP-dependentRNAhelicaseDDX17OS=HomosapiensGN=DDX17PE=1SV=2;tr|H3BLZ8|H3BLZ8_HUMANProbableATP-dependentRNAhelicaseDDX17OS=HomosapiensGN=DDX17PE=1SV=1	0	1.76038	1.01042	5153900	0	8561700	6900000	0	9072800	5207600	8;8	8;8	6;6	;	2	8	8	6	1	7	5	1	3	2	1	7	5	1	3	2	0	5	4	0	2	0	13.7	13.7	10.6	80.272	729	729;731	0	56.034	1.6	11.4	9.2	1.6
sp|P42167|LAP2B_HUMANLamina-associatedpolypeptide2,isoformsbeta/gammaOS=HomosapiensGN=TMPOPE=1SV=2;tr|G5E972|G5E972_HUMANLamina-associatedpolypeptide2,isoformsbeta/gammaOS=HomosapiensGN=TMPOPE=1SV=1;sp|P42166|LAP2A_HUMANLamina-associatedpolypeptide2,isoformalphaOS=HomosapiensGN=TMPOPE=1SV=2;tr|H0YJH7|H0YJH7_HUMANLamina-associatedpolypeptide2,isoformsbeta/gamma(Fragment)OS=HomosapiensGN=TMPOPE=1SV…	sp|P42167|LAP2B_HUMANLamina-associatedpolypeptide2,isoformsbeta/gammaOS=HomosapiensGN=TMPOPE=1SV=2;tr|G5E972|G5E972_HUMANLamina-associatedpolypeptide2,isoformsbeta/gammaOS=HomosapiensGN=TMPOPE=1SV=1;sp|P42166|LAP2A_HUMANLamina-associatedpolypeptide2,isoformalphaOS=HomosapiensGN=TMPOPE=1SV=2;tr|H0YJH7|H0YJH7_HUMANLamina-associatedpolypeptide2,isoformsbeta/gamma(Fragment)OS=HomosapiensGN=TMPOPE=1SV…	1.85542	0.74763	0.941498	13091900	5569700	14517000	19189000	24291000	9787900	12326000	11;10;7;6	11;10;7;6	11;10;7;6	;;;	4	11	11	11	2	4	9	8	2	2	2	4	9	8	2	2	2	4	9	8	2	2	34.4	34.4	34.4	50.67	454	454;414;694;237	0	125.82	4.8	11.5	28.9	24
sp|P61978|HNRPK_HUMANHeterogeneousnuclearribonucleoproteinKOS=HomosapiensGN=HNRNPKPE=1SV=1;tr|Q5T6W2|Q5T6W2_HUMANHeterogeneousnuclearribonucleoproteinK(Fragment)OS=HomosapiensGN=HNRNPKPE=1SV=1;tr|S4R457|S4R457_HUMANHeterogeneousnuclearribonucleoproteinKOS=HomosapiensGN=HNRNPKPE=1SV=1;tr|S4R359|S4R359_HUMANHeterogeneousnuclearribonucleoproteinK(Fragment)OS=HomosapiensGN=HNRNPKPE=1SV=1	sp|P61978|HNRPK_HUMANHeterogeneousnuclearribonucleoproteinKOS=HomosapiensGN=HNRNPKPE=1SV=1;tr|Q5T6W2|Q5T6W2_HUMANHeterogeneousnuclearribonucleoproteinK(Fragment)OS=HomosapiensGN=HNRNPKPE=1SV=1	0.418596	0.651143	0.880747	99872000	89030000	117180000	93406000	41806000	65031000	87962000	14;10;3;3	14;10;3;3	14;10;3;3	;	4	14	14	14	9	12	10	4	5	5	9	12	10	4	5	5	9	12	10	4	5	5	39.1	39.1	39.1	50.976	463	463;379;77;100	0	250.8	27	30.5	32.6	11.7
tr|E9PKG1|E9PKG1_HUMANProteinarginineN-methyltransferase1OS=HomosapiensGN=PRMT1PE=1SV=1;sp|Q99873|ANM1_HUMANProteinarginineN-methyltransferase1OS=HomosapiensGN=PRMT1PE=1SV=2;tr|H7C2I1|H7C2I1_HUMANProteinarginineN-methyltransferase1OS=HomosapiensGN=PRMT1PE=1SV=1;tr|E9PQ98|E9PQ98_HUMANProteinarginineN-methyltransferase1(Fragment)OS=HomosapiensGN=PRMT1PE=1SV=1;tr|E9PIX6|E9PIX6_HUMANProteinarginineN-…	tr|E9PKG1|E9PKG1_HUMANProteinarginineN-methyltransferase1OS=HomosapiensGN=PRMT1PE=1SV=1;sp|Q99873|ANM1_HUMANProteinarginineN-methyltransferase1OS=HomosapiensGN=PRMT1PE=1SV=2;tr|H7C2I1|H7C2I1_HUMANProteinarginineN-methyltransferase1OS=HomosapiensGN=PRMT1PE=1SV=1;tr|E9PQ98|E9PQ98_HUMANProteinarginineN-methyltransferase1(Fragment)OS=HomosapiensGN=PRMT1PE=1SV=1;tr|E9PIX6|E9PIX6_HUMANProteinarginineN-…	1.81673	0.747732	0.853301	1.88503e+07	0	24564000	31987000	34246000	14095000	16085000	10;10;10;7;7;6;6;5;3	10;10;10;7;7;6;6;5;3	10;10;10;7;7;6;6;5;3	;;;;;;;	9	10	10	10	0	5	5	4	5	4	0	5	5	4	5	4	0	5	5	4	5	4	30.2	30.2	30.2	37.709	325	325;361;371;205;209;160;238;285;394	0	78.147	0	16	19.4	12
sp|P38919|IF4A3_HUMANEukaryoticinitiationfactor4A-IIIOS=HomosapiensGN=EIF4A3PE=1SV=4;tr|I3L3H2|I3L3H2_HUMANEukaryoticinitiationfactor4A-III(Fragment)OS=HomosapiensGN=EIF4A3PE=1SV=1;tr|J3QQP0|J3QQP0_HUMANEukaryoticinitiationfactor4A-IOS=HomosapiensGN=EIF4A1PE=1SV=1;tr|E9PBH4|E9PBH4_HUMANEukaryoticinitiationfactor4A-IIOS=HomosapiensGN=EIF4A2PE=1SV=1;tr|F8WE11|F8WE11_HUMANEukaryoticinitiationfactor4…	sp|P38919|IF4A3_HUMANEukaryoticinitiationfactor4A-IIIOS=HomosapiensGN=EIF4A3PE=1SV=4	1.13482	0.748125	0.795257	1.15463e+07	0	15814000	18825000	13103000	8638100	9182300	12;2;1;1;1	12;2;1;1;1	11;1;0;0;0		5	12	12	11	1	6	8	4	4	4	1	6	8	4	4	4	1	6	8	4	3	3	37.7	37.7	33.8	46.871	411	411;125;95;96;97	0	123.08	1.9	16.8	26.5	8.3
tr|A0A0A0MR02|A0A0A0MR02_HUMANVoltage-dependentanion-selectivechannelprotein2(Fragment)OS=HomosapiensGN=VDAC2PE=1SV=1;sp|P45880|VDAC2_HUMANVoltage-dependentanion-selectivechannelprotein2OS=HomosapiensGN=VDAC2PE=1SV=2;tr|Q5JSD2|Q5JSD2_HUMANVoltage-dependentanion-selectivechannelprotein2(Fragment)OS=HomosapiensGN=VDAC2PE=1SV=5;tr|Q5JSD1|Q5JSD1_HUMANVoltage-dependentanion-selectivechannelprotein2(Fr…	tr|A0A0A0MR02|A0A0A0MR02_HUMANVoltage-dependentanion-selectivechannelprotein2(Fragment)OS=HomosapiensGN=VDAC2PE=1SV=1;sp|P45880|VDAC2_HUMANVoltage-dependentanion-selectivechannelprotein2OS=HomosapiensGN=VDAC2PE=1SV=2	0	1.46763	0.765584	8460600	10958000	7501200	6922600	0	12417000	6477300	5;5;2;2;1	5;5;2;2;1	5;5;2;2;1	;	5	5	5	5	3	2	3	1	3	3	3	2	3	1	3	3	3	2	3	1	3	3	22.3	22.3	22.3	30.348	282	282;294;195;204;109	0	44.958	14.5	11.3	14.9	7.1
sp|Q00839|HNRPU_HUMANHeterogeneousnuclearribonucleoproteinUOS=HomosapiensGN=HNRNPUPE=1SV=6;tr|Q5RI18|Q5RI18_HUMANHeterogeneousnuclearribonucleoproteinU(Fragment)OS=HomosapiensGN=HNRNPUPE=1SV=5	sp|Q00839|HNRPU_HUMANHeterogeneousnuclearribonucleoproteinUOS=HomosapiensGN=HNRNPUPE=1SV=6	0.715884	1.14892	0.689882	13007000	12648000	15418000	10955000	9311500	14944000	8973300	10;2	10;2	10;2		2	10	10	10	1	8	6	3	1	1	1	8	6	3	1	1	1	8	6	3	1	1	13.5	13.5	13.5	90.583	825	825;242	0	148.61	1.8	10.1	10.4	4.1
sp|Q96HS1|PGAM5_HUMANSerine/threonine-proteinphosphatasePGAM5,mitochondrialOS=HomosapiensGN=PGAM5PE=1SV=2;tr|F5GXG4|F5GXG4_HUMANSerine/threonine-proteinphosphatasePGAM5,mitochondrialOS=HomosapiensGN=PGAM5PE=1SV=1	sp|Q96HS1|PGAM5_HUMANSerine/threonine-proteinphosphatasePGAM5,mitochondrialOS=HomosapiensGN=PGAM5PE=1SV=2	1.43031	0.741759	0.578894	4.68548e+07	134020000	3833700	2710800	67017000	34755000	27124000	15;6	15;6	15;6		2	15	15	15	10	2	2	9	8	8	10	2	2	9	8	8	10	2	2	9	8	8	57.8	57.8	57.8	32.004	289	289;140	0	118.3	31.5	7.6	7.6	34.3
sp|P09012|SNRPA_HUMANU1smallnuclearribonucleoproteinAOS=HomosapiensGN=SNRPAPE=1SV=3;tr|M0R0G9|M0R0G9_HUMANU1smallnuclearribonucleoproteinAOS=HomosapiensGN=SNRPAPE=1SV=1;tr|M0QXK2|M0QXK2_HUMANU1smallnuclearribonucleoproteinA(Fragment)OS=HomosapiensGN=SNRPAPE=1SV=5;tr|M0R221|M0R221_HUMANU1smallnuclearribonucleoproteinA(Fragment)OS=HomosapiensGN=SNRPAPE=1SV=1;tr|M0R2B8|M0R2B8_HUMANU1smallnuclearribo…	sp|P09012|SNRPA_HUMANU1smallnuclearribonucleoproteinAOS=HomosapiensGN=SNRPAPE=1SV=3;tr|M0R0G9|M0R0G9_HUMANU1smallnuclearribonucleoproteinAOS=HomosapiensGN=SNRPAPE=1SV=1;tr|M0QXK2|M0QXK2_HUMANU1smallnuclearribonucleoproteinA(Fragment)OS=HomosapiensGN=SNRPAPE=1SV=5;tr|M0R221|M0R221_HUMANU1smallnuclearribonucleoproteinA(Fragment)OS=HomosapiensGN=SNRPAPE=1SV=1;tr|M0R2B8|M0R2B8_HUMANU1smallnuclearribo…	3.46301	0.862402	0.50793	10732000	32196000	0	0	37165000	9255300	5451100	4;3;3;3;3;3;2;2	4;3;3;3;3;3;2;2	4;3;3;3;3;3;2;2	;;;;;;;	8	4	4	4	3	1	0	3	2	2	3	1	0	3	2	2	3	1	0	3	2	2	15.6	15.6	15.6	31.279	282	282;87;129;142;148;256;184;225	0	26.07	13.1	2.5	0	13.1
sp|Q5VTE0|EF1A3_HUMANPutativeelongationfactor1-alpha-like3OS=HomosapiensGN=EEF1A1P5PE=5SV=1;sp|P68104|EF1A1_HUMANElongationfactor1-alpha1OS=HomosapiensGN=EEF1A1PE=1SV=1;tr|A0A087WVQ9|A0A087WVQ9_HUMANElongationfactor1-alpha1OS=HomosapiensGN=EEF1A1PE=1SV=1;tr|A0A087WV01|A0A087WV01_HUMANElongationfactor1-alphaOS=HomosapiensGN=EEF1A1PE=1SV=1;sp|Q05639|EF1A2_HUMANElongationfactor1-alpha2OS=Homosapiens…	sp|Q5VTE0|EF1A3_HUMANPutativeelongationfactor1-alpha-like3OS=HomosapiensGN=EEF1A1P5PE=5SV=1;sp|P68104|EF1A1_HUMANElongationfactor1-alpha1OS=HomosapiensGN=EEF1A1PE=1SV=1;tr|A0A087WVQ9|A0A087WVQ9_HUMANElongationfactor1-alpha1OS=HomosapiensGN=EEF1A1PE=1SV=1;tr|A0A087WV01|A0A087WV01_HUMANElongationfactor1-alphaOS=HomosapiensGN=EEF1A1PE=1SV=1;sp|Q05639|EF1A2_HUMANElongationfactor1-alpha2OS=Homosapiens…	4.25591	1.27478	0.491075	28572000	54584000	10219000	20913000	121600000	36423000	14031000	6;6;5;4;4;2;2	6;6;5;4;4;2;2	6;6;5;4;4;2;2	;;;;	7	6	6	6	6	2	5	6	5	3	6	2	5	6	5	3	6	2	5	6	5	3	16.7	16.7	16.7	50.184	462	462;462;441;426;463;107;145	0	120.96	16.7	7.4	11.5	16.7
sp|P62917|RL8_HUMAN60SribosomalproteinL8OS=HomosapiensGN=RPL8PE=1SV=2;tr|E9PKZ0|E9PKZ0_HUMAN60SribosomalproteinL8(Fragment)OS=HomosapiensGN=RPL8PE=1SV=1;tr|G3V1A1|G3V1A1_HUMAN60SribosomalproteinL8OS=HomosapiensGN=RPL8PE=1SV=1;tr|E9PKU4|E9PKU4_HUMAN60SribosomalproteinL8(Fragment)OS=HomosapiensGN=RPL8PE=1SV=1;tr|E9PP36|E9PP36_HUMAN60SribosomalproteinL8OS=HomosapiensGN=RPL8PE=1SV=1	sp|P62917|RL8_HUMAN60SribosomalproteinL8OS=HomosapiensGN=RPL8PE=1SV=2;tr|E9PKZ0|E9PKZ0_HUMAN60SribosomalproteinL8(Fragment)OS=HomosapiensGN=RPL8PE=1SV=1;tr|G3V1A1|G3V1A1_HUMAN60SribosomalproteinL8OS=HomosapiensGN=RPL8PE=1SV=1;tr|E9PKU4|E9PKU4_HUMAN60SribosomalproteinL8(Fragment)OS=HomosapiensGN=RPL8PE=1SV=1;tr|E9PP36|E9PP36_HUMAN60SribosomalproteinL8OS=HomosapiensGN=RPL8PE=1SV=1	0.127779	1.05069	0.422683	1.39147e+08	414710000	0	2730900	17780000	146200000	58815000	8;7;6;6;4	8;7;6;6;4	8;7;6;6;4	;;;;	5	8	8	8	6	1	2	4	5	4	6	1	2	4	5	4	6	1	2	4	5	4	25.3	25.3	25.3	28.024	257	257;205;167;235;148	0	63.199	22.2	4.3	7.4	16
sp|Q9NYF8|BCLF1_HUMANBcl-2-associatedtranscriptionfactor1OS=HomosapiensGN=BCLAF1PE=1SV=2;tr|E9PQN2|E9PQN2_HUMANBcl-2-associatedtranscriptionfactor1OS=HomosapiensGN=BCLAF1PE=1SV=1;tr|E9PKI6|E9PKI6_HUMANBcl-2-associatedtranscriptionfactor1OS=HomosapiensGN=BCLAF1PE=1SV=1;tr|E9PK09|E9PK09_HUMANBcl-2-associatedtranscriptionfactor1(Fragment)OS=HomosapiensGN=BCLAF1PE=1SV=5;tr|E9PJA7|E9PJA7_HUMANBcl-2-as…	sp|Q9NYF8|BCLF1_HUMANBcl-2-associatedtranscriptionfactor1OS=HomosapiensGN=BCLAF1PE=1SV=2;tr|E9PQN2|E9PQN2_HUMANBcl-2-associatedtranscriptionfactor1OS=HomosapiensGN=BCLAF1PE=1SV=1;tr|E9PKI6|E9PKI6_HUMANBcl-2-associatedtranscriptionfactor1OS=HomosapiensGN=BCLAF1PE=1SV=1;tr|E9PK09|E9PK09_HUMANBcl-2-associatedtranscriptionfactor1(Fragment)OS=HomosapiensGN=BCLAF1PE=1SV=5	0.27168	0.460951	0.268632	3.90497e+08	430330000	315810000	425350000	106090000	180000000	104900000	29;25;25;24;11;4;1	28;25;25;24;11;3;1	1;0;0;0;0;1;0	;;;	7	29	28	1	8	20	22	11	5	7	7	19	21	10	4	6	0	1	0	0	0	0	28.4	27.2	1.7	106.12	920	920;750;752;726;467;187;118	0	260.51	10.5	19	22.6	13.3
sp|Q9BUA3|CK084_HUMANUncharacterizedproteinC11orf84OS=HomosapiensGN=C11orf84PE=1SV=3;tr|H0YGK9|H0YGK9_HUMANUncharacterizedproteinC11orf84(Fragment)OS=HomosapiensGN=C11orf84PE=1SV=1;tr|H0YGY5|H0YGY5_HUMANUncharacterizedproteinC11orf84(Fragment)OS=HomosapiensGN=C11orf84PE=1SV=1	sp|Q9BUA3|CK084_HUMANUncharacterizedproteinC11orf84OS=HomosapiensGN=C11orf84PE=1SV=3	0.529484	0	0.265279	38186200	8576600	30802000	75180000	20219000	0	10130000	10;1;1	10;1;1	10;1;1		3	10	10	10	2	6	9	3	1	2	2	6	9	3	1	2	2	6	9	3	1	2	42.8	42.8	42.8	41.036	381	381;29;112	0	92.398	7.1	26	35.7	14.4
sp|P63261|ACTG_HUMANActin,cytoplasmic2OS=HomosapiensGN=ACTG1PE=1SV=1;sp|P60709|ACTB_HUMANActin,cytoplasmic1OS=HomosapiensGN=ACTBPE=1SV=1;tr|I3L3I0|I3L3I0_HUMANActin,cytoplasmic2(Fragment)OS=HomosapiensGN=ACTG1PE=1SV=1;tr|I3L1U9|I3L1U9_HUMANActin,cytoplasmic2(Fragment)OS=HomosapiensGN=ACTG1PE=1SV=1;tr|G5E9R0|G5E9R0_HUMANActin,cytoplasmic1OS=HomosapiensGN=ACTBPE=1SV=1;tr|K7EM38|K7EM38_HUMANActin,cy…	sp|P63261|ACTG_HUMANActin,cytoplasmic2OS=HomosapiensGN=ACTG1PE=1SV=1;sp|P60709|ACTB_HUMANActin,cytoplasmic1OS=HomosapiensGN=ACTBPE=1SV=1;tr|I3L3I0|I3L3I0_HUMANActin,cytoplasmic2(Fragment)OS=HomosapiensGN=ACTG1PE=1SV=1;tr|I3L1U9|I3L1U9_HUMANActin,cytoplasmic2(Fragment)OS=HomosapiensGN=ACTG1PE=1SV=1	0.44907	0.249069	0.220759	6.32997e+08	106600000	1279100000	513290000	284260000	157660000	139740000	19;19;11;11;8;8;8;8;8;8;7;7;7;7;6;6;4;4;3	19;19;11;11;8;8;8;8;8;8;7;7;7;7;6;6;4;4;3	7;7;3;3;1;1;1;1;1;3;0;0;2;2;0;2;2;2;0	;;;	19	19	19	7	8	14	13	13	10	10	8	14	13	13	10	10	4	5	4	6	3	4	51.2	51.2	25.1	41.792	375	375;375;214;214;125;133;164;164;198;242;99;103;1075;1075;80;1075;375;1038;52	0	323.31	30.4	40	39.7	44
sp|Q9Y657|SPIN1_HUMANSpindlin-1OS=HomosapiensGN=SPIN1PE=1SV=3;tr|Q5JZB7|Q5JZB7_HUMANSpindlin-2BOS=HomosapiensGN=SPIN2BPE=4SV=1;tr|A0A087X074|A0A087X074_HUMANSpindlin-2AOS=HomosapiensGN=SPIN2APE=4SV=1	sp|Q9Y657|SPIN1_HUMANSpindlin-1OS=HomosapiensGN=SPIN1PE=1SV=3	0	0	0.180037	169260000	263450000	109480000	134850000	0	0	30473000	10;1;1	10;1;1	6;0;0		3	10	10	6	9	5	8	1	1	2	9	5	8	1	1	2	6	3	4	1	0	1	48.5	48.5	29.8	29.6	262	262;157;157	0	107.92	45.8	24.4	38.9	3.8
sp|P04264|K2C1_HUMANKeratin,typeIIcytoskeletal1OS=HomosapiensGN=KRT1PE=1SV=6;CON__P04264	sp|P04264|K2C1_HUMANKeratin,typeIIcytoskeletal1OS=HomosapiensGN=KRT1PE=1SV=6;CON__P04264	0.80211	0.214396	0.174609	2.84063e+08	172450000	382030000	297710000	227850000	60902000	49600000	23;22	20;19	11;10	;	2	23	20	11	12	17	16	15	4	6	10	15	14	13	3	5	5	9	7	7	1	2	33.7	30.6	19.1	66.038	644	644;644	0	323.31	21	25.2	25.2	24.5
sp|Q9Y2W1|TR150_HUMANThyroidhormonereceptor-associatedprotein3OS=HomosapiensGN=THRAP3PE=1SV=2	sp|Q9Y2W1|TR150_HUMANThyroidhormonereceptor-associatedprotein3OS=HomosapiensGN=THRAP3PE=1SV=2	0.485982	0.147792	0.137428	4.52033e+08	372200000	424790000	559110000	219680000	66807000	62122000	30	30	29		1	30	30	29	12	23	23	14	9	11	12	23	23	14	9	11	11	22	22	13	8	10	24.8	24.8	24.8	108.66	955	955	0	323.31	11.8	20.6	19	14.3
CON__P02769;tr|H0YA55|H0YA55_HUMANSerumalbumin(Fragment)OS=HomosapiensGN=ALBPE=1SV=1;tr|D6RHD5|D6RHD5_HUMANSerumalbuminOS=HomosapiensGN=ALBPE=1SV=1	CON__P02769	0.0584579	0.046788	0.0527232	7.82786e+08	25747000	1327000000	995610000	45760000	36625000	41271000	20;4;3	20;4;3	16;0;0		3	20	20	16	4	17	14	9	5	6	4	17	14	9	5	6	3	14	10	7	3	5	28.7	28.7	23.9	69.293	607	607;454;459	0	323.31	7.2	26	19.1	14.7
sp|P08670|VIME_HUMANVimentinOS=HomosapiensGN=VIMPE=1SV=4;tr|B0YJC4|B0YJC4_HUMANVimentinOS=HomosapiensGN=VIMPE=1SV=1;tr|B0YJC5|B0YJC5_HUMANVimentinOS=HomosapiensGN=VIMPE=1SV=1;tr|Q5JVS8|Q5JVS8_HUMANVimentin(Fragment)OS=HomosapiensGN=VIMPE=1SV=1;sp|P17661|DESM_HUMANDesminOS=HomosapiensGN=DESPE=1SV=3;tr|H7C5W5|H7C5W5_HUMANPeripherin(Fragment)OS=HomosapiensGN=PRPHPE=1SV=1;sp|P41219|PERI_HUMANPeripher…	sp|P08670|VIME_HUMANVimentinOS=HomosapiensGN=VIMPE=1SV=4;tr|B0YJC4|B0YJC4_HUMANVimentinOS=HomosapiensGN=VIMPE=1SV=1	0.0812829	0.0342766	0.0430816	5.04485e+08	42214000	718080000	753160000	41006000	17292000	21734000	39;37;17;10;4;3;3;2;1;1;1;1;1;1;1;1;1;1;1;1;1;1	39;37;17;10;4;3;3;2;1;1;1;1;1;1;1;1;1;1;1;1;1;1	36;34;15;10;2;2;2;1;0;0;0;1;1;0;0;0;0;0;0;0;0;0	;	22	39	39	36	7	33	29	9	8	9	7	33	29	9	8	9	6	30	27	9	7	8	72.1	72.1	66.7	53.651	466	466;431;228;173;470;200;470;432;143;179;189;191;207;248;261;479;493;493;493;507;507;1649	0	323.31	15.5	66.3	63.3	20.8
sp|P35908|K22E_HUMANKeratin,typeIIcytoskeletal2epidermalOS=HomosapiensGN=KRT2PE=1SV=2;CON__P35908;sp|Q7Z794|K2C1B_HUMANKeratin,typeIIcytoskeletal1bOS=HomosapiensGN=KRT77PE=2SV=3;CON__Q7Z794;CON__Q9R0H5;CON__Q6NXH9;sp|P19013|K2C4_HUMANKeratin,typeIIcytoskeletal4OS=HomosapiensGN=KRT4PE=1SV=4;CON__P19013;tr|H0YID6|H0YID6_HUMANKeratin,typeIIcytoskeletal79(Fragment)OS=HomosapiensGN=KRT79PE=3SV=1	sp|P35908|K22E_HUMANKeratin,typeIIcytoskeletal2epidermalOS=HomosapiensGN=KRT2PE=1SV=2;CON__P35908	0.760335	0.14103	0.0371201	2.77693e+08	161170000	317730000	354180000	211140000	39163000	10308000	24;24;4;4;3;3;2;2;1	24;24;4;4;3;3;2;2;1	13;13;0;0;0;0;0;0;0	;	9	24	24	13	10	17	15	14	3	2	10	17	15	14	3	2	5	10	8	8	1	0	41.8	41.8	27.5	65.432	639	639;645;578;578;524;539;534;594;119	0	323.31	18.8	31.5	26	25.2
sp|P13645|K1C10_HUMANKeratin,typeIcytoskeletal10OS=HomosapiensGN=KRT10PE=1SV=6;CON__P13645;CON__P02535-1;sp|Q7Z3Z0|K1C25_HUMANKeratin,typeIcytoskeletal25OS=HomosapiensGN=KRT25PE=1SV=1;CON__Q7Z3Z0;sp|Q7Z3Y8|K1C27_HUMANKeratin,typeIcytoskeletal27OS=HomosapiensGN=KRT27PE=1SV=2;CON__Q7Z3Y8;sp|Q7Z3Y7|K1C28_HUMANKeratin,typeIcytoskeletal28OS=HomosapiensGN=KRT28PE=1SV=2;CON__Q148H6;CON__Q7Z3Y7;sp|Q99456…	sp|P13645|K1C10_HUMANKeratin,typeIcytoskeletal10OS=HomosapiensGN=KRT10PE=1SV=6;CON__P13645	1.39478	0.0517174	0.032967	170780000	120620000	192500000	199220000	238200000	8832300	5630100	25;25;8;2;2;2;2;2;2;2;2;2;1;1;1;1	25;25;8;2;2;2;2;2;2;2;2;2;1;1;1;1	20;20;5;1;1;1;1;1;1;1;0;0;0;0;0;0	;	16	25	25	20	10	16	17	17	3	3	10	16	17	17	3	3	9	12	13	14	3	3	40.1	40.1	35.1	58.826	584	584;593;570;450;450;459;459;464;464;486;494;494;468;468;525;525	0	323.31	21.1	28.6	35.6	24.5
sp|P23588|IF4B_HUMANEukaryotictranslationinitiationfactor4BOS=HomosapiensGN=EIF4BPE=1SV=2;tr|E7EX17|E7EX17_HUMANEukaryotictranslationinitiationfactor4BOS=HomosapiensGN=EIF4BPE=1SV=1;tr|F8VP89|F8VP89_HUMANEukaryotictranslationinitiationfactor4B(Fragment)OS=HomosapiensGN=EIF4BPE=1SV=1;tr|F8VX11|F8VX11_HUMANEukaryotictranslationinitiationfactor4B(Fragment)OS=HomosapiensGN=EIF4BPE=1SV=1;tr|F8VSC7|F8V…	sp|P23588|IF4B_HUMANEukaryotictranslationinitiationfactor4BOS=HomosapiensGN=EIF4BPE=1SV=2;tr|E7EX17|E7EX17_HUMANEukaryotictranslationinitiationfactor4BOS=HomosapiensGN=EIF4BPE=1SV=1;tr|F8VP89|F8VP89_HUMANEukaryotictranslationinitiationfactor4B(Fragment)OS=HomosapiensGN=EIF4BPE=1SV=1;tr|F8VX11|F8VX11_HUMANEukaryotictranslationinitiationfactor4B(Fragment)OS=HomosapiensGN=EIF4BPE=1SV=1	0.169791	0.03213	0.02222	5.77093e+08	54268000	1058500000	618510000	97985000	18542000	12823000	28;28;16;15;13;11;7;5;1;1;1	28;28;16;15;13;11;7;5;1;1;1	28;28;16;15;13;11;7;5;1;1;1	;;;	11	28	28	28	2	22	20	9	4	3	2	22	20	9	4	3	2	22	20	9	4	3	41.7	41.7	41.7	69.15	611	611;616;275;360;227;170;185;175;360;611;616	0	323.31	6.1	32.6	25	22.4
tr|A0A087X0P6|A0A087X0P6_HUMANProteinIGKV2D-29OS=HomosapiensGN=IGKV2D-29PE=1SV=1;tr|A0A0A0MRZ7|A0A0A0MRZ7_HUMANProteinIGKV2D-26(Fragment)OS=HomosapiensGN=IGKV2D-26PE=4SV=1;tr|A0A075B6S2|A0A075B6S2_HUMANProteinIGKV2D-29(Fragment)OS=HomosapiensGN=IGKV2D-29PE=1SV=1;tr|A0A0A0MTQ6|A0A0A0MTQ6_HUMANProteinIGKV2D-28OS=HomosapiensGN=IGKV2D-28PE=1SV=1;tr|A0A087X0Q4|A0A087X0Q4_HUMANProteinIGKV2-40OS=Homosap…	tr|A0A087X0P6|A0A087X0P6_HUMANProteinIGKV2D-29OS=HomosapiensGN=IGKV2D-29PE=1SV=1;tr|A0A0A0MRZ7|A0A0A0MRZ7_HUMANProteinIGKV2D-26(Fragment)OS=HomosapiensGN=IGKV2D-26PE=4SV=1;tr|A0A075B6S2|A0A075B6S2_HUMANProteinIGKV2D-29(Fragment)OS=HomosapiensGN=IGKV2D-29PE=1SV=1;tr|A0A0A0MTQ6|A0A0A0MTQ6_HUMANProteinIGKV2D-28OS=HomosapiensGN=IGKV2D-28PE=1SV=1;tr|A0A087X0Q4|A0A087X0Q4_HUMANProteinIGKV2-40OS=Homosap…	1.35046	0.124653	0	7.23674e+09	21680000000	30231000	0	9772900000	902080000	0	3;3;3;2;2;2;2;2;2;2;2;2;2;2	3;3;3;2;2;2;2;2;2;2;2;2;2;2	2;2;2;2;2;2;2;2;2;2;2;2;2;2	;;;;;;;;;;;;;	14	3	3	2	3	2	1	2	2	1	3	2	1	2	2	1	2	1	1	1	2	1	22.5	22.5	15.7	11.192	102	102;120;120;102;104;105;111;113;115;117;120;120;120;133	0	107.19	22.5	19.6	12.7	19.6
tr|A0A0A0MR66|A0A0A0MR66_HUMANRNAbindingmotifprotein10,isoformCRA_dOS=HomosapiensGN=RBM10PE=1SV=1;sp|P98175|RBM10_HUMANRNA-bindingprotein10OS=HomosapiensGN=RBM10PE=1SV=3	tr|A0A0A0MR66|A0A0A0MR66_HUMANRNAbindingmotifprotein10,isoformCRA_dOS=HomosapiensGN=RBM10PE=1SV=1;sp|P98175|RBM10_HUMANRNA-bindingprotein10OS=HomosapiensGN=RBM10PE=1SV=3	0.0776075	0	0	9.98653e+08	72460000	1281100000	1642400000	77503000	0	0	46;42	46;42	44;40	;	2	46	46	44	7	41	39	11	0	0	7	41	39	11	0	0	7	39	37	11	0	0	50.6	50.6	49.3	110.36	995	995;930	0	323.31	8.9	44.7	44.1	13.9
sp|P84090|ERH_HUMANEnhancerofrudimentaryhomologOS=HomosapiensGN=ERHPE=1SV=1;tr|G3V279|G3V279_HUMANEnhancerofrudimentaryhomologOS=HomosapiensGN=ERHPE=1SV=1	sp|P84090|ERH_HUMANEnhancerofrudimentaryhomologOS=HomosapiensGN=ERHPE=1SV=1;tr|G3V279|G3V279_HUMANEnhancerofrudimentaryhomologOS=HomosapiensGN=ERHPE=1SV=1	0	0	0	8.31533e+08	0	1073400000	1421200000	0	0	0	5;3	5;3	5;3	;	2	5	5	5	0	4	5	1	0	0	0	4	5	1	0	0	0	4	5	1	0	0	32.7	32.7	32.7	12.259	104	104;71	0	200.71	0	28.8	32.7	10.6
sp|O14744|ANM5_HUMANProteinarginineN-methyltransferase5OS=HomosapiensGN=PRMT5PE=1SV=4;tr|H0YJX6|H0YJX6_HUMANProteinarginineN-methyltransferase5(Fragment)OS=HomosapiensGN=PRMT5PE=1SV=1;tr|G3V580|G3V580_HUMANProteinarginineN-methyltransferase5(Fragment)OS=HomosapiensGN=PRMT5PE=1SV=1;tr|G3V5L5|G3V5L5_HUMANProteinarginineN-methyltransferase5(Fragment)OS=HomosapiensGN=PRMT5PE=1SV=5;tr|G3V2L6|G3V2L6_HU…	sp|O14744|ANM5_HUMANProteinarginineN-methyltransferase5OS=HomosapiensGN=PRMT5PE=1SV=4;tr|H0YJX6|H0YJX6_HUMANProteinarginineN-methyltransferase5(Fragment)OS=HomosapiensGN=PRMT5PE=1SV=1	0.316513	0.0327821	0	2.78475e+08	2776400	515420000	317230000	88141000	9129000	0	21;11;9;8;7;6;5;5;4;3;2;1;1	21;11;9;8;7;6;5;5;4;3;2;1;1	21;11;9;8;7;6;5;5;4;3;2;1;1	;	13	21	21	21	3	16	17	10	2	1	3	16	17	10	2	1	3	16	17	10	2	1	33.6	33.6	33.6	72.683	637	637;279;180;170;183;186;138;185;177;179;104;42;86	0	323.31	4.6	29.8	29.2	21.7
sp|O00268|TAF4_HUMANTranscriptioninitiationfactorTFIIDsubunit4OS=HomosapiensGN=TAF4PE=1SV=2;tr|A0A0G2JRY5|A0A0G2JRY5_HUMANTranscriptioninitiationfactorTFIIDsubunit4(Fragment)OS=HomosapiensGN=TAF4PE=4SV=1;tr|V9GY14|V9GY14_HUMANTranscriptioninitiationfactorTFIIDsubunit4(Fragment)OS=HomosapiensGN=TAF4PE=1SV=1;tr|V9GY03|V9GY03_HUMANTranscriptioninitiationfactorTFIIDsubunit4(Fragment)OS=HomosapiensGN=…	sp|O00268|TAF4_HUMANTranscriptioninitiationfactorTFIIDsubunit4OS=HomosapiensGN=TAF4PE=1SV=2;tr|A0A0G2JRY5|A0A0G2JRY5_HUMANTranscriptioninitiationfactorTFIIDsubunit4(Fragment)OS=HomosapiensGN=TAF4PE=4SV=1	0.0752622	0	0	1.78948e+08	16793000	268380000	251670000	13468000	0	0	26;16;4;3;1;1;1	26;16;4;3;1;1;1	26;16;4;3;1;1;1	;	7	26	26	26	3	24	21	4	2	1	3	24	21	4	2	1	3	24	21	4	2	1	30.1	30.1	30.1	110.11	1085	1085;457;215;79;862;865;867	0	323.31	3.4	29.2	27	4.1
sp|Q15149|PLEC_HUMANPlectinOS=HomosapiensGN=PLECPE=1SV=3;tr|E9PKG0|E9PKG0_HUMANPlectin(Fragment)OS=HomosapiensGN=PLECPE=1SV=1;tr|A0A075B730|A0A075B730_HUMANEpiplakinOS=HomosapiensGN=EPPK1PE=1SV=2;tr|A0A087X1U6|A0A087X1U6_HUMANEpiplakinOS=HomosapiensGN=EPPK1PE=1SV=1;sp|P58107|EPIPL_HUMANEpiplakinOS=HomosapiensGN=EPPK1PE=1SV=2;tr|E9PQ28|E9PQ28_HUMANPlectin(Fragment)OS=HomosapiensGN=PLECPE=1SV=1;tr|…	sp|Q15149|PLEC_HUMANPlectinOS=HomosapiensGN=PLECPE=1SV=3	0	0	0	122590000	0	181680000	186090000	0	0	0	84;5;4;4;3;2;2;1	84;5;4;4;3;2;2;1	67;0;4;4;3;0;0;1		8	84	84	67	0	63	63	0	0	0	0	63	63	0	0	0	0	49	51	0	0	0	22	22	17.5	531.78	4684	4684;190;5063;5088;5090;83;174;200	0	323.31	0	16.5	16.5	0
sp|Q13813|SPTN1_HUMANSpectrinalphachain,non-erythrocytic1OS=HomosapiensGN=SPTAN1PE=1SV=3;tr|A0A0D9SGF6|A0A0D9SGF6_HUMANSpectrinalphachain,non-erythrocytic1OS=HomosapiensGN=SPTAN1PE=1SV=1;tr|A0A0D9SFF6|A0A0D9SFF6_HUMANSpectrinalphachain,non-erythrocytic1(Fragment)OS=HomosapiensGN=SPTAN1PE=1SV=1;tr|A0A0D9SFH4|A0A0D9SFH4_HUMANSpectrinalphachain,non-erythrocytic1(Fragment)OS=HomosapiensGN=SPTAN1PE=1S…	sp|Q13813|SPTN1_HUMANSpectrinalphachain,non-erythrocytic1OS=HomosapiensGN=SPTAN1PE=1SV=3;tr|A0A0D9SGF6|A0A0D9SGF6_HUMANSpectrinalphachain,non-erythrocytic1OS=HomosapiensGN=SPTAN1PE=1SV=1	0	0	0	118500000	0	170620000	184880000	0	0	0	57;56;3;1	57;56;3;1	1;0;0;0	;	4	57	57	1	0	47	41	0	0	0	0	47	41	0	0	0	0	1	1	0	0	0	27.6	27.6	0.7	284.54	2472	2472;2498;153;68	0	323.31	0	24.3	20.5	0
sp|Q9BQA1|MEP50_HUMANMethylosomeprotein50OS=HomosapiensGN=WDR77PE=1SV=1;tr|H0Y711|H0Y711_HUMANMethylosomeprotein50(Fragment)OS=HomosapiensGN=WDR77PE=1SV=1	sp|Q9BQA1|MEP50_HUMANMethylosomeprotein50OS=HomosapiensGN=WDR77PE=1SV=1;tr|H0Y711|H0Y711_HUMANMethylosomeprotein50(Fragment)OS=HomosapiensGN=WDR77PE=1SV=1	1.57047	0.831457	0	88209000	61723000	119750000	83154000	138530000	73342000	0	6;3	6;3	6;3	;	2	6	6	6	3	3	3	6	2	1	3	3	3	6	2	1	3	3	3	6	2	1	21.3	21.3	21.3	36.724	342	342;291	0	177.11	14.9	12.3	12	21.3
sp|P35527|K1C9_HUMANKeratin,typeIcytoskeletal9OS=HomosapiensGN=KRT9PE=1SV=3;CON__P35527;tr|K7EQQ3|K7EQQ3_HUMANKeratin,typeIcytoskeletal9OS=HomosapiensGN=KRT9PE=1SV=1	sp|P35527|K1C9_HUMANKeratin,typeIcytoskeletal9OS=HomosapiensGN=KRT9PE=1SV=3;CON__P35527;tr|K7EQQ3|K7EQQ3_HUMANKeratin,typeIcytoskeletal9OS=HomosapiensGN=KRT9PE=1SV=1	0.776869	0	0	8.76003e+07	44071000	124050000	94680000	68054000	0	0	19;19;10	18;18;10	18;18;10	;;	3	19	18	18	6	13	11	9	0	0	6	13	11	8	0	0	6	13	11	8	0	0	37.7	37.7	37.7	62.064	623	623;623;390	0	320.05	11.1	24.4	24.9	19.4
sp|Q01082|SPTB2_HUMANSpectrinbetachain,non-erythrocytic1OS=HomosapiensGN=SPTBN1PE=1SV=2;tr|A0A087WUZ3|A0A087WUZ3_HUMANSpectrinbetachain,non-erythrocytic1OS=HomosapiensGN=SPTBN1PE=1SV=1;tr|F8W6C1|F8W6C1_HUMANSpectrinbetachain,non-erythrocytic1(Fragment)OS=HomosapiensGN=SPTBN1PE=1SV=1;tr|A4QPE4|A4QPE4_HUMANSPTBN2proteinOS=HomosapiensGN=SPTBN2PE=1SV=1;sp|P11277|SPTB1_HUMANSpectrinbetachain,erythrocy…	sp|Q01082|SPTB2_HUMANSpectrinbetachain,non-erythrocytic1OS=HomosapiensGN=SPTBN1PE=1SV=2;tr|A0A087WUZ3|A0A087WUZ3_HUMANSpectrinbetachain,non-erythrocytic1OS=HomosapiensGN=SPTBN1PE=1SV=1	0	0	0	7.44133e+07	0	104970000	118270000	0	0	0	53;53;16;5;2;1;1;1;1	53;53;16;5;2;1;1;1;1	48;48;11;0;0;0;0;0;0	;	9	53	53	48	2	42	31	0	0	0	2	42	31	0	0	0	2	37	29	0	0	0	27.9	27.9	25.3	274.61	2364	2364;2366;690;934;2137;117;2002;2564;2564	0	323.31	1.2	21.8	16.6	0
sp|P63173|RL38_HUMAN60SribosomalproteinL38OS=HomosapiensGN=RPL38PE=1SV=2;tr|J3KT73|J3KT73_HUMAN60SribosomalproteinL38OS=HomosapiensGN=RPL38PE=1SV=1;tr|J3QL01|J3QL01_HUMAN60SribosomalproteinL38OS=HomosapiensGN=RPL38PE=1SV=1;tr|J3KSP2|J3KSP2_HUMAN60SribosomalproteinL38(Fragment)OS=HomosapiensGN=RPL38PE=1SV=1	sp|P63173|RL38_HUMAN60SribosomalproteinL38OS=HomosapiensGN=RPL38PE=1SV=2;tr|J3KT73|J3KT73_HUMAN60SribosomalproteinL38OS=HomosapiensGN=RPL38PE=1SV=1;tr|J3QL01|J3QL01_HUMAN60SribosomalproteinL38OS=HomosapiensGN=RPL38PE=1SV=1;tr|J3KSP2|J3KSP2_HUMAN60SribosomalproteinL38(Fragment)OS=HomosapiensGN=RPL38PE=1SV=1	0.353064	0	0	69520000	208560000	0	0	24545000	0	0	6;5;5;3	6;5;5;3	6;5;5;3	;;;	4	6	6	6	6	0	0	6	0	0	6	0	0	6	0	0	6	0	0	6	0	0	50	50	50	8.2178	70	70;64;67;21	0	45.365	50	0	0	50
sp|P62805|H4_HUMANHistoneH4OS=HomosapiensGN=HIST1H4APE=1SV=2	sp|P62805|H4_HUMANHistoneH4OS=HomosapiensGN=HIST1H4APE=1SV=2	0	0	0	4.82253e+07	0	76536000	68140000	0	0	0	6	6	6		1	6	6	6	0	6	5	1	0	0	0	6	5	1	0	0	0	6	5	1	0	0	51.5	51.5	51.5	11.367	103	103	0	44.493	0	51.5	50.5	7.8
sp|Q8IWI9|MGAP_HUMANMAXgene-associatedproteinOS=HomosapiensGN=MGAPE=1SV=3;tr|H3BP52|H3BP52_HUMANMAXgene-associatedprotein(Fragment)OS=HomosapiensGN=MGAPE=1SV=1;tr|H3BTF4|H3BTF4_HUMANMAXgene-associatedprotein(Fragment)OS=HomosapiensGN=MGAPE=1SV=1	sp|Q8IWI9|MGAP_HUMANMAXgene-associatedproteinOS=HomosapiensGN=MGAPE=1SV=3	0.262826	0	0	4.63577e+07	12960000	29577000	96536000	12184000	0	0	27;4;4	27;4;4	16;4;4		3	27	27	16	2	19	17	3	0	0	2	19	17	3	0	0	2	11	12	2	0	0	14.1	14.1	9.2	331.83	3026	3026;1086;1138	0	248.77	0.9	10.5	8.7	1.4
REV__sp|Q15506|SP17_HUMANSpermsurfaceproteinSp17OS=HomosapiensGN=SPA17PE=1SV=1	REV__sp|Q15506|SP17_HUMANSpermsurfaceproteinSp17OS=HomosapiensGN=SPA17PE=1SV=1	0	0	0	41860000	125580000	0	0	0	0	0	1	1	1		1	1	1	1	1	0	1	1	0	0	1	0	1	1	0	0	1	0	1	1	0	0	0	0	0	17.406	151	151	0.0021598	6.6673	0	0	0	0
sp|Q15208|STK38_HUMANSerine/threonine-proteinkinase38OS=HomosapiensGN=STK38PE=1SV=1	sp|Q15208|STK38_HUMANSerine/threonine-proteinkinase38OS=HomosapiensGN=STK38PE=1SV=1	0.132573	0	0	36586000	0	56341000	53417000	4850300	0	0	10	10	8		1	10	10	8	0	10	6	2	0	0	0	10	6	2	0	0	0	8	5	2	0	0	25.2	25.2	22.2	54.19	465	465	0	68.964	0	25.2	16.1	4.7
sp|P0DMV9|HS71B_HUMANHeatshock70kDaprotein1BOS=HomosapiensGN=HSPA1BPE=1SV=1;sp|P0DMV8|HS71A_HUMANHeatshock70kDaprotein1AOS=HomosapiensGN=HSPA1APE=1SV=1;tr|A0A0G2JIW1|A0A0G2JIW1_HUMANHeatshock70kDaprotein1BOS=HomosapiensGN=HSPA1BPE=4SV=1;tr|V9GZ37|V9GZ37_HUMANHeatshock70kDaprotein1AOS=HomosapiensGN=HSPA1APE=1SV=1	sp|P0DMV9|HS71B_HUMANHeatshock70kDaprotein1BOS=HomosapiensGN=HSPA1BPE=1SV=1;sp|P0DMV8|HS71A_HUMANHeatshock70kDaprotein1AOS=HomosapiensGN=HSPA1APE=1SV=1;tr|A0A0G2JIW1|A0A0G2JIW1_HUMANHeatshock70kDaprotein1BOS=HomosapiensGN=HSPA1BPE=4SV=1;tr|V9GZ37|V9GZ37_HUMANHeatshock70kDaprotein1AOS=HomosapiensGN=HSPA1APE=1SV=1	0.297536	0	0	3.45033e+07	0	70563000	32947000	10266000	0	0	18;18;18;9	18;18;18;9	8;8;8;3	;;;	4	18	18	8	1	16	12	3	0	0	1	16	12	3	0	0	0	8	5	1	0	0	34.2	34.2	13.9	70.051	641	641;641;642;476	0	152.99	2	30.1	22.3	6.2
sp|Q99878|H2A1J_HUMANHistoneH2Atype1-JOS=HomosapiensGN=HIST1H2AJPE=1SV=3;sp|Q96KK5|H2A1H_HUMANHistoneH2Atype1-HOS=HomosapiensGN=HIST1H2AHPE=1SV=3;sp|Q9BTM1|H2AJ_HUMANHistoneH2A.JOS=HomosapiensGN=H2AFJPE=1SV=1;sp|Q16777|H2A2C_HUMANHistoneH2Atype2-COS=HomosapiensGN=HIST2H2ACPE=1SV=4;sp|Q93077|H2A1C_HUMANHistoneH2Atype1-COS=HomosapiensGN=HIST1H2ACPE=1SV=3;sp|Q7L7L0|H2A3_HUMANHistoneH2Atype3OS=Homosa…	sp|Q99878|H2A1J_HUMANHistoneH2Atype1-JOS=HomosapiensGN=HIST1H2AJPE=1SV=3;sp|Q96KK5|H2A1H_HUMANHistoneH2Atype1-HOS=HomosapiensGN=HIST1H2AHPE=1SV=3;sp|Q9BTM1|H2AJ_HUMANHistoneH2A.JOS=HomosapiensGN=H2AFJPE=1SV=1;sp|Q16777|H2A2C_HUMANHistoneH2Atype2-COS=HomosapiensGN=HIST2H2ACPE=1SV=4;sp|Q93077|H2A1C_HUMANHistoneH2Atype1-COS=HomosapiensGN=HIST1H2ACPE=1SV=3;sp|Q7L7L0|H2A3_HUMANHistoneH2Atype3OS=Homosa…	0	0	0	3.28263e+07	0	36127000	62352000	0	0	0	2;2;2;2;2;2;2;2;2;2;1;1;1;1;1;1;1	2;2;2;2;2;2;2;2;2;2;1;1;1;1;1;1;1	2;2;2;2;2;2;2;2;2;2;1;1;1;1;1;1;1	;;;;;;;;;;;;;;;;	17	2	2	2	1	2	2	1	0	0	1	2	2	1	0	0	1	2	2	1	0	0	21.9	21.9	21.9	13.936	128	128;128;129;129;130;130;130;130;130;130;92;122;128;128;130;131;143	0	61.439	7	21.9	21.9	7
tr|J3QS39|J3QS39_HUMANPolyubiquitin-B(Fragment)OS=HomosapiensGN=UBBPE=1SV=1;tr|J3QTR3|J3QTR3_HUMANUbiquitin-40SribosomalproteinS27a(Fragment)OS=HomosapiensGN=RPS27APE=1SV=1;tr|F5H6Q2|F5H6Q2_HUMANPolyubiquitin-C(Fragment)OS=HomosapiensGN=UBCPE=1SV=5;sp|P62987|RL40_HUMANUbiquitin-60SribosomalproteinL40OS=HomosapiensGN=UBA52PE=1SV=2;tr|F5GYU3|F5GYU3_HUMANPolyubiquitin-C(Fragment)OS=HomosapiensGN=UBC…	tr|J3QS39|J3QS39_HUMANPolyubiquitin-B(Fragment)OS=HomosapiensGN=UBBPE=1SV=1;tr|J3QTR3|J3QTR3_HUMANUbiquitin-40SribosomalproteinS27a(Fragment)OS=HomosapiensGN=RPS27APE=1SV=1;tr|F5H6Q2|F5H6Q2_HUMANPolyubiquitin-C(Fragment)OS=HomosapiensGN=UBCPE=1SV=5;sp|P62987|RL40_HUMANUbiquitin-60SribosomalproteinL40OS=HomosapiensGN=UBA52PE=1SV=2;tr|F5GYU3|F5GYU3_HUMANPolyubiquitin-C(Fragment)OS=HomosapiensGN=UBC…	0	0	0	2.69377e+07	14187000	15368000	51258000	0	0	0	3;3;3;3;3;3;3;3;3;3;3;3;3;3;3;3;3;2;2;2;2;2;1;1;1;1	3;3;3;3;3;3;3;3;3;3;3;3;3;3;3;3;3;2;2;2;2;2;1;1;1;1	3;3;3;3;3;3;3;3;3;3;3;3;3;3;3;3;3;2;2;2;2;2;1;1;1;1	;;;;;;;;;;;;;;;;;;;;;	26	3	3	3	2	2	2	2	1	1	2	2	2	2	1	1	2	2	2	2	1	1	36.6	36.6	36.6	10.469	93	93;106;123;128;134;136;149;153;155;156;161;169;206;229;229;305;685;63;114;138;224;229;43;53;61;98	0	99.491	26.9	26.9	26.9	19.4
sp|Q13838|DX39B_HUMANSpliceosomeRNAhelicaseDDX39BOS=HomosapiensGN=DDX39BPE=1SV=1;tr|Q5STU3|Q5STU3_HUMANSpliceosomeRNAhelicaseDDX39BOS=HomosapiensGN=DDX39BPE=1SV=2;tr|A0A0G2JJZ9|A0A0G2JJZ9_HUMANSpliceosomeRNAhelicaseDDX39B(Fragment)OS=HomosapiensGN=DDX39BPE=4SV=1;tr|F6WLT2|F6WLT2_HUMANSpliceosomeRNAhelicaseDDX39B(Fragment)OS=HomosapiensGN=DDX39BPE=1SV=1;tr|A0A0A0MT12|A0A0A0MT12_HUMANSpliceosomeRNA…	sp|Q13838|DX39B_HUMANSpliceosomeRNAhelicaseDDX39BOS=HomosapiensGN=DDX39BPE=1SV=1;tr|Q5STU3|Q5STU3_HUMANSpliceosomeRNAhelicaseDDX39BOS=HomosapiensGN=DDX39BPE=1SV=2;tr|A0A0G2JJZ9|A0A0G2JJZ9_HUMANSpliceosomeRNAhelicaseDDX39B(Fragment)OS=HomosapiensGN=DDX39BPE=4SV=1;tr|F6WLT2|F6WLT2_HUMANSpliceosomeRNAhelicaseDDX39B(Fragment)OS=HomosapiensGN=DDX39BPE=1SV=1;tr|A0A0A0MT12|A0A0A0MT12_HUMANSpliceosomeRNA…	0	0	0	2.64497e+07	0	24714000	54635000	0	0	0	11;10;9;7;6;6;5;5;4;3;3;3;2	11;10;9;7;6;6;5;5;4;3;3;3;2	4;4;4;3;2;2;1;3;1;1;1;1;2	;;;;;	13	11	11	4	0	5	8	0	0	1	0	5	8	0	0	1	0	2	3	0	0	0	26.2	26.2	13.1	48.991	428	428;425;328;289;236;238;231;245;187;187;187;197;141	0	69.725	0	10.5	19.9	0
tr|B1AK87|B1AK87_HUMANCappingprotein(Actinfilament)muscleZ-line,beta,isoformCRA_aOS=HomosapiensGN=CAPZBPE=1SV=1;tr|B1AK88|B1AK88_HUMANCappingprotein(Actinfilament)muscleZ-line,beta,isoformCRA_dOS=HomosapiensGN=CAPZBPE=1SV=1;sp|P47756|CAPZB_HUMANF-actin-cappingproteinsubunitbetaOS=HomosapiensGN=CAPZBPE=1SV=4;tr|B1AK85|B1AK85_HUMANF-actin-cappingproteinsubunitbetaOS=HomosapiensGN=CAPZBPE=1SV=1	tr|B1AK87|B1AK87_HUMANCappingprotein(Actinfilament)muscleZ-line,beta,isoformCRA_aOS=HomosapiensGN=CAPZBPE=1SV=1;tr|B1AK88|B1AK88_HUMANCappingprotein(Actinfilament)muscleZ-line,beta,isoformCRA_dOS=HomosapiensGN=CAPZBPE=1SV=1;sp|P47756|CAPZB_HUMANF-actin-cappingproteinsubunitbetaOS=HomosapiensGN=CAPZBPE=1SV=4;tr|B1AK85|B1AK85_HUMANF-actin-cappingproteinsubunitbetaOS=HomosapiensGN=CAPZBPE=1SV=1	1.69107	0	0	2.34863e+07	51901000	18558000	0	39717000	0	0	10;10;8;5	10;10;8;5	10;10;8;5	;;;	4	10	10	10	6	5	2	7	1	1	6	5	2	7	1	1	6	5	2	7	1	1	35.8	35.8	35.8	29.295	260	260;301;277;260	0	140.81	23.1	21.9	11.5	26.2
tr|F8W0Q9|F8W0Q9_HUMANPeriphilin-1OS=HomosapiensGN=PPHLN1PE=1SV=1;sp|Q8NEY8|PPHLN_HUMANPeriphilin-1OS=HomosapiensGN=PPHLN1PE=1SV=2;tr|F8WF16|F8WF16_HUMANPeriphilin-1OS=HomosapiensGN=PPHLN1PE=1SV=1;tr|B7Z8L1|B7Z8L1_HUMANPeriphilin-1OS=HomosapiensGN=PPHLN1PE=1SV=1;tr|F8W6A0|F8W6A0_HUMANPeriphilin-1OS=HomosapiensGN=PPHLN1PE=1SV=1;tr|F8VPY7|F8VPY7_HUMANPeriphilin-1(Fragment)OS=HomosapiensGN=PPHLN1PE=…	tr|F8W0Q9|F8W0Q9_HUMANPeriphilin-1OS=HomosapiensGN=PPHLN1PE=1SV=1;sp|Q8NEY8|PPHLN_HUMANPeriphilin-1OS=HomosapiensGN=PPHLN1PE=1SV=2;tr|F8WF16|F8WF16_HUMANPeriphilin-1OS=HomosapiensGN=PPHLN1PE=1SV=1;tr|B7Z8L1|B7Z8L1_HUMANPeriphilin-1OS=HomosapiensGN=PPHLN1PE=1SV=1;tr|F8W6A0|F8W6A0_HUMANPeriphilin-1OS=HomosapiensGN=PPHLN1PE=1SV=1	0	0	0	2.12877e+07	0	42564000	21299000	0	0	0	10;9;7;7;7;3;3;2;1	10;9;7;7;7;3;3;2;1	10;9;7;7;7;3;3;2;1	;;;;	9	10	10	10	1	9	3	1	0	0	1	9	3	1	0	0	1	9	3	1	0	0	23.4	23.4	23.4	44.682	385	385;458;303;340;363;161;168;107;130	0	67.992	1.8	21.6	9.4	1.8
sp|Q9H3K6|BOLA2_HUMANBolA-likeprotein2OS=HomosapiensGN=BOLA2PE=1SV=1;tr|H3BV85|H3BV85_HUMANBolA-likeprotein2(Fragment)OS=HomosapiensGN=BOLA2BPE=1SV=1;tr|H3BTW0|H3BTW0_HUMANUncharacterizedprotein(Fragment)OS=HomosapiensPE=3SV=1;tr|A0A0B4J295|A0A0B4J295_HUMANUncharacterizedproteinOS=HomosapiensPE=3SV=1;tr|H3BVE0|H3BVE0_HUMANUncharacterizedprotein(Fragment)OS=HomosapiensPE=3SV=1	sp|Q9H3K6|BOLA2_HUMANBolA-likeprotein2OS=HomosapiensGN=BOLA2PE=1SV=1;tr|H3BV85|H3BV85_HUMANBolA-likeprotein2(Fragment)OS=HomosapiensGN=BOLA2BPE=1SV=1;tr|H3BTW0|H3BTW0_HUMANUncharacterizedprotein(Fragment)OS=HomosapiensPE=3SV=1;tr|A0A0B4J295|A0A0B4J295_HUMANUncharacterizedproteinOS=HomosapiensPE=3SV=1;tr|H3BVE0|H3BVE0_HUMANUncharacterizedprotein(Fragment)OS=HomosapiensPE=3SV=1	0.616017	0	0	19314400	44134000	8827400	4981800	11898000	0	0	4;2;2;2;2	4;2;2;2;2	4;2;2;2;2	;;;;	5	4	4	4	3	2	2	2	0	0	3	2	2	2	0	0	3	2	2	2	0	0	50	50	50	10.116	86	86;88;89;124;249	0	123.4	39.5	20.9	20.9	29.1
sp|P09661|RU2A_HUMANU2smallnuclearribonucleoproteinA'OS=HomosapiensGN=SNRPA1PE=1SV=2;tr|H0YMA0|H0YMA0_HUMANU2smallnuclearribonucleoproteinA'(Fragment)OS=HomosapiensGN=SNRPA1PE=1SV=1;tr|H0YLR3|H0YLR3_HUMANU2smallnuclearribonucleoproteinA'(Fragment)OS=HomosapiensGN=SNRPA1PE=1SV=1;tr|H0YKK0|H0YKK0_HUMANSmallnuclearribonucleoproteinpolypeptideA',isoformCRA_aOS=HomosapiensGN=SNRPA1PE=1SV=1	sp|P09661|RU2A_HUMANU2smallnuclearribonucleoproteinA'OS=HomosapiensGN=SNRPA1PE=1SV=2;tr|H0YMA0|H0YMA0_HUMANU2smallnuclearribonucleoproteinA'(Fragment)OS=HomosapiensGN=SNRPA1PE=1SV=1;tr|H0YLR3|H0YLR3_HUMANU2smallnuclearribonucleoproteinA'(Fragment)OS=HomosapiensGN=SNRPA1PE=1SV=1;tr|H0YKK0|H0YKK0_HUMANSmallnuclearribonucleoproteinpolypeptideA',isoformCRA_aOS=HomosapiensGN=SNRPA1PE=1SV=1	0	0	0	1.88857e+07	56657000	0	0	0	0	0	6;4;3;3	6;4;3;3	6;4;3;3	;;;	4	6	6	6	6	1	0	0	0	1	6	1	0	0	0	1	6	1	0	0	0	1	24.7	24.7	24.7	28.415	255	255;142;89;154	0	53.315	24.7	3.1	0	0
tr|J3QLE5|J3QLE5_HUMANSmallnuclearribonucleoprotein-associatedproteinN(Fragment)OS=HomosapiensGN=SNRPNPE=4SV=1;sp|P63162|RSMN_HUMANSmallnuclearribonucleoprotein-associatedproteinNOS=HomosapiensGN=SNRPNPE=1SV=1;sp|P14678|RSMB_HUMANSmallnuclearribonucleoprotein-associatedproteinsBandB'OS=HomosapiensGN=SNRPBPE=1SV=2;tr|A8MT02|A8MT02_HUMANSmallnuclearribonucleoprotein-associatedproteinsBandB'OS=Homos…	tr|J3QLE5|J3QLE5_HUMANSmallnuclearribonucleoprotein-associatedproteinN(Fragment)OS=HomosapiensGN=SNRPNPE=4SV=1;sp|P63162|RSMN_HUMANSmallnuclearribonucleoprotein-associatedproteinNOS=HomosapiensGN=SNRPNPE=1SV=1;sp|P14678|RSMB_HUMANSmallnuclearribonucleoprotein-associatedproteinsBandB'OS=HomosapiensGN=SNRPBPE=1SV=2;tr|A8MT02|A8MT02_HUMANSmallnuclearribonucleoprotein-associatedproteinsBandB'OS=Homos…	0	0	0	1.71207e+07	16068000	15541000	19753000	0	0	0	3;3;3;3;2;2	3;3;3;3;2;2	3;3;3;3;2;2	;;;;;	6	3	3	3	2	3	3	0	1	0	2	3	3	0	1	0	2	3	3	0	1	0	13.6	13.6	13.6	17.546	169	169;240;240;288;59;70	0	17.728	8.9	13.6	13.6	0
sp|P11142|HSP7C_HUMANHeatshockcognate71kDaproteinOS=HomosapiensGN=HSPA8PE=1SV=1;tr|E9PKE3|E9PKE3_HUMANHeatshockcognate71kDaproteinOS=HomosapiensGN=HSPA8PE=1SV=1;tr|E9PN89|E9PN89_HUMANHeatshockcognate71kDaprotein(Fragment)OS=HomosapiensGN=HSPA8PE=1SV=1;tr|E9PNE6|E9PNE6_HUMANHeatshockcognate71kDaproteinOS=HomosapiensGN=HSPA8PE=1SV=1;tr|E9PLF4|E9PLF4_HUMANHeatshockcognate71kDaprotein(Fragment)OS=Hom…	sp|P11142|HSP7C_HUMANHeatshockcognate71kDaproteinOS=HomosapiensGN=HSPA8PE=1SV=1;tr|E9PKE3|E9PKE3_HUMANHeatshockcognate71kDaproteinOS=HomosapiensGN=HSPA8PE=1SV=1;tr|E9PN89|E9PN89_HUMANHeatshockcognate71kDaprotein(Fragment)OS=HomosapiensGN=HSPA8PE=1SV=1;tr|E9PNE6|E9PNE6_HUMANHeatshockcognate71kDaproteinOS=HomosapiensGN=HSPA8PE=1SV=1;tr|E9PLF4|E9PLF4_HUMANHeatshockcognate71kDaprotein(Fragment)OS=Hom…	0.68289	0	0	16663000	0	28168000	21821000	11379000	0	0	14;13;9;8;7;7;6;6;6;6;5;4;4;2;2	12;11;9;6;6;5;5;5;5;5;4;3;3;1;1	10;9;7;5;5;3;5;5;5;4;3;3;3;1;1	;;;;;	15	14	12	10	1	11	9	4	1	0	0	9	8	3	1	0	0	8	6	2	1	0	29.4	26	22.1	70.897	646	646;627;312;500;187;639;171;178;184;410;168;132;137;151;223	0	90.09	2	22.6	18.4	8.5
sp|Q8WWY3|PRP31_HUMANU4/U6smallnuclearribonucleoproteinPrp31OS=HomosapiensGN=PRPF31PE=1SV=2;tr|E7EVX8|E7EVX8_HUMANU4/U6smallnuclearribonucleoproteinPrp31OS=HomosapiensGN=PRPF31PE=1SV=1;tr|E7EU94|E7EU94_HUMANU4/U6smallnuclearribonucleoproteinPrp31(Fragment)OS=HomosapiensGN=PRPF31PE=1SV=5;tr|E7ESX0|E7ESX0_HUMANU4/U6smallnuclearribonucleoproteinPrp31(Fragment)OS=HomosapiensGN=PRPF31PE=1SV=1;tr|E7EN7…	sp|Q8WWY3|PRP31_HUMANU4/U6smallnuclearribonucleoproteinPrp31OS=HomosapiensGN=PRPF31PE=1SV=2;tr|E7EVX8|E7EVX8_HUMANU4/U6smallnuclearribonucleoproteinPrp31OS=HomosapiensGN=PRPF31PE=1SV=1;tr|E7EU94|E7EU94_HUMANU4/U6smallnuclearribonucleoproteinPrp31(Fragment)OS=HomosapiensGN=PRPF31PE=1SV=5;tr|E7ESX0|E7ESX0_HUMANU4/U6smallnuclearribonucleoproteinPrp31(Fragment)OS=HomosapiensGN=PRPF31PE=1SV=1;tr|E7EN7…	0	0	0	1.64093e+07	0	21469000	27759000	0	0	0	8;7;4;4;4	8;7;4;4;4	8;7;4;4;4	;;;;	5	8	8	8	0	5	6	0	0	0	0	5	6	0	0	0	0	5	6	0	0	0	19.4	19.4	19.4	55.455	499	499;493;261;276;284	0	60.366	0	11	16.2	0
tr|K7EMV3|K7EMV3_HUMANHistoneH3OS=HomosapiensGN=H3F3BPE=1SV=1;tr|K7EP01|K7EP01_HUMANHistoneH3.3OS=HomosapiensGN=H3F3BPE=1SV=1;tr|B4DEB1|B4DEB1_HUMANHistoneH3OS=HomosapiensGN=H3F3APE=1SV=1;tr|K7EK07|K7EK07_HUMANHistoneH3(Fragment)OS=HomosapiensGN=H3F3BPE=1SV=1;sp|Q6NXT2|H3C_HUMANHistoneH3.3COS=HomosapiensGN=H3F3CPE=1SV=3;tr|Q5TEC6|Q5TEC6_HUMANHistoneH3OS=HomosapiensGN=HIST2H3PS2PE=1SV=1;sp|Q71DI3|…	tr|K7EMV3|K7EMV3_HUMANHistoneH3OS=HomosapiensGN=H3F3BPE=1SV=1;tr|K7EP01|K7EP01_HUMANHistoneH3.3OS=HomosapiensGN=H3F3BPE=1SV=1;tr|B4DEB1|B4DEB1_HUMANHistoneH3OS=HomosapiensGN=H3F3APE=1SV=1;tr|K7EK07|K7EK07_HUMANHistoneH3(Fragment)OS=HomosapiensGN=H3F3BPE=1SV=1;sp|Q6NXT2|H3C_HUMANHistoneH3.3COS=HomosapiensGN=H3F3CPE=1SV=3;tr|Q5TEC6|Q5TEC6_HUMANHistoneH3OS=HomosapiensGN=HIST2H3PS2PE=1SV=1;sp|Q71DI3|…	0	0	0	15725000	0	23699000	23476000	0	0	0	2;2;2;2;2;2;2;2;2;2;2	2;2;2;2;2;2;2;2;2;2;2	2;2;2;2;2;2;2;2;2;2;2	;;;;;;;;;;	11	2	2	2	0	2	2	0	0	0	0	2	2	0	0	0	0	2	2	0	0	0	17.4	17.4	17.4	10.334	92	92;113;123;132;135;136;136;136;136;136;151	0	12.611	0	17.4	17.4	0
sp|P35580|MYH10_HUMANMyosin-10OS=HomosapiensGN=MYH10PE=1SV=3;tr|E7ERA5|E7ERA5_HUMANMyosin-10(Fragment)OS=HomosapiensGN=MYH10PE=1SV=5;tr|A0A0C4DFM8|A0A0C4DFM8_HUMANMyosin-14OS=HomosapiensGN=MYH14PE=1SV=1;tr|A1L2Z2|A1L2Z2_HUMANMYH14proteinOS=HomosapiensGN=MYH14PE=1SV=1	sp|P35580|MYH10_HUMANMyosin-10OS=HomosapiensGN=MYH10PE=1SV=3	0	0	0	1.56243e+07	0	34700000	12173000	0	0	0	26;2;1;1	26;2;1;1	19;2;0;0		4	26	26	19	0	23	9	0	0	0	0	23	9	0	0	0	0	17	5	0	0	0	16.9	16.9	13	229	1976	1976;188;508;638	0	250.13	0	14.7	6	0
sp|Q15029|U5S1_HUMAN116kDaU5smallnuclearribonucleoproteincomponentOS=HomosapiensGN=EFTUD2PE=1SV=1;tr|K7EP67|K7EP67_HUMAN116kDaU5smallnuclearribonucleoproteincomponent(Fragment)OS=HomosapiensGN=EFTUD2PE=1SV=1;tr|K7EJ74|K7EJ74_HUMAN116kDaU5smallnuclearribonucleoproteincomponent(Fragment)OS=HomosapiensGN=EFTUD2PE=1SV=1	sp|Q15029|U5S1_HUMAN116kDaU5smallnuclearribonucleoproteincomponentOS=HomosapiensGN=EFTUD2PE=1SV=1	0	0	0	15175000	0	19137000	26388000	0	0	0	13;6;3	13;6;3	13;6;3		3	13	13	13	0	5	10	2	2	0	0	5	10	2	2	0	0	5	10	2	2	0	16.9	16.9	16.9	109.43	972	972;223;134	0	93.612	0	5.6	12.9	2.7
sp|P02533|K1C14_HUMANKeratin,typeIcytoskeletal14OS=HomosapiensGN=KRT14PE=1SV=4;CON__P02533;sp|Q04695|K1C17_HUMANKeratin,typeIcytoskeletal17OS=HomosapiensGN=KRT17PE=1SV=2;CON__Q04695;CON__Q9QWL7;tr|F5GWP8|F5GWP8_HUMANKeratin,typeIcytoskeletal17OS=HomosapiensGN=KRT17PE=1SV=2;CON__Q6IFX2;sp|P19012|K1C15_HUMANKeratin,typeIcytoskeletal15OS=HomosapiensGN=KRT15PE=1SV=3;CON__P19012;CON__A2A4G1;tr|K7EPJ9|…	sp|P02533|K1C14_HUMANKeratin,typeIcytoskeletal14OS=HomosapiensGN=KRT14PE=1SV=4;CON__P02533;sp|Q04695|K1C17_HUMANKeratin,typeIcytoskeletal17OS=HomosapiensGN=KRT17PE=1SV=2;CON__Q04695;CON__Q9QWL7	0.994794	0	0	1.41517e+07	0	19772000	22683000	14078000	0	0	14;14;8;8;7;6;6;6;6;6;4;4;4;3;3;1;1;1	11;11;6;6;5;6;6;4;4;3;2;3;3;3;3;1;1;1	6;6;2;2;2;2;2;0;0;0;0;0;0;1;0;1;0;0	;;;;	18	14	11	6	1	8	9	7	0	0	1	6	7	5	0	0	0	3	3	1	0	0	28.4	24.6	16.3	51.561	472	472;472;432;432;433;349;452;456;456;456;231;469;474;93;291;95;181;220	0	100.59	1.9	15.9	17.6	13.3
tr|E7EMV2|E7EMV2_HUMANNeurofilamentmediumpolypeptideOS=HomosapiensGN=NEFMPE=1SV=1;tr|E7ESP9|E7ESP9_HUMANNeurofilamentmediumpolypeptideOS=HomosapiensGN=NEFMPE=1SV=1;sp|P07197|NFM_HUMANNeurofilamentmediumpolypeptideOS=HomosapiensGN=NEFMPE=1SV=3	tr|E7EMV2|E7EMV2_HUMANNeurofilamentmediumpolypeptideOS=HomosapiensGN=NEFMPE=1SV=1;tr|E7ESP9|E7ESP9_HUMANNeurofilamentmediumpolypeptideOS=HomosapiensGN=NEFMPE=1SV=1;sp|P07197|NFM_HUMANNeurofilamentmediumpolypeptideOS=HomosapiensGN=NEFMPE=1SV=3	0	0	0	13091000	0	15877000	23396000	0	0	0	11;11;11	10;10;10	9;9;9	;;	3	11	10	9	1	7	10	0	1	1	0	6	9	0	0	0	0	6	8	0	0	0	23.2	21.9	20.3	78.881	698	698;877;916	0	82.513	1.3	12.6	20.9	0
sp|O75688|PPM1B_HUMANProteinphosphatase1BOS=HomosapiensGN=PPM1BPE=1SV=1;tr|C9JIR6|C9JIR6_HUMANProteinphosphatase1B(Fragment)OS=HomosapiensGN=PPM1BPE=1SV=1;tr|B8ZZF0|B8ZZF0_HUMANProteinphosphatase1B(Fragment)OS=HomosapiensGN=PPM1BPE=1SV=2;sp|P35813|PPM1A_HUMANProteinphosphatase1AOS=HomosapiensGN=PPM1APE=1SV=1;tr|E9PL75|E9PL75_HUMANProteinphosphatase1A(Fragment)OS=HomosapiensGN=PPM1APE=1SV=5;tr|E9P…	sp|O75688|PPM1B_HUMANProteinphosphatase1BOS=HomosapiensGN=PPM1BPE=1SV=1;tr|C9JIR6|C9JIR6_HUMANProteinphosphatase1B(Fragment)OS=HomosapiensGN=PPM1BPE=1SV=1;tr|B8ZZF0|B8ZZF0_HUMANProteinphosphatase1B(Fragment)OS=HomosapiensGN=PPM1BPE=1SV=2	0	0	0	1.12773e+07	0	14152000	19680000	0	0	0	7;6;5;2;1;1;1	7;6;5;2;1;1;1	7;6;5;2;1;1;1	;;	7	7	7	7	0	6	5	0	0	0	0	6	5	0	0	0	0	6	5	0	0	0	17.7	17.7	17.7	52.642	479	479;378;303;382;129;148;187	0	51.893	0	15.7	13.6	0
tr|J3KN10|J3KN10_HUMANPhosphatidylinositol4-kinasealphaOS=HomosapiensGN=PI4KAPE=1SV=1;sp|P42356|PI4KA_HUMANPhosphatidylinositol4-kinasealphaOS=HomosapiensGN=PI4KAPE=1SV=3;sp|A4QPH2|PI4P2_HUMANPutativephosphatidylinositol4-kinasealpha-likeproteinP2OS=HomosapiensGN=PI4KAP2PE=5SV=3;sp|Q8N8J0|PI4P1_HUMANPutativeinactivephosphatidylinositol4-kinasealpha-likeproteinP1OS=HomosapiensGN=PI4KAP1PE=5SV=1;tr…	tr|J3KN10|J3KN10_HUMANPhosphatidylinositol4-kinasealphaOS=HomosapiensGN=PI4KAPE=1SV=1;sp|P42356|PI4KA_HUMANPhosphatidylinositol4-kinasealphaOS=HomosapiensGN=PI4KAPE=1SV=3	0	0	0	11220000	0	15136000	18524000	0	0	0	18;17;4;3;1;1	18;17;4;3;1;1	18;17;4;3;1;1	;	6	18	18	18	0	14	15	0	0	0	0	14	15	0	0	0	0	14	15	0	0	0	10.6	10.6	10.6	236.83	2102	2102;2044;592;262;87;435	0	117.66	0	8.4	8.8	0
sp|Q99417|MYCBP_HUMANC-Myc-bindingproteinOS=HomosapiensGN=MYCBPPE=1SV=3;tr|A0A087WV05|A0A087WV05_HUMANUncharacterizedproteinOS=HomosapiensPE=4SV=1;tr|A0A0D9SEI7|A0A0D9SEI7_HUMANC-Myc-bindingproteinOS=HomosapiensGN=MYCBPPE=4SV=1	sp|Q99417|MYCBP_HUMANC-Myc-bindingproteinOS=HomosapiensGN=MYCBPPE=1SV=3;tr|A0A087WV05|A0A087WV05_HUMANUncharacterizedproteinOS=HomosapiensPE=4SV=1	0	0	0	1.07167e+07	0	17315000	14835000	0	0	0	5;5;1	5;5;1	5;5;1	;	3	5	5	5	0	5	3	0	0	0	0	5	3	0	0	0	0	5	3	0	0	0	54.4	54.4	54.4	11.967	103	103;110;56	0	32.461	0	54.4	35.9	0
sp|P62258|1433E_HUMAN14-3-3proteinepsilonOS=HomosapiensGN=YWHAEPE=1SV=1;tr|K7EM20|K7EM20_HUMAN14-3-3proteinepsilon(Fragment)OS=HomosapiensGN=YWHAEPE=1SV=1;tr|B4DJF2|B4DJF2_HUMAN14-3-3proteinepsilonOS=HomosapiensGN=YWHAEPE=1SV=1;tr|I3L3T1|I3L3T1_HUMAN14-3-3proteinepsilonOS=HomosapiensGN=YWHAEPE=1SV=1;tr|K7EIT4|K7EIT4_HUMAN14-3-3proteinepsilon(Fragment)OS=HomosapiensGN=YWHAEPE=1SV=1;tr|I3L0W5|I3L0W…	sp|P62258|1433E_HUMAN14-3-3proteinepsilonOS=HomosapiensGN=YWHAEPE=1SV=1;tr|K7EM20|K7EM20_HUMAN14-3-3proteinepsilon(Fragment)OS=HomosapiensGN=YWHAEPE=1SV=1	0	0	0	1.04627e+07	31388000	0	0	0	0	0	7;4;3;3;2;1;1;1;1;1;1;1;1;1;1	7;4;3;3;2;1;1;1;1;1;1;1;1;1;1	6;3;3;3;2;1;0;0;0;0;0;0;0;0;0	;	15	7	7	6	7	0	0	0	0	0	7	0	0	0	0	0	6	0	0	0	0	0	33.3	33.3	29.4	29.174	255	255;115;94;107;109;38;125;130;168;245;245;246;246;246;248	0	67.145	33.3	0	0	0
tr|F8VSC5|F8VSC5_HUMANSCY1-likeprotein2(Fragment)OS=HomosapiensGN=SCYL2PE=1SV=1;sp|Q6P3W7|SCYL2_HUMANSCY1-likeprotein2OS=HomosapiensGN=SCYL2PE=1SV=1;tr|F8VPW3|F8VPW3_HUMANSCY1-likeprotein2(Fragment)OS=HomosapiensGN=SCYL2PE=1SV=1;tr|H0YIK6|H0YIK6_HUMANSCY1-likeprotein2(Fragment)OS=HomosapiensGN=SCYL2PE=1SV=1	tr|F8VSC5|F8VSC5_HUMANSCY1-likeprotein2(Fragment)OS=HomosapiensGN=SCYL2PE=1SV=1;sp|Q6P3W7|SCYL2_HUMANSCY1-likeprotein2OS=HomosapiensGN=SCYL2PE=1SV=1	0	0	0	1.04097e+07	0	15172000	16057000	0	0	0	7;7;1;1	7;7;1;1	7;7;1;1	;	4	7	7	7	0	5	6	0	0	0	0	5	6	0	0	0	0	5	6	0	0	0	14.4	14.4	14.4	77.053	681	681;929;76;115	0	47.388	0	10.1	11.7	0
tr|Q5HY54|Q5HY54_HUMANFilamin-AOS=HomosapiensGN=FLNAPE=1SV=1;tr|Q60FE5|Q60FE5_HUMANFilaminAOS=HomosapiensGN=FLNAPE=1SV=1;sp|P21333|FLNA_HUMANFilamin-AOS=HomosapiensGN=FLNAPE=1SV=4;tr|A0A087WWY3|A0A087WWY3_HUMANFilamin-AOS=HomosapiensGN=FLNAPE=1SV=1;tr|F8WE98|F8WE98_HUMANFilamin-A(Fragment)OS=HomosapiensGN=FLNAPE=1SV=2;tr|H0Y5F3|H0Y5F3_HUMANFilamin-A(Fragment)OS=HomosapiensGN=FLNAPE=1SV=1;tr|H0Y5C…	tr|Q5HY54|Q5HY54_HUMANFilamin-AOS=HomosapiensGN=FLNAPE=1SV=1;tr|Q60FE5|Q60FE5_HUMANFilaminAOS=HomosapiensGN=FLNAPE=1SV=1;sp|P21333|FLNA_HUMANFilamin-AOS=HomosapiensGN=FLNAPE=1SV=4;tr|A0A087WWY3|A0A087WWY3_HUMANFilamin-AOS=HomosapiensGN=FLNAPE=1SV=1	0	0	0	10075400	0	28454000	1772200	0	0	0	25;25;25;22;5;2;2;1;1;1	25;25;25;22;5;2;2;1;1;1	25;25;25;22;5;2;2;1;1;1	;;;	10	25	25	25	0	24	4	0	0	0	0	24	4	0	0	0	0	24	4	0	0	0	15.8	15.8	15.8	276.55	2607	2607;2620;2647;2315;604;232;281;90;2602;2725	0	154.22	0	15.2	1.9	0
sp|P62701|RS4X_HUMAN40SribosomalproteinS4,XisoformOS=HomosapiensGN=RPS4XPE=1SV=2;tr|A6NH36|A6NH36_HUMAN40SribosomalproteinS4,XisoformOS=HomosapiensGN=RPS4XPE=1SV=1;tr|C9JEH7|C9JEH7_HUMAN40SribosomalproteinS4,Yisoform1(Fragment)OS=HomosapiensGN=RPS4Y1PE=1SV=1;sp|P22090|RS4Y1_HUMAN40SribosomalproteinS4,Yisoform1OS=HomosapiensGN=RPS4Y1PE=1SV=2;sp|Q8TD47|RS4Y2_HUMAN40SribosomalproteinS4,Yisoform2OS=H…	sp|P62701|RS4X_HUMAN40SribosomalproteinS4,XisoformOS=HomosapiensGN=RPS4XPE=1SV=2	0	0	0	9.98067e+06	29942000	0	0	0	0	0	6;2;2;2;1	6;2;2;2;1	6;2;2;2;1		5	6	6	6	5	0	0	1	1	1	5	0	0	1	1	1	5	0	0	1	1	1	26.2	26.2	26.2	29.597	263	263;122;262;263;263	0	49.481	19.8	0	0	3.4
tr|A0A024QZP7|A0A024QZP7_HUMANCelldivisioncycle2,G1toSandG2toM,isoformCRA_aOS=HomosapiensGN=CDC2PE=1SV=1;sp|P06493|CDK1_HUMANCyclin-dependentkinase1OS=HomosapiensGN=CDK1PE=1SV=3;tr|A0A087WZZ9|A0A087WZZ9_HUMANCyclin-dependentkinase1OS=HomosapiensGN=CDK1PE=1SV=1;tr|E5RIU6|E5RIU6_HUMANCyclin-dependentkinase1(Fragment)OS=HomosapiensGN=CDK1PE=1SV=2;tr|F8VXD2|F8VXD2_HUMANCyclin-dependentkinase4(Fragmen…	tr|A0A024QZP7|A0A024QZP7_HUMANCelldivisioncycle2,G1toSandG2toM,isoformCRA_aOS=HomosapiensGN=CDC2PE=1SV=1;sp|P06493|CDK1_HUMANCyclin-dependentkinase1OS=HomosapiensGN=CDK1PE=1SV=3;tr|A0A087WZZ9|A0A087WZZ9_HUMANCyclin-dependentkinase1OS=HomosapiensGN=CDK1PE=1SV=1;tr|E5RIU6|E5RIU6_HUMANCyclin-dependentkinase1(Fragment)OS=HomosapiensGN=CDK1PE=1SV=2	0	0	0	9812000	29436000	0	0	0	0	0	8;8;7;6;1;1;1;1;1;1;1;1;1;1;1;1;1;1;1;1;1;1;1;1;1;1;1;1;1;1;1;1;1;1;1	8;8;7;6;1;1;1;1;1;1;1;1;1;1;1;1;1;1;1;1;1;1;1;1;1;1;1;1;1;1;1;1;1;1;1	8;8;7;6;1;1;1;1;1;1;1;1;1;1;1;1;1;1;1;1;1;1;1;1;1;1;1;1;1;1;1;1;1;1;1	;;;	35	8	8	8	6	1	0	1	1	0	6	1	0	1	1	0	6	1	0	1	1	0	26.9	26.9	26.9	34.081	297	297;297;224;189;132;165;170;186;201;203;208;213;238;260;292;298;303;305;324;326;340;346;372;393;418;435;448;469;470;472;496;523;1201;1490;1512	0	48.508	18.2	3.4	0	2.7
sp|P43243|MATR3_HUMANMatrin-3OS=HomosapiensGN=MATR3PE=1SV=2;tr|A8MXP9|A8MXP9_HUMANMatrin-3OS=HomosapiensGN=MATR3PE=1SV=1;tr|D6REM6|D6REM6_HUMANMatrin-3OS=HomosapiensGN=MATR3PE=1SV=1;tr|D6R991|D6R991_HUMANMatrin-3(Fragment)OS=HomosapiensGN=MATR3PE=1SV=1;tr|D6R8Z5|D6R8Z5_HUMANMatrin-3(Fragment)OS=HomosapiensGN=MATR3PE=1SV=1;tr|H0Y8T4|H0Y8T4_HUMANMatrin-3(Fragment)OS=HomosapiensGN=MATR3PE=1SV=1;tr|B…	sp|P43243|MATR3_HUMANMatrin-3OS=HomosapiensGN=MATR3PE=1SV=2;tr|A8MXP9|A8MXP9_HUMANMatrin-3OS=HomosapiensGN=MATR3PE=1SV=1;tr|D6REM6|D6REM6_HUMANMatrin-3OS=HomosapiensGN=MATR3PE=1SV=1;tr|D6R991|D6R991_HUMANMatrin-3(Fragment)OS=HomosapiensGN=MATR3PE=1SV=1	0.33138	0	0	9.69733e+06	0	17005000	12087000	3213500	0	0	13;13;12;11;3;3;3;2;2;2;2;2;2;1;1;1;1;1	13;13;12;11;3;3;3;2;2;2;2;2;2;1;1;1;1;1	13;13;12;11;3;3;3;2;2;2;2;2;2;1;1;1;1;1	;;;	18	13	13	13	0	10	9	2	1	1	0	10	9	2	1	1	0	10	9	2	1	1	19.7	19.7	19.7	94.622	847	847;895;794;433;107;334;509;47;78;87;99;100;283;81;86;109;125;172	0	152.16	0	16.4	14	3
sp|Q6P2Q9|PRP8_HUMANPre-mRNA-processing-splicingfactor8OS=HomosapiensGN=PRPF8PE=1SV=2;tr|I3L0J9|I3L0J9_HUMANPre-mRNA-processing-splicingfactor8(Fragment)OS=HomosapiensGN=PRPF8PE=1SV=5;tr|I3L1T8|I3L1T8_HUMANPre-mRNA-processing-splicingfactor8(Fragment)OS=HomosapiensGN=PRPF8PE=1SV=1;tr|I3L3Z8|I3L3Z8_HUMANPre-mRNA-processing-splicingfactor8(Fragment)OS=HomosapiensGN=PRPF8PE=1SV=1	sp|Q6P2Q9|PRP8_HUMANPre-mRNA-processing-splicingfactor8OS=HomosapiensGN=PRPF8PE=1SV=2	0	0	0	9.68967e+06	0	14333000	14736000	0	0	0	20;8;2;1	20;8;2;1	20;8;2;1		4	20	20	20	0	14	12	1	0	0	0	14	12	1	0	0	0	14	12	1	0	0	10.5	10.5	10.5	273.6	2335	2335;1013;116;250	0	165.2	0	7	7.2	0.3
sp|Q4VCS5|AMOT_HUMANAngiomotinOS=HomosapiensGN=AMOTPE=1SV=1;tr|A6NP16|A6NP16_HUMANAngiomotinOS=HomosapiensGN=AMOTPE=1SV=1;tr|E7ERM3|E7ERM3_HUMANAngiomotinOS=HomosapiensGN=AMOTPE=1SV=1;sp|Q8IY63|AMOL1_HUMANAngiomotin-likeprotein1OS=HomosapiensGN=AMOTL1PE=1SV=1	sp|Q4VCS5|AMOT_HUMANAngiomotinOS=HomosapiensGN=AMOTPE=1SV=1;tr|A6NP16|A6NP16_HUMANAngiomotinOS=HomosapiensGN=AMOTPE=1SV=1;tr|E7ERM3|E7ERM3_HUMANAngiomotinOS=HomosapiensGN=AMOTPE=1SV=1	0	0	0	9.13347e+06	0	21270000	6130400	0	0	0	10;7;7;1	10;7;7;1	10;7;7;1	;;	4	10	10	10	0	9	3	1	0	0	0	9	3	1	0	0	0	9	3	1	0	0	12.3	12.3	12.3	118.08	1084	1084;597;852;956	0	74.739	0	11.6	4.9	0.6
tr|X6R700|X6R700_HUMANChromatintargetofPRMT1proteinOS=HomosapiensGN=CHTOPPE=1SV=1;sp|Q9Y3Y2|CHTOP_HUMANChromatintargetofPRMT1proteinOS=HomosapiensGN=CHTOPPE=1SV=2;tr|A0A087X1B7|A0A087X1B7_HUMANChromatintargetofPRMT1proteinOS=HomosapiensGN=CHTOPPE=1SV=1;tr|Q5T7Y7|Q5T7Y7_HUMANChromatintargetofPRMT1proteinOS=HomosapiensGN=CHTOPPE=1SV=1	tr|X6R700|X6R700_HUMANChromatintargetofPRMT1proteinOS=HomosapiensGN=CHTOPPE=1SV=1;sp|Q9Y3Y2|CHTOP_HUMANChromatintargetofPRMT1proteinOS=HomosapiensGN=CHTOPPE=1SV=2;tr|A0A087X1B7|A0A087X1B7_HUMANChromatintargetofPRMT1proteinOS=HomosapiensGN=CHTOPPE=1SV=1	0	0	0	9045000	27135000	0	0	0	0	0	4;4;3;1	4;4;3;1	4;4;3;1	;;	4	4	4	4	3	0	0	0	1	2	3	0	0	0	1	2	3	0	0	0	1	2	23.3	23.3	23.3	23.661	223	223;248;76;101	0	31.601	16.1	0	0	0
tr|F8WD26|F8WD26_HUMANLIMdomainonlyprotein7OS=HomosapiensGN=LMO7PE=1SV=2;tr|J3KP06|J3KP06_HUMANLIMdomainonlyprotein7OS=HomosapiensGN=LMO7PE=1SV=2;sp|Q8WWI1|LMO7_HUMANLIMdomainonlyprotein7OS=HomosapiensGN=LMO7PE=1SV=3;tr|E9PMP7|E9PMP7_HUMANLIMdomainonlyprotein7(Fragment)OS=HomosapiensGN=LMO7PE=1SV=5;tr|E9PMS6|E9PMS6_HUMANLIMdomainonlyprotein7OS=HomosapiensGN=LMO7PE=1SV=1;tr|A0A0A0MTE2|A0A0A0MTE2_H…	tr|F8WD26|F8WD26_HUMANLIMdomainonlyprotein7OS=HomosapiensGN=LMO7PE=1SV=2;tr|J3KP06|J3KP06_HUMANLIMdomainonlyprotein7OS=HomosapiensGN=LMO7PE=1SV=2;sp|Q8WWI1|LMO7_HUMANLIMdomainonlyprotein7OS=HomosapiensGN=LMO7PE=1SV=3;tr|E9PMP7|E9PMP7_HUMANLIMdomainonlyprotein7(Fragment)OS=HomosapiensGN=LMO7PE=1SV=5;tr|E9PMS6|E9PMS6_HUMANLIMdomainonlyprotein7OS=HomosapiensGN=LMO7PE=1SV=1;tr|A0A0A0MTE2|A0A0A0MTE2_H…	0	0	0	8.80033e+06	0	15106000	11295000	0	0	0	14;14;14;13;13;12;12;11;5;3;1;1;1;1;1;1;1	14;14;14;13;13;12;12;11;5;3;1;1;1;1;1;1;1	14;14;14;13;13;12;12;11;5;3;1;1;1;1;1;1;1	;;;;;;;	17	14	14	14	0	10	7	0	0	0	0	10	7	0	0	0	0	10	7	0	0	0	13.1	13.1	13.1	186.18	1631	1631;1668;1683;1046;1275;1385;1398;1056;292;305;99;121;141;165;166;179;192	0	97.37	0	8.5	7.9	0
sp|Q92769|HDAC2_HUMANHistonedeacetylase2OS=HomosapiensGN=HDAC2PE=1SV=2	sp|Q92769|HDAC2_HUMANHistonedeacetylase2OS=HomosapiensGN=HDAC2PE=1SV=2	0	0	0	8.69767e+06	0	12026000	14067000	0	0	0	5	5	3		1	5	5	3	0	3	5	0	0	0	0	3	5	0	0	0	0	2	3	0	0	0	14.1	14.1	9	55.364	488	488	0	33.051	0	9.6	14.1	0
tr|Q5W015|Q5W015_HUMAN6-phosphofructo-2-kinase/fructose-2,6-bisphosphatase3OS=HomosapiensGN=PFKFB3PE=1SV=1;sp|Q16875|F263_HUMAN6-phosphofructo-2-kinase/fructose-2,6-bisphosphatase3OS=HomosapiensGN=PFKFB3PE=1SV=1;tr|Q5VX20|Q5VX20_HUMAN6-phosphofructo-2-kinase/fructose-2,6-bisphosphatase3OS=HomosapiensGN=PFKFB3PE=1SV=1;tr|F2Z2I2|F2Z2I2_HUMAN6-phosphofructo-2-kinase/fructose-2,6-bisphosphatase3OS=Ho…	tr|Q5W015|Q5W015_HUMAN6-phosphofructo-2-kinase/fructose-2,6-bisphosphatase3OS=HomosapiensGN=PFKFB3PE=1SV=1;sp|Q16875|F263_HUMAN6-phosphofructo-2-kinase/fructose-2,6-bisphosphatase3OS=HomosapiensGN=PFKFB3PE=1SV=1;tr|Q5VX20|Q5VX20_HUMAN6-phosphofructo-2-kinase/fructose-2,6-bisphosphatase3OS=HomosapiensGN=PFKFB3PE=1SV=1;tr|F2Z2I2|F2Z2I2_HUMAN6-phosphofructo-2-kinase/fructose-2,6-bisphosphatase3OS=Ho…	0	0	0	8.68467e+06	0	12375000	13679000	0	0	0	8;8;8;7;1;1;1	8;8;8;7;1;1;1	7;7;7;6;1;0;1	;;;	7	8	8	7	0	7	5	1	0	0	0	7	5	1	0	0	0	6	4	1	0	0	15.4	15.4	13.5	58.775	513	513;520;526;455;92;96;143	0	73.584	0	15.2	8.8	2.5
sp|Q9UH99|SUN2_HUMANSUNdomain-containingprotein2OS=HomosapiensGN=SUN2PE=1SV=3;tr|B0QY64|B0QY64_HUMANSUNdomain-containingprotein2(Fragment)OS=HomosapiensGN=SUN2PE=1SV=2;tr|B0QY68|B0QY68_HUMANSUNdomain-containingprotein2(Fragment)OS=HomosapiensGN=SUN2PE=1SV=5;tr|B0QY66|B0QY66_HUMANSUNdomain-containingprotein2(Fragment)OS=HomosapiensGN=SUN2PE=1SV=1;tr|H0Y686|H0Y686_HUMANSUNdomain-containingprotein2(…	sp|Q9UH99|SUN2_HUMANSUNdomain-containingprotein2OS=HomosapiensGN=SUN2PE=1SV=3	0	0	0	8.62367e+06	0	9735000	16136000	0	0	0	7;2;1;1;1;1;1;1	7;2;1;1;1;1;1;1	7;2;1;1;1;1;1;1		8	7	7	7	0	5	5	0	0	0	0	5	5	0	0	0	0	5	5	0	0	0	14.6	14.6	14.6	80.31	717	717;228;101;110;143;144;198;224	0	66.499	0	11.6	10.7	0
sp|Q8IX12|CCAR1_HUMANCelldivisioncycleandapoptosisregulatorprotein1OS=HomosapiensGN=CCAR1PE=1SV=2;tr|A0A0C4DGG8|A0A0C4DGG8_HUMANCelldivisioncycleandapoptosisregulatorprotein1(Fragment)OS=HomosapiensGN=CCAR1PE=1SV=1;tr|F5H2E6|F5H2E6_HUMANCelldivisioncycleandapoptosisregulatorprotein1(Fragment)OS=HomosapiensGN=CCAR1PE=1SV=1;tr|F5H1H2|F5H1H2_HUMANCelldivisioncycleandapoptosisregulatorprotein1(Fragme…	sp|Q8IX12|CCAR1_HUMANCelldivisioncycleandapoptosisregulatorprotein1OS=HomosapiensGN=CCAR1PE=1SV=2;tr|A0A0C4DGG8|A0A0C4DGG8_HUMANCelldivisioncycleandapoptosisregulatorprotein1(Fragment)OS=HomosapiensGN=CCAR1PE=1SV=1	9.17365	0	0	8137000	13805000	0	10606000	74646000	0	0	14;9;6;5;4;2;1	14;9;6;5;4;2;1	14;9;6;5;4;2;1	;	7	14	14	14	3	3	4	11	0	1	3	3	4	11	0	1	3	3	4	11	0	1	13.3	13.3	13.3	132.82	1150	1150;1043;772;646;568;290;171	0	92.577	2.5	3.4	4.3	9.8
sp|P81605|DCD_HUMANDermcidinOS=HomosapiensGN=DCDPE=1SV=2	sp|P81605|DCD_HUMANDermcidinOS=HomosapiensGN=DCDPE=1SV=2	0	0	0	8.07697e+06	0	15776000	8454900	0	0	0	2	2	2		1	2	2	2	0	2	2	0	0	0	0	2	2	0	0	0	0	2	2	0	0	0	12.7	12.7	12.7	11.284	110	110	0	14.235	0	12.7	12.7	0
sp|P23458|JAK1_HUMANTyrosine-proteinkinaseJAK1OS=HomosapiensGN=JAK1PE=1SV=2	sp|P23458|JAK1_HUMANTyrosine-proteinkinaseJAK1OS=HomosapiensGN=JAK1PE=1SV=2	0	0	0	8.03577e+06	0	16067000	8040300	0	0	0	12	12	12		1	12	12	12	0	11	5	0	0	0	0	11	5	0	0	0	0	11	5	0	0	0	13.2	13.2	13.2	133.28	1154	1154	0	79.356	0	12	5.5	0
rpl36_startcodon3;rpl36_startcodon2;rpl36_startcodon1	rpl36_startcodon3;rpl36_startcodon2;rpl36_startcodon1	2.98522	0	0	7916000	23748000	0	0	23631000	0	0	4;4;4	4;4;4	4;4;4	;;	3	4	4	4	4	0	0	2	0	0	4	0	0	2	0	0	4	0	0	2	0	0	38.9	38.9	38.9	14.131	131	131;139;150	0	33.133	38.9	0	0	16.8
sp|P25789|PSA4_HUMANProteasomesubunitalphatype-4OS=HomosapiensGN=PSMA4PE=1SV=1;tr|H0YMZ1|H0YMZ1_HUMANProteasomesubunitalphatype(Fragment)OS=HomosapiensGN=PSMA4PE=1SV=5;tr|H0YN18|H0YN18_HUMANProteasomesubunitalphatype-4OS=HomosapiensGN=PSMA4PE=1SV=1;tr|H0YL69|H0YL69_HUMANProteasomesubunitalphatype(Fragment)OS=HomosapiensGN=PSMA4PE=1SV=1;tr|H0YLS6|H0YLS6_HUMANProteasomesubunitalphatypeOS=Homosapien…	sp|P25789|PSA4_HUMANProteasomesubunitalphatype-4OS=HomosapiensGN=PSMA4PE=1SV=1;tr|H0YMZ1|H0YMZ1_HUMANProteasomesubunitalphatype(Fragment)OS=HomosapiensGN=PSMA4PE=1SV=5;tr|H0YN18|H0YN18_HUMANProteasomesubunitalphatype-4OS=HomosapiensGN=PSMA4PE=1SV=1;tr|H0YL69|H0YL69_HUMANProteasomesubunitalphatype(Fragment)OS=HomosapiensGN=PSMA4PE=1SV=1;tr|H0YLS6|H0YLS6_HUMANProteasomesubunitalphatypeOS=Homosapien…	0	0	0	7.49483e+06	0	15632000	6852500	0	0	0	4;3;3;3;2;2;2;2;1	4;3;3;3;2;2;2;2;1	4;3;3;3;2;2;2;2;1	;;;;;;;	9	4	4	4	0	4	3	0	1	1	0	4	3	0	1	1	0	4	3	0	1	1	13.8	13.8	13.8	29.483	261	261;221;230;236;125;174;183;209;182	0	24.402	0	13.8	10.3	0
tr|D6RHW1|D6RHW1_HUMANAdenylatekinaseisoenzyme6(Fragment)OS=HomosapiensGN=AK6PE=1SV=3;tr|D6RIY1|D6RIY1_HUMANAdenylatekinaseisoenzyme6(Fragment)OS=HomosapiensGN=AK6PE=1SV=3;tr|D6RGK3|D6RGK3_HUMANAdenylatekinaseisoenzyme6(Fragment)OS=HomosapiensGN=AK6PE=1SV=5;tr|D6RIV9|D6RIV9_HUMANAdenylatekinaseisoenzyme6(Fragment)OS=HomosapiensGN=AK6PE=1SV=3;tr|D6RIE8|D6RIE8_HUMANAdenylatekinaseisoenzyme6(Fragmen…	tr|D6RHW1|D6RHW1_HUMANAdenylatekinaseisoenzyme6(Fragment)OS=HomosapiensGN=AK6PE=1SV=3;tr|D6RIY1|D6RIY1_HUMANAdenylatekinaseisoenzyme6(Fragment)OS=HomosapiensGN=AK6PE=1SV=3;tr|D6RGK3|D6RGK3_HUMANAdenylatekinaseisoenzyme6(Fragment)OS=HomosapiensGN=AK6PE=1SV=5;tr|D6RIV9|D6RIV9_HUMANAdenylatekinaseisoenzyme6(Fragment)OS=HomosapiensGN=AK6PE=1SV=3;tr|D6RIE8|D6RIE8_HUMANAdenylatekinaseisoenzyme6(Fragmen…	0	0	0	7.29267e+06	21878000	0	0	0	0	0	2;2;2;2;2;2;2	2;2;2;2;2;2;2	2;2;2;2;2;2;2	;;;;;;	7	2	2	2	2	0	0	0	0	0	2	0	0	0	0	0	2	0	0	0	0	0	17.6	17.6	17.6	11.57	102	102;127;136;166;198;251;264	0	11.691	17.6	0	0	0
sp|P02538|K2C6A_HUMANKeratin,typeIIcytoskeletal6AOS=HomosapiensGN=KRT6APE=1SV=3;CON__P02538;sp|P48668|K2C6C_HUMANKeratin,typeIIcytoskeletal6COS=HomosapiensGN=KRT6CPE=1SV=3;CON__P48668;CON__P04259;sp|O95678|K2C75_HUMANKeratin,typeIIcytoskeletal75OS=HomosapiensGN=KRT75PE=1SV=2;CON__O95678	sp|P02538|K2C6A_HUMANKeratin,typeIIcytoskeletal6AOS=HomosapiensGN=KRT6APE=1SV=3;CON__P02538;sp|P48668|K2C6C_HUMANKeratin,typeIIcytoskeletal6COS=HomosapiensGN=KRT6CPE=1SV=3;CON__P48668;CON__P04259	1.22727	0	0	6.99683e+06	0	8461500	12529000	8587000	0	0	17;17;16;16;15;6;6	10;10;9;9;8;1;1	2;2;1;1;0;0;0	;;;;	7	17	10	2	2	9	8	10	1	1	0	3	5	7	0	0	0	0	0	2	0	0	28.7	20.4	4.8	60.044	564	564;564;564;564;564;551;551	0	90.012	3.4	14.5	16	19.9
sp|Q92600|RCD1_HUMANCelldifferentiationproteinRCD1homologOS=HomosapiensGN=RQCD1PE=1SV=1;tr|F8WBZ6|F8WBZ6_HUMANCelldifferentiationproteinRCD1homologOS=HomosapiensGN=RQCD1PE=1SV=1	sp|Q92600|RCD1_HUMANCelldifferentiationproteinRCD1homologOS=HomosapiensGN=RQCD1PE=1SV=1	0	0	0	6.86167e+06	20585000	0	0	0	0	0	5;1	5;1	5;1		2	5	5	5	5	0	0	0	0	0	5	0	0	0	0	0	5	0	0	0	0	0	15.7	15.7	15.7	33.631	299	299;75	0	30.907	15.7	0	0	0
sp|Q9UBV8|PEF1_HUMANPeflinOS=HomosapiensGN=PEF1PE=1SV=1	sp|Q9UBV8|PEF1_HUMANPeflinOS=HomosapiensGN=PEF1PE=1SV=1	0	0	0	6.44033e+06	19321000	0	0	0	0	0	2	2	2		1	2	2	2	2	0	0	0	1	0	2	0	0	0	1	0	2	0	0	0	1	0	6.7	6.7	6.7	30.381	284	284	0	12.709	6.7	0	0	0
tr|B4DUR8|B4DUR8_HUMANT-complexprotein1subunitgammaOS=HomosapiensGN=CCT3PE=1SV=1;sp|P49368|TCPG_HUMANT-complexprotein1subunitgammaOS=HomosapiensGN=CCT3PE=1SV=4	tr|B4DUR8|B4DUR8_HUMANT-complexprotein1subunitgammaOS=HomosapiensGN=CCT3PE=1SV=1;sp|P49368|TCPG_HUMANT-complexprotein1subunitgammaOS=HomosapiensGN=CCT3PE=1SV=4	0	0	0	6.29333e+06	0	18880000	0	0	0	0	3;3	3;3	3;3	;	2	3	3	3	0	2	1	0	0	0	0	2	1	0	0	0	0	2	1	0	0	0	7.2	7.2	7.2	55.674	500	500;545	0	17.739	0	5	2.2	0
sp|P05141|ADT2_HUMANADP/ATPtranslocase2OS=HomosapiensGN=SLC25A5PE=1SV=7;sp|P12236|ADT3_HUMANADP/ATPtranslocase3OS=HomosapiensGN=SLC25A6PE=1SV=4;sp|P12235|ADT1_HUMANADP/ATPtranslocase1OS=HomosapiensGN=SLC25A4PE=1SV=4;tr|V9GYG0|V9GYG0_HUMANADP/ATPtranslocase1OS=HomosapiensGN=SLC25A4PE=1SV=1;sp|Q9H0C2|ADT4_HUMANADP/ATPtranslocase4OS=HomosapiensGN=SLC25A31PE=2SV=1	sp|P05141|ADT2_HUMANADP/ATPtranslocase2OS=HomosapiensGN=SLC25A5PE=1SV=7;sp|P12236|ADT3_HUMANADP/ATPtranslocase3OS=HomosapiensGN=SLC25A6PE=1SV=4;sp|P12235|ADT1_HUMANADP/ATPtranslocase1OS=HomosapiensGN=SLC25A4PE=1SV=4	0	0	0	6.18867e+06	18566000	0	0	0	0	0	5;3;3;2;1	5;3;3;2;1	5;3;3;2;1	;;	5	5	5	5	4	1	1	0	2	1	4	1	1	0	2	1	4	1	1	0	2	1	18.1	18.1	18.1	32.852	298	298;298;298;208;315	0	31.85	14.4	3.4	3.4	0
tr|E9PK91|E9PK91_HUMANBcl-2-associatedtranscriptionfactor1OS=HomosapiensGN=BCLAF1PE=1SV=1;tr|H0YF63|H0YF63_HUMANBcl-2-associatedtranscriptionfactor1(Fragment)OS=HomosapiensGN=BCLAF1PE=1SV=1	tr|E9PK91|E9PK91_HUMANBcl-2-associatedtranscriptionfactor1OS=HomosapiensGN=BCLAF1PE=1SV=1	0	0	0	6005000	0	0	18015000	0	0	0	28;3	1;1	1;1		2	28	1	1	7	18	22	10	4	6	0	0	1	0	0	0	0	0	1	0	0	0	28.7	1.8	1.8	100.4	871	871;126	0.0020367	6.3736	9.9	17	24.5	12.7
sp|Q86V81|THOC4_HUMANTHOcomplexsubunit4OS=HomosapiensGN=ALYREFPE=1SV=3;tr|E9PB61|E9PB61_HUMANTHOcomplexsubunit4OS=HomosapiensGN=ALYREFPE=1SV=1	sp|Q86V81|THOC4_HUMANTHOcomplexsubunit4OS=HomosapiensGN=ALYREFPE=1SV=3;tr|E9PB61|E9PB61_HUMANTHOcomplexsubunit4OS=HomosapiensGN=ALYREFPE=1SV=1	0	0	0	5777000	17331000	0	0	0	0	0	4;4	4;4	4;4	;	2	4	4	4	4	0	1	0	2	2	4	0	1	0	2	2	4	0	1	0	2	2	23.3	23.3	23.3	26.888	257	257;264	0	28.427	23.3	0	4.3	0
tr|F8VPF3|F8VPF3_HUMANMyosinlightpolypeptide6(Fragment)OS=HomosapiensGN=MYL6PE=1SV=1;tr|F8W1R7|F8W1R7_HUMANMyosinlightpolypeptide6OS=HomosapiensGN=MYL6PE=1SV=1;sp|P60660|MYL6_HUMANMyosinlightpolypeptide6OS=HomosapiensGN=MYL6PE=1SV=2;tr|J3KND3|J3KND3_HUMANMyosinlightpolypeptide6OS=HomosapiensGN=MYL6PE=1SV=1;tr|G8JLA2|G8JLA2_HUMANMyosinlightpolypeptide6OS=HomosapiensGN=MYL6PE=1SV=1;tr|G3V1V0|G3V1V0…	tr|F8VPF3|F8VPF3_HUMANMyosinlightpolypeptide6(Fragment)OS=HomosapiensGN=MYL6PE=1SV=1;tr|F8W1R7|F8W1R7_HUMANMyosinlightpolypeptide6OS=HomosapiensGN=MYL6PE=1SV=1;sp|P60660|MYL6_HUMANMyosinlightpolypeptide6OS=HomosapiensGN=MYL6PE=1SV=2;tr|J3KND3|J3KND3_HUMANMyosinlightpolypeptide6OS=HomosapiensGN=MYL6PE=1SV=1;tr|G8JLA2|G8JLA2_HUMANMyosinlightpolypeptide6OS=HomosapiensGN=MYL6PE=1SV=1;tr|G3V1V0|G3V1V0…	0	0	0	5.73443e+06	0	10470000	6733300	0	0	0	3;3;3;3;3;3;3;2;2;2;1;1;1;1	3;3;3;3;3;3;3;2;2;2;1;1;1;1	3;3;3;3;3;3;3;2;2;2;1;1;1;1	;;;;;;;;;	14	3	3	3	0	3	2	0	0	0	0	3	2	0	0	0	0	3	2	0	0	0	29.2	29.2	29.2	14.436	130	130;145;151;152;152;161;238;103;115;196;47;83;175;208	0	23.113	0	29.2	22.3	0
tr|E9PBF6|E9PBF6_HUMANLamin-B1OS=HomosapiensGN=LMNB1PE=1SV=1;sp|P20700|LMNB1_HUMANLamin-B1OS=HomosapiensGN=LMNB1PE=1SV=2;tr|A0A0D9SFE5|A0A0D9SFE5_HUMANLaminB1,isoformCRA_aOS=HomosapiensGN=LMNB1PE=1SV=1;tr|A0A0D9SFY5|A0A0D9SFY5_HUMANLamin-B1(Fragment)OS=HomosapiensGN=LMNB1PE=1SV=1	tr|E9PBF6|E9PBF6_HUMANLamin-B1OS=HomosapiensGN=LMNB1PE=1SV=1;sp|P20700|LMNB1_HUMANLamin-B1OS=HomosapiensGN=LMNB1PE=1SV=2;tr|A0A0D9SFE5|A0A0D9SFE5_HUMANLaminB1,isoformCRA_aOS=HomosapiensGN=LMNB1PE=1SV=1	0	0	0	5.47053e+06	0	11218000	5193600	0	0	0	6;6;4;2	6;6;4;2	6;6;4;2	;;	4	6	6	6	0	5	5	0	0	0	0	5	5	0	0	0	0	5	5	0	0	0	17.1	17.1	17.1	44.643	387	387;586;329;166	0	39.548	0	14.2	14.5	0
sp|Q9BQE3|TBA1C_HUMANTubulinalpha-1CchainOS=HomosapiensGN=TUBA1CPE=1SV=1;sp|P68363|TBA1B_HUMANTubulinalpha-1BchainOS=HomosapiensGN=TUBA1BPE=1SV=1;tr|F5H5D3|F5H5D3_HUMANTubulinalpha-1CchainOS=HomosapiensGN=TUBA1CPE=1SV=1;tr|F8VVB9|F8VVB9_HUMANTubulinalpha-1Bchain(Fragment)OS=HomosapiensGN=TUBA1BPE=1SV=5;sp|Q71U36|TBA1A_HUMANTubulinalpha-1AchainOS=HomosapiensGN=TUBA1APE=1SV=1;sp|Q6PEY2|TBA3E_HUMANT…	sp|Q9BQE3|TBA1C_HUMANTubulinalpha-1CchainOS=HomosapiensGN=TUBA1CPE=1SV=1;sp|P68363|TBA1B_HUMANTubulinalpha-1BchainOS=HomosapiensGN=TUBA1BPE=1SV=1;tr|F5H5D3|F5H5D3_HUMANTubulinalpha-1CchainOS=HomosapiensGN=TUBA1CPE=1SV=1;tr|F8VVB9|F8VVB9_HUMANTubulinalpha-1Bchain(Fragment)OS=HomosapiensGN=TUBA1BPE=1SV=5;sp|Q71U36|TBA1A_HUMANTubulinalpha-1AchainOS=HomosapiensGN=TUBA1APE=1SV=1;sp|Q6PEY2|TBA3E_HUMANT…	0	0	0	5.40313e+06	0	7561900	8647500	0	0	0	8;8;8;7;7;5;5;4;4;4;3;3;2;2;2;1;1;1	8;8;8;7;7;5;5;4;4;4;3;3;2;2;2;1;1;1	5;5;5;4;5;3;3;1;3;1;3;3;2;2;2;1;1;0	;;;;;;;;;	18	8	8	5	2	4	5	1	2	1	2	4	5	1	2	1	1	3	4	0	1	1	26.5	26.5	15.6	49.895	449	449;451;519;247;451;450;450;156;219;448;112;130;49;75;81;26;231;241	0	65.76	5.1	14.7	18.3	3.1
sp|P13647|K2C5_HUMANKeratin,typeIIcytoskeletal5OS=HomosapiensGN=KRT5PE=1SV=3;CON__P13647;tr|F8W0C6|F8W0C6_HUMANKeratin,typeIIcytoskeletal5(Fragment)OS=HomosapiensGN=KRT5PE=1SV=5;tr|F8VV57|F8VV57_HUMANKeratin,typeIIcytoskeletal5(Fragment)OS=HomosapiensGN=KRT5PE=1SV=1;tr|H0YIN9|H0YIN9_HUMANKeratin,typeIIcytoskeletal5(Fragment)OS=HomosapiensGN=KRT5PE=1SV=1;tr|H0YI76|H0YI76_HUMANKeratin,typeIIcytoske…	sp|P13647|K2C5_HUMANKeratin,typeIIcytoskeletal5OS=HomosapiensGN=KRT5PE=1SV=3;CON__P13647;tr|F8W0C6|F8W0C6_HUMANKeratin,typeIIcytoskeletal5(Fragment)OS=HomosapiensGN=KRT5PE=1SV=5	0.971273	0	0	5.37593e+06	0	6506600	9621200	5221500	0	0	17;17;10;3;3;3;1	7;7;1;3;1;2;1	3;3;0;1;0;2;0	;;	7	17	7	3	2	10	9	9	1	1	0	3	5	3	0	0	0	1	1	2	0	0	26.3	12.7	5.1	62.378	590	590;590;179;132;196;201;147	0	47.256	3.2	16.3	17.5	16.6
sp|Q9Y265|RUVB1_HUMANRuvB-like1OS=HomosapiensGN=RUVBL1PE=1SV=1;tr|E7ETR0|E7ETR0_HUMANRuvB-like1OS=HomosapiensGN=RUVBL1PE=1SV=1;tr|J3QLR1|J3QLR1_HUMANRuvB-like1(Fragment)OS=HomosapiensGN=RUVBL1PE=1SV=1;tr|H7C4I3|H7C4I3_HUMANRuvB-like1(Fragment)OS=HomosapiensGN=RUVBL1PE=1SV=1;tr|H7C4G5|H7C4G5_HUMANRuvB-like1(Fragment)OS=HomosapiensGN=RUVBL1PE=1SV=1	sp|Q9Y265|RUVB1_HUMANRuvB-like1OS=HomosapiensGN=RUVBL1PE=1SV=1;tr|E7ETR0|E7ETR0_HUMANRuvB-like1OS=HomosapiensGN=RUVBL1PE=1SV=1	0	0	0	5348800	0	8910200	7136200	0	0	0	6;5;1;1;1	6;5;1;1;1	6;5;1;1;1	;	5	6	6	6	0	4	6	0	0	0	0	4	6	0	0	0	0	4	6	0	0	0	16.2	16.2	16.2	50.227	456	456;315;131;222;267	0	37.163	0	10.3	16.2	0
sp|Q15393|SF3B3_HUMANSplicingfactor3Bsubunit3OS=HomosapiensGN=SF3B3PE=1SV=4;tr|J3QRB2|J3QRB2_HUMANSplicingfactor3Bsubunit3(Fragment)OS=HomosapiensGN=SF3B3PE=1SV=1;tr|J3QL37|J3QL37_HUMANSplicingfactor3Bsubunit3(Fragment)OS=HomosapiensGN=SF3B3PE=1SV=5	sp|Q15393|SF3B3_HUMANSplicingfactor3Bsubunit3OS=HomosapiensGN=SF3B3PE=1SV=4	0	0	0	5.33713e+06	0	6468800	9542600	0	0	0	8;1;1	8;1;1	8;1;1		3	8	8	8	0	6	7	0	0	0	0	6	7	0	0	0	0	6	7	0	0	0	7.9	7.9	7.9	135.58	1217	1217;31;58	0	53.552	0	6.6	6.9	0
sp|P61326|MGN_HUMANProteinmagonashihomologOS=HomosapiensGN=MAGOHPE=1SV=1;tr|F5H6P7|F5H6P7_HUMANProteinmagonashihomolog2OS=HomosapiensGN=MAGOHBPE=4SV=1;sp|Q96A72|MGN2_HUMANProteinmagonashihomolog2OS=HomosapiensGN=MAGOHBPE=1SV=1;tr|F5H3U9|F5H3U9_HUMANProteinmagonashihomolog2OS=HomosapiensGN=MAGOHBPE=4SV=1;tr|F5H6N1|F5H6N1_HUMANProteinmagonashihomolog2OS=HomosapiensGN=MAGOHBPE=1SV=1	sp|P61326|MGN_HUMANProteinmagonashihomologOS=HomosapiensGN=MAGOHPE=1SV=1;tr|F5H6P7|F5H6P7_HUMANProteinmagonashihomolog2OS=HomosapiensGN=MAGOHBPE=4SV=1;sp|Q96A72|MGN2_HUMANProteinmagonashihomolog2OS=HomosapiensGN=MAGOHBPE=1SV=1	0	0	0	5.32497e+06	0	6626200	9348700	0	0	0	4;3;3;1;1	4;3;3;1;1	4;3;3;1;1	;;	5	4	4	4	0	3	4	0	0	0	0	3	4	0	0	0	0	3	4	0	0	0	22.6	22.6	22.6	17.163	146	146;102;148;44;90	0	27.283	0	17.1	22.6	0
sp|Q96FJ2|DYL2_HUMANDyneinlightchain2,cytoplasmicOS=HomosapiensGN=DYNLL2PE=1SV=1;sp|P63167|DYL1_HUMANDyneinlightchain1,cytoplasmicOS=HomosapiensGN=DYNLL1PE=1SV=1	sp|Q96FJ2|DYL2_HUMANDyneinlightchain2,cytoplasmicOS=HomosapiensGN=DYNLL2PE=1SV=1;sp|P63167|DYL1_HUMANDyneinlightchain1,cytoplasmicOS=HomosapiensGN=DYNLL1PE=1SV=1	4.30257	0	0	5298000	15894000	0	0	22795000	0	0	1;1	1;1	1;1	;	2	1	1	1	1	0	0	1	0	0	1	0	0	1	0	0	1	0	0	1	0	0	12.4	12.4	12.4	10.35	89	89;89	0	7.4984	12.4	0	0	12.4
sp|P23246|SFPQ_HUMANSplicingfactor,proline-andglutamine-richOS=HomosapiensGN=SFPQPE=1SV=2	sp|P23246|SFPQ_HUMANSplicingfactor,proline-andglutamine-richOS=HomosapiensGN=SFPQPE=1SV=2	0	0	0	4904100	0	8036600	6675700	0	0	0	6	6	5		1	6	6	5	1	5	4	2	0	0	1	5	4	2	0	0	1	4	3	2	0	0	10.2	10.2	9.1	76.149	707	707	0	37.398	2.1	9.2	6.5	3.1
tr|E7ESY4|E7ESY4_HUMANMetastasis-associatedproteinMTA1OS=HomosapiensGN=MTA1PE=1SV=1;sp|Q13330|MTA1_HUMANMetastasis-associatedproteinMTA1OS=HomosapiensGN=MTA1PE=1SV=2;tr|H0Y4T7|H0Y4T7_HUMANMetastasis-associatedproteinMTA1(Fragment)OS=HomosapiensGN=MTA1PE=1SV=1;tr|F8VSM3|F8VSM3_HUMANMetastasis-associatedproteinMTA1(Fragment)OS=HomosapiensGN=MTA1PE=1SV=1;tr|F8W9Y9|F8W9Y9_HUMANMetastasis-associatedpr…	tr|E7ESY4|E7ESY4_HUMANMetastasis-associatedproteinMTA1OS=HomosapiensGN=MTA1PE=1SV=1;sp|Q13330|MTA1_HUMANMetastasis-associatedproteinMTA1OS=HomosapiensGN=MTA1PE=1SV=2;tr|H0Y4T7|H0Y4T7_HUMANMetastasis-associatedproteinMTA1(Fragment)OS=HomosapiensGN=MTA1PE=1SV=1	0	0	0	4.90103e+06	0	5460200	9242900	0	0	0	9;9;6;3;3;3;3;3;3;2;1;1;1	9;9;6;3;3;3;3;3;3;2;1;1;1	8;8;5;2;3;2;2;2;2;1;1;1;1	;;	13	9	9	8	0	5	7	0	0	0	0	5	7	0	0	0	0	4	7	0	0	0	17.8	17.8	16.4	79.372	703	703;715;511;228;255;392;514;590;594;537;46;57;91	0	55.959	0	8.7	14.8	0
sp|P49792|RBP2_HUMANE3SUMO-proteinligaseRanBP2OS=HomosapiensGN=RANBP2PE=1SV=2	sp|P49792|RBP2_HUMANE3SUMO-proteinligaseRanBP2OS=HomosapiensGN=RANBP2PE=1SV=2	0	0	0	4.62083e+06	0	6958400	6904100	0	0	0	12	12	6		1	12	12	6	0	9	7	0	0	0	0	9	7	0	0	0	0	3	4	0	0	0	4.3	4.3	2.3	358.2	3224	3224	0	73.735	0	3.1	2.5	0
sp|P35579|MYH9_HUMANMyosin-9OS=HomosapiensGN=MYH9PE=1SV=4;tr|Q5BKV1|Q5BKV1_HUMANMYH9proteinOS=HomosapiensGN=MYH9PE=1SV=1	sp|P35579|MYH9_HUMANMyosin-9OS=HomosapiensGN=MYH9PE=1SV=4	0	0	0	4601000	0	8835400	4967600	0	0	0	14;1	10;1	9;1		2	14	10	9	0	14	6	0	0	0	0	10	4	0	0	0	0	9	3	0	0	0	9.9	7.4	6.6	226.53	1960	1960;218	0	149.95	0	9.9	4.2	0
CON__P02662	CON__P02662	0	0	0	4334200	0	5401500	7601100	0	0	0	2	2	2		1	2	2	2	0	2	2	0	0	0	0	2	2	0	0	0	0	2	2	0	0	0	11.1	11.1	11.1	22.975	199	199	0	14.68	0	11.1	11.1	0
sp|Q9P219|DAPLE_HUMANProteinDapleOS=HomosapiensGN=CCDC88CPE=1SV=3	sp|Q9P219|DAPLE_HUMANProteinDapleOS=HomosapiensGN=CCDC88CPE=1SV=3	0	0	0	4.23407e+06	0	7289200	5413000	0	0	0	9	9	9		1	9	9	9	0	7	5	0	0	0	0	7	5	0	0	0	0	7	5	0	0	0	5.1	5.1	5.1	228.23	2028	2028	0	53.79	0	3.6	3.2	0
tr|A0A0A0MSI0|A0A0A0MSI0_HUMANPeroxiredoxin-1(Fragment)OS=HomosapiensGN=PRDX1PE=1SV=1;sp|Q06830|PRDX1_HUMANPeroxiredoxin-1OS=HomosapiensGN=PRDX1PE=1SV=1;tr|A0A0A0MRQ5|A0A0A0MRQ5_HUMANPeroxiredoxin-1OS=HomosapiensGN=PRDX1PE=1SV=1	tr|A0A0A0MSI0|A0A0A0MSI0_HUMANPeroxiredoxin-1(Fragment)OS=HomosapiensGN=PRDX1PE=1SV=1;sp|Q06830|PRDX1_HUMANPeroxiredoxin-1OS=HomosapiensGN=PRDX1PE=1SV=1;tr|A0A0A0MRQ5|A0A0A0MRQ5_HUMANPeroxiredoxin-1OS=HomosapiensGN=PRDX1PE=1SV=1	0	0	0	4103200	0	7280800	5028800	0	0	0	5;5;3	5;5;3	4;4;2	;;	3	5	5	4	1	3	3	3	0	0	1	3	3	3	0	0	0	2	2	2	0	0	28.1	28.1	21.6	18.976	171	171;199;97	0	32.974	6.4	17.5	17.5	17
sp|Q09028|RBBP4_HUMANHistone-bindingproteinRBBP4OS=HomosapiensGN=RBBP4PE=1SV=3;tr|H0YEU5|H0YEU5_HUMANHistone-bindingproteinRBBP4(Fragment)OS=HomosapiensGN=RBBP4PE=1SV=1;tr|Q5JP02|Q5JP02_HUMANHistone-bindingproteinRBBP7(Fragment)OS=HomosapiensGN=RBBP7PE=1SV=1;tr|H0YCT5|H0YCT5_HUMANHistone-bindingproteinRBBP4(Fragment)OS=HomosapiensGN=RBBP4PE=1SV=1;tr|H0YF10|H0YF10_HUMANHistone-bindingproteinRBBP4(…	sp|Q09028|RBBP4_HUMANHistone-bindingproteinRBBP4OS=HomosapiensGN=RBBP4PE=1SV=3;tr|H0YEU5|H0YEU5_HUMANHistone-bindingproteinRBBP4(Fragment)OS=HomosapiensGN=RBBP4PE=1SV=1;tr|Q5JP02|Q5JP02_HUMANHistone-bindingproteinRBBP7(Fragment)OS=HomosapiensGN=RBBP7PE=1SV=1;tr|H0YCT5|H0YCT5_HUMANHistone-bindingproteinRBBP4(Fragment)OS=HomosapiensGN=RBBP4PE=1SV=1;tr|H0YF10|H0YF10_HUMANHistone-bindingproteinRBBP4(…	1.06027	0	0	4.08133e+06	12244000	0	0	4327300	0	0	4;2;2;2;2;2;2;2;1;1;1;1;1	4;2;2;2;2;2;2;2;1;1;1;1;1	4;2;2;2;2;2;2;2;1;1;1;1;1	;;;;;;;	13	4	4	4	3	1	1	2	0	0	3	1	1	2	0	0	3	1	1	2	0	0	9.9	9.9	9.9	47.655	425	425;167;175;180;207;262;416;425;62;85;87;87;104	0	24.303	6.6	3.3	3.3	4.7
sp|P07196|NFL_HUMANNeurofilamentlightpolypeptideOS=HomosapiensGN=NEFLPE=1SV=3;tr|A0A087X0W2|A0A087X0W2_HUMANNeurofilamentlightpolypeptideOS=HomosapiensGN=NEFLPE=1SV=1	sp|P07196|NFL_HUMANNeurofilamentlightpolypeptideOS=HomosapiensGN=NEFLPE=1SV=3;tr|A0A087X0W2|A0A087X0W2_HUMANNeurofilamentlightpolypeptideOS=HomosapiensGN=NEFLPE=1SV=1	0	0	0	3.93257e+06	0	5660400	6137300	0	0	0	8;4	6;4	6;4	;	2	8	6	6	1	5	6	0	1	1	0	4	4	0	0	0	0	4	4	0	0	0	18.4	14.7	14.7	61.516	543	543;284	0	46.679	1.7	12	14.9	0
sp|P11498|PYC_HUMANPyruvatecarboxylase,mitochondrialOS=HomosapiensGN=PCPE=1SV=2;tr|E9PRE7|E9PRE7_HUMANPyruvatecarboxylase,mitochondrialOS=HomosapiensGN=PCPE=1SV=1	sp|P11498|PYC_HUMANPyruvatecarboxylase,mitochondrialOS=HomosapiensGN=PCPE=1SV=2;tr|E9PRE7|E9PRE7_HUMANPyruvatecarboxylase,mitochondrialOS=HomosapiensGN=PCPE=1SV=1	0	0	0	3.79033e+06	11371000	0	0	0	0	0	2;1	2;1	2;1	;	2	2	2	2	2	0	0	0	0	0	2	0	0	0	0	0	2	0	0	0	0	0	5.7	5.7	5.7	129.63	1178	1178;489	0	33.986	5.7	0	0	0
sp|Q16514|TAF12_HUMANTranscriptioninitiationfactorTFIIDsubunit12OS=HomosapiensGN=TAF12PE=1SV=1	sp|Q16514|TAF12_HUMANTranscriptioninitiationfactorTFIIDsubunit12OS=HomosapiensGN=TAF12PE=1SV=1	0	0	0	3.74833e+06	0	11245000	0	0	0	0	3	3	3		1	3	3	3	0	2	0	1	0	0	0	2	0	1	0	0	0	2	0	1	0	0	18	18	18	17.924	161	161	0	18.8	0	11.2	0	6.8
tr|A0A0D9SFB3|A0A0D9SFB3_HUMANATP-dependentRNAhelicaseDDX3XOS=HomosapiensGN=DDX3XPE=1SV=1;tr|A0A0D9SG12|A0A0D9SG12_HUMANATP-dependentRNAhelicaseDDX3XOS=HomosapiensGN=DDX3XPE=1SV=1;sp|O00571|DDX3X_HUMANATP-dependentRNAhelicaseDDX3XOS=HomosapiensGN=DDX3XPE=1SV=3;tr|A0A0D9SF53|A0A0D9SF53_HUMANATP-dependentRNAhelicaseDDX3XOS=HomosapiensGN=DDX3XPE=1SV=1;sp|O15523|DDX3Y_HUMANATP-dependentRNAhelicaseDDX…	tr|A0A0D9SFB3|A0A0D9SFB3_HUMANATP-dependentRNAhelicaseDDX3XOS=HomosapiensGN=DDX3XPE=1SV=1;tr|A0A0D9SG12|A0A0D9SG12_HUMANATP-dependentRNAhelicaseDDX3XOS=HomosapiensGN=DDX3XPE=1SV=1;sp|O00571|DDX3X_HUMANATP-dependentRNAhelicaseDDX3XOS=HomosapiensGN=DDX3XPE=1SV=3;tr|A0A0D9SF53|A0A0D9SF53_HUMANATP-dependentRNAhelicaseDDX3XOS=HomosapiensGN=DDX3XPE=1SV=1;sp|O15523|DDX3Y_HUMANATP-dependentRNAhelicaseDDX…	0	0	0	3.71863e+06	0	5706000	5449900	0	0	0	7;7;7;7;5;1	6;6;6;6;4;1	6;6;6;6;4;1	;;;;	6	7	6	6	0	6	3	1	0	2	0	5	3	1	0	1	0	5	3	1	0	1	12	10.3	10.3	70.839	640	640;647;662;733;660;138	0	39.436	0	10.2	5.3	1.9
sp|Q99880|H2B1L_HUMANHistoneH2Btype1-LOS=HomosapiensGN=HIST1H2BLPE=1SV=3;sp|Q99879|H2B1M_HUMANHistoneH2Btype1-MOS=HomosapiensGN=HIST1H2BMPE=1SV=3;sp|Q99877|H2B1N_HUMANHistoneH2Btype1-NOS=HomosapiensGN=HIST1H2BNPE=1SV=3;sp|Q93079|H2B1H_HUMANHistoneH2Btype1-HOS=HomosapiensGN=HIST1H2BHPE=1SV=3;sp|Q5QNW6|H2B2F_HUMANHistoneH2Btype2-FOS=HomosapiensGN=HIST2H2BFPE=1SV=3;sp|P62807|H2B1C_HUMANHistoneH2Btyp…	sp|Q99880|H2B1L_HUMANHistoneH2Btype1-LOS=HomosapiensGN=HIST1H2BLPE=1SV=3;sp|Q99879|H2B1M_HUMANHistoneH2Btype1-MOS=HomosapiensGN=HIST1H2BMPE=1SV=3;sp|Q99877|H2B1N_HUMANHistoneH2Btype1-NOS=HomosapiensGN=HIST1H2BNPE=1SV=3;sp|Q93079|H2B1H_HUMANHistoneH2Btype1-HOS=HomosapiensGN=HIST1H2BHPE=1SV=3;sp|Q5QNW6|H2B2F_HUMANHistoneH2Btype2-FOS=HomosapiensGN=HIST2H2BFPE=1SV=3;sp|P62807|H2B1C_HUMANHistoneH2Btyp…	0	0	0	3.58733e+06	0	10762000	0	0	0	0	5;5;5;5;5;5;5;5;5;5;4;4;4;4;3;3	5;5;5;5;5;5;5;5;5;5;4;4;4;4;3;3	5;5;5;5;5;5;5;5;5;5;4;4;4;4;3;3	;;;;;;;;;;;;;;;	16	5	5	5	0	4	2	1	0	0	0	4	2	1	0	0	0	4	2	1	0	0	41.3	41.3	41.3	13.952	126	126;126;126;126;126;126;126;126;126;166;126;126;126;126;126;127	0	32.809	0	34.1	19	7.1
sp|P11021|GRP78_HUMAN78kDaglucose-regulatedproteinOS=HomosapiensGN=HSPA5PE=1SV=2	sp|P11021|GRP78_HUMAN78kDaglucose-regulatedproteinOS=HomosapiensGN=HSPA5PE=1SV=2	0	0	0	3.54833e+06	0	4377300	6267700	0	0	0	9	8	8		1	9	8	8	0	3	9	1	0	0	0	3	8	0	0	0	0	3	8	0	0	0	17.6	17.6	17.6	72.332	654	654	0	48.89	0	7.3	17.6	2.4
sp|Q5UIP0|RIF1_HUMANTelomere-associatedproteinRIF1OS=HomosapiensGN=RIF1PE=1SV=2;tr|H7C2B5|H7C2B5_HUMANTelomere-associatedproteinRIF1(Fragment)OS=HomosapiensGN=RIF1PE=1SV=1;tr|H7BZN3|H7BZN3_HUMANTelomere-associatedproteinRIF1(Fragment)OS=HomosapiensGN=RIF1PE=1SV=1	sp|Q5UIP0|RIF1_HUMANTelomere-associatedproteinRIF1OS=HomosapiensGN=RIF1PE=1SV=2;tr|H7C2B5|H7C2B5_HUMANTelomere-associatedproteinRIF1(Fragment)OS=HomosapiensGN=RIF1PE=1SV=1	1.65017	2.86894	0	3.47333e+06	10420000	0	0	5731600	9964800	0	10;5;3	10;5;3	10;5;3	;	3	10	10	10	3	3	8	3	2	1	3	3	8	3	2	1	3	3	8	3	2	1	5.5	5.5	5.5	274.46	2472	2472;746;845	0	114	1.5	1.7	4.7	1.5
sp|Q8WUA2|PPIL4_HUMANPeptidyl-prolylcis-transisomerase-like4OS=HomosapiensGN=PPIL4PE=1SV=1	sp|Q8WUA2|PPIL4_HUMANPeptidyl-prolylcis-transisomerase-like4OS=HomosapiensGN=PPIL4PE=1SV=1	0	0	0	3341100	3411400	2909000	3702900	0	0	0	3	3	3		1	3	3	3	2	3	2	1	0	0	2	3	2	1	0	0	2	3	2	1	0	0	7.5	7.5	7.5	57.224	492	492	0	20.307	5.5	7.5	5.5	2.8
sp|P62304|RUXE_HUMANSmallnuclearribonucleoproteinEOS=HomosapiensGN=SNRPEPE=1SV=1;tr|A6NHK2|A6NHK2_HUMANSmallnuclearribonucleoproteinEOS=HomosapiensGN=SNRPEPE=1SV=1	sp|P62304|RUXE_HUMANSmallnuclearribonucleoproteinEOS=HomosapiensGN=SNRPEPE=1SV=1;tr|A6NHK2|A6NHK2_HUMANSmallnuclearribonucleoproteinEOS=HomosapiensGN=SNRPEPE=1SV=1	0	0	0	3.10583e+06	0	0	9317500	0	0	0	2;1	2;1	2;1	;	2	2	2	2	0	0	2	0	0	0	0	0	2	0	0	0	0	0	2	0	0	0	25	25	25	10.803	92	92;52	0	33.42	0	0	25	0
tr|A6NLN1|A6NLN1_HUMANPolypyrimidinetractbindingprotein1,isoformCRA_bOS=HomosapiensGN=PTBP1PE=1SV=4;sp|P26599|PTBP1_HUMANPolypyrimidinetract-bindingprotein1OS=HomosapiensGN=PTBP1PE=1SV=1;tr|A0A0D9SF20|A0A0D9SF20_HUMANPolypyrimidinetractbindingprotein1,isoformCRA_eOS=HomosapiensGN=PTBP1PE=1SV=1;tr|K7EK45|K7EK45_HUMANPolypyrimidinetract-bindingprotein1(Fragment)OS=HomosapiensGN=PTBP1PE=1SV=1;tr|A0A…	tr|A6NLN1|A6NLN1_HUMANPolypyrimidinetractbindingprotein1,isoformCRA_bOS=HomosapiensGN=PTBP1PE=1SV=4;sp|P26599|PTBP1_HUMANPolypyrimidinetract-bindingprotein1OS=HomosapiensGN=PTBP1PE=1SV=1;tr|A0A0D9SF20|A0A0D9SF20_HUMANPolypyrimidinetractbindingprotein1,isoformCRA_eOS=HomosapiensGN=PTBP1PE=1SV=1;tr|K7EK45|K7EK45_HUMANPolypyrimidinetract-bindingprotein1(Fragment)OS=HomosapiensGN=PTBP1PE=1SV=1	0	0	0	3.08373e+06	0	2387700	6863500	0	0	0	4;4;2;2;1;1;1;1	4;4;2;2;1;1;1;1	4;4;2;2;1;1;1;1	;;;	8	4	4	4	0	3	2	2	1	1	0	3	2	2	1	1	0	3	2	2	1	1	11.8	11.8	11.8	56.51	527	527;531;197;256;82;105;149;238	0	54.208	0	9.7	8.2	3.6
tr|E3W994|E3W994_HUMANCLIP-associatingprotein2OS=HomosapiensGN=CLASP2PE=1SV=2;tr|J3KR49|J3KR49_HUMANCLIP-associatingprotein2OS=HomosapiensGN=CLASP2PE=1SV=1;sp|O75122|CLAP2_HUMANCLIP-associatingprotein2OS=HomosapiensGN=CLASP2PE=1SV=2;tr|E7ERI8|E7ERI8_HUMANCLIP-associatingprotein2OS=HomosapiensGN=CLASP2PE=1SV=1;tr|E7EW49|E7EW49_HUMANCLIP-associatingprotein2OS=HomosapiensGN=CLASP2PE=1SV=1;tr|C9J668|…	tr|E3W994|E3W994_HUMANCLIP-associatingprotein2OS=HomosapiensGN=CLASP2PE=1SV=2;tr|J3KR49|J3KR49_HUMANCLIP-associatingprotein2OS=HomosapiensGN=CLASP2PE=1SV=1;sp|O75122|CLAP2_HUMANCLIP-associatingprotein2OS=HomosapiensGN=CLASP2PE=1SV=2;tr|E7ERI8|E7ERI8_HUMANCLIP-associatingprotein2OS=HomosapiensGN=CLASP2PE=1SV=1;tr|E7EW49|E7EW49_HUMANCLIP-associatingprotein2OS=HomosapiensGN=CLASP2PE=1SV=1;tr|C9J668|…	0	0	0	3066800	0	2858000	6342400	0	0	0	5;5;5;5;5;4;4;4;4;1	5;5;5;5;5;4;4;4;4;1	5;5;5;5;5;4;4;4;4;1	;;;;;;;;	10	5	5	5	0	3	5	0	0	0	0	3	5	0	0	0	0	3	5	0	0	0	5.8	5.8	5.8	138.86	1273	1273;1293;1294;1513;1514;178;233;454;458;205	0	32.064	0	3.7	5.8	0
sp|Q9Y2H1|ST38L_HUMANSerine/threonine-proteinkinase38-likeOS=HomosapiensGN=STK38LPE=1SV=3;tr|F5GY51|F5GY51_HUMANSerine/threonine-proteinkinase38-like(Fragment)OS=HomosapiensGN=STK38LPE=1SV=1;tr|I3L0D0|I3L0D0_HUMANSerine/threonine-proteinkinase38-like(Fragment)OS=HomosapiensGN=STK38LPE=1SV=1;tr|F5H7Z3|F5H7Z3_HUMANSerine/threonine-proteinkinase38-like(Fragment)OS=HomosapiensGN=STK38LPE=1SV=1;tr|F5H…	sp|Q9Y2H1|ST38L_HUMANSerine/threonine-proteinkinase38-likeOS=HomosapiensGN=STK38LPE=1SV=3;tr|F5GY51|F5GY51_HUMANSerine/threonine-proteinkinase38-like(Fragment)OS=HomosapiensGN=STK38LPE=1SV=1	0	0	0	2964900	0	0	8894700	0	0	0	7;4;3;3;2;1;1;1	5;2;1;2;2;1;1;1	5;2;1;2;2;1;1;1	;	8	7	5	5	0	4	5	0	0	0	0	2	4	0	0	0	0	2	4	0	0	0	18.3	15.3	15.3	54.002	464	464;131;89;94;214;56;64;87	0	31.23	0	7.8	14.7	0
sp|Q9Y230|RUVB2_HUMANRuvB-like2OS=HomosapiensGN=RUVBL2PE=1SV=3;tr|M0R0Y3|M0R0Y3_HUMANRuvB-like2OS=HomosapiensGN=RUVBL2PE=1SV=1;tr|M0QXI6|M0QXI6_HUMANRuvB-like2(Fragment)OS=HomosapiensGN=RUVBL2PE=1SV=1;tr|X6R2L4|X6R2L4_HUMANRuvB-like2OS=HomosapiensGN=RUVBL2PE=1SV=1	sp|Q9Y230|RUVB2_HUMANRuvB-like2OS=HomosapiensGN=RUVBL2PE=1SV=3;tr|M0R0Y3|M0R0Y3_HUMANRuvB-like2OS=HomosapiensGN=RUVBL2PE=1SV=1	0	0	0	2940600	0	3859700	4962100	0	0	0	5;4;1;1	5;4;1;1	5;4;1;1	;	4	5	5	5	0	3	4	0	0	0	0	3	4	0	0	0	0	3	4	0	0	0	11.2	11.2	11.2	51.156	463	463;354;109;259	0	30.748	0	6.9	8.9	0
tr|Q5JP53|Q5JP53_HUMANTubulinbetachainOS=HomosapiensGN=TUBBPE=1SV=1;sp|P07437|TBB5_HUMANTubulinbetachainOS=HomosapiensGN=TUBBPE=1SV=2;tr|Q5ST81|Q5ST81_HUMANTubulinbetachainOS=HomosapiensGN=TUBBPE=1SV=1;sp|P68371|TBB4B_HUMANTubulinbeta-4BchainOS=HomosapiensGN=TUBB4BPE=1SV=1;sp|P04350|TBB4A_HUMANTubulinbeta-4AchainOS=HomosapiensGN=TUBB4APE=1SV=2;sp|Q9BVA1|TBB2B_HUMANTubulinbeta-2BchainOS=Homosapien…	tr|Q5JP53|Q5JP53_HUMANTubulinbetachainOS=HomosapiensGN=TUBBPE=1SV=1;sp|P07437|TBB5_HUMANTubulinbetachainOS=HomosapiensGN=TUBBPE=1SV=2;tr|Q5ST81|Q5ST81_HUMANTubulinbetachainOS=HomosapiensGN=TUBBPE=1SV=1;sp|P68371|TBB4B_HUMANTubulinbeta-4BchainOS=HomosapiensGN=TUBB4BPE=1SV=1;sp|P04350|TBB4A_HUMANTubulinbeta-4AchainOS=HomosapiensGN=TUBB4APE=1SV=2;sp|Q9BVA1|TBB2B_HUMANTubulinbeta-2BchainOS=Homosapien…	0	0	0	2.89317e+06	0	0	8679500	0	0	0	6;6;5;5;4;4;4;4;4;2;2;2;2;2;2;2;2;1;1;1;1;1;1;1;1;1	6;6;5;5;4;4;4;4;4;2;2;2;2;2;2;2;2;1;1;1;1;1;1;1;1;1	6;6;5;5;4;4;4;4;4;2;2;2;2;2;2;2;2;1;1;1;1;1;1;1;1;1	;;;;;;;;	26	6	6	6	1	2	4	1	1	1	1	2	4	1	1	1	1	2	4	1	1	1	18.3	18.3	18.3	47.766	426	426;444;372;445;444;445;445;450;797;189;338;407;410;410;444;444;446;97;118;144;148;155;161;164;451;536	0	37.245	4.2	6.8	12.7	2.1
tr|A0A087WWU8|A0A087WWU8_HUMANTropomyosinalpha-3chainOS=HomosapiensGN=TPM3PE=1SV=1;tr|Q5HYB6|Q5HYB6_HUMANEpididymisluminalprotein189OS=HomosapiensGN=DKFZp686J1372PE=1SV=1;tr|D6R904|D6R904_HUMANTropomyosinalpha-3chainOS=HomosapiensGN=TPM3PE=1SV=1;tr|Q5VU61|Q5VU61_HUMANTropomyosinalpha-3chainOS=HomosapiensGN=TPM3PE=1SV=2;tr|J3KN67|J3KN67_HUMANTropomyosinalpha-3chainOS=HomosapiensGN=TPM3PE=1SV=1;sp|…	tr|A0A087WWU8|A0A087WWU8_HUMANTropomyosinalpha-3chainOS=HomosapiensGN=TPM3PE=1SV=1;tr|Q5HYB6|Q5HYB6_HUMANEpididymisluminalprotein189OS=HomosapiensGN=DKFZp686J1372PE=1SV=1;tr|D6R904|D6R904_HUMANTropomyosinalpha-3chainOS=HomosapiensGN=TPM3PE=1SV=1;tr|Q5VU61|Q5VU61_HUMANTropomyosinalpha-3chainOS=HomosapiensGN=TPM3PE=1SV=2;tr|J3KN67|J3KN67_HUMANTropomyosinalpha-3chainOS=HomosapiensGN=TPM3PE=1SV=1;sp|…	0	0	0	2841000	8523000	0	0	0	0	0	5;5;3;3;3;3;1;1;1;1;1;1;1;1;1;1;1;1;1;1;1;1;1;1;1;1	5;5;3;3;3;3;1;1;1;1;1;1;1;1;1;1;1;1;1;1;1;1;1;1;1;1	5;5;3;3;3;3;1;1;1;1;1;1;1;1;1;1;1;1;1;1;1;1;1;1;1;1	;;;;;	26	5	5	5	4	2	1	0	0	0	4	2	1	0	0	0	4	2	1	0	0	0	20.7	20.7	20.7	26.42	227	227;232;95;223;285;285;49;68;138;142;157;170;179;223;245;248;248;248;265;275;284;284;284;284;322;326	0	32.44	16.3	9.7	4.4	0
tr|H3BLU7|H3BLU7_HUMANAflatoxinB1aldehydereductasemember2(Fragment)OS=HomosapiensGN=AKR7A2PE=1SV=1;sp|O43488|ARK72_HUMANAflatoxinB1aldehydereductasemember2OS=HomosapiensGN=AKR7A2PE=1SV=3;sp|Q8NHP1|ARK74_HUMANAflatoxinB1aldehydereductasemember4OS=HomosapiensGN=AKR7LPE=2SV=6	tr|H3BLU7|H3BLU7_HUMANAflatoxinB1aldehydereductasemember2(Fragment)OS=HomosapiensGN=AKR7A2PE=1SV=1;sp|O43488|ARK72_HUMANAflatoxinB1aldehydereductasemember2OS=HomosapiensGN=AKR7A2PE=1SV=3	0	0	0	2.81473e+06	0	3393800	5050400	0	0	0	3;3;1	3;3;1	3;3;1	;	3	3	3	3	0	2	3	1	0	0	0	2	3	1	0	0	0	2	3	1	0	0	14.3	14.3	14.3	34.684	314	314;359;331	0	19.075	0	8.3	14.3	6.1
sp|P50991|TCPD_HUMANT-complexprotein1subunitdeltaOS=HomosapiensGN=CCT4PE=1SV=4	sp|P50991|TCPD_HUMANT-complexprotein1subunitdeltaOS=HomosapiensGN=CCT4PE=1SV=4	0	0	0	2746200	0	3374600	4864000	0	0	0	4	4	4		1	4	4	4	0	4	2	0	0	0	0	4	2	0	0	0	0	4	2	0	0	0	13.2	13.2	13.2	57.924	539	539	0	36.477	0	13.2	7.8	0
REV__sp|Q92973|TNPO1_HUMANTransportin-1OS=HomosapiensGN=TNPO1PE=1SV=2	REV__sp|Q92973|TNPO1_HUMANTransportin-1OS=HomosapiensGN=TNPO1PE=1SV=2	0	0	0	2722100	0	0	8166300	0	0	0	1	1	1		1	1	1	1	0	1	1	0	0	0	0	1	1	0	0	0	0	1	1	0	0	0	0	0	0	102.35	898	898	0.0058939	6.2298	0	0	0	0
CON__P02666	CON__P02666	0	0	0	2653000	0	0	7959000	0	0	0	1	1	1		1	1	1	1	0	1	1	0	0	0	0	1	1	0	0	0	0	1	1	0	0	0	9.1	9.1	9.1	23.583	209	209	0	19.196	0	9.1	9.1	0
sp|O75533|SF3B1_HUMANSplicingfactor3Bsubunit1OS=HomosapiensGN=SF3B1PE=1SV=3;tr|H7C341|H7C341_HUMANSplicingfactor3Bsubunit1(Fragment)OS=HomosapiensGN=SF3B1PE=1SV=1;tr|F8WC19|F8WC19_HUMANSplicingfactor3Bsubunit1OS=HomosapiensGN=SF3B1PE=1SV=1;tr|B4DGZ4|B4DGZ4_HUMANSplicingfactor3Bsubunit1OS=HomosapiensGN=SF3B1PE=1SV=1	sp|O75533|SF3B1_HUMANSplicingfactor3Bsubunit1OS=HomosapiensGN=SF3B1PE=1SV=3	0	0	0	2.57887e+06	0	2350000	5386600	0	0	0	7;2;1;1	7;2;1;1	7;2;1;1		4	7	7	7	0	4	5	0	0	0	0	4	5	0	0	0	0	4	5	0	0	0	6	6	6	145.83	1304	1304;241;37;154	0	42.52	0	3.5	4.1	0
tr|B8ZZJ1|B8ZZJ1_HUMANHyccinOS=HomosapiensGN=FAM126APE=1SV=1;tr|H7C0W7|H7C0W7_HUMANHyccin(Fragment)OS=HomosapiensGN=FAM126APE=1SV=1;sp|Q9BYI3|HYCCI_HUMANHyccinOS=HomosapiensGN=FAM126APE=1SV=2;tr|B8ZZA2|B8ZZA2_HUMANHyccinOS=HomosapiensGN=FAM126APE=1SV=1	tr|B8ZZJ1|B8ZZJ1_HUMANHyccinOS=HomosapiensGN=FAM126APE=1SV=1;tr|H7C0W7|H7C0W7_HUMANHyccin(Fragment)OS=HomosapiensGN=FAM126APE=1SV=1;sp|Q9BYI3|HYCCI_HUMANHyccinOS=HomosapiensGN=FAM126APE=1SV=2;tr|B8ZZA2|B8ZZA2_HUMANHyccinOS=HomosapiensGN=FAM126APE=1SV=1	0	0	0	2.53333e+06	0	3211200	4388800	0	0	0	2;2;2;1	2;2;2;1	2;2;2;1	;;;	4	2	2	2	0	2	1	0	0	0	0	2	1	0	0	0	0	2	1	0	0	0	6.2	6.2	6.2	46.919	419	419;471;521;114	0	12.378	0	6.2	4.1	0
sp|Q96BD8|SKA1_HUMANSpindleandkinetochore-associatedprotein1OS=HomosapiensGN=SKA1PE=1SV=1;tr|K7EPW0|K7EPW0_HUMANSpindleandkinetochore-associatedprotein1(Fragment)OS=HomosapiensGN=SKA1PE=1SV=1;tr|K7EP61|K7EP61_HUMANSpindleandkinetochore-associatedprotein1OS=HomosapiensGN=SKA1PE=1SV=1	sp|Q96BD8|SKA1_HUMANSpindleandkinetochore-associatedprotein1OS=HomosapiensGN=SKA1PE=1SV=1	0	0	0	2.51363e+06	7540900	0	0	0	0	0	3;1;1	3;1;1	3;1;1		3	3	3	3	2	0	0	0	0	2	2	0	0	0	0	2	2	0	0	0	0	2	17.3	17.3	17.3	29.484	255	255;91;104	0	17.934	9.8	0	0	0
sp|Q15233|NONO_HUMANNon-POUdomain-containingoctamer-bindingproteinOS=HomosapiensGN=NONOPE=1SV=4;tr|C9IZL7|C9IZL7_HUMANNon-POUdomain-containingoctamer-bindingprotein(Fragment)OS=HomosapiensGN=NONOPE=1SV=1;tr|H7C367|H7C367_HUMANNon-POUdomain-containingoctamer-bindingprotein(Fragment)OS=HomosapiensGN=NONOPE=1SV=5;tr|C9JYS8|C9JYS8_HUMANNon-POUdomain-containingoctamer-bindingprotein(Fragment)OS=Homosa…	sp|Q15233|NONO_HUMANNon-POUdomain-containingoctamer-bindingproteinOS=HomosapiensGN=NONOPE=1SV=4;tr|C9IZL7|C9IZL7_HUMANNon-POUdomain-containingoctamer-bindingprotein(Fragment)OS=HomosapiensGN=NONOPE=1SV=1;tr|H7C367|H7C367_HUMANNon-POUdomain-containingoctamer-bindingprotein(Fragment)OS=HomosapiensGN=NONOPE=1SV=5	0	0	0	2463700	0	2305400	5085700	0	0	0	5;3;3;2;1	4;2;2;2;1	4;2;2;2;1	;;	5	5	4	4	0	4	5	0	0	0	0	3	4	0	0	0	0	3	4	0	0	0	13.8	12.1	12.1	54.231	471	471;207;235;248;124	0	30.847	0	10.8	13.8	0
CON__Streptavidin	CON__Streptavidin	0	0	0	2438900	7316700	0	0	0	0	0	1	1	1		1	1	1	1	1	0	0	0	0	0	1	0	0	0	0	0	1	0	0	0	0	0	11.9	11.9	11.9	16.622	160	160	0	8.0946	11.9	0	0	0
sp|P78332|RBM6_HUMANRNA-bindingprotein6OS=HomosapiensGN=RBM6PE=1SV=5;tr|E9PGM9|E9PGM9_HUMANRNA-bindingprotein6OS=HomosapiensGN=RBM6PE=1SV=1;tr|F8WCA5|F8WCA5_HUMANRNA-bindingprotein6OS=HomosapiensGN=RBM6PE=1SV=1;tr|C9JMC8|C9JMC8_HUMANRNA-bindingprotein6(Fragment)OS=HomosapiensGN=RBM6PE=1SV=1;tr|F8WF63|F8WF63_HUMANRNA-bindingprotein6OS=HomosapiensGN=RBM6PE=1SV=1	sp|P78332|RBM6_HUMANRNA-bindingprotein6OS=HomosapiensGN=RBM6PE=1SV=5;tr|E9PGM9|E9PGM9_HUMANRNA-bindingprotein6OS=HomosapiensGN=RBM6PE=1SV=1;tr|F8WCA5|F8WCA5_HUMANRNA-bindingprotein6OS=HomosapiensGN=RBM6PE=1SV=1	0	0	0	2.42903e+06	0	7287100	0	0	0	0	12;10;8;1;1	11;9;8;1;1	10;8;8;1;1	;;	5	12	11	10	1	9	3	2	0	0	1	8	2	2	0	0	1	7	2	2	0	0	11.5	10.9	10.1	128.64	1123	1123;991;697;76;199	0	65.182	0.7	8.5	3.7	1.4
sp|P10809|CH60_HUMAN60kDaheatshockprotein,mitochondrialOS=HomosapiensGN=HSPD1PE=1SV=2;tr|E7ESH4|E7ESH4_HUMAN60kDaheatshockprotein,mitochondrial(Fragment)OS=HomosapiensGN=HSPD1PE=1SV=1;tr|C9JL19|C9JL19_HUMAN60kDaheatshockprotein,mitochondrial(Fragment)OS=HomosapiensGN=HSPD1PE=1SV=1;tr|C9JCQ4|C9JCQ4_HUMAN60kDaheatshockprotein,mitochondrial(Fragment)OS=HomosapiensGN=HSPD1PE=1SV=1;tr|C9JL25|C9JL25_HU…	sp|P10809|CH60_HUMAN60kDaheatshockprotein,mitochondrialOS=HomosapiensGN=HSPD1PE=1SV=2	0	0	0	2.39777e+06	7193300	0	0	0	0	0	5;2;1;1;1;1	5;2;1;1;1;1	5;2;1;1;1;1		6	5	5	5	2	2	2	0	0	0	2	2	2	0	0	0	2	2	2	0	0	0	14	14	14	61.054	573	573;234;83;94;175;221	0	32.643	8.2	4.2	3.7	0
tr|J3QLI9|J3QLI9_HUMANSmallnuclearribonucleoproteinSmD1OS=HomosapiensGN=SNRPD1PE=1SV=1;sp|P62314|SMD1_HUMANSmallnuclearribonucleoproteinSmD1OS=HomosapiensGN=SNRPD1PE=1SV=1	tr|J3QLI9|J3QLI9_HUMANSmallnuclearribonucleoproteinSmD1OS=HomosapiensGN=SNRPD1PE=1SV=1;sp|P62314|SMD1_HUMANSmallnuclearribonucleoproteinSmD1OS=HomosapiensGN=SNRPD1PE=1SV=1	0	0	0	2.36393e+06	0	0	7091800	0	0	0	1;1	1;1	1;1	;	2	1	1	1	0	1	1	0	0	0	0	1	1	0	0	0	0	1	1	0	0	0	17.3	17.3	17.3	8.3926	75	75;119	0	8.1963	0	17.3	17.3	0
sp|O95721|SNP29_HUMANSynaptosomal-associatedprotein29OS=HomosapiensGN=SNAP29PE=1SV=1;tr|C9JAF7|C9JAF7_HUMANSynaptosomal-associatedprotein(Fragment)OS=HomosapiensGN=SNAP29PE=1SV=1	sp|O95721|SNP29_HUMANSynaptosomal-associatedprotein29OS=HomosapiensGN=SNAP29PE=1SV=1	0	0	0	2.34073e+06	7022200	0	0	0	0	0	3;1	3;1	3;1		2	3	3	3	3	0	0	0	0	0	3	0	0	0	0	0	3	0	0	0	0	0	13.2	13.2	13.2	28.97	258	258;160	0	18.053	13.2	0	0	0
tr|F8VQ14|F8VQ14_HUMANT-complexprotein1subunitbetaOS=HomosapiensGN=CCT2PE=1SV=1;tr|F5GWF6|F5GWF6_HUMANT-complexprotein1subunitbetaOS=HomosapiensGN=CCT2PE=1SV=2;sp|P78371|TCPB_HUMANT-complexprotein1subunitbetaOS=HomosapiensGN=CCT2PE=1SV=4	tr|F8VQ14|F8VQ14_HUMANT-complexprotein1subunitbetaOS=HomosapiensGN=CCT2PE=1SV=1;tr|F5GWF6|F5GWF6_HUMANT-complexprotein1subunitbetaOS=HomosapiensGN=CCT2PE=1SV=2;sp|P78371|TCPB_HUMANT-complexprotein1subunitbetaOS=HomosapiensGN=CCT2PE=1SV=4	0	0	0	2.32727e+06	0	2979000	4002800	0	0	0	3;3;3	3;3;3	3;3;3	;;	3	3	3	3	0	2	3	0	0	0	0	2	3	0	0	0	0	2	3	0	0	0	9.1	9.1	9.1	44.812	416	416;530;535	0	19.472	0	6.2	9.1	0
sp|P05387|RLA2_HUMAN60SacidicribosomalproteinP2OS=HomosapiensGN=RPLP2PE=1SV=1;tr|H0YDD8|H0YDD8_HUMAN60SacidicribosomalproteinP2(Fragment)OS=HomosapiensGN=RPLP2PE=1SV=1	sp|P05387|RLA2_HUMAN60SacidicribosomalproteinP2OS=HomosapiensGN=RPLP2PE=1SV=1;tr|H0YDD8|H0YDD8_HUMAN60SacidicribosomalproteinP2(Fragment)OS=HomosapiensGN=RPLP2PE=1SV=1	0	0	0	2.32063e+06	0	3158200	3803700	0	0	0	3;2	3;2	3;2	;	2	3	3	3	0	2	3	0	1	1	0	2	3	0	1	1	0	2	3	0	1	1	53	53	53	11.665	115	115;92	0	23.172	0	24.3	53	0
sp|P52756|RBM5_HUMANRNA-bindingprotein5OS=HomosapiensGN=RBM5PE=1SV=2;tr|C9JFQ5|C9JFQ5_HUMANRNA-bindingprotein5(Fragment)OS=HomosapiensGN=RBM5PE=1SV=1;tr|C9J9P7|C9J9P7_HUMANRNA-bindingprotein5(Fragment)OS=HomosapiensGN=RBM5PE=1SV=1;tr|F8WE23|F8WE23_HUMANRNA-bindingprotein5OS=HomosapiensGN=RBM5PE=1SV=1;tr|C9JR02|C9JR02_HUMANRNA-bindingprotein5(Fragment)OS=HomosapiensGN=RBM5PE=1SV=1;tr|F8W910|F8W910…	sp|P52756|RBM5_HUMANRNA-bindingprotein5OS=HomosapiensGN=RBM5PE=1SV=2;tr|C9JFQ5|C9JFQ5_HUMANRNA-bindingprotein5(Fragment)OS=HomosapiensGN=RBM5PE=1SV=1	0	0	0	2.22867e+06	0	0	6686000	0	0	0	6;3;2;1;1;1	4;3;2;1;1;1	4;3;2;1;1;1	;	6	6	4	4	0	3	5	0	1	0	0	1	4	0	1	0	0	1	4	0	1	0	9	6.4	6.4	92.153	815	815;137;120;81;105;139	0	23.715	0	4.4	7.9	0
sp|Q9UMS4|PRP19_HUMANPre-mRNA-processingfactor19OS=HomosapiensGN=PRPF19PE=1SV=1;tr|H0YGF3|H0YGF3_HUMANPre-mRNA-processingfactor19(Fragment)OS=HomosapiensGN=PRPF19PE=1SV=1;tr|F5GY56|F5GY56_HUMANPre-mRNA-processingfactor19(Fragment)OS=HomosapiensGN=PRPF19PE=1SV=1	sp|Q9UMS4|PRP19_HUMANPre-mRNA-processingfactor19OS=HomosapiensGN=PRPF19PE=1SV=1	0	0	0	2.19163e+06	0	0	6574900	0	0	0	5;1;1	5;1;1	5;1;1		3	5	5	5	0	2	3	0	1	0	0	2	3	0	1	0	0	2	3	0	1	0	14.5	14.5	14.5	55.18	504	504;45;252	0	30.611	0	5	9.5	0
sp|Q9ULV0|MYO5B_HUMANUnconventionalmyosin-VbOS=HomosapiensGN=MYO5BPE=1SV=3;tr|Q7Z7A5|Q7Z7A5_HUMANMyosin5BOS=HomosapiensGN=MYO5BPE=1SV=1;tr|H0YM93|H0YM93_HUMANUnconventionalmyosin-Vc(Fragment)OS=HomosapiensGN=MYO5CPE=1SV=1;tr|H0YMK3|H0YMK3_HUMANUnconventionalmyosin-VcOS=HomosapiensGN=MYO5CPE=1SV=1;tr|A0A0A0MR36|A0A0A0MR36_HUMANUnconventionalmyosin-Vb(Fragment)OS=HomosapiensGN=MYO5BPE=1SV=1;sp|Q9NQ…	sp|Q9ULV0|MYO5B_HUMANUnconventionalmyosin-VbOS=HomosapiensGN=MYO5BPE=1SV=3;tr|Q7Z7A5|Q7Z7A5_HUMANMyosin5BOS=HomosapiensGN=MYO5BPE=1SV=1	0	0	0	2.19147e+06	0	6574400	0	0	0	0	7;5;1;1;1;1;1;1;1;1;1	7;5;1;1;1;1;1;1;1;1;1	7;5;1;1;1;1;1;1;1;1;1	;	11	7	7	7	0	5	4	0	0	0	0	5	4	0	0	0	0	5	4	0	0	0	5.1	5.1	5.1	213.67	1848	1848;720;106;269;965;1742;1828;1853;1855;1855;1855	0	51.366	0	3.8	3.3	0
sp|O75643|U520_HUMANU5smallnuclearribonucleoprotein200kDahelicaseOS=HomosapiensGN=SNRNP200PE=1SV=2;tr|B4E0P5|B4E0P5_HUMANU5smallnuclearribonucleoprotein200kDahelicaseOS=HomosapiensGN=SNRNP200PE=1SV=1	sp|O75643|U520_HUMANU5smallnuclearribonucleoprotein200kDahelicaseOS=HomosapiensGN=SNRNP200PE=1SV=2	0	0	0	2158900	0	0	6476700	0	0	0	14;5	14;5	14;5		2	14	14	14	0	7	7	0	2	1	0	7	7	0	2	1	0	7	7	0	2	1	8.6	8.6	8.6	244.5	2136	2136;595	0	92.615	0	4.3	4.6	0
tr|H0Y4X3|H0Y4X3_HUMANRNA-bindingprotein39(Fragment)OS=HomosapiensGN=RBM39PE=1SV=5;tr|G3XAC6|G3XAC6_HUMANRNA-bindingprotein39OS=HomosapiensGN=RBM39PE=1SV=1;sp|Q14498|RBM39_HUMANRNA-bindingprotein39OS=HomosapiensGN=RBM39PE=1SV=2;tr|Q5QP23|Q5QP23_HUMANRNA-bindingprotein39(Fragment)OS=HomosapiensGN=RBM39PE=1SV=1	tr|H0Y4X3|H0Y4X3_HUMANRNA-bindingprotein39(Fragment)OS=HomosapiensGN=RBM39PE=1SV=5;tr|G3XAC6|G3XAC6_HUMANRNA-bindingprotein39OS=HomosapiensGN=RBM39PE=1SV=1;sp|Q14498|RBM39_HUMANRNA-bindingprotein39OS=HomosapiensGN=RBM39PE=1SV=2;tr|Q5QP23|Q5QP23_HUMANRNA-bindingprotein39(Fragment)OS=HomosapiensGN=RBM39PE=1SV=1	0	0	0	2.15143e+06	0	2463600	3990700	0	0	0	2;2;2;1	2;2;2;1	2;2;2;1	;;;	4	2	2	2	0	2	2	0	0	0	0	2	2	0	0	0	0	2	2	0	0	0	9.5	9.5	9.5	36.585	337	337;423;530;231	0	13.534	0	9.5	9.5	0
sp|Q9NWU2|GID8_HUMANGlucose-induceddegradationprotein8homologOS=HomosapiensGN=GID8PE=1SV=1	sp|Q9NWU2|GID8_HUMANGlucose-induceddegradationprotein8homologOS=HomosapiensGN=GID8PE=1SV=1	0	0	0	2.13977e+06	6419300	0	0	0	0	0	2	2	2		1	2	2	2	2	0	0	0	0	0	2	0	0	0	0	0	2	0	0	0	0	0	12.7	12.7	12.7	26.748	228	228	0	33.087	12.7	0	0	0
sp|Q9BPZ2|SPI2B_HUMANSpindlin-2BOS=HomosapiensGN=SPIN2BPE=2SV=1;sp|Q99865|SPI2A_HUMANSpindlin-2AOS=HomosapiensGN=SPIN2APE=1SV=3;tr|Q5JZB8|Q5JZB8_HUMANSpindlin-2B(Fragment)OS=HomosapiensGN=SPIN2BPE=4SV=1	sp|Q9BPZ2|SPI2B_HUMANSpindlin-2BOS=HomosapiensGN=SPIN2BPE=2SV=1;sp|Q99865|SPI2A_HUMANSpindlin-2AOS=HomosapiensGN=SPIN2APE=1SV=3;tr|Q5JZB8|Q5JZB8_HUMANSpindlin-2B(Fragment)OS=HomosapiensGN=SPIN2BPE=4SV=1	0	0	0	2131700	0	6395100	0	0	0	0	3;3;2	2;2;2	2;2;2	;;	3	3	2	2	1	2	2	0	0	0	0	2	1	0	0	0	0	2	1	0	0	0	16.7	11.2	11.2	29.158	258	258;258;247	0	11.99	5.4	11.2	9.7	0
sp|P05787|K2C8_HUMANKeratin,typeIIcytoskeletal8OS=HomosapiensGN=KRT8PE=1SV=7;CON__P05787;tr|F8VUG2|F8VUG2_HUMANKeratin,typeIIcytoskeletal8(Fragment)OS=HomosapiensGN=KRT8PE=1SV=1;tr|F8W1U3|F8W1U3_HUMANKeratin,typeIIcytoskeletal8(Fragment)OS=HomosapiensGN=KRT8PE=1SV=1;tr|F8VP67|F8VP67_HUMANKeratin,typeIIcytoskeletal8(Fragment)OS=HomosapiensGN=KRT8PE=1SV=1;CON__Q9DCV7;sp|P08729|K2C7_HUMANKeratin,typ…	sp|P05787|K2C8_HUMANKeratin,typeIIcytoskeletal8OS=HomosapiensGN=KRT8PE=1SV=7;CON__P05787;tr|F8VUG2|F8VUG2_HUMANKeratin,typeIIcytoskeletal8(Fragment)OS=HomosapiensGN=KRT8PE=1SV=1;tr|F8W1U3|F8W1U3_HUMANKeratin,typeIIcytoskeletal8(Fragment)OS=HomosapiensGN=KRT8PE=1SV=1	0	0	0	2.11643e+06	0	3513800	2835500	0	0	0	10;10;7;7;4;4;4;4;4;3;3;3;1	4;4;2;2;2;0;0;0;0;1;2;1;1	4;4;2;2;2;0;0;0;0;1;2;1;1	;;;	13	10	4	4	1	9	4	2	1	1	0	4	2	0	1	1	0	4	2	0	1	1	15.9	8.7	8.7	53.704	483	483;483;273;289;113;457;469;469;469;99;443;499;213	0	24.99	1.4	15.9	8.3	3.5
sp|P38646|GRP75_HUMANStress-70protein,mitochondrialOS=HomosapiensGN=HSPA9PE=1SV=2;tr|D6RA73|D6RA73_HUMANStress-70protein,mitochondrial(Fragment)OS=HomosapiensGN=HSPA9PE=1SV=1;tr|D6RJI2|D6RJI2_HUMANStress-70protein,mitochondrial(Fragment)OS=HomosapiensGN=HSPA9PE=1SV=1;tr|H0Y8S0|H0Y8S0_HUMANStress-70protein,mitochondrial(Fragment)OS=HomosapiensGN=HSPA9PE=1SV=1	sp|P38646|GRP75_HUMANStress-70protein,mitochondrialOS=HomosapiensGN=HSPA9PE=1SV=2	0	0	0	2110600	0	2777000	3554800	0	0	0	6;2;2;1	6;2;2;1	6;2;2;1		4	6	6	6	1	3	4	0	0	0	1	3	4	0	0	0	1	3	4	0	0	0	13.1	13.1	13.1	73.68	679	679;62;95;102	0	37.128	3.2	5.7	7.8	0
tr|H3BU53|H3BU53_HUMANMAXgene-associatedprotein(Fragment)OS=HomosapiensGN=MGAPE=1SV=1	tr|H3BU53|H3BU53_HUMANMAXgene-associatedprotein(Fragment)OS=HomosapiensGN=MGAPE=1SV=1	0	0	0	2.10213e+06	0	0	6306400	0	0	0	13	2	2		1	13	2	2	0	9	6	1	0	0	0	1	1	0	0	0	0	1	1	0	0	0	14.5	1.9	1.9	127.14	1174	1174	0	12.061	0	10	7.9	1.4
sp|Q9Y5S9|RBM8A_HUMANRNA-bindingprotein8AOS=HomosapiensGN=RBM8APE=1SV=1	sp|Q9Y5S9|RBM8A_HUMANRNA-bindingprotein8AOS=HomosapiensGN=RBM8APE=1SV=1	0	0	0	2.00353e+06	0	3314500	2696100	0	0	0	2	2	2		1	2	2	2	0	2	2	0	0	0	0	2	2	0	0	0	0	2	2	0	0	0	17.2	17.2	17.2	19.889	174	174	0	15.972	0	17.2	17.2	0
tr|A0A087WZZ5|A0A087WZZ5_HUMANSplicingfactor3Bsubunit2OS=HomosapiensGN=SF3B2PE=1SV=1;sp|Q13435|SF3B2_HUMANSplicingfactor3Bsubunit2OS=HomosapiensGN=SF3B2PE=1SV=2;tr|E9PPJ0|E9PPJ0_HUMANSplicingfactor3Bsubunit2OS=HomosapiensGN=SF3B2PE=1SV=1;tr|E9PJT3|E9PJT3_HUMANSplicingfactor3Bsubunit2(Fragment)OS=HomosapiensGN=SF3B2PE=1SV=1;tr|E9PJ04|E9PJ04_HUMANSplicingfactor3Bsubunit2(Fragment)OS=HomosapiensGN=S…	tr|A0A087WZZ5|A0A087WZZ5_HUMANSplicingfactor3Bsubunit2OS=HomosapiensGN=SF3B2PE=1SV=1;sp|Q13435|SF3B2_HUMANSplicingfactor3Bsubunit2OS=HomosapiensGN=SF3B2PE=1SV=2;tr|E9PPJ0|E9PPJ0_HUMANSplicingfactor3Bsubunit2OS=HomosapiensGN=SF3B2PE=1SV=1;tr|E9PJT3|E9PJT3_HUMANSplicingfactor3Bsubunit2(Fragment)OS=HomosapiensGN=SF3B2PE=1SV=1;tr|E9PJ04|E9PJ04_HUMANSplicingfactor3Bsubunit2(Fragment)OS=HomosapiensGN=S…	0	0	0	1988100	0	2826100	3138200	0	0	0	7;7;6;5;5;5;2;1	7;7;6;5;5;5;2;1	7;7;6;5;5;5;2;1	;;;;;	8	7	7	7	4	3	4	0	0	0	4	3	4	0	0	0	4	3	4	0	0	0	8.5	8.5	8.5	97.584	871	871;895;878;273;354;387;315;81	0	44.687	5.2	4.2	5.7	0
sp|Q8N7H5|PAF1_HUMANRNApolymeraseII-associatedfactor1homologOS=HomosapiensGN=PAF1PE=1SV=2;tr|B4DGJ5|B4DGJ5_HUMANRNApolymeraseII-associatedfactor1homologOS=HomosapiensGN=PAF1PE=1SV=1	sp|Q8N7H5|PAF1_HUMANRNApolymeraseII-associatedfactor1homologOS=HomosapiensGN=PAF1PE=1SV=2	0	0	0	1966900	0	2472000	3428700	0	0	0	6;2	6;2	6;2		2	6	6	6	2	2	4	2	0	0	2	2	4	2	0	0	2	2	4	2	0	0	11.5	11.5	11.5	59.975	531	531;288	0	49.9	4.9	6.8	8.9	5.1
tr|E5RFX8|E5RFX8_HUMANCyclin-C(Fragment)OS=HomosapiensGN=CCNCPE=1SV=1;tr|E5RI39|E5RI39_HUMANCyclin-C(Fragment)OS=HomosapiensGN=CCNCPE=1SV=1;tr|G5E954|G5E954_HUMANCyclinC,isoformCRA_cOS=HomosapiensGN=CCNCPE=1SV=1;tr|H0YBQ5|H0YBQ5_HUMANCyclin-C(Fragment)OS=HomosapiensGN=CCNCPE=1SV=1;tr|J3KP90|J3KP90_HUMANCyclin-COS=HomosapiensGN=CCNCPE=1SV=1;tr|E5RFK5|E5RFK5_HUMANCyclin-COS=HomosapiensGN=CCNCPE=1SV…	tr|E5RFX8|E5RFX8_HUMANCyclin-C(Fragment)OS=HomosapiensGN=CCNCPE=1SV=1;tr|E5RI39|E5RI39_HUMANCyclin-C(Fragment)OS=HomosapiensGN=CCNCPE=1SV=1;tr|G5E954|G5E954_HUMANCyclinC,isoformCRA_cOS=HomosapiensGN=CCNCPE=1SV=1;tr|H0YBQ5|H0YBQ5_HUMANCyclin-C(Fragment)OS=HomosapiensGN=CCNCPE=1SV=1;tr|J3KP90|J3KP90_HUMANCyclin-COS=HomosapiensGN=CCNCPE=1SV=1;tr|E5RFK5|E5RFK5_HUMANCyclin-COS=HomosapiensGN=CCNCPE=1SV…	0	0	0	1.88597e+06	5657900	0	0	0	0	0	1;1;1;1;1;1;1	1;1;1;1;1;1;1	1;1;1;1;1;1;1	;;;;;;	7	1	1	1	1	0	0	0	0	0	1	0	0	0	0	0	1	0	0	0	0	0	6.2	6.2	6.2	19.13	162	162;192;202;228;282;282;283	0.0039841	6.2873	6.2	0	0	0
sp|Q96N67|DOCK7_HUMANDedicatorofcytokinesisprotein7OS=HomosapiensGN=DOCK7PE=1SV=4;tr|A0A0C4DGY6|A0A0C4DGY6_HUMANDedicatorofcytokinesisprotein7OS=HomosapiensGN=DOCK7PE=1SV=1;tr|H0Y7L2|H0Y7L2_HUMANDedicatorofcytokinesisprotein7(Fragment)OS=HomosapiensGN=DOCK7PE=1SV=1	sp|Q96N67|DOCK7_HUMANDedicatorofcytokinesisprotein7OS=HomosapiensGN=DOCK7PE=1SV=4;tr|A0A0C4DGY6|A0A0C4DGY6_HUMANDedicatorofcytokinesisprotein7OS=HomosapiensGN=DOCK7PE=1SV=1	0	0	0	1.80103e+06	0	5403100	0	0	0	0	7;5;3	7;5;3	7;5;3	;	3	7	7	7	0	7	2	0	0	0	0	7	2	0	0	0	0	7	2	0	0	0	3.8	3.8	3.8	242.56	2140	2140;803;1303	0	43.899	0	3.8	1	0
sp|Q16643|DREB_HUMANDrebrinOS=HomosapiensGN=DBN1PE=1SV=4;tr|D6R9W4|D6R9W4_HUMANDrebrin(Fragment)OS=HomosapiensGN=DBN1PE=1SV=1;tr|D6R9Q9|D6R9Q9_HUMANDrebrinOS=HomosapiensGN=DBN1PE=1SV=1;tr|D6RCR4|D6RCR4_HUMANDrebrin(Fragment)OS=HomosapiensGN=DBN1PE=1SV=1;tr|D6RFI1|D6RFI1_HUMANDrebrin(Fragment)OS=HomosapiensGN=DBN1PE=1SV=1	sp|Q16643|DREB_HUMANDrebrinOS=HomosapiensGN=DBN1PE=1SV=4;tr|D6R9W4|D6R9W4_HUMANDrebrin(Fragment)OS=HomosapiensGN=DBN1PE=1SV=1;tr|D6R9Q9|D6R9Q9_HUMANDrebrinOS=HomosapiensGN=DBN1PE=1SV=1	0	0	0	1.79277e+06	0	5378300	0	0	0	0	5;3;3;1;1	5;3;3;1;1	5;3;3;1;1	;;	5	5	5	5	0	4	0	1	1	0	0	4	0	1	1	0	0	4	0	1	1	0	8.9	8.9	8.9	71.428	649	649;317;391;93;124	0	36.23	0	5.9	0	3.1
tr|K7EMM8|K7EMM8_HUMANPutativeoxidoreductaseGLYR1(Fragment)OS=HomosapiensGN=GLYR1PE=1SV=2;sp|Q49A26|GLYR1_HUMANPutativeoxidoreductaseGLYR1OS=HomosapiensGN=GLYR1PE=1SV=3	tr|K7EMM8|K7EMM8_HUMANPutativeoxidoreductaseGLYR1(Fragment)OS=HomosapiensGN=GLYR1PE=1SV=2;sp|Q49A26|GLYR1_HUMANPutativeoxidoreductaseGLYR1OS=HomosapiensGN=GLYR1PE=1SV=3	0	0	0	1.73927e+06	5217800	0	0	0	0	0	2;2	2;2	2;2	;	2	2	2	2	2	0	0	0	0	0	2	0	0	0	0	0	2	0	0	0	0	0	5.7	5.7	5.7	57.215	524	524;553	0	13.125	5.7	0	0	0
sp|Q9Y277|VDAC3_HUMANVoltage-dependentanion-selectivechannelprotein3OS=HomosapiensGN=VDAC3PE=1SV=1	sp|Q9Y277|VDAC3_HUMANVoltage-dependentanion-selectivechannelprotein3OS=HomosapiensGN=VDAC3PE=1SV=1	0	0	0	1711500	0	1610200	3524300	0	0	0	2	2	2		1	2	2	2	0	2	2	0	0	1	0	2	2	0	0	1	0	2	2	0	0	1	11	11	11	30.658	283	283	0	12.082	0	11	11	0
sp|Q9NW64|RBM22_HUMANPre-mRNA-splicingfactorRBM22OS=HomosapiensGN=RBM22PE=1SV=1	sp|Q9NW64|RBM22_HUMANPre-mRNA-splicingfactorRBM22OS=HomosapiensGN=RBM22PE=1SV=1	0	0	0	1.65663e+06	4969900	0	0	0	0	0	2	2	2		1	2	2	2	2	0	0	0	0	0	2	0	0	0	0	0	2	0	0	0	0	0	5	5	5	46.895	420	420	0	12.712	5	0	0	0
tr|F8VSE7|F8VSE7_HUMANTranscriptionfactorE2F7(Fragment)OS=HomosapiensGN=E2F7PE=1SV=1;sp|Q96AV8|E2F7_HUMANTranscriptionfactorE2F7OS=HomosapiensGN=E2F7PE=1SV=3;tr|F8VXV5|F8VXV5_HUMANTranscriptionfactorE2F7(Fragment)OS=HomosapiensGN=E2F7PE=1SV=1;tr|H0YHW2|H0YHW2_HUMANTranscriptionfactorE2F7(Fragment)OS=HomosapiensGN=E2F7PE=1SV=1;tr|H0YIF4|H0YIF4_HUMANTranscriptionfactorE2F7(Fragment)OS=HomosapiensGN…	tr|F8VSE7|F8VSE7_HUMANTranscriptionfactorE2F7(Fragment)OS=HomosapiensGN=E2F7PE=1SV=1;sp|Q96AV8|E2F7_HUMANTranscriptionfactorE2F7OS=HomosapiensGN=E2F7PE=1SV=3;tr|F8VXV5|F8VXV5_HUMANTranscriptionfactorE2F7(Fragment)OS=HomosapiensGN=E2F7PE=1SV=1	0	0	0	1.61123e+06	0	2598200	2235500	0	0	0	5;5;3;1;1	5;5;3;1;1	5;5;3;1;1	;;	5	5	5	5	0	2	5	0	0	0	0	2	5	0	0	0	0	2	5	0	0	0	9.8	9.8	9.8	77.055	693	693;911;115;208;219	0	33.817	0	4.3	9.8	0
sp|O43809|CPSF5_HUMANCleavageandpolyadenylationspecificityfactorsubunit5OS=HomosapiensGN=NUDT21PE=1SV=1;tr|H3BND3|H3BND3_HUMANCleavageandpolyadenylation-specificityfactorsubunit5(Fragment)OS=HomosapiensGN=NUDT21PE=1SV=5;tr|H3BV41|H3BV41_HUMANCleavageandpolyadenylation-specificityfactorsubunit5(Fragment)OS=HomosapiensGN=NUDT21PE=1SV=1	sp|O43809|CPSF5_HUMANCleavageandpolyadenylationspecificityfactorsubunit5OS=HomosapiensGN=NUDT21PE=1SV=1;tr|H3BND3|H3BND3_HUMANCleavageandpolyadenylation-specificityfactorsubunit5(Fragment)OS=HomosapiensGN=NUDT21PE=1SV=5	0	0	0	1.56117e+06	0	0	4683500	0	0	0	3;2;1	3;2;1	3;2;1	;	3	3	3	3	0	1	3	0	0	0	0	1	3	0	0	0	0	1	3	0	0	0	17.2	17.2	17.2	26.227	227	227;150;71	0	18.673	0	7.9	17.2	0
sp|Q86TV6|TTC7B_HUMANTetratricopeptiderepeatprotein7BOS=HomosapiensGN=TTC7BPE=1SV=3;tr|H0YJP9|H0YJP9_HUMANTetratricopeptiderepeatprotein7B(Fragment)OS=HomosapiensGN=TTC7BPE=1SV=1;tr|G3V3H1|G3V3H1_HUMANTetratricopeptiderepeatprotein7B(Fragment)OS=HomosapiensGN=TTC7BPE=1SV=5;tr|H0YJS2|H0YJS2_HUMANTetratricopeptiderepeatprotein7B(Fragment)OS=HomosapiensGN=TTC7BPE=1SV=1;tr|A0A0C4DGK5|A0A0C4DGK5_HUMAN…	sp|Q86TV6|TTC7B_HUMANTetratricopeptiderepeatprotein7BOS=HomosapiensGN=TTC7BPE=1SV=3	0	0	0	1.55547e+06	0	0	4666400	0	0	0	4;1;1;1;1;1	4;1;1;1;1;1	4;1;1;1;1;1		6	4	4	4	0	1	4	0	0	0	0	1	4	0	0	0	0	1	4	0	0	0	5.1	5.1	5.1	94.178	843	843;175;205;271;330;417	0	22.633	0	1.1	5.1	0
sp|Q9P1Y5|CAMP3_HUMANCalmodulin-regulatedspectrin-associatedprotein3OS=HomosapiensGN=CAMSAP3PE=1SV=2	sp|Q9P1Y5|CAMP3_HUMANCalmodulin-regulatedspectrin-associatedprotein3OS=HomosapiensGN=CAMSAP3PE=1SV=2	0	0	0	1.48583e+06	0	2180800	2276700	0	0	0	5	5	5		1	5	5	5	0	3	4	0	0	0	0	3	4	0	0	0	0	3	4	0	0	0	5.4	5.4	5.4	134.75	1249	1249	0	30.09	0	3.6	4	0
sp|P62857|RS28_HUMAN40SribosomalproteinS28OS=HomosapiensGN=RPS28PE=1SV=1	sp|P62857|RS28_HUMAN40SribosomalproteinS28OS=HomosapiensGN=RPS28PE=1SV=1	0	0	0	1.43533e+06	0	0	4306000	0	0	0	1	1	1		1	1	1	1	1	1	1	0	0	0	1	1	1	0	0	0	1	1	1	0	0	0	17.4	17.4	17.4	7.8409	69	69	0	7.4622	17.4	17.4	17.4	0
tr|Q49AN9|Q49AN9_HUMANSNRPGproteinOS=HomosapiensGN=SNRPGPE=1SV=1;tr|F5H013|F5H013_HUMANSmallnuclearribonucleoproteinGOS=HomosapiensGN=SNRPGPE=1SV=1;sp|P62308|RUXG_HUMANSmallnuclearribonucleoproteinGOS=HomosapiensGN=SNRPGPE=1SV=1;sp|A8MWD9|RUXGL_HUMANPutativesmallnuclearribonucleoproteinG-likeprotein15OS=HomosapiensGN=SNRPGP15PE=5SV=2;tr|C9JVQ0|C9JVQ0_HUMANSmallnuclearribonucleoproteinGOS=Homosapi…	tr|Q49AN9|Q49AN9_HUMANSNRPGproteinOS=HomosapiensGN=SNRPGPE=1SV=1;tr|F5H013|F5H013_HUMANSmallnuclearribonucleoproteinGOS=HomosapiensGN=SNRPGPE=1SV=1;sp|P62308|RUXG_HUMANSmallnuclearribonucleoproteinGOS=HomosapiensGN=SNRPGPE=1SV=1;sp|A8MWD9|RUXGL_HUMANPutativesmallnuclearribonucleoproteinG-likeprotein15OS=HomosapiensGN=SNRPGP15PE=5SV=2;tr|C9JVQ0|C9JVQ0_HUMANSmallnuclearribonucleoproteinGOS=Homosapi…	0	0	0	1396100	0	4188300	0	0	0	0	2;2;2;2;1	2;2;2;2;1	2;2;2;2;1	;;;;	5	2	2	2	0	2	0	0	0	0	0	2	0	0	0	0	0	2	0	0	0	0	31.2	31.2	31.2	7.1013	64	64;68;76;76;96	0	12.614	0	31.2	0	0
sp|P25398|RS12_HUMAN40SribosomalproteinS12OS=HomosapiensGN=RPS12PE=1SV=3	sp|P25398|RS12_HUMAN40SribosomalproteinS12OS=HomosapiensGN=RPS12PE=1SV=3	0	0	0	1.38797e+06	0	0	4163900	0	0	0	3	3	3		1	3	3	3	0	2	2	0	0	0	0	2	2	0	0	0	0	2	2	0	0	0	30.3	30.3	30.3	14.515	132	132	0	22.13	0	13.6	24.2	0
sp|P02545|LMNA_HUMANPrelamin-A/COS=HomosapiensGN=LMNAPE=1SV=1;tr|Q3BDU5|Q3BDU5_HUMANPrelamin-A/COS=HomosapiensGN=LMNAPE=1SV=1;tr|Q5TCI8|Q5TCI8_HUMANPrelamin-A/COS=HomosapiensGN=LMNAPE=1SV=1;tr|H0YAB0|H0YAB0_HUMANPrelamin-A/C(Fragment)OS=HomosapiensGN=LMNAPE=1SV=1;tr|A0A0C4DGC5|A0A0C4DGC5_HUMANPrelamin-A/C(Fragment)OS=HomosapiensGN=LMNAPE=1SV=1	sp|P02545|LMNA_HUMANPrelamin-A/COS=HomosapiensGN=LMNAPE=1SV=1;tr|Q3BDU5|Q3BDU5_HUMANPrelamin-A/COS=HomosapiensGN=LMNAPE=1SV=1;tr|Q5TCI8|Q5TCI8_HUMANPrelamin-A/COS=HomosapiensGN=LMNAPE=1SV=1	0	0	0	1.36973e+06	0	4109200	0	0	0	0	7;6;5;3;1	7;6;5;3;1	7;6;5;3;1	;;	5	7	7	7	0	5	3	0	0	0	0	5	3	0	0	0	0	5	3	0	0	0	12.2	12.2	12.2	74.139	664	664;487;491;182;260	0	42.879	0	9.3	5	0
CON__P12763	CON__P12763	0	0	0	1364000	0	2198300	1893700	0	0	0	2	2	2		1	2	2	2	1	2	2	0	0	0	1	2	2	0	0	0	1	2	2	0	0	0	7.2	7.2	7.2	38.418	359	359	0	12.251	4.2	7.2	7.2	0
sp|Q14152|EIF3A_HUMANEukaryotictranslationinitiationfactor3subunitAOS=HomosapiensGN=EIF3APE=1SV=1	sp|Q14152|EIF3A_HUMANEukaryotictranslationinitiationfactor3subunitAOS=HomosapiensGN=EIF3APE=1SV=1	0	0	0	1.32807e+06	0	3984200	0	0	0	0	3	3	3		1	3	3	3	0	2	1	0	0	0	0	2	1	0	0	0	0	2	1	0	0	0	2.7	2.7	2.7	166.57	1382	1382	0	28.977	0	1.7	0.9	0
sp|P51587|BRCA2_HUMANBreastcancertype2susceptibilityproteinOS=HomosapiensGN=BRCA2PE=1SV=2	sp|P51587|BRCA2_HUMANBreastcancertype2susceptibilityproteinOS=HomosapiensGN=BRCA2PE=1SV=2	0	0	0	1290400	0	2068500	1802700	0	0	0	5	5	5		1	5	5	5	0	4	3	0	0	0	0	4	3	0	0	0	0	4	3	0	0	0	2.2	2.2	2.2	384.22	3418	3418	0	30.032	0	1.8	1.3	0
sp|P60866|RS20_HUMAN40SribosomalproteinS20OS=HomosapiensGN=RPS20PE=1SV=1;tr|E5RIP1|E5RIP1_HUMAN40SribosomalproteinS20OS=HomosapiensGN=RPS20PE=1SV=1;tr|E5RJX2|E5RJX2_HUMAN40SribosomalproteinS20OS=HomosapiensGN=RPS20PE=1SV=1;tr|G3XAN0|G3XAN0_HUMAN40SribosomalproteinS20OS=HomosapiensGN=RPS20PE=1SV=1	sp|P60866|RS20_HUMAN40SribosomalproteinS20OS=HomosapiensGN=RPS20PE=1SV=1;tr|E5RIP1|E5RIP1_HUMAN40SribosomalproteinS20OS=HomosapiensGN=RPS20PE=1SV=1;tr|E5RJX2|E5RJX2_HUMAN40SribosomalproteinS20OS=HomosapiensGN=RPS20PE=1SV=1;tr|G3XAN0|G3XAN0_HUMAN40SribosomalproteinS20OS=HomosapiensGN=RPS20PE=1SV=1	53.7785	0	0	1284900	0	0	3854700	69100000	0	0	2;1;1;1	2;1;1;1	2;1;1;1	;;;	4	2	2	2	1	1	2	2	0	0	1	1	2	2	0	0	1	1	2	2	0	0	19.3	19.3	19.3	13.373	119	119;46;61;64	0	90.752	9.2	9.2	19.3	19.3
sp|P46821|MAP1B_HUMANMicrotubule-associatedprotein1BOS=HomosapiensGN=MAP1BPE=1SV=2	sp|P46821|MAP1B_HUMANMicrotubule-associatedprotein1BOS=HomosapiensGN=MAP1BPE=1SV=2	0	0	0	1.26777e+06	0	0	3803300	0	0	0	4	4	4		1	4	4	4	0	2	3	0	0	0	0	2	3	0	0	0	0	2	3	0	0	0	2.2	2.2	2.2	270.63	2468	2468	0	25.108	0	1.1	1.7	0
sp|Q86YZ3|HORN_HUMANHornerinOS=HomosapiensGN=HRNRPE=1SV=2;CON__Q86YZ3	sp|Q86YZ3|HORN_HUMANHornerinOS=HomosapiensGN=HRNRPE=1SV=2;CON__Q86YZ3	0	0	0	1258200	0	3774600	0	0	0	0	1;1	1;1	1;1	;	2	1	1	1	0	1	0	0	0	0	0	1	0	0	0	0	0	1	0	0	0	0	1.7	1.7	1.7	282.39	2850	2850;2850	0	12.718	0	1.7	0	0
tr|K7EMY3|K7EMY3_HUMANChromodomain-helicase-DNA-bindingprotein5(Fragment)OS=HomosapiensGN=CHD5PE=1SV=1;tr|F5GWX5|F5GWX5_HUMANChromodomain-helicase-DNA-bindingprotein4OS=HomosapiensGN=CHD4PE=1SV=1;sp|Q14839|CHD4_HUMANChromodomain-helicase-DNA-bindingprotein4OS=HomosapiensGN=CHD4PE=1SV=2;tr|A0A0C4DGG9|A0A0C4DGG9_HUMANChromodomain-helicase-DNA-bindingprotein4OS=HomosapiensGN=CHD4PE=1SV=1;sp|Q8TDI0|C…	tr|K7EMY3|K7EMY3_HUMANChromodomain-helicase-DNA-bindingprotein5(Fragment)OS=HomosapiensGN=CHD5PE=1SV=1;tr|F5GWX5|F5GWX5_HUMANChromodomain-helicase-DNA-bindingprotein4OS=HomosapiensGN=CHD4PE=1SV=1;sp|Q14839|CHD4_HUMANChromodomain-helicase-DNA-bindingprotein4OS=HomosapiensGN=CHD4PE=1SV=2;tr|A0A0C4DGG9|A0A0C4DGG9_HUMANChromodomain-helicase-DNA-bindingprotein4OS=HomosapiensGN=CHD4PE=1SV=1;sp|Q8TDI0|C…	0	0	0	1.23967e+06	0	0	3719000	0	0	0	2;2;2;2;2;1	2;2;2;2;2;1	2;2;2;2;2;1	;;;;;	6	2	2	2	0	0	2	0	0	0	0	0	2	0	0	0	0	0	2	0	0	0	2.4	2.4	2.4	120.87	1060	1060;1905;1912;1937;1954;1225	0	12.267	0	0	2.4	0
tr|C9JEV9|C9JEV9_HUMANCleavageandpolyadenylation-specificityfactorsubunit4OS=HomosapiensGN=CPSF4PE=1SV=1;sp|O95639|CPSF4_HUMANCleavageandpolyadenylationspecificityfactorsubunit4OS=HomosapiensGN=CPSF4PE=1SV=1	tr|C9JEV9|C9JEV9_HUMANCleavageandpolyadenylation-specificityfactorsubunit4OS=HomosapiensGN=CPSF4PE=1SV=1;sp|O95639|CPSF4_HUMANCleavageandpolyadenylationspecificityfactorsubunit4OS=HomosapiensGN=CPSF4PE=1SV=1	0	0	0	1.21147e+06	3634400	0	0	0	0	0	1;1	1;1	1;1	;	2	1	1	1	1	0	0	0	0	0	1	0	0	0	0	0	1	0	0	0	0	0	5.7	5.7	5.7	23.653	211	211;269	0.0021322	6.5382	5.7	0	0	0
sp|O94776|MTA2_HUMANMetastasis-associatedproteinMTA2OS=HomosapiensGN=MTA2PE=1SV=1	sp|O94776|MTA2_HUMANMetastasis-associatedproteinMTA2OS=HomosapiensGN=MTA2PE=1SV=1	0	0	0	1.17727e+06	0	0	3531800	0	0	0	7	6	6		1	7	6	6	0	4	3	2	0	0	0	3	3	2	0	0	0	3	3	2	0	0	11.7	10.2	10.2	75.022	668	668	0	36.36	0	7	5.1	2.8
tr|B4DJ81|B4DJ81_HUMANNADH-ubiquinoneoxidoreductase75kDasubunit,mitochondrialOS=HomosapiensGN=NDUFS1PE=1SV=1;sp|P28331|NDUS1_HUMANNADH-ubiquinoneoxidoreductase75kDasubunit,mitochondrialOS=HomosapiensGN=NDUFS1PE=1SV=3	tr|B4DJ81|B4DJ81_HUMANNADH-ubiquinoneoxidoreductase75kDasubunit,mitochondrialOS=HomosapiensGN=NDUFS1PE=1SV=1;sp|P28331|NDUS1_HUMANNADH-ubiquinoneoxidoreductase75kDasubunit,mitochondrialOS=HomosapiensGN=NDUFS1PE=1SV=3	0	0	0	1.16797e+06	3503900	0	0	0	0	0	1;1	1;1	1;1	;	2	1	1	1	1	0	0	0	0	0	1	0	0	0	0	0	1	0	0	0	0	0	4.3	4.3	4.3	66.921	611	611;727	0	6.9583	4.3	0	0	0
tr|A0A087WVS8|A0A087WVS8_HUMANMOBkinaseactivator2OS=HomosapiensGN=MOB2PE=1SV=1;sp|Q70IA6|MOB2_HUMANMOBkinaseactivator2OS=HomosapiensGN=MOB2PE=1SV=1	tr|A0A087WVS8|A0A087WVS8_HUMANMOBkinaseactivator2OS=HomosapiensGN=MOB2PE=1SV=1;sp|Q70IA6|MOB2_HUMANMOBkinaseactivator2OS=HomosapiensGN=MOB2PE=1SV=1	0	0	0	1.11507e+06	0	0	3345200	0	0	0	1;1	1;1	1;1	;	2	1	1	1	0	0	1	0	0	0	0	0	1	0	0	0	0	0	1	0	0	0	4.7	4.7	4.7	26.879	236	236;237	0	6.9357	0	0	4.7	0
sp|P09234|RU1C_HUMANU1smallnuclearribonucleoproteinCOS=HomosapiensGN=SNRPCPE=1SV=1;tr|A0A0A0MRR7|A0A0A0MRR7_HUMANU1smallnuclearribonucleoproteinCOS=HomosapiensGN=SNRPCPE=1SV=1	sp|P09234|RU1C_HUMANU1smallnuclearribonucleoproteinCOS=HomosapiensGN=SNRPCPE=1SV=1;tr|A0A0A0MRR7|A0A0A0MRR7_HUMANU1smallnuclearribonucleoproteinCOS=HomosapiensGN=SNRPCPE=1SV=1	0	0	0	1107700	0	0	3323100	0	0	0	1;1	1;1	1;1	;	2	1	1	1	0	0	1	0	0	0	0	0	1	0	0	0	0	0	1	0	0	0	7.5	7.5	7.5	17.394	159	159;180	0	7.2665	0	0	7.5	0
tr|H0YAV9|H0YAV9_HUMANCCR4-NOTtranscriptioncomplexsubunit7(Fragment)OS=HomosapiensGN=CNOT7PE=1SV=1;sp|Q9UIV1|CNOT7_HUMANCCR4-NOTtranscriptioncomplexsubunit7OS=HomosapiensGN=CNOT7PE=1SV=3;tr|H0YBT3|H0YBT3_HUMANCCR4-NOTtranscriptioncomplexsubunit7(Fragment)OS=HomosapiensGN=CNOT7PE=1SV=1;tr|E5RGH2|E5RGH2_HUMANCCR4-NOTtranscriptioncomplexsubunit7(Fragment)OS=HomosapiensGN=CNOT7PE=1SV=1	tr|H0YAV9|H0YAV9_HUMANCCR4-NOTtranscriptioncomplexsubunit7(Fragment)OS=HomosapiensGN=CNOT7PE=1SV=1;sp|Q9UIV1|CNOT7_HUMANCCR4-NOTtranscriptioncomplexsubunit7OS=HomosapiensGN=CNOT7PE=1SV=3;tr|H0YBT3|H0YBT3_HUMANCCR4-NOTtranscriptioncomplexsubunit7(Fragment)OS=HomosapiensGN=CNOT7PE=1SV=1;tr|E5RGH2|E5RGH2_HUMANCCR4-NOTtranscriptioncomplexsubunit7(Fragment)OS=HomosapiensGN=CNOT7PE=1SV=1	0	0	0	1100800	3302400	0	0	0	0	0	2;2;1;1	2;2;1;1	2;2;1;1	;;;	4	2	2	2	1	0	0	0	1	1	1	0	0	0	1	1	1	0	0	0	1	1	10.1	10.1	10.1	24.13	208	208;285;91;147	0	12.793	5.3	0	0	0
tr|H0YMF9|H0YMF9_HUMANWDrepeat-containingprotein61OS=HomosapiensGN=WDR61PE=1SV=1;tr|H0YN81|H0YN81_HUMANWDrepeat-containingprotein61(Fragment)OS=HomosapiensGN=WDR61PE=1SV=1;sp|Q9GZS3|WDR61_HUMANWDrepeat-containingprotein61OS=HomosapiensGN=WDR61PE=1SV=1;tr|H0YM76|H0YM76_HUMANWDrepeat-containingprotein61OS=HomosapiensGN=WDR61PE=1SV=1;tr|H3BQA8|H3BQA8_HUMANWDrepeat-containingprotein61(Fragment)OS=Hom…	tr|H0YMF9|H0YMF9_HUMANWDrepeat-containingprotein61OS=HomosapiensGN=WDR61PE=1SV=1;tr|H0YN81|H0YN81_HUMANWDrepeat-containingprotein61(Fragment)OS=HomosapiensGN=WDR61PE=1SV=1;sp|Q9GZS3|WDR61_HUMANWDrepeat-containingprotein61OS=HomosapiensGN=WDR61PE=1SV=1;tr|H0YM76|H0YM76_HUMANWDrepeat-containingprotein61OS=HomosapiensGN=WDR61PE=1SV=1;tr|H3BQA8|H3BQA8_HUMANWDrepeat-containingprotein61(Fragment)OS=Hom…	0	0	0	1.09193e+06	3275800	0	0	0	0	0	2;2;2;1;1;1	2;2;2;1;1;1	2;2;2;1;1;1	;;;;;	6	2	2	2	2	0	0	0	0	0	2	0	0	0	0	0	2	0	0	0	0	0	14.8	14.8	14.8	20.743	189	189;294;305;48;163;212	0	12.057	14.8	0	0	0
tr|N0DVX5|N0DVX5_HUMANDBF4-typezincfinger-containingprotein2OS=HomosapiensGN=ZDBF2PE=1SV=1;sp|Q9HCK1|ZDBF2_HUMANDBF4-typezincfinger-containingprotein2OS=HomosapiensGN=ZDBF2PE=1SV=3	tr|N0DVX5|N0DVX5_HUMANDBF4-typezincfinger-containingprotein2OS=HomosapiensGN=ZDBF2PE=1SV=1;sp|Q9HCK1|ZDBF2_HUMANDBF4-typezincfinger-containingprotein2OS=HomosapiensGN=ZDBF2PE=1SV=3	0	0	0	1.08597e+06	0	3257900	0	0	0	0	7;7	7;7	7;7	;	2	7	7	7	0	4	4	0	0	0	0	4	4	0	0	0	0	4	4	0	0	0	3.9	3.9	3.9	265.05	2352	2352;2354	0	44.135	0	2.5	2.7	0
sp|Q9Y5M8|SRPRB_HUMANSignalrecognitionparticlereceptorsubunitbetaOS=HomosapiensGN=SRPRBPE=1SV=3;tr|H7C4H2|H7C4H2_HUMANSignalrecognitionparticlereceptorsubunitbeta(Fragment)OS=HomosapiensGN=SRPRBPE=1SV=1	sp|Q9Y5M8|SRPRB_HUMANSignalrecognitionparticlereceptorsubunitbetaOS=HomosapiensGN=SRPRBPE=1SV=3;tr|H7C4H2|H7C4H2_HUMANSignalrecognitionparticlereceptorsubunitbeta(Fragment)OS=HomosapiensGN=SRPRBPE=1SV=1	0	0	0	1.08087e+06	3242600	0	0	0	0	0	2;1	2;1	2;1	;	2	2	2	2	2	0	0	0	0	0	2	0	0	0	0	0	2	0	0	0	0	0	10.7	10.7	10.7	29.702	271	271;160	0	11.797	10.7	0	0	0
sp|Q15365|PCBP1_HUMANPoly(rC)-bindingprotein1OS=HomosapiensGN=PCBP1PE=1SV=2	sp|Q15365|PCBP1_HUMANPoly(rC)-bindingprotein1OS=HomosapiensGN=PCBP1PE=1SV=2	0	0	0	1079400	0	0	3238200	0	0	0	3	2	2		1	3	2	2	0	0	2	1	2	2	0	0	2	0	1	1	0	0	2	0	1	1	15.2	9.6	9.6	37.497	356	356	0	12.443	0	0	9.6	5.6
sp|P06730|IF4E_HUMANEukaryotictranslationinitiationfactor4EOS=HomosapiensGN=EIF4EPE=1SV=2;tr|D6RBW1|D6RBW1_HUMANEukaryotictranslationinitiationfactor4EOS=HomosapiensGN=EIF4EPE=1SV=1	sp|P06730|IF4E_HUMANEukaryotictranslationinitiationfactor4EOS=HomosapiensGN=EIF4EPE=1SV=2;tr|D6RBW1|D6RBW1_HUMANEukaryotictranslationinitiationfactor4EOS=HomosapiensGN=EIF4EPE=1SV=1	0	0	0	1064400	3193200	0	0	0	0	0	1;1	1;1	1;1	;	2	1	1	1	1	0	0	0	0	0	1	0	0	0	0	0	1	0	0	0	0	0	6.5	6.5	6.5	25.097	217	217;245	0	7.0889	6.5	0	0	0
tr|H0YNU5|H0YNU5_HUMANBloomsyndromeproteinOS=HomosapiensGN=BLMPE=1SV=1;sp|P54132|BLM_HUMANBloomsyndromeproteinOS=HomosapiensGN=BLMPE=1SV=1	tr|H0YNU5|H0YNU5_HUMANBloomsyndromeproteinOS=HomosapiensGN=BLMPE=1SV=1;sp|P54132|BLM_HUMANBloomsyndromeproteinOS=HomosapiensGN=BLMPE=1SV=1	0	0	0	1.05507e+06	0	3165200	0	0	0	0	3;3	3;3	3;3	;	2	3	3	3	0	2	2	0	0	0	0	2	2	0	0	0	0	2	2	0	0	0	2.6	2.6	2.6	144.47	1286	1286;1417	0	19.277	0	1.8	1.8	0
sp|P15924|DESP_HUMANDesmoplakinOS=HomosapiensGN=DSPPE=1SV=3	sp|P15924|DESP_HUMANDesmoplakinOS=HomosapiensGN=DSPPE=1SV=3	0	0	0	1.03277e+06	0	3098300	0	0	0	0	5	5	5		1	5	5	5	0	5	1	0	0	0	0	5	1	0	0	0	0	5	1	0	0	0	1.8	1.8	1.8	331.77	2871	2871	0	33.888	0	1.8	0.5	0
tr|F5H2X1|F5H2X1_HUMANUbiquitincarboxyl-terminalhydrolaseOS=HomosapiensGN=USP7PE=1SV=1;tr|H3BND8|H3BND8_HUMANUbiquitincarboxyl-terminalhydrolase(Fragment)OS=HomosapiensGN=USP7PE=1SV=1;sp|Q93009|UBP7_HUMANUbiquitincarboxyl-terminalhydrolase7OS=HomosapiensGN=USP7PE=1SV=2	tr|F5H2X1|F5H2X1_HUMANUbiquitincarboxyl-terminalhydrolaseOS=HomosapiensGN=USP7PE=1SV=1;tr|H3BND8|H3BND8_HUMANUbiquitincarboxyl-terminalhydrolase(Fragment)OS=HomosapiensGN=USP7PE=1SV=1;sp|Q93009|UBP7_HUMANUbiquitincarboxyl-terminalhydrolase7OS=HomosapiensGN=USP7PE=1SV=2	0	0	0	1020300	0	0	3060900	0	0	0	2;2;2	2;2;2	2;2;2	;;	3	2	2	2	0	0	2	0	0	0	0	0	2	0	0	0	0	0	2	0	0	0	6.5	6.5	6.5	58.566	509	509;909;1102	0	12.546	0	0	6.5	0
tr|F8W079|F8W079_HUMANATPsynthasesubunitbeta,mitochondrial(Fragment)OS=HomosapiensGN=ATP5BPE=1SV=1;sp|P06576|ATPB_HUMANATPsynthasesubunitbeta,mitochondrialOS=HomosapiensGN=ATP5BPE=1SV=3	tr|F8W079|F8W079_HUMANATPsynthasesubunitbeta,mitochondrial(Fragment)OS=HomosapiensGN=ATP5BPE=1SV=1;sp|P06576|ATPB_HUMANATPsynthasesubunitbeta,mitochondrialOS=HomosapiensGN=ATP5BPE=1SV=3	0	0	0	1.01627e+06	3048800	0	0	0	0	0	1;1	1;1	1;1	;	2	1	1	1	1	0	0	0	0	0	1	0	0	0	0	0	1	0	0	0	0	0	8.5	8.5	8.5	30.17	284	284;529	0	12.858	8.5	0	0	0
sp|P19105|ML12A_HUMANMyosinregulatorylightchain12AOS=HomosapiensGN=MYL12APE=1SV=2;sp|O14950|ML12B_HUMANMyosinregulatorylightchain12BOS=HomosapiensGN=MYL12BPE=1SV=2;tr|J3QRS3|J3QRS3_HUMANMyosinregulatorylightchain12AOS=HomosapiensGN=MYL12APE=1SV=1;tr|J3KTJ1|J3KTJ1_HUMANMyosinregulatorylightchain12A(Fragment)OS=HomosapiensGN=MYL12APE=1SV=1;sp|P24844|MYL9_HUMANMyosinregulatorylightpolypeptide9OS=Hom…	sp|P19105|ML12A_HUMANMyosinregulatorylightchain12AOS=HomosapiensGN=MYL12APE=1SV=2;sp|O14950|ML12B_HUMANMyosinregulatorylightchain12BOS=HomosapiensGN=MYL12BPE=1SV=2;tr|J3QRS3|J3QRS3_HUMANMyosinregulatorylightchain12AOS=HomosapiensGN=MYL12APE=1SV=1;tr|J3KTJ1|J3KTJ1_HUMANMyosinregulatorylightchain12A(Fragment)OS=HomosapiensGN=MYL12APE=1SV=1;sp|P24844|MYL9_HUMANMyosinregulatorylightpolypeptide9OS=Hom…	0	0	0	990267	0	2970800	0	0	0	0	3;3;3;2;2	3;3;3;2;2	3;3;3;2;2	;;;;	5	3	3	3	0	3	1	0	0	0	0	3	1	0	0	0	0	3	1	0	0	0	23.4	23.4	23.4	19.794	171	171;172;177;114;172	0	19.638	0	23.4	6.4	0
tr|A0A087WX29|A0A087WX29_HUMANTARDNA-bindingprotein43(Fragment)OS=HomosapiensGN=TARDBPPE=1SV=1;sp|Q13148|TADBP_HUMANTARDNA-bindingprotein43OS=HomosapiensGN=TARDBPPE=1SV=1;tr|A0A087WXQ5|A0A087WXQ5_HUMANTARDNA-bindingprotein43(Fragment)OS=HomosapiensGN=TARDBPPE=1SV=1;tr|A0A087WV68|A0A087WV68_HUMANTARDNA-bindingprotein43(Fragment)OS=HomosapiensGN=TARDBPPE=1SV=1;tr|B1AKP7|B1AKP7_HUMANTARDNA-bindingpr…	tr|A0A087WX29|A0A087WX29_HUMANTARDNA-bindingprotein43(Fragment)OS=HomosapiensGN=TARDBPPE=1SV=1;sp|Q13148|TADBP_HUMANTARDNA-bindingprotein43OS=HomosapiensGN=TARDBPPE=1SV=1;tr|A0A087WXQ5|A0A087WXQ5_HUMANTARDNA-bindingprotein43(Fragment)OS=HomosapiensGN=TARDBPPE=1SV=1;tr|A0A087WV68|A0A087WV68_HUMANTARDNA-bindingprotein43(Fragment)OS=HomosapiensGN=TARDBPPE=1SV=1;tr|B1AKP7|B1AKP7_HUMANTARDNA-bindingpr…	0	0	0	989433	0	2968300	0	0	0	0	3;3;2;2;2;2;2;2;1;1;1;1;1;1;1;1;1	3;3;2;2;2;2;2;2;1;1;1;1;1;1;1;1;1	3;3;2;2;2;2;2;2;1;1;1;1;1;1;1;1;1	;;;;;;;	17	3	3	3	0	3	1	0	1	1	0	3	1	0	1	1	0	3	1	0	1	1	17.3	17.3	17.3	26.743	243	243;414;200;212;295;298;301;304;61;65;89;127;138;149;175;201;276	0	52.336	0	17.3	4.9	0
tr|A0A0A0MS51|A0A0A0MS51_HUMANGelsolinOS=HomosapiensGN=GSNPE=1SV=1;tr|A0A0A0MT01|A0A0A0MT01_HUMANGelsolinOS=HomosapiensGN=GSNPE=1SV=1;CON__Q3SX14;sp|P06396|GELS_HUMANGelsolinOS=HomosapiensGN=GSNPE=1SV=1;tr|Q5T0H8|Q5T0H8_HUMANGelsolinOS=HomosapiensGN=GSNPE=1SV=1;tr|Q5T0I1|Q5T0I1_HUMANGelsolin(Fragment)OS=HomosapiensGN=GSNPE=1SV=1;tr|Q5T0I0|Q5T0I0_HUMANGelsolin(Fragment)OS=HomosapiensGN=GSNPE=1SV=1…	tr|A0A0A0MS51|A0A0A0MS51_HUMANGelsolinOS=HomosapiensGN=GSNPE=1SV=1;tr|A0A0A0MT01|A0A0A0MT01_HUMANGelsolinOS=HomosapiensGN=GSNPE=1SV=1;CON__Q3SX14;sp|P06396|GELS_HUMANGelsolinOS=HomosapiensGN=GSNPE=1SV=1;tr|Q5T0H8|Q5T0H8_HUMANGelsolinOS=HomosapiensGN=GSNPE=1SV=1;tr|Q5T0I1|Q5T0I1_HUMANGelsolin(Fragment)OS=HomosapiensGN=GSNPE=1SV=1;tr|Q5T0I0|Q5T0I0_HUMANGelsolin(Fragment)OS=HomosapiensGN=GSNPE=1SV=1…	0	0	0	968800	0	2906400	0	0	0	0	2;2;2;2;1;1;1;1	2;2;2;2;1;1;1;1	2;2;2;2;1;1;1;1	;;;;;;;	8	2	2	2	0	2	1	0	0	0	0	2	1	0	0	0	0	2	1	0	0	0	3.2	3.2	3.2	82.525	748	748;767;781;782;207;228;260;485	0	13.818	0	3.2	1.5	0
sp|O60825|F262_HUMAN6-phosphofructo-2-kinase/fructose-2,6-bisphosphatase2OS=HomosapiensGN=PFKFB2PE=1SV=2;tr|F6RAZ1|F6RAZ1_HUMAN6-phosphofructo-2-kinase/fructose-2,6-bisphosphatase2(Fragment)OS=HomosapiensGN=PFKFB2PE=1SV=1	sp|O60825|F262_HUMAN6-phosphofructo-2-kinase/fructose-2,6-bisphosphatase2OS=HomosapiensGN=PFKFB2PE=1SV=2	0	0	0	959900	0	2879700	0	0	0	0	5;2	4;1	4;1		2	5	4	4	0	4	3	0	0	0	0	3	2	0	0	0	0	3	2	0	0	0	10.7	8.7	8.7	58.476	505	505;125	0	25.273	0	9.1	6.1	0
sp|P12270|TPR_HUMANNucleoproteinTPROS=HomosapiensGN=TPRPE=1SV=3	sp|P12270|TPR_HUMANNucleoproteinTPROS=HomosapiensGN=TPRPE=1SV=3	0	0	0	939167	0	0	2817500	0	0	0	4	4	4		1	4	4	4	0	0	4	0	0	0	0	0	4	0	0	0	0	0	4	0	0	0	1.9	1.9	1.9	267.29	2363	2363	0	26.045	0	0	1.9	0
tr|G3V198|G3V198_HUMANNuclearporecomplexproteinNup160(Fragment)OS=HomosapiensGN=NUP160PE=1SV=2;sp|Q12769|NU160_HUMANNuclearporecomplexproteinNup160OS=HomosapiensGN=NUP160PE=1SV=3;tr|E9PR16|E9PR16_HUMANNuclearporecomplexproteinNup160(Fragment)OS=HomosapiensGN=NUP160PE=1SV=2	tr|G3V198|G3V198_HUMANNuclearporecomplexproteinNup160(Fragment)OS=HomosapiensGN=NUP160PE=1SV=2;sp|Q12769|NU160_HUMANNuclearporecomplexproteinNup160OS=HomosapiensGN=NUP160PE=1SV=3;tr|E9PR16|E9PR16_HUMANNuclearporecomplexproteinNup160(Fragment)OS=HomosapiensGN=NUP160PE=1SV=2	0	0	0	936900	0	0	2810700	0	0	0	2;2;1	2;2;1	2;2;1	;;	3	2	2	2	0	1	2	0	0	0	0	1	2	0	0	0	0	1	2	0	0	0	1.9	1.9	1.9	148.86	1314	1314;1436;1123	0	12.616	0	0.9	1.9	0
sp|P30041|PRDX6_HUMANPeroxiredoxin-6OS=HomosapiensGN=PRDX6PE=1SV=3	sp|P30041|PRDX6_HUMANPeroxiredoxin-6OS=HomosapiensGN=PRDX6PE=1SV=3	0	0	0	929267	0	0	2787800	0	0	0	3	3	3		1	3	3	3	0	1	2	0	0	0	0	1	2	0	0	0	0	1	2	0	0	0	17.9	17.9	17.9	25.035	224	224	0	16.593	0	4	13.8	0
sp|P04406|G3P_HUMANGlyceraldehyde-3-phosphatedehydrogenaseOS=HomosapiensGN=GAPDHPE=1SV=3;tr|E7EUT5|E7EUT5_HUMANGlyceraldehyde-3-phosphatedehydrogenaseOS=HomosapiensGN=GAPDHPE=1SV=1	sp|P04406|G3P_HUMANGlyceraldehyde-3-phosphatedehydrogenaseOS=HomosapiensGN=GAPDHPE=1SV=3;tr|E7EUT5|E7EUT5_HUMANGlyceraldehyde-3-phosphatedehydrogenaseOS=HomosapiensGN=GAPDHPE=1SV=1	0	0	0	908433	0	0	2725300	0	0	0	2;1	2;1	2;1	;	2	2	2	2	0	1	2	0	0	0	0	1	2	0	0	0	0	1	2	0	0	0	9.9	9.9	9.9	36.053	335	335;260	0	12.666	0	4.5	9.9	0
sp|P25705|ATPA_HUMANATPsynthasesubunitalpha,mitochondrialOS=HomosapiensGN=ATP5A1PE=1SV=1	sp|P25705|ATPA_HUMANATPsynthasesubunitalpha,mitochondrialOS=HomosapiensGN=ATP5A1PE=1SV=1	0	0	0	903733	2711200	0	0	0	0	0	1	1	1		1	1	1	1	1	0	0	0	0	0	1	0	0	0	0	0	1	0	0	0	0	0	4	4	4	59.75	553	553	0	10.959	4	0	0	0
tr|J3QSX6|J3QSX6_HUMANActin-bindingLIMprotein1OS=HomosapiensGN=ABLIM1PE=1SV=2;tr|F8W8M4|F8W8M4_HUMANActin-bindingLIMprotein1OS=HomosapiensGN=ABLIM1PE=1SV=1;tr|A0A0A0MRL6|A0A0A0MRL6_HUMANActin-bindingLIMprotein1OS=HomosapiensGN=ABLIM1PE=1SV=1;sp|O14639|ABLM1_HUMANActin-bindingLIMprotein1OS=HomosapiensGN=ABLIM1PE=1SV=3;tr|H0Y7N6|H0Y7N6_HUMANActin-bindingLIMprotein1(Fragment)OS=HomosapiensGN=ABLIM1P…	tr|J3QSX6|J3QSX6_HUMANActin-bindingLIMprotein1OS=HomosapiensGN=ABLIM1PE=1SV=2;tr|F8W8M4|F8W8M4_HUMANActin-bindingLIMprotein1OS=HomosapiensGN=ABLIM1PE=1SV=1;tr|A0A0A0MRL6|A0A0A0MRL6_HUMANActin-bindingLIMprotein1OS=HomosapiensGN=ABLIM1PE=1SV=1;sp|O14639|ABLM1_HUMANActin-bindingLIMprotein1OS=HomosapiensGN=ABLIM1PE=1SV=3;tr|H0Y7N6|H0Y7N6_HUMANActin-bindingLIMprotein1(Fragment)OS=HomosapiensGN=ABLIM1P…	0	0	0	884500	0	2653500	0	0	0	0	2;2;2;2;1;1	2;2;2;2;1;1	2;2;2;2;1;1	;;;;;	6	2	2	2	0	2	1	0	0	0	0	2	1	0	0	0	0	2	1	0	0	0	6	6	6	46.07	401	401;718;746;778;172;173	0	13.964	0	6	3.7	0
sp|Q8WUM0|NU133_HUMANNuclearporecomplexproteinNup133OS=HomosapiensGN=NUP133PE=1SV=2	sp|Q8WUM0|NU133_HUMANNuclearporecomplexproteinNup133OS=HomosapiensGN=NUP133PE=1SV=2	0	0	0	870700	0	0	2612100	0	0	0	4	4	4		1	4	4	4	0	1	4	0	0	0	0	1	4	0	0	0	0	1	4	0	0	0	4.9	4.9	4.9	128.98	1156	1156	0	23.446	0	1.4	4.9	0
sp|Q2TAC6|KIF19_HUMANKinesin-likeproteinKIF19OS=HomosapiensGN=KIF19PE=2SV=2	sp|Q2TAC6|KIF19_HUMANKinesin-likeproteinKIF19OS=HomosapiensGN=KIF19PE=2SV=2	0	0	0	845233	0	0	2535700	0	0	0	1	1	1		1	1	1	1	0	1	1	0	0	0	0	1	1	0	0	0	0	1	1	0	0	0	1	1	1	111.33	998	998	1	-2	0	1	1	0
sp|P06702|S10A9_HUMANProteinS100-A9OS=HomosapiensGN=S100A9PE=1SV=1	sp|P06702|S10A9_HUMANProteinS100-A9OS=HomosapiensGN=S100A9PE=1SV=1	0	0	0	833167	0	0	2499500	0	0	0	1	1	1		1	1	1	1	0	1	1	0	0	0	0	1	1	0	0	0	0	1	1	0	0	0	11.4	11.4	11.4	13.242	114	114	0	7.2176	0	11.4	11.4	0
tr|H3BUN0|H3BUN0_HUMANE3ubiquitin-proteinligaseRBBP6(Fragment)OS=HomosapiensGN=RBBP6PE=1SV=1;sp|Q7Z6E9|RBBP6_HUMANE3ubiquitin-proteinligaseRBBP6OS=HomosapiensGN=RBBP6PE=1SV=1;tr|A0A087WY32|A0A087WY32_HUMANE3ubiquitin-proteinligaseRBBP6(Fragment)OS=HomosapiensGN=RBBP6PE=1SV=1;tr|I3L3Y2|I3L3Y2_HUMANE3ubiquitin-proteinligaseRBBP6(Fragment)OS=HomosapiensGN=RBBP6PE=1SV=1;tr|H3BSK8|H3BSK8_HUMANE3ubiqui…	tr|H3BUN0|H3BUN0_HUMANE3ubiquitin-proteinligaseRBBP6(Fragment)OS=HomosapiensGN=RBBP6PE=1SV=1;sp|Q7Z6E9|RBBP6_HUMANE3ubiquitin-proteinligaseRBBP6OS=HomosapiensGN=RBBP6PE=1SV=1;tr|A0A087WY32|A0A087WY32_HUMANE3ubiquitin-proteinligaseRBBP6(Fragment)OS=HomosapiensGN=RBBP6PE=1SV=1;tr|I3L3Y2|I3L3Y2_HUMANE3ubiquitin-proteinligaseRBBP6(Fragment)OS=HomosapiensGN=RBBP6PE=1SV=1;tr|H3BSK8|H3BSK8_HUMANE3ubiqui…	0	0	0	794367	2383100	0	0	0	0	0	2;2;1;1;1	2;2;1;1;1	2;2;1;1;1	;;;;	5	2	2	2	2	0	0	0	0	0	2	0	0	0	0	0	2	0	0	0	0	0	10.3	10.3	10.3	32.969	300	300;1792;138;158;1008	0	11.555	10.3	0	0	0
sp|P50990|TCPQ_HUMANT-complexprotein1subunitthetaOS=HomosapiensGN=CCT8PE=1SV=4;tr|H7C2U0|H7C2U0_HUMANT-complexprotein1subunittheta(Fragment)OS=HomosapiensGN=CCT8PE=1SV=1;tr|H7C4C8|H7C4C8_HUMANT-complexprotein1subunittheta(Fragment)OS=HomosapiensGN=CCT8PE=1SV=1	sp|P50990|TCPQ_HUMANT-complexprotein1subunitthetaOS=HomosapiensGN=CCT8PE=1SV=4;tr|H7C2U0|H7C2U0_HUMANT-complexprotein1subunittheta(Fragment)OS=HomosapiensGN=CCT8PE=1SV=1;tr|H7C4C8|H7C4C8_HUMANT-complexprotein1subunittheta(Fragment)OS=HomosapiensGN=CCT8PE=1SV=1	0	0	0	774567	0	2323700	0	0	0	0	2;1;1	2;1;1	2;1;1	;;	3	2	2	2	0	2	1	0	0	0	0	2	1	0	0	0	0	2	1	0	0	0	4.6	4.6	4.6	59.62	548	548;107;323	0	14.667	0	4.6	2.7	0
tr|H0Y4R1|H0Y4R1_HUMANInosine-5'-monophosphatedehydrogenase2(Fragment)OS=HomosapiensGN=IMPDH2PE=1SV=1;sp|P12268|IMDH2_HUMANInosine-5'-monophosphatedehydrogenase2OS=HomosapiensGN=IMPDH2PE=1SV=2;tr|E7ETK5|E7ETK5_HUMANInosine-5'-monophosphatedehydrogenase2(Fragment)OS=HomosapiensGN=IMPDH2PE=1SV=1	tr|H0Y4R1|H0Y4R1_HUMANInosine-5'-monophosphatedehydrogenase2(Fragment)OS=HomosapiensGN=IMPDH2PE=1SV=1;sp|P12268|IMDH2_HUMANInosine-5'-monophosphatedehydrogenase2OS=HomosapiensGN=IMPDH2PE=1SV=2;tr|E7ETK5|E7ETK5_HUMANInosine-5'-monophosphatedehydrogenase2(Fragment)OS=HomosapiensGN=IMPDH2PE=1SV=1	0	0	0	757400	0	0	2272200	0	0	0	2;2;1	2;2;1	2;2;1	;;	3	2	2	2	0	0	2	0	0	0	0	0	2	0	0	0	0	0	2	0	0	0	5.5	5.5	5.5	50.957	470	470;514;279	0	11.002	0	0	5.5	0
sp|P46783|RS10_HUMAN40SribosomalproteinS10OS=HomosapiensGN=RPS10PE=1SV=1;tr|F6U211|F6U211_HUMAN40SribosomalproteinS10OS=HomosapiensGN=RPS10PE=4SV=1;tr|S4R435|S4R435_HUMANProteinRPS10-NUDT3(Fragment)OS=HomosapiensGN=RPS10-NUDT3PE=3SV=1	sp|P46783|RS10_HUMAN40SribosomalproteinS10OS=HomosapiensGN=RPS10PE=1SV=1;tr|F6U211|F6U211_HUMAN40SribosomalproteinS10OS=HomosapiensGN=RPS10PE=4SV=1;tr|S4R435|S4R435_HUMANProteinRPS10-NUDT3(Fragment)OS=HomosapiensGN=RPS10-NUDT3PE=3SV=1	0	0	0	747033	0	0	2241100	0	0	0	1;1;1	1;1;1	1;1;1	;;	3	1	1	1	0	1	1	0	0	0	0	1	1	0	0	0	0	1	1	0	0	0	5.5	5.5	5.5	18.898	165	165;172;286	0	6.9256	0	5.5	5.5	0
sp|P62316|SMD2_HUMANSmallnuclearribonucleoproteinSmD2OS=HomosapiensGN=SNRPD2PE=1SV=1;tr|K7ERG4|K7ERG4_HUMANSmallnuclearribonucleoproteinSmD2OS=HomosapiensGN=SNRPD2PE=1SV=1;tr|K7EJB5|K7EJB5_HUMANSmallnuclearribonucleoproteinSmD2OS=HomosapiensGN=SNRPD2PE=1SV=1	sp|P62316|SMD2_HUMANSmallnuclearribonucleoproteinSmD2OS=HomosapiensGN=SNRPD2PE=1SV=1;tr|K7ERG4|K7ERG4_HUMANSmallnuclearribonucleoproteinSmD2OS=HomosapiensGN=SNRPD2PE=1SV=1	0	0	0	725267	0	2175800	0	0	0	0	3;2;1	3;2;1	3;2;1	;	3	3	3	3	0	2	2	0	0	0	0	2	2	0	0	0	0	2	2	0	0	0	28.8	28.8	28.8	13.527	118	118;78;54	0	18.995	0	22	12.7	0
sp|O94906|PRP6_HUMANPre-mRNA-processingfactor6OS=HomosapiensGN=PRPF6PE=1SV=1	sp|O94906|PRP6_HUMANPre-mRNA-processingfactor6OS=HomosapiensGN=PRPF6PE=1SV=1	0	0	0	718767	0	0	2156300	0	0	0	4	4	4		1	4	4	4	0	1	3	0	0	0	0	1	3	0	0	0	0	1	3	0	0	0	4.6	4.6	4.6	106.92	941	941	0	23.133	0	1.5	3.1	0
sp|P26641|EF1G_HUMANElongationfactor1-gammaOS=HomosapiensGN=EEF1GPE=1SV=3	sp|P26641|EF1G_HUMANElongationfactor1-gammaOS=HomosapiensGN=EEF1GPE=1SV=3	0	0	0	713900	0	1013700	1128000	0	0	0	2	2	2		1	2	2	2	0	2	2	0	0	0	0	2	2	0	0	0	0	2	2	0	0	0	5.9	5.9	5.9	50.118	437	437	0	11.744	0	5.9	5.9	0
sp|Q5JUX0|SPIN3_HUMANSpindlin-3OS=HomosapiensGN=SPIN3PE=1SV=1	sp|Q5JUX0|SPIN3_HUMANSpindlin-3OS=HomosapiensGN=SPIN3PE=1SV=1	0	0	0	707233	0	0	2121700	0	0	0	5	1	1		1	5	1	1	3	3	5	0	1	1	0	1	1	0	0	0	0	1	1	0	0	0	22.9	3.9	3.9	29.207	258	258	0.0020161	6.3382	16.3	14.7	22.9	0
tr|H7C218|H7C218_HUMANProbableserinecarboxypeptidaseCPVL(Fragment)OS=HomosapiensGN=CPVLPE=1SV=1;tr|H7C0X5|H7C0X5_HUMANProbableserinecarboxypeptidaseCPVL(Fragment)OS=HomosapiensGN=CPVLPE=1SV=1;sp|Q9H3G5|CPVL_HUMANProbableserinecarboxypeptidaseCPVLOS=HomosapiensGN=CPVLPE=1SV=2	tr|H7C218|H7C218_HUMANProbableserinecarboxypeptidaseCPVL(Fragment)OS=HomosapiensGN=CPVLPE=1SV=1;tr|H7C0X5|H7C0X5_HUMANProbableserinecarboxypeptidaseCPVL(Fragment)OS=HomosapiensGN=CPVLPE=1SV=1;sp|Q9H3G5|CPVL_HUMANProbableserinecarboxypeptidaseCPVLOS=HomosapiensGN=CPVLPE=1SV=2	0	0	0	697133	2091400	0	0	0	0	0	2;2;2	2;2;2	2;2;2	;;	3	2	2	2	1	0	1	0	0	0	1	0	1	0	0	0	1	0	1	0	0	0	16.3	16.3	16.3	16.486	141	141;180;476	0	12.095	7.1	0	9.2	0
sp|O75586|MED6_HUMANMediatorofRNApolymeraseIItranscriptionsubunit6OS=HomosapiensGN=MED6PE=1SV=2;tr|G3V4A5|G3V4A5_HUMANMediatorofRNApolymeraseIItranscriptionsubunit6OS=HomosapiensGN=MED6PE=1SV=1;tr|A0A087WYL7|A0A087WYL7_HUMANMediatorofRNApolymeraseIItranscriptionsubunit6OS=HomosapiensGN=MED6PE=1SV=1	sp|O75586|MED6_HUMANMediatorofRNApolymeraseIItranscriptionsubunit6OS=HomosapiensGN=MED6PE=1SV=2;tr|G3V4A5|G3V4A5_HUMANMediatorofRNApolymeraseIItranscriptionsubunit6OS=HomosapiensGN=MED6PE=1SV=1;tr|A0A087WYL7|A0A087WYL7_HUMANMediatorofRNApolymeraseIItranscriptionsubunit6OS=HomosapiensGN=MED6PE=1SV=1	0	0	0	663200	1989600	0	0	0	0	0	1;1;1	1;1;1	1;1;1	;;	3	1	1	1	1	0	0	0	0	0	1	0	0	0	0	0	1	0	0	0	0	0	3.7	3.7	3.7	28.424	246	246;249;257	0.0039526	6.2525	3.7	0	0	0
tr|E7EQG2|E7EQG2_HUMANEukaryoticinitiationfactor4A-IIOS=HomosapiensGN=EIF4A2PE=1SV=1;sp|P60842|IF4A1_HUMANEukaryoticinitiationfactor4A-IOS=HomosapiensGN=EIF4A1PE=1SV=1;sp|Q14240|IF4A2_HUMANEukaryoticinitiationfactor4A-IIOS=HomosapiensGN=EIF4A2PE=1SV=2;tr|J3KT04|J3KT04_HUMANEukaryoticinitiationfactor4A-I(Fragment)OS=HomosapiensGN=EIF4A1PE=1SV=1;tr|J3KS93|J3KS93_HUMANEukaryoticinitiationfactor4A-I(…	tr|E7EQG2|E7EQG2_HUMANEukaryoticinitiationfactor4A-IIOS=HomosapiensGN=EIF4A2PE=1SV=1;sp|P60842|IF4A1_HUMANEukaryoticinitiationfactor4A-IOS=HomosapiensGN=EIF4A1PE=1SV=1;sp|Q14240|IF4A2_HUMANEukaryoticinitiationfactor4A-IIOS=HomosapiensGN=EIF4A2PE=1SV=2;tr|J3KT04|J3KT04_HUMANEukaryoticinitiationfactor4A-I(Fragment)OS=HomosapiensGN=EIF4A1PE=1SV=1;tr|J3KS93|J3KS93_HUMANEukaryoticinitiationfactor4A-I(…	0	0	0	657367	0	0	1972100	0	0	0	3;3;3;2;2;2;2;2;2;2;2;2;2;2;2	2;2;2;1;1;1;1;1;1;1;1;1;1;1;1	2;2;2;1;1;1;1;1;1;1;1;1;1;1;1	;;;;;;;;;;;;;;	15	3	2	2	0	1	2	0	1	1	0	1	2	0	0	0	0	1	2	0	0	0	11	6.6	6.6	41.29	362	362;406;407;85;85;98;109;135;163;188;214;257;271;300;341	0	14.6	0	3.9	6.6	0
sp|Q14974|IMB1_HUMANImportinsubunitbeta-1OS=HomosapiensGN=KPNB1PE=1SV=2;tr|J3QR48|J3QR48_HUMANImportinsubunitbeta-1(Fragment)OS=HomosapiensGN=KPNB1PE=1SV=5;tr|J3KTM9|J3KTM9_HUMANImportinsubunitbeta-1(Fragment)OS=HomosapiensGN=KPNB1PE=1SV=1	sp|Q14974|IMB1_HUMANImportinsubunitbeta-1OS=HomosapiensGN=KPNB1PE=1SV=2;tr|J3QR48|J3QR48_HUMANImportinsubunitbeta-1(Fragment)OS=HomosapiensGN=KPNB1PE=1SV=5;tr|J3KTM9|J3KTM9_HUMANImportinsubunitbeta-1(Fragment)OS=HomosapiensGN=KPNB1PE=1SV=1	0	0	0	656000	0	1968000	0	0	0	0	4;2;2	4;2;2	4;2;2	;;	3	4	4	4	0	3	1	0	0	0	0	3	1	0	0	0	0	3	1	0	0	0	6.8	6.8	6.8	97.169	876	876;149;690	0	23.541	0	5	1.8	0
sp|P49411|EFTU_HUMANElongationfactorTu,mitochondrialOS=HomosapiensGN=TUFMPE=1SV=2	sp|P49411|EFTU_HUMANElongationfactorTu,mitochondrialOS=HomosapiensGN=TUFMPE=1SV=2	0	0	0	652800	0	0	1958400	0	0	0	3	3	3		1	3	3	3	0	1	2	0	1	0	0	1	2	0	1	0	0	1	2	0	1	0	10	10	10	49.541	452	452	0	21.852	0	4.2	6.9	0
sp|Q01804|OTUD4_HUMANOTUdomain-containingprotein4OS=HomosapiensGN=OTUD4PE=1SV=4	sp|Q01804|OTUD4_HUMANOTUdomain-containingprotein4OS=HomosapiensGN=OTUD4PE=1SV=4	0	0	0	648633	0	0	1945900	0	0	0	2	2	2		1	2	2	2	0	1	2	0	0	0	0	1	2	0	0	0	0	1	2	0	0	0	2.8	2.8	2.8	124.04	1114	1114	0	13.5	0	1.1	2.8	0
sp|P82979|SARNP_HUMANSAPdomain-containingribonucleoproteinOS=HomosapiensGN=SARNPPE=1SV=3;tr|F8VZQ9|F8VZQ9_HUMANSAPdomain-containingribonucleoproteinOS=HomosapiensGN=SARNPPE=1SV=1;tr|H0YHG0|H0YHG0_HUMANUncharacterizedprotein(Fragment)OS=HomosapiensPE=1SV=1	sp|P82979|SARNP_HUMANSAPdomain-containingribonucleoproteinOS=HomosapiensGN=SARNPPE=1SV=3;tr|F8VZQ9|F8VZQ9_HUMANSAPdomain-containingribonucleoproteinOS=HomosapiensGN=SARNPPE=1SV=1;tr|H0YHG0|H0YHG0_HUMANUncharacterizedprotein(Fragment)OS=HomosapiensPE=1SV=1	0	0	0	638633	1915900	0	0	0	0	0	2;2;2	2;2;2	2;2;2	;;	3	2	2	2	1	0	0	0	1	0	1	0	0	0	1	0	1	0	0	0	1	0	9	9	9	23.671	210	210;213;523	0	11.503	4.3	0	0	0
sp|P60228|EIF3E_HUMANEukaryotictranslationinitiationfactor3subunitEOS=HomosapiensGN=EIF3EPE=1SV=1;tr|E5RIT4|E5RIT4_HUMANEukaryotictranslationinitiationfactor3subunitE(Fragment)OS=HomosapiensGN=EIF3EPE=1SV=1;tr|H0YBR5|H0YBR5_HUMANEukaryotictranslationinitiationfactor3subunitE(Fragment)OS=HomosapiensGN=EIF3EPE=1SV=1;tr|E5RHS5|E5RHS5_HUMANEukaryotictranslationinitiationfactor3subunitE(Fragment)OS=Ho…	sp|P60228|EIF3E_HUMANEukaryotictranslationinitiationfactor3subunitEOS=HomosapiensGN=EIF3EPE=1SV=1;tr|E5RIT4|E5RIT4_HUMANEukaryotictranslationinitiationfactor3subunitE(Fragment)OS=HomosapiensGN=EIF3EPE=1SV=1;tr|H0YBR5|H0YBR5_HUMANEukaryotictranslationinitiationfactor3subunitE(Fragment)OS=HomosapiensGN=EIF3EPE=1SV=1;tr|E5RHS5|E5RHS5_HUMANEukaryotictranslationinitiationfactor3subunitE(Fragment)OS=Ho…	0	0	0	624400	0	1873200	0	0	0	0	2;1;1;1;1	2;1;1;1;1	2;1;1;1;1	;;;;	5	2	2	2	0	2	1	0	0	0	0	2	1	0	0	0	0	2	1	0	0	0	4.7	4.7	4.7	52.22	445	445;75;171;226;352	0	12.112	0	4.7	2.2	0
tr|J3KT10|J3KT10_HUMANNuclearporecomplexproteinNup85OS=HomosapiensGN=NUP85PE=1SV=1;sp|Q9BW27|NUP85_HUMANNuclearporecomplexproteinNup85OS=HomosapiensGN=NUP85PE=1SV=1;tr|J3KSH3|J3KSH3_HUMANNuclearporecomplexproteinNup85(Fragment)OS=HomosapiensGN=NUP85PE=1SV=1;tr|J3KRC0|J3KRC0_HUMANNuclearporecomplexproteinNup85OS=HomosapiensGN=NUP85PE=1SV=1;tr|J3QLV0|J3QLV0_HUMANNuclearporecomplexproteinNup85(Fragm…	tr|J3KT10|J3KT10_HUMANNuclearporecomplexproteinNup85OS=HomosapiensGN=NUP85PE=1SV=1;sp|Q9BW27|NUP85_HUMANNuclearporecomplexproteinNup85OS=HomosapiensGN=NUP85PE=1SV=1;tr|J3KSH3|J3KSH3_HUMANNuclearporecomplexproteinNup85(Fragment)OS=HomosapiensGN=NUP85PE=1SV=1;tr|J3KRC0|J3KRC0_HUMANNuclearporecomplexproteinNup85OS=HomosapiensGN=NUP85PE=1SV=1;tr|J3QLV0|J3QLV0_HUMANNuclearporecomplexproteinNup85(Fragm…	0	0	0	624133	0	0	1872400	0	0	0	2;2;1;1;1;1;1;1	2;2;1;1;1;1;1;1	2;2;1;1;1;1;1;1	;;;;;;;	8	2	2	2	0	0	2	0	0	0	0	0	2	0	0	0	0	0	2	0	0	0	4.6	4.6	4.6	70.177	611	611;656;120;169;191;272;302;544	0	11.433	0	0	4.6	0
tr|B0QY90|B0QY90_HUMANEukaryotictranslationinitiationfactor3subunitLOS=HomosapiensGN=EIF3LPE=1SV=1;sp|Q9Y262|EIF3L_HUMANEukaryotictranslationinitiationfactor3subunitLOS=HomosapiensGN=EIF3LPE=1SV=1;tr|B0QY89|B0QY89_HUMANEukaryotictranslationinitiationfactor3subunitLOS=HomosapiensGN=EIF3LPE=1SV=1	tr|B0QY90|B0QY90_HUMANEukaryotictranslationinitiationfactor3subunitLOS=HomosapiensGN=EIF3LPE=1SV=1;sp|Q9Y262|EIF3L_HUMANEukaryotictranslationinitiationfactor3subunitLOS=HomosapiensGN=EIF3LPE=1SV=1;tr|B0QY89|B0QY89_HUMANEukaryotictranslationinitiationfactor3subunitLOS=HomosapiensGN=EIF3LPE=1SV=1	0	0	0	620367	0	1861100	0	0	0	0	2;2;2	2;2;2	2;2;2	;;	3	2	2	2	0	2	0	0	0	0	0	2	0	0	0	0	0	2	0	0	0	0	4.9	4.9	4.9	55.161	466	466;564;607	0	13.857	0	4.9	0	0
sp|Q13547|HDAC1_HUMANHistonedeacetylase1OS=HomosapiensGN=HDAC1PE=1SV=1;tr|Q5TEE2|Q5TEE2_HUMANHistonedeacetylase1(Fragment)OS=HomosapiensGN=HDAC1PE=1SV=1;tr|E5RK19|E5RK19_HUMANHistonedeacetylase2(Fragment)OS=HomosapiensGN=HDAC2PE=1SV=1;tr|E5RFI6|E5RFI6_HUMANHistonedeacetylase2(Fragment)OS=HomosapiensGN=HDAC2PE=1SV=1;tr|E5RJ04|E5RJ04_HUMANHistonedeacetylase2(Fragment)OS=HomosapiensGN=HDAC2PE=1SV=1;…	sp|Q13547|HDAC1_HUMANHistonedeacetylase1OS=HomosapiensGN=HDAC1PE=1SV=1;tr|Q5TEE2|Q5TEE2_HUMANHistonedeacetylase1(Fragment)OS=HomosapiensGN=HDAC1PE=1SV=1	0	0	0	615700	0	0	1847100	0	0	0	3;2;1;1;1;1;1;1;1;1;1	1;0;0;0;0;0;0;0;0;0;0	1;0;0;0;0;0;0;0;0;0;0	;	11	3	1	1	0	1	3	0	0	0	0	0	1	0	0	0	0	0	1	0	0	0	8.9	3.7	3.7	55.102	482	482;211;52;60;65;71;86;100;103;109;161	0.0093985	6.0341	0	2.5	8.9	0
tr|A0A0D9SF54|A0A0D9SF54_HUMANSpectrinalphachain,non-erythrocytic1OS=HomosapiensGN=SPTAN1PE=1SV=1	tr|A0A0D9SF54|A0A0D9SF54_HUMANSpectrinalphachain,non-erythrocytic1OS=HomosapiensGN=SPTAN1PE=1SV=1	0	0	0	615567	0	0	1846700	0	0	0	57	1	1		1	57	1	1	0	46	41	0	0	0	0	0	1	0	0	0	0	0	1	0	0	0	27.7	0.7	0.7	282.83	2457	2457	0	18.014	0	23.7	20.6	0
tr|M0QYL7|M0QYL7_HUMANHeterogeneousnuclearribonucleoproteinL(Fragment)OS=HomosapiensGN=HNRNPLPE=1SV=1;tr|M0R1W6|M0R1W6_HUMANHeterogeneousnuclearribonucleoproteinL(Fragment)OS=HomosapiensGN=HNRNPLPE=1SV=1;tr|M0QXS5|M0QXS5_HUMANHeterogeneousnuclearribonucleoproteinL(Fragment)OS=HomosapiensGN=HNRNPLPE=1SV=1;sp|P14866|HNRPL_HUMANHeterogeneousnuclearribonucleoproteinLOS=HomosapiensGN=HNRNPLPE=1SV=2	tr|M0QYL7|M0QYL7_HUMANHeterogeneousnuclearribonucleoproteinL(Fragment)OS=HomosapiensGN=HNRNPLPE=1SV=1;tr|M0R1W6|M0R1W6_HUMANHeterogeneousnuclearribonucleoproteinL(Fragment)OS=HomosapiensGN=HNRNPLPE=1SV=1;tr|M0QXS5|M0QXS5_HUMANHeterogeneousnuclearribonucleoproteinL(Fragment)OS=HomosapiensGN=HNRNPLPE=1SV=1;sp|P14866|HNRPL_HUMANHeterogeneousnuclearribonucleoproteinLOS=HomosapiensGN=HNRNPLPE=1SV=2	0	0	0	614633	0	1843900	0	0	0	0	1;1;1;1	1;1;1;1	1;1;1;1	;;;	4	1	1	1	0	1	0	0	0	0	0	1	0	0	0	0	0	1	0	0	0	0	5.1	5.1	5.1	21.892	198	198;220;530;589	0	7.1871	0	5.1	0	0
sp|P17302|CXA1_HUMANGapjunctionalpha-1proteinOS=HomosapiensGN=GJA1PE=1SV=2	sp|P17302|CXA1_HUMANGapjunctionalpha-1proteinOS=HomosapiensGN=GJA1PE=1SV=2	0	0	0	611467	0	0	1834400	0	0	0	1	1	1		1	1	1	1	0	0	1	0	0	0	0	0	1	0	0	0	0	0	1	0	0	0	3.9	3.9	3.9	43.008	382	382	0.0020661	6.409	0	0	3.9	0
sp|Q16352|AINX_HUMANAlpha-internexinOS=HomosapiensGN=INAPE=1SV=2;tr|A0A087WYG8|A0A087WYG8_HUMANAlpha-internexinOS=HomosapiensGN=INAPE=1SV=1;sp|P12036|NFH_HUMANNeurofilamentheavypolypeptideOS=HomosapiensGN=NEFHPE=1SV=4	sp|Q16352|AINX_HUMANAlpha-internexinOS=HomosapiensGN=INAPE=1SV=2;tr|A0A087WYG8|A0A087WYG8_HUMANAlpha-internexinOS=HomosapiensGN=INAPE=1SV=1;sp|P12036|NFH_HUMANNeurofilamentheavypolypeptideOS=HomosapiensGN=NEFHPE=1SV=4	0	0	0	593067	1779200	0	0	0	0	0	3;2;2	1;0;0	1;0;0	;;	3	3	1	1	2	1	2	0	1	1	1	0	0	0	0	0	1	0	0	0	0	0	6.2	2.2	2.2	55.39	499	499;496;1026	1	-2	4	1.8	4	0
sp|Q9P2R3|ANFY1_HUMANRabankyrin-5OS=HomosapiensGN=ANKFY1PE=1SV=2	sp|Q9P2R3|ANFY1_HUMANRabankyrin-5OS=HomosapiensGN=ANKFY1PE=1SV=2	0	0	0	585167	0	1755500	0	0	0	0	3	3	3		1	3	3	3	0	3	0	0	0	0	0	3	0	0	0	0	0	3	0	0	0	0	4.3	4.3	4.3	128.4	1169	1169	0	17.873	0	4.3	0	0
sp|Q9NU22|MDN1_HUMANMidasinOS=HomosapiensGN=MDN1PE=1SV=2;tr|Q5T795|Q5T795_HUMANMidasin(Fragment)OS=HomosapiensGN=MDN1PE=1SV=1	sp|Q9NU22|MDN1_HUMANMidasinOS=HomosapiensGN=MDN1PE=1SV=2;tr|Q5T795|Q5T795_HUMANMidasin(Fragment)OS=HomosapiensGN=MDN1PE=1SV=1	0	0	0	580233	0	0	1740700	0	0	0	4;2	4;2	4;2	;	2	4	4	4	0	1	3	0	0	0	0	1	3	0	0	0	0	1	3	0	0	0	0.8	0.8	0.8	632.81	5596	5596;1181	0	24.083	0	0.2	0.6	0
sp|P52292|IMA1_HUMANImportinsubunitalpha-1OS=HomosapiensGN=KPNA2PE=1SV=1	sp|P52292|IMA1_HUMANImportinsubunitalpha-1OS=HomosapiensGN=KPNA2PE=1SV=1	0	0	0	575667	0	1727000	0	0	0	0	2	2	2		1	2	2	2	0	2	0	0	0	1	0	2	0	0	0	1	0	2	0	0	0	1	6.6	6.6	6.6	57.861	529	529	0	15.289	0	6.6	0	0
sp|Q9UK61|F208A_HUMANProteinFAM208AOS=HomosapiensGN=FAM208APE=1SV=3;tr|A0A087X0F1|A0A087X0F1_HUMANProteinFAM208AOS=HomosapiensGN=FAM208APE=1SV=1	sp|Q9UK61|F208A_HUMANProteinFAM208AOS=HomosapiensGN=FAM208APE=1SV=3;tr|A0A087X0F1|A0A087X0F1_HUMANProteinFAM208AOS=HomosapiensGN=FAM208APE=1SV=1	0	0	0	575167	0	1725500	0	0	0	0	3;2	3;2	3;2	;	2	3	3	3	0	2	2	0	0	0	0	2	2	0	0	0	0	2	2	0	0	0	1.6	1.6	1.6	189.03	1670	1670;1035	0	17.56	0	1.1	0.9	0
sp|Q99832|TCPH_HUMANT-complexprotein1subunitetaOS=HomosapiensGN=CCT7PE=1SV=2	sp|Q99832|TCPH_HUMANT-complexprotein1subunitetaOS=HomosapiensGN=CCT7PE=1SV=2	0	0	0	564867	0	0	1694600	0	0	0	2	2	2		1	2	2	2	0	1	2	0	0	0	0	1	2	0	0	0	0	1	2	0	0	0	3.9	3.9	3.9	59.366	543	543	0	12.361	0	1.3	3.9	0
tr|F5GYM0|F5GYM0_HUMANN-acylneuraminatecytidylyltransferase(Fragment)OS=HomosapiensGN=CMASPE=1SV=1;sp|Q8NFW8|NEUA_HUMANN-acylneuraminatecytidylyltransferaseOS=HomosapiensGN=CMASPE=1SV=2	tr|F5GYM0|F5GYM0_HUMANN-acylneuraminatecytidylyltransferase(Fragment)OS=HomosapiensGN=CMASPE=1SV=1;sp|Q8NFW8|NEUA_HUMANN-acylneuraminatecytidylyltransferaseOS=HomosapiensGN=CMASPE=1SV=2	0	0	0	560367	0	0	1681100	0	0	0	1;1	1;1	1;1	;	2	1	1	1	0	0	1	0	0	0	0	0	1	0	0	0	0	0	1	0	0	0	12.4	12.4	12.4	11.654	97	97;434	0	7.3311	0	0	12.4	0
sp|Q53F19|CQ085_HUMANUncharacterizedproteinC17orf85OS=HomosapiensGN=C17orf85PE=1SV=2	sp|Q53F19|CQ085_HUMANUncharacterizedproteinC17orf85OS=HomosapiensGN=C17orf85PE=1SV=2	0	0	0	554733	0	0	1664200	0	0	0	2	2	2		1	2	2	2	0	0	2	0	0	0	0	0	2	0	0	0	0	0	2	0	0	0	4.2	4.2	4.2	70.592	620	620	0	11.659	0	0	4.2	0
tr|E7EN38|E7EN38_HUMANDNArepairproteinRAD50(Fragment)OS=HomosapiensGN=RAD50PE=1SV=1;sp|Q92878|RAD50_HUMANDNArepairproteinRAD50OS=HomosapiensGN=RAD50PE=1SV=1;tr|E7ESD9|E7ESD9_HUMANDNArepairproteinRAD50OS=HomosapiensGN=RAD50PE=1SV=1	tr|E7EN38|E7EN38_HUMANDNArepairproteinRAD50(Fragment)OS=HomosapiensGN=RAD50PE=1SV=1;sp|Q92878|RAD50_HUMANDNArepairproteinRAD50OS=HomosapiensGN=RAD50PE=1SV=1;tr|E7ESD9|E7ESD9_HUMANDNArepairproteinRAD50OS=HomosapiensGN=RAD50PE=1SV=1	0	0	0	552133	0	0	1656400	0	0	0	2;2;1	2;2;1	2;2;1	;;	3	2	2	2	0	0	2	0	0	0	0	0	2	0	0	0	0	0	2	0	0	0	4.5	4.5	4.5	76.557	660	660;1312;551	0	11.985	0	0	4.5	0
sp|P51532|SMCA4_HUMANTranscriptionactivatorBRG1OS=HomosapiensGN=SMARCA4PE=1SV=2;tr|Q9HBD4|Q9HBD4_HUMANSMARCA4isoform2OS=HomosapiensGN=SMARCA4PE=1SV=1;tr|A0A0A0MT49|A0A0A0MT49_HUMANTranscriptionactivatorBRG1OS=HomosapiensGN=SMARCA4PE=1SV=1	sp|P51532|SMCA4_HUMANTranscriptionactivatorBRG1OS=HomosapiensGN=SMARCA4PE=1SV=2;tr|Q9HBD4|Q9HBD4_HUMANSMARCA4isoform2OS=HomosapiensGN=SMARCA4PE=1SV=1;tr|A0A0A0MT49|A0A0A0MT49_HUMANTranscriptionactivatorBRG1OS=HomosapiensGN=SMARCA4PE=1SV=1	0	0	0	551500	0	0	1654500	0	0	0	2;2;2	2;2;2	2;2;2	;;	3	2	2	2	0	0	2	0	0	0	0	0	2	0	0	0	0	0	2	0	0	0	1.6	1.6	1.6	184.64	1647	1647;1679;1681	0	11.584	0	0	1.6	0
tr|A0A0C4DGB6|A0A0C4DGB6_HUMANSerumalbuminOS=HomosapiensGN=ALBPE=1SV=1;sp|P02768|ALBU_HUMANSerumalbuminOS=HomosapiensGN=ALBPE=1SV=2;CON__P02768-1;tr|A0A087WWT3|A0A087WWT3_HUMANSerumalbuminOS=HomosapiensGN=ALBPE=1SV=1;tr|C9JKR2|C9JKR2_HUMANAlbumin,isoformCRA_kOS=HomosapiensGN=ALBPE=1SV=1;tr|B7WNR0|B7WNR0_HUMANSerumalbuminOS=HomosapiensGN=ALBPE=1SV=1;tr|H7C013|H7C013_HUMANSerumalbumin(Fragment)OS=H…	tr|A0A0C4DGB6|A0A0C4DGB6_HUMANSerumalbuminOS=HomosapiensGN=ALBPE=1SV=1;sp|P02768|ALBU_HUMANSerumalbuminOS=HomosapiensGN=ALBPE=1SV=2;CON__P02768-1;tr|A0A087WWT3|A0A087WWT3_HUMANSerumalbuminOS=HomosapiensGN=ALBPE=1SV=1;tr|C9JKR2|C9JKR2_HUMANAlbumin,isoformCRA_kOS=HomosapiensGN=ALBPE=1SV=1;tr|B7WNR0|B7WNR0_HUMANSerumalbuminOS=HomosapiensGN=ALBPE=1SV=1;tr|H7C013|H7C013_HUMANSerumalbumin(Fragment)OS=H…	0	0	0	539067	0	0	1617200	0	0	0	6;6;6;4;4;4;3	2;2;2;2;1;1;2	2;2;2;2;1;1;2	;;;;;;	7	6	2	2	2	3	5	2	2	1	1	0	1	0	0	0	1	0	1	0	0	0	7.9	3.1	3.1	69.226	604	604;609;609;396;417;494;197	0	13.399	4	3.6	6.5	3.6
sp|Q00610|CLH1_HUMANClathrinheavychain1OS=HomosapiensGN=CLTCPE=1SV=5;tr|A0A087WVQ6|A0A087WVQ6_HUMANClathrinheavychainOS=HomosapiensGN=CLTCPE=1SV=1;tr|A0A087WX41|A0A087WX41_HUMANClathrinheavychain2OS=HomosapiensGN=CLTCL1PE=1SV=1;sp|P53675|CLH2_HUMANClathrinheavychain2OS=HomosapiensGN=CLTCL1PE=1SV=2;tr|J3KS13|J3KS13_HUMANClathrinheavychain1OS=HomosapiensGN=CLTCPE=1SV=1	sp|Q00610|CLH1_HUMANClathrinheavychain1OS=HomosapiensGN=CLTCPE=1SV=5;tr|A0A087WVQ6|A0A087WVQ6_HUMANClathrinheavychainOS=HomosapiensGN=CLTCPE=1SV=1;tr|A0A087WX41|A0A087WX41_HUMANClathrinheavychain2OS=HomosapiensGN=CLTCL1PE=1SV=1;sp|P53675|CLH2_HUMANClathrinheavychain2OS=HomosapiensGN=CLTCL1PE=1SV=2	0	0	0	503033	0	0	1509100	0	0	0	3;3;2;2;1	3;3;2;2;1	3;3;2;2;1	;;;	5	3	3	3	0	1	3	0	0	0	0	1	3	0	0	0	0	1	3	0	0	0	2.1	2.1	2.1	191.61	1675	1675;1679;1260;1640;612	0	19.005	0	0.7	2.1	0
sp|Q99613|EIF3C_HUMANEukaryotictranslationinitiationfactor3subunitCOS=HomosapiensGN=EIF3CPE=1SV=1;sp|B5ME19|EIFCL_HUMANEukaryotictranslationinitiationfactor3subunitC-likeproteinOS=HomosapiensGN=EIF3CLPE=3SV=1;tr|H3BTY8|H3BTY8_HUMANEukaryotictranslationinitiationfactor3subunitC(Fragment)OS=HomosapiensGN=EIF3CPE=1SV=5;tr|H3BPE3|H3BPE3_HUMANEukaryotictranslationinitiationfactor3subunitC(Fragment)OS=…	sp|Q99613|EIF3C_HUMANEukaryotictranslationinitiationfactor3subunitCOS=HomosapiensGN=EIF3CPE=1SV=1;sp|B5ME19|EIFCL_HUMANEukaryotictranslationinitiationfactor3subunitC-likeproteinOS=HomosapiensGN=EIF3CLPE=3SV=1	0	0	0	496667	0	1490000	0	0	0	0	5;5;1;1;1	5;5;1;1;1	5;5;1;1;1	;	5	5	5	5	0	3	2	1	0	0	0	3	2	1	0	0	0	3	2	1	0	0	5.6	5.6	5.6	105.34	913	913;914;80;133;148	0	30.968	0	3.4	2.6	1.1
sp|P08727|K1C19_HUMANKeratin,typeIcytoskeletal19OS=HomosapiensGN=KRT19PE=1SV=4;CON__P08727;CON__P19001;tr|C9JM50|C9JM50_HUMANKeratin,typeIcytoskeletal19(Fragment)OS=HomosapiensGN=KRT19PE=1SV=1	sp|P08727|K1C19_HUMANKeratin,typeIcytoskeletal19OS=HomosapiensGN=KRT19PE=1SV=4;CON__P08727;CON__P19001;tr|C9JM50|C9JM50_HUMANKeratin,typeIcytoskeletal19(Fragment)OS=HomosapiensGN=KRT19PE=1SV=1	0	0	0	487500	0	0	1462500	0	0	0	5;5;5;4	1;1;1;1	0;0;0;0	;;;	4	5	1	0	1	3	4	3	0	0	0	1	1	0	0	0	0	0	0	0	0	0	9	2.2	0	44.105	400	400;400;403;196	0.0058366	6.1575	2.2	6.8	9	6.2
sp|O95425|SVIL_HUMANSupervillinOS=HomosapiensGN=SVILPE=1SV=2	sp|O95425|SVIL_HUMANSupervillinOS=HomosapiensGN=SVILPE=1SV=2	0	0	0	485667	0	0	1457000	0	0	0	3	3	3		1	3	3	3	0	1	3	0	0	0	0	1	3	0	0	0	0	1	3	0	0	0	2.1	2.1	2.1	247.74	2214	2214	0	18.504	0	0.5	2.1	0
sp|P17987|TCPA_HUMANT-complexprotein1subunitalphaOS=HomosapiensGN=TCP1PE=1SV=1;tr|F5H726|F5H726_HUMANT-complexprotein1subunitalpha(Fragment)OS=HomosapiensGN=TCP1PE=1SV=1;tr|F5GZI8|F5GZI8_HUMANT-complexprotein1subunitalphaOS=HomosapiensGN=TCP1PE=1SV=1;tr|F5H676|F5H676_HUMANT-complexprotein1subunitalpha(Fragment)OS=HomosapiensGN=TCP1PE=1SV=1;tr|F5H136|F5H136_HUMANT-complexprotein1subunitalpha(Fragm…	sp|P17987|TCPA_HUMANT-complexprotein1subunitalphaOS=HomosapiensGN=TCP1PE=1SV=1;tr|F5H726|F5H726_HUMANT-complexprotein1subunitalpha(Fragment)OS=HomosapiensGN=TCP1PE=1SV=1;tr|F5GZI8|F5GZI8_HUMANT-complexprotein1subunitalphaOS=HomosapiensGN=TCP1PE=1SV=1;tr|F5H676|F5H676_HUMANT-complexprotein1subunitalpha(Fragment)OS=HomosapiensGN=TCP1PE=1SV=1;tr|F5H136|F5H136_HUMANT-complexprotein1subunitalpha(Fragm…	0	0	0	475067	0	0	1425200	0	0	0	2;1;1;1;1;1;1;1	2;1;1;1;1;1;1;1	2;1;1;1;1;1;1;1	;;;;;;;	8	2	2	2	0	1	1	0	0	0	0	1	1	0	0	0	0	1	1	0	0	0	5.9	5.9	5.9	60.343	556	556;91;100;111;136;332;401;433	0	17.091	0	1.8	4.1	0
tr|G5E9S7|G5E9S7_HUMANActinrelatedprotein2/3complex,subunit2,34kDa,isoformCRA_eOS=HomosapiensGN=ARPC2PE=1SV=1;tr|C9JTV5|C9JTV5_HUMANActin-relatedprotein2/3complexsubunit2(Fragment)OS=HomosapiensGN=ARPC2PE=1SV=5;tr|G5E9J0|G5E9J0_HUMANActinrelatedprotein2/3complex,subunit2,34kDa,isoformCRA_dOS=HomosapiensGN=ARPC2PE=1SV=1;sp|O15144|ARPC2_HUMANActin-relatedprotein2/3complexsubunit2OS=HomosapiensGN=AR…	tr|G5E9S7|G5E9S7_HUMANActinrelatedprotein2/3complex,subunit2,34kDa,isoformCRA_eOS=HomosapiensGN=ARPC2PE=1SV=1;tr|C9JTV5|C9JTV5_HUMANActin-relatedprotein2/3complexsubunit2(Fragment)OS=HomosapiensGN=ARPC2PE=1SV=5;tr|G5E9J0|G5E9J0_HUMANActinrelatedprotein2/3complex,subunit2,34kDa,isoformCRA_dOS=HomosapiensGN=ARPC2PE=1SV=1;sp|O15144|ARPC2_HUMANActin-relatedprotein2/3complexsubunit2OS=HomosapiensGN=AR…	0	0	0	472967	1418900	0	0	0	0	0	1;1;1;1	1;1;1;1	1;1;1;1	;;;	4	1	1	1	1	0	0	0	0	0	1	0	0	0	0	0	1	0	0	0	0	0	23.7	23.7	23.7	4.1457	38	38;90;91;300	1	-2	23.7	0	0	0
sp|Q08211|DHX9_HUMANATP-dependentRNAhelicaseAOS=HomosapiensGN=DHX9PE=1SV=4	sp|Q08211|DHX9_HUMANATP-dependentRNAhelicaseAOS=HomosapiensGN=DHX9PE=1SV=4	0	0	0	460733	0	0	1382200	0	0	0	5	5	5		1	5	5	5	0	1	2	1	2	1	0	1	2	1	2	1	0	1	2	1	2	1	5.1	5.1	5.1	140.96	1270	1270	0	34.395	0	0.9	2.6	0.6
sp|Q86YM7|HOME1_HUMANHomerproteinhomolog1OS=HomosapiensGN=HOMER1PE=1SV=2;tr|Q86YM6|Q86YM6_HUMANHOMER1FOS=HomosapiensGN=HOMER1PE=1SV=1	sp|Q86YM7|HOME1_HUMANHomerproteinhomolog1OS=HomosapiensGN=HOMER1PE=1SV=2;tr|Q86YM6|Q86YM6_HUMANHOMER1FOS=HomosapiensGN=HOMER1PE=1SV=1	0	0	0	459833	0	1379500	0	0	0	0	2;1	2;1	2;1	;	2	2	2	2	0	2	0	0	0	0	0	2	0	0	0	0	0	2	0	0	0	0	8.8	8.8	8.8	40.276	354	354;180	0	11.76	0	8.8	0	0
sp|O15042|SR140_HUMANU2snRNP-associatedSURPmotif-containingproteinOS=HomosapiensGN=U2SURPPE=1SV=2;tr|E7ET15|E7ET15_HUMANU2snRNP-associatedSURPmotif-containingproteinOS=HomosapiensGN=U2SURPPE=1SV=1;tr|H7C4V2|H7C4V2_HUMANU2snRNP-associatedSURPmotif-containingprotein(Fragment)OS=HomosapiensGN=U2SURPPE=1SV=1;tr|E7EW00|E7EW00_HUMANU2snRNP-associatedSURPmotif-containingproteinOS=HomosapiensGN=U2SURPPE=…	sp|O15042|SR140_HUMANU2snRNP-associatedSURPmotif-containingproteinOS=HomosapiensGN=U2SURPPE=1SV=2;tr|E7ET15|E7ET15_HUMANU2snRNP-associatedSURPmotif-containingproteinOS=HomosapiensGN=U2SURPPE=1SV=1	0	0	0	458333	0	1375000	0	0	0	0	4;3;1;1;1	4;3;1;1;1	4;3;1;1;1	;	5	4	4	4	0	2	1	2	0	0	0	2	1	2	0	0	0	2	1	2	0	0	5.6	5.6	5.6	118.29	1029	1029;1028;290;425;439	0	27.271	0	2.3	1.2	3.3
sp|P61353|RL27_HUMAN60SribosomalproteinL27OS=HomosapiensGN=RPL27PE=1SV=2;tr|K7ERY7|K7ERY7_HUMAN60SribosomalproteinL27OS=HomosapiensGN=RPL27PE=1SV=1;tr|K7EQQ9|K7EQQ9_HUMAN60SribosomalproteinL27OS=HomosapiensGN=RPL27PE=1SV=1;tr|K7ELC7|K7ELC7_HUMAN60SribosomalproteinL27(Fragment)OS=HomosapiensGN=RPL27PE=1SV=1	sp|P61353|RL27_HUMAN60SribosomalproteinL27OS=HomosapiensGN=RPL27PE=1SV=2;tr|K7ERY7|K7ERY7_HUMAN60SribosomalproteinL27OS=HomosapiensGN=RPL27PE=1SV=1;tr|K7EQQ9|K7EQQ9_HUMAN60SribosomalproteinL27OS=HomosapiensGN=RPL27PE=1SV=1;tr|K7ELC7|K7ELC7_HUMAN60SribosomalproteinL27(Fragment)OS=HomosapiensGN=RPL27PE=1SV=1	0	0	0	453033	0	0	1359100	0	0	0	2;1;1;1	2;1;1;1	2;1;1;1	;;;	4	2	2	2	0	0	2	0	0	1	0	0	2	0	0	1	0	0	2	0	0	1	12.5	12.5	12.5	15.798	136	136;40;80;144	0	11.284	0	0	12.5	0
sp|P55081|MFAP1_HUMANMicrofibrillar-associatedprotein1OS=HomosapiensGN=MFAP1PE=1SV=2	sp|P55081|MFAP1_HUMANMicrofibrillar-associatedprotein1OS=HomosapiensGN=MFAP1PE=1SV=2	0	0	0	440533	0	0	1321600	0	0	0	2	2	2		1	2	2	2	0	1	1	0	0	0	0	1	1	0	0	0	0	1	1	0	0	0	6.2	6.2	6.2	51.958	439	439	0	11.596	0	3	3.2	0
sp|Q8N1N4|K2C78_HUMANKeratin,typeIIcytoskeletal78OS=HomosapiensGN=KRT78PE=2SV=2;CON__Q8N1N4-2;CON__Q7RTT2	sp|Q8N1N4|K2C78_HUMANKeratin,typeIIcytoskeletal78OS=HomosapiensGN=KRT78PE=2SV=2;CON__Q8N1N4-2;CON__Q7RTT2	0	0	0	416450	0	746390	502960	0	0	0	3;3;3	2;2;2	2;2;2	;;	3	3	2	2	0	3	2	0	0	0	0	2	2	0	0	0	0	2	2	0	0	0	5.4	4	4	56.865	520	520;521;521	0	11.599	0	5.4	4	0
sp|P31151|S10A7_HUMANProteinS100-A7OS=HomosapiensGN=S100A7PE=1SV=4;sp|Q86SG5|S1A7A_HUMANProteinS100-A7AOS=HomosapiensGN=S100A7APE=1SV=3	sp|P31151|S10A7_HUMANProteinS100-A7OS=HomosapiensGN=S100A7PE=1SV=4;sp|Q86SG5|S1A7A_HUMANProteinS100-A7AOS=HomosapiensGN=S100A7APE=1SV=3	0	0	0	414500	0	1243500	0	0	0	0	2;1	2;1	2;1	;	2	2	2	2	0	2	0	0	0	0	0	2	0	0	0	0	0	2	0	0	0	0	21.8	21.8	21.8	11.471	101	101;101	0	11.772	0	21.8	0	0
REV__tr|H0YDM4|H0YDM4_HUMANProteinHookhomolog3(Fragment)OS=HomosapiensGN=HOOK3PE=1SV=1;REV__sp|Q86VS8|HOOK3_HUMANProteinHookhomolog3OS=HomosapiensGN=HOOK3PE=1SV=2	REV__tr|H0YDM4|H0YDM4_HUMANProteinHookhomolog3(Fragment)OS=HomosapiensGN=HOOK3PE=1SV=1;REV__sp|Q86VS8|HOOK3_HUMANProteinHookhomolog3OS=HomosapiensGN=HOOK3PE=1SV=2	0	0	0	409567	0	1228700	0	0	0	0	1;1	1;1	1;1	;	2	1	1	1	0	1	0	0	0	0	0	1	0	0	0	0	0	1	0	0	0	0	0	0	0	19.129	161	161;718	0.0075614	6.0455	0	0	0	0
tr|E9PMV1|E9PMV1_HUMANPlectin(Fragment)OS=HomosapiensGN=PLECPE=1SV=1	tr|E9PMV1|E9PMV1_HUMANPlectin(Fragment)OS=HomosapiensGN=PLECPE=1SV=1	0	0	0	397400	0	1192200	0	0	0	0	18	1	1		1	18	1	1	0	15	12	0	0	0	0	1	0	0	0	0	0	1	0	0	0	0	32	2.4	2.4	80.779	703	703	0.0021552	6.6662	0	26.5	21.3	0
tr|F2Z2V2|F2Z2V2_HUMANTHOcomplexsubunit2OS=HomosapiensGN=THOC2PE=1SV=1;sp|Q8NI27|THOC2_HUMANTHOcomplexsubunit2OS=HomosapiensGN=THOC2PE=1SV=2	tr|F2Z2V2|F2Z2V2_HUMANTHOcomplexsubunit2OS=HomosapiensGN=THOC2PE=1SV=1;sp|Q8NI27|THOC2_HUMANTHOcomplexsubunit2OS=HomosapiensGN=THOC2PE=1SV=2	0	0	0	392600	0	0	1177800	0	0	0	1;1	1;1	1;1	;	2	1	1	1	0	1	1	0	0	0	0	1	1	0	0	0	0	1	1	0	0	0	10.8	10.8	10.8	13.865	120	120;1593	0	7.2583	0	10.8	10.8	0
tr|F8WBR5|F8WBR5_HUMANCalmodulinOS=HomosapiensGN=CALM2PE=1SV=1;tr|M0QZ52|M0QZ52_HUMANCalmodulinOS=HomosapiensGN=CALM3PE=1SV=1;tr|G3V479|G3V479_HUMANCalmodulinOS=HomosapiensGN=CALM1PE=1SV=1;sp|P62158|CALM_HUMANCalmodulinOS=HomosapiensGN=CALM1PE=1SV=2;tr|H0Y7A7|H0Y7A7_HUMANCalmodulin(Fragment)OS=HomosapiensGN=CALM2PE=1SV=1	tr|F8WBR5|F8WBR5_HUMANCalmodulinOS=HomosapiensGN=CALM2PE=1SV=1;tr|M0QZ52|M0QZ52_HUMANCalmodulinOS=HomosapiensGN=CALM3PE=1SV=1;tr|G3V479|G3V479_HUMANCalmodulinOS=HomosapiensGN=CALM1PE=1SV=1;sp|P62158|CALM_HUMANCalmodulinOS=HomosapiensGN=CALM1PE=1SV=2;tr|H0Y7A7|H0Y7A7_HUMANCalmodulin(Fragment)OS=HomosapiensGN=CALM2PE=1SV=1	0	0	0	392200	0	0	1176600	0	0	0	1;1;1;1;1	1;1;1;1;1	1;1;1;1;1	;;;;	5	1	1	1	0	1	1	0	0	0	0	1	1	0	0	0	0	1	1	0	0	0	20	20	20	7.372	65	65;83;83;149;187	0	13.805	0	20	20	0
sp|P55884|EIF3B_HUMANEukaryotictranslationinitiationfactor3subunitBOS=HomosapiensGN=EIF3BPE=1SV=3;tr|C9JQN7|C9JQN7_HUMANEukaryotictranslationinitiationfactor3subunitB(Fragment)OS=HomosapiensGN=EIF3BPE=1SV=1	sp|P55884|EIF3B_HUMANEukaryotictranslationinitiationfactor3subunitBOS=HomosapiensGN=EIF3BPE=1SV=3	0	0	0	381533	0	0	1144600	0	0	0	3;1	3;1	3;1		2	3	3	3	0	1	2	0	0	0	0	1	2	0	0	0	0	1	2	0	0	0	3.6	3.6	3.6	92.48	814	814;153	0	17.931	0	1.2	2.3	0
tr|F8VRN8|F8VRN8_HUMANLIMdomainandactin-bindingprotein1OS=HomosapiensGN=LIMA1PE=1SV=1;sp|Q9UHB6|LIMA1_HUMANLIMdomainandactin-bindingprotein1OS=HomosapiensGN=LIMA1PE=1SV=1;tr|F8VTU2|F8VTU2_HUMANLIMdomainandactin-bindingprotein1(Fragment)OS=HomosapiensGN=LIMA1PE=1SV=1;tr|F8VQE1|F8VQE1_HUMANLIMdomainandactin-bindingprotein1OS=HomosapiensGN=LIMA1PE=1SV=1	tr|F8VRN8|F8VRN8_HUMANLIMdomainandactin-bindingprotein1OS=HomosapiensGN=LIMA1PE=1SV=1;sp|Q9UHB6|LIMA1_HUMANLIMdomainandactin-bindingprotein1OS=HomosapiensGN=LIMA1PE=1SV=1;tr|F8VTU2|F8VTU2_HUMANLIMdomainandactin-bindingprotein1(Fragment)OS=HomosapiensGN=LIMA1PE=1SV=1;tr|F8VQE1|F8VQE1_HUMANLIMdomainandactin-bindingprotein1OS=HomosapiensGN=LIMA1PE=1SV=1	0	0	0	374967	0	1124900	0	0	0	0	2;2;1;1	2;2;1;1	2;2;1;1	;;;	4	2	2	2	0	2	0	0	0	0	0	2	0	0	0	0	0	2	0	0	0	0	6.2	6.2	6.2	43.19	388	388;759;130;598	0	11.133	0	6.2	0	0
sp|Q5VWN6|F208B_HUMANProteinFAM208BOS=HomosapiensGN=FAM208BPE=1SV=1	sp|Q5VWN6|F208B_HUMANProteinFAM208BOS=HomosapiensGN=FAM208BPE=1SV=1	0	0	0	366533	0	1099600	0	0	0	0	2	2	2		1	2	2	2	0	2	0	0	0	0	0	2	0	0	0	0	0	2	0	0	0	0	1.1	1.1	1.1	268.84	2430	2430	0	14.018	0	1.1	0	0
sp|Q9BRS2|RIOK1_HUMANSerine/threonine-proteinkinaseRIO1OS=HomosapiensGN=RIOK1PE=1SV=2	sp|Q9BRS2|RIOK1_HUMANSerine/threonine-proteinkinaseRIO1OS=HomosapiensGN=RIOK1PE=1SV=2	0	0	0	341300	0	1023900	0	0	0	0	2	2	2		1	2	2	2	0	1	1	0	0	0	0	1	1	0	0	0	0	1	1	0	0	0	4.4	4.4	4.4	65.582	568	568	0	11.569	0	2.3	2.1	0
tr|C9J144|C9J144_HUMANCateninalpha-2(Fragment)OS=HomosapiensGN=CTNNA2PE=1SV=1;tr|C9IZ88|C9IZ88_HUMANCateninalpha-2(Fragment)OS=HomosapiensGN=CTNNA2PE=1SV=1;sp|P26232|CTNA2_HUMANCateninalpha-2OS=HomosapiensGN=CTNNA2PE=1SV=5	tr|C9J144|C9J144_HUMANCateninalpha-2(Fragment)OS=HomosapiensGN=CTNNA2PE=1SV=1;tr|C9IZ88|C9IZ88_HUMANCateninalpha-2(Fragment)OS=HomosapiensGN=CTNNA2PE=1SV=1;sp|P26232|CTNA2_HUMANCateninalpha-2OS=HomosapiensGN=CTNNA2PE=1SV=5	0	0	0	340033	0	0	1020100	0	0	0	1;1;1	1;1;1	1;1;1	;;	3	1	1	1	0	1	1	0	0	0	0	1	1	0	0	0	0	1	1	0	0	0	27.3	27.3	27.3	7.1843	66	66;117;953	0.0021277	6.5265	0	27.3	27.3	0
tr|F8WF65|F8WF65_HUMANElongationfactor1-betaOS=HomosapiensGN=EEF1B2PE=1SV=1;tr|F2Z2G2|F2Z2G2_HUMANElongationfactor1-betaOS=HomosapiensGN=EEF1B2PE=1SV=1;tr|C9JZW3|C9JZW3_HUMANElongationfactor1-beta(Fragment)OS=HomosapiensGN=EEF1B2PE=1SV=1;sp|P24534|EF1B_HUMANElongationfactor1-betaOS=HomosapiensGN=EEF1B2PE=1SV=3	tr|F8WF65|F8WF65_HUMANElongationfactor1-betaOS=HomosapiensGN=EEF1B2PE=1SV=1;tr|F2Z2G2|F2Z2G2_HUMANElongationfactor1-betaOS=HomosapiensGN=EEF1B2PE=1SV=1;tr|C9JZW3|C9JZW3_HUMANElongationfactor1-beta(Fragment)OS=HomosapiensGN=EEF1B2PE=1SV=1;sp|P24534|EF1B_HUMANElongationfactor1-betaOS=HomosapiensGN=EEF1B2PE=1SV=3	0	0	0	329547	0	988640	0	0	0	0	1;1;1;1	1;1;1;1	1;1;1;1	;;;	4	1	1	1	1	1	0	0	0	0	1	1	0	0	0	0	1	1	0	0	0	0	51.7	51.7	51.7	3.1045	29	29;68;123;225	0	86.599	51.7	51.7	0	0
sp|O94991|SLIK5_HUMANSLITandNTRK-likeprotein5OS=HomosapiensGN=SLITRK5PE=2SV=2	sp|O94991|SLIK5_HUMANSLITandNTRK-likeprotein5OS=HomosapiensGN=SLITRK5PE=2SV=2	0	0	0	328007	984020	0	0	0	0	0	1	1	1		1	1	1	1	1	0	0	0	0	0	1	0	0	0	0	0	1	0	0	0	0	0	1.3	1.3	1.3	107.48	958	958	0.002079	6.4624	1.3	0	0	0
tr|D6RF44|D6RF44_HUMANHeterogeneousnuclearribonucleoproteinD0(Fragment)OS=HomosapiensGN=HNRNPDPE=1SV=5;tr|H0YA96|H0YA96_HUMANHeterogeneousnuclearribonucleoproteinD0(Fragment)OS=HomosapiensGN=HNRNPDPE=1SV=1;tr|D6RAF8|D6RAF8_HUMANHeterogeneousnuclearribonucleoproteinD0(Fragment)OS=HomosapiensGN=HNRNPDPE=1SV=1;tr|H0Y8G5|H0Y8G5_HUMANHeterogeneousnuclearribonucleoproteinD0(Fragment)OS=HomosapiensGN=HN…	tr|D6RF44|D6RF44_HUMANHeterogeneousnuclearribonucleoproteinD0(Fragment)OS=HomosapiensGN=HNRNPDPE=1SV=5;tr|H0YA96|H0YA96_HUMANHeterogeneousnuclearribonucleoproteinD0(Fragment)OS=HomosapiensGN=HNRNPDPE=1SV=1;tr|D6RAF8|D6RAF8_HUMANHeterogeneousnuclearribonucleoproteinD0(Fragment)OS=HomosapiensGN=HNRNPDPE=1SV=1;tr|H0Y8G5|H0Y8G5_HUMANHeterogeneousnuclearribonucleoproteinD0(Fragment)OS=HomosapiensGN=HN…	0	0	0	302127	0	0	906380	0	0	0	1;1;1;1;1	1;1;1;1;1	1;1;1;1;1	;;;;	5	1	1	1	0	1	1	0	0	0	0	1	1	0	0	0	0	1	1	0	0	0	12.5	12.5	12.5	12.64	112	112;210;221;261;355	0.0021505	6.6542	0	12.5	12.5	0
sp|O75607|NPM3_HUMANNucleoplasmin-3OS=HomosapiensGN=NPM3PE=1SV=3	sp|O75607|NPM3_HUMANNucleoplasmin-3OS=HomosapiensGN=NPM3PE=1SV=3	0	0	0	301497	0	0	904490	0	0	0	1	1	1		1	1	1	1	0	0	1	0	0	0	0	0	1	0	0	0	0	0	1	0	0	0	9	9	9	19.343	178	178	0	37.936	0	0	9	0
sp|Q8NHQ1|CEP70_HUMANCentrosomalproteinof70kDaOS=HomosapiensGN=CEP70PE=1SV=2;tr|C9J710|C9J710_HUMANCentrosomalproteinof70kDa(Fragment)OS=HomosapiensGN=CEP70PE=1SV=1;tr|C9J966|C9J966_HUMANCentrosomalproteinof70kDa(Fragment)OS=HomosapiensGN=CEP70PE=1SV=2;tr|B7Z2D2|B7Z2D2_HUMANCentrosomalproteinof70kDaOS=HomosapiensGN=CEP70PE=1SV=1	sp|Q8NHQ1|CEP70_HUMANCentrosomalproteinof70kDaOS=HomosapiensGN=CEP70PE=1SV=2;tr|C9J710|C9J710_HUMANCentrosomalproteinof70kDa(Fragment)OS=HomosapiensGN=CEP70PE=1SV=1;tr|C9J966|C9J966_HUMANCentrosomalproteinof70kDa(Fragment)OS=HomosapiensGN=CEP70PE=1SV=2;tr|B7Z2D2|B7Z2D2_HUMANCentrosomalproteinof70kDaOS=HomosapiensGN=CEP70PE=1SV=1	0	0	0	301180	0	903540	0	0	0	0	2;1;1;1	2;1;1;1	2;1;1;1	;;;	4	2	2	2	0	2	0	0	0	0	0	2	0	0	0	0	0	2	0	0	0	0	3.9	3.9	3.9	69.751	597	597;259;293;445	0	11.395	0	3.9	0	0
tr|A0A0D9SEZ9|A0A0D9SEZ9_HUMANEukaryotictranslationinitiationfactor3subunitFOS=HomosapiensGN=EIF3FPE=1SV=1;sp|O00303|EIF3F_HUMANEukaryotictranslationinitiationfactor3subunitFOS=HomosapiensGN=EIF3FPE=1SV=1	tr|A0A0D9SEZ9|A0A0D9SEZ9_HUMANEukaryotictranslationinitiationfactor3subunitFOS=HomosapiensGN=EIF3FPE=1SV=1;sp|O00303|EIF3F_HUMANEukaryotictranslationinitiationfactor3subunitFOS=HomosapiensGN=EIF3FPE=1SV=1	0	0	0	295670	0	887010	0	0	0	0	1;1	1;1	1;1	;	2	1	1	1	0	1	0	0	0	0	0	1	0	0	0	0	0	1	0	0	0	0	4	4	4	32.713	299	299;357	0.0058824	6.2199	0	4	0	0
sp|P05109|S10A8_HUMANProteinS100-A8OS=HomosapiensGN=S100A8PE=1SV=1	sp|P05109|S10A8_HUMANProteinS100-A8OS=HomosapiensGN=S100A8PE=1SV=1	0	0	0	268653	0	0	805960	0	0	0	2	2	2		1	2	2	2	0	2	1	0	0	0	0	2	1	0	0	0	0	2	1	0	0	0	20.4	20.4	20.4	10.834	93	93	0	12.631	0	20.4	11.8	0
sp|O00148|DX39A_HUMANATP-dependentRNAhelicaseDDX39AOS=HomosapiensGN=DDX39APE=1SV=2;tr|K7EQN7|K7EQN7_HUMANATP-dependentRNAhelicaseDDX39A(Fragment)OS=HomosapiensGN=DDX39APE=1SV=1;tr|K7EPJ3|K7EPJ3_HUMANATP-dependentRNAhelicaseDDX39A(Fragment)OS=HomosapiensGN=DDX39APE=1SV=1;tr|K7ENP6|K7ENP6_HUMANATP-dependentRNAhelicaseDDX39A(Fragment)OS=HomosapiensGN=DDX39APE=1SV=1;tr|A0A0G2JHN7|A0A0G2JHN7_HUMANSpli…	sp|O00148|DX39A_HUMANATP-dependentRNAhelicaseDDX39AOS=HomosapiensGN=DDX39APE=1SV=2;tr|K7EQN7|K7EQN7_HUMANATP-dependentRNAhelicaseDDX39A(Fragment)OS=HomosapiensGN=DDX39APE=1SV=1	0	0	0	264647	0	0	793940	0	0	0	8;5;3;2;2;2;2;2;2;2;2;1	1;1;0;0;0;0;0;0;0;0;0;1	1;1;0;0;0;0;0;0;0;0;0;1	;	12	8	1	1	0	3	6	0	0	1	0	0	1	0	0	0	0	0	1	0	0	0	15.7	2.6	2.6	49.129	427	427;255;189;92;96;108;125;125;130;132;136;96	1	-2	0	5.4	11.9	0
tr|F8WE13|F8WE13_HUMANSWI/SNFcomplexsubunitSMARCC1OS=HomosapiensGN=SMARCC1PE=1SV=1;sp|Q92922|SMRC1_HUMANSWI/SNFcomplexsubunitSMARCC1OS=HomosapiensGN=SMARCC1PE=1SV=3	tr|F8WE13|F8WE13_HUMANSWI/SNFcomplexsubunitSMARCC1OS=HomosapiensGN=SMARCC1PE=1SV=1;sp|Q92922|SMRC1_HUMANSWI/SNFcomplexsubunitSMARCC1OS=HomosapiensGN=SMARCC1PE=1SV=3	0	0	0	261530	784590	0	0	0	0	0	1;1	1;1	1;1	;	2	1	1	1	1	0	0	0	0	0	1	0	0	0	0	0	1	0	0	0	0	0	6.8	6.8	6.8	13.84	133	133;1105	0.007533	6.0425	6.8	0	0	0
sp|Q8TAQ2|SMRC2_HUMANSWI/SNFcomplexsubunitSMARCC2OS=HomosapiensGN=SMARCC2PE=1SV=1;tr|F8VXC8|F8VXC8_HUMANSWI/SNFcomplexsubunitSMARCC2OS=HomosapiensGN=SMARCC2PE=1SV=1	sp|Q8TAQ2|SMRC2_HUMANSWI/SNFcomplexsubunitSMARCC2OS=HomosapiensGN=SMARCC2PE=1SV=1;tr|F8VXC8|F8VXC8_HUMANSWI/SNFcomplexsubunitSMARCC2OS=HomosapiensGN=SMARCC2PE=1SV=1	0	0	0	259020	0	0	777060	0	0	0	1;1	1;1	1;1	;	2	1	1	1	0	0	1	0	0	0	0	0	1	0	0	0	0	0	1	0	0	0	1.7	1.7	1.7	132.88	1214	1214;1245	0.0021368	6.5622	0	0	1.7	0
tr|H0YIQ2|H0YIQ2_HUMANYLPmotif-containingprotein1(Fragment)OS=HomosapiensGN=YLPM1PE=1SV=1;sp|P49750|YLPM1_HUMANYLPmotif-containingprotein1OS=HomosapiensGN=YLPM1PE=1SV=3	tr|H0YIQ2|H0YIQ2_HUMANYLPmotif-containingprotein1(Fragment)OS=HomosapiensGN=YLPM1PE=1SV=1;sp|P49750|YLPM1_HUMANYLPmotif-containingprotein1OS=HomosapiensGN=YLPM1PE=1SV=3	0	0	0	254607	0	763820	0	0	0	0	2;2	2;2	2;2	;	2	2	2	2	0	2	0	0	0	0	0	2	0	0	0	0	0	2	0	0	0	0	2.1	2.1	2.1	180.28	1595	1595;1951	0	11.313	0	2.1	0	0
sp|Q96JH8|RADIL_HUMANRas-associatinganddilutedomain-containingproteinOS=HomosapiensGN=RADILPE=1SV=5	sp|Q96JH8|RADIL_HUMANRas-associatinganddilutedomain-containingproteinOS=HomosapiensGN=RADILPE=1SV=5	0	0	0	253257	0	0	759770	0	0	0	1	1	1		1	1	1	1	0	0	1	0	0	0	0	0	1	0	0	0	0	0	1	0	0	0	1.2	1.2	1.2	117.45	1075	1075	0.0021142	6.5123	0	0	1.2	0
sp|P04004|VTNC_HUMANVitronectinOS=HomosapiensGN=VTNPE=1SV=1;CON__Q3ZBS7	sp|P04004|VTNC_HUMANVitronectinOS=HomosapiensGN=VTNPE=1SV=1;CON__Q3ZBS7	0	0	0	247167	0	0	741500	0	0	0	1;1	1;1	1;1	;	2	1	1	1	0	0	1	0	0	0	0	0	1	0	0	0	0	0	1	0	0	0	3.1	3.1	3.1	54.305	478	478;484	0.0058708	6.2127	0	0	3.1	0
sp|Q9P270|SLAI2_HUMANSLAINmotif-containingprotein2OS=HomosapiensGN=SLAIN2PE=1SV=2	sp|Q9P270|SLAI2_HUMANSLAINmotif-containingprotein2OS=HomosapiensGN=SLAIN2PE=1SV=2	0	0	0	235780	0	0	707340	0	0	0	1	1	1		1	1	1	1	0	1	1	0	0	0	0	1	1	0	0	0	0	1	1	0	0	0	2.9	2.9	2.9	62.543	581	581	0.0020202	6.3562	0	2.9	2.9	0
tr|H7C048|H7C048_HUMANSWI/SNF-relatedmatrix-associatedactin-dependentregulatorofchromatinsubfamilyEmember1(Fragment)OS=HomosapiensGN=SMARCE1PE=1SV=1;tr|K7EMQ8|K7EMQ8_HUMANSWI/SNF-relatedmatrix-associatedactin-dependentregulatorofchromatinsubfamilyEmember1(Fragment)OS=HomosapiensGN=SMARCE1PE=1SV=1;tr|J3QKS7|J3QKS7_HUMANSWI/SNF-relatedmatrix-associatedactin-dependentregulatorofchromatinsubfamilyEme…	tr|H7C048|H7C048_HUMANSWI/SNF-relatedmatrix-associatedactin-dependentregulatorofchromatinsubfamilyEmember1(Fragment)OS=HomosapiensGN=SMARCE1PE=1SV=1;tr|K7EMQ8|K7EMQ8_HUMANSWI/SNF-relatedmatrix-associatedactin-dependentregulatorofchromatinsubfamilyEmember1(Fragment)OS=HomosapiensGN=SMARCE1PE=1SV=1;tr|J3QKS7|J3QKS7_HUMANSWI/SNF-relatedmatrix-associatedactin-dependentregulatorofchromatinsubfamilyEme…	0	0	0	235413	0	0	706240	0	0	0	1;1;1;1;1	1;1;1;1;1	1;1;1;1;1	;;;;	5	1	1	1	0	0	1	0	0	0	0	0	1	0	0	0	0	0	1	0	0	0	8.3	8.3	8.3	18.257	157	157;177;288;393;411	0.0056926	6.0513	0	0	8.3	0
sp|Q86U86|PB1_HUMANProteinpolybromo-1OS=HomosapiensGN=PBRM1PE=1SV=1;tr|E7EVG2|E7EVG2_HUMANProteinpolybromo-1(Fragment)OS=HomosapiensGN=PBRM1PE=1SV=5	sp|Q86U86|PB1_HUMANProteinpolybromo-1OS=HomosapiensGN=PBRM1PE=1SV=1;tr|E7EVG2|E7EVG2_HUMANProteinpolybromo-1(Fragment)OS=HomosapiensGN=PBRM1PE=1SV=5	0	0	0	234410	0	703230	0	0	0	0	2;1	2;1	2;1	;	2	2	2	2	0	2	1	0	0	0	0	2	1	0	0	0	0	2	1	0	0	0	1.4	1.4	1.4	192.95	1689	1689;1461	0	12.218	0	1.4	0.8	0
sp|Q9UQE7|SMC3_HUMANStructuralmaintenanceofchromosomesprotein3OS=HomosapiensGN=SMC3PE=1SV=2	sp|Q9UQE7|SMC3_HUMANStructuralmaintenanceofchromosomesprotein3OS=HomosapiensGN=SMC3PE=1SV=2	0	0	0	220553	0	0	661660	0	0	0	2	2	2		1	2	2	2	0	1	2	0	0	0	0	1	2	0	0	0	0	1	2	0	0	0	1.8	1.8	1.8	141.54	1217	1217	0	11.837	0	0.9	1.8	0
sp|P55795|HNRH2_HUMANHeterogeneousnuclearribonucleoproteinH2OS=HomosapiensGN=HNRNPH2PE=1SV=1	sp|P55795|HNRH2_HUMANHeterogeneousnuclearribonucleoproteinH2OS=HomosapiensGN=HNRNPH2PE=1SV=1	0	0	0	219273	0	0	657820	0	0	0	4	1	1		1	4	1	1	2	2	4	2	3	3	0	0	1	0	0	0	0	0	1	0	0	0	12	2.4	2.4	49.263	449	449	1	-2	6	5.8	12	6
tr|H0Y5M2|H0Y5M2_HUMANLethal(3)malignantbraintumor-likeprotein2(Fragment)OS=HomosapiensGN=L3MBTL2PE=1SV=1;sp|Q969R5|LMBL2_HUMANLethal(3)malignantbraintumor-likeprotein2OS=HomosapiensGN=L3MBTL2PE=1SV=1	tr|H0Y5M2|H0Y5M2_HUMANLethal(3)malignantbraintumor-likeprotein2(Fragment)OS=HomosapiensGN=L3MBTL2PE=1SV=1;sp|Q969R5|LMBL2_HUMANLethal(3)malignantbraintumor-likeprotein2OS=HomosapiensGN=L3MBTL2PE=1SV=1	0	0	0	219217	0	657650	0	0	0	0	1;1	1;1	1;1	;	2	1	1	1	0	1	0	0	0	0	0	1	0	0	0	0	0	1	0	0	0	0	4.5	4.5	4.5	32.12	288	288;705	0	6.9411	0	4.5	0	0
sp|P40227|TCPZ_HUMANT-complexprotein1subunitzetaOS=HomosapiensGN=CCT6APE=1SV=3;sp|Q92526|TCPW_HUMANT-complexprotein1subunitzeta-2OS=HomosapiensGN=CCT6BPE=1SV=5	sp|P40227|TCPZ_HUMANT-complexprotein1subunitzetaOS=HomosapiensGN=CCT6APE=1SV=3;sp|Q92526|TCPW_HUMANT-complexprotein1subunitzeta-2OS=HomosapiensGN=CCT6BPE=1SV=5	0	0	0	218973	0	656920	0	0	0	0	2;1	2;1	2;1	;	2	2	2	2	0	1	1	0	0	0	0	1	1	0	0	0	0	1	1	0	0	0	3.6	3.6	3.6	58.024	531	531;530	0	11.957	0	1.9	1.7	0
sp|Q8WXI9|P66B_HUMANTranscriptionalrepressorp66-betaOS=HomosapiensGN=GATAD2BPE=1SV=1	sp|Q8WXI9|P66B_HUMANTranscriptionalrepressorp66-betaOS=HomosapiensGN=GATAD2BPE=1SV=1	0	0	0	210267	0	630800	0	0	0	0	3	3	3		1	3	3	3	0	1	2	0	0	0	0	1	2	0	0	0	0	1	2	0	0	0	6.9	6.9	6.9	65.26	593	593	0	17.743	0	2.2	4.7	0
sp|Q8NC51|PAIRB_HUMANPlasminogenactivatorinhibitor1RNA-bindingproteinOS=HomosapiensGN=SERBP1PE=1SV=2	sp|Q8NC51|PAIRB_HUMANPlasminogenactivatorinhibitor1RNA-bindingproteinOS=HomosapiensGN=SERBP1PE=1SV=2	0	0	0	210117	0	630350	0	0	0	0	1	1	1		1	1	1	1	0	1	0	0	0	0	0	1	0	0	0	0	0	1	0	0	0	0	3.9	3.9	3.9	44.965	408	408	0.0020284	6.3704	0	3.9	0	0
sp|Q8NAV1|PR38A_HUMANPre-mRNA-splicingfactor38AOS=HomosapiensGN=PRPF38APE=1SV=1	sp|Q8NAV1|PR38A_HUMANPre-mRNA-splicingfactor38AOS=HomosapiensGN=PRPF38APE=1SV=1	0	0	0	203103	0	0	609310	0	0	0	2	2	2		1	2	2	2	0	0	1	0	1	0	0	0	1	0	1	0	0	0	1	0	1	0	6.4	6.4	6.4	37.476	312	312	0	12.055	0	0	2.6	0
tr|F5H6E2|F5H6E2_HUMANUnconventionalmyosin-IcOS=HomosapiensGN=MYO1CPE=1SV=1;sp|O00159|MYO1C_HUMANUnconventionalmyosin-IcOS=HomosapiensGN=MYO1CPE=1SV=4	tr|F5H6E2|F5H6E2_HUMANUnconventionalmyosin-IcOS=HomosapiensGN=MYO1CPE=1SV=1;sp|O00159|MYO1C_HUMANUnconventionalmyosin-IcOS=HomosapiensGN=MYO1CPE=1SV=4	0	0	0	200233	0	600700	0	0	0	0	1;1	1;1	1;1	;	2	1	1	1	0	1	0	0	0	0	0	1	0	0	0	0	0	1	0	0	0	0	1	1	1	118.99	1039	1039;1063	0.0039761	6.282	0	1	0	0
sp|A6NKT7|RGPD3_HUMANRanBP2-likeandGRIPdomain-containingprotein3OS=HomosapiensGN=RGPD3PE=3SV=2;tr|J3KNE0|J3KNE0_HUMANRanBP2-likeandGRIPdomain-containingprotein3OS=HomosapiensGN=RGPD3PE=4SV=2;sp|P0DJD0|RGPD1_HUMANRANBP2-likeandGRIPdomain-containingprotein1OS=HomosapiensGN=RGPD1PE=2SV=1;tr|F8VYC4|F8VYC4_HUMANRANBP2-likeandGRIPdomain-containingprotein1OS=HomosapiensGN=RGPD1PE=4SV=1;sp|P0DJD1|RGPD2_H…	sp|A6NKT7|RGPD3_HUMANRanBP2-likeandGRIPdomain-containingprotein3OS=HomosapiensGN=RGPD3PE=3SV=2;tr|J3KNE0|J3KNE0_HUMANRanBP2-likeandGRIPdomain-containingprotein3OS=HomosapiensGN=RGPD3PE=4SV=2;sp|P0DJD0|RGPD1_HUMANRANBP2-likeandGRIPdomain-containingprotein1OS=HomosapiensGN=RGPD1PE=2SV=1;tr|F8VYC4|F8VYC4_HUMANRANBP2-likeandGRIPdomain-containingprotein1OS=HomosapiensGN=RGPD1PE=4SV=1;sp|P0DJD1|RGPD2_H…	0	0	0	199307	0	597920	0	0	0	0	7;7;5;5;5;5;4;4;4;1;1	1;1;0;0;0;1;0;0;0;0;0	1;1;0;0;0;1;0;0;0;0;0	;;;;;;;;	11	7	1	1	0	7	3	0	0	0	0	1	0	0	0	0	0	1	0	0	0	0	4.4	0.7	0.7	197.48	1758	1758;1760;1748;1756;1756;1758;1625;1765;1765;202;904	0.0021097	6.5118	0	4.4	2	0
tr|J3KTA4|J3KTA4_HUMANProbableATP-dependentRNAhelicaseDDX5OS=HomosapiensGN=DDX5PE=1SV=1;sp|P17844|DDX5_HUMANProbableATP-dependentRNAhelicaseDDX5OS=HomosapiensGN=DDX5PE=1SV=1;tr|J3QSF1|J3QSF1_HUMANProbableATP-dependentRNAhelicaseDDX5(Fragment)OS=HomosapiensGN=DDX5PE=1SV=1;tr|J3KRZ1|J3KRZ1_HUMANProbableATP-dependentRNAhelicaseDDX5(Fragment)OS=HomosapiensGN=DDX5PE=1SV=1	tr|J3KTA4|J3KTA4_HUMANProbableATP-dependentRNAhelicaseDDX5OS=HomosapiensGN=DDX5PE=1SV=1;sp|P17844|DDX5_HUMANProbableATP-dependentRNAhelicaseDDX5OS=HomosapiensGN=DDX5PE=1SV=1;tr|J3QSF1|J3QSF1_HUMANProbableATP-dependentRNAhelicaseDDX5(Fragment)OS=HomosapiensGN=DDX5PE=1SV=1;tr|J3KRZ1|J3KRZ1_HUMANProbableATP-dependentRNAhelicaseDDX5(Fragment)OS=HomosapiensGN=DDX5PE=1SV=1	0	0	0	191900	0	0	575700	0	0	0	4;4;2;2	2;2;1;1	2;2;1;1	;;;	4	4	2	2	1	3	2	1	1	2	0	1	1	0	0	0	0	1	1	0	0	0	6.8	3.1	3.1	69.086	614	614;614;153;166	0	11.078	2	5.5	3.3	2
tr|M0R3F1|M0R3F1_HUMANHeterogeneousnuclearribonucleoproteinU-likeprotein1(Fragment)OS=HomosapiensGN=HNRNPUL1PE=1SV=1;tr|A0A0A0MRA5|A0A0A0MRA5_HUMANHeterogeneousnuclearribonucleoproteinU-likeprotein1OS=HomosapiensGN=HNRNPUL1PE=1SV=1;tr|B7Z4B8|B7Z4B8_HUMANHeterogeneousnuclearribonucleoproteinU-likeprotein1OS=HomosapiensGN=HNRNPUL1PE=1SV=1;sp|Q9BUJ2|HNRL1_HUMANHeterogeneousnuclearribonucleoproteinU-…	tr|M0R3F1|M0R3F1_HUMANHeterogeneousnuclearribonucleoproteinU-likeprotein1(Fragment)OS=HomosapiensGN=HNRNPUL1PE=1SV=1;tr|A0A0A0MRA5|A0A0A0MRA5_HUMANHeterogeneousnuclearribonucleoproteinU-likeprotein1OS=HomosapiensGN=HNRNPUL1PE=1SV=1;tr|B7Z4B8|B7Z4B8_HUMANHeterogeneousnuclearribonucleoproteinU-likeprotein1OS=HomosapiensGN=HNRNPUL1PE=1SV=1;sp|Q9BUJ2|HNRL1_HUMANHeterogeneousnuclearribonucleoproteinU-…	0	0	0	183017	0	0	549050	0	0	0	2;2;2;2;1;1;1	2;2;2;2;1;1;1	2;2;2;2;1;1;1	;;;;;;	7	2	2	2	0	1	1	0	0	0	0	1	1	0	0	0	0	1	1	0	0	0	3.1	3.1	3.1	71.611	641	641;766;767;856;90;172;371	0	11.501	0	1.1	2	0
sp|Q15427|SF3B4_HUMANSplicingfactor3Bsubunit4OS=HomosapiensGN=SF3B4PE=1SV=1	sp|Q15427|SF3B4_HUMANSplicingfactor3Bsubunit4OS=HomosapiensGN=SF3B4PE=1SV=1	0	0	0	177027	0	0	531080	0	0	0	1	1	1		1	1	1	1	0	1	1	0	0	0	0	1	1	0	0	0	0	1	1	0	0	0	3.3	3.3	3.3	44.385	424	424	0	6.945	0	3.3	3.3	0
sp|Q12906|ILF3_HUMANInterleukinenhancer-bindingfactor3OS=HomosapiensGN=ILF3PE=1SV=3;tr|K7EQR9|K7EQR9_HUMANInterleukinenhancer-bindingfactor3(Fragment)OS=HomosapiensGN=ILF3PE=1SV=1;tr|K7EKJ9|K7EKJ9_HUMANInterleukinenhancer-bindingfactor3(Fragment)OS=HomosapiensGN=ILF3PE=1SV=1	sp|Q12906|ILF3_HUMANInterleukinenhancer-bindingfactor3OS=HomosapiensGN=ILF3PE=1SV=3;tr|K7EQR9|K7EQR9_HUMANInterleukinenhancer-bindingfactor3(Fragment)OS=HomosapiensGN=ILF3PE=1SV=1;tr|K7EKJ9|K7EKJ9_HUMANInterleukinenhancer-bindingfactor3(Fragment)OS=HomosapiensGN=ILF3PE=1SV=1	0	0	0	173397	0	0	520190	0	0	0	2;1;1	2;1;1	2;1;1	;;	3	2	2	2	0	0	1	0	1	0	0	0	1	0	1	0	0	0	1	0	1	0	3.4	3.4	3.4	95.337	894	894;180;254	0	11.36	0	0	1.3	0
tr|A0A087X0K9|A0A087X0K9_HUMANTightjunctionproteinZO-1OS=HomosapiensGN=TJP1PE=1SV=1;tr|G5E9E7|G5E9E7_HUMANTightjunctionprotein1(Zonaoccludens1),isoformCRA_eOS=HomosapiensGN=TJP1PE=1SV=1;sp|Q07157|ZO1_HUMANTightjunctionproteinZO-1OS=HomosapiensGN=TJP1PE=1SV=3;tr|G3V1L9|G3V1L9_HUMANTightjunctionprotein1(Zonaoccludens1),isoformCRA_aOS=HomosapiensGN=TJP1PE=1SV=1	tr|A0A087X0K9|A0A087X0K9_HUMANTightjunctionproteinZO-1OS=HomosapiensGN=TJP1PE=1SV=1;tr|G5E9E7|G5E9E7_HUMANTightjunctionprotein1(Zonaoccludens1),isoformCRA_eOS=HomosapiensGN=TJP1PE=1SV=1;sp|Q07157|ZO1_HUMANTightjunctionproteinZO-1OS=HomosapiensGN=TJP1PE=1SV=3;tr|G3V1L9|G3V1L9_HUMANTightjunctionprotein1(Zonaoccludens1),isoformCRA_aOS=HomosapiensGN=TJP1PE=1SV=1	0	0	0	170443	0	0	511330	0	0	0	1;1;1;1	1;1;1;1	1;1;1;1	;;;	4	1	1	1	0	0	1	0	0	0	0	0	1	0	0	0	0	0	1	0	0	0	1.1	1.1	1.1	187.85	1676	1676;1692;1748;1768	0.0020921	6.4933	0	0	1.1	0
sp|Q6N021|TET2_HUMANMethylcytosinedioxygenaseTET2OS=HomosapiensGN=TET2PE=1SV=3;tr|E7EQS8|E7EQS8_HUMANMethylcytosinedioxygenaseTET2OS=HomosapiensGN=TET2PE=1SV=1	sp|Q6N021|TET2_HUMANMethylcytosinedioxygenaseTET2OS=HomosapiensGN=TET2PE=1SV=3;tr|E7EQS8|E7EQS8_HUMANMethylcytosinedioxygenaseTET2OS=HomosapiensGN=TET2PE=1SV=1	0	0	0	151003	0	453010	0	0	0	0	1;1	1;1	1;1	;	2	1	1	1	0	1	0	0	0	0	0	1	0	0	0	0	0	1	0	0	0	0	0.4	0.4	0.4	223.81	2002	2002;2023	0.003992	6.2934	0	0.4	0	0
sp|Q86UP3|ZFHX4_HUMANZincfingerhomeoboxprotein4OS=HomosapiensGN=ZFHX4PE=1SV=1;tr|E7EVZ1|E7EVZ1_HUMANZincfingerhomeoboxprotein4OS=HomosapiensGN=ZFHX4PE=1SV=1;sp|Q15911|ZFHX3_HUMANZincfingerhomeoboxprotein3OS=HomosapiensGN=ZFHX3PE=1SV=2	sp|Q86UP3|ZFHX4_HUMANZincfingerhomeoboxprotein4OS=HomosapiensGN=ZFHX4PE=1SV=1;tr|E7EVZ1|E7EVZ1_HUMANZincfingerhomeoboxprotein4OS=HomosapiensGN=ZFHX4PE=1SV=1;sp|Q15911|ZFHX3_HUMANZincfingerhomeoboxprotein3OS=HomosapiensGN=ZFHX3PE=1SV=2	0	0	0	144790	0	0	434370	0	0	0	1;1;1	1;1;1	1;1;1	;;	3	1	1	1	0	1	1	0	0	0	0	1	1	0	0	0	0	1	1	0	0	0	0.3	0.3	0.3	393.73	3567	3567;3590;3703	0.0020121	6.3242	0	0.3	0.3	0
sp|P62699|YPEL5_HUMANProteinyippee-like5OS=HomosapiensGN=YPEL5PE=1SV=1	sp|P62699|YPEL5_HUMANProteinyippee-like5OS=HomosapiensGN=YPEL5PE=1SV=1	0	0	0	129677	0	0	389030	0	0	0	2	2	2		1	2	2	2	0	0	2	0	0	0	0	0	2	0	0	0	0	0	2	0	0	0	18.2	18.2	18.2	13.841	121	121	0	11.454	0	0	18.2	0
tr|J3QRX9|J3QRX9_HUMANCoordinatorofPRMT5anddifferentiationstimulatorOS=HomosapiensGN=COPRSPE=1SV=1;tr|J3QRX4|J3QRX4_HUMANCoordinatorofPRMT5anddifferentiationstimulatorOS=HomosapiensGN=COPRSPE=1SV=1;sp|Q9NQ92|COPRS_HUMANCoordinatorofPRMT5anddifferentiationstimulatorOS=HomosapiensGN=COPRSPE=1SV=3	tr|J3QRX9|J3QRX9_HUMANCoordinatorofPRMT5anddifferentiationstimulatorOS=HomosapiensGN=COPRSPE=1SV=1;tr|J3QRX4|J3QRX4_HUMANCoordinatorofPRMT5anddifferentiationstimulatorOS=HomosapiensGN=COPRSPE=1SV=1;sp|Q9NQ92|COPRS_HUMANCoordinatorofPRMT5anddifferentiationstimulatorOS=HomosapiensGN=COPRSPE=1SV=3	0	0	0	129250	0	0	387750	0	0	0	1;1;1	1;1;1	1;1;1	;;	3	1	1	1	0	1	1	0	0	0	0	1	1	0	0	0	0	1	1	0	0	0	26.5	26.5	26.5	7.2945	68	68;82;184	0.0021053	6.5027	0	26.5	26.5	0
sp|O15294|OGT1_HUMANUDP-N-acetylglucosamine--peptideN-acetylglucosaminyltransferase110kDasubunitOS=HomosapiensGN=OGTPE=1SV=3	sp|O15294|OGT1_HUMANUDP-N-acetylglucosamine--peptideN-acetylglucosaminyltransferase110kDasubunitOS=HomosapiensGN=OGTPE=1SV=3	0	0	0	128467	0	385400	0	0	0	0	1	1	1		1	1	1	1	0	1	0	0	0	0	0	1	0	0	0	0	0	1	0	0	0	0	1.6	1.6	1.6	116.92	1046	1046	1	-2	0	1.6	0	0
tr|A0A0A0MSP6|A0A0A0MSP6_HUMANSerrateRNAeffectormoleculehomolog(Fragment)OS=HomosapiensGN=SRRTPE=1SV=3;tr|H7C3A1|H7C3A1_HUMANSerrateRNAeffectormoleculehomolog(Fragment)OS=HomosapiensGN=SRRTPE=1SV=1;sp|Q9BXP5|SRRT_HUMANSerrateRNAeffectormoleculehomologOS=HomosapiensGN=SRRTPE=1SV=1	tr|A0A0A0MSP6|A0A0A0MSP6_HUMANSerrateRNAeffectormoleculehomolog(Fragment)OS=HomosapiensGN=SRRTPE=1SV=3;tr|H7C3A1|H7C3A1_HUMANSerrateRNAeffectormoleculehomolog(Fragment)OS=HomosapiensGN=SRRTPE=1SV=1;sp|Q9BXP5|SRRT_HUMANSerrateRNAeffectormoleculehomologOS=HomosapiensGN=SRRTPE=1SV=1	0	0	0	119787	0	0	359360	0	0	0	1;1;1	1;1;1	1;1;1	;;	3	1	1	1	0	0	1	0	0	0	0	0	1	0	0	0	0	0	1	0	0	0	8.7	8.7	8.7	16.536	149	149;499;876	0.0020964	6.5012	0	0	8.7	0
sp|P61981|1433G_HUMAN14-3-3proteingammaOS=HomosapiensGN=YWHAGPE=1SV=2	sp|P61981|1433G_HUMAN14-3-3proteingammaOS=HomosapiensGN=YWHAGPE=1SV=2	0	0	0	113897	0	0	341690	0	0	0	3	2	2		1	3	2	2	2	0	1	0	0	0	1	0	1	0	0	0	1	0	1	0	0	0	13.8	9.7	9.7	28.302	247	247	0	12.73	8.1	0	5.7	0
sp|O15020|SPTN2_HUMANSpectrinbetachain,non-erythrocytic2OS=HomosapiensGN=SPTBN2PE=1SV=3	sp|O15020|SPTN2_HUMANSpectrinbetachain,non-erythrocytic2OS=HomosapiensGN=SPTBN2PE=1SV=3	0	0	0	113450	0	0	340350	0	0	0	6	1	1		1	6	1	1	0	5	3	0	0	0	0	0	1	0	0	0	0	0	1	0	0	0	3	0.4	0.4	271.32	2390	2390	1	-2	0	2.6	1.3	0
sp|Q10570|CPSF1_HUMANCleavageandpolyadenylationspecificityfactorsubunit1OS=HomosapiensGN=CPSF1PE=1SV=2	sp|Q10570|CPSF1_HUMANCleavageandpolyadenylationspecificityfactorsubunit1OS=HomosapiensGN=CPSF1PE=1SV=2	0	0	0	111213	0	333640	0	0	0	0	2	2	2		1	2	2	2	0	1	1	0	0	0	0	1	1	0	0	0	0	1	1	0	0	0	1.9	1.9	1.9	160.88	1443	1443	0	11.114	0	1.2	0.7	0
sp|Q96S59|RANB9_HUMANRan-bindingprotein9OS=HomosapiensGN=RANBP9PE=1SV=1	sp|Q96S59|RANB9_HUMANRan-bindingprotein9OS=HomosapiensGN=RANBP9PE=1SV=1	0	0	0	106023	0	318070	0	0	0	0	1	1	1		1	1	1	1	0	1	0	0	0	0	0	1	0	0	0	0	0	1	0	0	0	0	1.9	1.9	1.9	77.846	729	729	0.0039293	6.2309	0	1.9	0	0
sp|Q15459|SF3A1_HUMANSplicingfactor3Asubunit1OS=HomosapiensGN=SF3A1PE=1SV=1;tr|F8WC79|F8WC79_HUMANSplicingfactor3Asubunit1OS=HomosapiensGN=SF3A1PE=1SV=1;tr|F8WB66|F8WB66_HUMANSplicingfactor3Asubunit1OS=HomosapiensGN=SF3A1PE=1SV=1	sp|Q15459|SF3A1_HUMANSplicingfactor3Asubunit1OS=HomosapiensGN=SF3A1PE=1SV=1;tr|F8WC79|F8WC79_HUMANSplicingfactor3Asubunit1OS=HomosapiensGN=SF3A1PE=1SV=1;tr|F8WB66|F8WB66_HUMANSplicingfactor3Asubunit1OS=HomosapiensGN=SF3A1PE=1SV=1	0	0	0	104747	0	0	314240	0	0	0	2;1;1	2;1;1	2;1;1	;;	3	2	2	2	0	1	1	0	0	0	0	1	1	0	0	0	0	1	1	0	0	0	3.4	3.4	3.4	88.885	793	793;38;63	0	11.996	0	1	2.4	0
sp|Q96ST3|SIN3A_HUMANPairedamphipathichelixproteinSin3aOS=HomosapiensGN=SIN3APE=1SV=2	sp|Q96ST3|SIN3A_HUMANPairedamphipathichelixproteinSin3aOS=HomosapiensGN=SIN3APE=1SV=2	0	0	0	92540	0	277620	0	0	0	0	1	1	1		1	1	1	1	0	1	0	0	0	0	0	1	0	0	0	0	0	1	0	0	0	0	1	1	1	145.17	1273	1273	0.0020877	6.4713	0	1	0	0
sp|P12273|PIP_HUMANProlactin-inducibleproteinOS=HomosapiensGN=PIPPE=1SV=1	sp|P12273|PIP_HUMANProlactin-inducibleproteinOS=HomosapiensGN=PIPPE=1SV=1	0	0	0	91263.3	0	273790	0	0	0	0	1	1	1		1	1	1	1	0	1	0	0	0	0	0	1	0	0	0	0	0	1	0	0	0	0	8.2	8.2	8.2	16.572	146	146	0.0020325	6.3721	0	8.2	0	0
tr|R4GMX7|R4GMX7_HUMANRan-bindingprotein10OS=HomosapiensGN=RANBP10PE=1SV=1;tr|R4GNA3|R4GNA3_HUMANRan-bindingprotein10OS=HomosapiensGN=RANBP10PE=1SV=1;tr|R4GN91|R4GN91_HUMANRan-bindingprotein10OS=HomosapiensGN=RANBP10PE=1SV=1;tr|A0A0D9SEU5|A0A0D9SEU5_HUMANRan-bindingprotein10OS=HomosapiensGN=RANBP10PE=1SV=1;sp|Q6VN20|RBP10_HUMANRan-bindingprotein10OS=HomosapiensGN=RANBP10PE=1SV=1;tr|R4GMX8|R4GMX8_…	tr|R4GMX7|R4GMX7_HUMANRan-bindingprotein10OS=HomosapiensGN=RANBP10PE=1SV=1;tr|R4GNA3|R4GNA3_HUMANRan-bindingprotein10OS=HomosapiensGN=RANBP10PE=1SV=1;tr|R4GN91|R4GN91_HUMANRan-bindingprotein10OS=HomosapiensGN=RANBP10PE=1SV=1;tr|A0A0D9SEU5|A0A0D9SEU5_HUMANRan-bindingprotein10OS=HomosapiensGN=RANBP10PE=1SV=1;sp|Q6VN20|RBP10_HUMANRan-bindingprotein10OS=HomosapiensGN=RANBP10PE=1SV=1;tr|R4GMX8|R4GMX8_…	0	0	0	68953.3	0	206860	0	0	0	0	1;1;1;1;1;1	1;1;1;1;1;1	1;1;1;1;1;1	;;;;;	6	1	1	1	0	1	0	0	0	0	0	1	0	0	0	0	0	1	0	0	0	0	17.1	17.1	17.1	8.7355	82	82;126;149;620;620;650	0.0020408	6.3787	0	17.1	0	0
sp|Q9Y4E8|UBP15_HUMANUbiquitincarboxyl-terminalhydrolase15OS=HomosapiensGN=USP15PE=1SV=3	sp|Q9Y4E8|UBP15_HUMANUbiquitincarboxyl-terminalhydrolase15OS=HomosapiensGN=USP15PE=1SV=3	0	0	0	52610	0	157830	0	0	0	0	1	1	1		1	1	1	1	0	1	0	0	0	0	0	1	0	0	0	0	0	1	0	0	0	0	1.2	1.2	1.2	112.42	981	981	0	9.1074	0	1.2	0	0
alt-RBM10	alt-RBM10	2297400	0	0	1	0	0	0	2297400	0	0	1	1	1		1	1	1	1	0	0	0	1	0	0	0	0	0	1	0	0	0	0	0	1	0	0	11.9	11.9	11.9	14.721	134	134	0	16.408	0	0	0	11.9
sp|P07477|TRY1_HUMANTrypsin-1OS=HomosapiensGN=PRSS1PE=1SV=1;CON__P07477;tr|E7EQ64|E7EQ64_HUMANTrypsin-1OS=HomosapiensGN=PRSS1PE=1SV=1;tr|H0Y8D1|H0Y8D1_HUMANTrypsin-1(Fragment)OS=HomosapiensGN=PRSS1PE=1SV=1;tr|A0A087WW55|A0A087WW55_HUMANTrypsin-1OS=HomosapiensGN=PRSS1PE=1SV=1;sp|Q8NHM4|TRY6_HUMANPutativetrypsin-6OS=HomosapiensGN=PRSS3P2PE=5SV=2;sp|P07478|TRY2_HUMANTrypsin-2OS=HomosapiensGN=PRSS2PE…	sp|P07477|TRY1_HUMANTrypsin-1OS=HomosapiensGN=PRSS1PE=1SV=1;CON__P07477;tr|E7EQ64|E7EQ64_HUMANTrypsin-1OS=HomosapiensGN=PRSS1PE=1SV=1;tr|H0Y8D1|H0Y8D1_HUMANTrypsin-1(Fragment)OS=HomosapiensGN=PRSS1PE=1SV=1;tr|A0A087WW55|A0A087WW55_HUMANTrypsin-1OS=HomosapiensGN=PRSS1PE=1SV=1;sp|Q8NHM4|TRY6_HUMANPutativetrypsin-6OS=HomosapiensGN=PRSS3P2PE=5SV=2;sp|P07478|TRY2_HUMANTrypsin-2OS=HomosapiensGN=PRSS2PE…	2134600000	0	0	1	0	0	0	2134600000	0	0	2;2;2;1;1;1;1	1;1;1;1;1;1;1	1;1;1;1;1;1;1	;;;;;;	7	2	1	1	1	2	1	1	1	0	1	1	1	1	1	0	1	1	1	1	1	0	11.3	8.1	8.1	26.558	247	247;247;261;142;247;247;247	0	53.439	8.1	11.3	8.1	8.1
sp|P08779|K1C16_HUMANKeratin,typeIcytoskeletal16OS=HomosapiensGN=KRT16PE=1SV=4;CON__P08779;tr|K7ENW6|K7ENW6_HUMANKeratin,typeIcytoskeletal16(Fragment)OS=HomosapiensGN=KRT16PE=1SV=1	sp|P08779|K1C16_HUMANKeratin,typeIcytoskeletal16OS=HomosapiensGN=KRT16PE=1SV=4;CON__P08779	3199400	0	0	1	0	0	0	3199400	0	0	11;11;1	3;3;1	3;3;1	;	3	11	3	3	1	6	8	8	0	0	0	1	2	2	0	0	0	1	2	2	0	0	23	11	11	51.267	473	473;473;162	0	19.218	1.9	11.6	17.5	17.1
sp|Q14CN4|K2C72_HUMANKeratin,typeIIcytoskeletal72OS=HomosapiensGN=KRT72PE=1SV=2;CON__Q14CN4-1;CON__Q6IME9;sp|Q3SY84|K2C71_HUMANKeratin,typeIIcytoskeletal71OS=HomosapiensGN=KRT71PE=1SV=3;CON__Q3SY84;sp|Q7RTS7|K2C74_HUMANKeratin,typeIIcytoskeletal74OS=HomosapiensGN=KRT74PE=1SV=2;CON__Q7RTS7;sp|Q86Y46|K2C73_HUMANKeratin,typeIIcytoskeletal73OS=HomosapiensGN=KRT73PE=1SV=1;CON__Q32MB2;tr|F8W1S1|F8W1S1_…	sp|Q14CN4|K2C72_HUMANKeratin,typeIIcytoskeletal72OS=HomosapiensGN=KRT72PE=1SV=2;CON__Q14CN4-1;CON__Q6IME9;sp|Q3SY84|K2C71_HUMANKeratin,typeIIcytoskeletal71OS=HomosapiensGN=KRT71PE=1SV=3;CON__Q3SY84;sp|Q7RTS7|K2C74_HUMANKeratin,typeIIcytoskeletal74OS=HomosapiensGN=KRT74PE=1SV=2;CON__Q7RTS7;sp|Q86Y46|K2C73_HUMANKeratin,typeIIcytoskeletal73OS=HomosapiensGN=KRT73PE=1SV=1;CON__Q32MB2;tr|F8W1S1|F8W1S1_…	555420	0	0	1	0	0	0	555420	0	0	3;3;3;3;3;3;3;3;3;3;1	1;1;1;1;1;1;1;1;1;1;1	1;1;1;1;1;1;1;1;1;1;1	;;;;;;;;;	11	3	1	1	1	2	1	2	0	0	0	1	1	1	0	0	0	1	1	1	0	0	4.1	2.3	2.3	55.877	511	511;511;520;523;523;529;529;540;540;543;192	0	6.9491	1.4	4.1	2.3	3.7
REV__tr|A6NI74|A6NI74_HUMANEnolase-likeproteinENO4OS=HomosapiensGN=ENO4PE=4SV=1;REV__tr|J3KNX1|J3KNX1_HUMANEnolase-likeproteinENO4OS=HomosapiensGN=ENO4PE=4SV=2;REV__tr|A0A087WZY6|A0A087WZY6_HUMANEnolase-likeproteinENO4OS=HomosapiensGN=ENO4PE=4SV=1;REV__sp|A6NNW6|ENO4_HUMANEnolase-likeproteinENO4OS=HomosapiensGN=ENO4PE=2SV=2	REV__tr|A6NI74|A6NI74_HUMANEnolase-likeproteinENO4OS=HomosapiensGN=ENO4PE=4SV=1;REV__tr|J3KNX1|J3KNX1_HUMANEnolase-likeproteinENO4OS=HomosapiensGN=ENO4PE=4SV=2;REV__tr|A0A087WZY6|A0A087WZY6_HUMANEnolase-likeproteinENO4OS=HomosapiensGN=ENO4PE=4SV=1;REV__sp|A6NNW6|ENO4_HUMANEnolase-likeproteinENO4OS=HomosapiensGN=ENO4PE=2SV=2	4254100	0	0	1	0	0	0	4254100	0	0	1;1;1;1	1;1;1;1	1;1;1;1	;;;	4	1	1	1	0	0	0	1	0	0	0	0	0	1	0	0	0	0	0	1	0	0	0	0	0	39.641	363	363;625;628;628	0.0040161	6.3166	0	0	0	0
sp|A6NHQ2|FBLL1_HUMANrRNA/tRNA2'-O-methyltransferasefibrillarin-likeprotein1OS=HomosapiensGN=FBLL1PE=3SV=2	sp|A6NHQ2|FBLL1_HUMANrRNA/tRNA2'-O-methyltransferasefibrillarin-likeprotein1OS=HomosapiensGN=FBLL1PE=3SV=2	64782000	0	0	1	0	0	0	64782000	0	0	3	1	1		1	3	1	1	0	0	0	3	3	1	0	0	0	1	1	0	0	0	0	1	1	0	11.1	3.3	3.3	34.803	334	334	0	6.9989	0	0	0	11.1
tr|A0A087WTB6|A0A087WTB6_HUMANGuaninenucleotide-bindingproteinG(o)subunitalphaOS=HomosapiensGN=GNAO1PE=1SV=1;tr|A2A2R6|A2A2R6_HUMANGuaninenucleotide-bindingproteinG(s)subunitalphaisoformsshort(Fragment)OS=HomosapiensGN=GNASPE=1SV=1;tr|Q5JWD1|Q5JWD1_HUMANGuaninenucleotide-bindingproteinG(s)subunitalphaisoformsshortOS=HomosapiensGN=GNASPE=1SV=1;tr|H0Y7E8|H0Y7E8_HUMANGuaninenucleotide-bindingprotein…	tr|A0A087WTB6|A0A087WTB6_HUMANGuaninenucleotide-bindingproteinG(o)subunitalphaOS=HomosapiensGN=GNAO1PE=1SV=1;tr|A2A2R6|A2A2R6_HUMANGuaninenucleotide-bindingproteinG(s)subunitalphaisoformsshort(Fragment)OS=HomosapiensGN=GNASPE=1SV=1;tr|Q5JWD1|Q5JWD1_HUMANGuaninenucleotide-bindingproteinG(s)subunitalphaisoformsshortOS=HomosapiensGN=GNASPE=1SV=1;tr|H0Y7E8|H0Y7E8_HUMANGuaninenucleotide-bindingprotein…	4890600	0	0	1	0	0	0	4890600	0	0	1;1;1;1;1;1;1;1;1;1;1;1;1;1;1;1;1	1;1;1;1;1;1;1;1;1;1;1;1;1;1;1;1;1	1;1;1;1;1;1;1;1;1;1;1;1;1;1;1;1;1	;;;;;;;;;;;;;;;;	17	1	1	1	0	1	0	1	0	0	0	1	0	1	0	0	0	1	0	1	0	0	20.4	20.4	20.4	5.7186	54	54;61;87;93;124;193;199;350;354;354;354;354;354;355;381;394;1037	0	6.8182	0	20.4	0	20.4
tr|A0A0A0MTD4|A0A0A0MTD4_HUMANWDrepeat-containingprotein64(Fragment)OS=HomosapiensGN=WDR64PE=4SV=1;tr|H0Y6L4|H0Y6L4_HUMANWDrepeat-containingprotein64(Fragment)OS=HomosapiensGN=WDR64PE=4SV=1;tr|A0A0C4DG52|A0A0C4DG52_HUMANWDrepeat-containingprotein64OS=HomosapiensGN=WDR64PE=4SV=1;tr|A0A0A0MSY1|A0A0A0MSY1_HUMANWDrepeat-containingprotein64(Fragment)OS=HomosapiensGN=WDR64PE=4SV=1;sp|B1ANS9|WDR64_HUMAN…	tr|A0A0A0MTD4|A0A0A0MTD4_HUMANWDrepeat-containingprotein64(Fragment)OS=HomosapiensGN=WDR64PE=4SV=1;tr|H0Y6L4|H0Y6L4_HUMANWDrepeat-containingprotein64(Fragment)OS=HomosapiensGN=WDR64PE=4SV=1;tr|A0A0C4DG52|A0A0C4DG52_HUMANWDrepeat-containingprotein64OS=HomosapiensGN=WDR64PE=4SV=1;tr|A0A0A0MSY1|A0A0A0MSY1_HUMANWDrepeat-containingprotein64(Fragment)OS=HomosapiensGN=WDR64PE=4SV=1;sp|B1ANS9|WDR64_HUMAN…	2921900	0	0	1	0	0	0	2921900	0	0	1;1;1;1;1	1;1;1;1;1	1;1;1;1;1	;;;;	5	1	1	1	0	0	0	1	0	0	0	0	0	1	0	0	0	0	0	1	0	0	2.1	2.1	2.1	60.04	522	522;560;634;685;1081	0.0057471	6.1071	0	0	0	2.1
sp|B4DZS4|T11X1_HUMANT-complexprotein11X-linkedprotein1OS=HomosapiensGN=TCP11X1PE=2SV=1;sp|Q5H9J9|T11X2_HUMANT-complexprotein11X-linkedprotein2OS=HomosapiensGN=TCP11X2PE=3SV=1	sp|B4DZS4|T11X1_HUMANT-complexprotein11X-linkedprotein1OS=HomosapiensGN=TCP11X1PE=2SV=1;sp|Q5H9J9|T11X2_HUMANT-complexprotein11X-linkedprotein2OS=HomosapiensGN=TCP11X2PE=3SV=1	1456400	0	0	1	0	0	0	1456400	0	0	1;1	1;1	1;1	;	2	1	1	1	0	0	0	1	0	0	0	0	0	1	0	0	0	0	0	1	0	0	3.8	3.8	3.8	34.563	312	312;407	0.002045	6.3858	0	0	0	3.8
tr|F8VZJ2|F8VZJ2_HUMANNascentpolypeptide-associatedcomplexsubunitalphaOS=HomosapiensGN=NACAPE=1SV=1;tr|F8W0W4|F8W0W4_HUMANNascentpolypeptide-associatedcomplexsubunitalpha(Fragment)OS=HomosapiensGN=NACAPE=1SV=1;tr|H0YHX9|H0YHX9_HUMANNascentpolypeptide-associatedcomplexsubunitalpha(Fragment)OS=HomosapiensGN=NACAPE=1SV=1;sp|Q13765|NACA_HUMANNascentpolypeptide-associatedcomplexsubunitalphaOS=Homosapi…	tr|F8VZJ2|F8VZJ2_HUMANNascentpolypeptide-associatedcomplexsubunitalphaOS=HomosapiensGN=NACAPE=1SV=1;tr|F8W0W4|F8W0W4_HUMANNascentpolypeptide-associatedcomplexsubunitalpha(Fragment)OS=HomosapiensGN=NACAPE=1SV=1;tr|H0YHX9|H0YHX9_HUMANNascentpolypeptide-associatedcomplexsubunitalpha(Fragment)OS=HomosapiensGN=NACAPE=1SV=1;sp|Q13765|NACA_HUMANNascentpolypeptide-associatedcomplexsubunitalphaOS=Homosapi…	15662000	0	0	1	0	0	0	15662000	0	0	4;4;4;4;4;3;3;1;1	4;4;4;4;4;3;3;1;1	4;4;4;4;4;3;3;1;1	;;;;;;	9	4	4	4	0	0	0	4	0	0	0	0	0	4	0	0	0	0	0	4	0	0	40.4	40.4	40.4	15.016	136	136;198;213;215;2078;71;148;126;213	0	94.445	0	0	0	40.4
sp|O00170|AIP_HUMANAHreceptor-interactingproteinOS=HomosapiensGN=AIPPE=1SV=2	sp|O00170|AIP_HUMANAHreceptor-interactingproteinOS=HomosapiensGN=AIPPE=1SV=2	1149500	0	0	1	0	0	0	1149500	0	0	1	1	1		1	1	1	1	0	0	0	1	0	0	0	0	0	1	0	0	0	0	0	1	0	0	4.2	4.2	4.2	37.636	330	330	0	6.9092	0	0	0	4.2
sp|O14646|CHD1_HUMANChromodomain-helicase-DNA-bindingprotein1OS=HomosapiensGN=CHD1PE=1SV=2	sp|O14646|CHD1_HUMANChromodomain-helicase-DNA-bindingprotein1OS=HomosapiensGN=CHD1PE=1SV=2	7423100	0	0	1	0	0	0	7423100	0	0	1	1	1		1	1	1	1	0	0	0	1	0	0	0	0	0	1	0	0	0	0	0	1	0	0	0.8	0.8	0.8	196.69	1710	1710	0.0021231	6.5243	0	0	0	0.8
tr|A0A087WUK2|A0A087WUK2_HUMANHeterogeneousnuclearribonucleoproteinD-likeOS=HomosapiensGN=HNRNPDLPE=1SV=1;sp|O14979|HNRDL_HUMANHeterogeneousnuclearribonucleoproteinD-likeOS=HomosapiensGN=HNRNPDLPE=1SV=3	tr|A0A087WUK2|A0A087WUK2_HUMANHeterogeneousnuclearribonucleoproteinD-likeOS=HomosapiensGN=HNRNPDLPE=1SV=1;sp|O14979|HNRDL_HUMANHeterogeneousnuclearribonucleoproteinD-likeOS=HomosapiensGN=HNRNPDLPE=1SV=3	5233500	0	0	1	0	0	0	5233500	0	0	2;2	2;2	2;2	;	2	2	2	2	0	0	0	2	0	0	0	0	0	2	0	0	0	0	0	2	0	0	7.7	7.7	7.7	40.04	363	363;420	0	22.822	0	0	0	7.7
tr|H0YNE4|H0YNE4_HUMANProteinregulatorofcytokinesis1(Fragment)OS=HomosapiensGN=PRC1PE=1SV=1;tr|G3V3N7|G3V3N7_HUMANProteinregulatorofcytokinesis1(Fragment)OS=HomosapiensGN=PRC1PE=1SV=2;sp|O43663|PRC1_HUMANProteinregulatorofcytokinesis1OS=HomosapiensGN=PRC1PE=1SV=2	tr|H0YNE4|H0YNE4_HUMANProteinregulatorofcytokinesis1(Fragment)OS=HomosapiensGN=PRC1PE=1SV=1;tr|G3V3N7|G3V3N7_HUMANProteinregulatorofcytokinesis1(Fragment)OS=HomosapiensGN=PRC1PE=1SV=2;sp|O43663|PRC1_HUMANProteinregulatorofcytokinesis1OS=HomosapiensGN=PRC1PE=1SV=2	1574100	0	0	1	0	0	0	1574100	0	0	1;1;1	1;1;1	1;1;1	;;	3	1	1	1	1	0	0	1	0	0	1	0	0	1	0	0	1	0	0	1	0	0	21.9	21.9	21.9	6.4993	64	64;238;620	0.0058027	6.1191	21.9	0	0	21.9
tr|H7C0E6|H7C0E6_HUMANRNA/RNPcomplex-1-interactingphosphatase(Fragment)OS=HomosapiensGN=DUSP11PE=1SV=1;tr|C9JYA6|C9JYA6_HUMANRNA/RNPcomplex-1-interactingphosphataseOS=HomosapiensGN=DUSP11PE=1SV=1;sp|O75319|DUS11_HUMANRNA/RNPcomplex-1-interactingphosphataseOS=HomosapiensGN=DUSP11PE=1SV=1	tr|H7C0E6|H7C0E6_HUMANRNA/RNPcomplex-1-interactingphosphatase(Fragment)OS=HomosapiensGN=DUSP11PE=1SV=1;tr|C9JYA6|C9JYA6_HUMANRNA/RNPcomplex-1-interactingphosphataseOS=HomosapiensGN=DUSP11PE=1SV=1;sp|O75319|DUS11_HUMANRNA/RNPcomplex-1-interactingphosphataseOS=HomosapiensGN=DUSP11PE=1SV=1	0	3374300	0	1	0	0	0	0	3374300	0	2;2;2	2;2;2	2;2;2	;;	3	2	2	2	0	0	0	0	2	0	0	0	0	0	2	0	0	0	0	0	2	0	20.7	20.7	20.7	17.774	150	150;273;330	0	11.966	0	0	0	0
sp|O75461|E2F6_HUMANTranscriptionfactorE2F6OS=HomosapiensGN=E2F6PE=1SV=1;tr|Q2Z196|Q2Z196_HUMANPutativetruncatedtranscriptionfactorE2F6OS=HomosapiensGN=E2F6PE=1SV=1;tr|Q2Z197|Q2Z197_HUMANPutativetruncatedtranscriptionfactorE2F6OS=HomosapiensGN=E2F6PE=1SV=1;tr|F8WC40|F8WC40_HUMANTranscriptionfactorE2F6OS=HomosapiensGN=E2F6PE=1SV=1;tr|F8WEZ5|F8WEZ5_HUMANTranscriptionfactorE2F6OS=HomosapiensGN=E2F6P…	sp|O75461|E2F6_HUMANTranscriptionfactorE2F6OS=HomosapiensGN=E2F6PE=1SV=1	14330000	0	0	1	0	0	0	14330000	0	0	4;1;1;1;1	4;1;1;1;1	4;1;1;1;1		5	4	4	4	0	0	0	4	0	0	0	0	0	4	0	0	0	0	0	4	0	0	16	16	16	31.844	281	281;38;50;55;63	0	24.412	0	0	0	16
sp|O75486|SUPT3_HUMANTranscriptioninitiationproteinSPT3homologOS=HomosapiensGN=SUPT3HPE=1SV=2	sp|O75486|SUPT3_HUMANTranscriptioninitiationproteinSPT3homologOS=HomosapiensGN=SUPT3HPE=1SV=2	602760	0	0	1	0	0	0	602760	0	0	1	1	1		1	1	1	1	0	0	0	1	0	0	0	0	0	1	0	0	0	0	0	1	0	0	3	3	3	44.361	399	399	0.0020704	6.4141	0	0	0	3
tr|F8WEG8|F8WEG8_HUMANInterferon-inducibledouble-strandedRNA-dependentproteinkinaseactivatorAOS=HomosapiensGN=PRKRAPE=1SV=1;tr|G5E9Q4|G5E9Q4_HUMANInterferon-inducibledouble-strandedRNA-dependentproteinkinaseactivatorAOS=HomosapiensGN=PRKRAPE=1SV=1;tr|C9JMM3|C9JMM3_HUMANInterferon-inducibledouble-strandedRNA-dependentproteinkinaseactivatorA(Fragment)OS=HomosapiensGN=PRKRAPE=1SV=5;sp|O75569|PRKRA_H…	tr|F8WEG8|F8WEG8_HUMANInterferon-inducibledouble-strandedRNA-dependentproteinkinaseactivatorAOS=HomosapiensGN=PRKRAPE=1SV=1;tr|G5E9Q4|G5E9Q4_HUMANInterferon-inducibledouble-strandedRNA-dependentproteinkinaseactivatorAOS=HomosapiensGN=PRKRAPE=1SV=1;tr|C9JMM3|C9JMM3_HUMANInterferon-inducibledouble-strandedRNA-dependentproteinkinaseactivatorA(Fragment)OS=HomosapiensGN=PRKRAPE=1SV=5;sp|O75569|PRKRA_H…	2156200	0	0	1	0	0	0	2156200	0	0	1;1;1;1	1;1;1;1	1;1;1;1	;;;	4	1	1	1	0	0	0	1	0	0	0	0	0	1	0	0	0	0	0	1	0	0	10.5	10.5	10.5	10.414	95	95;105;109;313	0.0020492	6.4011	0	0	0	10.5
tr|J3KRL0|J3KRL0_HUMANUnconventionalmyosin-IdOS=HomosapiensGN=MYO1DPE=1SV=1;tr|K7EIG7|K7EIG7_HUMANUnconventionalmyosin-IdOS=HomosapiensGN=MYO1DPE=1SV=1;tr|J3QRN6|J3QRN6_HUMANUnconventionalmyosin-IdOS=HomosapiensGN=MYO1DPE=1SV=1;sp|O94832|MYO1D_HUMANUnconventionalmyosin-IdOS=HomosapiensGN=MYO1DPE=1SV=2	tr|J3KRL0|J3KRL0_HUMANUnconventionalmyosin-IdOS=HomosapiensGN=MYO1DPE=1SV=1;tr|K7EIG7|K7EIG7_HUMANUnconventionalmyosin-IdOS=HomosapiensGN=MYO1DPE=1SV=1;tr|J3QRN6|J3QRN6_HUMANUnconventionalmyosin-IdOS=HomosapiensGN=MYO1DPE=1SV=1;sp|O94832|MYO1D_HUMANUnconventionalmyosin-IdOS=HomosapiensGN=MYO1DPE=1SV=2	0	0	0	1	0	0	0	0	0	0	1;1;1;1	1;1;1;1	1;1;1;1	;;;	4	1	1	1	0	1	1	0	0	0	0	1	1	0	0	0	0	1	1	0	0	0	2.8	2.8	2.8	49.768	436	436;918;961;1006	0	7.0916	0	2.8	2.8	0
sp|P04080|CYTB_HUMANCystatin-BOS=HomosapiensGN=CSTBPE=1SV=2	sp|P04080|CYTB_HUMANCystatin-BOS=HomosapiensGN=CSTBPE=1SV=2	3919300	0	0	1	0	0	0	3919300	0	0	1	1	1		1	1	1	1	0	0	0	1	0	0	0	0	0	1	0	0	0	0	0	1	0	0	12.2	12.2	12.2	11.139	98	98	0	7.4622	0	0	0	12.2
sp|P08238|HS90B_HUMANHeatshockproteinHSP90-betaOS=HomosapiensGN=HSP90AB1PE=1SV=4;tr|F8W026|F8W026_HUMANEndoplasmin(Fragment)OS=HomosapiensGN=HSP90B1PE=1SV=5;sp|P07900|HS90A_HUMANHeatshockproteinHSP90-alphaOS=HomosapiensGN=HSP90AA1PE=1SV=5	sp|P08238|HS90B_HUMANHeatshockproteinHSP90-betaOS=HomosapiensGN=HSP90AB1PE=1SV=4;tr|F8W026|F8W026_HUMANEndoplasmin(Fragment)OS=HomosapiensGN=HSP90B1PE=1SV=5;sp|P07900|HS90A_HUMANHeatshockproteinHSP90-alphaOS=HomosapiensGN=HSP90AA1PE=1SV=5	1163500	0	0	1	0	0	0	1163500	0	0	2;1;1	2;1;1	1;0;1	;;	3	2	2	1	0	1	1	1	0	0	0	1	1	1	0	0	0	1	0	0	0	0	3.6	3.6	1.9	83.263	724	724;49;732	0	12.952	0	1.9	1.7	1.7
tr|C9J9K3|C9J9K3_HUMAN40SribosomalproteinSA(Fragment)OS=HomosapiensGN=RPSAPE=1SV=5;tr|A6NE09|A6NE09_HUMAN40SribosomalproteinSAOS=HomosapiensGN=RPSAP58PE=1SV=1;sp|P08865|RSSA_HUMAN40SribosomalproteinSAOS=HomosapiensGN=RPSAPE=1SV=4;tr|A0A0C4DG17|A0A0C4DG17_HUMAN40SribosomalproteinSAOS=HomosapiensGN=RPSAPE=1SV=1	tr|C9J9K3|C9J9K3_HUMAN40SribosomalproteinSA(Fragment)OS=HomosapiensGN=RPSAPE=1SV=5;tr|A6NE09|A6NE09_HUMAN40SribosomalproteinSAOS=HomosapiensGN=RPSAP58PE=1SV=1;sp|P08865|RSSA_HUMAN40SribosomalproteinSAOS=HomosapiensGN=RPSAPE=1SV=4;tr|A0A0C4DG17|A0A0C4DG17_HUMAN40SribosomalproteinSAOS=HomosapiensGN=RPSAPE=1SV=1	0	0	0	1	0	0	0	0	0	0	1;1;1;1	1;1;1;1	1;1;1;1	;;;	4	1	1	1	0	0	0	0	1	0	0	0	0	0	1	0	0	0	0	0	1	0	6.4	6.4	6.4	29.505	264	264;295;295;300	0	8.1047	0	0	0	0
sp|P0CW18|PRS56_HUMANSerineprotease56OS=HomosapiensGN=PRSS56PE=1SV=1;tr|R4GMZ0|R4GMZ0_HUMANSerineprotease56OS=HomosapiensGN=PRSS56PE=1SV=1	sp|P0CW18|PRS56_HUMANSerineprotease56OS=HomosapiensGN=PRSS56PE=1SV=1;tr|R4GMZ0|R4GMZ0_HUMANSerineprotease56OS=HomosapiensGN=PRSS56PE=1SV=1	0	0	0	1	0	0	0	0	0	0	1;1	1;1	1;1	;	2	1	1	1	0	1	0	0	0	0	0	1	0	0	0	0	0	1	0	0	0	0	1.3	1.3	1.3	64.596	603	603;604	0	7.019	0	1.3	0	0
sp|P10599|THIO_HUMANThioredoxinOS=HomosapiensGN=TXNPE=1SV=3	sp|P10599|THIO_HUMANThioredoxinOS=HomosapiensGN=TXNPE=1SV=3	18041000	0	0	1	0	0	0	18041000	0	0	3	3	3		1	3	3	3	1	0	1	3	0	0	1	0	1	3	0	0	1	0	1	3	0	0	22.9	22.9	22.9	11.737	105	105	0	26.185	12.4	0	12.4	22.9
tr|E9PPC8|E9PPC8_HUMANSerine/threonine-proteinphosphatase(Fragment)OS=HomosapiensGN=PPP3CAPE=1SV=1;tr|E9PK68|E9PK68_HUMANSerine/threonine-proteinphosphatase(Fragment)OS=HomosapiensGN=PPP3CAPE=1SV=1;tr|H0YB02|H0YB02_HUMANSerine/threonine-proteinphosphatase2Bcatalyticsubunitgammaisoform(Fragment)OS=HomosapiensGN=PPP3CCPE=1SV=1;tr|G3V111|G3V111_HUMANSerine/threonine-proteinphosphataseOS=HomosapiensG…	tr|E9PPC8|E9PPC8_HUMANSerine/threonine-proteinphosphatase(Fragment)OS=HomosapiensGN=PPP3CAPE=1SV=1;tr|E9PK68|E9PK68_HUMANSerine/threonine-proteinphosphatase(Fragment)OS=HomosapiensGN=PPP3CAPE=1SV=1;tr|H0YB02|H0YB02_HUMANSerine/threonine-proteinphosphatase2Bcatalyticsubunitgammaisoform(Fragment)OS=HomosapiensGN=PPP3CCPE=1SV=1;tr|G3V111|G3V111_HUMANSerine/threonine-proteinphosphataseOS=HomosapiensG…	1640700	0	0	1	0	0	0	1640700	0	0	1;1;1;1;1;1;1;1;1	1;1;1;1;1;1;1;1;1	1;1;1;1;1;1;1;1;1	;;;;;;;;	9	1	1	1	0	0	0	1	0	0	0	0	0	1	0	0	0	0	0	1	0	0	7.6	7.6	7.6	15.365	132	132;147;153;326;423;496;512;521;524	0.0021413	6.6058	0	0	0	7.6
sp|P16989|YBOX3_HUMANY-box-bindingprotein3OS=HomosapiensGN=YBX3PE=1SV=4;tr|A0A0D9SEI8|A0A0D9SEI8_HUMANY-box-bindingprotein3(Fragment)OS=HomosapiensGN=YBX3PE=1SV=1	sp|P16989|YBOX3_HUMANY-box-bindingprotein3OS=HomosapiensGN=YBX3PE=1SV=4	5640600	0	0	1	0	0	0	5640600	0	0	5;2	2;1	2;1		2	5	2	2	0	1	0	4	1	1	0	0	0	2	1	1	0	0	0	2	1	1	22.6	13.7	13.7	40.089	372	372;92	0	38.628	0	4.3	0	22.3
sp|P17066|HSP76_HUMANHeatshock70kDaprotein6OS=HomosapiensGN=HSPA6PE=1SV=2;sp|P48741|HSP77_HUMANPutativeheatshock70kDaprotein7OS=HomosapiensGN=HSPA7PE=5SV=2	sp|P17066|HSP76_HUMANHeatshock70kDaprotein6OS=HomosapiensGN=HSPA6PE=1SV=2	2919800	0	0	1	0	0	0	2919800	0	0	7;3	1;1	1;1		2	7	1	1	2	7	5	2	0	0	1	1	1	1	0	0	1	1	1	1	0	0	12.6	1.7	1.7	71.027	643	643;367	0	14.736	3.7	12.6	10.1	3.7
tr|A0A0G2JI50|A0A0G2JI50_HUMANNegativeelongationfactorE(Fragment)OS=HomosapiensGN=NELFEPE=4SV=1;tr|E9PD43|E9PD43_HUMANNegativeelongationfactorE(Fragment)OS=HomosapiensGN=NELFEPE=1SV=1;tr|A0A0A0MT02|A0A0A0MT02_HUMANNegativeelongationfactorE(Fragment)OS=HomosapiensGN=NELFEPE=1SV=3;tr|A0A0A0MSN9|A0A0A0MSN9_HUMANNegativeelongationfactorE(Fragment)OS=HomosapiensGN=NELFEPE=1SV=3;sp|P18615|NELFE_HUMANNe…	tr|A0A0G2JI50|A0A0G2JI50_HUMANNegativeelongationfactorE(Fragment)OS=HomosapiensGN=NELFEPE=4SV=1;tr|E9PD43|E9PD43_HUMANNegativeelongationfactorE(Fragment)OS=HomosapiensGN=NELFEPE=1SV=1;tr|A0A0A0MT02|A0A0A0MT02_HUMANNegativeelongationfactorE(Fragment)OS=HomosapiensGN=NELFEPE=1SV=3;tr|A0A0A0MSN9|A0A0A0MSN9_HUMANNegativeelongationfactorE(Fragment)OS=HomosapiensGN=NELFEPE=1SV=3;sp|P18615|NELFE_HUMANNe…	1317300	0	0	1	0	0	0	1317300	0	0	1;1;1;1;1	1;1;1;1;1	1;1;1;1;1	;;;;	5	1	1	1	0	0	0	1	0	0	0	0	0	1	0	0	0	0	0	1	0	0	3.8	3.8	3.8	27.628	240	240;260;294;334;380	0.0075472	6.0425	0	0	0	3.8
sp|P19387|RPB3_HUMANDNA-directedRNApolymeraseIIsubunitRPB3OS=HomosapiensGN=POLR2CPE=1SV=2;tr|H3BRR2|H3BRR2_HUMANDNA-directedRNApolymeraseIIsubunitRPB3OS=HomosapiensGN=POLR2CPE=1SV=1	sp|P19387|RPB3_HUMANDNA-directedRNApolymeraseIIsubunitRPB3OS=HomosapiensGN=POLR2CPE=1SV=2	0	9105100	0	1	0	0	0	0	9105100	0	4;1	4;1	4;1		2	4	4	4	0	0	0	2	3	1	0	0	0	2	3	1	0	0	0	2	3	1	23.3	23.3	23.3	31.441	275	275;46	0	32.444	0	0	0	11.3
sp|P19474|RO52_HUMANE3ubiquitin-proteinligaseTRIM21OS=HomosapiensGN=TRIM21PE=1SV=1	sp|P19474|RO52_HUMANE3ubiquitin-proteinligaseTRIM21OS=HomosapiensGN=TRIM21PE=1SV=1	4053400	0	0	1	0	0	0	4053400	0	0	3	3	3		1	3	3	3	0	0	0	3	0	0	0	0	0	3	0	0	0	0	0	3	0	0	5.9	5.9	5.9	54.169	475	475	0	18.272	0	0	0	5.9
tr|Q7Z6P5|Q7Z6P5_HUMANDNAreplicationlicensingfactorMCM3(Fragment)OS=HomosapiensGN=MCM3PE=1SV=1;sp|P25205|MCM3_HUMANDNAreplicationlicensingfactorMCM3OS=HomosapiensGN=MCM3PE=1SV=3;tr|J3KQ69|J3KQ69_HUMANDNAreplicationlicensingfactorMCM3OS=HomosapiensGN=MCM3PE=1SV=2	tr|Q7Z6P5|Q7Z6P5_HUMANDNAreplicationlicensingfactorMCM3(Fragment)OS=HomosapiensGN=MCM3PE=1SV=1;sp|P25205|MCM3_HUMANDNAreplicationlicensingfactorMCM3OS=HomosapiensGN=MCM3PE=1SV=3;tr|J3KQ69|J3KQ69_HUMANDNAreplicationlicensingfactorMCM3OS=HomosapiensGN=MCM3PE=1SV=2	1457700	0	0	1	0	0	0	1457700	0	0	1;1;1	1;1;1	1;1;1	;;	3	1	1	1	0	0	0	1	0	0	0	0	0	1	0	0	0	0	0	1	0	0	6.1	6.1	6.1	37.407	328	328;808;818	0	7.2251	0	0	0	6.1
tr|E9PMW7|E9PMW7_HUMANElongationfactor1-deltaOS=HomosapiensGN=EEF1DPE=1SV=1;tr|E9PIZ1|E9PIZ1_HUMANElongationfactor1-delta(Fragment)OS=HomosapiensGN=EEF1DPE=1SV=1;tr|E9PPR1|E9PPR1_HUMANElongationfactor1-delta(Fragment)OS=HomosapiensGN=EEF1DPE=1SV=1;tr|E9PL12|E9PL12_HUMANElongationfactor1-delta(Fragment)OS=HomosapiensGN=EEF1DPE=1SV=1;tr|E9PQ49|E9PQ49_HUMANElongationfactor1-delta(Fragment)OS=Homosap…	tr|E9PMW7|E9PMW7_HUMANElongationfactor1-deltaOS=HomosapiensGN=EEF1DPE=1SV=1;tr|E9PIZ1|E9PIZ1_HUMANElongationfactor1-delta(Fragment)OS=HomosapiensGN=EEF1DPE=1SV=1;tr|E9PPR1|E9PPR1_HUMANElongationfactor1-delta(Fragment)OS=HomosapiensGN=EEF1DPE=1SV=1;tr|E9PL12|E9PL12_HUMANElongationfactor1-delta(Fragment)OS=HomosapiensGN=EEF1DPE=1SV=1;tr|E9PQ49|E9PQ49_HUMANElongationfactor1-delta(Fragment)OS=Homosap…	3717800	0	0	1	0	0	0	3717800	0	0	1;1;1;1;1;1;1;1;1;1;1	1;1;1;1;1;1;1;1;1;1;1	1;1;1;1;1;1;1;1;1;1;1	;;;;;;;;;;	11	1	1	1	0	0	0	1	0	0	0	0	0	1	0	0	0	0	0	1	0	0	18.5	18.5	18.5	14.18	130	130;137;166;168;199;204;210;261;281;631;697	0	22.606	0	0	0	18.5
sp|P35249|RFC4_HUMANReplicationfactorCsubunit4OS=HomosapiensGN=RFC4PE=1SV=2;tr|H7C1P0|H7C1P0_HUMANReplicationfactorCsubunit4(Fragment)OS=HomosapiensGN=RFC4PE=1SV=1;tr|C9JTT7|C9JTT7_HUMANReplicationfactorCsubunit4(Fragment)OS=HomosapiensGN=RFC4PE=1SV=1;tr|C9J8M3|C9J8M3_HUMANReplicationfactorCsubunit4(Fragment)OS=HomosapiensGN=RFC4PE=1SV=1;tr|C9JZI1|C9JZI1_HUMANReplicationfactorCsubunit4OS=Homosapi…	sp|P35249|RFC4_HUMANReplicationfactorCsubunit4OS=HomosapiensGN=RFC4PE=1SV=2;tr|H7C1P0|H7C1P0_HUMANReplicationfactorCsubunit4(Fragment)OS=HomosapiensGN=RFC4PE=1SV=1;tr|C9JTT7|C9JTT7_HUMANReplicationfactorCsubunit4(Fragment)OS=HomosapiensGN=RFC4PE=1SV=1;tr|C9J8M3|C9J8M3_HUMANReplicationfactorCsubunit4(Fragment)OS=HomosapiensGN=RFC4PE=1SV=1;tr|C9JZI1|C9JZI1_HUMANReplicationfactorCsubunit4OS=Homosapi…	1291000	0	0	1	0	0	0	1291000	0	0	2;1;1;1;1	2;1;1;1;1	2;1;1;1;1	;;;;	5	2	2	2	0	0	0	1	1	0	0	0	0	1	1	0	0	0	0	1	1	0	6.6	6.6	6.6	39.681	363	363;111;167;214;336	0	12.483	0	0	0	3
tr|H7C5S7|H7C5S7_HUMANReplicationfactorCsubunit2(Fragment)OS=HomosapiensGN=RFC2PE=1SV=1;tr|H7C5P1|H7C5P1_HUMANReplicationfactorCsubunit2(Fragment)OS=HomosapiensGN=RFC2PE=1SV=1;tr|H7C5Q7|H7C5Q7_HUMANReplicationfactorCsubunit2(Fragment)OS=HomosapiensGN=RFC2PE=1SV=1;tr|F8WC37|F8WC37_HUMANReplicationfactorCsubunit2OS=HomosapiensGN=RFC2PE=1SV=1;tr|H7C5A0|H7C5A0_HUMANReplicationfactorCsubunit2(Fragment…	tr|H7C5S7|H7C5S7_HUMANReplicationfactorCsubunit2(Fragment)OS=HomosapiensGN=RFC2PE=1SV=1;tr|H7C5P1|H7C5P1_HUMANReplicationfactorCsubunit2(Fragment)OS=HomosapiensGN=RFC2PE=1SV=1;tr|H7C5Q7|H7C5Q7_HUMANReplicationfactorCsubunit2(Fragment)OS=HomosapiensGN=RFC2PE=1SV=1;tr|F8WC37|F8WC37_HUMANReplicationfactorCsubunit2OS=HomosapiensGN=RFC2PE=1SV=1;tr|H7C5A0|H7C5A0_HUMANReplicationfactorCsubunit2(Fragment…	1056500	0	0	1	0	0	0	1056500	0	0	1;1;1;1;1;1;1	1;1;1;1;1;1;1	1;1;1;1;1;1;1	;;;;;;	7	1	1	1	0	0	0	1	0	0	0	0	0	1	0	0	0	0	0	1	0	0	46.4	46.4	46.4	3.2816	28	28;52;75;77;87;101;354	0.0020576	6.4035	0	0	0	46.4
tr|F8VYE8|F8VYE8_HUMANSerine/threonine-proteinphosphataseOS=HomosapiensGN=PPP1CCPE=1SV=1;sp|P36873|PP1G_HUMANSerine/threonine-proteinphosphatasePP1-gammacatalyticsubunitOS=HomosapiensGN=PPP1CCPE=1SV=1;tr|A0A087WYY5|A0A087WYY5_HUMANSerine/threonine-proteinphosphataseOS=HomosapiensGN=PPP1CCPE=1SV=1;tr|F8VR82|F8VR82_HUMANSerine/threonine-proteinphosphataseOS=HomosapiensGN=PPP1CCPE=1SV=1;tr|F8W0W8|F8…	tr|F8VYE8|F8VYE8_HUMANSerine/threonine-proteinphosphataseOS=HomosapiensGN=PPP1CCPE=1SV=1;sp|P36873|PP1G_HUMANSerine/threonine-proteinphosphatasePP1-gammacatalyticsubunitOS=HomosapiensGN=PPP1CCPE=1SV=1;tr|A0A087WYY5|A0A087WYY5_HUMANSerine/threonine-proteinphosphataseOS=HomosapiensGN=PPP1CCPE=1SV=1;tr|F8VR82|F8VR82_HUMANSerine/threonine-proteinphosphataseOS=HomosapiensGN=PPP1CCPE=1SV=1;tr|F8W0W8|F8…	14613000	0	0	1	0	0	0	14613000	0	0	6;6;5;5;5;1	2;2;2;2;1;0	2;2;2;2;1;0	;;;;	6	6	2	2	2	0	0	6	3	2	0	0	0	2	1	0	0	0	0	2	1	0	21.7	7.9	7.9	34.95	304	304;323;140;270;332;64	0	66.432	8.2	0	0	21.7
tr|C9JH72|C9JH72_HUMANReplicationfactorCsubunit5(Fragment)OS=HomosapiensGN=RFC5PE=1SV=1;sp|P40937|RFC5_HUMANReplicationfactorCsubunit5OS=HomosapiensGN=RFC5PE=1SV=1;tr|F5H304|F5H304_HUMANReplicationfactorCsubunit5(Fragment)OS=HomosapiensGN=RFC5PE=1SV=1;tr|E9PEP3|E9PEP3_HUMANReplicationfactorCsubunit5(Fragment)OS=HomosapiensGN=RFC5PE=1SV=1;tr|F5H5S0|F5H5S0_HUMANReplicationfactorCsubunit5(Fragment)O…	tr|C9JH72|C9JH72_HUMANReplicationfactorCsubunit5(Fragment)OS=HomosapiensGN=RFC5PE=1SV=1;sp|P40937|RFC5_HUMANReplicationfactorCsubunit5OS=HomosapiensGN=RFC5PE=1SV=1;tr|F5H304|F5H304_HUMANReplicationfactorCsubunit5(Fragment)OS=HomosapiensGN=RFC5PE=1SV=1;tr|E9PEP3|E9PEP3_HUMANReplicationfactorCsubunit5(Fragment)OS=HomosapiensGN=RFC5PE=1SV=1;tr|F5H5S0|F5H5S0_HUMANReplicationfactorCsubunit5(Fragment)O…	2588600	0	0	1	0	0	0	2588600	0	0	2;2;1;1;1;1	2;2;1;1;1;1	2;2;1;1;1;1	;;;;;	6	2	2	2	0	0	0	2	0	0	0	0	0	2	0	0	0	0	0	2	0	0	23.1	23.1	23.1	11.723	104	104;340;63;99;104;139	0	13.242	0	0	0	23.1
sp|P40938|RFC3_HUMANReplicationfactorCsubunit3OS=HomosapiensGN=RFC3PE=1SV=2;tr|A0A087X270|A0A087X270_HUMANReplicationfactorCsubunit3(Fragment)OS=HomosapiensGN=RFC3PE=1SV=1	sp|P40938|RFC3_HUMANReplicationfactorCsubunit3OS=HomosapiensGN=RFC3PE=1SV=2	6039000	0	0	1	0	0	0	6039000	0	0	4;1	4;1	4;1		2	4	4	4	0	0	0	4	0	0	0	0	0	4	0	0	0	0	0	4	0	0	12.1	12.1	12.1	40.556	356	356;103	0	24.623	0	0	0	12.1
sp|P46087|NOP2_HUMANProbable28SrRNA(cytosine(4447)-C(5))-methyltransferaseOS=HomosapiensGN=NOP2PE=1SV=2;tr|A0A087WV73|A0A087WV73_HUMANProbable28SrRNA(cytosine(4447)-C(5))-methyltransferaseOS=HomosapiensGN=NOP2PE=1SV=1	sp|P46087|NOP2_HUMANProbable28SrRNA(cytosine(4447)-C(5))-methyltransferaseOS=HomosapiensGN=NOP2PE=1SV=2;tr|A0A087WV73|A0A087WV73_HUMANProbable28SrRNA(cytosine(4447)-C(5))-methyltransferaseOS=HomosapiensGN=NOP2PE=1SV=1	0	2403800	0	1	0	0	0	0	2403800	0	2;2	2;2	2;2	;	2	2	2	2	0	0	0	0	2	1	0	0	0	0	2	1	0	0	0	0	2	1	3.7	3.7	3.7	89.301	812	812;855	0	12.496	0	0	0	0
sp|P46109|CRKL_HUMANCrk-likeproteinOS=HomosapiensGN=CRKLPE=1SV=1	sp|P46109|CRKL_HUMANCrk-likeproteinOS=HomosapiensGN=CRKLPE=1SV=1	2953400	0	0	1	0	0	0	2953400	0	0	2	2	2		1	2	2	2	0	0	0	2	0	1	0	0	0	2	0	1	0	0	0	2	0	1	7.9	7.9	7.9	33.777	303	303	0	14.635	0	0	0	7.9
sp|P46736|BRCC3_HUMANLys-63-specificdeubiquitinaseBRCC36OS=HomosapiensGN=BRCC3PE=1SV=2;tr|X6RJS7|X6RJS7_HUMANLys-63-specificdeubiquitinaseBRCC36(Fragment)OS=HomosapiensGN=BRCC3PE=1SV=1;tr|A0A0A0MS96|A0A0A0MS96_HUMANLys-63-specificdeubiquitinaseBRCC36(Fragment)OS=HomosapiensGN=BRCC3PE=1SV=1;tr|A0A087WZR3|A0A087WZR3_HUMANLys-63-specificdeubiquitinaseBRCC36OS=HomosapiensGN=BRCC3PE=1SV=1;tr|H9KVA9|H9…	sp|P46736|BRCC3_HUMANLys-63-specificdeubiquitinaseBRCC36OS=HomosapiensGN=BRCC3PE=1SV=2;tr|X6RJS7|X6RJS7_HUMANLys-63-specificdeubiquitinaseBRCC36(Fragment)OS=HomosapiensGN=BRCC3PE=1SV=1;tr|A0A0A0MS96|A0A0A0MS96_HUMANLys-63-specificdeubiquitinaseBRCC36(Fragment)OS=HomosapiensGN=BRCC3PE=1SV=1;tr|A0A087WZR3|A0A087WZR3_HUMANLys-63-specificdeubiquitinaseBRCC36OS=HomosapiensGN=BRCC3PE=1SV=1;tr|H9KVA9|H9…	6859600	0	0	1	0	0	0	6859600	0	0	4;3;2;2;2;2	4;3;2;2;2;2	4;3;2;2;2;2	;;;;;	6	4	4	4	1	0	0	3	0	0	1	0	0	3	0	0	1	0	0	3	0	0	14.6	14.6	14.6	36.072	316	316;226;90;293;317;317	0	29.095	3.8	0	0	10.8
sp|P46778|RL21_HUMAN60SribosomalproteinL21OS=HomosapiensGN=RPL21PE=1SV=2;tr|G3V1B3|G3V1B3_HUMAN60SribosomalproteinL21OS=HomosapiensGN=RPL21PE=1SV=1;tr|M0R181|M0R181_HUMAN60SribosomalproteinL21(Fragment)OS=HomosapiensGN=RPL21PE=1SV=1	sp|P46778|RL21_HUMAN60SribosomalproteinL21OS=HomosapiensGN=RPL21PE=1SV=2;tr|G3V1B3|G3V1B3_HUMAN60SribosomalproteinL21OS=HomosapiensGN=RPL21PE=1SV=1;tr|M0R181|M0R181_HUMAN60SribosomalproteinL21(Fragment)OS=HomosapiensGN=RPL21PE=1SV=1	0	16664000	0	1	0	0	0	0	16664000	0	2;1;1	2;1;1	2;1;1	;;	3	2	2	2	0	0	0	1	2	1	0	0	0	1	2	1	0	0	0	1	2	1	20.6	20.6	20.6	18.565	160	160;87;122	0	21.595	0	0	0	9.4
tr|H0YMF4|H0YMF4_HUMAN60SribosomalproteinL28OS=HomosapiensGN=RPL28PE=1SV=1;sp|P46779|RL28_HUMAN60SribosomalproteinL28OS=HomosapiensGN=RPL28PE=1SV=3;tr|H0YKD8|H0YKD8_HUMAN60SribosomalproteinL28OS=HomosapiensGN=RPL28PE=1SV=1;tr|H0YLP6|H0YLP6_HUMAN60SribosomalproteinL28OS=HomosapiensGN=RPL28PE=1SV=1	tr|H0YMF4|H0YMF4_HUMAN60SribosomalproteinL28OS=HomosapiensGN=RPL28PE=1SV=1;sp|P46779|RL28_HUMAN60SribosomalproteinL28OS=HomosapiensGN=RPL28PE=1SV=3;tr|H0YKD8|H0YKD8_HUMAN60SribosomalproteinL28OS=HomosapiensGN=RPL28PE=1SV=1;tr|H0YLP6|H0YLP6_HUMAN60SribosomalproteinL28OS=HomosapiensGN=RPL28PE=1SV=1	1025000	0	0	1	0	0	0	1025000	0	0	3;3;3;2	3;3;3;2	3;3;3;2	;;;	4	3	3	3	0	0	0	1	2	2	0	0	0	1	2	2	0	0	0	1	2	2	25	25	25	12.39	112	112;137;170;89	0	18.491	0	0	0	9.8
sp|P46781|RS9_HUMAN40SribosomalproteinS9OS=HomosapiensGN=RPS9PE=1SV=3;tr|B5MCT8|B5MCT8_HUMAN40SribosomalproteinS9OS=HomosapiensGN=RPS9PE=1SV=1;tr|C9JM19|C9JM19_HUMAN40SribosomalproteinS9OS=HomosapiensGN=RPS9PE=1SV=1	sp|P46781|RS9_HUMAN40SribosomalproteinS9OS=HomosapiensGN=RPS9PE=1SV=3;tr|B5MCT8|B5MCT8_HUMAN40SribosomalproteinS9OS=HomosapiensGN=RPS9PE=1SV=1;tr|C9JM19|C9JM19_HUMAN40SribosomalproteinS9OS=HomosapiensGN=RPS9PE=1SV=1	15890000	12530000	0	1	0	0	0	15890000	12530000	0	5;4;4	5;4;4	5;4;4	;;	3	5	5	5	0	0	0	5	2	0	0	0	0	5	2	0	0	0	0	5	2	0	21.6	21.6	21.6	22.591	194	194;139;156	0	31.141	0	0	0	21.6
sp|P47755|CAZA2_HUMANF-actin-cappingproteinsubunitalpha-2OS=HomosapiensGN=CAPZA2PE=1SV=3;tr|C9JUG7|C9JUG7_HUMANF-actin-cappingproteinsubunitalpha-2OS=HomosapiensGN=CAPZA2PE=1SV=1;tr|F8W9N7|F8W9N7_HUMANF-actin-cappingproteinsubunitalpha-2OS=HomosapiensGN=CAPZA2PE=1SV=1;tr|A0A0D9SET8|A0A0D9SET8_HUMANF-actin-cappingproteinsubunitalpha-2OS=HomosapiensGN=CAPZA2PE=1SV=1;tr|F8WED3|F8WED3_HUMANF-actin-ca…	sp|P47755|CAZA2_HUMANF-actin-cappingproteinsubunitalpha-2OS=HomosapiensGN=CAPZA2PE=1SV=3;tr|C9JUG7|C9JUG7_HUMANF-actin-cappingproteinsubunitalpha-2OS=HomosapiensGN=CAPZA2PE=1SV=1;tr|F8W9N7|F8W9N7_HUMANF-actin-cappingproteinsubunitalpha-2OS=HomosapiensGN=CAPZA2PE=1SV=1;tr|A0A0D9SET8|A0A0D9SET8_HUMANF-actin-cappingproteinsubunitalpha-2OS=HomosapiensGN=CAPZA2PE=1SV=1	56766000	0	0	1	0	0	0	56766000	0	0	9;6;6;5;1	7;5;5;4;1	7;5;5;4;1	;;;	5	9	7	7	0	1	1	9	1	1	0	0	0	7	0	0	0	0	0	7	0	0	47.2	37.8	37.8	32.949	286	286;146;174;174;37	0	224.37	0	3.5	3.5	47.2
sp|P49207|RL34_HUMAN60SribosomalproteinL34OS=HomosapiensGN=RPL34PE=1SV=3	sp|P49207|RL34_HUMAN60SribosomalproteinL34OS=HomosapiensGN=RPL34PE=1SV=3	3244300	0	0	1	0	0	0	3244300	0	0	1	1	1		1	1	1	1	0	0	0	1	0	0	0	0	0	1	0	0	0	0	0	1	0	0	6.8	6.8	6.8	13.293	117	117	0	10.65	0	0	0	6.8
tr|E7EQB8|E7EQB8_HUMANIsocitratedehydrogenase[NAD]subunit,mitochondrialOS=HomosapiensGN=IDH3GPE=1SV=1;sp|P51553|IDH3G_HUMANIsocitratedehydrogenase[NAD]subunitgamma,mitochondrialOS=HomosapiensGN=IDH3GPE=1SV=1	tr|E7EQB8|E7EQB8_HUMANIsocitratedehydrogenase[NAD]subunit,mitochondrialOS=HomosapiensGN=IDH3GPE=1SV=1;sp|P51553|IDH3G_HUMANIsocitratedehydrogenase[NAD]subunitgamma,mitochondrialOS=HomosapiensGN=IDH3GPE=1SV=1	82614000	0	0	1	0	0	0	82614000	0	0	1;1	1;1	1;1	;	2	1	1	1	1	1	1	1	0	0	1	1	1	1	0	0	1	1	1	1	0	0	2.9	2.9	2.9	37.066	340	340;393	0.003937	6.235	2.9	2.9	2.9	2.9
sp|P54259|ATN1_HUMANAtrophin-1OS=HomosapiensGN=ATN1PE=1SV=3	sp|P54259|ATN1_HUMANAtrophin-1OS=HomosapiensGN=ATN1PE=1SV=3	0	0	0	1	0	0	0	0	0	0	1	1	1		1	1	1	1	0	0	0	1	0	0	0	0	0	1	0	0	0	0	0	1	0	0	0.8	0.8	0.8	125.41	1190	1190	0.0057915	6.1176	0	0	0	0.8
tr|H0YHF8|H0YHF8_HUMAN5'-AMP-activatedproteinkinasesubunitgamma-1(Fragment)OS=HomosapiensGN=PRKAG1PE=1SV=1;tr|H0YIC9|H0YIC9_HUMAN5'-AMP-activatedproteinkinasesubunitgamma-1(Fragment)OS=HomosapiensGN=PRKAG1PE=1SV=1;tr|F8VYY9|F8VYY9_HUMAN5'-AMP-activatedproteinkinasesubunitgamma-1OS=HomosapiensGN=PRKAG1PE=1SV=1;sp|P54619|AAKG1_HUMAN5'-AMP-activatedproteinkinasesubunitgamma-1OS=HomosapiensGN=PRKAG1P…	tr|H0YHF8|H0YHF8_HUMAN5'-AMP-activatedproteinkinasesubunitgamma-1(Fragment)OS=HomosapiensGN=PRKAG1PE=1SV=1;tr|H0YIC9|H0YIC9_HUMAN5'-AMP-activatedproteinkinasesubunitgamma-1(Fragment)OS=HomosapiensGN=PRKAG1PE=1SV=1;tr|F8VYY9|F8VYY9_HUMAN5'-AMP-activatedproteinkinasesubunitgamma-1OS=HomosapiensGN=PRKAG1PE=1SV=1;sp|P54619|AAKG1_HUMAN5'-AMP-activatedproteinkinasesubunitgamma-1OS=HomosapiensGN=PRKAG1P…	1689200	0	0	1	0	0	0	1689200	0	0	1;1;1;1	1;1;1;1	1;1;1;1	;;;	4	1	1	1	0	0	0	1	0	0	0	0	0	1	0	0	0	0	0	1	0	0	11.8	11.8	11.8	10.713	93	93;251;280;331	0.0056818	6.0456	0	0	0	11.8
sp|P55735|SEC13_HUMANProteinSEC13homologOS=HomosapiensGN=SEC13PE=1SV=3;tr|E7ERC8|E7ERC8_HUMANProteinSEC13homolog(Fragment)OS=HomosapiensGN=SEC13PE=1SV=1;tr|A8MXL6|A8MXL6_HUMANProteinSEC13homologOS=HomosapiensGN=SEC13PE=1SV=1;tr|A0A0C4DFR6|A0A0C4DFR6_HUMANProteinSEC13homologOS=HomosapiensGN=SEC13PE=1SV=1	sp|P55735|SEC13_HUMANProteinSEC13homologOS=HomosapiensGN=SEC13PE=1SV=3;tr|E7ERC8|E7ERC8_HUMANProteinSEC13homolog(Fragment)OS=HomosapiensGN=SEC13PE=1SV=1;tr|A8MXL6|A8MXL6_HUMANProteinSEC13homologOS=HomosapiensGN=SEC13PE=1SV=1;tr|A0A0C4DFR6|A0A0C4DFR6_HUMANProteinSEC13homologOS=HomosapiensGN=SEC13PE=1SV=1	7599000	0	0	1	0	0	0	7599000	0	0	2;1;1;1	2;1;1;1	2;1;1;1	;;;	4	2	2	2	0	0	0	2	0	0	0	0	0	2	0	0	0	0	0	2	0	0	11.5	11.5	11.5	35.54	322	322;86;284;325	0	18.597	0	0	0	11.5
sp|P61247|RS3A_HUMAN40SribosomalproteinS3aOS=HomosapiensGN=RPS3APE=1SV=2;tr|H0Y9Y4|H0Y9Y4_HUMAN40SribosomalproteinS3a(Fragment)OS=HomosapiensGN=RPS3APE=1SV=1;tr|D6RAT0|D6RAT0_HUMAN40SribosomalproteinS3aOS=HomosapiensGN=RPS3APE=1SV=1;tr|D6R9B6|D6R9B6_HUMAN40SribosomalproteinS3aOS=HomosapiensGN=RPS3APE=1SV=1;tr|H0Y8L7|H0Y8L7_HUMAN40SribosomalproteinS3a(Fragment)OS=HomosapiensGN=RPS3APE=1SV=1;tr|D6R…	sp|P61247|RS3A_HUMAN40SribosomalproteinS3aOS=HomosapiensGN=RPS3APE=1SV=2;tr|H0Y9Y4|H0Y9Y4_HUMAN40SribosomalproteinS3a(Fragment)OS=HomosapiensGN=RPS3APE=1SV=1;tr|D6RAT0|D6RAT0_HUMAN40SribosomalproteinS3aOS=HomosapiensGN=RPS3APE=1SV=1;tr|D6R9B6|D6R9B6_HUMAN40SribosomalproteinS3aOS=HomosapiensGN=RPS3APE=1SV=1;tr|H0Y8L7|H0Y8L7_HUMAN40SribosomalproteinS3a(Fragment)OS=HomosapiensGN=RPS3APE=1SV=1;tr|D6R…	0	25516000	0	1	0	0	0	0	25516000	0	5;4;4;3;3;3;3;3;2;2;1;1	5;4;4;3;3;3;3;3;2;2;1;1	5;4;4;3;3;3;3;3;2;2;1;1	;;;;;;;	12	5	5	5	0	0	0	0	5	1	0	0	0	0	5	1	0	0	0	0	5	1	18.2	18.2	18.2	29.945	264	264;208;227;145;190;194;205;223;101;125;65;95	0	28.305	0	0	0	0
sp|P61964|WDR5_HUMANWDrepeat-containingprotein5OS=HomosapiensGN=WDR5PE=1SV=1;tr|V9GZ59|V9GZ59_HUMANWDrepeat-containingprotein5(Fragment)OS=HomosapiensGN=WDR5PE=1SV=5	sp|P61964|WDR5_HUMANWDrepeat-containingprotein5OS=HomosapiensGN=WDR5PE=1SV=1	12490000	13853000	0	1	0	0	0	12490000	13853000	0	4;1	4;1	4;1		2	4	4	4	0	1	1	3	3	1	0	1	1	3	3	1	0	1	1	3	3	1	17.1	17.1	17.1	36.588	334	334;97	0	46.776	0	4.2	4.2	12.6
sp|P62140|PP1B_HUMANSerine/threonine-proteinphosphatasePP1-betacatalyticsubunitOS=HomosapiensGN=PPP1CBPE=1SV=3;tr|C9J9S3|C9J9S3_HUMANSerine/threonine-proteinphosphatase(Fragment)OS=HomosapiensGN=PPP1CBPE=1SV=1;tr|C9JP48|C9JP48_HUMANSerine/threonine-proteinphosphatase(Fragment)OS=HomosapiensGN=PPP1CBPE=1SV=1;tr|E7ETD8|E7ETD8_HUMANSerine/threonine-proteinphosphatase(Fragment)OS=HomosapiensGN=PPP1CB…	sp|P62140|PP1B_HUMANSerine/threonine-proteinphosphatasePP1-betacatalyticsubunitOS=HomosapiensGN=PPP1CBPE=1SV=3;tr|C9J9S3|C9J9S3_HUMANSerine/threonine-proteinphosphatase(Fragment)OS=HomosapiensGN=PPP1CBPE=1SV=1;tr|C9JP48|C9JP48_HUMANSerine/threonine-proteinphosphatase(Fragment)OS=HomosapiensGN=PPP1CBPE=1SV=1;tr|E7ETD8|E7ETD8_HUMANSerine/threonine-proteinphosphatase(Fragment)OS=HomosapiensGN=PPP1CB…	16849000	0	0	1	0	0	0	16849000	0	0	7;6;6;4	3;3;3;1	3;3;3;1	;;;	4	7	3	3	2	0	0	7	3	3	0	0	0	3	1	1	0	0	0	3	1	1	26.6	13.8	13.8	37.186	327	327;125;138;169	0	77.1	7.6	0	0	26.6
tr|Q5JR95|Q5JR95_HUMAN40SribosomalproteinS8OS=HomosapiensGN=RPS8PE=1SV=1;sp|P62241|RS8_HUMAN40SribosomalproteinS8OS=HomosapiensGN=RPS8PE=1SV=2	tr|Q5JR95|Q5JR95_HUMAN40SribosomalproteinS8OS=HomosapiensGN=RPS8PE=1SV=1;sp|P62241|RS8_HUMAN40SribosomalproteinS8OS=HomosapiensGN=RPS8PE=1SV=2	0	44316000	0	1	0	0	0	0	44316000	0	5;5	5;5	5;5	;	2	5	5	5	1	0	0	1	5	3	1	0	0	1	5	3	1	0	0	1	5	3	32.4	32.4	32.4	21.879	188	188;208	0	117.1	6.9	0	0	6.9
tr|M0QX76|M0QX76_HUMAN40SribosomalproteinS16(Fragment)OS=HomosapiensGN=RPS16PE=1SV=1;tr|M0R1M5|M0R1M5_HUMAN40SribosomalproteinS16(Fragment)OS=HomosapiensGN=RPS16PE=1SV=1;tr|M0R3H0|M0R3H0_HUMAN40SribosomalproteinS16OS=HomosapiensGN=RPS16PE=1SV=1;tr|M0R210|M0R210_HUMAN40SribosomalproteinS16OS=HomosapiensGN=RPS16PE=1SV=1;tr|A0A087WZ27|A0A087WZ27_HUMANZincfingerprotein90OS=HomosapiensGN=ZNF90PE=4SV=2…	tr|M0QX76|M0QX76_HUMAN40SribosomalproteinS16(Fragment)OS=HomosapiensGN=RPS16PE=1SV=1;tr|M0R1M5|M0R1M5_HUMAN40SribosomalproteinS16(Fragment)OS=HomosapiensGN=RPS16PE=1SV=1;tr|M0R3H0|M0R3H0_HUMAN40SribosomalproteinS16OS=HomosapiensGN=RPS16PE=1SV=1;tr|M0R210|M0R210_HUMAN40SribosomalproteinS16OS=HomosapiensGN=RPS16PE=1SV=1;tr|A0A087WZ27|A0A087WZ27_HUMANZincfingerprotein90OS=HomosapiensGN=ZNF90PE=4SV=2…	0	2222200	0	1	0	0	0	0	2222200	0	1;1;1;1;1;1;1	1;1;1;1;1;1;1	1;1;1;1;1;1;1	;;;;;;	7	1	1	1	0	1	0	1	1	0	0	1	0	1	1	0	0	1	0	1	1	0	20	20	20	5.5575	50	50;85;100;129;129;146;152	0	7.7814	0	20	0	20
sp|P62266|RS23_HUMAN40SribosomalproteinS23OS=HomosapiensGN=RPS23PE=1SV=3;tr|D6RD47|D6RD47_HUMAN40SribosomalproteinS23OS=HomosapiensGN=RPS23PE=1SV=1;tr|D6RDJ2|D6RDJ2_HUMAN40SribosomalproteinS23OS=HomosapiensGN=RPS23PE=1SV=1;tr|D6RIX0|D6RIX0_HUMAN40SribosomalproteinS23OS=HomosapiensGN=RPS23PE=1SV=1;tr|D6R9I7|D6R9I7_HUMAN40SribosomalproteinS23OS=HomosapiensGN=RPS23PE=1SV=1	sp|P62266|RS23_HUMAN40SribosomalproteinS23OS=HomosapiensGN=RPS23PE=1SV=3;tr|D6RD47|D6RD47_HUMAN40SribosomalproteinS23OS=HomosapiensGN=RPS23PE=1SV=1	14721000	0	0	1	0	0	0	14721000	0	0	4;3;1;1;1	4;3;1;1;1	4;3;1;1;1	;	5	4	4	4	0	0	0	4	0	0	0	0	0	4	0	0	0	0	0	4	0	0	21.7	21.7	21.7	15.807	143	143;134;55;85;123	0	26.393	0	0	0	21.7
tr|H0YBN9|H0YBN9_HUMANSerine/threonine-proteinphosphatase2Acatalyticsubunitbetaisoform(Fragment)OS=HomosapiensGN=PPP2CBPE=4SV=1;sp|P67775|PP2AA_HUMANSerine/threonine-proteinphosphatase2AcatalyticsubunitalphaisoformOS=HomosapiensGN=PPP2CAPE=1SV=1;sp|P62714|PP2AB_HUMANSerine/threonine-proteinphosphatase2AcatalyticsubunitbetaisoformOS=HomosapiensGN=PPP2CBPE=1SV=1	tr|H0YBN9|H0YBN9_HUMANSerine/threonine-proteinphosphatase2Acatalyticsubunitbetaisoform(Fragment)OS=HomosapiensGN=PPP2CBPE=4SV=1;sp|P67775|PP2AA_HUMANSerine/threonine-proteinphosphatase2AcatalyticsubunitalphaisoformOS=HomosapiensGN=PPP2CAPE=1SV=1;sp|P62714|PP2AB_HUMANSerine/threonine-proteinphosphatase2AcatalyticsubunitbetaisoformOS=HomosapiensGN=PPP2CBPE=1SV=1	2029800	0	0	1	0	0	0	2029800	0	0	1;1;1	1;1;1	1;1;1	;;	3	1	1	1	0	0	0	1	0	0	0	0	0	1	0	0	0	0	0	1	0	0	21.2	21.2	21.2	5.9857	52	52;309;309	0	9.0235	0	0	0	21.2
sp|P62851|RS25_HUMAN40SribosomalproteinS25OS=HomosapiensGN=RPS25PE=1SV=1	sp|P62851|RS25_HUMAN40SribosomalproteinS25OS=HomosapiensGN=RPS25PE=1SV=1	2985800	0	0	1	0	0	0	2985800	0	0	2	2	2		1	2	2	2	0	0	0	2	1	0	0	0	0	2	1	0	0	0	0	2	1	0	15.2	15.2	15.2	13.742	125	125	0	11.71	0	0	0	15.2
tr|C9JZN1|C9JZN1_HUMANGuaninenucleotide-bindingproteinG(I)/G(S)/G(T)subunitbeta-2(Fragment)OS=HomosapiensGN=GNB2PE=1SV=1;tr|C9JIS1|C9JIS1_HUMANGuaninenucleotide-bindingproteinG(I)/G(S)/G(T)subunitbeta-2(Fragment)OS=HomosapiensGN=GNB2PE=1SV=1;tr|C9JXA5|C9JXA5_HUMANGuaninenucleotide-bindingproteinG(I)/G(S)/G(T)subunitbeta-2(Fragment)OS=HomosapiensGN=GNB2PE=1SV=1;sp|Q9HAV0|GBB4_HUMANGuaninenucleotid…	tr|C9JZN1|C9JZN1_HUMANGuaninenucleotide-bindingproteinG(I)/G(S)/G(T)subunitbeta-2(Fragment)OS=HomosapiensGN=GNB2PE=1SV=1;tr|C9JIS1|C9JIS1_HUMANGuaninenucleotide-bindingproteinG(I)/G(S)/G(T)subunitbeta-2(Fragment)OS=HomosapiensGN=GNB2PE=1SV=1;tr|C9JXA5|C9JXA5_HUMANGuaninenucleotide-bindingproteinG(I)/G(S)/G(T)subunitbeta-2(Fragment)OS=HomosapiensGN=GNB2PE=1SV=1;sp|Q9HAV0|GBB4_HUMANGuaninenucleotid…	3331200	0	0	1	0	0	0	3331200	0	0	2;2;2;2;2;1;1;1;1;1;1	2;2;2;2;2;1;1;1;1;1;1	2;2;2;2;2;1;1;1;1;1;1	;;;;;;;;;;	11	2	2	2	0	0	0	1	1	0	0	0	0	1	1	0	0	0	0	1	1	0	11.8	11.8	11.8	17.032	152	152;232;251;340;340;79;108;163;165;296;340	0	12.26	0	0	0	4.6
tr|H7C2W9|H7C2W9_HUMAN60SribosomalproteinL31(Fragment)OS=HomosapiensGN=RPL31PE=1SV=1;tr|C9JU56|C9JU56_HUMAN60SribosomalproteinL31(Fragment)OS=HomosapiensGN=RPL31PE=1SV=1;tr|B7Z4E3|B7Z4E3_HUMAN60SribosomalproteinL31OS=HomosapiensGN=RPL31PE=1SV=1;sp|P62899|RL31_HUMAN60SribosomalproteinL31OS=HomosapiensGN=RPL31PE=1SV=1;tr|B7Z4C8|B7Z4C8_HUMAN60SribosomalproteinL31OS=HomosapiensGN=RPL31PE=1SV=1	tr|H7C2W9|H7C2W9_HUMAN60SribosomalproteinL31(Fragment)OS=HomosapiensGN=RPL31PE=1SV=1;tr|C9JU56|C9JU56_HUMAN60SribosomalproteinL31(Fragment)OS=HomosapiensGN=RPL31PE=1SV=1;tr|B7Z4E3|B7Z4E3_HUMAN60SribosomalproteinL31OS=HomosapiensGN=RPL31PE=1SV=1;sp|P62899|RL31_HUMAN60SribosomalproteinL31OS=HomosapiensGN=RPL31PE=1SV=1;tr|B7Z4C8|B7Z4C8_HUMAN60SribosomalproteinL31OS=HomosapiensGN=RPL31PE=1SV=1	0	1220600	0	1	0	0	0	0	1220600	0	1;1;1;1;1	1;1;1;1;1	1;1;1;1;1	;;;;	5	1	1	1	0	0	0	0	1	0	0	0	0	0	1	0	0	0	0	0	1	0	13	13	13	12.701	108	108;115;120;125;130	0	6.7396	0	0	0	0
tr|H0YAF8|H0YAF8_HUMANGuaninenucleotide-bindingproteinsubunitbeta-2-like1(Fragment)OS=HomosapiensGN=GNB2L1PE=1SV=1;tr|J3KPE3|J3KPE3_HUMANGuaninenucleotide-bindingproteinsubunitbeta-2-like1OS=HomosapiensGN=GNB2L1PE=1SV=1;tr|H0Y8W2|H0Y8W2_HUMANGuaninenucleotide-bindingproteinsubunitbeta-2-like1(Fragment)OS=HomosapiensGN=GNB2L1PE=1SV=1;sp|P63244|GBLP_HUMANGuaninenucleotide-bindingproteinsubunitbeta-…	tr|H0YAF8|H0YAF8_HUMANGuaninenucleotide-bindingproteinsubunitbeta-2-like1(Fragment)OS=HomosapiensGN=GNB2L1PE=1SV=1;tr|J3KPE3|J3KPE3_HUMANGuaninenucleotide-bindingproteinsubunitbeta-2-like1OS=HomosapiensGN=GNB2L1PE=1SV=1;tr|H0Y8W2|H0Y8W2_HUMANGuaninenucleotide-bindingproteinsubunitbeta-2-like1(Fragment)OS=HomosapiensGN=GNB2L1PE=1SV=1;sp|P63244|GBLP_HUMANGuaninenucleotide-bindingproteinsubunitbeta-…	0	7399000	0	1	0	0	0	0	7399000	0	3;3;3;3;2;2;2;2;2;2;2;2;1;1;1;1	3;3;3;3;2;2;2;2;2;2;2;2;1;1;1;1	3;3;3;3;2;2;2;2;2;2;2;2;1;1;1;1	;;;;;;;;;;;	16	3	3	3	0	0	0	0	3	1	0	0	0	0	3	1	0	0	0	0	3	1	19.7	19.7	19.7	21.934	198	198;273;274;317;147;153;194;198;233;237;247;300;83;101;269;321	0	22.69	0	0	0	0
tr|A0A087X1S2|A0A087X1S2_HUMANNuclease-sensitiveelement-bindingprotein1OS=HomosapiensGN=YBX1PE=1SV=2;sp|P67809|YBOX1_HUMANNuclease-sensitiveelement-bindingprotein1OS=HomosapiensGN=YBX1PE=1SV=3;tr|H0Y449|H0Y449_HUMANNuclease-sensitiveelement-bindingprotein1(Fragment)OS=HomosapiensGN=YBX1PE=1SV=1;sp|Q9Y2T7|YBOX2_HUMANY-box-bindingprotein2OS=HomosapiensGN=YBX2PE=1SV=2;tr|C9J5V9|C9J5V9_HUMANNuclease-…	tr|A0A087X1S2|A0A087X1S2_HUMANNuclease-sensitiveelement-bindingprotein1OS=HomosapiensGN=YBX1PE=1SV=2;sp|P67809|YBOX1_HUMANNuclease-sensitiveelement-bindingprotein1OS=HomosapiensGN=YBX1PE=1SV=3;tr|H0Y449|H0Y449_HUMANNuclease-sensitiveelement-bindingprotein1(Fragment)OS=HomosapiensGN=YBX1PE=1SV=1	26222000	0	0	1	0	0	0	26222000	0	0	5;5;3;2;1	5;5;3;2;1	2;2;2;0;1	;;	5	5	5	2	0	1	0	4	1	1	0	1	0	4	1	1	0	0	0	2	1	1	24.7	24.7	14.4	34.656	320	320;324;374;364;216	0	79.744	0	5	0	24.4
sp|P68133|ACTS_HUMANActin,alphaskeletalmuscleOS=HomosapiensGN=ACTA1PE=1SV=1;sp|P68032|ACTC_HUMANActin,alphacardiacmuscle1OS=HomosapiensGN=ACTC1PE=1SV=1;sp|P63267|ACTH_HUMANActin,gamma-entericsmoothmuscleOS=HomosapiensGN=ACTG2PE=1SV=1;sp|P62736|ACTA_HUMANActin,aorticsmoothmuscleOS=HomosapiensGN=ACTA2PE=1SV=1;tr|A6NL76|A6NL76_HUMANActin,alphaskeletalmuscleOS=HomosapiensGN=ACTA1PE=1SV=3;tr|F8WB63|F8…	sp|P68133|ACTS_HUMANActin,alphaskeletalmuscleOS=HomosapiensGN=ACTA1PE=1SV=1;sp|P68032|ACTC_HUMANActin,alphacardiacmuscle1OS=HomosapiensGN=ACTC1PE=1SV=1;sp|P63267|ACTH_HUMANActin,gamma-entericsmoothmuscleOS=HomosapiensGN=ACTG2PE=1SV=1;sp|P62736|ACTA_HUMANActin,aorticsmoothmuscleOS=HomosapiensGN=ACTA2PE=1SV=1;tr|A6NL76|A6NL76_HUMANActin,alphaskeletalmuscleOS=HomosapiensGN=ACTA1PE=1SV=3;tr|F8WB63|F8…	20831000	0	0	1	0	0	0	20831000	0	0	13;13;12;12;11;7;7;7;7;7	1;1;1;1;1;1;1;1;1;1	1;1;1;1;1;1;1;1;1;1	;;;;;;;;;	10	13	1	1	5	10	10	8	7	6	1	1	1	1	0	0	1	1	1	1	0	0	30.2	4.2	4.2	42.051	377	377;377;376;377;254;105;119;145;151;151	0	6.8174	15.6	27.3	27.3	23.3
sp|P78345|RPP38_HUMANRibonucleasePproteinsubunitp38OS=HomosapiensGN=RPP38PE=1SV=2;tr|Q5VUC9|Q5VUC9_HUMANRibonucleasePproteinsubunitp38OS=HomosapiensGN=RPP38PE=1SV=2;tr|Q5VUC3|Q5VUC3_HUMANRibonucleasePproteinsubunitp38(Fragment)OS=HomosapiensGN=RPP38PE=1SV=5	sp|P78345|RPP38_HUMANRibonucleasePproteinsubunitp38OS=HomosapiensGN=RPP38PE=1SV=2	5021300	0	0	1	0	0	0	5021300	0	0	4;1;1	4;1;1	4;1;1		3	4	4	4	0	0	0	3	1	0	0	0	0	3	1	0	0	0	0	3	1	0	17.3	17.3	17.3	31.834	283	283;145;169	0	25.141	0	0	0	13.1
sp|P82933|RT09_HUMAN28SribosomalproteinS9,mitochondrialOS=HomosapiensGN=MRPS9PE=1SV=2	sp|P82933|RT09_HUMAN28SribosomalproteinS9,mitochondrialOS=HomosapiensGN=MRPS9PE=1SV=2	0	1376300	0	1	0	0	0	0	1376300	0	1	1	1		1	1	1	1	0	0	0	0	1	0	0	0	0	0	1	0	0	0	0	0	1	0	3.3	3.3	3.3	45.834	396	396	0	7.0395	0	0	0	0
sp|Q01968|OCRL_HUMANInositolpolyphosphate5-phosphataseOCRL-1OS=HomosapiensGN=OCRLPE=1SV=3	sp|Q01968|OCRL_HUMANInositolpolyphosphate5-phosphataseOCRL-1OS=HomosapiensGN=OCRLPE=1SV=3	1472500	0	0	1	0	0	0	1472500	0	0	1	1	1		1	1	1	1	0	0	0	1	0	0	0	0	0	1	0	0	0	0	0	1	0	0	1.1	1.1	1.1	104.2	901	901	1	-2	0	0	0	1.1
sp|Q05481|ZNF91_HUMANZincfingerprotein91OS=HomosapiensGN=ZNF91PE=2SV=2	sp|Q05481|ZNF91_HUMANZincfingerprotein91OS=HomosapiensGN=ZNF91PE=2SV=2	12198000	0	0	1	0	0	0	12198000	0	0	1	1	1		1	1	1	1	0	0	0	1	0	0	0	0	0	1	0	0	0	0	0	1	0	0	1	1	1	137.22	1191	1191	0.0039448	6.2452	0	0	0	1
sp|Q09161|NCBP1_HUMANNuclearcap-bindingproteinsubunit1OS=HomosapiensGN=NCBP1PE=1SV=1	sp|Q09161|NCBP1_HUMANNuclearcap-bindingproteinsubunit1OS=HomosapiensGN=NCBP1PE=1SV=1	2765500	0	0	1	0	0	0	2765500	0	0	3	3	3		1	3	3	3	1	0	0	2	1	1	1	0	0	2	1	1	1	0	0	2	1	1	4.3	4.3	4.3	91.838	790	790	0	18.764	1.5	0	0	2.8
sp|Q13151|ROA0_HUMANHeterogeneousnuclearribonucleoproteinA0OS=HomosapiensGN=HNRNPA0PE=1SV=1	sp|Q13151|ROA0_HUMANHeterogeneousnuclearribonucleoproteinA0OS=HomosapiensGN=HNRNPA0PE=1SV=1	2065900	0	0	1	0	0	0	2065900	0	0	1	1	1		1	1	1	1	0	0	0	1	0	0	0	0	0	1	0	0	0	0	0	1	0	0	4.9	4.9	4.9	30.84	305	305	0	7.0782	0	0	0	4.9
sp|Q13243|SRSF5_HUMANSerine/arginine-richsplicingfactor5OS=HomosapiensGN=SRSF5PE=1SV=1;tr|B4DJK0|B4DJK0_HUMANSerine/arginine-rich-splicingfactor5OS=HomosapiensGN=SRSF5PE=1SV=1;tr|B4DUA4|B4DUA4_HUMANSerine/arginine-rich-splicingfactor5OS=HomosapiensGN=SRSF5PE=1SV=1;tr|G3V5K8|G3V5K8_HUMANSerine/arginine-rich-splicingfactor5OS=HomosapiensGN=SRSF5PE=1SV=1;tr|A0A0D9SEM4|A0A0D9SEM4_HUMANSerine/arginine…	sp|Q13243|SRSF5_HUMANSerine/arginine-richsplicingfactor5OS=HomosapiensGN=SRSF5PE=1SV=1;tr|B4DJK0|B4DJK0_HUMANSerine/arginine-rich-splicingfactor5OS=HomosapiensGN=SRSF5PE=1SV=1;tr|B4DUA4|B4DUA4_HUMANSerine/arginine-rich-splicingfactor5OS=HomosapiensGN=SRSF5PE=1SV=1	9910800	22887000	0	1	0	0	0	9910800	22887000	0	5;3;3;2;1;1	5;3;3;2;1;1	4;2;2;2;0;0	;;	6	5	5	4	0	0	0	4	3	1	0	0	0	4	3	1	0	0	0	3	2	1	22.4	22.4	19.1	31.263	272	272;124;138;99;378;494	0	41.832	0	0	0	17.3
tr|B1ANR0|B1ANR0_HUMANPolyadenylate-bindingproteinOS=HomosapiensGN=PABPC4PE=1SV=1;sp|Q13310|PABP4_HUMANPolyadenylate-bindingprotein4OS=HomosapiensGN=PABPC4PE=1SV=1;tr|H0Y5F5|H0Y5F5_HUMANPolyadenylate-bindingprotein(Fragment)OS=HomosapiensGN=PABPC4PE=1SV=1;tr|H0YCC8|H0YCC8_HUMANPolyadenylate-bindingprotein4(Fragment)OS=HomosapiensGN=PABPC4PE=1SV=1;tr|H0YEQ8|H0YEQ8_HUMANPolyadenylate-bindingprotein…	tr|B1ANR0|B1ANR0_HUMANPolyadenylate-bindingproteinOS=HomosapiensGN=PABPC4PE=1SV=1;sp|Q13310|PABP4_HUMANPolyadenylate-bindingprotein4OS=HomosapiensGN=PABPC4PE=1SV=1;tr|H0Y5F5|H0Y5F5_HUMANPolyadenylate-bindingprotein(Fragment)OS=HomosapiensGN=PABPC4PE=1SV=1;tr|H0YCC8|H0YCC8_HUMANPolyadenylate-bindingprotein4(Fragment)OS=HomosapiensGN=PABPC4PE=1SV=1	2379300	0	0	1	0	0	0	2379300	0	0	7;7;5;4;2	2;2;2;2;1	2;2;2;2;1	;;;	5	7	2	2	0	4	2	5	2	2	0	0	0	2	0	0	0	0	0	2	0	0	14	3.9	3.9	67.97	615	615;644;550;197;112	0	12.05	0	6.2	5.7	9.8
sp|Q13347|EIF3I_HUMANEukaryotictranslationinitiationfactor3subunitIOS=HomosapiensGN=EIF3IPE=1SV=1;tr|Q5TFK1|Q5TFK1_HUMANEukaryotictranslationinitiationfactor3subunitI(Fragment)OS=HomosapiensGN=EIF3IPE=1SV=1	sp|Q13347|EIF3I_HUMANEukaryotictranslationinitiationfactor3subunitIOS=HomosapiensGN=EIF3IPE=1SV=1	9534700	0	0	1	0	0	0	9534700	0	0	3;1	3;1	3;1		2	3	3	3	0	1	0	2	0	0	0	1	0	2	0	0	0	1	0	2	0	0	10.8	10.8	10.8	36.501	325	325;125	0	19.856	0	2.8	0	8
sp|Q13573|SNW1_HUMANSNWdomain-containingprotein1OS=HomosapiensGN=SNW1PE=1SV=1;tr|G3V3A4|G3V3A4_HUMANSNWdomain-containingprotein1OS=HomosapiensGN=SNW1PE=1SV=1;tr|G3V4X8|G3V4X8_HUMANSNWdomain-containingprotein1OS=HomosapiensGN=SNW1PE=1SV=1;tr|G3V5R3|G3V5R3_HUMANSNWdomain-containingprotein1(Fragment)OS=HomosapiensGN=SNW1PE=1SV=1	sp|Q13573|SNW1_HUMANSNWdomain-containingprotein1OS=HomosapiensGN=SNW1PE=1SV=1;tr|G3V3A4|G3V3A4_HUMANSNWdomain-containingprotein1OS=HomosapiensGN=SNW1PE=1SV=1;tr|G3V4X8|G3V4X8_HUMANSNWdomain-containingprotein1OS=HomosapiensGN=SNW1PE=1SV=1	0	2106800	0	1	0	0	0	0	2106800	0	4;4;3;1	4;4;3;1	4;4;3;1	;;	4	4	4	4	0	1	1	1	1	0	0	1	1	1	1	0	0	1	1	1	1	0	9.5	9.5	9.5	61.494	536	536;571;374;185	0	25.549	0	2.4	2.6	1.9
sp|Q13601|KRR1_HUMANKRR1smallsubunitprocessomecomponenthomologOS=HomosapiensGN=KRR1PE=1SV=4;tr|A0A087WZC7|A0A087WZC7_HUMANKRR1smallsubunitprocessomecomponenthomologOS=HomosapiensGN=KRR1PE=1SV=1	sp|Q13601|KRR1_HUMANKRR1smallsubunitprocessomecomponenthomologOS=HomosapiensGN=KRR1PE=1SV=4;tr|A0A087WZC7|A0A087WZC7_HUMANKRR1smallsubunitprocessomecomponenthomologOS=HomosapiensGN=KRR1PE=1SV=1	0	5886300	0	1	0	0	0	0	5886300	0	2;1	2;1	2;1	;	2	2	2	2	0	0	0	0	2	1	0	0	0	0	2	1	0	0	0	0	2	1	6.8	6.8	6.8	43.664	381	381;288	0	16.891	0	0	0	0
sp|Q14247|SRC8_HUMANSrcsubstratecortactinOS=HomosapiensGN=CTTNPE=1SV=2	sp|Q14247|SRC8_HUMANSrcsubstratecortactinOS=HomosapiensGN=CTTNPE=1SV=2	2458300	0	0	1	0	0	0	2458300	0	0	1	1	1		1	1	1	1	0	0	0	1	0	0	0	0	0	1	0	0	0	0	0	1	0	0	2	2	2	61.585	550	550	0.002008	6.3172	0	0	0	2
tr|H7C4H8|H7C4H8_HUMANHistoneRNAhairpin-bindingprotein(Fragment)OS=HomosapiensGN=SLBPPE=1SV=1;sp|Q14493|SLBP_HUMANHistoneRNAhairpin-bindingproteinOS=HomosapiensGN=SLBPPE=1SV=1;tr|F8W8D3|F8W8D3_HUMANHistoneRNAhairpin-bindingproteinOS=HomosapiensGN=SLBPPE=1SV=1	tr|H7C4H8|H7C4H8_HUMANHistoneRNAhairpin-bindingprotein(Fragment)OS=HomosapiensGN=SLBPPE=1SV=1;sp|Q14493|SLBP_HUMANHistoneRNAhairpin-bindingproteinOS=HomosapiensGN=SLBPPE=1SV=1;tr|F8W8D3|F8W8D3_HUMANHistoneRNAhairpin-bindingproteinOS=HomosapiensGN=SLBPPE=1SV=1	445990	0	0	1	0	0	0	445990	0	0	1;1;1	1;1;1	1;1;1	;;	3	1	1	1	0	0	0	1	0	0	0	0	0	1	0	0	0	0	0	1	0	0	7.5	7.5	7.5	21.231	186	186;270;277	0.004008	6.2961	0	0	0	7.5
sp|Q14692|BMS1_HUMANRibosomebiogenesisproteinBMS1homologOS=HomosapiensGN=BMS1PE=1SV=1	sp|Q14692|BMS1_HUMANRibosomebiogenesisproteinBMS1homologOS=HomosapiensGN=BMS1PE=1SV=1	8217100	0	0	1	0	0	0	8217100	0	0	4	4	4		1	4	4	4	0	0	0	4	0	1	0	0	0	4	0	1	0	0	0	4	0	1	3.3	3.3	3.3	145.81	1282	1282	0	26.664	0	0	0	3.3
sp|Q15006|EMC2_HUMANERmembraneproteincomplexsubunit2OS=HomosapiensGN=EMC2PE=1SV=1;tr|H0YAS9|H0YAS9_HUMANERmembraneproteincomplexsubunit2(Fragment)OS=HomosapiensGN=EMC2PE=1SV=1	sp|Q15006|EMC2_HUMANERmembraneproteincomplexsubunit2OS=HomosapiensGN=EMC2PE=1SV=1;tr|H0YAS9|H0YAS9_HUMANERmembraneproteincomplexsubunit2(Fragment)OS=HomosapiensGN=EMC2PE=1SV=1	2343000	0	0	1	0	0	0	2343000	0	0	2;1	2;1	2;1	;	2	2	2	2	0	0	0	2	0	0	0	0	0	2	0	0	0	0	0	2	0	0	7.1	7.1	7.1	34.833	297	297;135	0	13.817	0	0	0	7.1
sp|Q15007|FL2D_HUMANPre-mRNA-splicingregulatorWTAPOS=HomosapiensGN=WTAPPE=1SV=2;tr|A0A087X1R4|A0A087X1R4_HUMANPre-mRNA-splicingregulatorWTAPOS=HomosapiensGN=WTAPPE=1SV=1	sp|Q15007|FL2D_HUMANPre-mRNA-splicingregulatorWTAPOS=HomosapiensGN=WTAPPE=1SV=2;tr|A0A087X1R4|A0A087X1R4_HUMANPre-mRNA-splicingregulatorWTAPOS=HomosapiensGN=WTAPPE=1SV=1	8350900	0	0	1	0	0	0	8350900	0	0	5;3	5;3	5;3	;	2	5	5	5	0	0	1	4	1	1	0	0	1	4	1	1	0	0	1	4	1	1	17.4	17.4	17.4	44.243	396	396;170	0	82.589	0	0	3.3	13.9
sp|Q15050|RRS1_HUMANRibosomebiogenesisregulatoryproteinhomologOS=HomosapiensGN=RRS1PE=1SV=2	sp|Q15050|RRS1_HUMANRibosomebiogenesisregulatoryproteinhomologOS=HomosapiensGN=RRS1PE=1SV=2	0	4882900	0	1	0	0	0	0	4882900	0	5	5	5		1	5	5	5	0	0	0	1	3	2	0	0	0	1	3	2	0	0	0	1	3	2	20	20	20	41.193	365	365	0	31.454	0	0	0	4.7
sp|Q15131|CDK10_HUMANCyclin-dependentkinase10OS=HomosapiensGN=CDK10PE=1SV=1	sp|Q15131|CDK10_HUMANCyclin-dependentkinase10OS=HomosapiensGN=CDK10PE=1SV=1	764210	0	0	1	0	0	0	764210	0	0	1	1	1		1	1	1	1	0	0	0	1	0	0	0	0	0	1	0	0	0	0	0	1	0	0	3.1	3.1	3.1	41.038	360	360	0.0056711	6.0456	0	0	0	3.1
sp|Q16560|U1SBP_HUMANU11/U12smallnuclearribonucleoprotein35kDaproteinOS=HomosapiensGN=SNRNP35PE=1SV=1	sp|Q16560|U1SBP_HUMANU11/U12smallnuclearribonucleoprotein35kDaproteinOS=HomosapiensGN=SNRNP35PE=1SV=1	0	1219000	0	1	0	0	0	0	1219000	0	2	2	2		1	2	2	2	1	0	0	0	1	0	1	0	0	0	1	0	1	0	0	0	1	0	8.9	8.9	8.9	29.45	246	246	0	12.213	3.3	0	0	0
tr|E7EQZ4|E7EQZ4_HUMANSurvivalmotorneuronproteinOS=HomosapiensGN=SMN1PE=1SV=1;sp|Q16637|SMN_HUMANSurvivalmotorneuronproteinOS=HomosapiensGN=SMN1PE=1SV=1;tr|B4DP61|B4DP61_HUMANSurvivalmotorneuronproteinOS=HomosapiensGN=SMN1PE=1SV=1	tr|E7EQZ4|E7EQZ4_HUMANSurvivalmotorneuronproteinOS=HomosapiensGN=SMN1PE=1SV=1;sp|Q16637|SMN_HUMANSurvivalmotorneuronproteinOS=HomosapiensGN=SMN1PE=1SV=1;tr|B4DP61|B4DP61_HUMANSurvivalmotorneuronproteinOS=HomosapiensGN=SMN1PE=1SV=1	2605700	0	0	1	0	0	0	2605700	0	0	2;2;1	2;2;1	2;2;1	;;	3	2	2	2	0	0	0	1	1	1	0	0	0	1	1	1	0	0	0	1	1	1	9.5	9.5	9.5	31.689	294	294;294;227	0	13.213	0	0	0	3.4
sp|Q16769|QPCT_HUMANGlutaminyl-peptidecyclotransferaseOS=HomosapiensGN=QPCTPE=1SV=1;tr|B5MCZ9|B5MCZ9_HUMANGlutaminyl-peptidecyclotransferase(Fragment)OS=HomosapiensGN=QPCTPE=1SV=1;tr|C9JS14|C9JS14_HUMANGlutaminyl-peptidecyclotransferase(Fragment)OS=HomosapiensGN=QPCTPE=1SV=5	sp|Q16769|QPCT_HUMANGlutaminyl-peptidecyclotransferaseOS=HomosapiensGN=QPCTPE=1SV=1;tr|B5MCZ9|B5MCZ9_HUMANGlutaminyl-peptidecyclotransferase(Fragment)OS=HomosapiensGN=QPCTPE=1SV=1	75185000	0	0	1	0	0	0	75185000	0	0	6;5;2	6;5;2	6;5;2	;	3	6	6	6	1	0	0	6	1	1	1	0	0	6	1	1	1	0	0	6	1	1	22.7	22.7	22.7	40.876	361	361;284;118	0	100.84	3.9	0	0	22.7
sp|Q53HL2|BOREA_HUMANBorealinOS=HomosapiensGN=CDCA8PE=1SV=2	sp|Q53HL2|BOREA_HUMANBorealinOS=HomosapiensGN=CDCA8PE=1SV=2	0	6343600	0	1	0	0	0	0	6343600	0	3	3	3		1	3	3	3	0	0	0	0	3	1	0	0	0	0	3	1	0	0	0	0	3	1	14.6	14.6	14.6	31.323	280	280	0	18.843	0	0	0	0
sp|Q562R1|ACTBL_HUMANBeta-actin-likeprotein2OS=HomosapiensGN=ACTBL2PE=1SV=2	sp|Q562R1|ACTBL_HUMANBeta-actin-likeprotein2OS=HomosapiensGN=ACTBL2PE=1SV=2	0	85673000	0	1	0	0	0	0	85673000	0	6	1	1		1	6	1	1	2	4	3	3	3	2	0	0	0	0	1	0	0	0	0	0	1	0	16.2	4.8	4.8	42.003	376	376	0	6.9678	6.1	11.4	8.5	8.2
sp|Q5JVF3|PCID2_HUMANPCIdomain-containingprotein2OS=HomosapiensGN=PCID2PE=1SV=2	sp|Q5JVF3|PCID2_HUMANPCIdomain-containingprotein2OS=HomosapiensGN=PCID2PE=1SV=2	0	5559300	0	1	0	0	0	0	5559300	0	2	2	2		1	2	2	2	0	0	0	0	2	1	0	0	0	0	2	1	0	0	0	0	2	1	6.5	6.5	6.5	46.029	399	399	0	12.336	0	0	0	0
sp|Q5T2N8|ATD3C_HUMANATPasefamilyAAAdomain-containingprotein3COS=HomosapiensGN=ATAD3CPE=2SV=2;tr|Q5SV16|Q5SV16_HUMANATPasefamilyAAAdomain-containingprotein3A(Fragment)OS=HomosapiensGN=ATAD3APE=1SV=1;tr|H0Y2W2|H0Y2W2_HUMANATPasefamilyAAAdomain-containingprotein3A(Fragment)OS=HomosapiensGN=ATAD3APE=1SV=1;sp|Q9NVI7|ATD3A_HUMANATPasefamilyAAAdomain-containingprotein3AOS=HomosapiensGN=ATAD3APE=1SV=2;s…	sp|Q5T2N8|ATD3C_HUMANATPasefamilyAAAdomain-containingprotein3COS=HomosapiensGN=ATAD3CPE=2SV=2;tr|Q5SV16|Q5SV16_HUMANATPasefamilyAAAdomain-containingprotein3A(Fragment)OS=HomosapiensGN=ATAD3APE=1SV=1;tr|H0Y2W2|H0Y2W2_HUMANATPasefamilyAAAdomain-containingprotein3A(Fragment)OS=HomosapiensGN=ATAD3APE=1SV=1;sp|Q9NVI7|ATD3A_HUMANATPasefamilyAAAdomain-containingprotein3AOS=HomosapiensGN=ATAD3APE=1SV=2;s…	23273000	0	0	1	0	0	0	23273000	0	0	2;1;1;1;1	2;1;1;1;1	2;1;1;1;1	;;;;	5	2	2	2	1	0	1	1	0	0	1	0	1	1	0	0	1	0	1	1	0	0	3.9	3.9	3.9	46.379	411	411;201;572;634;648	0	11.345	1.7	0	2.2	1.7
sp|Q5T440|CAF17_HUMANPutativetransferaseCAF17,mitochondrialOS=HomosapiensGN=IBA57PE=1SV=1	sp|Q5T440|CAF17_HUMANPutativetransferaseCAF17,mitochondrialOS=HomosapiensGN=IBA57PE=1SV=1	0	0	0	1	0	0	0	0	0	0	1	1	1		1	1	1	1	0	0	0	1	0	0	0	0	0	1	0	0	0	0	0	1	0	0	4.2	4.2	4.2	38.155	356	356	0	9.7881	0	0	0	4.2
sp|Q5W0B1|RN219_HUMANRINGfingerprotein219OS=HomosapiensGN=RNF219PE=1SV=1	sp|Q5W0B1|RN219_HUMANRINGfingerprotein219OS=HomosapiensGN=RNF219PE=1SV=1	2057300	0	0	1	0	0	0	2057300	0	0	2	2	2		1	2	2	2	1	2	0	1	0	0	1	2	0	1	0	0	1	2	0	1	0	0	2.3	2.3	2.3	81.116	726	726	0	11.97	1.2	2.3	0	1.2
sp|Q6P087|RUSD3_HUMANRNApseudouridylatesynthasedomain-containingprotein3OS=HomosapiensGN=RPUSD3PE=1SV=3;tr|C9JM75|C9JM75_HUMANRNApseudouridylatesynthasedomain-containingprotein3OS=HomosapiensGN=RPUSD3PE=1SV=1;tr|H7C454|H7C454_HUMANRNApseudouridylatesynthasedomain-containingprotein3(Fragment)OS=HomosapiensGN=RPUSD3PE=1SV=1;tr|H7C2C3|H7C2C3_HUMANRNApseudouridylatesynthasedomain-containingprotein3(F…	sp|Q6P087|RUSD3_HUMANRNApseudouridylatesynthasedomain-containingprotein3OS=HomosapiensGN=RPUSD3PE=1SV=3	14893000	0	0	1	0	0	0	14893000	0	0	7;3;3;2;2;2	7;3;3;2;2;2	7;3;3;2;2;2		6	7	7	7	0	0	0	5	1	1	0	0	0	5	1	1	0	0	0	5	1	1	21.9	21.9	21.9	38.46	351	351;212;246;144;151;280	0	47.651	0	0	0	13.1
sp|Q6PK04|CC137_HUMANCoiled-coildomain-containingprotein137OS=HomosapiensGN=CCDC137PE=1SV=1;tr|I3L0U5|I3L0U5_HUMANCoiled-coildomain-containingprotein137(Fragment)OS=HomosapiensGN=CCDC137PE=1SV=1	sp|Q6PK04|CC137_HUMANCoiled-coildomain-containingprotein137OS=HomosapiensGN=CCDC137PE=1SV=1;tr|I3L0U5|I3L0U5_HUMANCoiled-coildomain-containingprotein137(Fragment)OS=HomosapiensGN=CCDC137PE=1SV=1	0	1414700	0	1	0	0	0	0	1414700	0	1;1	1;1	1;1	;	2	1	1	1	0	0	0	0	1	0	0	0	0	0	1	0	0	0	0	0	1	0	6.2	6.2	6.2	33.231	289	289;292	1	-2	0	0	0	0
sp|Q6UXN9|WDR82_HUMANWDrepeat-containingprotein82OS=HomosapiensGN=WDR82PE=1SV=1	sp|Q6UXN9|WDR82_HUMANWDrepeat-containingprotein82OS=HomosapiensGN=WDR82PE=1SV=1	2452100	0	0	1	0	0	0	2452100	0	0	3	3	3		1	3	3	3	0	0	0	3	1	0	0	0	0	3	1	0	0	0	0	3	1	0	8.6	8.6	8.6	35.079	313	313	0	17.744	0	0	0	8.6
sp|Q6ZN17|LN28B_HUMANProteinlin-28homologBOS=HomosapiensGN=LIN28BPE=1SV=1	sp|Q6ZN17|LN28B_HUMANProteinlin-28homologBOS=HomosapiensGN=LIN28BPE=1SV=1	5567900	0	0	1	0	0	0	5567900	0	0	2	2	2		1	2	2	2	0	0	0	2	0	1	0	0	0	2	0	1	0	0	0	2	0	1	15.2	15.2	15.2	27.083	250	250	0	13.472	0	0	0	15.2
sp|Q6ZVZ8|ASB18_HUMANAnkyrinrepeatandSOCSboxprotein18OS=HomosapiensGN=ASB18PE=2SV=2	sp|Q6ZVZ8|ASB18_HUMANAnkyrinrepeatandSOCSboxprotein18OS=HomosapiensGN=ASB18PE=2SV=2	99213000	0	0	1	0	0	0	99213000	0	0	1	1	1		1	1	1	1	0	0	0	1	0	0	0	0	0	1	0	0	0	0	0	1	0	0	4.9	4.9	4.9	50.803	466	466	0.0039604	6.2534	0	0	0	4.9
sp|Q7Z3E2|CC186_HUMANCoiled-coildomain-containingprotein186OS=HomosapiensGN=CCDC186PE=1SV=2	sp|Q7Z3E2|CC186_HUMANCoiled-coildomain-containingprotein186OS=HomosapiensGN=CCDC186PE=1SV=2	0	0	0	1	0	0	0	0	0	0	1	1	1		1	1	1	1	0	0	0	1	0	0	0	0	0	1	0	0	0	0	0	1	0	0	1.3	1.3	1.3	103.69	898	898	0.0020747	6.4323	0	0	0	1.3
sp|Q86SE9|PCGF5_HUMANPolycombgroupRINGfingerprotein5OS=HomosapiensGN=PCGF5PE=1SV=1	sp|Q86SE9|PCGF5_HUMANPolycombgroupRINGfingerprotein5OS=HomosapiensGN=PCGF5PE=1SV=1	0	0	0	1	0	0	0	0	0	0	1	1	1		1	1	1	1	1	0	0	0	0	0	1	0	0	0	0	0	1	0	0	0	0	0	4.3	4.3	4.3	29.714	256	256	0.0020243	6.364	4.3	0	0	0
sp|Q86Y07|VRK2_HUMANSerine/threonine-proteinkinaseVRK2OS=HomosapiensGN=VRK2PE=1SV=3	sp|Q86Y07|VRK2_HUMANSerine/threonine-proteinkinaseVRK2OS=HomosapiensGN=VRK2PE=1SV=3	0	4660500	0	1	0	0	0	0	4660500	0	2	2	2		1	2	2	2	0	0	0	0	2	1	0	0	0	0	2	1	0	0	0	0	2	1	5.9	5.9	5.9	58.14	508	508	0	12.529	0	0	0	0
sp|Q8IUX4|ABC3F_HUMANDNAdC->dU-editingenzymeAPOBEC-3FOS=HomosapiensGN=APOBEC3FPE=1SV=3	sp|Q8IUX4|ABC3F_HUMANDNAdC->dU-editingenzymeAPOBEC-3FOS=HomosapiensGN=APOBEC3FPE=1SV=3	2248000	0	0	1	0	0	0	2248000	0	0	1	1	1		1	1	1	1	0	0	0	1	0	0	0	0	0	1	0	0	0	0	0	1	0	0	2.7	2.7	2.7	45.02	373	373	0	6.706	0	0	0	2.7
sp|Q8IWX8|CHERP_HUMANCalciumhomeostasisendoplasmicreticulumproteinOS=HomosapiensGN=CHERPPE=1SV=3;tr|J3QK89|J3QK89_HUMANCalciumhomeostasisendoplasmicreticulumproteinOS=HomosapiensGN=CHERPPE=1SV=1	sp|Q8IWX8|CHERP_HUMANCalciumhomeostasisendoplasmicreticulumproteinOS=HomosapiensGN=CHERPPE=1SV=3;tr|J3QK89|J3QK89_HUMANCalciumhomeostasisendoplasmicreticulumproteinOS=HomosapiensGN=CHERPPE=1SV=1	2011600	0	0	1	0	0	0	2011600	0	0	2;2	2;2	2;2	;	2	2	2	2	1	1	0	1	0	0	1	1	0	1	0	0	1	1	0	1	0	0	2.3	2.3	2.3	103.7	916	916;927	0	12.764	1.5	0.8	0	1.5
sp|Q8N954|GPT11_HUMANGpatchdomain-containingprotein11OS=HomosapiensGN=GPATCH11PE=1SV=3;tr|A0A0A0MSF9|A0A0A0MSF9_HUMANGpatchdomain-containingprotein11OS=HomosapiensGN=GPATCH11PE=1SV=1	sp|Q8N954|GPT11_HUMANGpatchdomain-containingprotein11OS=HomosapiensGN=GPATCH11PE=1SV=3;tr|A0A0A0MSF9|A0A0A0MSF9_HUMANGpatchdomain-containingprotein11OS=HomosapiensGN=GPATCH11PE=1SV=1	0	2287400	0	1	0	0	0	0	2287400	0	3;3	3;3	3;3	;	2	3	3	3	0	0	0	1	1	1	0	0	0	1	1	1	0	0	0	1	1	1	11.6	11.6	11.6	30.198	259	259;285	0	17.063	0	0	0	2.7
tr|H0Y3X1|H0Y3X1_HUMANHemicentin-2(Fragment)OS=HomosapiensGN=HMCN2PE=1SV=2;tr|A0A096LP30|A0A096LP30_HUMANHemicentin-2OS=HomosapiensGN=HMCN2PE=1SV=1;sp|Q8NDA2|HMCN2_HUMANHemicentin-2OS=HomosapiensGN=HMCN2PE=2SV=2	tr|H0Y3X1|H0Y3X1_HUMANHemicentin-2(Fragment)OS=HomosapiensGN=HMCN2PE=1SV=2;tr|A0A096LP30|A0A096LP30_HUMANHemicentin-2OS=HomosapiensGN=HMCN2PE=1SV=1;sp|Q8NDA2|HMCN2_HUMANHemicentin-2OS=HomosapiensGN=HMCN2PE=2SV=2	15056000	0	0	1	0	0	0	15056000	0	0	1;1;1	1;1;1	1;1;1	;;	3	1	1	1	1	0	0	1	0	0	1	0	0	1	0	0	1	0	0	1	0	0	4.5	4.5	4.5	33.758	309	309;5059;5065	0.0057803	6.1171	4.5	0	0	4.5
sp|Q8NEJ9|NGDN_HUMANNeuroguidinOS=HomosapiensGN=NGDNPE=1SV=1;tr|H0YJ17|H0YJ17_HUMANNeuroguidin(Fragment)OS=HomosapiensGN=NGDNPE=1SV=1;tr|G3V4G1|G3V4G1_HUMANNeuroguidin(Fragment)OS=HomosapiensGN=NGDNPE=1SV=5	sp|Q8NEJ9|NGDN_HUMANNeuroguidinOS=HomosapiensGN=NGDNPE=1SV=1;tr|H0YJ17|H0YJ17_HUMANNeuroguidin(Fragment)OS=HomosapiensGN=NGDNPE=1SV=1;tr|G3V4G1|G3V4G1_HUMANNeuroguidin(Fragment)OS=HomosapiensGN=NGDNPE=1SV=5	24781000	0	0	1	0	0	0	24781000	0	0	6;4;3	6;4;3	6;4;3	;;	3	6	6	6	0	0	0	5	1	2	0	0	0	5	1	2	0	0	0	5	1	2	23.8	23.8	23.8	35.894	315	315;263;142	0	66.922	0	0	0	18.1
tr|F8VTY2|F8VTY2_HUMANNucleoporinNup37(Fragment)OS=HomosapiensGN=NUP37PE=1SV=5;sp|Q8NFH4|NUP37_HUMANNucleoporinNup37OS=HomosapiensGN=NUP37PE=1SV=1	tr|F8VTY2|F8VTY2_HUMANNucleoporinNup37(Fragment)OS=HomosapiensGN=NUP37PE=1SV=5;sp|Q8NFH4|NUP37_HUMANNucleoporinNup37OS=HomosapiensGN=NUP37PE=1SV=1	5633900	0	0	1	0	0	0	5633900	0	0	4;4	4;4	4;4	;	2	4	4	4	0	0	1	3	0	0	0	0	1	3	0	0	0	0	1	3	0	0	15.8	15.8	15.8	23.353	209	209;326	0	24.649	0	0	6.2	13.9
sp|Q8NFH5|NUP53_HUMANNucleoporinNUP53OS=HomosapiensGN=NUP35PE=1SV=1	sp|Q8NFH5|NUP53_HUMANNucleoporinNUP53OS=HomosapiensGN=NUP35PE=1SV=1	863370	0	0	1	0	0	0	863370	0	0	1	1	1		1	1	1	1	0	0	0	1	0	0	0	0	0	1	0	0	0	0	0	1	0	0	4	4	4	34.773	326	326	0.005848	6.1598	0	0	0	4
sp|Q8TF72|SHRM3_HUMANProteinShroom3OS=HomosapiensGN=SHROOM3PE=1SV=2	sp|Q8TF72|SHRM3_HUMANProteinShroom3OS=HomosapiensGN=SHROOM3PE=1SV=2	72837000	0	0	1	0	0	0	72837000	0	0	1	1	1		1	1	1	1	1	1	1	1	0	0	1	1	1	1	0	0	1	1	1	1	0	0	0.5	0.5	0.5	216.85	1996	1996	0	6.7394	0.5	0.5	0.5	0.5
tr|A0A087WWF1|A0A087WWF1_HUMANSelenoproteinMOS=HomosapiensGN=SELMPE=1SV=1;sp|Q8WWX9|SELM_HUMANSelenoproteinMOS=HomosapiensGN=SELMPE=1SV=3	tr|A0A087WWF1|A0A087WWF1_HUMANSelenoproteinMOS=HomosapiensGN=SELMPE=1SV=1;sp|Q8WWX9|SELM_HUMANSelenoproteinMOS=HomosapiensGN=SELMPE=1SV=3	1853000	0	0	1	0	0	0	1853000	0	0	1;1	1;1	1;1	;	2	1	1	1	0	0	0	1	0	0	0	0	0	1	0	0	0	0	0	1	0	0	9.7	9.7	9.7	16.081	144	144;145	0	12.179	0	0	0	9.7
sp|Q8WXF0|SRS12_HUMANSerine/arginine-richsplicingfactor12OS=HomosapiensGN=SRSF12PE=2SV=1;tr|E5RFT0|E5RFT0_HUMANSerine/arginine-rich-splicingfactor12OS=HomosapiensGN=SRSF12PE=1SV=1;tr|E5RJS0|E5RJS0_HUMANSerine/arginine-rich-splicingfactor12OS=HomosapiensGN=SRSF12PE=1SV=1	sp|Q8WXF0|SRS12_HUMANSerine/arginine-richsplicingfactor12OS=HomosapiensGN=SRSF12PE=2SV=1	1537100	0	0	1	0	0	0	1537100	0	0	5;1;1	2;1;1	2;1;1		3	5	2	2	1	0	0	4	2	4	0	0	0	1	0	1	0	0	0	1	0	1	17.6	8.8	8.8	30.512	261	261;41;42	0	12.717	4.2	0	0	13
sp|Q96B26|EXOS8_HUMANExosomecomplexcomponentRRP43OS=HomosapiensGN=EXOSC8PE=1SV=1	sp|Q96B26|EXOS8_HUMANExosomecomplexcomponentRRP43OS=HomosapiensGN=EXOSC8PE=1SV=1	8724000	0	0	1	0	0	0	8724000	0	0	3	3	3		1	3	3	3	0	0	0	3	0	1	0	0	0	3	0	1	0	0	0	3	0	1	14.9	14.9	14.9	30.039	276	276	0	61.043	0	0	0	14.9
sp|Q96CX2|KCD12_HUMANBTB/POZdomain-containingproteinKCTD12OS=HomosapiensGN=KCTD12PE=1SV=1;sp|Q68DU8|KCD16_HUMANBTB/POZdomain-containingproteinKCTD16OS=HomosapiensGN=KCTD16PE=2SV=1;sp|Q6ZWB6|KCTD8_HUMANBTB/POZdomain-containingproteinKCTD8OS=HomosapiensGN=KCTD8PE=2SV=1	sp|Q96CX2|KCD12_HUMANBTB/POZdomain-containingproteinKCTD12OS=HomosapiensGN=KCTD12PE=1SV=1;sp|Q68DU8|KCD16_HUMANBTB/POZdomain-containingproteinKCTD16OS=HomosapiensGN=KCTD16PE=2SV=1;sp|Q6ZWB6|KCTD8_HUMANBTB/POZdomain-containingproteinKCTD8OS=HomosapiensGN=KCTD8PE=2SV=1	1684300	0	0	1	0	0	0	1684300	0	0	2;1;1	2;1;1	2;1;1	;;	3	2	2	2	0	0	0	2	0	0	0	0	0	2	0	0	0	0	0	2	0	0	5.5	5.5	5.5	35.7	325	325;428;473	0	11.819	0	0	0	5.5
tr|K7ENI5|K7ENI5_HUMANNucleoporinSEH1(Fragment)OS=HomosapiensGN=SEH1LPE=1SV=1;tr|K7ELV2|K7ELV2_HUMANNucleoporinSEH1(Fragment)OS=HomosapiensGN=SEH1LPE=1SV=1;sp|Q96EE3|SEH1_HUMANNucleoporinSEH1OS=HomosapiensGN=SEH1LPE=1SV=3;tr|K7EP88|K7EP88_HUMANNucleoporinSEH1(Fragment)OS=HomosapiensGN=SEH1LPE=1SV=1	tr|K7ENI5|K7ENI5_HUMANNucleoporinSEH1(Fragment)OS=HomosapiensGN=SEH1LPE=1SV=1;tr|K7ELV2|K7ELV2_HUMANNucleoporinSEH1(Fragment)OS=HomosapiensGN=SEH1LPE=1SV=1;sp|Q96EE3|SEH1_HUMANNucleoporinSEH1OS=HomosapiensGN=SEH1LPE=1SV=3;tr|K7EP88|K7EP88_HUMANNucleoporinSEH1(Fragment)OS=HomosapiensGN=SEH1LPE=1SV=1	4255600	0	0	1	0	0	0	4255600	0	0	2;2;2;1	2;2;2;1	2;2;2;1	;;;	4	2	2	2	0	0	0	2	0	0	0	0	0	2	0	0	0	0	0	2	0	0	15.2	15.2	15.2	17.617	158	158;263;360;189	0	13.302	0	0	0	15.2
sp|Q96ES7|SGF29_HUMANSAGA-associatedfactor29homologOS=HomosapiensGN=CCDC101PE=1SV=1	sp|Q96ES7|SGF29_HUMANSAGA-associatedfactor29homologOS=HomosapiensGN=CCDC101PE=1SV=1	1525300	0	0	1	0	0	0	1525300	0	0	1	1	1		1	1	1	1	0	0	0	1	0	0	0	0	0	1	0	0	0	0	0	1	0	0	4.4	4.4	4.4	33.238	293	293	0	7.8302	0	0	0	4.4
tr|B9A008|B9A008_HUMANU3smallnucleolarribonucleoproteinproteinIMP4(Fragment)OS=HomosapiensGN=IMP4PE=1SV=1;tr|E7ENR5|E7ENR5_HUMANU3smallnucleolarribonucleoproteinproteinIMP4(Fragment)OS=HomosapiensGN=IMP4PE=1SV=1;tr|H0Y714|H0Y714_HUMANU3smallnucleolarribonucleoproteinproteinIMP4(Fragment)OS=HomosapiensGN=IMP4PE=1SV=1;sp|Q96G21|IMP4_HUMANU3smallnucleolarribonucleoproteinproteinIMP4OS=HomosapiensGN=…	tr|B9A008|B9A008_HUMANU3smallnucleolarribonucleoproteinproteinIMP4(Fragment)OS=HomosapiensGN=IMP4PE=1SV=1;tr|E7ENR5|E7ENR5_HUMANU3smallnucleolarribonucleoproteinproteinIMP4(Fragment)OS=HomosapiensGN=IMP4PE=1SV=1;tr|H0Y714|H0Y714_HUMANU3smallnucleolarribonucleoproteinproteinIMP4(Fragment)OS=HomosapiensGN=IMP4PE=1SV=1;sp|Q96G21|IMP4_HUMANU3smallnucleolarribonucleoproteinproteinIMP4OS=HomosapiensGN=…	30143000	0	0	1	0	0	0	30143000	0	0	4;4;4;4;3	4;4;4;4;3	4;4;4;4;3	;;;;	5	4	4	4	0	0	0	4	1	1	0	0	0	4	1	1	0	0	0	4	1	1	27.9	27.9	27.9	19.619	172	172;236;280;291;248	0	59.613	0	0	0	27.9
sp|Q96I25|SPF45_HUMANSplicingfactor45OS=HomosapiensGN=RBM17PE=1SV=1;tr|H0Y6J6|H0Y6J6_HUMANSplicingfactor45(Fragment)OS=HomosapiensGN=RBM17PE=1SV=1;tr|Q5W012|Q5W012_HUMANSplicingfactor45(Fragment)OS=HomosapiensGN=RBM17PE=1SV=2;tr|Q5W011|Q5W011_HUMANSplicingfactor45(Fragment)OS=HomosapiensGN=RBM17PE=1SV=1;tr|Q5W010|Q5W010_HUMANSplicingfactor45(Fragment)OS=HomosapiensGN=RBM17PE=1SV=1	sp|Q96I25|SPF45_HUMANSplicingfactor45OS=HomosapiensGN=RBM17PE=1SV=1;tr|H0Y6J6|H0Y6J6_HUMANSplicingfactor45(Fragment)OS=HomosapiensGN=RBM17PE=1SV=1;tr|Q5W012|Q5W012_HUMANSplicingfactor45(Fragment)OS=HomosapiensGN=RBM17PE=1SV=2;tr|Q5W011|Q5W011_HUMANSplicingfactor45(Fragment)OS=HomosapiensGN=RBM17PE=1SV=1;tr|Q5W010|Q5W010_HUMANSplicingfactor45(Fragment)OS=HomosapiensGN=RBM17PE=1SV=1	10310000	0	0	1	0	0	0	10310000	0	0	4;3;3;2;2	4;3;3;2;2	4;3;3;2;2	;;;;	5	4	4	4	1	0	0	4	0	0	1	0	0	4	0	0	1	0	0	4	0	0	12.5	12.5	12.5	44.961	401	401;225;240;212;221	0	27.134	4	0	0	12.5
tr|Q5SY74|Q5SY74_HUMANKinetochore-associatedproteinNSL1homologOS=HomosapiensGN=NSL1PE=1SV=1;sp|Q96IY1|NSL1_HUMANKinetochore-associatedproteinNSL1homologOS=HomosapiensGN=NSL1PE=1SV=3	tr|Q5SY74|Q5SY74_HUMANKinetochore-associatedproteinNSL1homologOS=HomosapiensGN=NSL1PE=1SV=1;sp|Q96IY1|NSL1_HUMANKinetochore-associatedproteinNSL1homologOS=HomosapiensGN=NSL1PE=1SV=3	7393300	0	0	1	0	0	0	7393300	0	0	2;2	2;2	2;2	;	2	2	2	2	0	0	0	2	0	0	0	0	0	2	0	0	0	0	0	2	0	0	18.6	18.6	18.6	19.511	172	172;281	0	11.671	0	0	0	18.6
sp|Q96J01|THOC3_HUMANTHOcomplexsubunit3OS=HomosapiensGN=THOC3PE=1SV=1;tr|D6RGZ2|D6RGZ2_HUMANTHOcomplexsubunit3OS=HomosapiensGN=THOC3PE=1SV=1;tr|D6REC9|D6REC9_HUMANTHOcomplexsubunit3OS=HomosapiensGN=THOC3PE=1SV=1	sp|Q96J01|THOC3_HUMANTHOcomplexsubunit3OS=HomosapiensGN=THOC3PE=1SV=1;tr|D6RGZ2|D6RGZ2_HUMANTHOcomplexsubunit3OS=HomosapiensGN=THOC3PE=1SV=1	11964000	0	0	1	0	0	0	11964000	0	0	3;2;1	3;2;1	3;2;1	;	3	3	3	3	1	0	0	3	1	1	1	0	0	3	1	1	1	0	0	3	1	1	11.4	11.4	11.4	38.771	351	351;105;166	0	20.243	2.6	0	0	11.4
tr|F5H3X6|F5H3X6_HUMANProhibitin-2(Fragment)OS=HomosapiensGN=PHB2PE=1SV=2;tr|F5GY37|F5GY37_HUMANProhibitin-2OS=HomosapiensGN=PHB2PE=1SV=1;tr|J3KPX7|J3KPX7_HUMANProhibitin-2OS=HomosapiensGN=PHB2PE=1SV=2;sp|Q99623|PHB2_HUMANProhibitin-2OS=HomosapiensGN=PHB2PE=1SV=2;tr|F5H2D2|F5H2D2_HUMANProhibitin-2OS=HomosapiensGN=PHB2PE=1SV=1;tr|F5H0C5|F5H0C5_HUMANProhibitin-2OS=HomosapiensGN=PHB2PE=1SV=1;tr|F5GW…	tr|F5H3X6|F5H3X6_HUMANProhibitin-2(Fragment)OS=HomosapiensGN=PHB2PE=1SV=2;tr|F5GY37|F5GY37_HUMANProhibitin-2OS=HomosapiensGN=PHB2PE=1SV=1;tr|J3KPX7|J3KPX7_HUMANProhibitin-2OS=HomosapiensGN=PHB2PE=1SV=2;sp|Q99623|PHB2_HUMANProhibitin-2OS=HomosapiensGN=PHB2PE=1SV=2;tr|F5H2D2|F5H2D2_HUMANProhibitin-2OS=HomosapiensGN=PHB2PE=1SV=1;tr|F5H0C5|F5H0C5_HUMANProhibitin-2OS=HomosapiensGN=PHB2PE=1SV=1;tr|F5GW…	2074700	0	0	1	0	0	0	2074700	0	0	3;3;3;3;2;2;2	3;3;3;3;2;2;2	3;3;3;3;2;2;2	;;;;;;	7	3	3	3	0	0	0	2	1	0	0	0	0	2	1	0	0	0	0	2	1	0	17.8	17.8	17.8	23.615	213	213;267;298;299;87;112;261	0	18.429	0	0	0	11.7
tr|H7C515|H7C515_HUMANProteinCMSS1(Fragment)OS=HomosapiensGN=CMSS1PE=1SV=1;tr|C9J384|C9J384_HUMANProteinCMSS1(Fragment)OS=HomosapiensGN=CMSS1PE=1SV=1;sp|Q9BQ75|CMS1_HUMANProteinCMSS1OS=HomosapiensGN=CMSS1PE=1SV=2	tr|H7C515|H7C515_HUMANProteinCMSS1(Fragment)OS=HomosapiensGN=CMSS1PE=1SV=1;tr|C9J384|C9J384_HUMANProteinCMSS1(Fragment)OS=HomosapiensGN=CMSS1PE=1SV=1;sp|Q9BQ75|CMS1_HUMANProteinCMSS1OS=HomosapiensGN=CMSS1PE=1SV=2	0	1787600	0	1	0	0	0	0	1787600	0	1;1;1	1;1;1	1;1;1	;;	3	1	1	1	0	0	0	0	1	0	0	0	0	0	1	0	0	0	0	0	1	0	15.9	15.9	15.9	9.4951	82	82;225;279	0.0057143	6.0641	0	0	0	0
sp|Q9BU76|MMTA2_HUMANMultiplemyelomatumor-associatedprotein2OS=HomosapiensGN=MMTAG2PE=1SV=1	sp|Q9BU76|MMTA2_HUMANMultiplemyelomatumor-associatedprotein2OS=HomosapiensGN=MMTAG2PE=1SV=1	5075400	0	0	1	0	0	0	5075400	0	0	4	4	4		1	4	4	4	1	0	0	2	1	2	1	0	0	2	1	2	1	0	0	2	1	2	18.6	18.6	18.6	29.411	263	263	0	25.39	3.8	0	0	8.7
sp|Q9BWG6|SCNM1_HUMANSodiumchannelmodifier1OS=HomosapiensGN=SCNM1PE=1SV=1	sp|Q9BWG6|SCNM1_HUMANSodiumchannelmodifier1OS=HomosapiensGN=SCNM1PE=1SV=1	6504800	0	0	1	0	0	0	6504800	0	0	2	2	2		1	2	2	2	1	0	0	2	0	0	1	0	0	2	0	0	1	0	0	2	0	0	7.8	7.8	7.8	25.949	230	230	0	12.493	3.9	0	0	7.8
tr|A2A2L5|A2A2L5_HUMANProteinRTF2homolog(Fragment)OS=HomosapiensGN=RTFDC1PE=1SV=1;sp|Q9BY42|RTF2_HUMANProteinRTF2homologOS=HomosapiensGN=RTFDC1PE=1SV=3;tr|A0A0A0MQR2|A0A0A0MQR2_HUMANProteinRTF2homologOS=HomosapiensGN=RTFDC1PE=1SV=1;tr|A2A2L6|A2A2L6_HUMANProteinRTF2homologOS=HomosapiensGN=RTFDC1PE=1SV=1	tr|A2A2L5|A2A2L5_HUMANProteinRTF2homolog(Fragment)OS=HomosapiensGN=RTFDC1PE=1SV=1;sp|Q9BY42|RTF2_HUMANProteinRTF2homologOS=HomosapiensGN=RTFDC1PE=1SV=3;tr|A0A0A0MQR2|A0A0A0MQR2_HUMANProteinRTF2homologOS=HomosapiensGN=RTFDC1PE=1SV=1;tr|A2A2L6|A2A2L6_HUMANProteinRTF2homologOS=HomosapiensGN=RTFDC1PE=1SV=1	3767700	0	0	1	0	0	0	3767700	0	0	2;2;2;1	2;2;2;1	2;2;2;1	;;;	4	2	2	2	0	0	0	1	1	1	0	0	0	1	1	1	0	0	0	1	1	1	10.5	10.5	10.5	31.151	277	277;306;336;230	0	13.111	0	0	0	6.9
sp|Q9BZE4|NOG1_HUMANNucleolarGTP-bindingprotein1OS=HomosapiensGN=GTPBP4PE=1SV=3	sp|Q9BZE4|NOG1_HUMANNucleolarGTP-bindingprotein1OS=HomosapiensGN=GTPBP4PE=1SV=3	778770	0	0	1	0	0	0	778770	0	0	2	2	2		1	2	2	2	0	0	0	1	1	1	0	0	0	1	1	1	0	0	0	1	1	1	4.3	4.3	4.3	73.964	634	634	0	11.837	0	0	0	1.6
sp|Q9H0D6|XRN2_HUMAN5'-3'exoribonuclease2OS=HomosapiensGN=XRN2PE=1SV=1	sp|Q9H0D6|XRN2_HUMAN5'-3'exoribonuclease2OS=HomosapiensGN=XRN2PE=1SV=1	0	640310	0	1	0	0	0	0	640310	0	1	1	1		1	1	1	1	0	0	0	0	1	0	0	0	0	0	1	0	0	0	0	0	1	0	1.9	1.9	1.9	108.58	950	950	0	7.5155	0	0	0	0
tr|A0A024QZ33|A0A024QZ33_HUMANCoiled-coildomaincontaining55,isoformCRA_aOS=HomosapiensGN=CCDC55PE=1SV=1;sp|Q9H0G5|NSRP1_HUMANNuclearspecklesplicingregulatoryprotein1OS=HomosapiensGN=NSRP1PE=1SV=1	tr|A0A024QZ33|A0A024QZ33_HUMANCoiled-coildomaincontaining55,isoformCRA_aOS=HomosapiensGN=CCDC55PE=1SV=1;sp|Q9H0G5|NSRP1_HUMANNuclearspecklesplicingregulatoryprotein1OS=HomosapiensGN=NSRP1PE=1SV=1	0	0	0	1	0	0	0	0	0	0	1;1	1;1	1;1	;	2	1	1	1	0	0	0	1	0	0	0	0	0	1	0	0	0	0	0	1	0	0	2	2	2	60.441	504	504;558	0.0021008	6.5014	0	0	0	2
tr|C9J4X5|C9J4X5_HUMANInhibitorofgrowthprotein2(Fragment)OS=HomosapiensGN=ING2PE=1SV=1;sp|Q9H160|ING2_HUMANInhibitorofgrowthprotein2OS=HomosapiensGN=ING2PE=1SV=2	tr|C9J4X5|C9J4X5_HUMANInhibitorofgrowthprotein2(Fragment)OS=HomosapiensGN=ING2PE=1SV=1;sp|Q9H160|ING2_HUMANInhibitorofgrowthprotein2OS=HomosapiensGN=ING2PE=1SV=2	2085700	0	0	1	0	0	0	2085700	0	0	1;1	1;1	1;1	;	2	1	1	1	0	0	0	1	0	0	0	0	0	1	0	0	0	0	0	1	0	0	8.7	8.7	8.7	16.069	138	138;280	0	7.0644	0	0	0	8.7
tr|Q5JW53|Q5JW53_HUMANKinetochore-associatedproteinDSN1homolog(Fragment)OS=HomosapiensGN=DSN1PE=1SV=1;sp|Q9H410|DSN1_HUMANKinetochore-associatedproteinDSN1homologOS=HomosapiensGN=DSN1PE=1SV=2	tr|Q5JW53|Q5JW53_HUMANKinetochore-associatedproteinDSN1homolog(Fragment)OS=HomosapiensGN=DSN1PE=1SV=1;sp|Q9H410|DSN1_HUMANKinetochore-associatedproteinDSN1homologOS=HomosapiensGN=DSN1PE=1SV=2	0	0	0	1	0	0	0	0	0	0	1;1	1;1	1;1	;	2	1	1	1	0	0	0	1	0	0	0	0	0	1	0	0	0	0	0	1	0	0	6.6	6.6	6.6	27.281	241	241;356	0.0057692	6.1101	0	0	0	6.6
sp|Q9H5V9|CX056_HUMANUPF0428proteinCXorf56OS=HomosapiensGN=CXorf56PE=1SV=1	sp|Q9H5V9|CX056_HUMANUPF0428proteinCXorf56OS=HomosapiensGN=CXorf56PE=1SV=1	0	2149900	0	1	0	0	0	0	2149900	0	1	1	1		1	1	1	1	0	0	0	0	1	0	0	0	0	0	1	0	0	0	0	0	1	0	6.3	6.3	6.3	25.624	222	222	0	6.6685	0	0	0	0
tr|Q5JR04|Q5JR04_HUMANMov10,Moloneyleukemiavirus10,homolog(Mouse),isoformCRA_aOS=HomosapiensGN=MOV10PE=1SV=1;sp|Q9HCE1|MOV10_HUMANPutativehelicaseMOV-10OS=HomosapiensGN=MOV10PE=1SV=2	tr|Q5JR04|Q5JR04_HUMANMov10,Moloneyleukemiavirus10,homolog(Mouse),isoformCRA_aOS=HomosapiensGN=MOV10PE=1SV=1;sp|Q9HCE1|MOV10_HUMANPutativehelicaseMOV-10OS=HomosapiensGN=MOV10PE=1SV=2	7198200	0	0	1	0	0	0	7198200	0	0	4;4	4;4	4;4	;	2	4	4	4	0	0	0	4	0	1	0	0	0	4	0	1	0	0	0	4	0	1	4.8	4.8	4.8	107.21	947	947;1003	0	24.63	0	0	0	4.8
tr|E9PJF5|E9PJF5_HUMANBreastcancermetastasis-suppressor1(Fragment)OS=HomosapiensGN=BRMS1PE=1SV=1;sp|Q9HCU9|BRMS1_HUMANBreastcancermetastasis-suppressor1OS=HomosapiensGN=BRMS1PE=1SV=1;tr|H0YCF7|H0YCF7_HUMANBreastcancermetastasis-suppressor1(Fragment)OS=HomosapiensGN=BRMS1PE=1SV=1;tr|G5E9I4|G5E9I4_HUMANBreastcancermetastasissuppressor1,isoformCRA_cOS=HomosapiensGN=BRMS1PE=1SV=1;tr|E9PPD1|E9PPD1_HUM…	tr|E9PJF5|E9PJF5_HUMANBreastcancermetastasis-suppressor1(Fragment)OS=HomosapiensGN=BRMS1PE=1SV=1;sp|Q9HCU9|BRMS1_HUMANBreastcancermetastasis-suppressor1OS=HomosapiensGN=BRMS1PE=1SV=1;tr|H0YCF7|H0YCF7_HUMANBreastcancermetastasis-suppressor1(Fragment)OS=HomosapiensGN=BRMS1PE=1SV=1;tr|G5E9I4|G5E9I4_HUMANBreastcancermetastasissuppressor1,isoformCRA_cOS=HomosapiensGN=BRMS1PE=1SV=1;tr|E9PPD1|E9PPD1_HUM…	3447200	0	0	1	0	0	0	3447200	0	0	2;2;2;2;1	2;2;2;2;1	2;2;2;2;1	;;;;	5	2	2	2	1	0	0	2	0	0	1	0	0	2	0	0	1	0	0	2	0	0	8.6	8.6	8.6	28.306	244	244;246;267;290;126	0	16.848	5.3	0	0	8.6
tr|A2A2M0|A2A2M0_HUMANRegulationofnuclearpre-mRNAdomain-containingprotein1B(Fragment)OS=HomosapiensGN=RPRD1BPE=1SV=1;sp|Q9NQG5|RPR1B_HUMANRegulationofnuclearpre-mRNAdomain-containingprotein1BOS=HomosapiensGN=RPRD1BPE=1SV=1	tr|A2A2M0|A2A2M0_HUMANRegulationofnuclearpre-mRNAdomain-containingprotein1B(Fragment)OS=HomosapiensGN=RPRD1BPE=1SV=1;sp|Q9NQG5|RPR1B_HUMANRegulationofnuclearpre-mRNAdomain-containingprotein1BOS=HomosapiensGN=RPRD1BPE=1SV=1	566640	0	0	1	0	0	0	566640	0	0	1;1	1;1	1;1	;	2	1	1	1	0	0	0	1	0	0	0	0	0	1	0	0	0	0	0	1	0	0	8.1	8.1	8.1	22.128	197	197;326	0.0057252	6.0658	0	0	0	8.1
sp|Q9NQT5|EXOS3_HUMANExosomecomplexcomponentRRP40OS=HomosapiensGN=EXOSC3PE=1SV=3	sp|Q9NQT5|EXOS3_HUMANExosomecomplexcomponentRRP40OS=HomosapiensGN=EXOSC3PE=1SV=3	0	6137000	0	1	0	0	0	0	6137000	0	3	3	3		1	3	3	3	0	0	0	0	2	3	0	0	0	0	2	3	0	0	0	0	2	3	17.8	17.8	17.8	29.572	275	275	0	21.967	0	0	0	0
sp|Q9NQX5|NPDC1_HUMANNeuralproliferationdifferentiationandcontrolprotein1OS=HomosapiensGN=NPDC1PE=1SV=2	sp|Q9NQX5|NPDC1_HUMANNeuralproliferationdifferentiationandcontrolprotein1OS=HomosapiensGN=NPDC1PE=1SV=2	21658000	0	0	1	0	0	0	21658000	0	0	1	1	1		1	1	1	1	1	0	0	1	0	0	1	0	0	1	0	0	1	0	0	1	0	0	4	4	4	34.516	325	325	0.0057361	6.0887	4	0	0	4
tr|K7EQG1|K7EQG1_HUMANGlutaminyl-peptidecyclotransferase-likeproteinOS=HomosapiensGN=QPCTLPE=1SV=1;sp|Q9NXS2|QPCTL_HUMANGlutaminyl-peptidecyclotransferase-likeproteinOS=HomosapiensGN=QPCTLPE=1SV=2	tr|K7EQG1|K7EQG1_HUMANGlutaminyl-peptidecyclotransferase-likeproteinOS=HomosapiensGN=QPCTLPE=1SV=1;sp|Q9NXS2|QPCTL_HUMANGlutaminyl-peptidecyclotransferase-likeproteinOS=HomosapiensGN=QPCTLPE=1SV=2	3109300	0	0	1	0	0	0	3109300	0	0	1;1	1;1	1;1	;	2	1	1	1	1	0	0	1	0	0	1	0	0	1	0	0	1	0	0	1	0	0	9.1	9.1	9.1	13.98	121	121;382	0	7.0122	9.1	0	0	9.1
sp|Q9NYL9|TMOD3_HUMANTropomodulin-3OS=HomosapiensGN=TMOD3PE=1SV=1;tr|H0YKU1|H0YKU1_HUMANTropomodulin-3(Fragment)OS=HomosapiensGN=TMOD3PE=1SV=1;tr|H0YNJ8|H0YNJ8_HUMANTropomodulin-3OS=HomosapiensGN=TMOD3PE=1SV=1;tr|G5EA42|G5EA42_HUMANTropomodulin2(Neuronal),isoformCRA_aOS=HomosapiensGN=TMOD2PE=1SV=1;sp|Q9NZR1|TMOD2_HUMANTropomodulin-2OS=HomosapiensGN=TMOD2PE=1SV=1	sp|Q9NYL9|TMOD3_HUMANTropomodulin-3OS=HomosapiensGN=TMOD3PE=1SV=1;tr|H0YKU1|H0YKU1_HUMANTropomodulin-3(Fragment)OS=HomosapiensGN=TMOD3PE=1SV=1;tr|H0YNJ8|H0YNJ8_HUMANTropomodulin-3OS=HomosapiensGN=TMOD3PE=1SV=1	5743700	0	0	1	0	0	0	5743700	0	0	7;4;4;1;1	7;4;4;1;1	7;4;4;1;1	;;	5	7	7	7	0	4	2	3	0	0	0	4	2	3	0	0	0	4	2	3	0	0	25	25	25	39.594	352	352;187;213;307;351	0	60.403	0	15.6	7.1	9.4
sp|Q9NYU2|UGGG1_HUMANUDP-glucose:glycoproteinglucosyltransferase1OS=HomosapiensGN=UGGT1PE=1SV=3;tr|H7BZG0|H7BZG0_HUMANUDP-glucose:glycoproteinglucosyltransferase1(Fragment)OS=HomosapiensGN=UGGT1PE=1SV=1;sp|Q9NYU1|UGGG2_HUMANUDP-glucose:glycoproteinglucosyltransferase2OS=HomosapiensGN=UGGT2PE=1SV=4	sp|Q9NYU2|UGGG1_HUMANUDP-glucose:glycoproteinglucosyltransferase1OS=HomosapiensGN=UGGT1PE=1SV=3;tr|H7BZG0|H7BZG0_HUMANUDP-glucose:glycoproteinglucosyltransferase1(Fragment)OS=HomosapiensGN=UGGT1PE=1SV=1;sp|Q9NYU1|UGGG2_HUMANUDP-glucose:glycoproteinglucosyltransferase2OS=HomosapiensGN=UGGT2PE=1SV=4	5250800	0	0	1	0	0	0	5250800	0	0	2;1;1	2;1;1	2;1;1	;;	3	2	2	2	0	0	0	2	0	0	0	0	0	2	0	0	0	0	0	2	0	0	1.2	1.2	1.2	177.19	1555	1555;131;1516	0	12.678	0	0	0	1.2
tr|U3KPZ7|U3KPZ7_HUMANRNA-bindingprotein27OS=HomosapiensGN=RBM27PE=1SV=1;sp|Q9P2N5|RBM27_HUMANRNA-bindingprotein27OS=HomosapiensGN=RBM27PE=1SV=2	tr|U3KPZ7|U3KPZ7_HUMANRNA-bindingprotein27OS=HomosapiensGN=RBM27PE=1SV=1;sp|Q9P2N5|RBM27_HUMANRNA-bindingprotein27OS=HomosapiensGN=RBM27PE=1SV=2	1490900	0	0	1	0	0	0	1490900	0	0	1;1	1;1	1;1	;	2	1	1	1	0	0	0	1	0	0	0	0	0	1	0	0	0	0	0	1	0	0	1.2	1.2	1.2	114.54	1027	1027;1060	0.004	6.2939	0	0	0	1.2
tr|B7Z4K4|B7Z4K4_HUMANPutativetRNA(cytidine(32)/guanosine(34)-2'-O)-methyltransferaseOS=HomosapiensGN=FTSJ1PE=1SV=1;sp|Q9UET6|TRM7_HUMANPutativetRNA(cytidine(32)/guanosine(34)-2'-O)-methyltransferaseOS=HomosapiensGN=FTSJ1PE=1SV=2	tr|B7Z4K4|B7Z4K4_HUMANPutativetRNA(cytidine(32)/guanosine(34)-2'-O)-methyltransferaseOS=HomosapiensGN=FTSJ1PE=1SV=1;sp|Q9UET6|TRM7_HUMANPutativetRNA(cytidine(32)/guanosine(34)-2'-O)-methyltransferaseOS=HomosapiensGN=FTSJ1PE=1SV=2	1394100	0	0	1	0	0	0	1394100	0	0	1;1	1;1	1;1	;	2	1	1	1	0	0	0	1	0	0	0	0	0	1	0	0	0	0	0	1	0	0	6.8	6.8	6.8	21.231	192	192;329	0.0020534	6.4035	0	0	0	6.8
sp|Q9UH17|ABC3B_HUMANDNAdC->dU-editingenzymeAPOBEC-3BOS=HomosapiensGN=APOBEC3BPE=1SV=1;tr|B0QYD3|B0QYD3_HUMANDNAdC->dU-editingenzymeAPOBEC-3BOS=HomosapiensGN=APOBEC3BPE=1SV=1;sp|P31941|ABC3A_HUMANDNAdC->dU-editingenzymeAPOBEC-3AOS=HomosapiensGN=APOBEC3APE=1SV=3;tr|Q6ICH2|Q6ICH2_HUMANBK150C2.9proteinOS=HomosapiensGN=bK150C2.9PE=1SV=1;sp|Q96AK3|ABC3D_HUMANDNAdC->dU-editingenzymeAPOBEC-3DOS=Homosapi…	sp|Q9UH17|ABC3B_HUMANDNAdC->dU-editingenzymeAPOBEC-3BOS=HomosapiensGN=APOBEC3BPE=1SV=1;tr|B0QYD3|B0QYD3_HUMANDNAdC->dU-editingenzymeAPOBEC-3BOS=HomosapiensGN=APOBEC3BPE=1SV=1	7887600	0	0	1	0	0	0	7887600	0	0	5;5;2;2;2	5;5;2;2;2	5;5;2;2;2	;	5	5	5	5	0	0	0	3	2	0	0	0	0	3	2	0	0	0	0	3	2	0	14.7	14.7	14.7	45.924	382	382;490;199;202;386	0	32.052	0	0	0	7.6
sp|Q9UMY1|NOL7_HUMANNucleolarprotein7OS=HomosapiensGN=NOL7PE=1SV=2;tr|H7C2B1|H7C2B1_HUMANNucleolarprotein7(Fragment)OS=HomosapiensGN=NOL7PE=1SV=1	sp|Q9UMY1|NOL7_HUMANNucleolarprotein7OS=HomosapiensGN=NOL7PE=1SV=2;tr|H7C2B1|H7C2B1_HUMANNucleolarprotein7(Fragment)OS=HomosapiensGN=NOL7PE=1SV=1	5124100	0	0	1	0	0	0	5124100	0	0	3;2	3;2	3;2	;	2	3	3	3	0	0	0	3	1	0	0	0	0	3	1	0	0	0	0	3	1	0	12.5	12.5	12.5	29.426	257	257;83	0	19.663	0	0	0	12.5
sp|Q9UN81|LORF1_HUMANLINE-1retrotransposableelementORF1proteinOS=HomosapiensGN=L1RE1PE=1SV=1	sp|Q9UN81|LORF1_HUMANLINE-1retrotransposableelementORF1proteinOS=HomosapiensGN=L1RE1PE=1SV=1	0	1924400	0	1	0	0	0	0	1924400	0	1	1	1		1	1	1	1	0	0	0	0	1	0	0	0	0	0	1	0	0	0	0	0	1	0	3.8	3.8	3.8	40.055	338	338	0	7.3483	0	0	0	0
sp|Q9UNP9|PPIE_HUMANPeptidyl-prolylcis-transisomeraseEOS=HomosapiensGN=PPIEPE=1SV=1;tr|E9PKY5|E9PKY5_HUMANPeptidyl-prolylcis-transisomerase(Fragment)OS=HomosapiensGN=PPIEPE=1SV=1;tr|E9PEQ6|E9PEQ6_HUMANPeptidyl-prolylcis-transisomeraseOS=HomosapiensGN=PPIEPE=1SV=1;tr|E9PK21|E9PK21_HUMANPeptidyl-prolylcis-transisomeraseEOS=HomosapiensGN=PPIEPE=1SV=1;tr|E9PIB0|E9PIB0_HUMANPeptidyl-prolylcis-transiso…	sp|Q9UNP9|PPIE_HUMANPeptidyl-prolylcis-transisomeraseEOS=HomosapiensGN=PPIEPE=1SV=1;tr|E9PKY5|E9PKY5_HUMANPeptidyl-prolylcis-transisomerase(Fragment)OS=HomosapiensGN=PPIEPE=1SV=1;tr|E9PEQ6|E9PEQ6_HUMANPeptidyl-prolylcis-transisomeraseOS=HomosapiensGN=PPIEPE=1SV=1	18459000	0	0	1	0	0	0	18459000	0	0	5;4;4;2;1	5;4;4;2;1	5;4;4;2;1	;;	5	5	5	5	0	0	0	5	1	0	0	0	0	5	1	0	0	0	0	5	1	0	19.9	19.9	19.9	33.43	301	301;213;250;208;72	0	48.886	0	0	0	19.9
tr|K7EK06|K7EK06_HUMANPhenylalanine--tRNAligasealphasubunit(Fragment)OS=HomosapiensGN=FARSAPE=1SV=5;tr|K7ER16|K7ER16_HUMANPhenylalanine--tRNAligasealphasubunitOS=HomosapiensGN=FARSAPE=1SV=1;sp|Q9Y285|SYFA_HUMANPhenylalanine--tRNAligasealphasubunitOS=HomosapiensGN=FARSAPE=1SV=3	tr|K7EK06|K7EK06_HUMANPhenylalanine--tRNAligasealphasubunit(Fragment)OS=HomosapiensGN=FARSAPE=1SV=5;tr|K7ER16|K7ER16_HUMANPhenylalanine--tRNAligasealphasubunitOS=HomosapiensGN=FARSAPE=1SV=1;sp|Q9Y285|SYFA_HUMANPhenylalanine--tRNAligasealphasubunitOS=HomosapiensGN=FARSAPE=1SV=3	0	0	0	1	0	0	0	0	0	0	1;1;1	1;1;1	1;1;1	;;	3	1	1	1	0	1	0	0	0	0	0	1	0	0	0	0	0	1	0	0	0	0	6.5	6.5	6.5	18.502	169	169;235;508	0.0021459	6.6364	0	6.5	0	0
sp|Q9Y295|DRG1_HUMANDevelopmentally-regulatedGTP-bindingprotein1OS=HomosapiensGN=DRG1PE=1SV=1;tr|H0YI06|H0YI06_HUMANDevelopmentally-regulatedGTP-bindingprotein1(Fragment)OS=HomosapiensGN=DRG1PE=1SV=1	sp|Q9Y295|DRG1_HUMANDevelopmentally-regulatedGTP-bindingprotein1OS=HomosapiensGN=DRG1PE=1SV=1	0	7569100	0	1	0	0	0	0	7569100	0	3;1	3;1	3;1		2	3	3	3	0	0	0	0	3	0	0	0	0	0	3	0	0	0	0	0	3	0	11.4	11.4	11.4	40.542	367	367;56	0	18.391	0	0	0	0
tr|A0A087WUI1|A0A087WUI1_HUMANRNA-bindingmotifprotein,X-linked2OS=HomosapiensGN=RBMX2PE=1SV=1;sp|Q9Y388|RBMX2_HUMANRNA-bindingmotifprotein,X-linked2OS=HomosapiensGN=RBMX2PE=1SV=2	tr|A0A087WUI1|A0A087WUI1_HUMANRNA-bindingmotifprotein,X-linked2OS=HomosapiensGN=RBMX2PE=1SV=1;sp|Q9Y388|RBMX2_HUMANRNA-bindingmotifprotein,X-linked2OS=HomosapiensGN=RBMX2PE=1SV=2	0	1472000	0	1	0	0	0	0	1472000	0	1;1	1;1	1;1	;	2	1	1	1	0	0	0	0	1	0	0	0	0	0	1	0	0	0	0	0	1	0	4.7	4.7	4.7	31.576	275	275;322	0.0020833	6.4713	0	0	0	0
sp|Q9Y3A2|UTP11_HUMANProbableU3smallnucleolarRNA-associatedprotein11OS=HomosapiensGN=UTP11LPE=1SV=2	sp|Q9Y3A2|UTP11_HUMANProbableU3smallnucleolarRNA-associatedprotein11OS=HomosapiensGN=UTP11LPE=1SV=2	0	5142300	0	1	0	0	0	0	5142300	0	1	1	1		1	1	1	1	0	0	0	0	1	0	0	0	0	0	1	0	0	0	0	0	1	0	7.9	7.9	7.9	30.446	253	253	0	7.1879	0	0	0	0
sp|Q9Y3B9|RRP15_HUMANRRP15-likeproteinOS=HomosapiensGN=RRP15PE=1SV=2	sp|Q9Y3B9|RRP15_HUMANRRP15-likeproteinOS=HomosapiensGN=RRP15PE=1SV=2	0	22441000	0	1	0	0	0	0	22441000	0	2	2	2		1	2	2	2	0	0	0	1	1	0	0	0	0	1	1	0	0	0	0	1	1	0	7.8	7.8	7.8	31.484	282	282	0	12.301	0	0	0	3.9
sp|Q9Y3F4|STRAP_HUMANSerine-threoninekinasereceptor-associatedproteinOS=HomosapiensGN=STRAPPE=1SV=1	sp|Q9Y3F4|STRAP_HUMANSerine-threoninekinasereceptor-associatedproteinOS=HomosapiensGN=STRAPPE=1SV=1	0	1593900	0	1	0	0	0	0	1593900	0	1	1	1		1	1	1	1	0	0	0	0	1	0	0	0	0	0	1	0	0	0	0	0	1	0	5.1	5.1	5.1	38.438	350	350	0	8.971	0	0	0	0
tr|J3QLD6|J3QLD6_HUMANU3smallnucleolarRNA-associatedprotein18homolog(Fragment)OS=HomosapiensGN=UTP18PE=1SV=1;tr|J3QRG0|J3QRG0_HUMANU3smallnucleolarRNA-associatedprotein18homolog(Fragment)OS=HomosapiensGN=UTP18PE=1SV=2;tr|J3QR85|J3QR85_HUMANU3smallnucleolarRNA-associatedprotein18homolog(Fragment)OS=HomosapiensGN=UTP18PE=1SV=1;tr|J3KSR7|J3KSR7_HUMANU3smallnucleolarRNA-associatedprotein18homolog(Fra…	tr|J3QLD6|J3QLD6_HUMANU3smallnucleolarRNA-associatedprotein18homolog(Fragment)OS=HomosapiensGN=UTP18PE=1SV=1;tr|J3QRG0|J3QRG0_HUMANU3smallnucleolarRNA-associatedprotein18homolog(Fragment)OS=HomosapiensGN=UTP18PE=1SV=2;tr|J3QR85|J3QR85_HUMANU3smallnucleolarRNA-associatedprotein18homolog(Fragment)OS=HomosapiensGN=UTP18PE=1SV=1;tr|J3KSR7|J3KSR7_HUMANU3smallnucleolarRNA-associatedprotein18homolog(Fra…	0	992060	0	1	0	0	0	0	992060	0	1;1;1;1;1	1;1;1;1;1	1;1;1;1;1	;;;;	5	1	1	1	0	0	0	0	1	0	0	0	0	0	1	0	0	0	0	0	1	0	13.9	13.9	13.9	12.673	115	115;123;143;177;556	0.0057034	6.0602	0	0	0	0
tr|A0A0A0MRM8|A0A0A0MRM8_HUMANUnconventionalmyosin-VIOS=HomosapiensGN=MYO6PE=1SV=1;tr|A0A0D9SGC1|A0A0D9SGC1_HUMANUnconventionalmyosin-VIOS=HomosapiensGN=MYO6PE=1SV=1;sp|Q9UM54|MYO6_HUMANUnconventionalmyosin-VIOS=HomosapiensGN=MYO6PE=1SV=4;tr|E7EW20|E7EW20_HUMANUnconventionalmyosin-VIOS=HomosapiensGN=MYO6PE=1SV=2	tr|A0A0A0MRM8|A0A0A0MRM8_HUMANUnconventionalmyosin-VIOS=HomosapiensGN=MYO6PE=1SV=1;tr|A0A0D9SGC1|A0A0D9SGC1_HUMANUnconventionalmyosin-VIOS=HomosapiensGN=MYO6PE=1SV=1;sp|Q9UM54|MYO6_HUMANUnconventionalmyosin-VIOS=HomosapiensGN=MYO6PE=1SV=4;tr|E7EW20|E7EW20_HUMANUnconventionalmyosin-VIOS=HomosapiensGN=MYO6PE=1SV=2	1222100	0	0	1	0	0	0	1222100	0	0	3;2;2;2	3;2;2;2	3;2;2;2	;;;	4	3	3	3	0	2	0	1	0	0	0	2	0	1	0	0	0	2	0	1	0	0	3	3	3	145.01	1253	1253;1294;1294;1295	0	18.038	0	2.2	0	0.7
tr|F8W9U4|F8W9U4_HUMANMicrotubule-associatedproteinOS=HomosapiensGN=MAP4PE=1SV=1;tr|H0Y2V1|H0Y2V1_HUMANMicrotubule-associatedprotein(Fragment)OS=HomosapiensGN=MAP4PE=1SV=1;sp|P27816|MAP4_HUMANMicrotubule-associatedprotein4OS=HomosapiensGN=MAP4PE=1SV=3;tr|E7EVA0|E7EVA0_HUMANMicrotubule-associatedproteinOS=HomosapiensGN=MAP4PE=1SV=1;tr|H7C4C5|H7C4C5_HUMANMicrotubule-associatedprotein(Fragment)OS=Ho…	tr|F8W9U4|F8W9U4_HUMANMicrotubule-associatedproteinOS=HomosapiensGN=MAP4PE=1SV=1;tr|H0Y2V1|H0Y2V1_HUMANMicrotubule-associatedprotein(Fragment)OS=HomosapiensGN=MAP4PE=1SV=1;sp|P27816|MAP4_HUMANMicrotubule-associatedprotein4OS=HomosapiensGN=MAP4PE=1SV=3;tr|E7EVA0|E7EVA0_HUMANMicrotubule-associatedproteinOS=HomosapiensGN=MAP4PE=1SV=1;tr|H7C4C5|H7C4C5_HUMANMicrotubule-associatedprotein(Fragment)OS=Ho…	4852500	0	0	1	0	0	0	4852500	0	0	4;3;3;3;2;1	4;3;3;3;2;1	4;3;3;3;2;1	;;;;	6	4	4	4	2	0	0	3	0	0	2	0	0	3	0	0	2	0	0	3	0	0	5.8	5.8	5.8	88.276	828	828;463;1152;2297;493;712	0	25.111	3.6	0	0	4.2
tr|H7C1I8|H7C1I8_HUMANProbableC-mannosyltransferaseDPY19L1(Fragment)OS=HomosapiensGN=DPY19L1PE=1SV=1	tr|H7C1I8|H7C1I8_HUMANProbableC-mannosyltransferaseDPY19L1(Fragment)OS=HomosapiensGN=DPY19L1PE=1SV=1	887490	0	0	1	0	0	0	887490	0	0	1	1	1		1	1	1	1	0	0	0	1	0	0	0	0	0	1	0	0	0	0	0	1	0	0	5.8	5.8	5.8	23.799	206	206	0.0057582	6.1078	0	0	0	5.8
[truncated: 28 more columns]
